# Supplementary material
Source: PubMed Central journal article supplement (PMC3075796)

Figure S1 – UPGMA tree for ASB1 orthologs

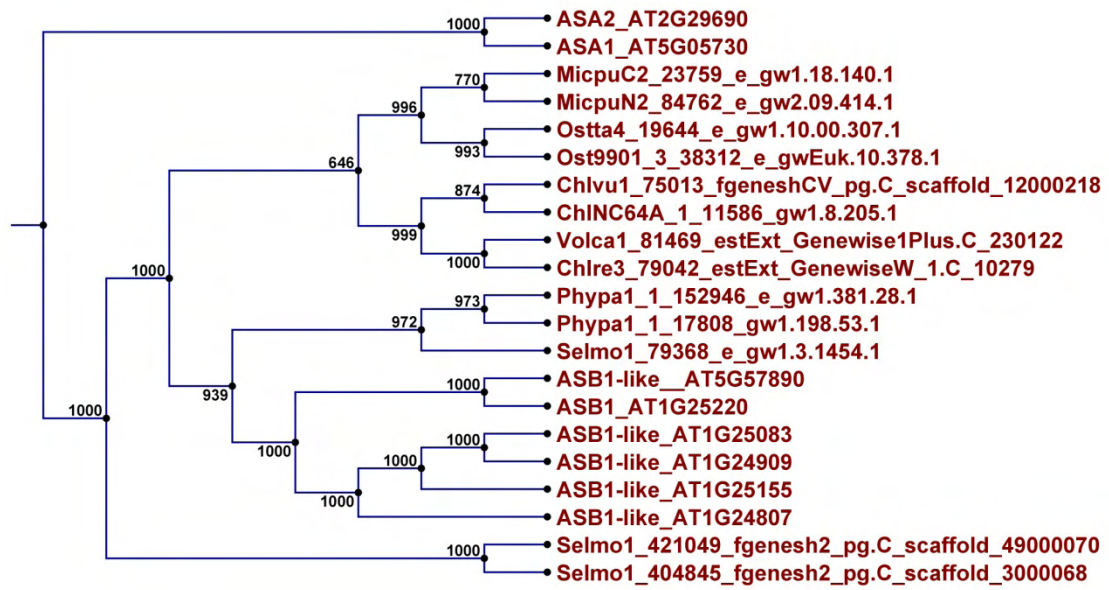

Figure S2 – UPGMA tree for ASA1-ASA2 orthologs

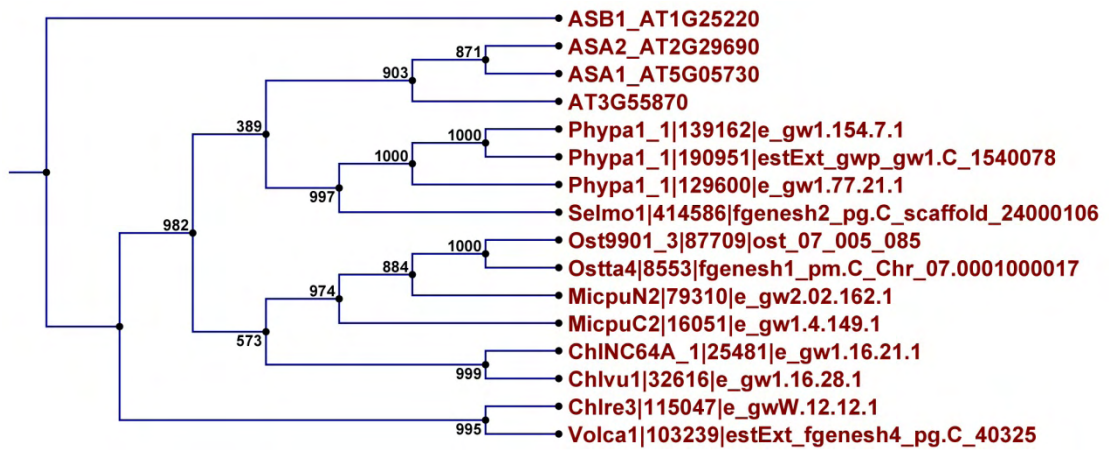

Figure S3 – UPGMA tree for PAT1 orthologs

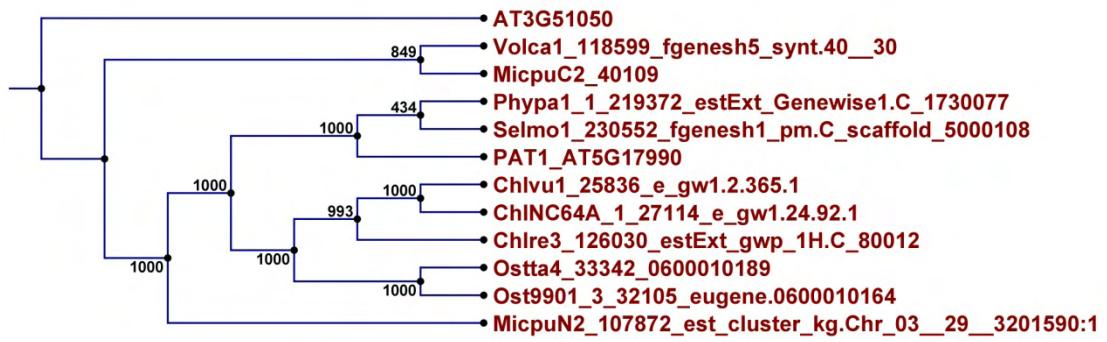

Figure S4 – UPGMA tree for PAI1,2,3 orthologs

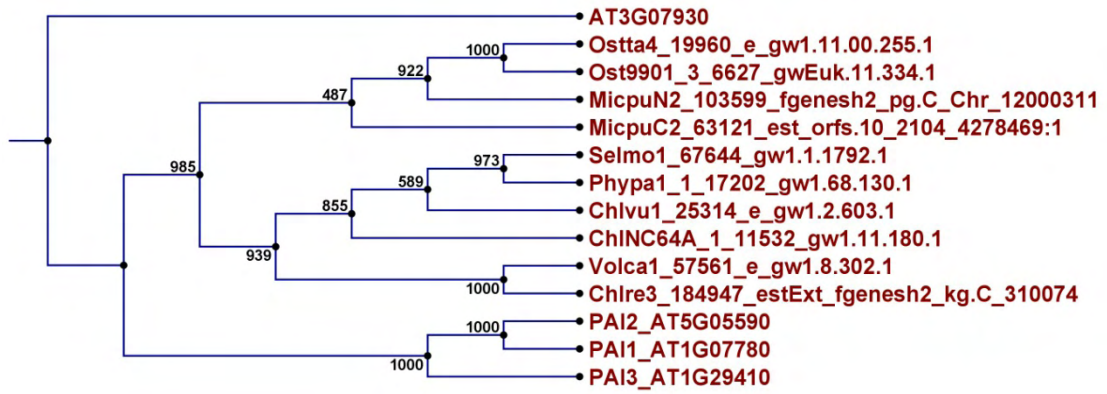

Figure S5 – UPGMA tree for IGPS orthologs

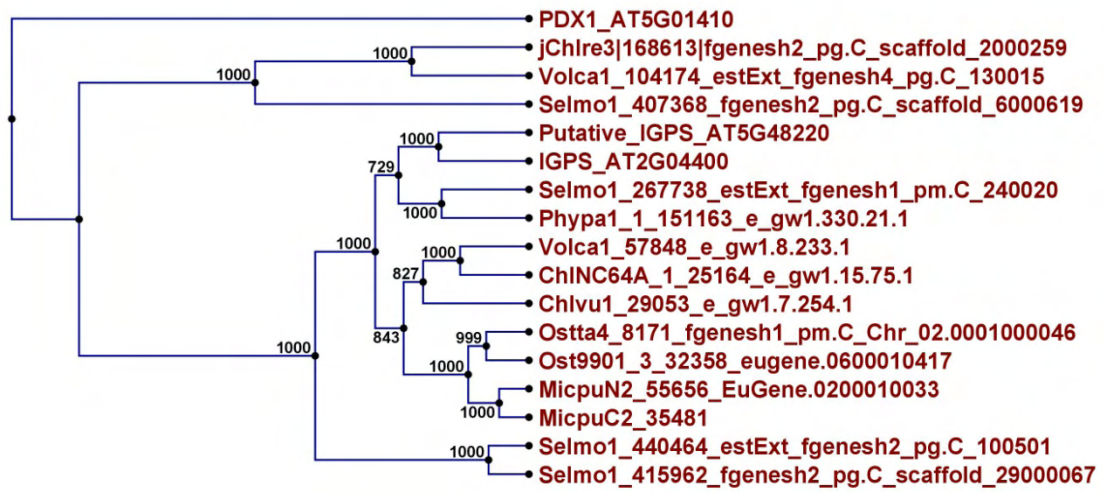

Figure S6 – UPGMA tree for TSA1 orthologs

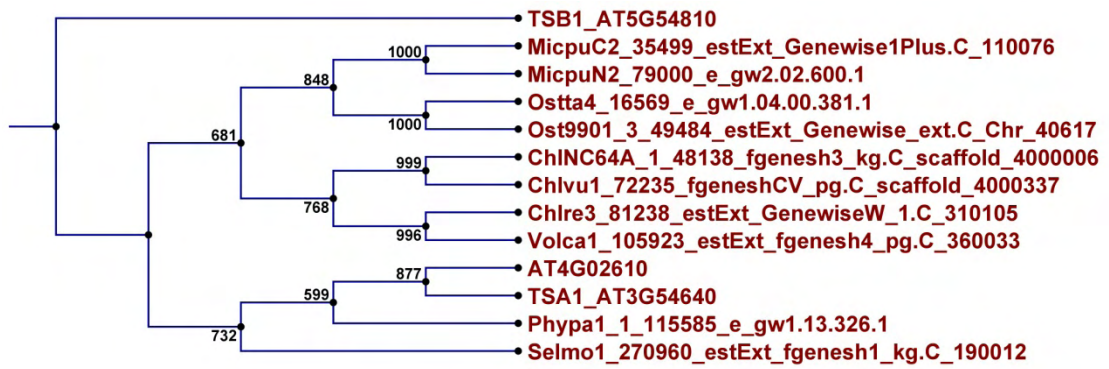

Figure S7 – UPGMA tree for TSB1-TSB2 orthologs

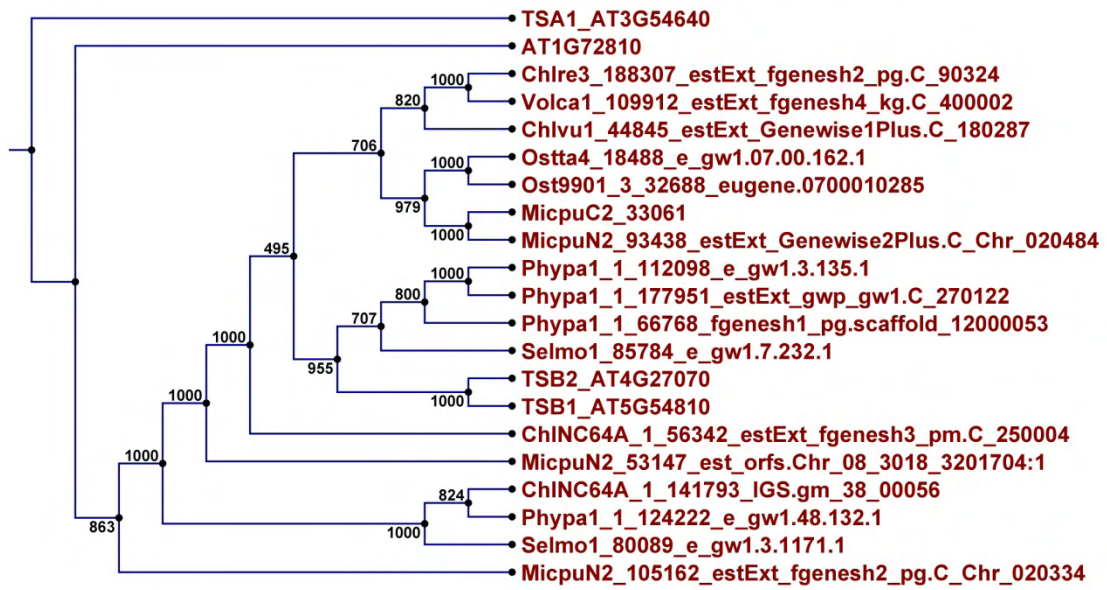

Figure S8 – UPGMA tree for TAA1-TAR1-TAR2-TAR3-TAR4 orthologs

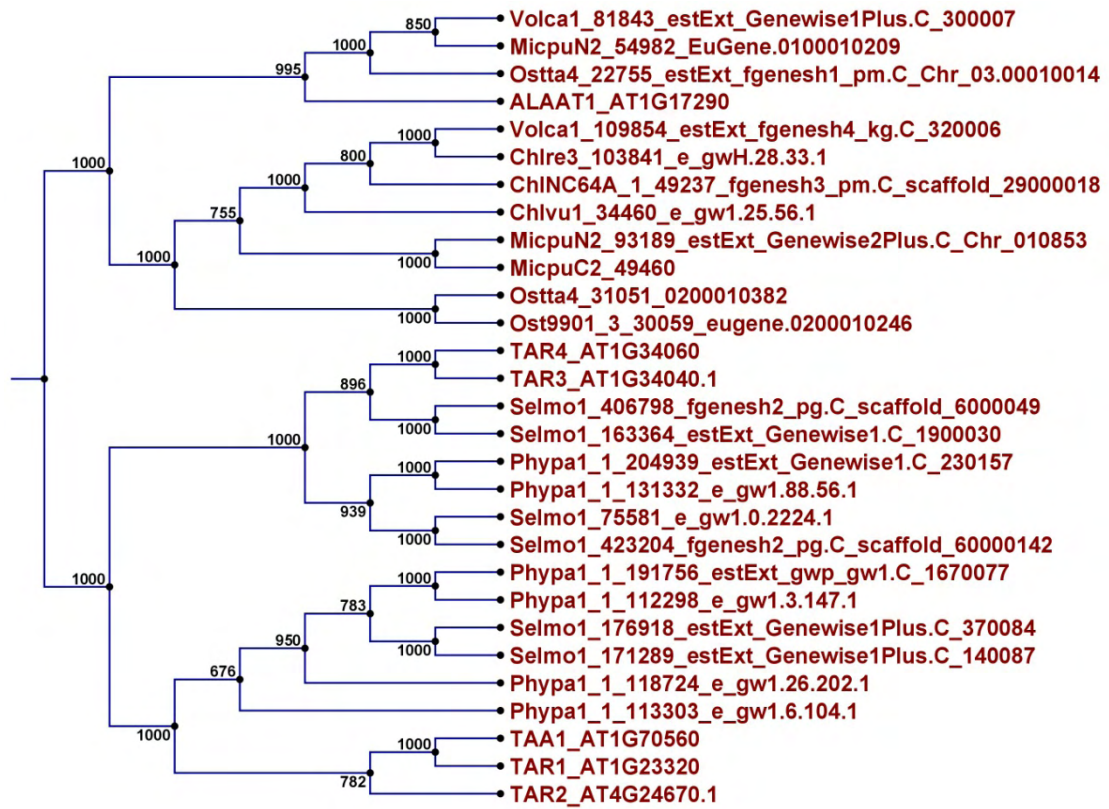



Figure S9 – UPGMA tree for SUR1 orthologs

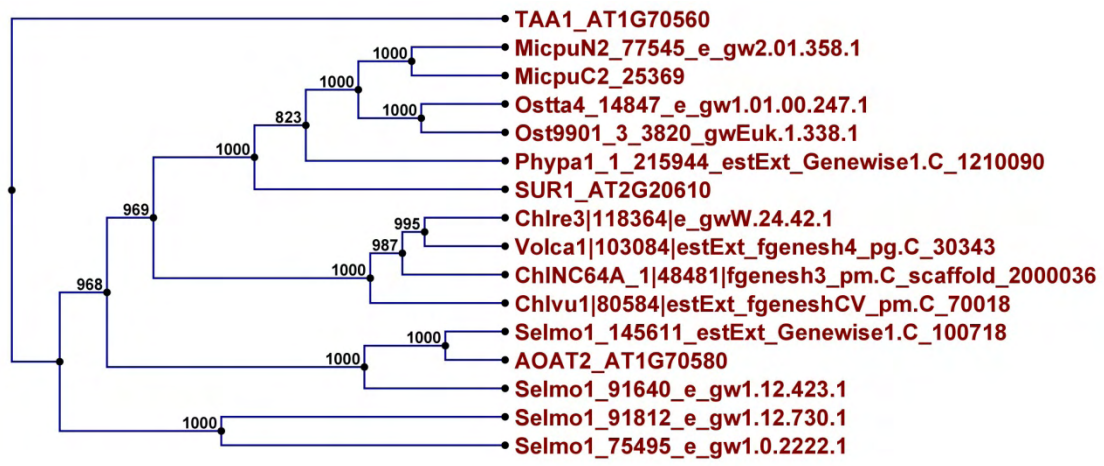

Figure S10 – UPGMA tree for UGT74B1 and UGT84B1

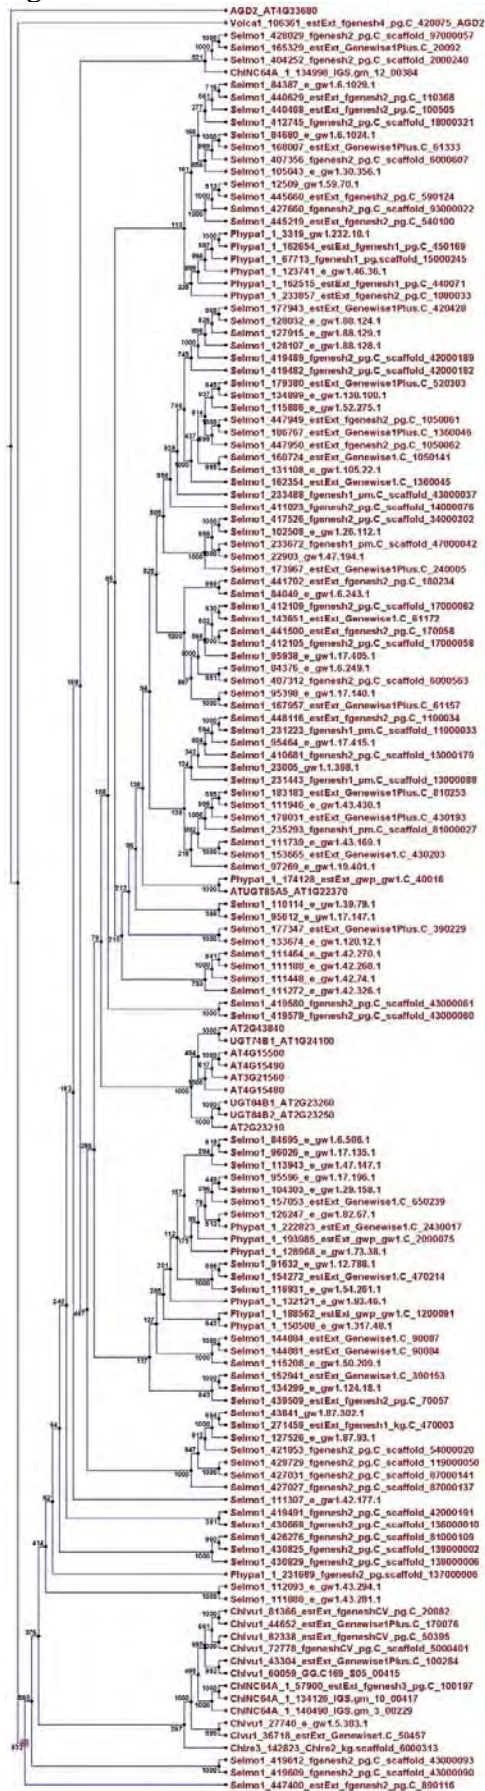

Figure S11 – UPGMA tree for ST5A orthologs

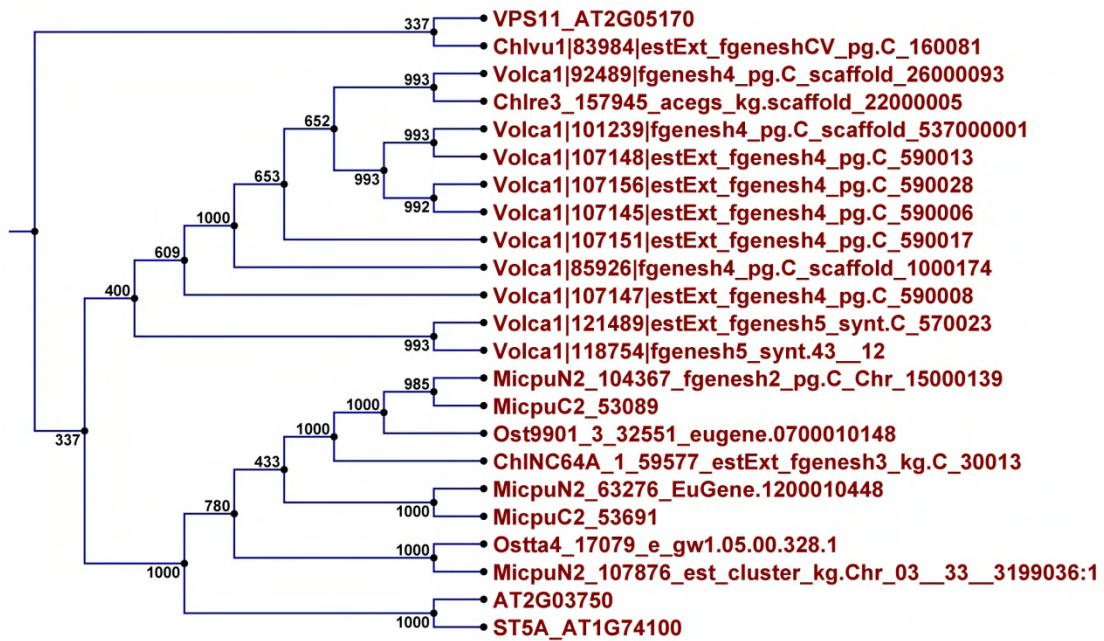

Figure S12 – UPGMA tree for TGG1-TGG2 orthologs

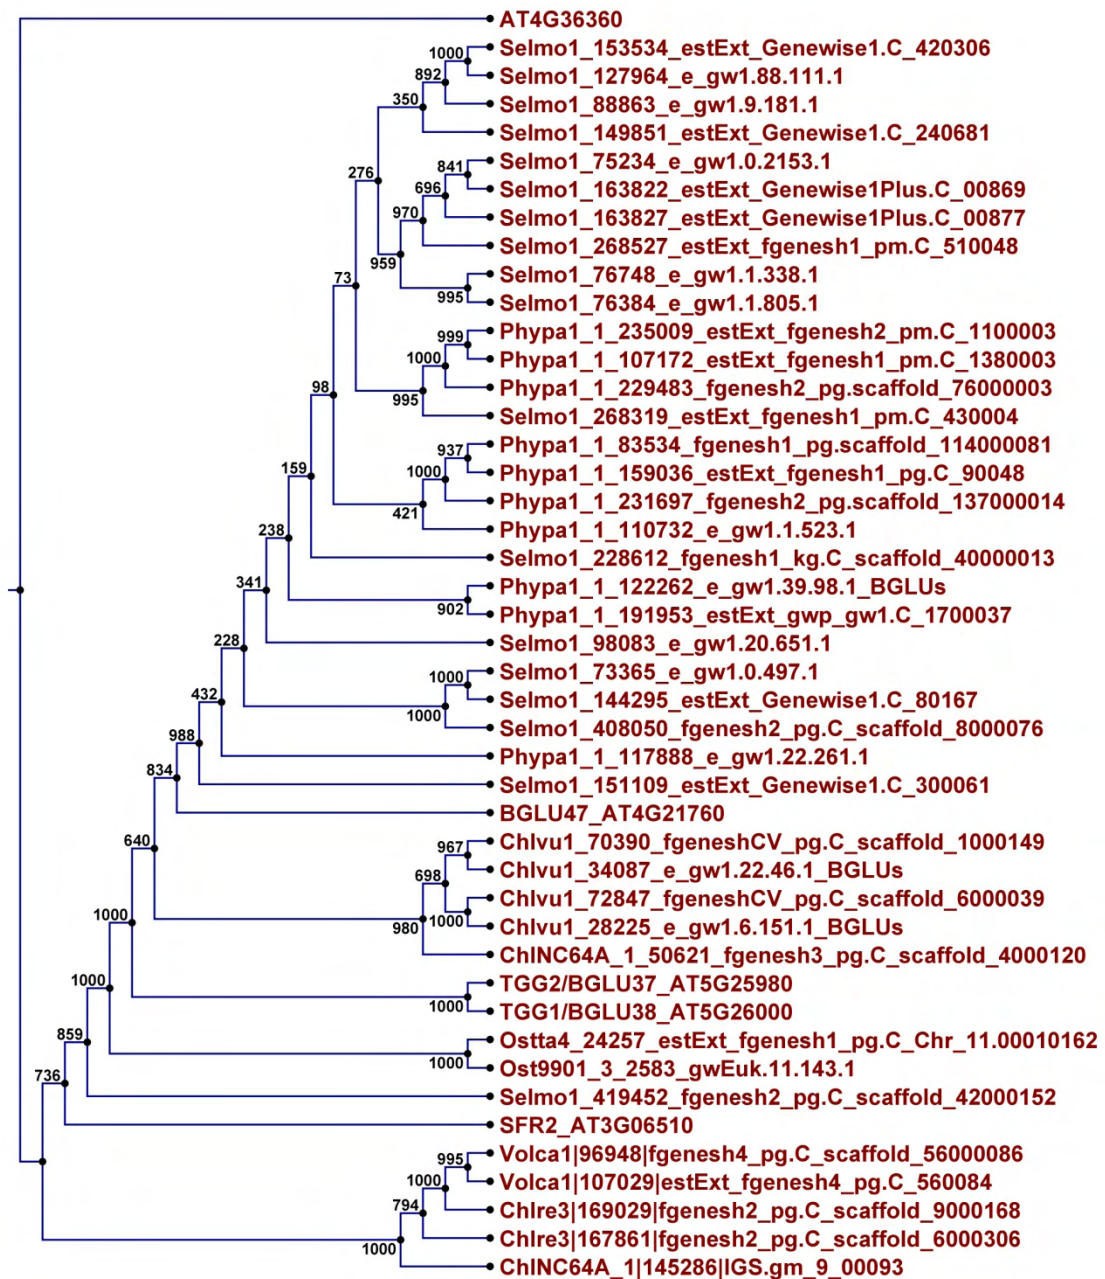

Figure S13 – UPGMA tree for ESP orthologs

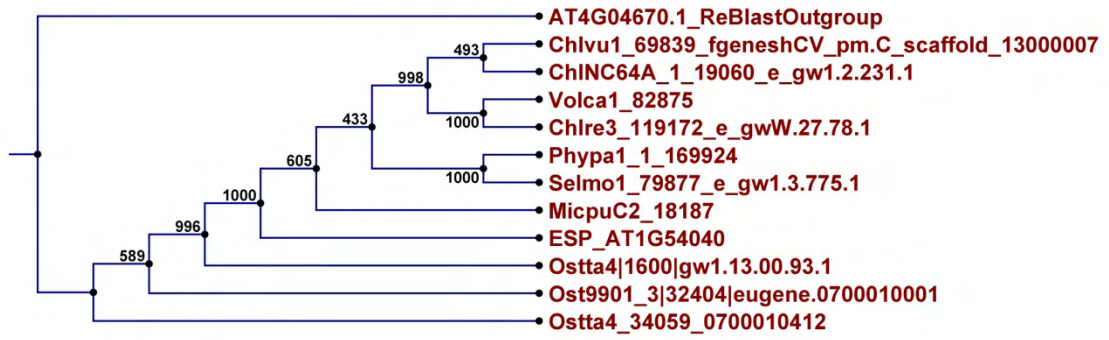

Figure S14 – UPGMA tree for ESM1 orthologs

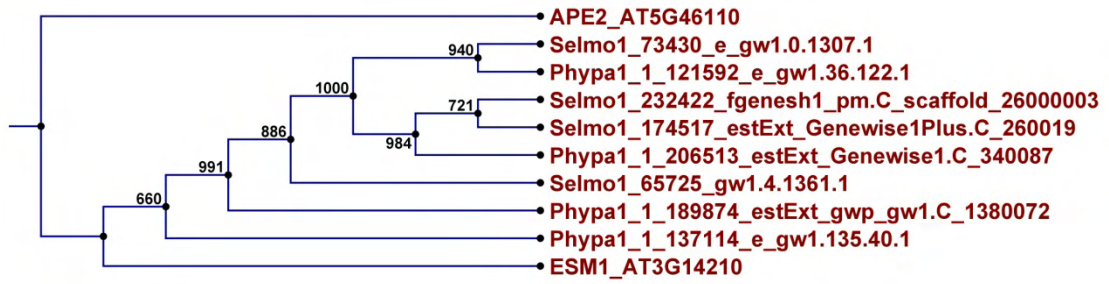

Figure S15 – UPGMA tree for YUCCA orthologs

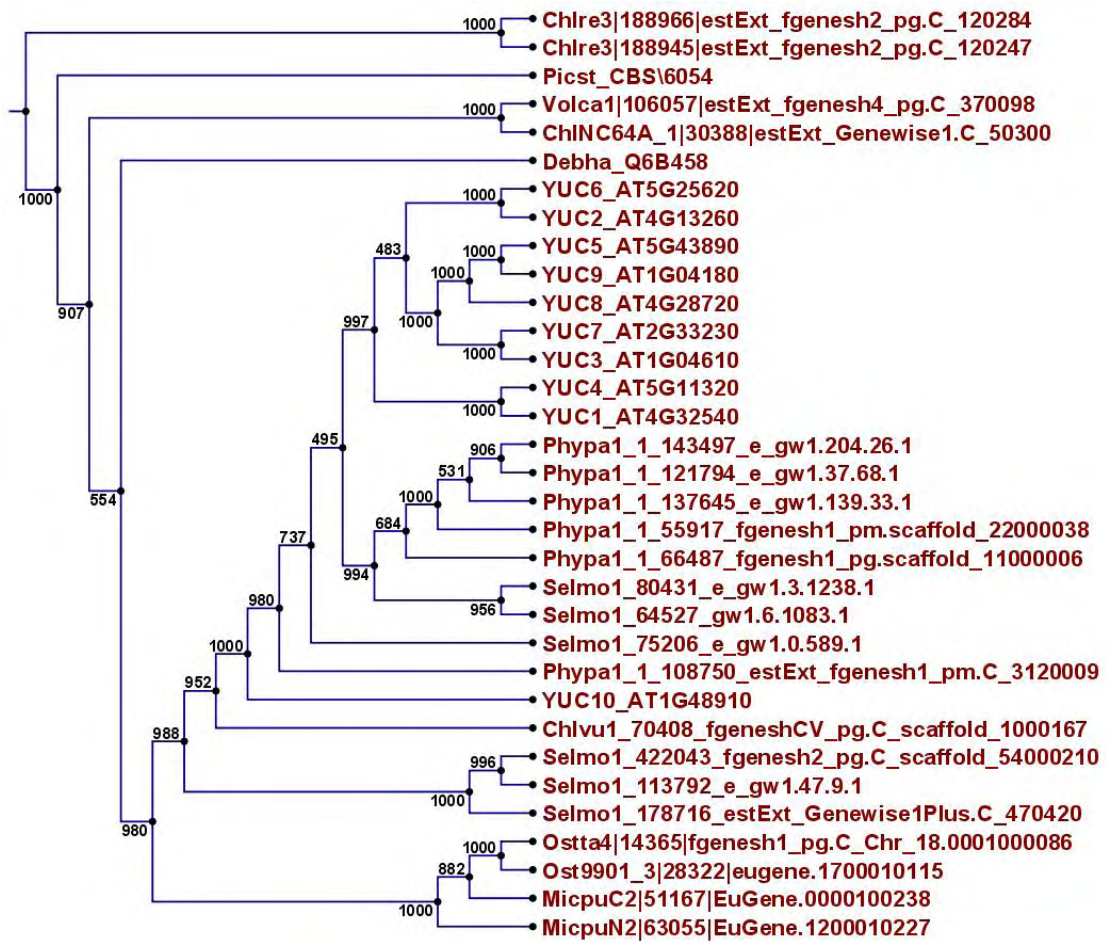

Figure S16 – UPGMA tree for AMI1 orthologs

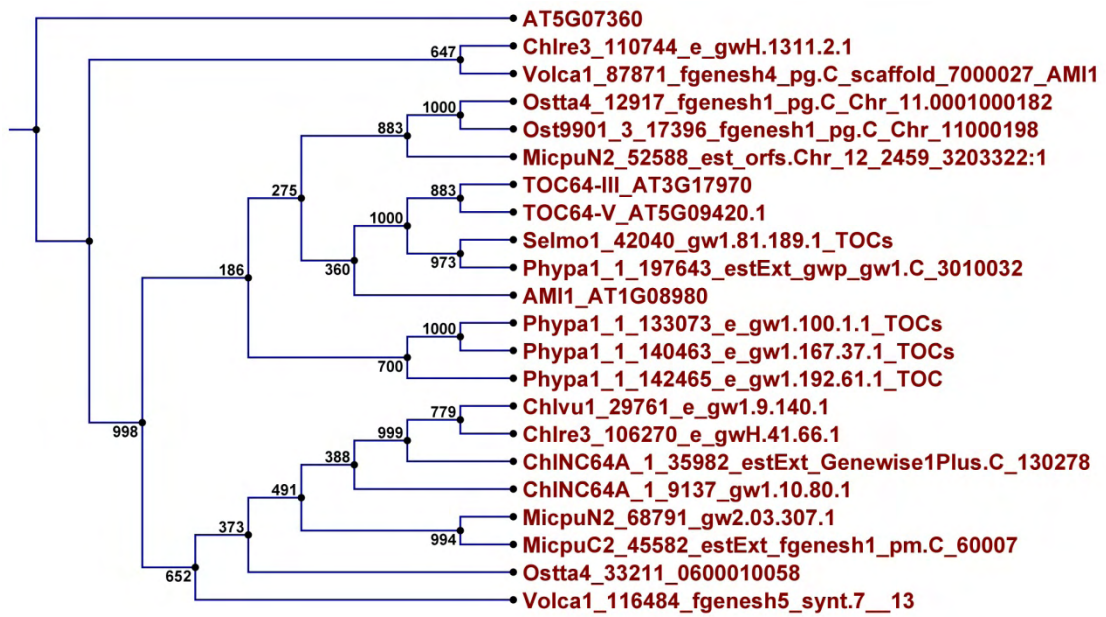



Figure S17 – UPGMA tree for NITRILASES orthologs

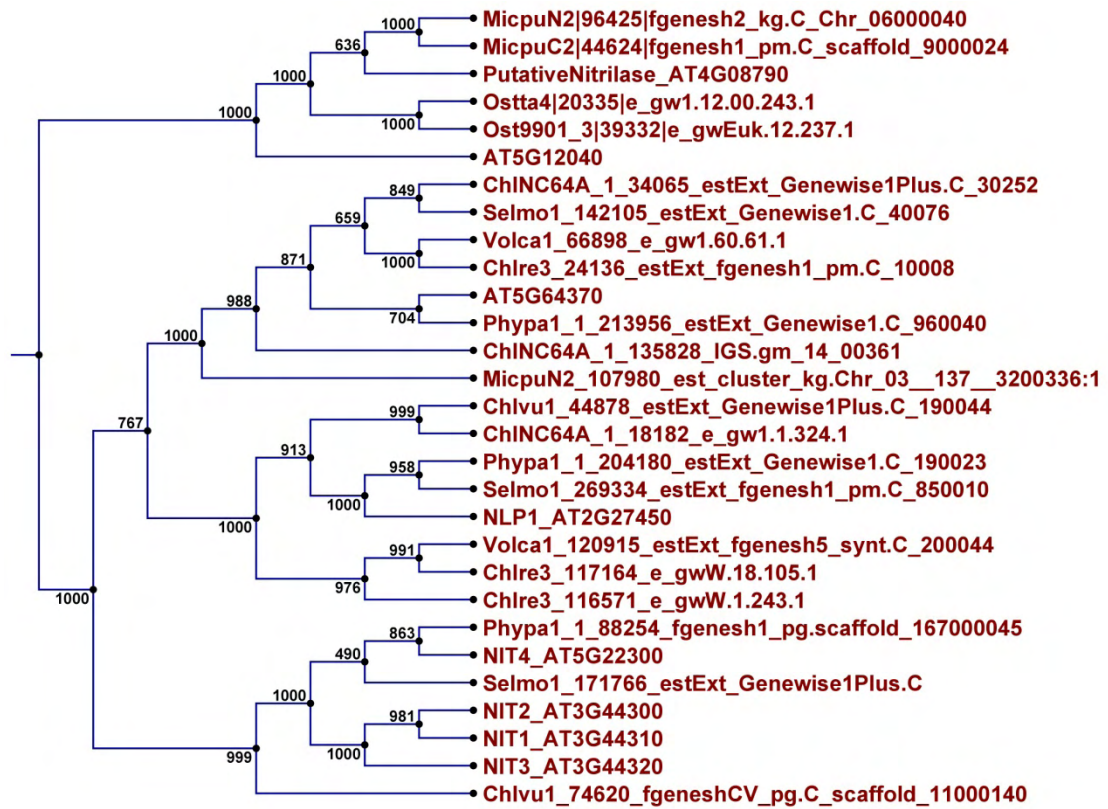

Figure S18 – UPGMA tree for ILL1-6-ILR1-IAR3 orthologs

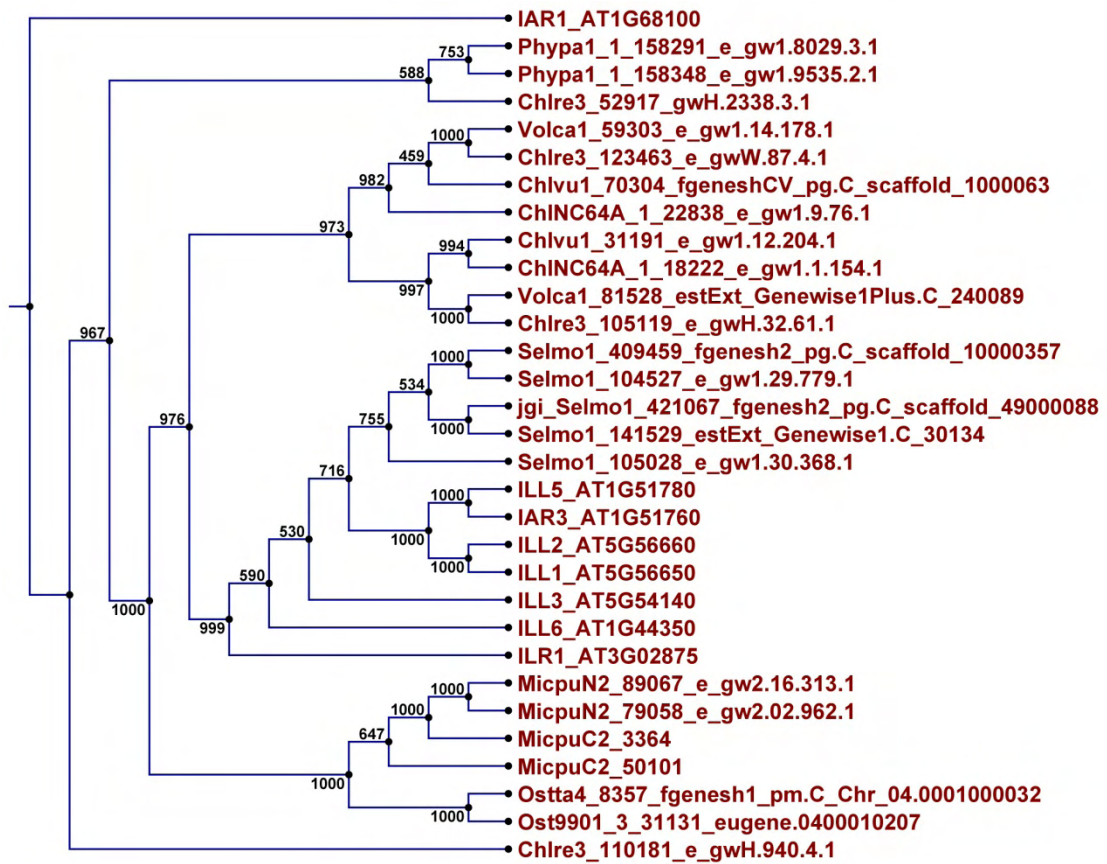

Figure S19 – UPGMA tree for GH3s

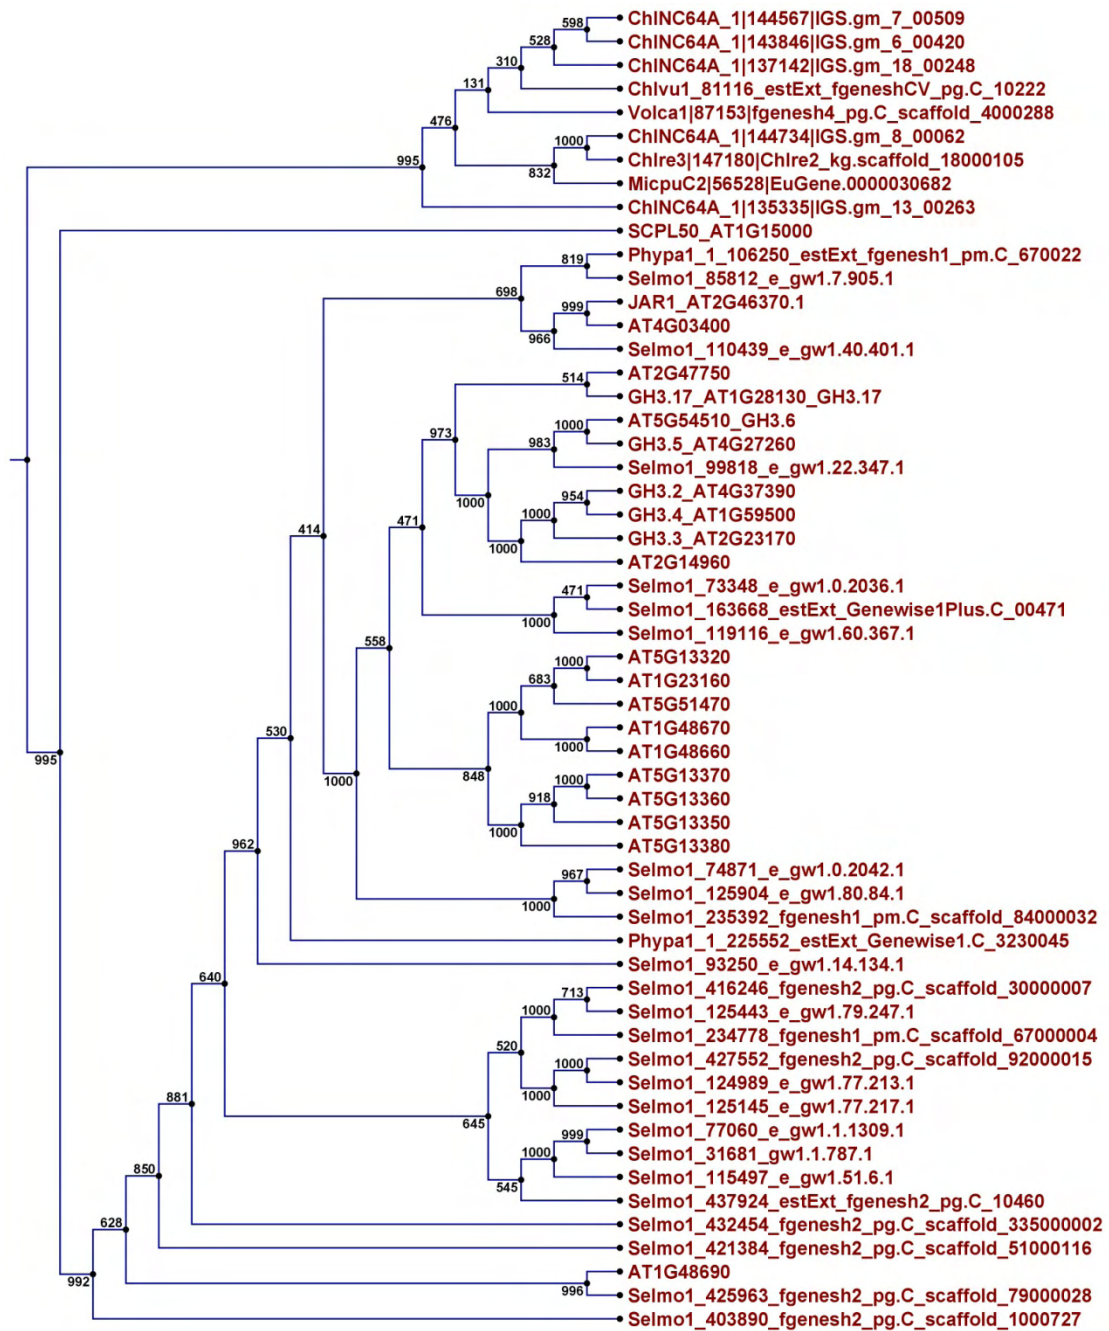

Figure S20 – UPGMA tree for IAR4 orthologs

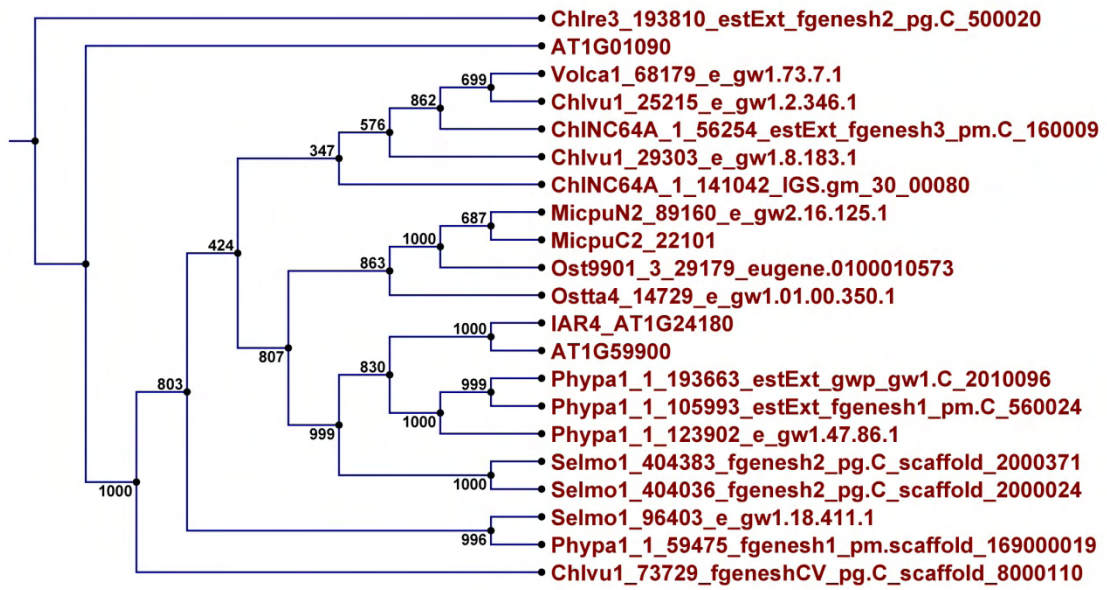

Figure S21 – UPGMA tree for IAMT1 orthologs

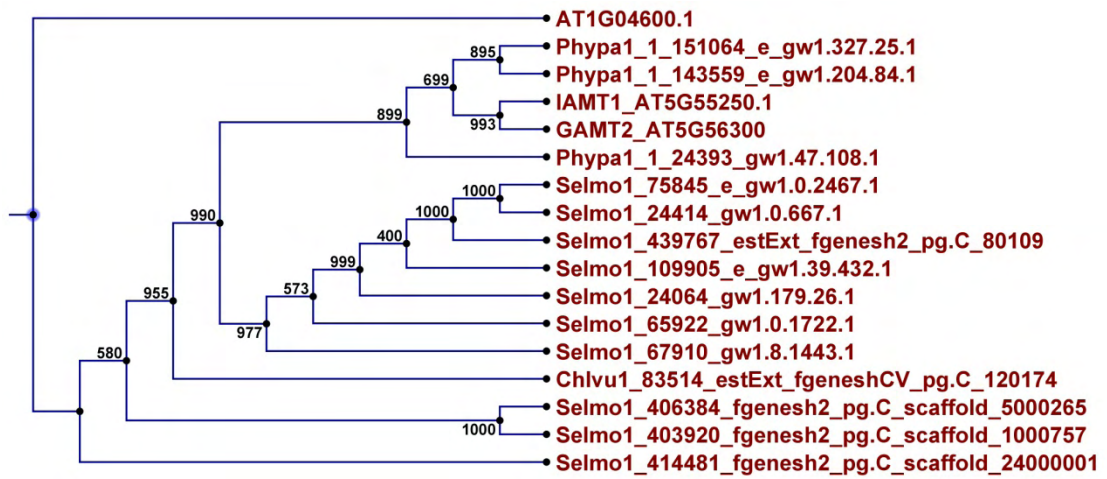

Figure S22 – Alignment of AtPIN proteins and putative orthologs

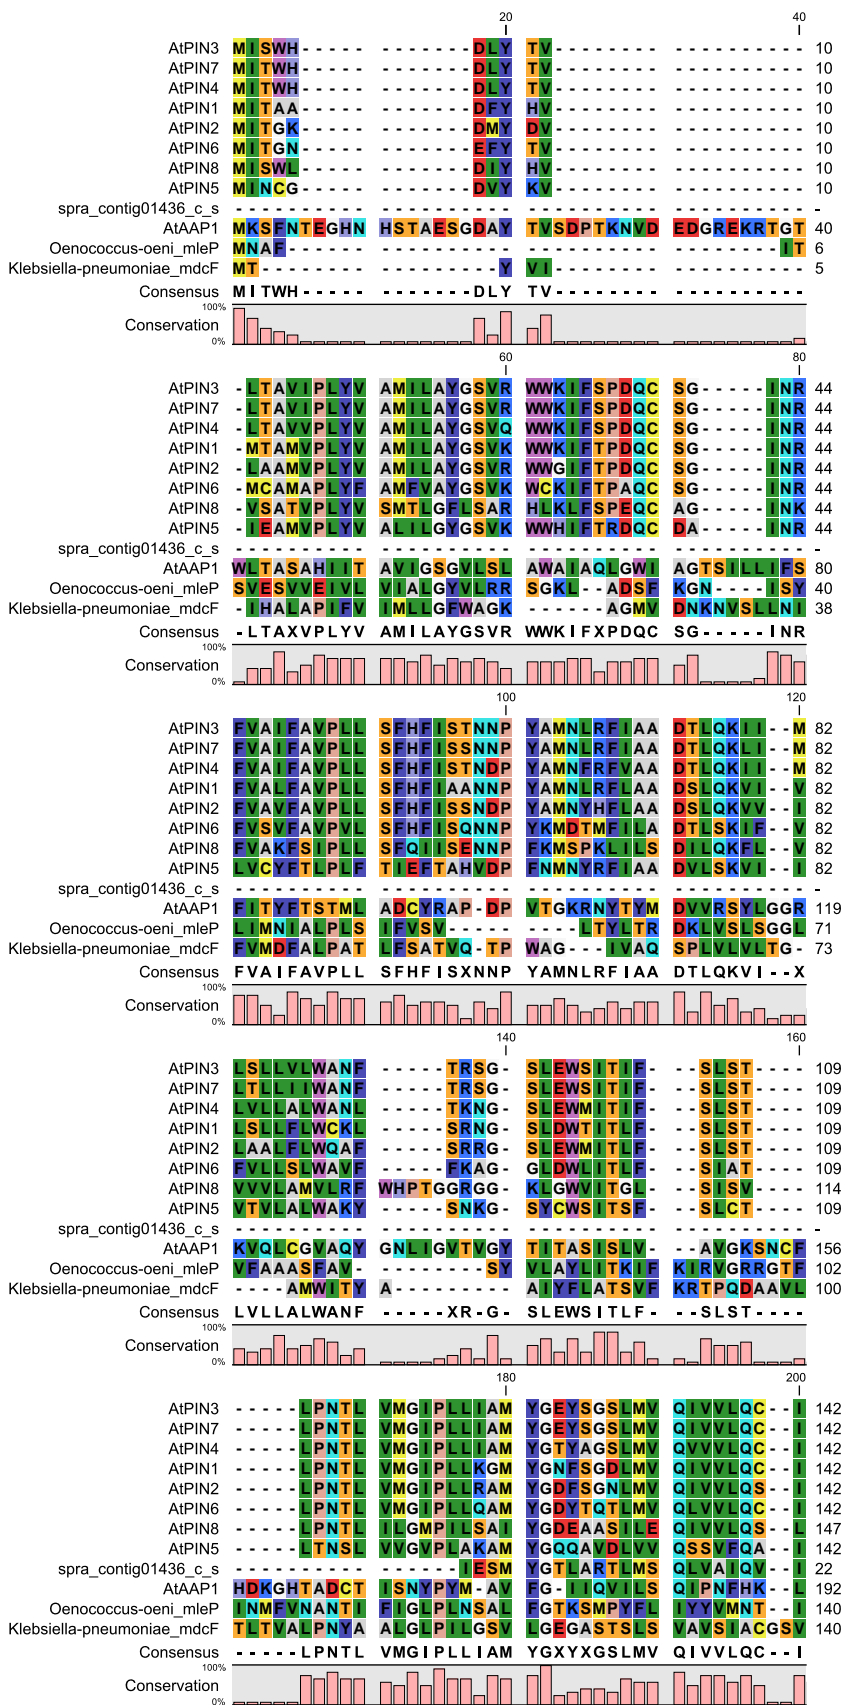

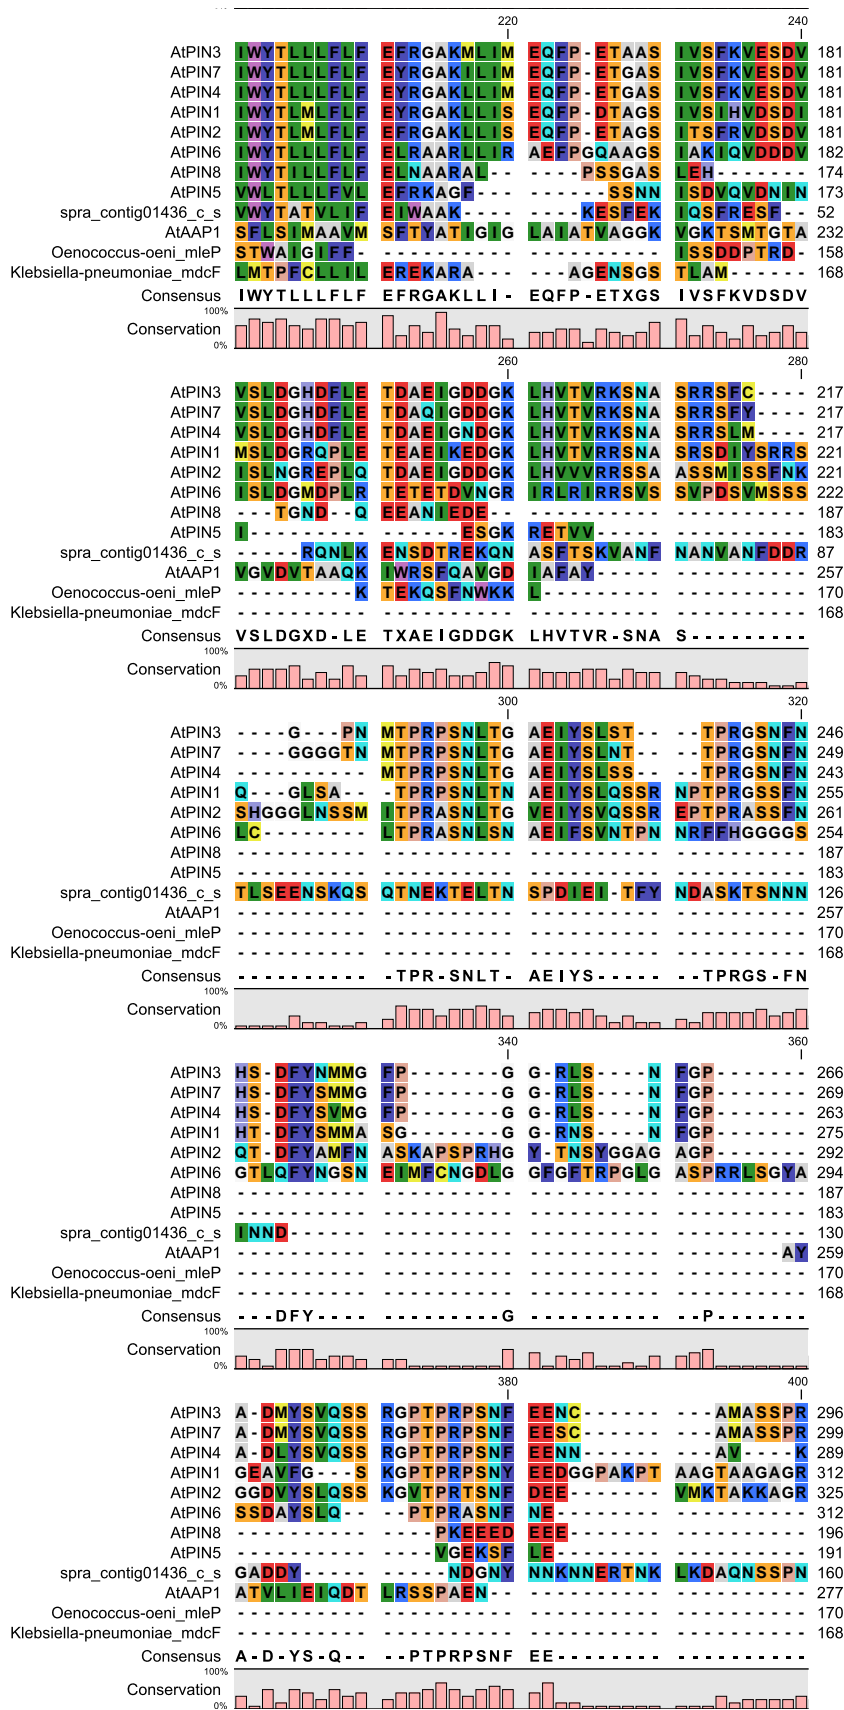



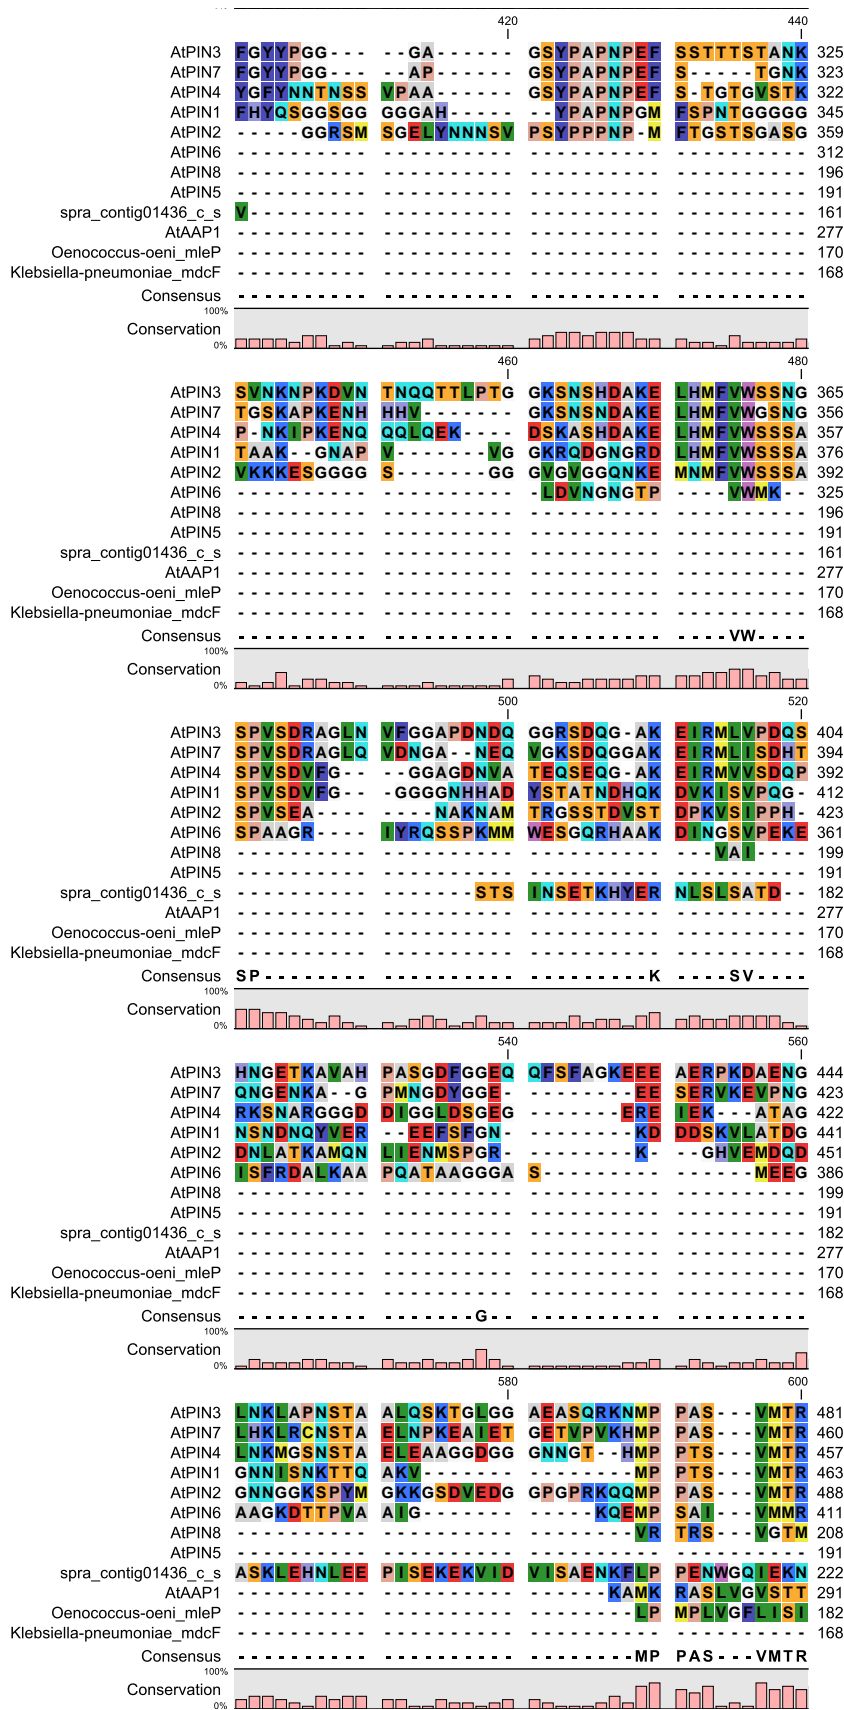

620 640

AtPIN3 L - - - - I L I M V W R K L I R N - P N T Y S S L I G L I - - - W A - - - - 507  
 AtPIN7 L - - - - I L I M V W R K L I R N - P N T Y S S L I G L I - - - W A - - - - 486  
 AtPIN4 L - - - - I L I M V W R K L I R N - P N T Y S S L I G L I - - - W A - - - - 483  
 AtPIN1 L - - - - I L I M V W R K L I R N - P N S Y S S L F G I T - - - W S - - - - 489  
 AtPIN2 L - - - - I L I M V W R K L I R N - P N T Y S S L F G I A - - - W S - - - - 514  
 AtPIN6 L - - - - I L T V V G R K L S R N - P N T Y S S L G L V L - - - W S - - - - 437  
 AtPIN8 K - - - - I L L K A W R K L I I N - P N T Y A T L I G I I - - - W A - - - - 234  
 AtPIN5 - - - - - V M S L V W L K L A T N - P N C Y S C I L G I A - - - W A - - - - 216  
 spr\_a\_contig01436\_c\_s L E K E F Q V G T I L F R K L V A N - P S L H S S L Y G V I - - - Y S - - - - 253  
 AtAAP1 T F F Y I L C G C I G Y A A F G N N A P G D F L T D F G F F E P E W L I D F A N 331  
 Oenococcus-oeni\_mleP V V L L L A I P I P G W - - - - - V S T T F S M V G G I V T P M - - - - - 209  
 Klebsiella-pneumoniae\_mdCF - - - - - P V L M W R S V - - - K K P I V W G P L G W - - - - - 189

Consensus L - - - - I L I M V W R K L I R N - P N T Y S S L I G L I - - - W A - - - -

Conservation 100% 0%

660 680

AtPIN3 - - - - L V A F R W H V A M P - - K I I Q Q S I S - - - - I L S D A 531  
 AtPIN7 - - - - L V A F R W D V A M P - - K I I Q Q S I S - - - - I L S D A 510  
 AtPIN4 - - - - L V A Y R W H V A M P - - K I I Q Q S I S - - - - I L S D A 507  
 AtPIN1 - - - - L I S F K W N I E M P - - A L I A K S I S - - - - I L S D A 513  
 AtPIN2 - - - - L V S F K W N I K M P - - T I M S G S I S - - - - I L S D A 538  
 AtPIN6 - - - - L I S F K W N I P M P - - N I V D F S I K - - - - I L S D A 461  
 AtPIN8 - - - - T L H F R L G W N L P - - E M I D K S I H - - - - L L S D G 258  
 AtPIN5 - - - - F I S N R W H L E L P - - G I L E G S I L - - - - I M S K A 240  
 spr\_a\_contig01436\_c\_s - - - - L I A F G F D F K M P - - L L L K N N L D - - - - I I A N T 277  
 AtAAP1 A C I A V H L I G A Y Q V F A Q P I F Q F Y E K K C N R N Y P D N K F I T S E Y 371  
 Oenococcus-oeni\_mleP - - - - - S - - - - - S L I Y I G I - - - - - I L A D A 221  
 Klebsiella-pneumoniae\_mdCF - - - - - V L S A I G I K M P D L L L A S - - - - - I K P 209

Consensus - - - - L X X F R W X I A M P - - K I I Q X S I S - - - - I L S D A

Conservation 100% 0%

700 720

AtPIN3 G L G - - - M A M F S L G L F - M A L Q P K L I A C G N S V A T F A M A V R F L 567  
 AtPIN7 G L G - - - M A M F S L G L F - M A L Q P K L I A C G N S T A T F A M A V R F F 546  
 AtPIN4 G L G - - - M A M F S L G L F - M A L Q P K I I A C G N S V A T F A M A V R F I 543  
 AtPIN1 G L G - - - M A M F S L G L F - M A L N P R I I A C G N R R A A F A A A M R F V 549  
 AtPIN2 G L G - - - M A M F S L G L F - M A L Q P K I I A C G K S V A G F A M A V R F L 574  
 AtPIN6 G L G - - - M A M F S L G L F - M A L Q P K M P C G A K K A T M G M L I R F I 497  
 AtPIN8 G L G - - - M A M F S L G L F - M A S Q S S T I A C G T K M A I I T M L K F V 294  
 AtPIN5 G T G - - - T A M F N M G I F - M A L Q E K L I V C G T S L T V M G M V L K F I 276  
 spr\_a\_contig01436\_c\_s G M G - - - M A M F S L G L F - I A S P R N F E S C G W R V T W T M M I R L L 313  
 AtAAP1 S V N V P F L G K E N I S L E R L V W R T A Y V V I T T V V A M I F P F F N A I 411  
 Oenococcus-oeni\_mleP G L K S I H F D R D S I - - - - - - - - - - - I A L I G R F I 241  
 Klebsiella-pneumoniae\_mdCF G L A A T A A A L F L T G V I L S A R K L Q L - - - - N A L I A T S T I V K L L 245

Consensus G L G - - - M A M F S L G L F - M A L Q P K X I A C G N S V A T F A M A V R F I

Conservation 100% 0%

740 760

AtPIN3 T G P A V M A V A A I A I G L R G D L L R V A - - I V Q A A L P Q - G I V P F V 604  
 AtPIN7 T G P A V M A V A A M A I G L R G D L L R V A - - I V Q A A L P Q - G I V P F V 583  
 AtPIN4 T G P A V M A V A G I A I G L H G D L L R T A - - I V Q A A L P Q - G I V P F V 580  
 AtPIN1 V G P A V M L V A S Y A V G L R G V L L H V A - - I I Q A A L P Q - G I V P F V 586  
 AtPIN2 T G P A V I A A T S I A I G L R G D L L H I A - - I V Q A A L P Q - G I V P F V 611  
 AtPIN6 S G P L F M A G A S L L V G L R G S R L H A A - - I V Q A A L P Q - G I V P F V 534  
 AtPIN8 L G P A L M I A S A Y C I R L K S T L F K V A - - I I Q A A L P Q - G V V P F V 331  
 AtPIN5 A G P A A M A I G S I V L G L H G D V L R V A - - I I Q A A L P Q - S I T S F I 313  
 spr\_a\_contig01436\_c\_s A C P V I T A A F S Y A L A L H G R V L Y I S - - I I Q G A L P Q - A V L S F V 350  
 AtAAP1 L G - L I G A A S F W P L T V Y F P V - E M H - - I A Q T K I K K - Y S A R W I 446  
 Oenococcus-oeni\_mleP I V P A V M I I L K L F G G S M P K L E S S T L I I Q A A A P G I A V L P I L 281  
 Klebsiella-pneumoniae\_mdCF V Q P F I A W G L V M L L G L H G S I A I T A L M A A A A G F F G V - - - V 282

Consensus T G P A V M A X A S I A I G L R G D L L R V A - - I V Q A A L P Q - G I V P F V

Conservation 100% 0%

780 800

AtPIN3 F A K E Y N - - - V H P A I L S T G V I F G M L I A L P I T L V Y Y I L L G - L 640  
 AtPIN7 F A K E Y N - - - V H P A I L S T G V I F G M L I A L P I T L V Y Y I L L G - L 619  
 AtPIN4 F A K E Y N - - - V H P T I L S T G V I F G M L I A L P I T L V Y Y I L L G - L 616  
 AtPIN1 F A K E Y N - - - V H P D I L S T A V I F G M L I A L P I T L L Y Y I L L G - L 622  
 AtPIN2 F A K E Y N - - - V H P D I L S T A V I F G M L V A L P V T L V Y Y I L L G - L 647  
 AtPIN6 F A R E Y N - - - L H P D L L S T L V I F G M I V S L P V T I L Y Y V L L G - L 570  
 AtPIN8 F A K E Y N - - - L H P E I I S T G V I F G M L I A L P T T L A Y Y F L L D - L 367  
 AtPIN5 F A K E Y G - - - L H A D V L S T A V I F G M L V S L P V L V A Y Y A A L E - F 349  
 spr\_a\_contig01436\_c\_s L S N E Y K - - - I H P E I H T A L I V V T T G L C F P L M L M Y M A F E - - 385  
 AtAAP1 A L K T M C - - - Y V C L I V S L L A A A G S I A G L I S S V K T Y K P F R T M 483  
 Oenococcus-oeni\_mleP V G Q N H G D V E Y A T N V V T T S T V L - F V I V V P I L M Q F V - - - - - 314  
 Klebsiella-pneumoniae\_mdCF F G N R E G V Q S P D A E A V L L L S S V L C I L S L P L F I S L T S G - - - 319

Consensus F A K E Y N - - - V H P D I L S T X V I F G M L I A L P I T L L Y Y I L L G - L

Conservation 100% 0%

---

|                             |    |           |     |
|-----------------------------|----|-----------|-----|
|                             |    | <b>H</b>  | 319 |
| AtPIN3                      | -- |           | 640 |
| AtPIN7                      | -- |           | 619 |
| AtPIN4                      | -- |           | 616 |
| AtPIN1                      | -- |           | 622 |
| AtPIN2                      | -- |           | 647 |
| AtPIN6                      | -- |           | 570 |
| AtPIN8                      | -- |           | 367 |
| AtPIN5                      | -- | <b>LH</b> | 351 |
| spra_contig01436_c_s        | -- | <b>SL</b> | 387 |
| AtAAP1                      | -- | <b>HE</b> | 485 |
| Oenococcus-oeni_mleP        | -- |           | 314 |
| Klebsiella-pneumoniae_mdclF | -- |           | 319 |
| Consensus                   | -- |           |     |
| Conservation                | -- |           |     |
|                             |    | 100%      |     |
|                             |    | 0%        |     |

Figure S23 – alignment of AUX1-LAXs and putative orthologs

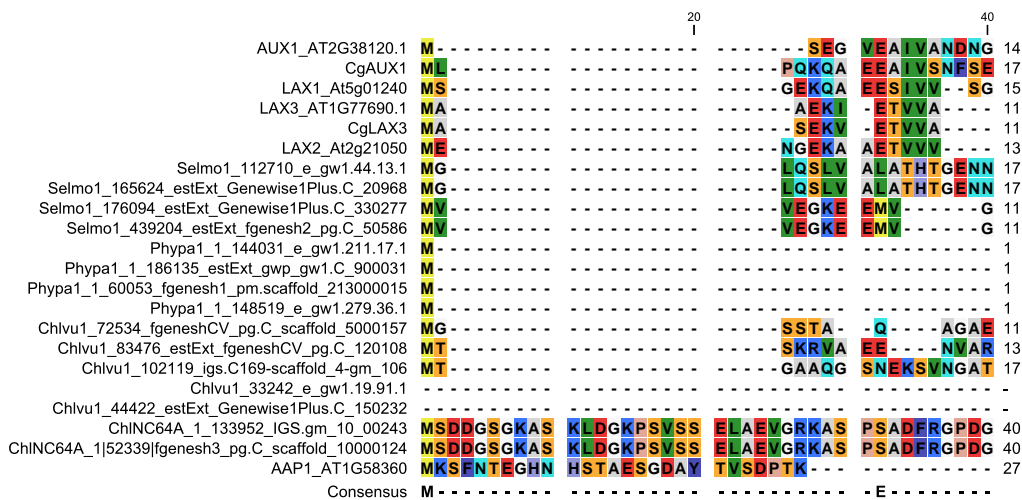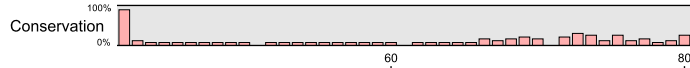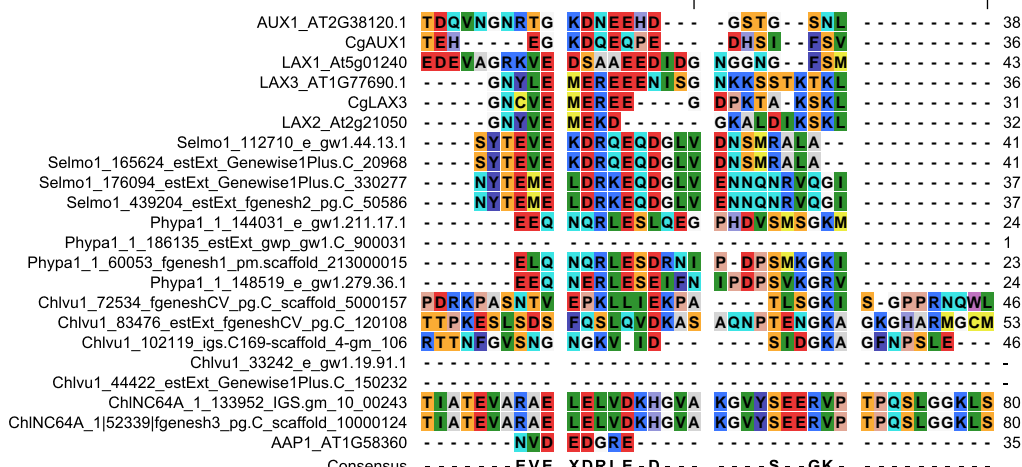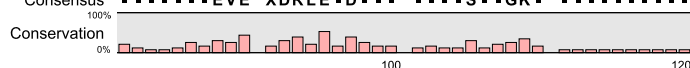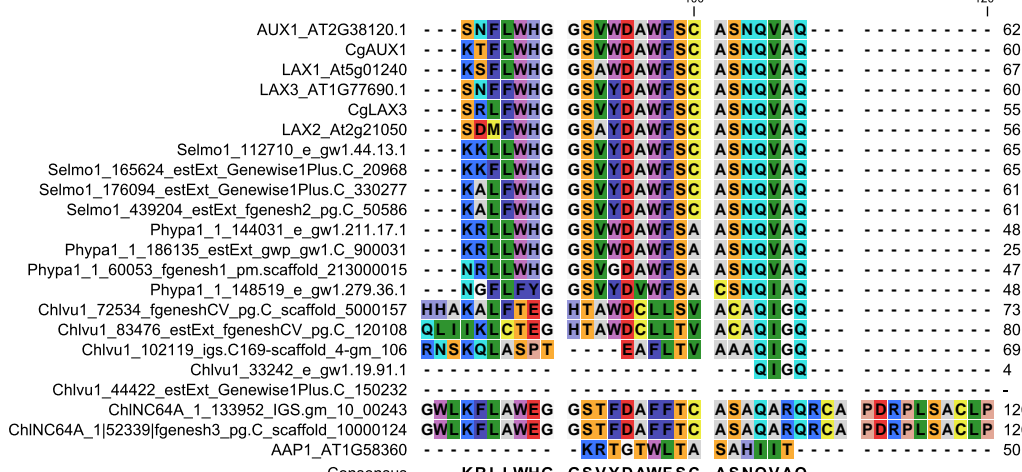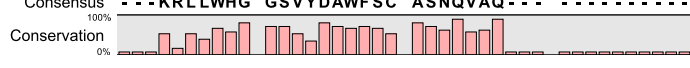

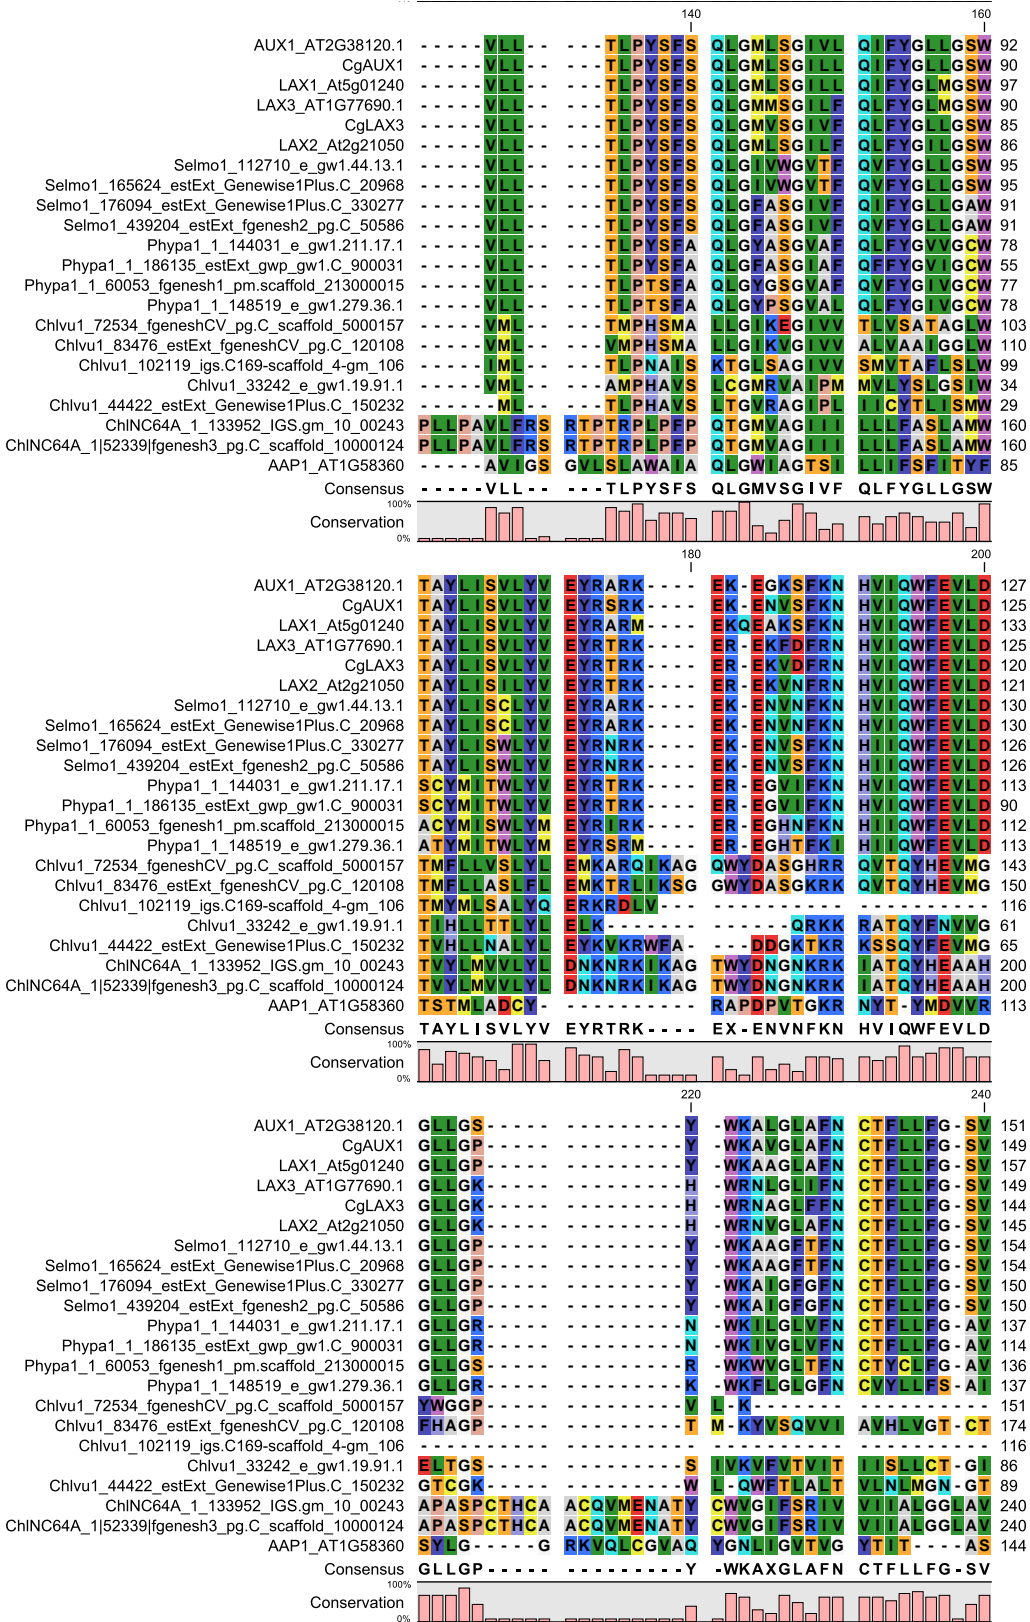

260 280

AUX1\_AT2G38120.1 IQL IACA-SN IYY-----IN DHLDKRWTY IFGA-CCATT 184  
 CgAUX1 IQL IACA-SN IYY-----IN DNLDKRWTY IFGA-CCATT 182  
 LAX1\_At5g01240 IQL IACA-SN IYY-----IN DRLDKRWTY IFGA-CCATT 190  
 LAX3\_AT1G77690.1 IQL IACA-SN IYY-----IN DKLDKRWTY IFGA-CCATT 182  
 CgLAX3 IQL IACA-SN IYY-----IN DNLDKRWTY IFGA-CCATT 177  
 LAX2\_At2g21050 IQL IACA-SN IYY-----IN DNLDKRWTY IFGA-CCATT 178  
 Selmo1\_112710\_e\_gw1.44.13.1 IQL IACG-SN IYY-----IS DRFDKRTWT I IFGA-CCMTT 187  
 Selmo1\_165624\_estExt\_Genewise1Plus.C\_20968 IQL IACG-SN IYY-----IS DRFDKRTWT I IFGA-CCMTT 187  
 Selmo1\_176094\_estExt\_Genewise1Plus.C\_330277 IQL IACA-SN IYY-----IN DLSLKRWTY IFGA-CCMTT 183  
 Selmo1\_439204\_estExt\_fgenes2\_pg.C\_50586 IQL IACA-SN IYY-----IN DLSLKRWTY IFGA-CCMTT 183  
 Phypa1\_1\_144031\_e\_gw1.211.17.1 IQL IACA-SN IFL-----IN DHLNKRWTY IFGA-CCMLT 170  
 Phypa1\_1\_186135\_estExt\_gwp\_gw1.C\_900031 IQL IACA-SN IFL-----IN DHLNKRWTY IFGA-CCMLT 147  
 Phypa1\_1\_60053\_fgenes1\_pm.scaffold\_213000015 IQL IACA-SN TFL-----IN DHLNKRWTY IFGA-VSMLT 169  
 Phypa1\_1\_148519\_e\_gw1.279.36.1 TQL IACG-SN IFL-----LN DNLNKRWTY IFGA-CCVLT 170  
 ChlVu1\_72534\_fgenes3\_pg.C\_scaffold\_5000157 ----- F YAL VWGGV L-MVF 164  
 ChlVu1\_83476\_estExt\_fgenesCV\_pg.C\_120108 AQL IACA-GN NYS-----IT MTHDKRFTL VWGAV L-MCF 207  
 ChlVu1\_102119\_igs.C169-scaffold\_4-gm\_106 --- IACA-GD MYY-----ID KSYSKRTEY L FGSV L-MLF 146  
 ChlVu1\_33242\_e\_gw1.19.91.1 AQL VAI A-TG SYY-----LN TSDKRWT L WGG ILSV TM 120  
 ChlVu1\_44422\_estExt\_Genewise1Plus.C\_150232 AQL IYAGA-AN TYF-----IN PVLTKRGTW L VWGA-LSL LM 122  
 ChINC64A\_1\_133952\_IGS.gm\_10\_00243 AQL IASS-SN FHR-----M PALSKRSWAL VEGGV-AMLM 273  
 ChINC64A\_1\_152339\_fgenes3\_pg.C\_scaffold\_10000124 AQL IASS-SN FHR-----M PALSKRSWAL VEGGV-AMLM 273  
 AAP1\_AT1G58360 ISL IAVGKSN CFHDKGHTAD CTISNYPYMA VEG-ITQVIL 183

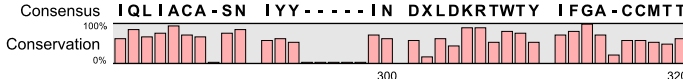

300 320

AUX1\_AT2G38120.1 VFI PSFHNYR IWSF LGL GMT -TYTAWY - - L A I A S I H G Q A 221  
 CgAUX1 VFI PSFHNYR IWSF LGL GMT -TYTAWY - - M A I A A L H G Q V 219  
 LAX1\_At5g01240 VFI PSFHNYR IWSF LGL GMT -TYTAWY - - L T I A S F L H G Q A 227  
 LAX3\_AT1G77690.1 VFI PSFHNYR IWSF LGL AMT -TYTSWY - - L T I A S L L H G Q A 219  
 CgLAX3 VFI PSFHNYR IWSF LGL YMT -TYTAWY - - L A I A S L I H G Q V 214  
 LAX2\_At2g21050 VFI PSFHNYR IWSF LGL MTT -TYTAWY - - L T I A S I L H G Q V 215  
 Selmo1\_112710\_e\_gw1.44.13.1 VLV PSFHNYR IWSF LGL GMT -TYTAWY - - M T I T A L V H G K D 224  
 Selmo1\_165624\_estExt\_Genewise1Plus.C\_20968 VLV PSFHNYR IWSF LGL GMT -TYTAWY - - M T I T A L V H G K D 224  
 Selmo1\_176094\_estExt\_Genewise1Plus.C\_330277 VLI PSFHNYR IWSF LGL GMT -TYTAWY - - M T I A A I V H G Q A 220  
 Selmo1\_439204\_estExt\_fgenes2\_pg.C\_50586 VLI PSFHNYR IWSF LGL GMT -TYTAWY - - M T I A A I V H G Q A 220  
 Phypa1\_1\_144031\_e\_gw1.211.17.1 VLV PSFRNYR LWSFFGL IMI -SYTAWY - - M T I A A L A H G Q V 207  
 Phypa1\_1\_186135\_estExt\_gwp\_gw1.C\_900031 VLV PSFRNYR LWSFFGL IMI -SYTAWY - - M T I A A L A H G Q V 184  
 Phypa1\_1\_60053\_fgenes1\_pm.scaffold\_213000015 IFI PSFKNYR IWSFFGL IMI -TYTAWY - - M T I A S I I Y G Q T 206  
 Phypa1\_1\_148519\_e\_gw1.279.36.1 IFI PSFRNYR LWSFFGVVT -TYTSWY - - M T V A A L F Y G Q A 207  
 ChlVu1\_72534\_fgenesCV\_pg.C\_scaffold\_5000157 T F V P S F R H F R V I N I A L V G T - A Y T A W - - - - - 189  
 ChlVu1\_83476\_estExt\_fgenesCV\_pg.C\_120108 S F V P T F R H F R I I N I V A L I G T - C Y T E W F - - L V A V S A Q K G I T 244  
 ChlVu1\_102119\_igs.C169-scaffold\_4-gm\_106 A F V P T F R H F R V L N V I A L F G T - S F T A L F - - I L V E A G K K G L Q 183  
 ChlVu1\_33242\_e\_gw1.19.91.1 S L V P N F R H F R L L N V I S L V G T - A Y T A V Y - - L I A T A A S T G L P 157  
 ChlVu1\_44422\_estExt\_Genewise1Plus.C\_150232 T L P T F R D F R L L N V I A I A G T - G F T A V Y - - I W I E C H Y H G F T 159  
 ChINC64A\_1\_133952\_IGS.gm\_10\_00243 S L I P S F R N F R I F S F I A L V A T - T F T A W Y - - M V A M G I I G Y N D 310  
 ChINC64A\_1\_152339\_fgenes3\_pg.C\_scaffold\_10000124 S L I P S F R N F R I F S F I A L V A T - T F T A W Y - - M V A M G I I G Y N D 310  
 AAP1\_AT1G58360 S Q I P N F H K L S F L S I M A A V M S F T Y A T I G L G M A I A T V A G G K V 223

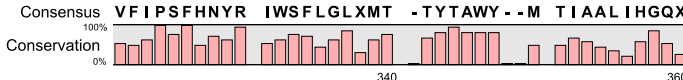

340 360

AUX1\_AT2G38120.1 EG - - V - - - KH - - - - SGPTKL VLYFTGATNI LYTFGGHAVT 252  
 CgAUX1 EN - - V - - - QH - - - - TAPSKL VLYFTGATNI LYTFGGHAVT 250  
 LAX1\_At5g01240 EG - - V - - - TH - - - - SGPTKL VLYFTGATNI LYTFGGHAVT 258  
 LAX3\_AT1G77690.1 ED - - V - - - KH - - - - SGPTTM VLYFTGATNI LYTFGGHAVT 250  
 CgLAX3 EG - - V - - - KH - - - - SGPTTM VLYFTGATNI LYTFGGHAVT 245  
 LAX2\_At2g21050 EG - - V - - - KH - - - - SGPSKL VLYFTGATNI LYTFGGHAVT 246  
 Selmo1\_112710\_e\_gw1.44.13.1 PG - - V - - - KH - - - - SAPNNL VQYFTGATNI LYTFGGHAVT 255  
 Selmo1\_165624\_estExt\_Genewise1Plus.C\_20968 PG - - V - - - KH - - - - SAPNNL VQYFTGATNI LYTFGGHAVT 255  
 Selmo1\_176094\_estExt\_Genewise1Plus.C\_330277 DN - - V - - - KH - - - - TGASKL VLYFTGATNI LYTFGGHAVT 251  
 Selmo1\_439204\_estExt\_fgenes2\_pg.C\_50586 DN - - V - - - KH - - - - TGASKL VLYFTGATNI LYTFGGHAVT 251  
 Phypa1\_1\_144031\_e\_gw1.211.17.1 AN - - V - - - VH - - - - TAPTTK VLYFTGATNI LYTFGGHAVT 238  
 Phypa1\_1\_186135\_estExt\_gwp\_gw1.C\_900031 AN - - V - - - VH - - - - SAPTTK VLYFTGATNI LYTFGGHAVT 215  
 Phypa1\_1\_60053\_fgenes1\_pm.scaffold\_213000015 SG - - V - - - TH - - - - NGPVSR VLYFTGATNI LYTFGGHAVT 237  
 Phypa1\_1\_148519\_e\_gw1.279.36.1 PG - - A - - - TH - - - - DGPNSL VLYFTGATNI LYTFGGHAVT 238  
 ChlVu1\_72534\_fgenesCV\_pg.C\_scaffold\_5000157 ----- PHKNA QDFFVGA AVL GE F - - GHPIA 212  
 ChlVu1\_83476\_estExt\_fgenesCV\_pg.C\_120108 PG - - A - - - ID - - - - RSYRNA QDFF IGA AVL GQ F - - GHST A 273  
 ChlVu1\_102119\_igs.C169-scaffold\_4-gm\_106 PG - - A - - - AL - - - - TKPVSA QAFF LGTSVQ MQAMGAHGT A 214  
 ChlVu1\_33242\_e\_gw1.19.91.1 QAS V A - - - LT - - - - AGPLKA QNVFLGANVF MSGFGGHSMS 190  
 ChlVu1\_44422\_estExt\_Genewise1Plus.C\_150232 PG - - A - - - AN - - - - LAPYNI QSFFTGANVF LWAYGGHGS 190  
 ChINC64A\_1\_133952\_IGS.gm\_10\_00243 EG L Q S V A W T D - - - - QTPPSL D G F F A G A S N I I F T F G G H A M L 346  
 ChINC64A\_1\_152339\_fgenes3\_pg.C\_scaffold\_10000124 EG L Q S V A W T D - - - - QTPPSL D G F F A G A S N I I F T F G G H A M L 346  
 AAP1\_AT1G58360 G K T S M T G T A V G V D V T A A Q K I W R S F Q A M G D I A F A A Y A T V L 263

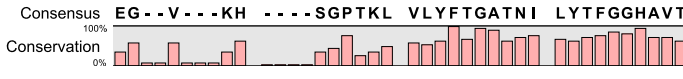

|                                                   | 380        | 400        |                           |
|---------------------------------------------------|------------|------------|---------------------------|
| AUX1_AT2G38120.1                                  | VEIMHAMWK  | PQKFKYIYLM | ATLYVFTLTI PSAAA--VYW 289 |
| CgAUX1                                            | VEIMHAMWK  | PQKFKYIYLM | ATLYVFTLTI PSAAS--VYW 287 |
| LAX1_At5g01240                                    | VEIMHAMWK  | PRKFKSIYLM | ATLYVFTLTI PSASA--VYW 295 |
| LAX3_AT1G77690.1                                  | VEIMHAMWK  | PQKFKAIYLI | ATLYVLTITL PSASA--VYW 287 |
| CgLAX3                                            | VEIMHAMWK  | PQKFKMIYLI | ATLYVLTITL PSASA--VYW 282 |
| LAX2_At2g21050                                    | VEIMHAMWK  | PQKFKSIYLF | ATLYVLTITL PSASA--VYW 283 |
| Selmo1_112710_e_gw1.44.13.1                       | VEIMHAMWK  | PSKFKSYLFL | STLYVLTITL PSATA--VYW 292 |
| Selmo1_165624_estExt_Genewise1Plus.C_20968        | VEIMHAMWK  | PSKFKSYLFL | STLYVLTITL PSATA--VYW 292 |
| Selmo1_176094_estExt_Genewise1Plus.C_330277       | VEIMHAMWK  | PQKFKWVYLV | ATLYVFTLTI PSATA--VYW 288 |
| Selmo1_439204_estExt_fgenesh2_pg.C_50586          | VEIMHAMWK  | PQKFKWVYLV | ATLYVFTLTI PSATA--VYW 288 |
| Phypa1_1_144031_e_gw1.211.17.1                    | VEIMHAMWK  | PVKFKYVYVL | ATLYVFTLTI PSAVA--VYW 275 |
| Phypa1_1_186135_estExt_gwp_gw1.C_900031           | VEIMHAMWK  | PVRKFKVYVF | ATLYVFTLTI PSAVA--VYW 252 |
| Phypa1_1_60053_fgenesh1_pm.scaffold_213000015     | VEIMHAMWK  | PSKFKYVFL  | ATLYVFTLTI PSAVA--VYW 274 |
| Phypa1_1_148519_e_gw1.279.36.1                    | VEIMHAMWK  | PVKFKYVYLF | ATLYVFTLTI PSAVA--VYW 275 |
| ChlVu1_72534_fgeneshCV_pg.C_scaffold_5000157      | LEMA-----  | -----      | ----- 216                 |
| ChlVu1_83476_estExt_fgeneshCV_pg.C_120108         | LEMAADAMRN | AHFHQAAYTA | GWLVLTLL PHSIA--ANL 310   |
| ChlVu1_102119_igs.C169-scaffold_4-gm_106          | LEMHADAMQD | SSRYVAAYFG | GWVLTLLTM PHSIA--MNL 251  |
| ChlVu1_33242_e_gw1.19.91.1                        | FEVLDALFN  | PGCYDTVYYP | SYLFTWVYTI PHSLL--AQL 227 |
| ChlVu1_44422_estExt_Genewise1Plus.C_150232        | FEVLDAMWA  | PSKYDLYYPL | SYLFTFTIAA PHSML--VQL 227 |
| ChlNC64A_1_133952_IGS.gm_10_00243                 | LEVMDSMFR  | PFKFKVYFVW | SYNYVYTLVM PMSVF--LYW 383 |
| ChlNC64A_1_152339_fgenesh3_pg.C_scaffold_10000124 | LEVMDSMFR  | PFKFKVYFVW | SYNYVYTLVM PMSVF--LYW 383 |
| AAP1_AT1G58360                                    | VEIQDTRLSS | PAENKAMKRA | SLVGVSTTTF FYILCGCGY 303  |
| Consensus                                         | VEIMHAMWK  | PQKFKYVYLF | ATLYVFTLTI PSAVA--VYW     |

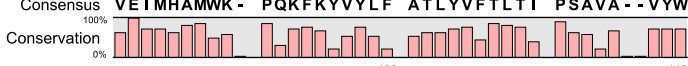

|                                                   | 420         | 440        |                           |
|---------------------------------------------------|-------------|------------|---------------------------|
| AUX1_AT2G38120.1                                  | A--FGDALLD  | HSNAFSLMPK | NAWRDAAVIL MLIHQFITFG 327 |
| CgAUX1                                            | A--FGDELLN  | HSNAFSLLPK | NGFRDAAVIL MLIHQFITFG 325 |
| LAX1_At5g01240                                    | A--FGDQLLN  | HSNAFSLLPK | TRFRDAAVIL MLIHQFITFG 333 |
| LAX3_AT1G77690.1                                  | A--FGDKLLT  | HSNALSLLPK | TGFRDAAVIL MLIHQFITFG 325 |
| CgLAX3                                            | A--FGDMLLT  | HSNALSLLPK | SGFRDAAVYL MLIHQFITFG 320 |
| LAX2_At2g21050                                    | A--FGDLLLN  | HSNAFALLPK | NLYRDAVYVL MLIHQFITFG 321 |
| Selmo1_112710_e_gw1.44.13.1                       | A--FGDELLH  | NGNALSLLPK | NVFRDAVYVL MLIHQFITFG 330 |
| Selmo1_165624_estExt_Genewise1Plus.C_20968        | A--FGDELLH  | NGNALSLLPK | NVFRDAVYVL MLIHQFITFG 330 |
| Selmo1_176094_estExt_Genewise1Plus.C_330277       | A--FGDNLLT  | KSNALSLLPK | NAFRDIA--- ----FITFG 319  |
| Selmo1_439204_estExt_fgenesh2_pg.C_50586          | A--FGDNLLT  | KSNALSLLPK | NAFRDIA--- ----FITFG 318  |
| Phypa1_1_144031_e_gw1.211.17.1                    | A--FGDDLK   | HSNALSLLPK | TMARDVAVYL MLIHQFITVG 313 |
| Phypa1_1_186135_estExt_gwp_gw1.C_900031           | A--FGDDLK   | HSNALSLLPK | TMARDVAVYL MLIHQFITVG 290 |
| Phypa1_1_60053_fgenesh1_pm.scaffold_213000015     | A--FGDTLLT  | HANALSLLPK | SAARDVAVYL MLIHQFITVG 312 |
| Phypa1_1_148519_e_gw1.279.36.1                    | A--FGDSLVL  | NANALSLLPK | SAARDVAVYL MLIHQFITVG 313 |
| ChlVu1_72534_fgeneshCV_pg.C_scaffold_5000157      | -----       | -DNLYSVLPY | SLWKVLSVWL MNHQLVAFS 245  |
| ChlVu1_83476_estExt_fgeneshCV_pg.C_120108         | A--WPDEVYI  | QDNIFNVIPI | SPGKYSVWL MNHQQVAFG 348   |
| ChlVu1_102119_igs.C169-scaffold_4-gm_106          | A--WPKLITIT | NDNVYGVLPK | SNAMRSLVWL MLIHQFVAFA 289 |
| ChlVu1_33242_e_gw1.19.91.1                        | A--FPADNAK  | YSNLYGAVPN | NAARNASIVL MLIHQAVAYA 265 |
| ChlVu1_44422_estExt_Genewise1Plus.C_150232        | A--FPTENLA  | QDNVYGVLPK | NGWLVASVIL MLIHQIVAYA 265 |
| ChlNC64A_1_133952_IGS.gm_10_00243                 | GQVWPAAQAEQ | YGNVYGVMPK | SVARDFSVYL MVIHQVIVFG 423 |
| ChlNC64A_1_152339_fgenesh3_pg.C_scaffold_10000124 | GQVWPAAQAEQ | YGNVYGVMPK | SVARDFSVYL MVIHQVIVFG 423 |
| AAP1_AT1G58360                                    | AAFGNAPGD   | FLTDFGFPEP | FWLIDFANAC AVHLIGAYQ 343  |
| Consensus                                         | A--FGDELLT  | HSNALSLLPK | NAXRDXAVVL MLIHQFITFG     |

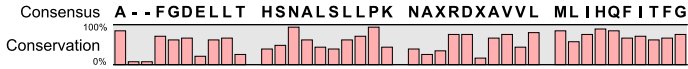

|                                                   | 460        | 480         |                           |
|---------------------------------------------------|------------|-------------|---------------------------|
| AUX1_AT2G38120.1                                  | FACTPLFYVW | EKVI GMH-DT | KSI----- 349              |
| CgAUX1                                            | FACTPLFYVW | EKVI GMH-DT | RSI----- 347              |
| LAX1_At5g01240                                    | FACTPLFYVW | EKAIGMH-HT  | KSI----- 355              |
| LAX3_AT1G77690.1                                  | FASTPLFYVW | EKLIGMH-ET  | KSM----- 347              |
| CgLAX3                                            | FACTPLFYVW | EKFRIH-DT   | KSV----- 342              |
| LAX2_At2g21050                                    | FACTPLFYVW | EKLIGMH-EC  | RSM----- 343              |
| Selmo1_112710_e_gw1.44.13.1                       | FACTPLFYVW | EKIIGMH-RS  | PRF----- 352              |
| Selmo1_165624_estExt_Genewise1Plus.C_20968        | FACTPLFYVW | EKIIGMH-RS  | PRF----- 352              |
| Selmo1_176094_estExt_Genewise1Plus.C_330277       | FACTPLFYVW | EKILGTH-KT  | ANL----- 341              |
| Selmo1_439204_estExt_fgenesh2_pg.C_50586          | FACTPLFYVW | EKILGTH-KT  | ANL----- 340              |
| Phypa1_1_144031_e_gw1.211.17.1                    | FAVTPLYFVW | EKVI GTH-NT | KSL----- 335              |
| Phypa1_1_186135_estExt_gwp_gw1.C_900031           | FAVTPLYFVW | EKMIGTH-NT  | KSL----- 312              |
| Phypa1_1_60053_fgenesh1_pm.scaffold_213000015     | FAVTPLYIMW | EKMLGWH-RS  | RAW----- 335              |
| Phypa1_1_148519_e_gw1.279.36.1                    | FAVTPLYFVW | EKILGTH-NT  | KSL----- 335              |
| ChlVu1_72534_fgeneshCV_pg.C_scaffold_5000157      | LYVPLLFMW  | EKLLRVH--S  | KPW----- 266              |
| ChlVu1_83476_estExt_fgeneshCV_pg.C_120108         | LYSVPLFMW  | EKLIRVH--S  | KPW----- 369              |
| ChlVu1_102119_igs.C169-scaffold_4-gm_106          | LYVTPLLYMI | EKV-----    | ----- 302                 |
| ChlVu1_33242_e_gw1.19.91.1                        | LYVTPVFFMW | EKLVGTH--D  | KPL----- 286              |
| ChlVu1_44422_estExt_Genewise1Plus.C_150232        | LYVTPVFFMW | EKLIGTH--E  | KPN----- 286              |
| ChlNC64A_1_133952_IGS.gm_10_00243                 | LFAFPIYMY  | EKLKVVH--T  | GAY----- 444              |
| ChlNC64A_1_152339_fgenesh3_pg.C_scaffold_10000124 | LFAFPIYMY  | EKLKVVH--T  | GAY----- 444              |
| AAP1_AT1G58360                                    | VFAQPIYQVY | EKKCNRYPD   | NKGI TSEYSV NVPFLGKFN 383 |
| Consensus                                         | FACTPLFYVW | EKLIGVH--T  | KSL-----                  |

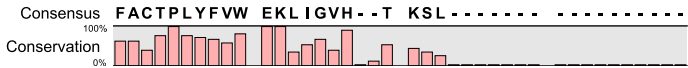



500 520

AUX1\_AT2G38120.1 - **CLRALARLP** **VVIPWF LAI** **IFPFFGPI NS** **AVGALLVSFT** 388  
 CgAUX1 - **CLRALARLP** **VVIPWF LAI** **IFPFFGPI NS** **AVGALLVSFT** 386  
 LAX1\_At5g01240 - **CLRALVRLP** **VVVPWF LAI** **IFPFFGPI NS** **AVGALLVTFT** 394  
 LAX3\_AT1G77690.1 - **FKRAMARLP** **VVVPWF LAI** **IFPFFGPI NS** **AVGSLVSTFT** 386  
 CgLAX3 - **FKRALARLP** **VVIPWF LAI** **IFPFFGPI NS** **TVGSLLVSFT** 381  
 LAX2\_At2g21050 - **CKRAAARLP** **VVIPWF LAI** **IFPFFGPI NS** **TVGSLLVSFT** 382  
 Selmo1\_112710\_e\_gw1.44.13.1 - **LLRAAARLP** **VVIPWFMAV** **IFPFFGPI NS** **AVGSLVSTFT** 391  
 Selmo1\_165624\_estExt\_Genewise1Plus.C\_20968 - **LLRAAARLP** **VVIPWFMAV** **IFPFFGPI NS** **AVGSLVSTFT** 391  
 Selmo1\_176094\_estExt\_Genewise1Plus.C\_330277 - **PVRALARVP** **VVLPWF LAI** **IFPFFGPI NS** **AVGALLVTFT** 380  
 Selmo1\_439204\_estExt\_fgenesh2\_pg.C\_50586 - **PVRALARVP** **VVLPWF LAI** **IFPFFGPI NS** **AVGALLVTFT** 379  
 Phypa1\_1\_144031\_e\_gw1.211.17.1 - **PLRAVCRMP** **VILPVWFFAI** **AFPPFFGPI NS** **TVGA LLVTFT** 374  
 Phypa1\_1\_186135\_estExt\_gwp\_gw1.C\_900031 - **LLRAVSRMP** **VILPVWFFAI** **AFPPFFGPI NS** **TVGA LLVTFT** 351  
 Phypa1\_1\_60053\_fgenesh1\_pm.scaffold\_213000015 - **VVRLCRAP** **VMVPWF FFAI** **AFPPFFGPI NS** **MGALLVTFT** 374  
 Phypa1\_1\_148519\_e\_gw1.279.36.1 - **LLRATCRVP** **VILPVWFFAI** **AFPPFFGPI NS** **VGCLLVSTFT** 374  
 Chlvu1\_72534\_fgeneshCV\_pg.C\_scaffold\_5000157 - **YIRLPLRLP** **VSLALYLIGV** **AFPPFYGTINS** **LYKALAEPLT** 305  
 Chlvu1\_83476\_estExt\_fgeneshCV\_pg.C\_120108 - **YIRLPLRLP** **ISGLLYVISI** **AFPPFYGTINS** **LYSSLSEPLT** 408  
 Chlvu1\_102119\_igs.C169-scaffold\_4-gm\_106 - **PL** **VIFFLVG** **AFPPFYGTINS** **MGALISVPTT** 331  
 Chlvu1\_33242\_e\_gw1.19.91.1 - **WIRLPSRLP** **VALLVWFFAL** **IFPFFDTINA** **VQGA VGYSTT** 325  
 Chlvu1\_44422\_estExt\_Genewise1Plus.C\_150232 - **WIRLPSRLP** **VALLVWFFAI** **AFPPFYGTINS** **ILGALTGSMV** 325  
 ChINC64A\_1\_133952\_IGS.gm\_10\_00243 - **WKRACRVP** **VGLLWLI AL** **AFPPFFGVIND** **LGAF TTTTFF** 483  
 ChINC64A\_1\_152339|fgenesh3\_pg.C\_scaffold\_10000124 - **WKRACRVP** **VGLLWLI AL** **AFPPFFGVIND** **LGAF TTTTFF** 483  
 AAP1\_AT1G58360 - **SLFRLVWRTA** **VYVITTVVAM** **IFPFFFNAL LG** **LGAA - ASFW** 421

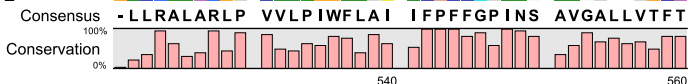

540 560

AUX1\_AT2G38120.1 V - - - **YIIPSL** **AHMLTY** - - - **R** **SASARQNAAE** **KPP** - - - - - 415  
 CgAUX1 V - - - **YIIPSL** **AHMLTY** - - - **R** **KASARQNAAE** **KPP** - - - - - 413  
 LAX1\_At5g01240 V - - - **YIIPAL** **AHMLTY** - - - **R** **TASARRNAAE** **KPP** - - - - - 421  
 LAX3\_AT1G77690.1 V - - - **YIIPAL** **AHMLTF** - - - **A** **PAPSRENAVE** **RPP** - - - - - 413  
 CgLAX3 V - - - **YIIPAL** **AHMLTF** - - - **A** **SASARENAVE** **RPP** - - - - - 408  
 LAX2\_At2g21050 V - - - **YIIPAL** **AHIFTF** - - - **R** **SSAARENAVE** **QPP** - - - - - 409  
 Selmo1\_112710\_e\_gw1.44.13.1 V - - - **YIIPCL** **AHMLTF** - - - **R** **TAFARENAVE** **KPP** - - - - - 418  
 Selmo1\_165624\_estExt\_Genewise1Plus.C\_20968 V - - - **YIIPCL** **AHMLTF** - - - **R** **TAFARENAVE** **KPP** - - - - - 418  
 Selmo1\_176094\_estExt\_Genewise1Plus.C\_330277 V - - - **YIIPSL** **AHMLTY** - - - **R** **TAFARANSVE** **KPP** - - - - - 407  
 Selmo1\_439204\_estExt\_fgenesh2\_pg.C\_50586 V - - - **YIIPSL** **AHMLTY** - - - **R** **TAFARANSVE** **KPP** - - - - - 406  
 Phypa1\_1\_144031\_e\_gw1.211.17.1 V - - - **YIIPC** **AHMVYV** - - - **R** **GATARQNAVE** **KPP** - - - - - 401  
 Phypa1\_1\_186135\_estExt\_gwp\_gw1.C\_900031 V - - - **YIIPC** **AHMVYV** - - - **R** **AATARQNAVE** **KPP** - - - - - 378  
 Phypa1\_1\_60053\_fgenesh1\_pm.scaffold\_213000015 V - - - **YIIPC** **AHMAFY** - - - **R** **SAASRQSSVE** **KPP** - - - - - 401  
 Phypa1\_1\_148519\_e\_gw1.279.36.1 V - - - **YIIPC** **AHIVYF** - - - **S** **NSSLRAPSV E** **KPP** - - - - - 401  
 Chlvu1\_72534\_fgeneshCV\_pg.C\_scaffold\_5000157 A - - - **FVFP** **CAVY** **SWVY** - - - **R** **TSPARN** **GAVL** **K** - **PWK** - - - - - 333  
 Chlvu1\_83476\_estExt\_fgeneshCV\_pg.C\_120108 A - - - **FVFP** **CAVY** **IWVY** - - - **H** **TRAARE** **QAAM** **K** - **PFK** - - - - - 436  
 Chlvu1\_102119\_igs.C169-scaffold\_4-gm\_106 S - - - **FVLP** **PAV** **AFN** **WVY** - - - **R** **TEARR** **SSAL** **P** - **PYS** - - - - - 359  
 Chlvu1\_33242\_e\_gw1.19.91.1 A - - - **FVFP** **TA** **AYL** **WVY** - - - **K** **SAKARN** - **NAP** **KVP** - **R** - - - - - 352  
 Chlvu1\_44422\_estExt\_Genewise1Plus.C\_150232 S - - - **FILP** **CA** **AYN** **LYY** - - - **M** **TSKQR** **LAAP** **KQPP** - - - - - 354  
 ChINC64A\_1\_133952\_IGS.gm\_10\_00243 **ARCTFI** **IPCL** **AYN** **IHYQLKK** **NAAQNR** **EST** **KPPSRRGGGM** 523  
 ChINC64A\_1\_152339|fgenesh3\_pg.C\_scaffold\_10000124 **ARCTFI** **IPCL** **AYN** **IHYQLKK** **NAAQNR** **EST** **KPPSRRGGGM** 523  
 AAP1\_AT1G58360 **PLTVY** - **FPVE** **MHIAQTKIKK** **YSAR** - - - - - 444

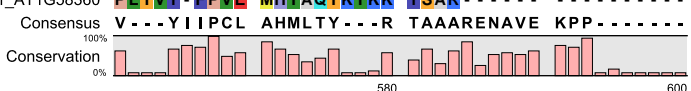

580 600

AUX1\_AT2G38120.1 - - **FFMPSWTA** **MYVLNAE** - **VV** **VWVLIVGFGF** **GGWASVTN FV** 452  
 CgAUX1 - - **FFLPSWTA** **MFVINA E** - **VV** **VWVLIVGFGF** **GGWASMTN FV** 450  
 LAX1\_At5g01240 - - **FFIPSWAG** **VYVINA E** - **IV** **VWVLIVGFGF** **GGWASMTN FV** 458  
 LAX3\_AT1G77690.1 - - **RVVGGW** **MGTYCINTF** - **VV** **VWVFWVGF** **GGWASMVNFV** 450  
 CgLAX3 - - **SFLGGW** **TGSYSVNSF** - **VV** **VWVLIVGFGF** **GGWASMLNFV** 445  
 LAX2\_At2g21050 - - **RFLGRW** **TGAFTINA E** - **IV** **VWVFI VGF** **GGWASMLNFV** 446  
 Selmo1\_112710\_e\_gw1.44.13.1 - - **FIMP** **SWAA** **VYVFNF** - **VV** **VWVFWVGF** **GGWASTVNFV** 455  
 Selmo1\_165624\_estExt\_Genewise1Plus.C\_20968 - - **FIMP** **SWAA** **VYVFNF** - **VV** **VWVFWVGF** **GGWASTVNFV** 455  
 Selmo1\_176094\_estExt\_Genewise1Plus.C\_330277 - - **FFLPSW** **TLYLVNFE** - **IV** **VWIAVIGWGF** **GGWASVTN FV** 444  
 Selmo1\_439204\_estExt\_fgenesh2\_pg.C\_50586 - - **FFLPSW** **TLYLVNFE** - **IV** **VWIAVIGWGF** **GGWASVTN FV** 443  
 Phypa1\_1\_144031\_e\_gw1.211.17.1 - - **FFLPSW** **TLYLVNFE** - **IV** **VWIAVIGWGF** **GGWASVTN FV** 438  
 Phypa1\_1\_186135\_estExt\_gwp\_gw1.C\_900031 - - **FFMPSW** **GVYLVNIF** - **IV** **VWIVIGWGF** **GGWASVTN FV** 415  
 Phypa1\_1\_60053\_fgenesh1\_pm.scaffold\_213000015 - - **RFLPSW** **TLYLVNFE** - **IV** **VWIAVIGWGF** **GGWASVTN FV** 438  
 Phypa1\_1\_148519\_e\_gw1.279.36.1 - - **FFLPTW** **TAYVYVNF** - **IV** **VWIVAVGWF** **GGWASVSVF** 438  
 Chlvu1\_72534\_fgeneshCV\_pg.C\_scaffold\_5000157 - **FLR** **KANWLL** **IWALN** **S** - **II** **IWL** **FGQFGF** **GWYFSS** **LKLH** 371  
 Chlvu1\_83476\_estExt\_fgeneshCV\_pg.C\_120108 - **CLR** **VWNWSP** **VFALN** **VG** - **II** **LWTV** **VAQFG** **GTYS** **IRRM** 474  
 Chlvu1\_102119\_igs.C169-scaffold\_4-gm\_106 - **PFN** **KFGWKV** **AFALN** **YF** - **IM** **VVYAA** **FTVGF** **G** **FFS** **IQR** **IV** 396  
 Chlvu1\_33242\_e\_gw1.19.91.1 - **F** **IG** - - **GW** **TAML** **LNTY** - **ML** **LWFT** **IFG** **GTWAA** **IKNLV** 388  
 Chlvu1\_44422\_estExt\_Genewise1Plus.C\_150232 - **WTG** - - **GW** **PLV** **VNS** - **FV** **IYF** **FGFC** **GGWAS** **KT** **LV** 390  
 ChINC64A\_1\_133952\_IGS.gm\_10\_00243 **GMGGPT** **GW** **TG** **WLLPR** **PWV** **II** **VFTAI** **FG** **GGYAS** **IKVRL** 563  
 ChINC64A\_1\_152339|fgenesh3\_pg.C\_scaffold\_10000124 **GMGGPT** **GW** **TG** **WLLPR** **PWV** **II** **VFTAI** **FG** **GGYAS** **IKVRL** 563  
 AAP1\_AT1G58360 - - - - - **W** **IA** **LK** **TM** **CY** **V** **CL** **IS** **L** **AA** - - - **GS** **IAG** **L** 471

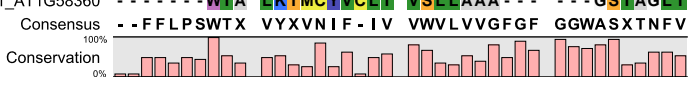

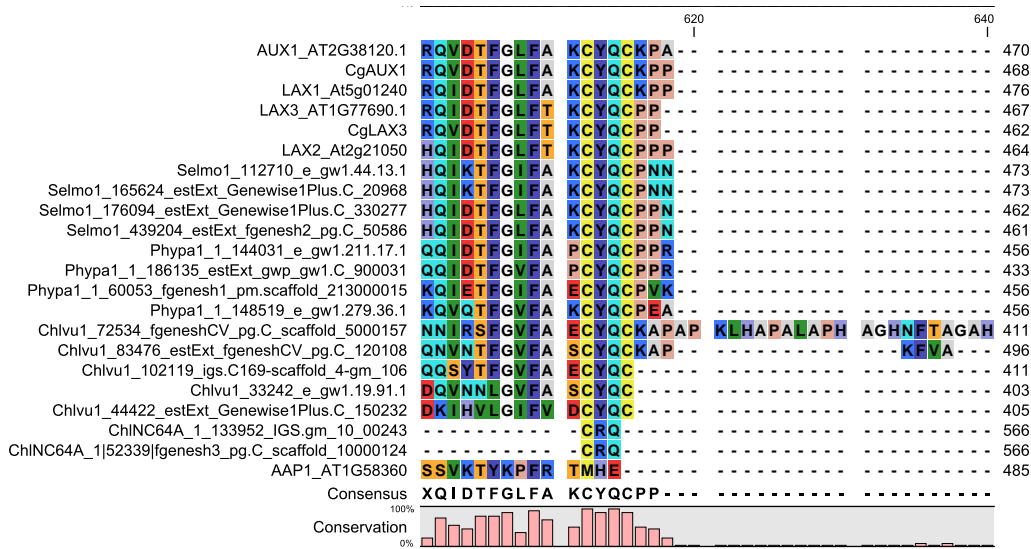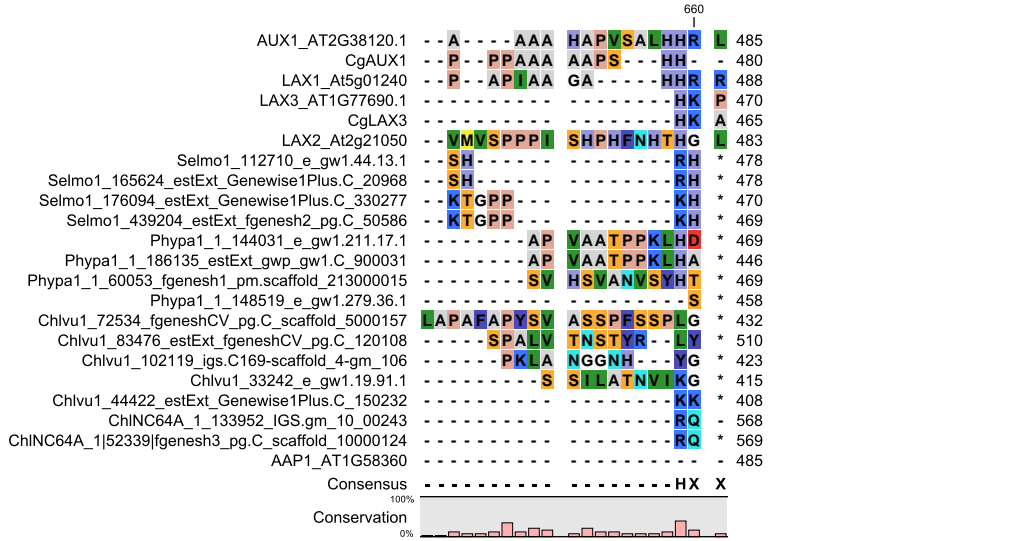

Figure S24 – UPGMA tree for PGP orthologs

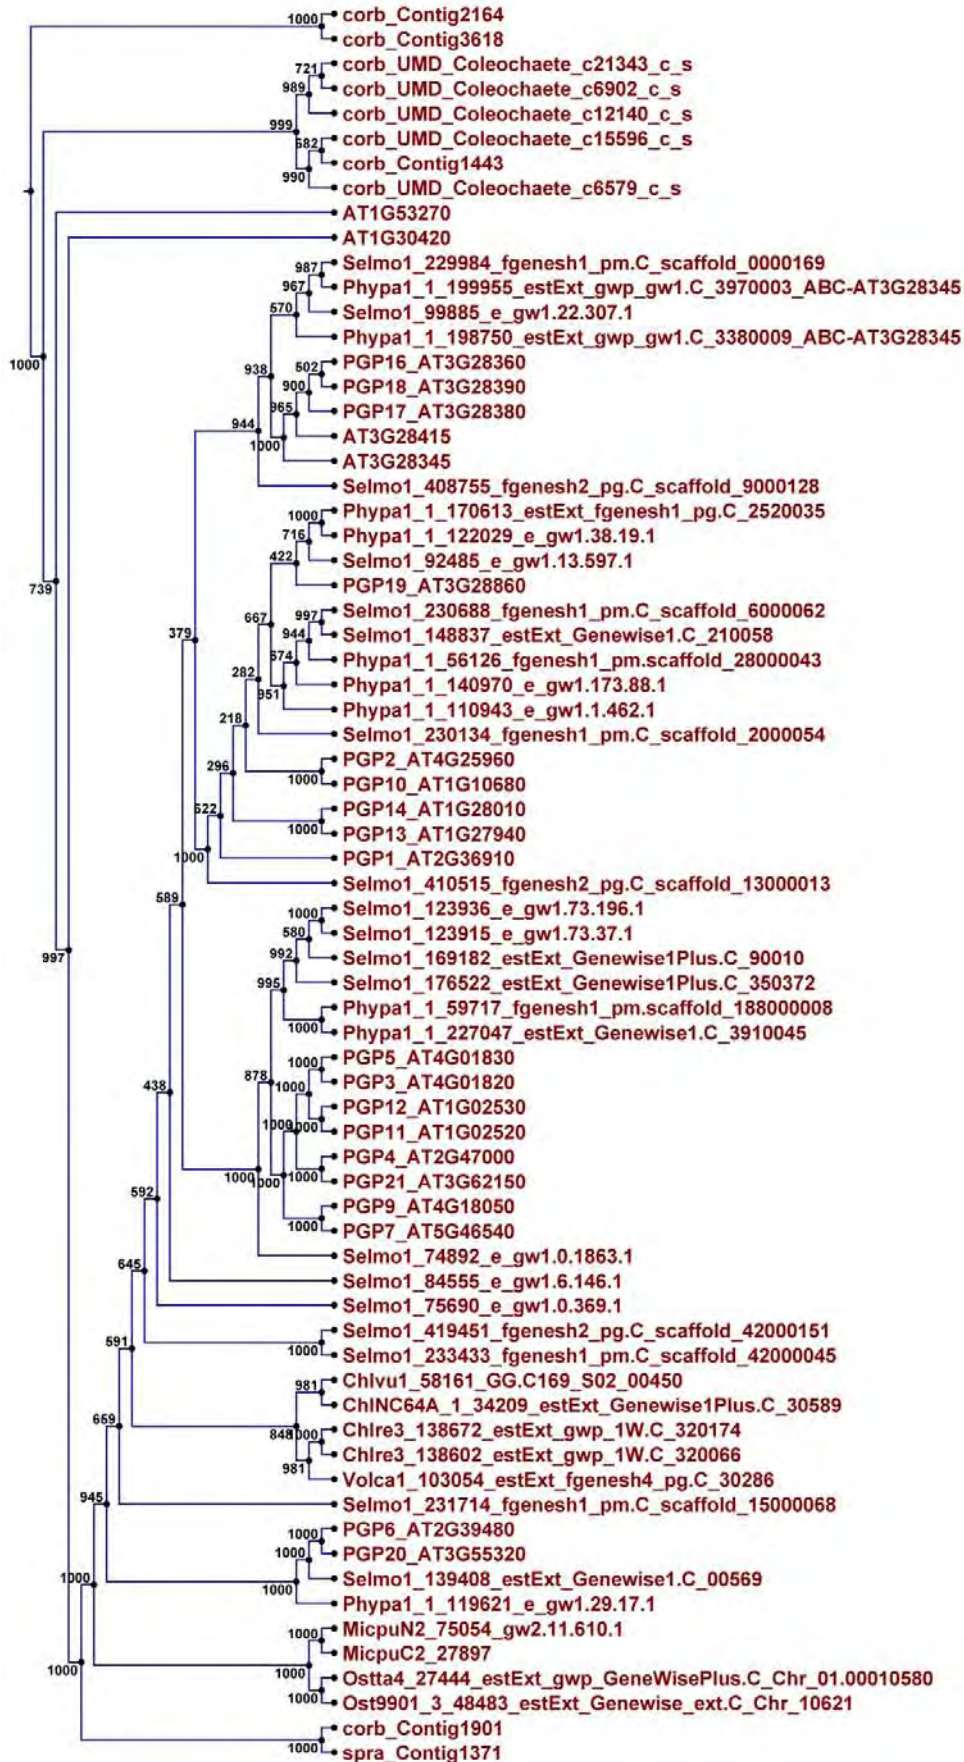

Figure S25 – UPGMA tree for TPL-TPR1,2,3,4 orthologs

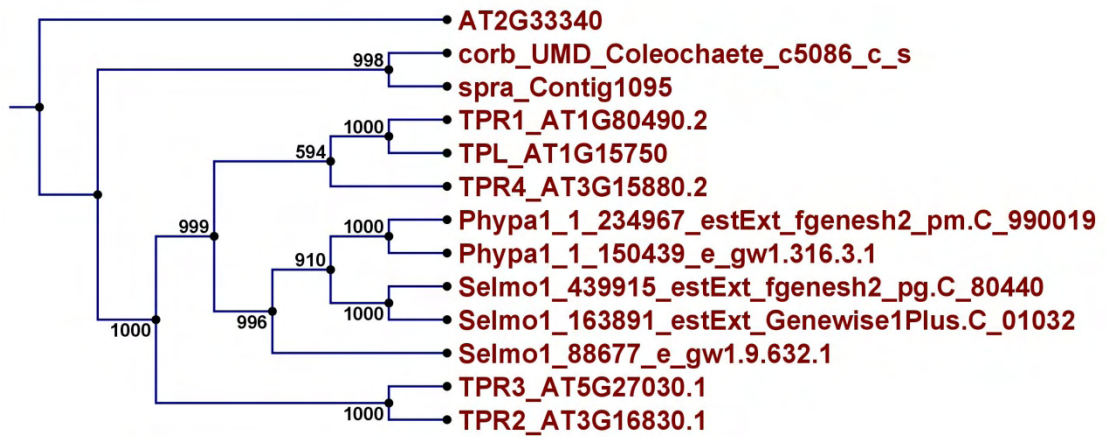

Figure S26 – UPGMA tree for IBR5 orthologs

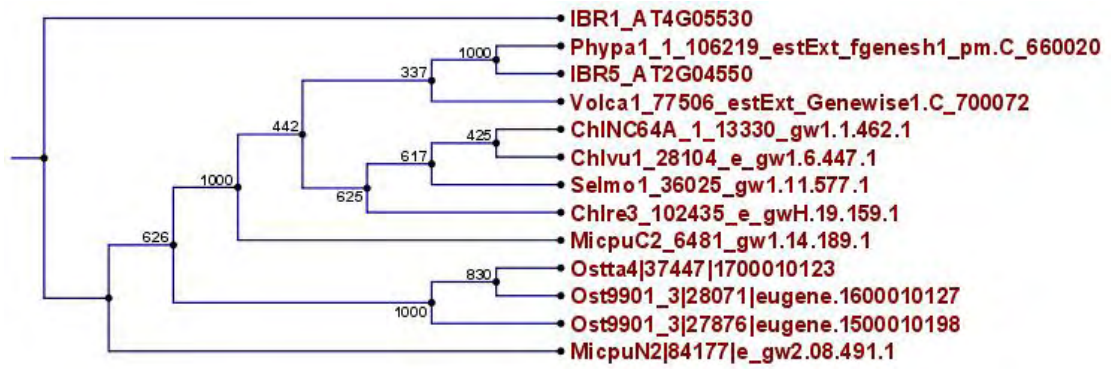

Figure S27 – UPGMA tree for ABP1 orthologs

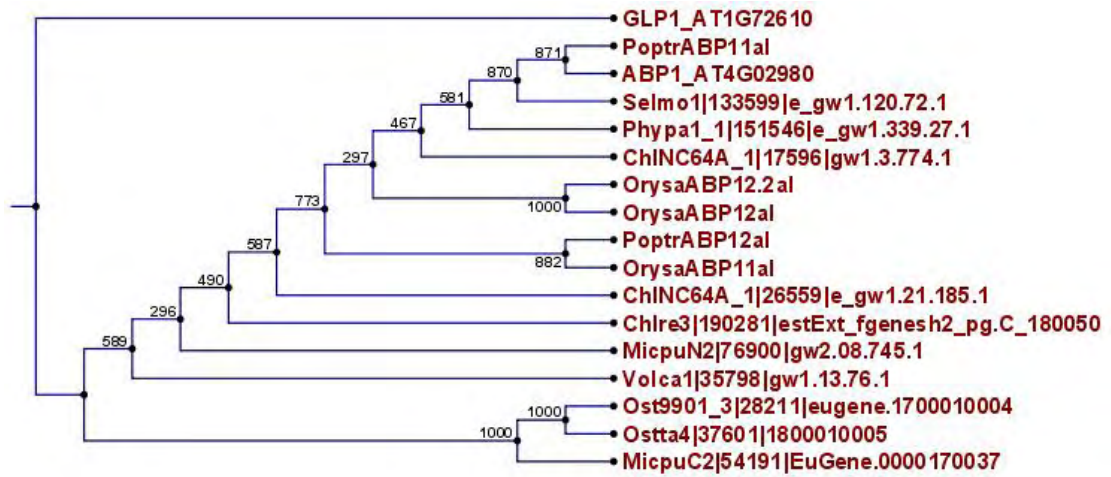

Figure S28 – alignment of AUX/IAAs and putative orthologs





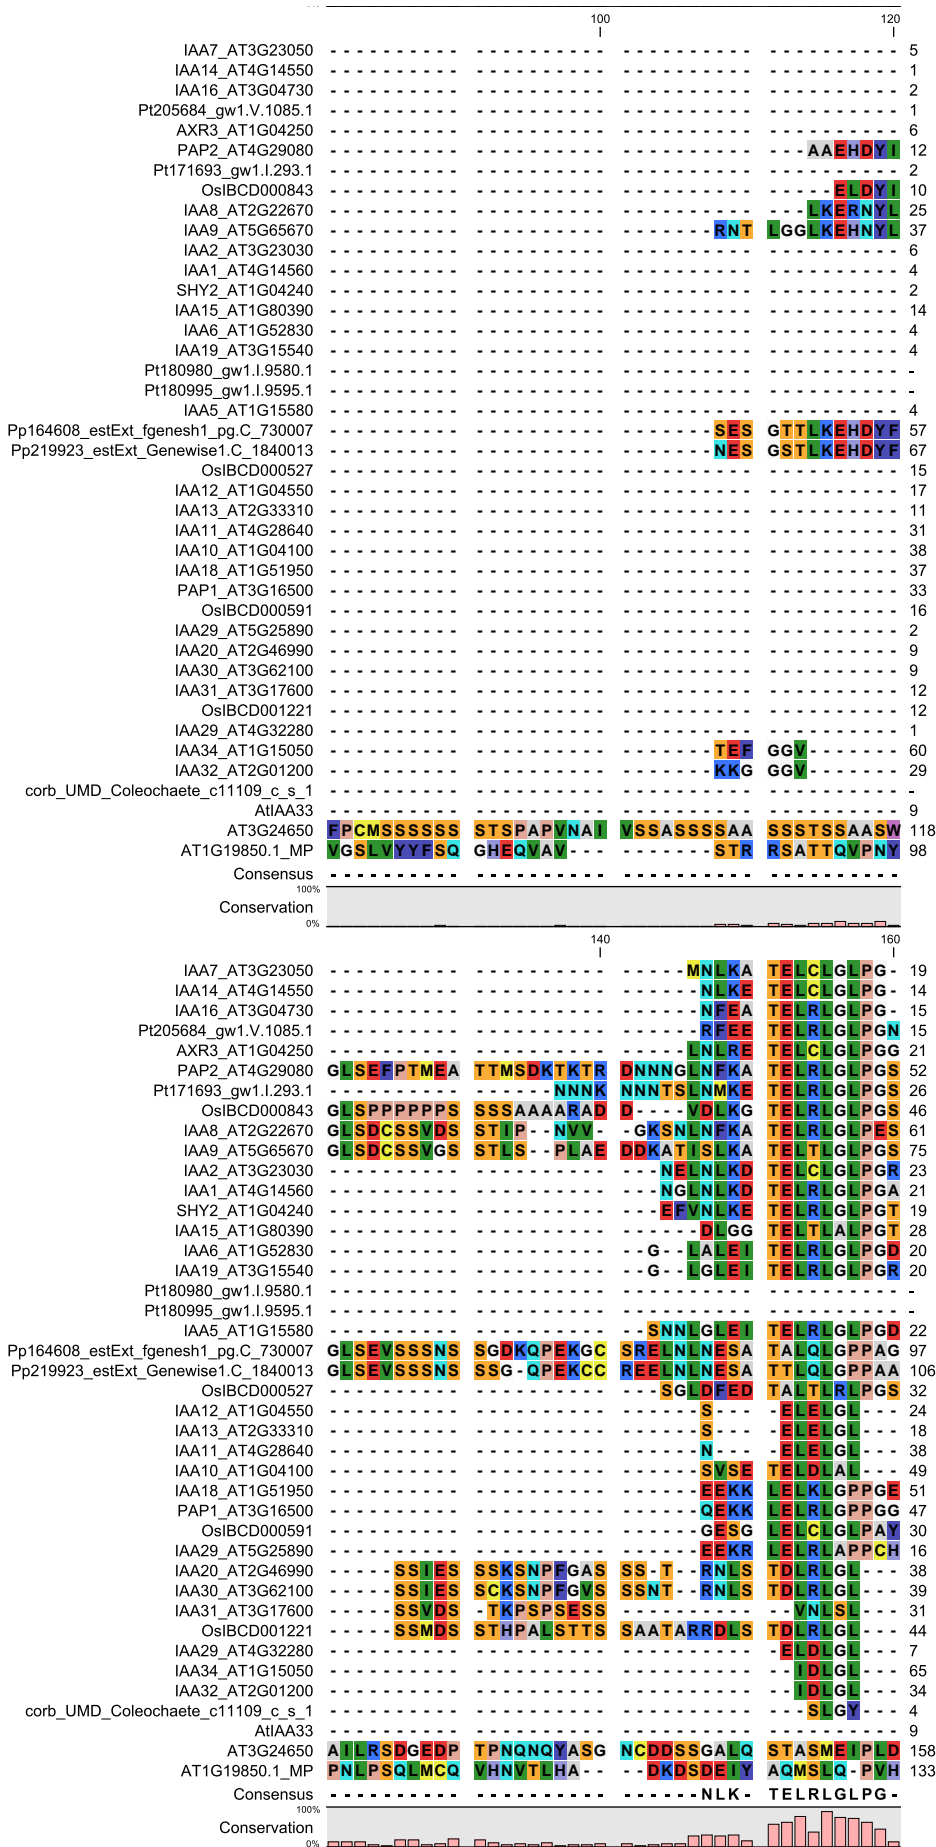

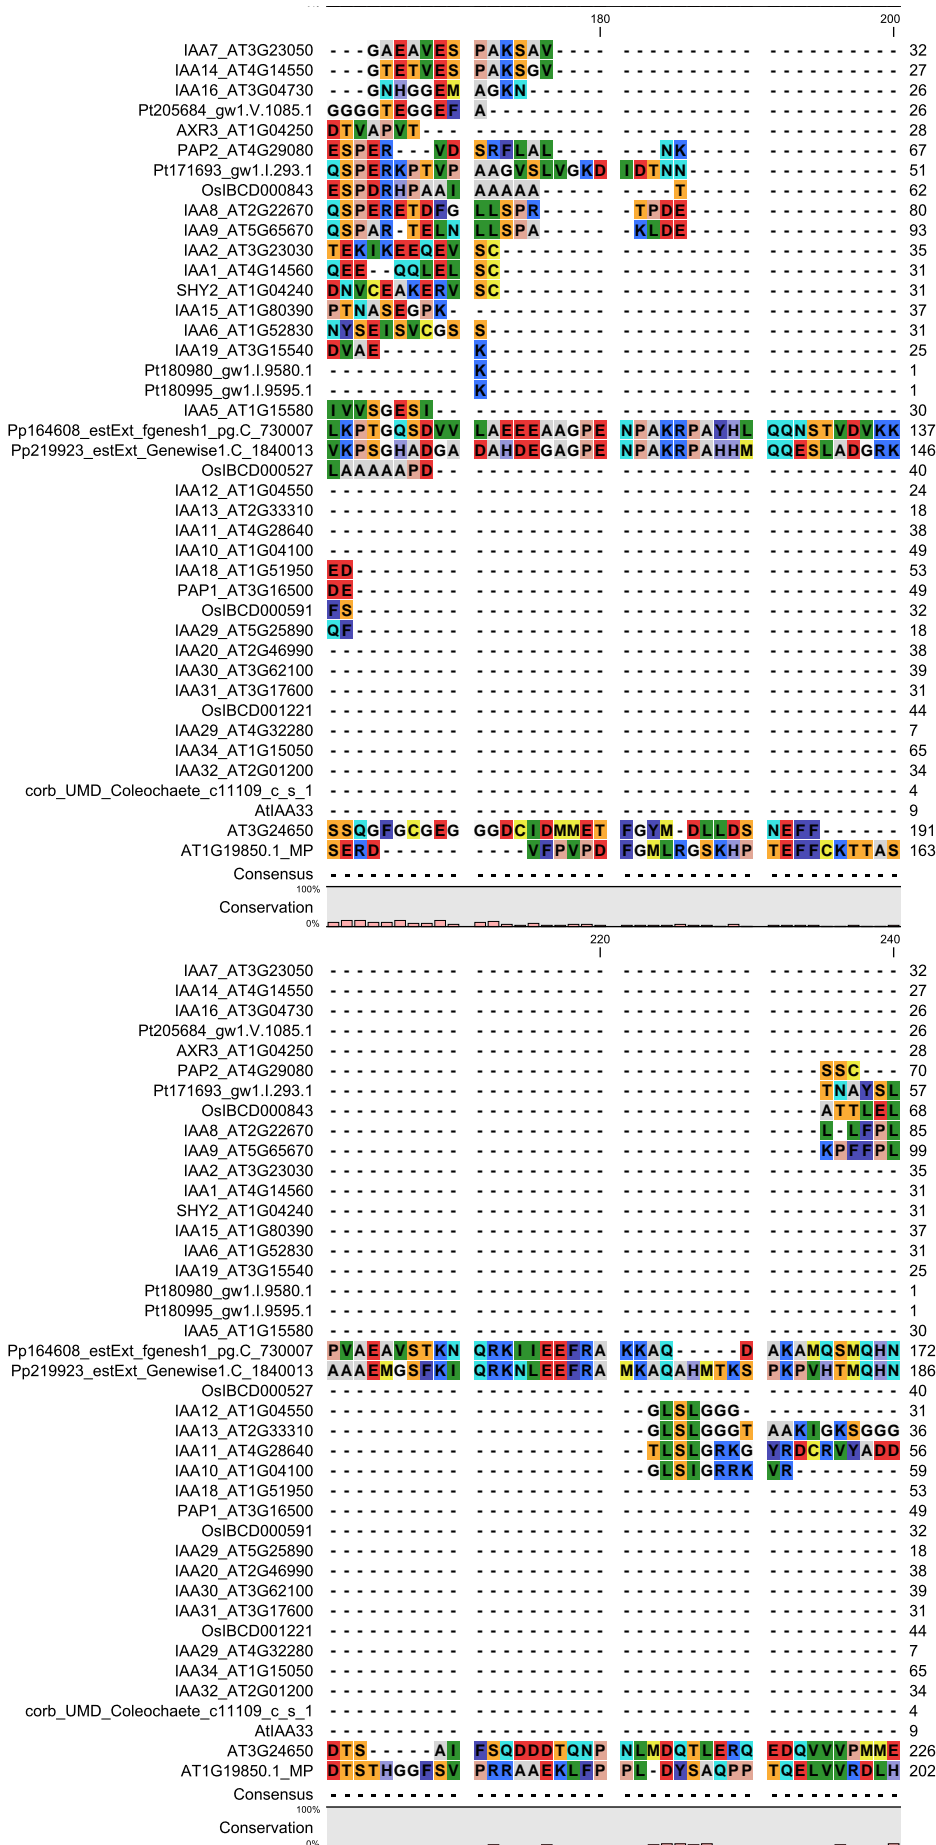

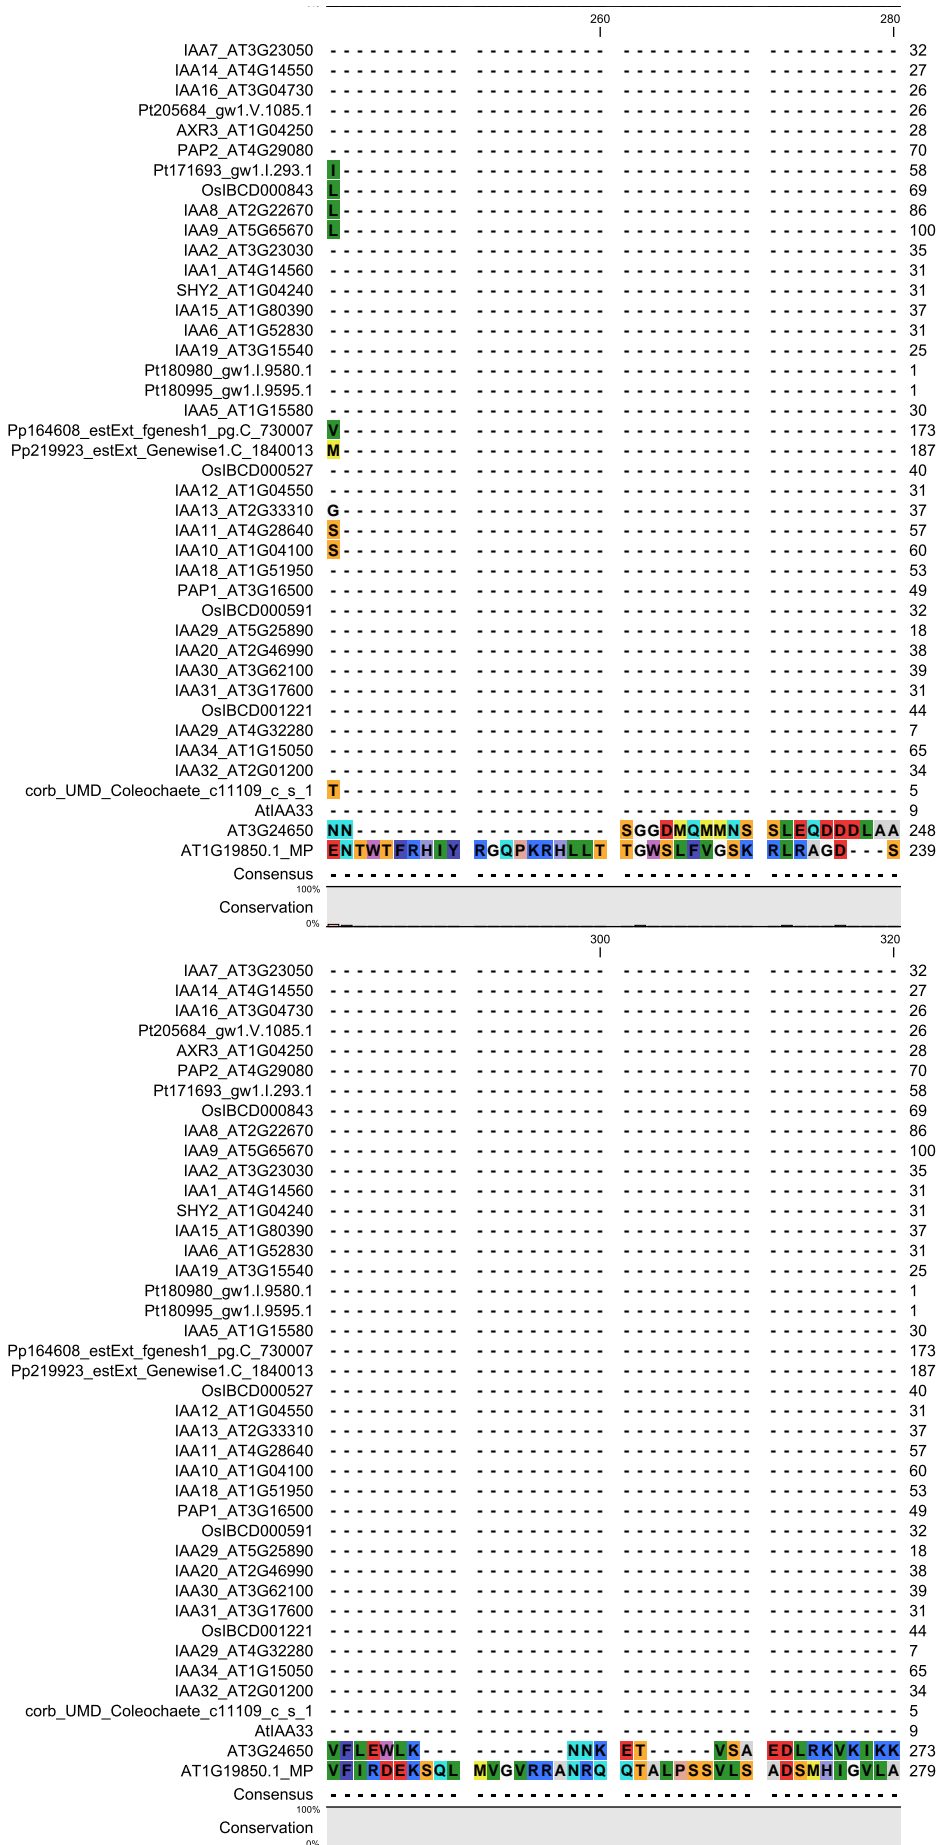

|                                      | 340                        | 360                         |                                  |                                |
|--------------------------------------|----------------------------|-----------------------------|----------------------------------|--------------------------------|
| IAA7_AT3G23050                       | .....                      | .....                       | 32                               |                                |
| IAA14_AT4G14550                      | .....                      | .....                       | 27                               |                                |
| IAA16_AT3G04730                      | .....                      | .....                       | 26                               |                                |
| Pt205684_gw1.V.1085.1                | .....                      | .....                       | 26                               |                                |
| AXR3_AT1G04250                       | .....                      | .....                       | 28                               |                                |
| PAP2_AT4G29080                       | .....                      | .....                       | PV 72                            |                                |
| Pt171693_gw1.I.293.1                 | .....                      | .....                       | PV 60                            |                                |
| OsiBCD000843                         | .....                      | .....                       | PA 71                            |                                |
| IAA8_AT2G22670                       | .....                      | .....                       | PS 88                            |                                |
| IAA9_AT5G65670                       | .....                      | .....                       | PS 102                           |                                |
| IAA2_AT3G23030                       | .....                      | .....                       | 35                               |                                |
| IAA1_AT4G14560                       | .....                      | .....                       | 31                               |                                |
| SHY2_AT1G04240                       | .....                      | .....                       | 31                               |                                |
| IAA15_AT1G80390                      | .....                      | .....                       | 37                               |                                |
| IAA6_AT1G52830                       | .....                      | .....                       | 31                               |                                |
| IAA19_AT3G15540                      | .....                      | .....                       | 25                               |                                |
| Pt180980_gw1.I.9580.1                | .....                      | .....                       | 1                                |                                |
| Pt180995_gw1.I.9595.1                | .....                      | .....                       | 1                                |                                |
| IAA5_AT1G15580                       | .....                      | .....                       | 30                               |                                |
| Pp164608_estExt_fgenesh1_pg.C_730007 | .....                      | .....                       | RA 175                           |                                |
| Pp219923_estExt_Genewise1.C_1840013  | .....                      | .....                       | HA 189                           |                                |
| OsiBCD000527                         | .....                      | .....                       | 40                               |                                |
| IAA12_AT1G04550                      | .....                      | .....                       | AW 33                            |                                |
| IAA13_AT2G33310                      | .....                      | .....                       | AW 39                            |                                |
| IAA11_AT4G28640                      | .....                      | .....                       | SS 59                            |                                |
| IAA10_AT1G04100                      | .....                      | .....                       | SI 62                            |                                |
| IAA18_AT1G51950                      | .....                      | .....                       | 53                               |                                |
| PAP1_AT3G16500                       | .....                      | .....                       | 49                               |                                |
| OsiBCD000591                         | .....                      | .....                       | 32                               |                                |
| IAA29_AT5G25890                      | .....                      | .....                       | 18                               |                                |
| IAA20_AT2G46990                      | .....                      | .....                       | 38                               |                                |
| IAA30_AT3G62100                      | .....                      | .....                       | 39                               |                                |
| IAA31_AT3G17600                      | .....                      | .....                       | 31                               |                                |
| OsiBCD001221                         | .....                      | .....                       | 44                               |                                |
| IAA29_AT4G32280                      | .....                      | .....                       | 7                                |                                |
| IAA34_AT1G15050                      | .....                      | .....                       | 65                               |                                |
| IAA32_AT2G01200                      | .....                      | .....                       | 34                               |                                |
| corb_UMD_Coleochaete_c11109_c_s_1    | .....                      | .....                       | TX 7                             |                                |
| AtIAA33                              | .....                      | .....                       | 9                                |                                |
| AT3G24650                            | <b>AT</b> IESAARR <b>-</b> | .....                       | IG GGKEAM <b>-</b> <b>KQ</b> 292 |                                |
| AT1G19850.1_MP                       | <b>AAAHA</b> T <b>ANRT</b> | <b>PFLIF</b> YN <b>PR</b> A | <b>CPAEF</b> VP <b>LA</b>        | <b>KYRKA</b> IC <b>GSQ</b> 319 |
| Consensus                            | .....                      | .....                       | .....                            |                                |

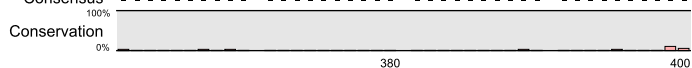

|                                      | 380                                                    | 400                                                    |                                                         |                                                             |                                               |    |
|--------------------------------------|--------------------------------------------------------|--------------------------------------------------------|---------------------------------------------------------|-------------------------------------------------------------|-----------------------------------------------|----|
| IAA7_AT3G23050                       | .....                                                  | .....                                                  | 43                                                      |                                                             |                                               |    |
| IAA14_AT4G14550                      | .....                                                  | .....                                                  | 38                                                      |                                                             |                                               |    |
| IAA16_AT3G04730                      | .....                                                  | .....                                                  | 37                                                      |                                                             |                                               |    |
| Pt205684_gw1.V.1085.1                | .....                                                  | .....                                                  | 36                                                      |                                                             |                                               |    |
| AXR3_AT1G04250                       | .....                                                  | .....                                                  | 39                                                      |                                                             |                                               |    |
| PAP2_AT4G29080                       | .....                                                  | .....                                                  | 97                                                      |                                                             |                                               |    |
| Pt171693_gw1.I.293.1                 | <b>K</b> .....                                         | .....                                                  | 87                                                      |                                                             |                                               |    |
| OsiBCD000843                         | <b>K</b> .....                                         | .....                                                  | 81                                                      |                                                             |                                               |    |
| IAA8_AT2G22670                       | <b>KDNGS</b> ATT <b>GH</b>                             | <b>KNVVS</b> GN <b>KRG</b>                             | <b>FADT</b> W <b>DF</b> FS <b>G</b> .....               | <b>VKGS</b> VR <b>P</b> 125                                 |                                               |    |
| IAA9_AT5G65670                       | <b>KDE</b> - <b>ICSSSQ</b>                             | <b>KNNAS</b> GN <b>KRG</b>                             | <b>FSDT</b> MD <b>Q</b> FA <b>E</b> .....               | <b>AKSS</b> V <b>Y</b> T 138                                |                                               |    |
| IAA2_AT3G23030                       | .....                                                  | .....                                                  | 50                                                      |                                                             |                                               |    |
| IAA1_AT4G14560                       | .....                                                  | .....                                                  | 45                                                      |                                                             |                                               |    |
| SHY2_AT1G04240                       | .....                                                  | .....                                                  | 46                                                      |                                                             |                                               |    |
| IAA15_AT1G80390                      | .....                                                  | .....                                                  | 62                                                      |                                                             |                                               |    |
| IAA6_AT1G52830                       | .....                                                  | .....                                                  | 52                                                      |                                                             |                                               |    |
| IAA19_AT3G15540                      | .....                                                  | .....                                                  | 48                                                      |                                                             |                                               |    |
| Pt180980_gw1.I.9580.1                | .....                                                  | .....                                                  | 11                                                      |                                                             |                                               |    |
| Pt180995_gw1.I.9595.1                | .....                                                  | .....                                                  | 11                                                      |                                                             |                                               |    |
| IAA5_AT1G15580                       | .....                                                  | .....                                                  | 43                                                      |                                                             |                                               |    |
| Pp164608_estExt_fgenesh1_pg.C_730007 | <b>SYPGA</b> Q <b>S</b> V <b>F</b> P                   | <b>GAKNN</b> GV <b>KRG</b>                             | <b>FSEAV</b> GT <b>N</b> F <b>N</b>                     | <b>ASSG</b> AG <b>G</b> AV <b>R</b> 215                     |                                               |    |
| Pp219923_estExt_Genewise1.C_1840013  | <b>SFSGA</b> Q <b>M</b> A <b>F</b> G                   | <b>GAKNN</b> GV <b>KRV</b>                             | <b>FSEAV</b> GG <b>N</b> H <b>I</b>                     | <b>AASG</b> V <b>G</b> V <b>G</b> VR 229                    |                                               |    |
| OsiBCD000527                         | .....                                                  | .....                                                  | 52                                                      |                                                             |                                               |    |
| IAA12_AT1G04550                      | <b>KERGR</b> LL <b>TAK</b>                             | <b>DFPSV</b> GS <b>KRS</b>                             | <b>A</b> ESS <b>SH</b> .....                            | 59                                                          |                                               |    |
| IAA13_AT2G33310                      | <b>GERGR</b> LL <b>TAK</b>                             | <b>DFPSV</b> GS <b>KRA</b>                             | <b>A</b> D <b>S</b> ASH.....                            | 65                                                          |                                               |    |
| IAA11_AT4G28640                      | <b>SSSSS</b> LS <b>R</b> A                             | <b>SVIA</b> -G <b>I</b> K <b>R</b> T                   | <b>A</b> D <b>M</b> A <b>A</b> T.....                   | 84                                                          |                                               |    |
| IAA10_AT1G04100                      | <b>SSSSS</b> SL <b>TRE</b>                             | <b>S</b> .....                                         | <b>G</b> T <b>KRS</b>                                   | <b>A</b> D <b>S</b> P <b>A</b> A.....                       | 84                                            |    |
| IAA18_AT1G51950                      | <b>DDESM</b> .....                                     | .....                                                  | <b>RHM</b> K <b>KEP</b>                                 | <b>KDKS</b> IL <b>S</b> AG                                  | <b>KYFS</b> .....                             | 80 |
| PAP1_AT3G16500                       | <b>EDHSA</b> IK <b>KKN</b>                             | <b>TEIRN</b> IK <b>KET</b>                             | <b>EDKS</b> F <b>H</b> C <b>ENG</b>                     | <b>N</b> - <b>FS</b> .....                                  | 82                                            |    |
| OsiBCD000591                         | <b>SSSSS</b> .....                                     | .....                                                  | <b>KP</b>                                               | <b>SE</b> G <b>S</b> T <b>A</b> P <b>A</b> F                | <b>ALRS</b> .....                             | 53 |
| IAA29_AT5G25890                      | <b>TSNNN</b> .....                                     | .....                                                  | .....                                                   | <b>NG</b>                                                   | <b>SKQK</b> .....                             | 30 |
| IAA20_AT2G46990                      | .....                                                  | .....                                                  | <b>SFG</b> T <b>S</b> S <b>G</b> T <b>Y</b>             | <b>F</b> NG <b>G</b> Y <b>G</b> Y                           | 55                                            |    |
| IAA30_AT3G62100                      | .....                                                  | .....                                                  | <b>SFG</b> SS <b>S</b> G <b>-</b> Q <b>Y</b>            | <b>Y</b> NG <b>G</b> D <b>NH</b> .....                      | 55                                            |    |
| IAA31_AT3G17600                      | .....                                                  | .....                                                  | <b>SLT</b> .....                                        | .....                                                       | 34                                            |    |
| OsiBCD001221                         | .....                                                  | .....                                                  | <b>SL</b> ST <b>S</b> SS <b>S</b> SL                    | <b>L</b> Q <b>A</b> A <b>A</b> A.....                       | 61                                            |    |
| IAA29_AT4G32280                      | .....                                                  | .....                                                  | <b>S</b>                                                | <b>L</b> SP <b>H</b> K <b>S</b> KL <b>G</b>                 | <b>F</b> N <b>F</b> DL <b>N</b> .....         | 24 |
| IAA34_AT1G15050                      | .....                                                  | .....                                                  | .....                                                   | <b>SLRT</b>                                                 | <b>I</b> Q <b>H</b> E <b>I</b> Y.....         | 75 |
| IAA32_AT2G01200                      | .....                                                  | .....                                                  | .....                                                   | <b>SLRT</b>                                                 | <b>I</b> Q <b>H</b> E <b>T</b> Y.....         | 44 |
| corb_UMD_Coleochaete_c11109_c_s_1    | <b>S</b> R <b>X</b> N <b>H</b> QL <b>F</b> GD          | <b>V</b> H <b>G</b> SS <b>S</b> PK <b>P</b> G          | <b>N</b> S <b>S</b> T <b>S</b> SS <b>S</b> V <b>S</b> G | .....                                                       | 37                                            |    |
| AtIAA33                              | .....                                                  | .....                                                  | <b>DS</b> Q <b>RR</b>                                   | <b>F</b> H <b>Q</b> .....                                   | 18                                            |    |
| AT3G24650                            | <b>L</b> L <b>K</b> L <b>I</b> EW <b>V</b>             | <b>Q</b> T <b>N</b> HL <b>Q</b> RR <b>T</b>            | <b>T</b> T <b>T</b> T <b>T</b> N <b>L</b> S <b>Y</b> Q  | <b>Q</b> S <b>F</b> Q <b>D</b> DP <b>F</b> Q <b>N</b> ..... | 331                                           |    |
| AT1G19850.1_MP                       | <b>L</b> V <b>G</b> M <b>R</b> F <b>G</b> M <b>M</b> F | <b>E</b> T <b>E</b> D <b>S</b> G <b>K</b> R <b>R</b> Y | <b>M</b> G <b>T</b> I <b>V</b> G <b>I</b> S <b>-</b>    | .....                                                       | <b>D</b> L <b>D</b> P <b>L</b> R <b>W</b> 354 |    |
| Consensus                            | .....                                                  | .....                                                  | .....                                                   | .....                                                       | .....                                         |    |

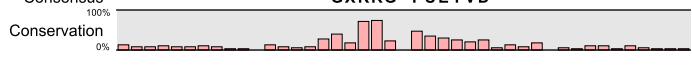

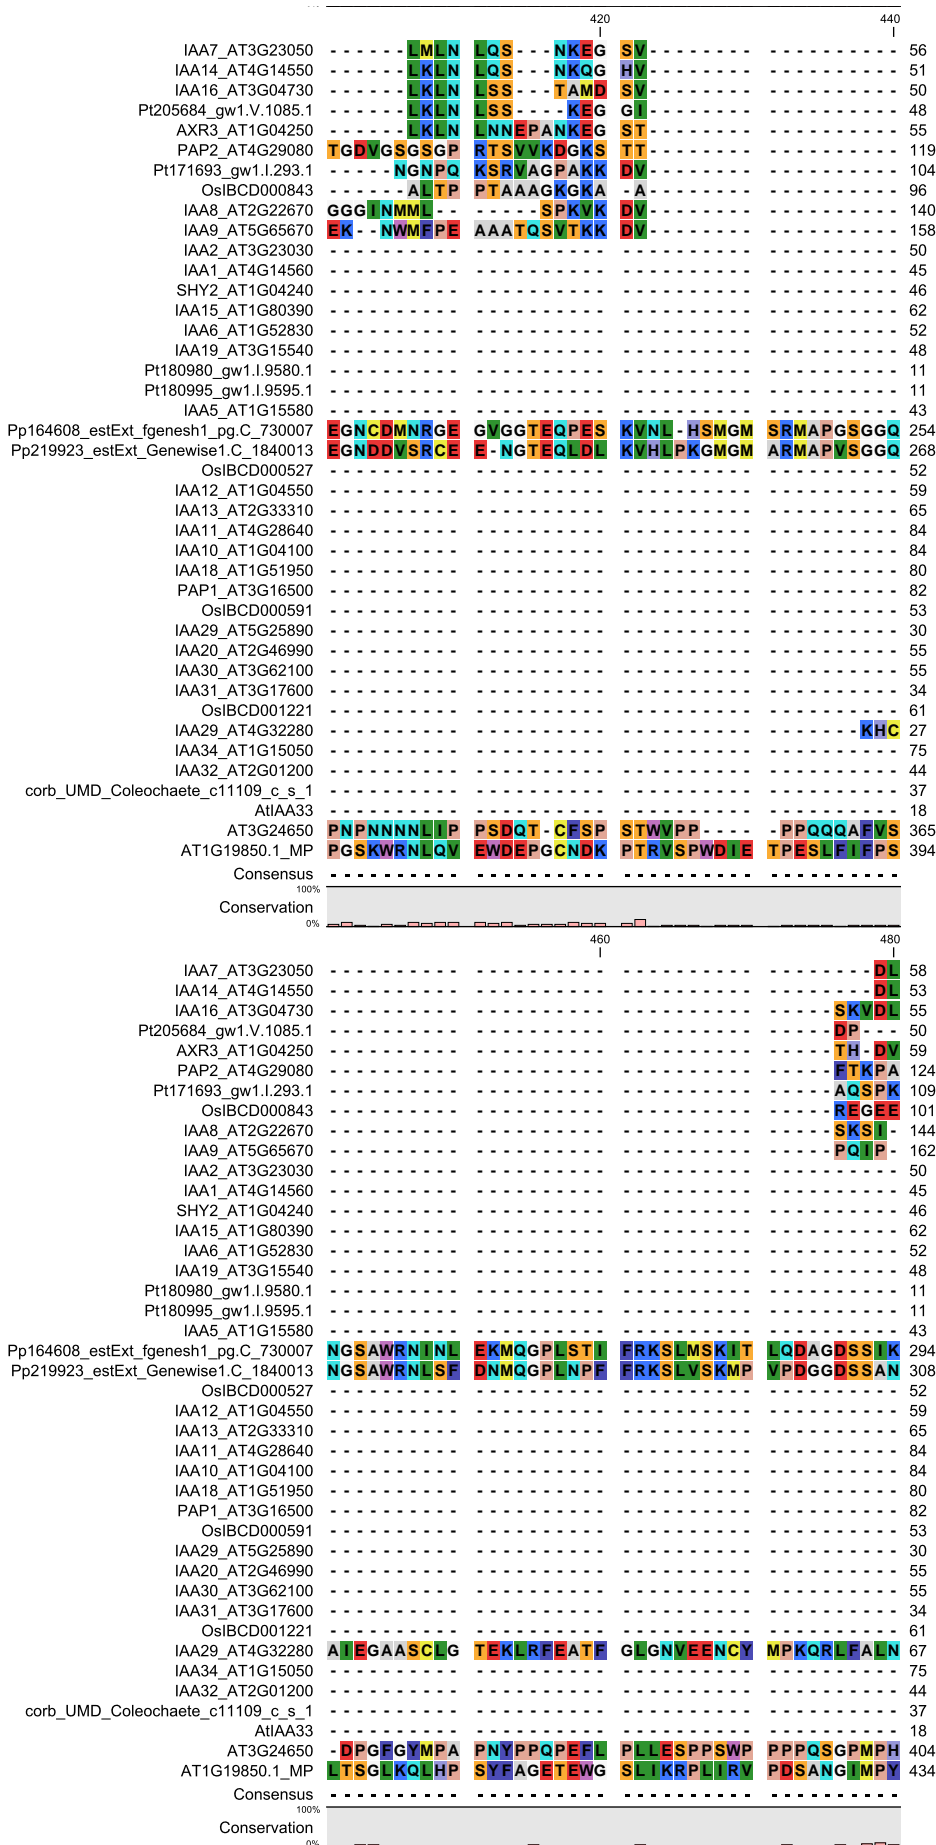

|                                      | 500           | 520                              |         |
|--------------------------------------|---------------|----------------------------------|---------|
| IAA7_AT3G23050                       | KNVSAVPEK     |                                  | 68      |
| IAA14_AT4G14550                      | NTNGAPKEK     |                                  | 62      |
| IAA16_AT3G04730                      | ENM - - - KEK |                                  | 61      |
| Pt205684_gw1.V.1085.1                | NHEKTQREK     |                                  | 59      |
| AXR3_AT1G04250                       | VTFDS - KEK   |                                  | 67      |
| PAP2_AT4G29080                       | VPVKEKKS -    |                                  | 132     |
| Pt171693_gw1.I.293.1                 | PVQEKNSQV     |                                  | 118     |
| OsiBCD000843                         | VGAEEDKKV     |                                  | 111     |
| IAA8_AT2G22670                       | QERSH -       |                                  | 150     |
| IAA9_AT5G65670                       | KQSST -       |                                  | 168     |
| IAA2_AT3G23030                       | E -           |                                  | 51      |
| IAA1_AT4G14560                       | E -           |                                  | 46      |
| SHY2_AT1G04240                       | EIE           |                                  | 49      |
| IAA15_AT1G80390                      |               |                                  | 62      |
| IAA6_AT1G52830                       | NSVSSV        |                                  | 59      |
| IAA19_AT3G15540                      | SGVSSG        |                                  | 55      |
| Pt180980_gw1.I.9580.1                | SGEANST       |                                  | 18      |
| Pt180995_gw1.I.9595.1                | SGEANST       |                                  | 18      |
| IAA5_AT1G15580                       |               |                                  | 43      |
| Pp164608_estExt_fgenesh1_pg.C_730007 | CSSDVIINRNK   |                                  | 304     |
| Pp219923_estExt_Genewise1.C_1840013  | ASNDGANRKG    |                                  | 318     |
| OsiBCD000527                         | AAADADNSS     |                                  | 61      |
| IAA12_AT1G04550                      |               |                                  | 59      |
| IAA13_AT2G33310                      |               |                                  | 65      |
| IAA11_AT4G28640                      |               |                                  | 84      |
| IAA10_AT1G04100                      |               |                                  | 84      |
| IAA18_AT1G51950                      | SSTK          |                                  | 84      |
| PAP1_AT3G16500                       | PSNK          |                                  | 86      |
| OsiBCD000591                         | NGTN          |                                  | 57      |
| IAA29_AT5G25890                      | SSTK          |                                  | 34      |
| IAA20_AT2G46990                      |               |                                  | 55      |
| IAA30_AT3G62100                      |               |                                  | 55      |
| IAA31_AT3G17600                      |               |                                  | 34      |
| OsiBCD001221                         |               |                                  | 61      |
| IAA29_AT4G32280                      | GQPNEEDEDP    |                                  | 77      |
| IAA34_AT1G15050                      |               |                                  | 75      |
| IAA32_AT2G01200                      |               |                                  | 44      |
| corb_UMD_Coleochaete_c11109_c_s_1    | SAS           |                                  | 40      |
| AtIAA33                              |               |                                  | 18      |
| AT3G24650                            | QQFPMPTTSQ    | YN QEGDPT                        | GEN 425 |
| AT1G19850.1_MP                       | ASFPMSASEQ    | LMKMMMRPHN NQNVPSFMSE MQQNIIVMNG | 474     |
| Consensus                            |               |                                  |         |

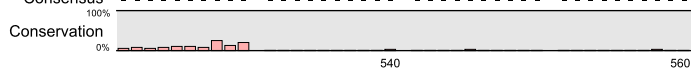

|                                      | 540        | 560                       |                |    |
|--------------------------------------|------------|---------------------------|----------------|----|
| IAA7_AT3G23050                       | TTLK -     | DPSKPPAK - Q              | 81             |    |
| IAA14_AT4G14550                      | TELK -     | DPSKPPAKAQ                | 76             |    |
| IAA16_AT3G04730                      | VV - -     | - - - KPPAKAQ             | 70             |    |
| Pt205684_gw1.V.1085.1                | NLLAT      | DPAKPPAKAQ                | 74             |    |
| AXR3_AT1G04250                       | SACPK      | DPAKPPAK - Q              | 81             |    |
| PAP2_AT4G29080                       |            | SATAPASKAQ                | 142            |    |
| Pt171693_gw1.I.293.1                 | AAANE      | NSSAPAAKTQ                | 133            |    |
| OsiBCD000843                         | AA -       | - PPQPAAKAQ               | 122            |    |
| IAA8_AT2G22670                       | - AKG      | GNNAPAKAQ                 | 163            |    |
| IAA9_AT5G65670                       | - TNN      | SSSPPAAKAQ                | 181            |    |
| IAA2_AT3G23030                       |            | - ESTPPTKTQ               | 60             |    |
| IAA1_AT4G14560                       |            | - SAPPAAKTQ               | 55             |    |
| SHY2_AT1G04240                       |            | SSSRK                     | TETSPPRKQ      | 64 |
| IAA15_AT1G80390                      |            | - SSMVTNDQ                | 70             |    |
| IAA6_AT1G52830                       | ED - -     | - ESIPVVKSQ               | 70             |    |
| IAA19_AT3G15540                      | GDAEK      | VNDSPPAAKSQ               | 70             |    |
| Pt180980_gw1.I.9580.1                | TDGRK      | TQTT - - - SQ             | 29             |    |
| Pt180995_gw1.I.9595.1                | TDGRK      | TQTT - - - SQ             | 29             |    |
| IAA5_AT1G15580                       |            | LKCEPAKKSQ                | 53             |    |
| Pp164608_estExt_fgenesh1_pg.C_730007 | AIAPA      | SNEQPLAQNQ                | 319            |    |
| Pp219923_estExt_Genewise1.C_1840013  | MVSP -     | SVQPPPAQNG                | 332            |    |
| OsiBCD000527                         | PLAAA      | ADAPPAPKAR                | 76             |    |
| IAA12_AT1G04550                      |            | QGASPPRSSQ                | 69             |    |
| IAA13_AT2G33310                      |            | AGSSPPRSSQ                | 75             |    |
| IAA11_AT4G28640                      |            | SG - - - - - Q            | 87             |    |
| IAA10_AT1G04100                      |            | ASNA - - - TRQ            | 91             |    |
| IAA18_AT1G51950                      | TTS -      | - - - HKRTAPG             | 94             |    |
| PAP1_AT3G16500                       | TTSVP      | HISQKRTAPG                | 101            |    |
| OsiBCD000591                         | ASK -      | - - - PRAAAAA             | 67             |    |
| IAA29_AT5G25890                      | ETSF -     | - LSNRVEVA                | 47             |    |
| IAA20_AT2G46990                      | SVAAF      | AVEDA EYVAA               | 70             |    |
| IAA30_AT3G62100                      | EY - D     | GVGAAEEMM                 | 68             |    |
| IAA31_AT3G17600                      |            | - FPSTSPQRE               | 43             |    |
| OsiBCD001221                         | AAADD      | SIPSTPRNSQ                | 76             |    |
| IAA29_AT4G32280                      | LESSS      | LVYDDEEENS                | 92             |    |
| IAA34_AT1G15050                      |            |                           | 75             |    |
| IAA32_AT2G01200                      |            | - LPPARM                  | 51             |    |
| corb_UMD_Coleochaete_c11109_c_s_1    | MSATP      | SMSATPRRS                 | 55             |    |
| AtIAA33                              |            | - DNSTIQQP                | 26             |    |
| AT3G24650                            | GYNMNPYQYP | YV - - - PAGQM RDQRLRLRCS | SATKEARKKR 462 |    |
| AT1G19850.1_MP                       | GLLGDMMQQP | LMMNQKSEMV QPQNKLTVNP     | SASNTSGEQE 514 |    |
| Consensus                            |            | - - - SPPAKAQ             |                |    |

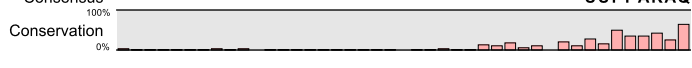

580 600

|                                      |                |              |               |           |                |           |
|--------------------------------------|----------------|--------------|---------------|-----------|----------------|-----------|
| IAA7_AT3G23050                       | V - VGWPPV - - | RNYRKNMMT    | QQK           | - - - - - | - TSSGAE -     | 107       |
| IAA14_AT4G14550                      | V - VGWP - - - | RNYRKNVMA    | NQK           | - - - - - | - SGAE -       | 100       |
| IAA16_AT3G04730                      | V - VGWPPV - - | RSF - KNVMS  | GQKP          | - - - - - | - TGDAT -      | 96        |
| Pt205684_gw1.V.1085.1                | V - VGWPP - -  | RSFRKNMLA    | VQK           | - - - - - | - SSTDQ -      | 98        |
| AXR3_AT1G04250                       | V - VGWPPV - - | RSYRKNMV     | SCQK          | - - - - - | - SSGGPE -     | 108       |
| PAP2_AT4G29080                       | V - VGWPPV - - | RSFRKNSMA    | SSSQ          | - - - - - | - KPGNNS -     | 169       |
| Pt171693_gw1.I.293.1                 | V - VGWPPV - - | RSFRKNTMA    | SSLA          | - - - - - | - K - NND -    | 158       |
| OsiBCD000843                         | V - VGWPPV - - | RSYRKNNTMA   | TNQI          | - - - - - | - K - SNKED -  | 148       |
| IAA8_AT2G22670                       | V - VGWPPV - - | RSYRKNNTMA   | SSTS          | - - - - - | - K - NTDE -   | 188       |
| IAA9_AT5G65670                       | V - VGWPPV - - | RSYRKNNTLA   | T - TC        | - - - - - | - K - NSDE -   | 205       |
| IAA2_AT3G23030                       | V - VGWPPV - - | RSSRKNN - N  | S - V         | - - - - - | - S - - - -    | 78        |
| IAA1_AT4G14560                       | V - VGWPPV - - | RSNRKNN - N  | NKNV          | - - - - - | - S - - - -    | 75        |
| SHY2_AT1G04240                       | V - VGWPPV - - | RSYRKNNIQ    | KKNE          | - - - - - | - SEHEGQG -    | 91        |
| IAA15_AT1G80390                      | L - VGWPPVAT   | AKTVRRK - -  | - - - - -     | - - - - - | - - - - -      | 86        |
| IAA6_AT1G52830                       | A - VGWPPVC -  | SYRKKNN -    | EEAS          | - - - - - | - KA - - - -   | 91        |
| IAA19_AT3G15540                      | V - VGWPPVC -  | SYKKNSC -    | KEAS          | - - - - - | - TT - - - -   | 91        |
| Pt180980_gw1.I.9580.1                | V - VGWPPVC -  | SYRKKNSF     | NEKD          | - - - - - | - SH - - - -   | 51        |
| Pt180995_gw1.I.9595.1                | V - VGWPPVC -  | SYRKKNSF     | NEKD          | - - - - - | - SH - - - -   | 51        |
| IAA5_AT1G15580                       | V - VGWPPVC -  | SYRKNLS      | ERTK          | - - - - - | - SS - - - -   | 75        |
| Pp164608_estExt_fgenesh1_pg.C_730007 | T - GWPPV - -  | KNFNKNMTP    | APPP          | - - - - - | - SAPATAC -    | 345       |
| Pp219923_estExt_Genewise1.C_1840013  | T - GWPPV - -  | KNFNKNMTP    | APPA          | - - - - - | - STPARAC -    | 359       |
| OsiBCD000527                         | V - VGWP - - - | VSFRKNALA    | AK -          | - - - - - | - - - - -      | 93        |
| IAA12_AT1G04550                      | V - VGWPPV - - | GLHR - NSLV  | NNQA          | - - - - - | - MKAARAE -    | 95        |
| IAA13_AT2G33310                      | V - VGWP - - - | GSHRMNSLV    | NNQA          | - - - - - | - TKSAREE -    | 101       |
| IAA11_AT4G28640                      | V - VGWPPV - - | RTYRMSMV     | N - QA        | - - - - - | - KASATE -     | 112       |
| IAA10_AT1G04100                      | VAVGWPPV - -   | RTYRNSLV     | N - QA        | - - - - - | - KSLATEG -    | 118       |
| IAA18_AT1G51950                      | PVVGWPPV - -   | RSFRKNLAS    | GSSS          | - - - - - | - KLGNDSTT -   | 123       |
| PAP1_AT3G16500                       | PVVGWPPV - -   | RSFRKNLAS    | TSSS          | - - - - - | - KLGNESSH -   | 130       |
| OsiBCD000591                         | PVVGWPPV - -   | RSFRRASS     | SSSS          | - - - - - | - SKQAPPPP -   | 96        |
| IAA29_AT5G25890                      | PVVGWPPV - -   | RSSRRNLTA    | QLKE          | - - - - - | - EMK - - - -  | 71        |
| IAA20_AT2G46990                      | VEEE - - - - - | - - - - -    | - - - - -     | - - - - - | - EENEEN -     | 80        |
| IAA30_AT3G62100                      | MEEE - - - - - | - - - - -    | - - - - -     | - - - - - | - EQNEEN -     | 78        |
| IAA31_AT3G17600                      | ARQDWPPVKS     | RLRDTLK - -  | - - - G       | - - - - - | - RRLRRG -     | 69        |
| OsiBCD001221                         | VHAD - PPIKP   | FLRSALQKAS   | AAGG          | - - - - - | - GGARRR -     | 105       |
| IAA29_AT4G32280                      | EVVGWPPVKT     | C - MIKYGSYH | HRHI          | - - - - - | - RNHHHC -     | 123       |
| IAA34_AT1G15050                      | - - - - -      | - - - - -    | - - - - -     | - - - - - | - HSSG - - - - | 79        |
| IAA32_AT2G01200                      | GLDGYGELID     | WSQPSYNSIT   | QLKS          | - - - - - | - EDTGHR -     | 83        |
| corb_UMD_Coleochaete_c11109_c_s_1    | STVCVPHV - -   | - - - - -    | - - - - -     | - - - - - | - - - - -      | 63        |
| AtIAA33                              | RDTTTFIPK      | PASKNHNSN    | SSSG          | - - - - - | - AAGRSFQ -    | 58        |
| AT3G24650                            | MARQRRLSH      | HHRHNNNNNN   | NNNN          | - - - - - | - QQNQ - - - - | 490       |
| AT1G19850.1_MP                       | NLSQS - MSA    | PAKPENSTLS   | GCSSGRVQH     | LEQSMEQAS | - - - - -      | 552       |
| Consensus                            | V - VGWPPV - - | - RSYRKNMMA  | N - K - - - - | - - - - - | - - - - -      | - - - - - |

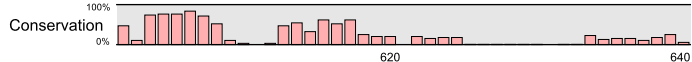

|                                      |               |             |              |            |             |        |       |       |
|--------------------------------------|---------------|-------------|--------------|------------|-------------|--------|-------|-------|
| IAA7_AT3G23050                       | - - - - -     | ASSEKAG     | NFGGAAGA -   | - - -      | GLVKVS      | 129    |       |       |
| IAA14_AT4G14550                      | - - - - -     | AMSS - -    | - GGGTVA -   | - - -      | FVKVS       | 115    |       |       |
| IAA16_AT3G04730                      | - - - - -     | GNDKTSG     | SSGATSSASA   | CATVA      | YVKVS       | 123    |       |       |
| Pt205684_gw1.V.1085.1                | - - - - -     | STDKVP -    | - GGNAT -    | - - -      | FVKVS       | 114    |       |       |
| AXR3_AT1G04250                       | - - - - -     | A - - - -   | - - - - -    | - - -      | AFVKVS      | 115    |       |       |
| PAP2_AT4G29080                       | - - - - -     | TEEA EAK    | S - - - -    | GP         | EQPCLYVKVS  | 189    |       |       |
| Pt171693_gw1.I.293.1                 | - - - - -     | VD - - -    | K S - - -    | G -        | YGYLYVKVS   | 172    |       |       |
| OsiBCD000843                         | - - - - -     | VD - - -    | AK Q - - -   | G -        | QGFLYV - VS | 162    |       |       |
| IAA8_AT2G22670                       | - - - - -     | VD - - -    | GK P - - -   | G -        | GLFLVKVS    | 203    |       |       |
| IAA9_AT5G65670                       | - - - - -     | VD - - -    | GR P - - -   | G -        | SGALFVKVS   | 220    |       |       |
| IAA2_AT3G23030                       | - - - - -     | - - - - -   | - - - - -    | - - -      | YVVS        | 82     |       |       |
| IAA1_AT4G14560                       | - - - - -     | - - - - -   | - - - - -    | - - -      | YVKV -      | 79     |       |       |
| SHY2_AT1G04240                       | - - - - -     | I - - - -   | - - - - -    | - - -      | YVKVS       | 97     |       |       |
| IAA15_AT1G80390                      | - - - - -     | - - - - -   | - - - - -    | - - -      | YVKVA       | 91     |       |       |
| IAA6_AT1G52830                       | - - - - -     | - - - - -   | - - - - -    | - - -      | IYVKVS      | 98     |       |       |
| IAA19_AT3G15540                      | - - - - -     | - - - - -   | - - - - -    | - - -      | KVGLYVKVS   | 101    |       |       |
| Pt180980_gw1.I.9580.1                | - - - - -     | - - - - -   | - - - - -    | - - -      | ETSKLYVKVS  | 61     |       |       |
| Pt180995_gw1.I.9595.1                | - - - - -     | - - - - -   | - - - - -    | - - -      | ETSKLYVKVS  | 61     |       |       |
| IAA5_AT1G15580                       | - - - - -     | - - - - -   | - - - - -    | - - -      | YVKVS       | 80     |       |       |
| Pp164608_estExt_fgenesh1_pg.C_730007 | - - - - -     | RSVPMPR     | RGASSSSSGN   | - - -      | LVKIY       | 367    |       |       |
| Pp219923_estExt_Genewise1.C_1840013  | - - - - -     | PSVQ - R    | KGASTSSSGN   | - - -      | LVKIY       | 379    |       |       |
| OsiBCD000527                         | - - - - -     | - - - - -   | - - - - -    | - - -      | FVKVA       | 98     |       |       |
| IAA12_AT1G04550                      | - - - - -     | EGDG        | EKKVYKDEI    | KDYSMKVNP  | VQG         | GFVKVN | 129   |       |
| IAA13_AT2G33310                      | - - - - -     | EEAG        | KKKV - KDDEP | KDVTKKVNG  | VQ - V      | GFVKVN | 133   |       |
| IAA11_AT4G28640                      | - - - - -     | DPNL        | EISQAVNKNR   | SDSTKMRNSM | - - -       | FVKVT  | 141   |       |
| IAA10_AT1G04100                      | G LSSG        | LQKET       | TKSVVAAKN    | DDACFJKSSR | TSM -       | VKVT   | 156   |       |
| IAA18_AT1G51950                      | SNGVTL        | KNQK        | C - - - -    | DAAAKTTEPK | RQGM        | FVKIN  | 154   |       |
| PAP1_AT3G16500                       | GGQIN - - -   | K S - - -   | - - - - -    | DDGEKQVETK | KEG -       | MVKIN  | 156   |       |
| OsiBCD000591                         | SSS - - - -   | PQN G - - - | - - - - -    | DKASKDGGAE | K -         | GMVKIN | 121   |       |
| IAA29_AT5G25890                      | - - - - -     | - - - - -   | - - - - -    | - - -      | KKESDEE     | KE -   | YVKIN | 85    |
| IAA20_AT2G46990                      | YGSF - - - -  | - - - - -   | - - - - -    | - - -      | - - - - -   | - - -  | YVKVN | 89    |
| IAA30_AT3G62100                      | SVSF - - - -  | - - - - -   | - - - - -    | - - -      | - - - - -   | - - -  | YVKVN | 87    |
| IAA31_AT3G17600                      | DTSL - - - -  | - - - - -   | - - - - -    | - - -      | - - - - -   | - - -  | FVKVY | 78    |
| OsiBCD001221                         | - RTL - - - - | - - - - -   | - - - - -    | - - -      | - - - - -   | - - -  | FVKVY | 113   |
| IAA29_AT4G32280                      | HHRGRRITAM    | NNNISNPTTA  | TMGSSSSSS    | SSRSSMYKVV | - - -       | - - -  | - - - | 163   |
| IAA34_AT1G15050                      | Q - YCSNEG YR | R - K - - - | - - - - -    | - - -      | - - -       | - - -  | - - - | 97    |
| IAA32_AT2G01200                      | QGYVNNEGES    | RGK - - - - | - - - - -    | - - -      | - - -       | - - -  | - - - | 103   |
| corb_UMD_Coleochaete_c11109_c_s_1    | - - - - -     | - - - - -   | - - - - -    | - - -      | - - -       | - - -  | - - - | 67    |
| AtIAA33                              | FGLNVEDDLV    | SSVYPP - -  | - - - - -    | - - -      | - - -       | - - -  | - - - | 78    |
| AT3G24650                            | TQIGETCAA     | APQL - NPVA | TTATGGTWMY   | WPNVPAVPPQ | - - -       | - - -  | - - - | 528   |
| AT1G19850.1_MP                       | VTTSTV CNEK   | VNQLLQKPGA  | SSPVQADQCL   | DITHIQPQ   | - - -       | - - -  | - - - | 592   |
| Consensus                            | - - - - -     | - - - - -   | - - - - -    | - - -      | - - -       | - - -  | - - - | YVKVS |

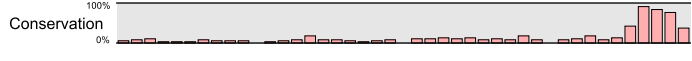

660 680

IAA7\_AT3G23050 MDGAPYLRLKV DLKMYKS - - - YQDLSDAIA -KMFSS - - - F 160  
 IAA14\_AT4G14550 MDGAPYLRLKV DLKMYTS - - - YKDLSDAIA -KMFSS - - - F 147  
 IAA16\_AT3G04730 MDGAPYLRLKI DLKLYKT - - - YQDLSNAIA -KMFSS - - - F 155  
 Pt205684\_gw1.V.1085.1 MDGAPYLRLKI DLKMYKT - - - YHFLSDAIA -KMFSS - - - F 146  
 AXR3\_AT1G04250 MDGAPYLRLKI DLRLMYKS - - - YDELSNAIA -NMFSS - - - F 147  
 PAP2\_AT4G29080 MEGAPYLRLKI DLKTYKS - - - YLELSSALE -KMFSS - - - F 221  
 Pt171693\_gw1.I.293.1 MDGAPYLRLKI DLKTYGN - - - YLELSSALE -KMFSS - - - F 204  
 OsIBCD000843 MDGAPYLRLKV DLKTYKN - - - YKDMSLGE -KMFSS - - - F 194  
 IAA8\_AT2G22670 MDGAPYLRLKV DLRTYTS - - - YQLLSSALE -KMFSS - - - F 235  
 IAA9\_AT5G65670 MDGAPYLRLKV DLRSYTN - - - YGE-SSALE -KMFSS - - - F 251  
 IAA2\_AT3G23030 MDGAPYLRLKI DLKTYKN - - - YPELLKALE -NMFSS - - - V 113  
 IAA1\_AT4G14560 SDGAPYLRLKI DLKMYKN - - - YPELLKALE -NMFSS - - - F 110  
 SHY2\_AT1G04240 MDGAPYLRLKI DLSCYKG - - - YSELLKALE -NMFSS - - - F 128  
 IAA15\_AT1G80390 LDGAAYLRLKV DLGMYDC - - - YQLLFTALE -NMFSS - - - I 123  
 IAA6\_AT1G52830 MDGAPYLRLKI DLGSSNS - - - YINLVTLE -NMFSS - - - L 130  
 IAA19\_AT3G15540 MDGAPYLRLKM DLGSSQG - - - YDDLAFALD -KLFSS - - - R 133  
 Pt180980\_gw1.I.9580.1 MDGAPYLRLKV DLGMHKE - - - Y-SLVVALE -KLFSS - - - F 92  
 Pt180995\_gw1.I.9595.1 MDGAPYLRLKV DLGMHKE - - - Y-SLVVALE -KLFSS - - - F 92  
 IAA5\_AT1G15580 -DGAAYLRLKI DLEMYKC - - - YQDLASALQ -LFLSS - - - Y 111  
 Pp164608\_estExt\_fgenesh1\_pg\_C\_730007 MDGVPFGRKVI DLKTNNS - - - YEKLYTLE -DMFSS - - - Y 399  
 Pp219923\_estExt\_Genewise1.C\_1840013 MDGVPFGRKVI DLKTNDS - - - YDKLSM-LE -DMFSS - - - Y 410  
 OsIBCD000527 VDGAPYLRLKV DLEAYSG - - - YDQLLRLAQ DKFFSS - - - F 131  
 IAA12\_AT1G04550 MDGVPFGRKVI DMRAHSS - - - YENLAQLE EMFSS - - - F 159  
 IAA13\_AT2G33310 MDGVPFGRKVI DLNAHSS - - - YENLAQLE DFFSS - - - R 163  
 IAA11\_AT4G28640 MDGVPFGRKVI DLNAHCK - - - YELSNLE EMFLK - - - PK 173  
 IAA10\_AT1G04100 MDGVPFGRKVI DLNALDS - - - YAALEKTLD LMFQIPSPV 191  
 IAA18\_AT1G51950 MYGVPFGRKVI DLSAHNS - - - YEQLSFTVD KLFGRGLAAQ 189  
 PAP1\_AT3G16500 MDGVPFGRKVI DLNAYNS - - - YEQLSFTVD KLFGRGLAAQ 191  
 OsIBCD000591 MDGVPFGRKVI DLTAYGG - - - YAQLSAARD KLFGRGLAAQ 157  
 IAA29\_AT5G25890 MEGVPFGRKVI NLSAYNN - - - YQLLSHAVD QLFSS - - - SK 116  
 IAA20\_AT2G46990 MEGVPFGRKVI DLMSLNG - - - YRDLIRTLD LMFQIPSPV 124  
 IAA30\_AT3G62100 MEGVPFGRKVI DLLSLNG - - - YHDLITLTD -YMFNASILW 122  
 IAA31\_AT3G17600 MEVPFGRKVI DLVFSFG - - - YESLLENLS -HMFDTSLIC 112  
 OsIBCD001221 MEGVPFGRKVI DLLLLDG - - - YDSLKLCLE -HMFKTPITY 148  
 IAA29\_AT4G32280 MDGVPFGRKVI DLKLFNS - - - YESLNTSL - - - - - ITMF 192  
 IAA34\_AT1G15050 MDGLVYGRKVI CVDLHGS - - - YSTLAHQLE DMFSS - - - 126  
 IAA32\_AT2G01200 LDGLVYGRKVI CLVDQGA - - - YATLALQLN DMFSS - - - 132  
 corb\_UMD\_Coleochaete\_c11109\_c\_s\_1 VDGHPGCVYV TIHPSSD - - - YLRFYTSIR EALTGCALRT 103  
 AtIAA33 LEGRSICQRIL SLDKHS - - - YQSLASALR QMFVDGADST 114  
 AT3G24650 LPPV - - - -M ETQLPT - - - - - MDRAGS - - - - - ASAMP 550  
 AT1G19850.1\_MP SDPILNGFSFL ETDELTSQVS SFSQSLAGSYK QPFILSSQDS 632  
 Consensus MDGAPYLRLKV DLKXYKS - - - YEDLSSALE -KMFSS - - - F

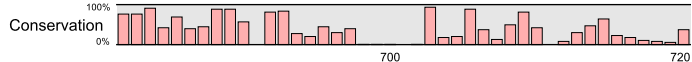

700 720

IAA7\_AT3G23050 T-MGNVGAQ- GM-ID--FMN ESKL----- 179  
 IAA14\_AT4G14550 T-MGSGAQ- GM-ID--F-N ESKV----- 165  
 IAA16\_AT3G04730 T-IGNV-PQ- GM-KD--FMN ESKL----- 173  
 Pt205684\_gw1.V.1085.1 T-IGNCGSH- GM-KD--FL- ESKL----- 164  
 AXR3\_AT1G04250 T-MGKHGGE- GM-ID--MN ERKL----- 166  
 PAP2\_AT4G29080 T-IGQEGSHG GCGRD--GLN E-SL----- 241  
 Pt171693\_gw1.I.293.1 T-IGQCGSHG LAARD--GLT E-SC----- 224  
 OsIBCD000843 S-TGKGAEN - - - QKD - G - - - - - 207  
 IAA8\_AT2G22670 T-LGQC-LHG AQQRE - RMS EIKL----- 255  
 IAA9\_AT5G65670 T-LGQCGSNG AAGKD - MLS ETKL----- 272  
 IAA2\_AT3G23030 M-IGEYCERE G - - - - - - - - - - - 123  
 IAA1\_AT4G14560 T-VGEYSERE G - - - - - - - - - - - 120  
 SHY2\_AT1G04240 S-VGEYFERD G - - - - - - - - - - - 138  
 IAA15\_AT1G80390 - - - - - - - - - - - ITICRV----- 129  
 IAA6\_AT1G52830 -GIGVA-KEG - - - - - - - - - - - 138  
 IAA19\_AT3G15540 -GIGVALKDG - - - - - - - - - - - 142  
 Pt180980\_gw1.I.9580.1 -GIGVALKDT - - - - - - - - - - - 101  
 Pt180995\_gw1.I.9595.1 -GIGVALKDT - - - - - - - - - - - 101  
 IAA5\_AT1G15580 INFDDTLKES - - - - - - - - - - - 121  
 Pp164608\_estExt\_fgenesh1\_pg\_C\_730007 IV-HGCGGRS SSCGDSHSLA SSRK----- 422  
 Pp219923\_estExt\_Genewise1.C\_1840013 ISGQYCGGRS SSSGESHWVA SSRK----- 434  
 OsIBCD000527 TILPLDGRKVA GKFAAD - - - - - ERKL----- 151  
 IAA12\_AT1G04550 - - - - - GT - - - - - - - - - - - 161  
 IAA13\_AT2G33310 TNPGTVGLTS QFTKPLRL - D - - - - - 183  
 IAA11\_AT4G28640 LGSRTLETDG HMETPVKILP - D - - - - - 194  
 IAA10\_AT1G04100 TRSNTQGYKT IKETCTSKL - D - - - - - 212  
 IAA18\_AT1G51950 RDFPSSLEDE KPIITG - - - - - 205  
 PAP1\_AT3G16500 RDISDQGQEE KPIITG - - - - - 207  
 OsIBCD000591 -SAADGEADA AA-AGE - - - - - 171  
 IAA29\_AT5G25890 KDSWD - - - - - - - - - - - 122  
 IAA20\_AT2G46990 AEEED - - - - - - - - - - - 129  
 IAA30\_AT3G62100 AEEED - - - - - - - - - - - 127  
 IAA31\_AT3G17600 GNRDRKH - - - - - - - - - - - 119  
 OsIBCD001221 ADVMECHQQ - - - - - - - - - - - 157  
 IAA29\_AT4G32280 TEYEDCDRE - - - - - - - - - - - 201  
 IAA34\_AT1G15050 - - - - - GMQS VSGL----- 134  
 IAA32\_AT2G01200 - - - - - GMQT VSGL----- 140  
 corb\_UMD\_Coleochaete\_c11109\_c\_s\_1 PEKIPQHPPD SPQNVIP - - - - - 120  
 AtIAA33 DDLDSNAIP G - - - - - - - - - - - 125  
 AT3G24650 RQQVVPDRRQ G - - - - WKPE KN-LRF - - - - - 574  
 AT1G19850.1\_MP SAVVLPDSNS PLFHDVWDTQ LNLKFDQFS PLMQQDLYAS 672  
 Consensus T-IGDCG - - - - - - - - - - -

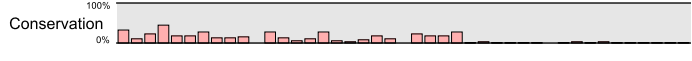



|                                      | 740                                                                                                                                                                                                                                                             | 760   |       |
|--------------------------------------|-----------------------------------------------------------------------------------------------------------------------------------------------------------------------------------------------------------------------------------------------------------------|-------|-------|
| IAA7_AT3G23050                       | -----                                                                                                                                                                                                                                                           | ----- | 179   |
| IAA14_AT4G14550                      | -----                                                                                                                                                                                                                                                           | ----- | 165   |
| IAA16_AT3G04730                      | -----                                                                                                                                                                                                                                                           | ----- | 173   |
| Pt205684_gw1.V.1085.1                | -----                                                                                                                                                                                                                                                           | ----- | 164   |
| AXR3_AT1G04250                       | -----                                                                                                                                                                                                                                                           | ----- | 166   |
| PAP2_AT4G29080                       | -----                                                                                                                                                                                                                                                           | ----- | 241   |
| Pt171693_gw1.I.293.1                 | -----                                                                                                                                                                                                                                                           | ----- | 224   |
| OsIBCD000843                         | -----                                                                                                                                                                                                                                                           | ----- | 207   |
| IAA8_AT2G22670                       | -----                                                                                                                                                                                                                                                           | ----- | 255   |
| IAA9_AT5G65670                       | -----                                                                                                                                                                                                                                                           | ----- | 272   |
| IAA2_AT3G23030                       | -----                                                                                                                                                                                                                                                           | ----- | 123   |
| IAA1_AT4G14560                       | -----                                                                                                                                                                                                                                                           | ----- | 120   |
| SHY2_AT1G04240                       | -----                                                                                                                                                                                                                                                           | ----- | 138   |
| IAA15_AT1G80390                      | -----                                                                                                                                                                                                                                                           | ----- | 129   |
| IAA6_AT1G52830                       | -----                                                                                                                                                                                                                                                           | ----- | 138   |
| IAA19_AT3G15540                      | -----                                                                                                                                                                                                                                                           | ----- | 142   |
| Pt180980_gw1.I.9580.1                | -----                                                                                                                                                                                                                                                           | ----- | 101   |
| Pt180995_gw1.I.9595.1                | -----                                                                                                                                                                                                                                                           | ----- | 101   |
| IAA5_AT1G15580                       | -----                                                                                                                                                                                                                                                           | ----- | 121   |
| Pp164608_estExt_fgenesh1_pg.C_730007 | -----                                                                                                                                                                                                                                                           | ----- | 422   |
| Pp219923_estExt_Genewise1.C_1840013  | -----                                                                                                                                                                                                                                                           | ----- | 434   |
| OsIBCD000527                         | -----                                                                                                                                                                                                                                                           | ----- | 151   |
| IAA12_AT1G04550                      | -----                                                                                                                                                                                                                                                           | ----- | 161   |
| IAA13_AT2G33310                      | -----                                                                                                                                                                                                                                                           | ----- | 183   |
| IAA11_AT4G28640                      | -----                                                                                                                                                                                                                                                           | ----- | 194   |
| IAA10_AT1G04100                      | -----                                                                                                                                                                                                                                                           | ----- | 212   |
| IAA18_AT1G51950                      | -----                                                                                                                                                                                                                                                           | ----- | 205   |
| PAP1_AT3G16500                       | -----                                                                                                                                                                                                                                                           | ----- | 207   |
| OsIBCD000591                         | -----                                                                                                                                                                                                                                                           | ----- | 171   |
| IAA29_AT5G25890                      | -----                                                                                                                                                                                                                                                           | ----- | 122   |
| IAA20_AT2G46990                      | -----                                                                                                                                                                                                                                                           | ----- | 129   |
| IAA30_AT3G62100                      | -----                                                                                                                                                                                                                                                           | ----- | 127   |
| IAA31_AT3G17600                      | -----                                                                                                                                                                                                                                                           | ----- | 119   |
| OsIBCD001221                         | -----                                                                                                                                                                                                                                                           | ----- | 157   |
| IAA29_AT4G32280                      | -----                                                                                                                                                                                                                                                           | ----- | 201   |
| IAA34_AT1G15050                      | -----                                                                                                                                                                                                                                                           | ----- | 134   |
| IAA32_AT2G01200                      | -----                                                                                                                                                                                                                                                           | ----- | 140   |
| corb_UMD_Coleochaete_c11109_c_s_1    | -----                                                                                                                                                                                                                                                           | ----- | 120   |
| AtIAA33                              | -----                                                                                                                                                                                                                                                           | ----- | 125   |
| AT3G24650                            | -----                                                                                                                                                                                                                                                           | ----- | 583   |
| AT1G19850.1_MP                       | <b>QNI</b> <b>CMS</b> <b>NSTT</b> <b>SNI</b> <b>LD</b> <b>PPL</b> <b>SN</b> <b>T</b> <b>V</b> <b>L</b> <b>D</b> <b>D</b> <b>F</b> <b>C</b> <b>A</b> <b>I</b> <b>K</b> <b>D</b> <b>T</b> <b>D</b> <b>F</b> <b>Q</b> <b>N</b> <b>H</b> <b>P</b> <b>S</b> <b>G</b> |       | 712   |
| Consensus                            | -----                                                                                                                                                                                                                                                           | ----- | ----- |

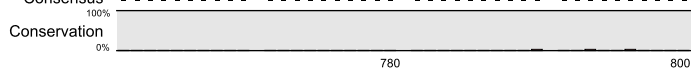

|                                      | 780                                                                                                                                                                                                                                                                                                                                                    | 800   |       |
|--------------------------------------|--------------------------------------------------------------------------------------------------------------------------------------------------------------------------------------------------------------------------------------------------------------------------------------------------------------------------------------------------------|-------|-------|
| IAA7_AT3G23050                       | -----                                                                                                                                                                                                                                                                                                                                                  | ----- | 206   |
| IAA14_AT4G14550                      | -----                                                                                                                                                                                                                                                                                                                                                  | ----- | 192   |
| IAA16_AT3G04730                      | -----                                                                                                                                                                                                                                                                                                                                                  | ----- | 200   |
| Pt205684_gw1.V.1085.1                | -----                                                                                                                                                                                                                                                                                                                                                  | ----- | 191   |
| AXR3_AT1G04250                       | -----                                                                                                                                                                                                                                                                                                                                                  | ----- | 193   |
| PAP2_AT4G29080                       | -----                                                                                                                                                                                                                                                                                                                                                  | ----- | 268   |
| Pt171693_gw1.I.293.1                 | -----                                                                                                                                                                                                                                                                                                                                                  | ----- | 250   |
| OsIBCD000843                         | -----                                                                                                                                                                                                                                                                                                                                                  | ----- | 227   |
| IAA8_AT2G22670                       | -----                                                                                                                                                                                                                                                                                                                                                  | ----- | 282   |
| IAA9_AT5G65670                       | -----                                                                                                                                                                                                                                                                                                                                                  | ----- | 299   |
| IAA2_AT3G23030                       | -----                                                                                                                                                                                                                                                                                                                                                  | ----- | 147   |
| IAA1_AT4G14560                       | -----                                                                                                                                                                                                                                                                                                                                                  | ----- | 144   |
| SHY2_AT1G04240                       | -----                                                                                                                                                                                                                                                                                                                                                  | ----- | 161   |
| IAA15_AT1G80390                      | -----                                                                                                                                                                                                                                                                                                                                                  | ----- | 156   |
| IAA6_AT1G52830                       | -----                                                                                                                                                                                                                                                                                                                                                  | ----- | 160   |
| IAA19_AT3G15540                      | -----                                                                                                                                                                                                                                                                                                                                                  | ----- | 164   |
| Pt180980_gw1.I.9580.1                | -----                                                                                                                                                                                                                                                                                                                                                  | ----- | 124   |
| Pt180995_gw1.I.9595.1                | -----                                                                                                                                                                                                                                                                                                                                                  | ----- | 124   |
| IAA5_AT1G15580                       | -----                                                                                                                                                                                                                                                                                                                                                  | ----- | 141   |
| Pp164608_estExt_fgenesh1_pg.C_730007 | -----                                                                                                                                                                                                                                                                                                                                                  | ----- | 449   |
| Pp219923_estExt_Genewise1.C_1840013  | -----                                                                                                                                                                                                                                                                                                                                                  | ----- | 461   |
| OsIBCD000527                         | -----                                                                                                                                                                                                                                                                                                                                                  | ----- | 177   |
| IAA12_AT1G04550                      | -----                                                                                                                                                                                                                                                                                                                                                  | ----- | 161   |
| IAA13_AT2G33310                      | -----                                                                                                                                                                                                                                                                                                                                                  | ----- | 206   |
| IAA11_AT4G28640                      | -----                                                                                                                                                                                                                                                                                                                                                  | ----- | 217   |
| IAA10_AT1G04100                      | -----                                                                                                                                                                                                                                                                                                                                                  | ----- | 235   |
| IAA18_AT1G51950                      | -----                                                                                                                                                                                                                                                                                                                                                  | ----- | 230   |
| PAP1_AT3G16500                       | -----                                                                                                                                                                                                                                                                                                                                                  | ----- | 232   |
| OsIBCD000591                         | -----                                                                                                                                                                                                                                                                                                                                                  | ----- | 196   |
| IAA29_AT5G25890                      | -----                                                                                                                                                                                                                                                                                                                                                  | ----- | 144   |
| IAA20_AT2G46990                      | -----                                                                                                                                                                                                                                                                                                                                                  | ----- | 154   |
| IAA30_AT3G62100                      | -----                                                                                                                                                                                                                                                                                                                                                  | ----- | 152   |
| IAA31_AT3G17600                      | -----                                                                                                                                                                                                                                                                                                                                                  | ----- | 138   |
| OsIBCD001221                         | -----                                                                                                                                                                                                                                                                                                                                                  | ----- | 180   |
| IAA29_AT4G32280                      | -----                                                                                                                                                                                                                                                                                                                                                  | ----- | 223   |
| IAA34_AT1G15050                      | -----                                                                                                                                                                                                                                                                                                                                                  | ----- | 160   |
| IAA32_AT2G01200                      | -----                                                                                                                                                                                                                                                                                                                                                  | ----- | 166   |
| corb_UMD_Coleochaete_c11109_c_s_1    | -----                                                                                                                                                                                                                                                                                                                                                  | ----- | 140   |
| AtIAA33                              | -----                                                                                                                                                                                                                                                                                                                                                  | ----- | 144   |
| AT3G24650                            | -----                                                                                                                                                                                                                                                                                                                                                  | ----- | 614   |
| AT1G19850.1_MP                       | <b>CL</b> <b>V</b> <b>G</b> <b>N</b> <b>N</b> <b>T</b> <b>F</b> <b>A</b> <b>Q</b> <b>D</b> <b>V</b> <b>Q</b> <b>S</b> <b>Q</b> <b>I</b> <b>T</b> <b>S</b> <b>A</b> <b>S</b> <b>F</b> <b>A</b> <b>D</b> <b>S</b> <b>Q</b> <b>A</b> <b>F</b> <b>S</b> <b>R</b> <b>Q</b> <b>D</b> <b>F</b> <b>P</b> <b>D</b> <b>N</b> <b>S</b> <b>G</b> <b>G</b> <b>T</b> |       | 752   |
| Consensus                            | -----                                                                                                                                                                                                                                                                                                                                                  | ----- | ----- |

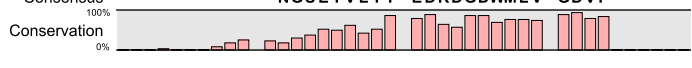

|                                      | 820        | 840        |                                 |     |
|--------------------------------------|------------|------------|---------------------------------|-----|
| IAA7_AT3G23050                       | ---        | ---        | WEMFVESC KRLRIM --- 220         |     |
| IAA14_AT4G14550                      | ---        | ---        | WPMFVESC KRLRIM --- 206         |     |
| IAA16_AT3G04730                      | ---        | ---        | WEMFVESC KRLRIM --- 214         |     |
| Pt205684_gw1.V.1085.1                | ---        | ---        | WDMFVESC KRLRIM --- 205         |     |
| AXR3_AT1G04250                       | ---        | ---        | WPMFVDTG KRLRIM --- 207         |     |
| PAP2_AT4G29080                       | ---        | ---        | WEMFVESC KRLRIM --- 282         |     |
| Pt171693_gw1.I.293.1                 | ---        | ---        | WDMFTDSC RRLRIM --- 264         |     |
| OsiBCD000843                         | ---        | ---        | WEMFTDSC RRLRI --- 240          |     |
| IAA8_AT2G22670                       | ---        | ---        | WEIFTEC QKLRIM --- 296          |     |
| IAA9_AT5G65670                       | ---        | ---        | WEMFTDVC KRLRIM --- 313         |     |
| IAA2_AT3G23030                       | ---        | ---        | WDMFSSSC KRLRIK --- 161         |     |
| IAA1_AT4G14560                       | ---        | ---        | WDMFSSSC QKLRIM --- 158         |     |
| SHY2_AT1G04240                       | ---        | ---        | WEMFVCTC KRLRIM --- 175         |     |
| IAA15_AT1G80390                      | ---        | ---        | WMMFVESC KRLRIM --- 169         |     |
| IAA6_AT1G52830                       | ---        | ---        | WQMFVESC KRLRIV --- 174         |     |
| IAA19_AT3G15540                      | ---        | ---        | WGMFVESC KRLRIM --- 178         |     |
| Pt180980_gw1.I.9580.1                | ---        | ---        | WEMFVESC KRLRIM --- 138         |     |
| Pt180995_gw1.I.9595.1                | ---        | ---        | WEMFVESC KRLRIM --- 138         |     |
| IAA5_AT1G15580                       | ---        | ---        | WEMFVESC KRLRIM --- 155         |     |
| Pp164608_estExt_fgenesh1_pg.C_730007 | ---        | ---        | WDMFVESC KRLRIM --- 463         |     |
| Pp219923_estExt_Genewise1.C_1840013  | ---        | ---        | WELFVNAV KRLRIM --- 475         |     |
| OsiBCD000527                         | ---        | ---        | WK --- 179                      |     |
| IAA12_AT1G04550                      | ---        | ---        | ---                             | 161 |
| IAA13_AT2G33310                      | ---        | ---        | WRMFINSV KRLRVM --- 220         |     |
| IAA11_AT4G28640                      | ---        | ---        | WGMFVGSV RRLRIM --- 231         |     |
| IAA10_AT1G04100                      | ---        | ---        | WQMFVLSV TRLRIM --- 248         |     |
| IAA18_AT1G51950                      | ---        | ---        | WQMFVSSV KR-RVLI --- 243        |     |
| PAP1_AT3G16500                       | ---        | ---        | WQMFVSSV RL-RVLI --- 245        |     |
| OsiBCD000591                         | ---        | ---        | WQMFVATA KRLRVL --- 210         |     |
| IAA29_AT5G25890                      | ---        | ---        | WEMFVSTV KRHLVL --- 158         |     |
| IAA20_AT2G46990                      | ---        | ---        | WEMFVLSV RRLKIS --- 167         |     |
| IAA30_AT3G62100                      | ---        | ---        | WEMFVLSV RRLKIS --- 165         |     |
| IAA31_AT3G17600                      | ---        | ---        | WDMFLETV RRLKIT --- 152         |     |
| OsiBCD001221                         | ---        | ---        | ---                             | 186 |
| IAA29_AT4G32280                      | ---        | ---        | WKIFAESV HRSIL --- 237          |     |
| IAA34_AT1G15050                      | ---        | ---        | WNEFLESV ERLRIT --- 174         |     |
| IAA32_AT2G01200                      | ---        | ---        | WKEFVESV DRMRIA --- 180         |     |
| corb_UMD_Coleochaete_c11109_c_s_1    | ---        | ---        | WRLFFQRV KRLRVVITQEP --- 158    |     |
| AtIAA33                              | ---        | ---        | WKDFVVA KRLRILPVKG --- 162      |     |
| AT3G24650                            | GTSRV      | WNNRY      | REWP --- NNK SRMYL-LENT --- 640 |     |
| AT1G19850.1_MP                       | GTSSTNVDFD | DCSLRQNSKG | SSWQKIA TPR VRTYTKVQKT --- 792  |     |
| Consensus                            | ---        | ---        | WEMFVESC KRLRIM ---             |     |

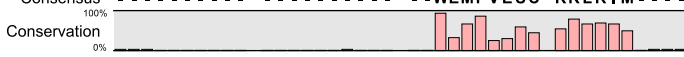

|                                      | 860         | 880        |                                                     |     |
|--------------------------------------|-------------|------------|-----------------------------------------------------|-----|
| IAA7_AT3G23050                       | ---         | ---        | KGSEAVGL A --- 229                                  |     |
| IAA14_AT4G14550                      | ---         | ---        | KGSEAVGL A --- 215                                  |     |
| IAA16_AT3G04730                      | ---         | ---        | KGSEAVGL A --- 223                                  |     |
| Pt205684_gw1.V.1085.1                | ---         | ---        | KGTEATGL A --- 214                                  |     |
| AXR3_AT1G04250                       | ---         | ---        | KGSDAIGL A --- 216                                  |     |
| PAP2_AT4G29080                       | ---         | ---        | KSSAIGL A --- 291                                   |     |
| Pt171693_gw1.I.293.1                 | ---         | ---        | KGSEAVGL A --- 273                                  |     |
| OsiBCD000843                         | ---         | ---        | KGSDAIGL GCSQL --- 253                              |     |
| IAA8_AT2G22670                       | ---         | ---        | KGSDSIGL A --- 305                                  |     |
| IAA9_AT5G65670                       | ---         | ---        | KGCDALGA AA --- 323                                 |     |
| IAA2_AT3G23030                       | ---         | ---        | GS-DAPA DSSI* --- 173                               |     |
| IAA1_AT4G14560                       | ---         | ---        | KG-EAP -TAL* --- 167                                |     |
| SHY2_AT1G04240                       | ---         | ---        | KGSEAKGL GCGV* --- 188                              |     |
| IAA15_AT1G80390                      | ---         | ---        | KTGDALGL *CG --- 178                                |     |
| IAA6_AT1G52830                       | ---         | ---        | KRSDATGF GLQ --- 185                                |     |
| IAA19_AT3G15540                      | ---         | ---        | KRSDATGF GLQPR --- 191                              |     |
| Pt180980_gw1.I.9580.1                | ---         | ---        | KRSEAKGF GLQPR --- 151                              |     |
| Pt180995_gw1.I.9595.1                | ---         | ---        | KRSEAKGF GLQPR --- 151                              |     |
| IAA5_AT1G15580                       | ---         | ---        | KRS-CNG* --- 162                                    |     |
| Pp164608_estExt_fgenesh1_pg.C_730007 | ---         | ---        | KGSEQVNL APKNP --- 476                              |     |
| Pp219923_estExt_Genewise1.C_1840013  | ---         | ---        | KGSEQ-NL APKNA --- 487                              |     |
| OsiBCD000527                         | ---         | ---        | ---                                                 | 179 |
| IAA12_AT1G04550                      | ---         | ---        | G YCF --- 166                                       |     |
| IAA13_AT2G33310                      | ---         | ---        | KTSEANGL AARNQ --- 233                              |     |
| IAA11_AT4G28640                      | ---         | ---        | KTSEATG --- 238                                     |     |
| IAA10_AT1G04100                      | ---         | ---        | KTSAGAGV G --- 257                                  |     |
| IAA18_AT1G51950                      | ---         | ---        | KTSEIS-SALTY --- 254                                |     |
| PAP1_AT3G16500                       | ---         | ---        | KSSAIS-SALTF --- 256                                |     |
| OsiBCD000591                         | ---         | ---        | KSSDLPPP SLMRA --- 223                              |     |
| IAA29_AT5G25890                      | ---         | ---        | KTH -AF --- 163                                     |     |
| IAA20_AT2G46990                      | ---         | ---        | RANYHY* --- 174                                     |     |
| IAA30_AT3G62100                      | ---         | ---        | RA-WHY* --- 171                                     |     |
| IAA31_AT3G17600                      | ---         | ---        | RPE-RY* --- 158                                     |     |
| OsiBCD001221                         | ---         | ---        | QDC-KDG --- 192                                     |     |
| IAA29_AT4G32280                      | ---         | ---        | RDRCAV --- 243                                      |     |
| IAA34_AT1G15050                      | ---         | ---        | RRNDAL --- 180                                      |     |
| IAA32_AT2G01200                      | ---         | ---        | RRNDAL --- 186                                      |     |
| corb_UMD_Coleochaete_c11109_c_s_1    | ---         | ---        | GEEGSTSPRH GREATERKLI SRGSRFLQHE DALDHNLYDM --- 198 |     |
| AtIAA33                              | ---         | ---        | NTRQV -KRNE --- 171                                 |     |
| AT3G24650                            | GDFVKTNGLQ  | EGDFIVYSD  | VKCGKYLIRG VKVR-QPSGQ --- 679                       |     |
| AT1G19850.1_MP                       | GSSVGRSIDTS | EKDYEEKLSA | IEC-MFGLLEG LLTHPQSSGW --- 831                      |     |
| Consensus                            | ---         | ---        | KGSEAVGL ---                                        |     |

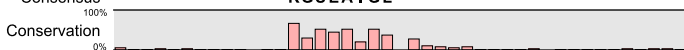

|                                      | 900   | 920   |     |
|--------------------------------------|-------|-------|-----|
| IAA7_AT3G23050                       | ----- | ----- | 229 |
| IAA14_AT4G14550                      | ----- | ----- | 215 |
| IAA16_AT3G04730                      | ----- | ----- | 223 |
| Pt205684_gw1.V.1085.1                | ----- | ----- | 214 |
| AXR3_AT1G04250                       | ----- | ----- | 216 |
| PAP2_AT4G29080                       | ----- | ----- | 291 |
| Pt171693_gw1.I.293.1                 | ----- | ----- | 273 |
| OsiBCD000843                         | ----- | ----- | 253 |
| IAA8_AT2G22670                       | ----- | ----- | 305 |
| IAA9_AT5G65670                       | ----- | ----- | 323 |
| IAA2_AT3G23030                       | ----- | ----- | 173 |
| IAA1_AT4G14560                       | ----- | ----- | 167 |
| SHY2_AT1G04240                       | ----- | ----- | 188 |
| IAA15_AT1G80390                      | ----- | ----- | 178 |
| IAA6_AT1G52830                       | ----- | ----- | 185 |
| IAA19_AT3G15540                      | ----- | ----- | 191 |
| Pt180980_gw1.I.9580.1                | ----- | ----- | 151 |
| Pt180995_gw1.I.9595.1                | ----- | ----- | 151 |
| IAA5_AT1G15580                       | ----- | ----- | 162 |
| Pp164608_estExt_fgenesh1_pg.C_730007 | ----- | ----- | 476 |
| Pp219923_estExt_Genewise1.C_1840013  | ----- | ----- | 487 |
| OsiBCD000527                         | ----- | ----- | 179 |
| IAA12_AT1G04550                      | ----- | ----- | 166 |
| IAA13_AT2G33310                      | ----- | ----- | 233 |
| IAA11_AT4G28640                      | ----- | ----- | 238 |
| IAA10_AT1G04100                      | ----- | ----- | 257 |
| IAA18_AT1G51950                      | ----- | ----- | 254 |
| PAP1_AT3G16500                       | ----- | ----- | 256 |
| OsiBCD000591                         | ----- | ----- | 223 |
| IAA29_AT5G25890                      | ----- | ----- | 163 |
| IAA20_AT2G46990                      | ----- | ----- | 174 |
| IAA30_AT3G62100                      | ----- | ----- | 171 |
| IAA31_AT3G17600                      | ----- | ----- | 158 |
| OsiBCD001221                         | ----- | ----- | 192 |
| IAA29_AT4G32280                      | ----- | ----- | 243 |
| IAA34_AT1G15050                      | ----- | ----- | 180 |
| IAA32_AT2G01200                      | ----- | ----- | 186 |
| corb_UMD_Coleochaete_c11109_c_s_1    | ----- | ----- | 224 |
| AtIAA33                              | ----- | ----- | 171 |
| AT3G24650                            | ----- | ----- | 695 |
| AT1G19850.1_MP                       | ----- | ----- | 871 |
| Consensus                            | ----- | ----- |     |

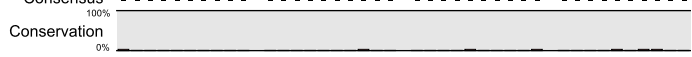

|                                      | 940   |     |
|--------------------------------------|-------|-----|
| IAA7_AT3G23050                       | ----- | 241 |
| IAA14_AT4G14550                      | ----- | 227 |
| IAA16_AT3G04730                      | ----- | 235 |
| Pt205684_gw1.V.1085.1                | ----- | 225 |
| AXR3_AT1G04250                       | ----- | 228 |
| PAP2_AT4G29080                       | ----- | 303 |
| Pt171693_gw1.I.293.1                 | ----- | 284 |
| OsiBCD000843                         | ----- | 263 |
| IAA8_AT2G22670                       | ----- | 319 |
| IAA9_AT5G65670                       | ----- | 335 |
| IAA2_AT3G23030                       | ----- | 173 |
| IAA1_AT4G14560                       | ----- | 167 |
| SHY2_AT1G04240                       | ----- | 188 |
| IAA15_AT1G80390                      | ----- | 178 |
| IAA6_AT1G52830                       | ----- | 188 |
| IAA19_AT3G15540                      | ----- | 196 |
| Pt180980_gw1.I.9580.1                | ----- | 156 |
| Pt180995_gw1.I.9595.1                | ----- | 156 |
| IAA5_AT1G15580                       | ----- | 162 |
| Pp164608_estExt_fgenesh1_pg.C_730007 | ----- | 486 |
| Pp219923_estExt_Genewise1.C_1840013  | ----- | 498 |
| OsiBCD000527                         | ----- | 179 |
| IAA12_AT1G04550                      | ----- | 172 |
| IAA13_AT2G33310                      | ----- | 244 |
| IAA11_AT4G28640                      | ----- | 244 |
| IAA10_AT1G04100                      | ----- | 259 |
| IAA18_AT1G51950                      | ----- | 265 |
| PAP1_AT3G16500                       | ----- | 267 |
| OsiBCD000591                         | ----- | 234 |
| IAA29_AT5G25890                      | ----- | 174 |
| IAA20_AT2G46990                      | ----- | 174 |
| IAA30_AT3G62100                      | ----- | 171 |
| IAA31_AT3G17600                      | ----- | 158 |
| OsiBCD001221                         | ----- | 192 |
| IAA29_AT4G32280                      | ----- | 249 |
| IAA34_AT1G15050                      | ----- | 184 |
| IAA32_AT2G01200                      | ----- | 190 |
| corb_UMD_Coleochaete_c11109_c_s_1    | ----- | 249 |
| AtIAA33                              | ----- | 171 |
| AT3G24650                            | ----- | 720 |
| AT1G19850.1_MP                       | ----- | 892 |
| Consensus                            | ----- |     |

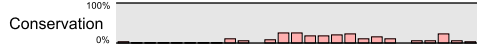

Figure S29 - alignment of ARFs and putative orthologs

|                                               |                                                                                                                                                                                                                                                                               |           |                                                                                                               |                                       |
|-----------------------------------------------|-------------------------------------------------------------------------------------------------------------------------------------------------------------------------------------------------------------------------------------------------------------------------------|-----------|---------------------------------------------------------------------------------------------------------------|---------------------------------------|
| Phypha1_1_168019_estExt_fgenesh1_pg.C_1630077 | <b>M</b> <b>K</b> <b>W</b> <b>T</b> <b>P</b> <b>V</b> <b>S</b> <b>N</b> - -                                                                                                                                                                                                   | - - - - - | - - - - -                                                                                                     | 8                                     |
| Phypha_218828                                 | <b>M</b> - - - - -                                                                                                                                                                                                                                                            | - - - - - | - - - - -                                                                                                     | 1                                     |
| Phypha1_1_127416_e_gw1.65.212.1               | <b>L</b> <b>A</b> - - - - -                                                                                                                                                                                                                                                   | - - - - - | - - - - -                                                                                                     | 2                                     |
| Phypha1_1_50215_gw1.6.284.1                   | - - - - -                                                                                                                                                                                                                                                                     | - - - - - | - - - - -                                                                                                     | -                                     |
| Phypha_167026                                 | <b>M</b> <b>T</b> <b>T</b> <b>D</b> <b>V</b> <b>V</b> <b>K</b> <b>K</b> <b>K</b> <b>K</b> <b>K</b> <b>K</b> <b>T</b> <b>R</b> <b>G</b> <b>R</b> <b>K</b> <b>G</b> <b>G</b> <b>R</b> <b>E</b> <b>R</b> <b>R</b> <b>E</b> <b>R</b> <b>E</b> <b>R</b> <b>R</b> <b>G</b>          | - - - - - | - - - - -                                                                                                     | 30                                    |
| Phypha1_1_136986_e_gw1.133.91.1               | - - - - -                                                                                                                                                                                                                                                                     | - - - - - | - - - - -                                                                                                     | -                                     |
| Phypha_188433                                 | <b>M</b> <b>P</b> - - - - -                                                                                                                                                                                                                                                   | - - - - - | - - - - -                                                                                                     | 2                                     |
| Phypha_165321                                 | <b>M</b> <b>V</b> - - - - -                                                                                                                                                                                                                                                   | - - - - - | - - - - -                                                                                                     | 2                                     |
| ARF8_AT5G37020                                | <b>M</b> <b>K</b> <b>L</b> <b>S</b> <b>T</b> <b>S</b> <b>G</b> <b>L</b> <b>G</b> <b>Q</b> <b>Q</b> <b>G</b> - - - - -                                                                                                                                                         | - - - - - | - - - - -                                                                                                     | 12                                    |
| Pt198791_gw1.IV.3880.1                        | <b>E</b> <b>K</b> - - - - -                                                                                                                                                                                                                                                   | - - - - - | - - - - -                                                                                                     | 2                                     |
| ARF6_AT1G30330                                | <b>M</b> <b>R</b> <b>L</b> <b>S</b> <b>S</b> <b>A</b> <b>G</b> <b>F</b> <b>N</b> <b>P</b> <b>Q</b> <b>P</b> - - - - -                                                                                                                                                         | - - - - - | - - - - -                                                                                                     | 12                                    |
| Pt205407_gw1.V.808.1                          | - - - - -                                                                                                                                                                                                                                                                     | - - - - - | - - - - -                                                                                                     | -                                     |
| Selmo1_117217_e_gw1.55.235.1                  | <b>M</b> <b>L</b> <b>A</b> <b>E</b> <b>L</b> <b>G</b> <b>V</b> <b>Y</b> <b>Q</b> <b>S</b> <b>S</b> <b>K</b> <b>P</b> <b>Q</b> <b>C</b> <b>F</b> <b>T</b> - - - - -                                                                                                            | - - - - - | - - - - -                                                                                                     | 17                                    |
| Selmo1_422125                                 | <b>M</b> - - - - -                                                                                                                                                                                                                                                            | - - - - - | - - - - -                                                                                                     | 1                                     |
| Selmo1_424114_fgenesh2_pg.C_scaffold_65000063 | <b>M</b> <b>N</b> <b>T</b> <b>E</b> <b>M</b> <b>E</b> <b>G</b> - - - - -                                                                                                                                                                                                      | - - - - - | - - - - -                                                                                                     | 7                                     |
| Selmo1_446535                                 | <b>M</b> <b>N</b> <b>T</b> <b>E</b> <b>M</b> <b>E</b> <b>G</b> - - - - -                                                                                                                                                                                                      | - - - - - | - - - - -                                                                                                     | 7                                     |
| Selmo1_181406_estExt_Genewise1Plus.C_650169   | <b>M</b> <b>N</b> <b>C</b> <b>L</b> <b>L</b> - <b>A</b> - - - - -                                                                                                                                                                                                             | - - - - - | - - - - -                                                                                                     | 6                                     |
| ARF19_AT1G19220                               | <b>M</b> <b>K</b> <b>A</b> - - - - -                                                                                                                                                                                                                                          | - - - - - | - - - - -                                                                                                     | 3                                     |
| ARF7_AT5G20730                                | <b>M</b> <b>K</b> <b>A</b> - - - - -                                                                                                                                                                                                                                          | - - - - - | - - - - -                                                                                                     | 3                                     |
| ZmGRMZM2G014864_P01                           | <b>M</b> - - - - -                                                                                                                                                                                                                                                            | - - - - - | - - - - -                                                                                                     | 1                                     |
| ARF5_AT1G19850                                | <b>M</b> <b>M</b> <b>A</b> <b>S</b> <b>L</b> <b>S</b> <b>C</b> <b>V</b> <b>E</b> <b>D</b> <b>K</b> <b>M</b> <b>K</b> <b>T</b> <b>S</b> <b>C</b> <b>L</b> <b>V</b> <b>N</b> <b>G</b> <b>G</b> <b>G</b> <b>T</b> <b>T</b> <b>T</b> <b>T</b> <b>S</b> <b>Q</b>                   | - - - - - | - - - - -                                                                                                     | 30                                    |
| Selmo1_437944_estExt_fgenesh2_pg.C_10526      | <b>M</b> <b>L</b> <b>S</b> <b>S</b> <b>S</b> <b>Q</b> <b>T</b> <b>Y</b> <b>G</b> <b>Q</b> <b>L</b> <b>G</b> <b>T</b> <b>M</b> <b>M</b> <b>H</b> <b>R</b> <b>P</b> <b>T</b> <b>P</b> <b>Q</b> <b>R</b> - - - - -                                                               | - - - - - | - - - - -                                                                                                     | 22                                    |
| all_Phypha_77324                              | <b>M</b> - - - - -                                                                                                                                                                                                                                                            | - - - - - | - - - - -                                                                                                     | 1                                     |
| all_Phypha_159688                             | <b>M</b> - - - - -                                                                                                                                                                                                                                                            | - - - - - | - - - - -                                                                                                     | 1                                     |
| all_Phypha_225990                             | <b>M</b> - - - - -                                                                                                                                                                                                                                                            | - - - - - | - - - - -                                                                                                     | 1                                     |
| all_Phypha_171197                             | <b>M</b> - - - - -                                                                                                                                                                                                                                                            | - - - - - | - - - - -                                                                                                     | 1                                     |
| Pt179921_gw1.I.8521.1                         | - - - - -                                                                                                                                                                                                                                                                     | - - - - - | - - - - -                                                                                                     | -                                     |
| Pt245007gw1.XIV.1750.1                        | - - - - -                                                                                                                                                                                                                                                                     | - - - - - | - - - - -                                                                                                     | -                                     |
| ARF9_AT4G23980                                | <b>M</b> - - - - -                                                                                                                                                                                                                                                            | - - - - - | - - - - -                                                                                                     | 1                                     |
| ARF11_AT2G46530                               | <b>M</b> - - - - -                                                                                                                                                                                                                                                            | - - - - - | - - - - -                                                                                                     | 1                                     |
| ARF18_AT3G61830                               | <b>M</b> - - - - -                                                                                                                                                                                                                                                            | - - - - - | - - - - -                                                                                                     | 1                                     |
| ARF1_AT1G59750                                | <b>M</b> - - - - -                                                                                                                                                                                                                                                            | - - - - - | - - - - -                                                                                                     | 1                                     |
| ZmGRMZM2G017187_P02                           | <b>M</b> - - - - -                                                                                                                                                                                                                                                            | - - - - - | - - - - -                                                                                                     | 1                                     |
| ARF2_AT5G62000                                | <b>M</b> - - - - -                                                                                                                                                                                                                                                            | - - - - - | - - - - -                                                                                                     | 1                                     |
| ZmGRMZM2G006042_P01                           | <b>M</b> - - - - -                                                                                                                                                                                                                                                            | - - - - - | - - - - -                                                                                                     | 1                                     |
| Pt179307_gw1.I.7907.1                         | - - - - -                                                                                                                                                                                                                                                                     | - - - - - | - - - - -                                                                                                     | -                                     |
| ARF21_AT1G34410                               | <b>M</b> <b>E</b> <b>S</b> - - - - -                                                                                                                                                                                                                                          | - - - - - | - - - - -                                                                                                     | 3                                     |
| ARF20_AT1G35240                               | <b>M</b> <b>E</b> <b>T</b> - - - - -                                                                                                                                                                                                                                          | - - - - - | - - - - -                                                                                                     | 3                                     |
| ARF22_AT1G34390                               | <b>M</b> <b>E</b> <b>S</b> - - - - -                                                                                                                                                                                                                                          | - - - - - | - - - - -                                                                                                     | 3                                     |
| ARF12_AT1G34310                               | <b>M</b> <b>E</b> <b>S</b> - - - - -                                                                                                                                                                                                                                          | - - - - - | - - - - -                                                                                                     | 3                                     |
| ARF15_AT1G35520                               | <b>M</b> <b>E</b> <b>T</b> - - - - -                                                                                                                                                                                                                                          | - - - - - | - - - - -                                                                                                     | 3                                     |
| ARF14_AT1G35540                               | <b>M</b> <b>E</b> <b>S</b> - - - - -                                                                                                                                                                                                                                          | - - - - - | - - - - -                                                                                                     | 3                                     |
| ARF13_AT1G34170                               | <b>M</b> <b>E</b> - - - - -                                                                                                                                                                                                                                                   | - - - - - | - - - - -                                                                                                     | 2                                     |
| ARF4_AT5G60450                                | <b>M</b> <b>E</b> <b>F</b> <b>D</b> <b>L</b> <b>N</b> - - - - -                                                                                                                                                                                                               | - - - - - | - - - - -                                                                                                     | 6                                     |
| ARF3_AT2G33860                                | <b>M</b> <b>G</b> <b>G</b> <b>L</b> <b>I</b> <b>D</b> <b>L</b> <b>N</b> <b>V</b> <b>M</b> <b>E</b> <b>T</b> <b>E</b> <b>E</b> <b>D</b> <b>E</b> <b>T</b> <b>Q</b> <b>T</b> <b>Q</b> <b>T</b> <b>P</b> <b>S</b> <b>S</b> <b>A</b> <b>S</b> <b>G</b> <b>S</b> <b>V</b> <b>S</b> | - - - - - | - - - - -                                                                                                     | 30                                    |
| Pt243681_gw1.XIV.424.1                        | - - - - -                                                                                                                                                                                                                                                                     | - - - - - | - - - - -                                                                                                     | -                                     |
| Selmo1_2_61688                                | - - - - -                                                                                                                                                                                                                                                                     | - - - - - | - - - - -                                                                                                     | <b>K</b> 1                            |
| Selmo1_2_51695                                | - - - - -                                                                                                                                                                                                                                                                     | - - - - - | - - - - -                                                                                                     | <b>G</b> <b>G</b> <b>E</b> <b>E</b> 4 |
| Phypha_108888                                 | <b>M</b> - - - - -                                                                                                                                                                                                                                                            | - - - - - | - <b>A</b> <b>S</b> <b>G</b> <b>V</b> - - - <b>G</b> <b>E</b> <b>S</b> <b>V</b>                               | 9                                     |
| ARF10_AT2G28350                               | <b>M</b> - - - - -                                                                                                                                                                                                                                                            | - - - - - | - <b>E</b> <b>Q</b> - - - - <b>E</b>                                                                          | 4                                     |
| ARF16_AT4G30080                               | <b>M</b> - - - - -                                                                                                                                                                                                                                                            | - - - - - | - <b>L</b> <b>N</b> <b>V</b> <b>M</b> <b>N</b> <b>P</b> <b>M</b> <b>K</b> <b>G</b> <b>G</b> <b>T</b> <b>E</b> | 13                                    |
| Phypha_61245                                  | <b>M</b> - - - - -                                                                                                                                                                                                                                                            | - - - - - | - <b>Q</b> <b>G</b> <b>A</b> <b>R</b> <b>H</b> <b>D</b> <b>R</b> <b>F</b> <b>N</b> <b>G</b> - <b>P</b>        | 12                                    |
| ZmGRMZM2G005284_P01                           | <b>M</b> <b>S</b> <b>P</b> <b>E</b> <b>A</b> <b>C</b> <b>E</b> <b>L</b> <b>T</b> <b>A</b> <b>P</b> <b>R</b> <b>M</b> <b>P</b> <b>A</b> <b>S</b> <b>Q</b> <b>A</b> <b>G</b> <b>A</b> <b>G</b> <b>A</b> <b>G</b> <b>A</b> <b>E</b> <b>P</b> <b>E</b> <b>T</b> <b>K</b>          | - - - - - | - - - - -                                                                                                     | 30                                    |
| ARF17_AT1G77850                               | <b>M</b> <b>S</b> <b>P</b> <b>P</b> <b>S</b> <b>A</b> <b>T</b> <b>A</b> <b>G</b> <b>D</b> <b>I</b> - - - - -                                                                                                                                                                  | - - - - - | - - - - -                                                                                                     | 13                                    |
| Phypha_170581                                 | <b>M</b> - - - - -                                                                                                                                                                                                                                                            | - - - - - | - - - - -                                                                                                     | 1                                     |
| all_Phypha_171888                             | <b>M</b> - - - - -                                                                                                                                                                                                                                                            | - - - - - | - - - - -                                                                                                     | 1                                     |
| Selmo1_2_405821                               | <b>M</b> - - - - -                                                                                                                                                                                                                                                            | - - - - - | - - - - -                                                                                                     | 1                                     |
| Selmo1_2_431298                               | <b>M</b> - - - - -                                                                                                                                                                                                                                                            | - - - - - | - - - - -                                                                                                     | 1                                     |
| Selmo1_2_431277                               | <b>M</b> - - - - -                                                                                                                                                                                                                                                            | - - - - - | - - - - -                                                                                                     | 1                                     |
| corb_UMD_Coleochaete_c9703_c_s_1              | <b>M</b> - - - - -                                                                                                                                                                                                                                                            | - - - - - | - - - - -                                                                                                     | 1                                     |
| spra_Contig219_1                              | - - - - -                                                                                                                                                                                                                                                                     | - - - - - | - - - - -                                                                                                     | -                                     |
| IAA12_AT1G04550                               | <b>M</b> <b>R</b> <b>G</b> <b>V</b> <b>S</b> <b>E</b> <b>L</b> <b>E</b> <b>V</b> <b>G</b> <b>K</b> <b>S</b> <b>N</b> <b>L</b> <b>P</b> <b>A</b> <b>E</b> <b>S</b> <b>E</b> <b>E</b> <b>L</b> <b>G</b> <b>L</b> <b>E</b> <b>S</b> - - - - -                                    | - - - - - | - - - - -                                                                                                     | 27                                    |
| Consensus                                     | <b>M</b> - - - - -                                                                                                                                                                                                                                                            | - - - - - | - - - - -                                                                                                     | -                                     |

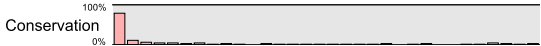

|                                              | 40                                                                                  | 60                |                   |    |
|----------------------------------------------|-------------------------------------------------------------------------------------|-------------------|-------------------|----|
| Phypa1_1_168019_estExt_fgenes1_pg.C_1630077  | .....                                                                               | .....             | 8                 |    |
| Phypa_218828                                 | .....                                                                               | .....             | 1                 |    |
| Phypa1_1_127416_e_gw1.65.212.1               | .....                                                                               | .....             | 2                 |    |
| Phypa1_1_50215_gw1.6.284.1                   | .....                                                                               | .....             | -                 |    |
| Phypa_167026                                 | <b>ERWILELHVR</b>                                                                   | <b>VSKGFDISMA</b> | <b>SASYSGRFDL</b> | 60 |
| Phypa1_1_136986_e_gw1.133.91.1               | .....                                                                               | .....             | -                 |    |
| Phypa_188433                                 | .....                                                                               | .....             | 2                 |    |
| Phypa_165321                                 | .....                                                                               | .....             | 2                 |    |
| ARF8_AT5G37020                               | .....                                                                               | .....             | 12                |    |
| Pt198791_gw1.IV.3880.1                       | .....                                                                               | .....             | 2                 |    |
| ARF6_AT1G30330                               | .....                                                                               | .....             | 12                |    |
| Pt205407_gw1.V.808.1                         | .....                                                                               | .....             | -                 |    |
| Selmo1_117217_e_gw1.55.235.1                 | .....                                                                               | .....             | 17                |    |
| Selmo1_422125                                | .....                                                                               | .....             | 1                 |    |
| Selmo1_424114_fgenes2_pg.C_scaffold_65000063 | .....                                                                               | .....             | 7                 |    |
| Selmo1_446535                                | .....                                                                               | .....             | 7                 |    |
| Selmo1_181406_estExt_Genewise1Plus.C_650169  | .....                                                                               | .....             | 6                 |    |
| ARF19_AT1G19220                              | .....                                                                               | .....             | 3                 |    |
| ARF7_AT5G20730                               | .....                                                                               | .....             | 3                 |    |
| ZmGRMZM2G014864_P01                          | .....                                                                               | .....             | 1                 |    |
| ARF5_AT1G19850                               | <b>STLLEEMKLL</b>                                                                   | <b>KDQSGTR</b>    | 47                |    |
| Selmo1_437944_estExt_fgenes2_pg.C_10526      | .....                                                                               | .....             | 22                |    |
| all_Phypa_77324                              | .....                                                                               | .....             | 1                 |    |
| all_Phypa_159688                             | .....                                                                               | .....             | 1                 |    |
| all_Phypa_225990                             | .....                                                                               | .....             | 1                 |    |
| all_Phypa_171197                             | .....                                                                               | .....             | 1                 |    |
| Pt179921_gw1.I.8521.1                        | .....                                                                               | .....             | -                 |    |
| Pt245007gw1.XIV.1750.1                       | .....                                                                               | .....             | -                 |    |
| ARF9_AT4G23980                               | .....                                                                               | .....             | 1                 |    |
| ARF11_AT2G46530                              | .....                                                                               | .....             | 1                 |    |
| ARF18_AT3G61830                              | .....                                                                               | .....             | 1                 |    |
| ARF1_AT1G59750                               | .....                                                                               | .....             | 1                 |    |
| ZmGRMZM2G017187_P02                          | .....                                                                               | .....             | 1                 |    |
| ARF2_AT5G62000                               | .....                                                                               | .....             | 1                 |    |
| ZmGRMZM2G006042_P01                          | .....                                                                               | .....             | 1                 |    |
| Pt179307_gw1.I.7907.1                        | .....                                                                               | .....             | -                 |    |
| ARF21_AT1G34410                              | .....                                                                               | .....             | 3                 |    |
| ARF20_AT1G35240                              | .....                                                                               | .....             | 3                 |    |
| ARF22_AT1G34390                              | .....                                                                               | .....             | 3                 |    |
| ARF12_AT1G34310                              | .....                                                                               | .....             | 3                 |    |
| ARF15_AT1G35520                              | .....                                                                               | .....             | 3                 |    |
| ARF14_AT1G35540                              | .....                                                                               | .....             | 3                 |    |
| ARF13_AT1G34170                              | .....                                                                               | .....             | 2                 |    |
| ARF4_AT5G60450                               | .....                                                                               | .....             | 6                 |    |
| ARF3_AT2G33860                               | <b>PTSSSSASVS</b>                                                                   | <b>VVSSNSAGGG</b> | 50                |    |
| Pt243681_gw1.XIV.424.1                       | .....                                                                               | .....             | -                 |    |
| Selmo1_2_61688                               | <b>KG</b>                                                                           | .....             | 3                 |    |
| Selmo1_2_51695                               | <b>KH</b>                                                                           | .....             | 6                 |    |
| Phypa_108888                                 | <b>DR</b>                                                                           | .....             | 11                |    |
| ARF10_AT2G28350                              | <b>KS</b>                                                                           | .....             | 6                 |    |
| ARF16_AT4G30080                              | <b>KG</b>                                                                           | .....             | 15                |    |
| Phypa_61245                                  | <b>PS</b>                                                                           | .....             | 14                |    |
| ZmGRMZM2G005284_P01                          | <b>GS</b>                                                                           | .....             | 32                |    |
| ARF17_AT1G77850                              | <b>RE</b>                                                                           | .....             | 15                |    |
| Phypa_170581                                 | .....                                                                               | .....             | 1                 |    |
| all_Phypa_171888                             | .....                                                                               | .....             | 1                 |    |
| Selmo1_2_405821                              | .....                                                                               | .....             | 1                 |    |
| Selmo1_2_431298                              | .....                                                                               | .....             | 1                 |    |
| Selmo1_2_431277                              | .....                                                                               | .....             | 1                 |    |
| corb_UMD_Coleochaete_c9703_c_s_1             | .....                                                                               | .....             | 1                 |    |
| spra_Contig219_1                             | .....                                                                               | .....             | -                 |    |
| IAA12_AT1G04550                              | .....                                                                               | .....             | 27                |    |
| Consensus                                    | .....                                                                               | .....             |                   |    |
| Conservation                                 |  |                   |                   |    |

|                                              | 80                                                          |    |
|----------------------------------------------|-------------------------------------------------------------|----|
| Phypa1_1_168019_estExt_fgenes1_pg.C_1630077  | -----D N F Y V K E G W T V I                                | 20 |
| Phypa_218828                                 | -----                                                       | 1  |
| Phypa1_1_127416_e_gw1.65.212.1               | -----                                                       | 2  |
| Phypa1_1_50215_gw1.6.284.1                   | -----                                                       | -  |
| Phypa_167026                                 | R D L W L G R V R V Y E G A D L E E S D R I V A T K L Q L L | 90 |
| Phypa1_1_136986_e_gw1.133.91.1               | -----                                                       | -  |
| Phypa_188433                                 | -----                                                       | 2  |
| Phypa_165321                                 | -----                                                       | 2  |
| ARF8_AT5G37020                               | -----                                                       | 12 |
| Pt198791_gw1.IV.3880.1                       | -----                                                       | 2  |
| ARF6_AT1G30330                               | -----                                                       | 12 |
| Pt205407_gw1.V.808.1                         | -----                                                       | -  |
| Selmo1_117217_e_gw1.55.235.1                 | -----                                                       | 17 |
| Selmo1_422125                                | -----                                                       | 1  |
| Selmo1_424114_fgenes2_pg.C_scaffold_65000063 | -----                                                       | 7  |
| Selmo1_446535                                | -----                                                       | 7  |
| Selmo1_181406_estExt_Genewise1Plus.C_650169  | -----                                                       | 6  |
| ARF19_AT1G19220                              | -----                                                       | 3  |
| ARF7_AT5G20730                               | -----                                                       | 3  |
| ZmGRMZM2G014864_P01                          | -----                                                       | 1  |
| ARF5_AT1G19850                               | -----                                                       | 47 |
| Selmo1_437944_estExt_fgenes2_pg.C_10526      | -----                                                       | 22 |
| all_Phypa_77324                              | -----                                                       | 1  |
| all_Phypa_159688                             | -----                                                       | 1  |
| all_Phypa_225990                             | -----                                                       | 1  |
| all_Phypa_171197                             | -----                                                       | 1  |
| Pt179921_gw1.I.8521.1                        | -----                                                       | -  |
| Pt245007gw1.XIV.1750.1                       | -----                                                       | -  |
| ARF9_AT4G23980                               | -----                                                       | 1  |
| ARF11_AT2G46530                              | -----                                                       | 1  |
| ARF18_AT3G61830                              | -----                                                       | 1  |
| ARF1_AT1G59750                               | -----                                                       | 1  |
| ZmGRMZM2G017187_P02                          | -----                                                       | 1  |
| ARF2_AT5G62000                               | -----                                                       | 1  |
| ZmGRMZM2G006042_P01                          | -----                                                       | 1  |
| Pt179307_gw1.I.7907.1                        | -----                                                       | -  |
| ARF21_AT1G34410                              | -----                                                       | 3  |
| ARF20_AT1G35240                              | -----                                                       | 3  |
| ARF22_AT1G34390                              | -----                                                       | 3  |
| ARF12_AT1G34310                              | -----                                                       | 3  |
| ARF15_AT1G35520                              | -----                                                       | 3  |
| ARF14_AT1G35540                              | -----                                                       | 3  |
| ARF13_AT1G34170                              | -----                                                       | 2  |
| ARF4_AT5G60450                               | -----                                                       | 6  |
| ARF3_AT2G33860                               | -----                                                       | 50 |
| Pt243681_gw1.XIV.424.1                       | -----                                                       | -  |
| Selmo1_2_61688                               | -----                                                       | 3  |
| Selmo1_2_51695                               | -----                                                       | 6  |
| Phypa_108888                                 | -----                                                       | 11 |
| ARF10_AT2G28350                              | -----                                                       | 6  |
| ARF16_AT4G30080                              | -----                                                       | 15 |
| Phypa_61245                                  | -----                                                       | 14 |
| ZmGRMZM2G005284_P01                          | -----                                                       | 32 |
| ARF17_AT1G77850                              | -----                                                       | 15 |
| Phypa_170581                                 | -----                                                       | 1  |
| all_Phypa_171888                             | -----                                                       | 1  |
| Selmo1_2_405821                              | -----                                                       | 1  |
| Selmo1_2_431298                              | -----                                                       | 1  |
| Selmo1_2_431277                              | -----                                                       | 1  |
| corb_UMD_Coleochaete_c9703_c_s_1             | -----                                                       | 1  |
| spra_Contig219_1                             | -----                                                       | -  |
| IAA12_AT1G04550                              | -----                                                       | 27 |
| Consensus                                    | -----                                                       |    |
| Conservation                                 | -----                                                       |    |

|                                              | 100        | 120        |            |
|----------------------------------------------|------------|------------|------------|
| Phypa1_1_168019_estExt_fgenes1_pg.C_1630077  | RGQSFVVFIP | FSSLAQQESP | GSAWTVWLKL |
| Phypa_218828                                 | .....      | .....      | .....      |
| Phypa1_1_127416_e_gw1.65.212.1               | .....      | .....      | .....      |
| Phypa1_1_50215_gw1.6.284.1                   | .....      | .....      | .....      |
| Phypa_167026                                 | PAMSIAWPVT | LGRKRDGALN | EALVDMVLVS |
| Phypa1_1_136986_e_gw1.133.91.1               | .....      | .....      | .....      |
| Phypa_188433                                 | .....      | .....      | SIFDVPSFC  |
| Phypa_165321                                 | .....      | .....      | S          |
| ARF8_AT5G37020                               | .....      | .....      | .....      |
| Pt198791_gw1.IV.3880.1                       | .....      | .....      | .....      |
| ARF6_AT1G30330                               | .....      | .....      | .....      |
| Pt205407_gw1.V.808.1                         | .....      | .....      | .....      |
| Selmo1_117217_e_gw1.55.235.1                 | .....      | .....      | .....      |
| Selmo1_422125                                | .....      | .....      | .....      |
| Selmo1_424114_fgenes2_pg.C_scaffold_65000063 | .....      | .....      | .....      |
| Selmo1_446535                                | .....      | .....      | .....      |
| Selmo1_181406_estExt_Genewise1Plus.C_650169  | .....      | .....      | .....      |
| ARF19_AT1G19220                              | .....      | .....      | .....      |
| ARF7_AT5G20730                               | .....      | .....      | .....      |
| ZmGRMZM2G014864_P01                          | .....      | .....      | .....      |
| ARF5_AT1G19850                               | .....      | .....      | .....      |
| Selmo1_437944_estExt_fgenes2_pg.C_10526      | .....      | .....      | .....      |
| all_Phypa_77324                              | .....      | .....      | .....      |
| all_Phypa_159688                             | .....      | .....      | .....      |
| all_Phypa_225990                             | .....      | .....      | .....      |
| all_Phypa_171197                             | .....      | .....      | .....      |
| Pt179921_gw1.I.8521.1                        | .....      | .....      | .....      |
| Pt245007gw1.XIV.1750.1                       | .....      | .....      | .....      |
| ARF9_AT4G23980                               | .....      | .....      | .....      |
| ARF11_AT2G46530                              | .....      | .....      | .....      |
| ARF18_AT3G61830                              | .....      | .....      | .....      |
| ARF1_AT1G59750                               | .....      | .....      | .....      |
| ZmGRMZM2G017187_P02                          | .....      | .....      | .....      |
| ARF2_AT5G62000                               | .....      | .....      | .....      |
| ZmGRMZM2G006042_P01                          | .....      | .....      | .....      |
| Pt179307_gw1.I.7907.1                        | .....      | .....      | .....      |
| ARF21_AT1G34410                              | .....      | .....      | .....      |
| ARF20_AT1G35240                              | .....      | .....      | .....      |
| ARF22_AT1G34390                              | .....      | .....      | .....      |
| ARF12_AT1G34310                              | .....      | .....      | .....      |
| ARF15_AT1G35520                              | .....      | .....      | .....      |
| ARF14_AT1G35540                              | .....      | .....      | .....      |
| ARF13_AT1G34170                              | .....      | .....      | .....      |
| ARF4_AT5G60450                               | .....      | .....      | .....      |
| ARF3_AT2G33860                               | .....      | .....      | .....      |
| Pt243681_gw1.XIV.424.1                       | .....      | .....      | .....      |
| Selmo1_2_61688                               | .....      | .....      | .....      |
| Selmo1_2_51695                               | .....      | .....      | .....      |
| Phypa_108888                                 | .....      | .....      | .....      |
| ARF10_AT2G28350                              | .....      | .....      | .....      |
| ARF16_AT4G30080                              | .....      | .....      | .....      |
| Phypa_61245                                  | .....      | .....      | .....      |
| ZmGRMZM2G005284_P01                          | .....      | .....      | .....      |
| ARF17_AT1G77850                              | .....      | .....      | .....      |
| Phypa_170581                                 | .....      | .....      | .....      |
| all_Phypa_171888                             | .....      | .....      | .....      |
| Selmo1_2_405821                              | .....      | .....      | .....      |
| Selmo1_2_431298                              | .....      | .....      | .....      |
| Selmo1_2_431277                              | .....      | .....      | .....      |
| corb_UMD_Coleochaete_c9703_c_s_1             | .....      | .....      | .....      |
| spra_Contig219_1                             | .....      | .....      | .....      |
| IAA12_AT1G04550                              | .....      | .....      | .....      |
| Consensus                                    | .....      | .....      | .....      |
| Conservation                                 | 100%       | .....      | 0%         |



|                                             |                     |                     |                       |     |
|---------------------------------------------|---------------------|---------------------|-----------------------|-----|
| Phypa1_1_168019_estExt_fgenes1_pg.C_1630077 | I S N M E M E V L L | E V S A L R L Q V E | R R S                 | 73  |
| Phypa_218828                                |                     |                     |                       | 1   |
| Phypa1_1_127416_e_gw1.65.212.1              |                     |                     | V E R R S             | 7   |
| Phypa1_1_50215_gw1.6.284.1                  |                     |                     | R R S                 | 3   |
| Phypa_167026                                | K R R R Q N P A T R | I F S Y A C V P G E | R R S                 | 143 |
| Phypa1_1_136986_e_gw1.133.91.1              |                     |                     | G E R R S             | 5   |
| Phypa_188433                                | L L K L S R R K C A | K I K S L I H P V G | E K R                 | 34  |
| Phypa_165321                                | H A S M R G S G     | Y G P P A M D Q     | G E R R               | 23  |
| ARF8_AT5G37020                              |                     |                     | H E G E K - C         | 18  |
| Pt198791_gw1.IV.3880.1                      |                     |                     | K - C                 | 4   |
| ARF6_AT1G30330                              |                     |                     | H E G E K R V         | 19  |
| Pt205407_gw1.V.808.1                        |                     |                     | D K K C               | 4   |
| Selmo1_117217_e_gw1.55.235.1                |                     |                     | P G V K R G           | 23  |
| Selmo1_422125                               |                     |                     | E G V K R G           | 7   |
| Selmo1_424114_fgenes2_pg.C_scaffold_6500063 |                     |                     | G D K K A             | 12  |
| Selmo1_446535                               |                     |                     | G D K K A             | 12  |
| Selmo1_181406_estExt_Genewise1Plus.C_650169 |                     |                     | G E K K A             | 11  |
| ARF19_AT1G19220                             | P S - N             | G F L P S S N E G E | K K P                 | 19  |
| ARF7_AT5G20730                              | P S S N             | G V S P N P V E G E | R R N                 | 20  |
| ZmGRMZM2G014864_P01                         |                     |                     |                       | 1   |
| ARF5_AT1G19850                              |                     |                     | K P V                 | 50  |
| Selmo1_437944_estExt_fgenes2_pg.C_10526     |                     | P Q P N H G N       | T N A                 | 32  |
| all_Phypa_77324                             |                     |                     | E D D L Q P T L V T N | 12  |
| all_Phypa_159688                            |                     |                     |                       | 1   |
| all_Phypa_225990                            |                     |                     | D E                   | 3   |
| all_Phypa_171197                            |                     |                     | D E                   | 3   |
| Pt179921_gw1.I.8521.1                       |                     |                     |                       | -   |
| Pt245007gw1.XIV.1750.1                      |                     |                     |                       | -   |
| ARF9_AT4G23980                              |                     |                     |                       | 1   |
| ARF11_AT2G46530                             |                     |                     |                       | 1   |
| ARF18_AT3G61830                             |                     |                     |                       | 1   |
| ARF1_AT1G59750                              |                     |                     |                       | 1   |
| ZmGRMZM2G017187_P02                         |                     |                     |                       | 1   |
| ARF2_AT5G62000                              |                     |                     |                       | 1   |
| ZmGRMZM2G006042_P01                         |                     |                     |                       | 1   |
| Pt179307_gw1.I.7907.1                       |                     |                     |                       | -   |
| ARF21_AT1G34410                             |                     |                     |                       | 3   |
| ARF20_AT1G35240                             |                     |                     |                       | 3   |
| ARF22_AT1G34390                             |                     |                     |                       | 3   |
| ARF12_AT1G34310                             |                     |                     |                       | 3   |
| ARF15_AT1G35520                             |                     |                     |                       | 3   |
| ARF14_AT1G35540                             |                     |                     |                       | 3   |
| ARF13_AT1G34170                             |                     |                     |                       | 2   |
| ARF4_AT5G60450                              |                     |                     |                       | 6   |
| ARF3_AT2G33860                              |                     |                     |                       | 50  |
| Pt243681_gw1.XIV.424.1                      |                     |                     |                       | -   |
| Selmo1_2_61688                              |                     |                     |                       | 3   |
| Selmo1_2_51695                              |                     |                     |                       | 6   |
| Phypa_108888                                |                     |                     |                       | 11  |
| ARF10_AT2G28350                             |                     |                     |                       | 6   |
| ARF16_AT4G30080                             |                     |                     |                       | 15  |
| Phypa_61245                                 |                     |                     |                       | 14  |
| ZmGRMZM2G005284_P01                         |                     |                     |                       | 32  |
| ARF17_AT1G77850                             |                     |                     |                       | 15  |
| Phypa_170581                                |                     |                     |                       | 1   |
| all_Phypa_171888                            |                     |                     |                       | 1   |
| Selmo1_2_405821                             |                     |                     |                       | 1   |
| Selmo1_2_431298                             |                     |                     |                       | 1   |
| Selmo1_2_431277                             |                     |                     |                       | 1   |
| corb_UMD_Coleochaete_c9703_c_s_1            |                     |                     |                       | 1   |
| spra_Contig219_1                            |                     |                     |                       | -   |
| IAA12_AT1G04550                             |                     |                     |                       | 27  |

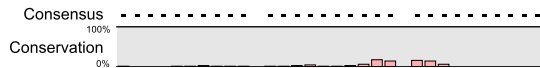

|                                              | 160        | 180        |            |    |
|----------------------------------------------|------------|------------|------------|----|
| Phypa1_1_168019_estExt_fgenes1_pg.C_1630077  | -----      | -----      | 73         |    |
| Phypa_218828                                 | -----      | -----      | 1          |    |
| Phypa1_1_127416_e_gw1.65.212.1               | -----      | -----      | 7          |    |
| Phypa1_1_50215_gw1.6.284.1                   | -----      | -----      | 3          |    |
| Phypa_167026                                 | -----      | -----      | 143        |    |
| Phypa1_1_136986_e_gw1.133.91.1               | -----      | -----      | 5          |    |
| Phypa_188433                                 | -----      | -----      | 34         |    |
| Phypa_165321                                 | -----      | -----      | 23         |    |
| ARF8_AT5G37020                               | -----      | -----      | 18         |    |
| Pt198791_gw1.IV.3880.1                       | -----      | -----      | 4          |    |
| ARF6_AT1G30330                               | -----      | -----      | 19         |    |
| Pt205407_gw1.V.808.1                         | -----      | -----      | 4          |    |
| Selmo1_117217_e_gw1.55.235.1                 | -----      | -----      | 23         |    |
| Selmo1_422125                                | -----      | -----      | 7          |    |
| Selmo1_424114_fgenes2_pg.C_scaffold_65000063 | -----      | -----      | 12         |    |
| Selmo1_446535                                | -----      | -----      | 12         |    |
| Selmo1_181406_estExt_Genewise1Plus.C_650169  | -----      | -----      | 11         |    |
| ARF19_AT1G19220                              | -----      | -----      | 19         |    |
| ARF7_AT5G20730                               | -----      | -----      | 20         |    |
| ZmGRMZM2G014864_P01                          | -----      | -----      | 1          |    |
| ARF5_AT1G19850                               | -----      | -----      | 50         |    |
| Selmo1_437944_estExt_fgenes2_pg.C_10526      | -----      | -----      | 32         |    |
| all_Phypa_77324                              | HGVALNVLRP | PDNHQWSCSG | LLDPAIRQAS | 42 |
| all_Phypa_159688                             | -----      | -----      | -----      | 1  |
| all_Phypa_225990                             | -----      | -----      | -----      | 3  |
| all_Phypa_171197                             | -----      | -----      | -----      | 3  |
| Pt179921_gw1.I.8521.1                        | -----      | -----      | -----      | -  |
| Pt245007gw1.XIV.1750.1                       | -----      | -----      | -----      | -  |
| ARF9_AT4G23980                               | -----      | -----      | -----      | 1  |
| ARF11_AT2G46530                              | -----      | -----      | -----      | 1  |
| ARF18_AT3G61830                              | -----      | -----      | -----      | 1  |
| ARF1_AT1G59750                               | -----      | -----      | -----      | 1  |
| ZmGRMZM2G017187_P02                          | -----      | -----      | -----      | 1  |
| ARF2_AT5G62000                               | -----      | -----      | -----      | 1  |
| ZmGRMZM2G006042_P01                          | -----      | -----      | -----      | 1  |
| Pt179307_gw1.I.7907.1                        | -----      | -----      | -----      | -  |
| ARF21_AT1G34410                              | -----      | -----      | -----      | 3  |
| ARF20_AT1G35240                              | -----      | -----      | -----      | 3  |
| ARF22_AT1G34390                              | -----      | -----      | -----      | 3  |
| ARF12_AT1G34310                              | -----      | -----      | -----      | 3  |
| ARF15_AT1G35520                              | -----      | -----      | -----      | 3  |
| ARF14_AT1G35540                              | -----      | -----      | -----      | 3  |
| ARF13_AT1G34170                              | -----      | -----      | -----      | 2  |
| ARF4_AT5G60450                               | -----      | -----      | -----      | 6  |
| ARF3_AT2G33860                               | -----      | -----      | -----      | 50 |
| Pt243681_gw1.XIV.424.1                       | -----      | -----      | -----      | -  |
| Selmo1_2_61688                               | -----      | -----      | -----      | 3  |
| Selmo1_2_51695                               | -----      | -----      | -----      | 6  |
| Phypa_108888                                 | -----      | -----      | -----      | 11 |
| ARF10_AT2G28350                              | -----      | -----      | -----      | 6  |
| ARF16_AT4G30080                              | -----      | -----      | -----      | 15 |
| Phypa_61245                                  | -----      | -----      | -----      | 14 |
| ZmGRMZM2G005284_P01                          | -----      | -----      | -----      | 32 |
| ARF17_AT1G77850                              | -----      | -----      | -----      | 15 |
| Phypa_170581                                 | -----      | -----      | -----      | 1  |
| all_Phypa_171888                             | -----      | -----      | -----      | 1  |
| Selmo1_2_405821                              | -----      | -----      | -----      | 1  |
| Selmo1_2_431298                              | -----      | -----      | -----      | 1  |
| Selmo1_2_431277                              | -----      | -----      | -----      | 1  |
| corb_UMD_Coleochaete_c9703_c_s_1             | -----      | -----      | -----      | 1  |
| spra_Contig219_1                             | -----      | -----      | -----      | -  |
| IAA12_AT1G04550                              | -----      | -----      | -----      | 27 |
| Consensus                                    | -----      | -----      | -----      |    |
| Conservation                                 | -----      | -----      | -----      |    |

|                                               |       |       |       |       |       |       |       |       |       |       |       |       |
|-----------------------------------------------|-------|-------|-------|-------|-------|-------|-------|-------|-------|-------|-------|-------|
| Phypa1_1_168019_estExt_fgenesh1_pg.C_1630077  | ----- | ----- | ----- | 73    |       |       |       |       |       |       |       |       |
| Phypa_218828                                  | ----- | ----- | ----- | 1     |       |       |       |       |       |       |       |       |
| Phypa1_1_127416_e_gw1.65.212.1                | ----- | ----- | ----- | 7     |       |       |       |       |       |       |       |       |
| Phypa1_1_50215_gw1.6.284.1                    | ----- | ----- | ----- | 3     |       |       |       |       |       |       |       |       |
| Phypa_167026                                  | ----- | ----- | ----- | 143   |       |       |       |       |       |       |       |       |
| Phypa1_1_136986_e_gw1.133.91.1                | ----- | ----- | ----- | 5     |       |       |       |       |       |       |       |       |
| Phypa_188433                                  | ----- | ----- | ----- | 34    |       |       |       |       |       |       |       |       |
| Phypa_165321                                  | ----- | ----- | ----- | 23    |       |       |       |       |       |       |       |       |
| ARF8_AT5G37020                                | ----- | ----- | ----- | 18    |       |       |       |       |       |       |       |       |
| Pt198791_gw1.IV.3880.1                        | ----- | ----- | ----- | 4     |       |       |       |       |       |       |       |       |
| ARF6_AT1G30330                                | ----- | ----- | ----- | 19    |       |       |       |       |       |       |       |       |
| Pt205407_gw1.V.808.1                          | ----- | ----- | ----- | 4     |       |       |       |       |       |       |       |       |
| Selmo1_117217_e_gw1.55.235.1                  | ----- | ----- | ----- | 23    |       |       |       |       |       |       |       |       |
| Selmo1_422125                                 | ----- | ----- | ----- | 7     |       |       |       |       |       |       |       |       |
| Selmo1_424114_fgenesh2_pg.C_scaffold_65000063 | ----- | ----- | ----- | 12    |       |       |       |       |       |       |       |       |
| Selmo1_446535                                 | ----- | ----- | ----- | 12    |       |       |       |       |       |       |       |       |
| Selmo1_181406_estExt_Genewise1Plus.C_650169   | ----- | ----- | ----- | 11    |       |       |       |       |       |       |       |       |
| ARF19_AT1G19220                               | ----- | ----- | ----- | 19    |       |       |       |       |       |       |       |       |
| ARF7_AT5G20730                                | ----- | ----- | ----- | 20    |       |       |       |       |       |       |       |       |
| ZmGRMZM2G014864_P01                           | ----- | ----- | ----- | 1     |       |       |       |       |       |       |       |       |
| ARF5_AT1G19850                                | ----- | ----- | ----- | 50    |       |       |       |       |       |       |       |       |
| Selmo1_437944_estExt_fgenesh2_pg.C_10526      | ----- | ----- | ----- | 32    |       |       |       |       |       |       |       |       |
| all_Phypa_77324                               | RGR   | LFWL  | DL    | GV    | CCVQ  | EC    | L     | VCG   | VYV   | GV    | G     | 72    |
| all_Phypa_159688                              | ----- | ----- | ----- | ----- | ----- | ----- | ----- | ----- | ----- | ----- | ----- | 1     |
| all_Phypa_225990                              | ----- | ----- | ----- | ----- | ----- | ----- | ----- | ----- | ----- | ----- | ----- | 3     |
| all_Phypa_171197                              | ----- | ----- | ----- | ----- | ----- | ----- | ----- | ----- | ----- | ----- | ----- | 3     |
| Pt179921_gw1.I.8521.1                         | ----- | ----- | ----- | ----- | ----- | ----- | ----- | ----- | ----- | ----- | ----- | -     |
| Pt245007gw1.XIV.1750.1                        | ----- | ----- | ----- | ----- | ----- | ----- | ----- | ----- | ----- | ----- | ----- | -     |
| ARF9_AT4G23980                                | ----- | ----- | ----- | ----- | ----- | ----- | ----- | ----- | ----- | ----- | ----- | 1     |
| ARF11_AT2G46530                               | ----- | ----- | ----- | ----- | ----- | ----- | ----- | ----- | ----- | ----- | ----- | 1     |
| ARF18_AT3G61830                               | ----- | ----- | ----- | ----- | ----- | ----- | ----- | ----- | ----- | ----- | ----- | 1     |
| ARF1_AT1G59750                                | ----- | ----- | ----- | ----- | ----- | ----- | ----- | ----- | ----- | ----- | ----- | 1     |
| ZmGRMZM2G017187_P02                           | ----- | ----- | ----- | ----- | ----- | ----- | ----- | ----- | ----- | ----- | ----- | 1     |
| ARF2_AT5G62000                                | ----- | ----- | ----- | ----- | ----- | ----- | ----- | ----- | ----- | ----- | ----- | 1     |
| ZmGRMZM2G006042_P01                           | ----- | ----- | ----- | ----- | ----- | ----- | ----- | ----- | ----- | ----- | ----- | 1     |
| Pt179307_gw1.I.7907.1                         | ----- | ----- | ----- | ----- | ----- | ----- | ----- | ----- | ----- | ----- | ----- | -     |
| ARF21_AT1G34410                               | ----- | ----- | ----- | ----- | ----- | ----- | ----- | ----- | ----- | ----- | ----- | 3     |
| ARF20_AT1G35240                               | ----- | ----- | ----- | ----- | ----- | ----- | ----- | ----- | ----- | ----- | ----- | 3     |
| ARF22_AT1G34390                               | ----- | ----- | ----- | ----- | ----- | ----- | ----- | ----- | ----- | ----- | ----- | 3     |
| ARF12_AT1G34310                               | ----- | ----- | ----- | ----- | ----- | ----- | ----- | ----- | ----- | ----- | ----- | 3     |
| ARF15_AT1G35520                               | ----- | ----- | ----- | ----- | ----- | ----- | ----- | ----- | ----- | ----- | ----- | 3     |
| ARF14_AT1G35540                               | ----- | ----- | ----- | ----- | ----- | ----- | ----- | ----- | ----- | ----- | ----- | 3     |
| ARF13_AT1G34170                               | ----- | ----- | ----- | ----- | ----- | ----- | ----- | ----- | ----- | ----- | ----- | 2     |
| ARF4_AT5G60450                                | ----- | ----- | ----- | ----- | ----- | ----- | ----- | ----- | ----- | ----- | ----- | 6     |
| ARF3_AT2G33860                                | ----- | ----- | ----- | ----- | ----- | ----- | ----- | ----- | ----- | ----- | ----- | 50    |
| Pt243681_gw1.XIV.424.1                        | ----- | ----- | ----- | ----- | ----- | ----- | ----- | ----- | ----- | ----- | ----- | -     |
| Selmo1_2_61688                                | ----- | ----- | ----- | ----- | ----- | ----- | ----- | ----- | ----- | ----- | ----- | 3     |
| Selmo1_2_51695                                | ----- | ----- | ----- | ----- | ----- | ----- | ----- | ----- | ----- | ----- | ----- | 6     |
| Phypa_108888                                  | ----- | ----- | ----- | ----- | ----- | ----- | ----- | ----- | ----- | ----- | ----- | 11    |
| ARF10_AT2G28350                               | ----- | ----- | ----- | ----- | ----- | ----- | ----- | ----- | ----- | ----- | ----- | 6     |
| ARF16_AT4G30080                               | ----- | ----- | ----- | ----- | ----- | ----- | ----- | ----- | ----- | ----- | ----- | 15    |
| Phypa_61245                                   | ----- | ----- | ----- | ----- | ----- | ----- | ----- | ----- | ----- | ----- | ----- | 14    |
| ZmGRMZM2G005284_P01                           | ----- | ----- | ----- | ----- | ----- | ----- | ----- | ----- | ----- | ----- | ----- | 32    |
| ARF17_AT1G77850                               | ----- | ----- | ----- | ----- | ----- | ----- | ----- | ----- | ----- | ----- | ----- | 15    |
| Phypa_170581                                  | ----- | ----- | ----- | ----- | ----- | ----- | ----- | ----- | ----- | ----- | ----- | 1     |
| all_Phypa_171888                              | ----- | ----- | ----- | ----- | ----- | ----- | ----- | ----- | ----- | ----- | ----- | 1     |
| Selmo1_2_405821                               | ----- | ----- | ----- | ----- | ----- | ----- | ----- | ----- | ----- | ----- | ----- | 1     |
| Selmo1_2_431298                               | ----- | ----- | ----- | ----- | ----- | ----- | ----- | ----- | ----- | ----- | ----- | 1     |
| Selmo1_2_431277                               | ----- | ----- | ----- | ----- | ----- | ----- | ----- | ----- | ----- | ----- | ----- | 1     |
| corb_UMD_Coleochaete_c9703_c_s_1              | ----- | ----- | ----- | ----- | ----- | ----- | ----- | ----- | ----- | ----- | ----- | 1     |
| spra_Contig219_1                              | ----- | ----- | ----- | ----- | ----- | ----- | ----- | ----- | ----- | ----- | ----- | -     |
| IAA12_AT1G04550                               | ----- | ----- | ----- | ----- | ----- | ----- | ----- | ----- | ----- | ----- | ----- | 27    |
| Consensus                                     | ----- | ----- | ----- | ----- | ----- | ----- | ----- | ----- | ----- | ----- | ----- | ----- |
| Conservation                                  |       |       |       |       |       |       |       |       |       |       |       |       |

|                                              | 220       | 240        |            |     |
|----------------------------------------------|-----------|------------|------------|-----|
| Phypa1_1_168019_estExt_fgenes1_pg.C_1630077  | .....     | .....      | 73         |     |
| Phypa_218828                                 | .....     | .....      | 1          |     |
| Phypa1_1_127416_e_gw1.65.212.1               | .....     | .....      | 7          |     |
| Phypa1_1_50215_gw1.6.284.1                   | .....     | .....      | 3          |     |
| Phypa_167026                                 | .....     | .....      | 143        |     |
| Phypa1_1_136986_e_gw1.133.91.1               | .....     | .....      | 5          |     |
| Phypa_188433                                 | .....     | .....      | 34         |     |
| Phypa_165321                                 | .....     | .....      | 23         |     |
| ARF8_AT5G37020                               | .....     | .....      | 18         |     |
| Pt198791_gw1.IV.3880.1                       | .....     | .....      | 4          |     |
| ARF6_AT1G30330                               | .....     | .....      | 19         |     |
| Pt205407_gw1.V.808.1                         | .....     | .....      | 4          |     |
| Selmo1_117217_e_gw1.55.235.1                 | .....     | .....      | 23         |     |
| Selmo1_422125                                | .....     | .....      | 7          |     |
| Selmo1_424114_fgenes2_pg.C_scaffold_65000063 | .....     | .....      | 12         |     |
| Selmo1_446535                                | .....     | .....      | 12         |     |
| Selmo1_181406_estExt_Genewise1Plus.C_650169  | .....     | .....      | 11         |     |
| ARF19_AT1G19220                              | .....     | .....      | 19         |     |
| ARF7_AT5G20730                               | .....     | .....      | 20         |     |
| ZmGRMZM2G014864_P01                          | .....     | .....      | 1          |     |
| ARF5_AT1G19850                               | .....     | .....      | 50         |     |
| Selmo1_437944_estExt_fgenes2_pg.C_10526      | .....     | .....      | 32         |     |
| all_Phypa_77324                              | SARGCSDMN | FKLVKEEAY  | ID-IEIQVKS | 101 |
| all_Phypa_159688                             | N         | FKLVKEEAYG | KD-IEIQVTS | 21  |
| all_Phypa_225990                             | .....     | .....      | .....      | 3   |
| all_Phypa_171197                             | REIRENG   | SKTLKMGRCG | LPGRRSRHHK | 30  |
| Pt179921_gw1.I.8521.1                        | .....     | .....      | .....      | -   |
| Pt245007gw1.XIV.1750.1                       | .....     | .....      | .....      | -   |
| ARF9_AT4G23980                               | .....     | .....      | .....      | 1   |
| ARF11_AT2G46530                              | .....     | .....      | .....      | 1   |
| ARF18_AT3G61830                              | .....     | .....      | .....      | 1   |
| ARF1_AT1G59750                               | .....     | .....      | .....      | 1   |
| ZmGRMZM2G017187_P02                          | .....     | .....      | .....      | 1   |
| ARF2_AT5G62000                               | .....     | .....      | .....      | 1   |
| ZmGRMZM2G006042_P01                          | .....     | .....      | .....      | 1   |
| Pt179307_gw1.I.7907.1                        | .....     | .....      | .....      | -   |
| ARF21_AT1G34410                              | .....     | .....      | .....      | 3   |
| ARF20_AT1G35240                              | .....     | .....      | .....      | 3   |
| ARF22_AT1G34390                              | .....     | .....      | .....      | 3   |
| ARF12_AT1G34310                              | .....     | .....      | .....      | 3   |
| ARF15_AT1G35520                              | .....     | .....      | .....      | 3   |
| ARF14_AT1G35540                              | .....     | .....      | .....      | 3   |
| ARF13_AT1G34170                              | .....     | .....      | .....      | 2   |
| ARF4_AT5G60450                               | .....     | .....      | .....      | 6   |
| ARF3_AT2G33860                               | .....     | .....      | .....      | 50  |
| Pt243681_gw1.XIV.424.1                       | .....     | .....      | .....      | -   |
| Selmo1_2_61688                               | .....     | .....      | .....      | 3   |
| Selmo1_2_51695                               | .....     | .....      | .....      | 6   |
| Phypa_108888                                 | .....     | .....      | .....      | 11  |
| ARF10_AT2G28350                              | .....     | .....      | .....      | 6   |
| ARF16_AT4G30080                              | .....     | .....      | .....      | 15  |
| Phypa_61245                                  | .....     | .....      | .....      | 14  |
| ZmGRMZM2G005284_P01                          | .....     | .....      | .....      | 32  |
| ARF17_AT1G77850                              | .....     | .....      | .....      | 15  |
| Phypa_170581                                 | .....     | .....      | .....      | 1   |
| all_Phypa_171888                             | .....     | .....      | .....      | 1   |
| Selmo1_2_405821                              | .....     | .....      | .....      | 1   |
| Selmo1_2_431298                              | .....     | .....      | .....      | 1   |
| Selmo1_2_431277                              | .....     | .....      | .....      | 1   |
| corb_UMD_Coleochaete_c9703_c_s_1             | .....     | .....      | .....      | 1   |
| spra_Contig219_1                             | .....     | .....      | .....      | -   |
| IAA12_AT1G04550                              | .....     | .....      | .....      | 27  |
| Consensus                                    | .....     | .....      | .....      |     |
| Conservation                                 | .....     | .....      | .....      |     |

|                                              |                              |                                                |                                              |     |
|----------------------------------------------|------------------------------|------------------------------------------------|----------------------------------------------|-----|
| Phypa1_1_168019_estExt_fgenes1_pg.C_1630077  | -----                        | -----                                          | -----                                        | 73  |
| Phypa_218828                                 | -----                        | -----                                          | -----                                        | 1   |
| Phypa1_1_127416_e_gw1.65.212.1               | -----                        | -----                                          | -----                                        | 7   |
| Phypa1_1_50215_gw1.6.284.1                   | -----                        | -----                                          | -----                                        | 3   |
| Phypa_167026                                 | -----                        | -----                                          | -----                                        | 143 |
| Phypa1_1_136986_e_gw1.133.91.1               | -----                        | -----                                          | -----                                        | 5   |
| Phypa_188433                                 | -----                        | -----                                          | -----                                        | 34  |
| Phypa_165321                                 | -----                        | -----                                          | -----                                        | 23  |
| ARF8_AT5G37020                               | -----                        | -----                                          | -----                                        | 18  |
| Pt198791_gw1.IV.3880.1                       | -----                        | -----                                          | -----                                        | 4   |
| ARF6_AT1G30330                               | -----                        | -----                                          | -----                                        | 19  |
| Pt205407_gw1.V.808.1                         | -----                        | -----                                          | -----                                        | 4   |
| Selmo1_117217_e_gw1.55.235.1                 | -----                        | -----                                          | -----                                        | 23  |
| Selmo1_422125                                | -----                        | -----                                          | -----                                        | 7   |
| Selmo1_424114_fgenes2_pg.C_scaffold_65000063 | -----                        | -----                                          | -----                                        | 12  |
| Selmo1_446535                                | -----                        | -----                                          | -----                                        | 12  |
| Selmo1_181406_estExt_Genewise1Plus.C_650169  | -----                        | -----                                          | -----                                        | 11  |
| ARF19_AT1G19220                              | -----                        | -----                                          | -----                                        | 19  |
| ARF7_AT5G20730                               | -----                        | -----                                          | -----                                        | 20  |
| ZmGRMZM2G014864_P01                          | -----                        | -----                                          | -----                                        | 1   |
| ARF5_AT1G19850                               | -----                        | -----                                          | -----                                        | 50  |
| Selmo1_437944_estExt_fgenes2_pg.C_10526      | -----                        | -----                                          | -----                                        | 32  |
| all_Phypa_77324                              | QVGS <b>C</b> DGRGM          | KWAM <b>L</b> QRRIT                            | V <b>N</b> DAARDV <b>A</b> E                 | 131 |
| all_Phypa_159688                             | Q- <b>S</b> LRGC             | K- <b>L</b>                                    | -E <b>A</b> C <b>P</b> S <b>F</b> V <b>E</b> | 36  |
| all_Phypa_225990                             | -----                        | -----                                          | -----                                        | 3   |
| all_Phypa_171197                             | E <b>A</b> ATTT <b>T</b> TRG | T <b>M</b> AS <b>F</b> S <b>P</b> P <b>Y</b> A | S <b>P</b> SSSS <b>S</b> A <b>S</b> A        | 60  |
| Pt179921_gw1.I.8521.1                        | -----                        | -----                                          | -----                                        | -   |
| Pt245007gw1.XIV.1750.1                       | -----                        | -----                                          | -----                                        | -   |
| ARF9_AT4G23980                               | -----                        | -----                                          | -----                                        | 1   |
| ARF11_AT2G46530                              | -----                        | -----                                          | -----                                        | 1   |
| ARF18_AT3G61830                              | -----                        | -----                                          | -----                                        | 1   |
| ARF1_AT1G59750                               | -----                        | -----                                          | -----                                        | 1   |
| ZmGRMZM2G017187_P02                          | -----                        | -----                                          | -----                                        | 1   |
| ARF2_AT5G62000                               | -----                        | -----                                          | -----                                        | 1   |
| ZmGRMZM2G006042_P01                          | -----                        | -----                                          | -----                                        | 1   |
| Pt179307_gw1.I.7907.1                        | -----                        | -----                                          | -----                                        | -   |
| ARF21_AT1G34410                              | -----                        | -----                                          | -----                                        | 3   |
| ARF20_AT1G35240                              | -----                        | -----                                          | -----                                        | 3   |
| ARF22_AT1G34390                              | -----                        | -----                                          | -----                                        | 3   |
| ARF12_AT1G34310                              | -----                        | -----                                          | -----                                        | 3   |
| ARF15_AT1G35520                              | -----                        | -----                                          | -----                                        | 3   |
| ARF14_AT1G35540                              | -----                        | -----                                          | -----                                        | 3   |
| ARF13_AT1G34170                              | -----                        | -----                                          | -----                                        | 2   |
| ARF4_AT5G60450                               | -----                        | -----                                          | -----                                        | 6   |
| ARF3_AT2G33860                               | -----                        | -----                                          | -----                                        | 50  |
| Pt243681_gw1.XIV.424.1                       | -----                        | -----                                          | -----                                        | -   |
| Selmo1_2_61688                               | -----                        | -----                                          | -----                                        | 3   |
| Selmo1_2_51695                               | -----                        | -----                                          | -----                                        | 6   |
| Phypa_108888                                 | -----                        | -----                                          | -----                                        | 11  |
| ARF10_AT2G28350                              | -----                        | -----                                          | -----                                        | 6   |
| ARF16_AT4G30080                              | -----                        | -----                                          | -----                                        | 15  |
| Phypa_61245                                  | -----                        | -----                                          | -----                                        | 14  |
| ZmGRMZM2G005284_P01                          | -----                        | -----                                          | -----                                        | 32  |
| ARF17_AT1G77850                              | -----                        | -----                                          | -----                                        | 15  |
| Phypa_170581                                 | -----                        | -----                                          | -----                                        | 1   |
| all_Phypa_171888                             | -----                        | -----                                          | -----                                        | 1   |
| Selmo1_2_405821                              | -----                        | -----                                          | -----                                        | 1   |
| Selmo1_2_431298                              | -----                        | -----                                          | -----                                        | 1   |
| Selmo1_2_431277                              | -----                        | -----                                          | -----                                        | 1   |
| corb_UMD_Coleochaete_c9703_c_s_1             | -----                        | -----                                          | -----                                        | 1   |
| spra_Contig219_1                             | -----                        | -----                                          | -----                                        | -   |
| IAA12_AT1G04550                              | -----                        | -----                                          | -----                                        | 27  |

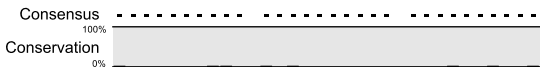

|                                              | 280                                                                                 | 300        |            |     |
|----------------------------------------------|-------------------------------------------------------------------------------------|------------|------------|-----|
| Phypa1_1_168019_estExt_fgenes1_pg.C_1630077  | .....                                                                               | .....      | 73         |     |
| Phypa_218828                                 | .....                                                                               | .....      | 1          |     |
| Phypa1_1_127416_e_gw1.65.212.1               | .....                                                                               | .....      | 7          |     |
| Phypa1_1_50215_gw1.6.284.1                   | .....                                                                               | .....      | 3          |     |
| Phypa_167026                                 | .....                                                                               | .....      | 143        |     |
| Phypa1_1_136986_e_gw1.133.91.1               | .....                                                                               | .....      | 5          |     |
| Phypa_188433                                 | .....                                                                               | .....      | 34         |     |
| Phypa_165321                                 | .....                                                                               | .....      | 23         |     |
| ARF8_AT5G37020                               | .....                                                                               | .....      | 18         |     |
| Pt198791_gw1.IV.3880.1                       | .....                                                                               | .....      | 4          |     |
| ARF6_AT1G30330                               | .....                                                                               | .....      | 19         |     |
| Pt205407_gw1.V.808.1                         | .....                                                                               | .....      | 4          |     |
| Selmo1_117217_e_gw1.55.235.1                 | .....                                                                               | .....      | 23         |     |
| Selmo1_422125                                | .....                                                                               | .....      | 7          |     |
| Selmo1_424114_fgenes2_pg.C_scaffold_65000063 | .....                                                                               | .....      | 12         |     |
| Selmo1_446535                                | .....                                                                               | .....      | 12         |     |
| Selmo1_181406_estExt_Genewise1Plus.C_650169  | .....                                                                               | .....      | 11         |     |
| ARF19_AT1G19220                              | .....                                                                               | .....      | 19         |     |
| ARF7_AT5G20730                               | .....                                                                               | .....      | 20         |     |
| ZmGRMZM2G014864_P01                          | .....                                                                               | .....      | 1          |     |
| ARF5_AT1G19850                               | .....                                                                               | .....      | 50         |     |
| Selmo1_437944_estExt_fgenes2_pg.C_10526      | .....                                                                               | .....      | 32         |     |
| all_Phypa_77324                              | GV-CWWFLEP                                                                          | KIAASLVI   | VHVVH      | 154 |
| all_Phypa_159688                             | FISRWFLLK                                                                           | Q--RLVL    | FFAREW     | 57  |
| all_Phypa_225990                             | .....                                                                               | .....      | .....      | 3   |
| all_Phypa_171197                             | SLISGYFRAS                                                                          | ALRRRLAVWQ | SRLFYLSLPR | 90  |
| Pt179921_gw1.I.8521.1                        | .....                                                                               | .....      | .....      | -   |
| Pt245007gw1.XIV.1750.1                       | .....                                                                               | .....      | .....      | -   |
| ARF9_AT4G23980                               | .....                                                                               | .....      | .....      | 1   |
| ARF11_AT2G46530                              | .....                                                                               | .....      | .....      | 1   |
| ARF18_AT3G61830                              | .....                                                                               | .....      | .....      | 1   |
| ARF1_AT1G59750                               | .....                                                                               | .....      | .....      | 1   |
| ZmGRMZM2G017187_P02                          | .....                                                                               | .....      | .....      | 1   |
| ARF2_AT5G62000                               | .....                                                                               | .....      | .....      | 1   |
| ZmGRMZM2G006042_P01                          | .....                                                                               | .....      | .....      | 1   |
| Pt179307_gw1.I.7907.1                        | .....                                                                               | .....      | .....      | -   |
| ARF21_AT1G34410                              | .....                                                                               | .....      | .....      | 3   |
| ARF20_AT1G35240                              | .....                                                                               | .....      | .....      | 3   |
| ARF22_AT1G34390                              | .....                                                                               | .....      | .....      | 3   |
| ARF12_AT1G34310                              | .....                                                                               | .....      | .....      | 3   |
| ARF15_AT1G35520                              | .....                                                                               | .....      | .....      | 3   |
| ARF14_AT1G35540                              | .....                                                                               | .....      | .....      | 3   |
| ARF13_AT1G34170                              | .....                                                                               | .....      | .....      | 2   |
| ARF4_AT5G60450                               | .....                                                                               | .....      | .....      | 6   |
| ARF3_AT2G33860                               | .....                                                                               | .....      | .....      | 50  |
| Pt243681_gw1.XIV.424.1                       | .....                                                                               | .....      | .....      | -   |
| Selmo1_2_61688                               | .....                                                                               | .....      | .....      | 3   |
| Selmo1_2_51695                               | .....                                                                               | .....      | .....      | 6   |
| Phypa_108888                                 | .....                                                                               | .....      | .....      | 11  |
| ARF10_AT2G28350                              | .....                                                                               | .....      | .....      | 6   |
| ARF16_AT4G30080                              | .....                                                                               | .....      | .....      | 15  |
| Phypa_61245                                  | .....                                                                               | .....      | .....      | 14  |
| ZmGRMZM2G005284_P01                          | .....                                                                               | .....      | .....      | 32  |
| ARF17_AT1G77850                              | .....                                                                               | .....      | .....      | 15  |
| Phypa_170581                                 | .....                                                                               | .....      | .....      | 1   |
| all_Phypa_171888                             | .....                                                                               | .....      | .....      | 1   |
| Selmo1_2_405821                              | .....                                                                               | .....      | .....      | 1   |
| Selmo1_2_431298                              | .....                                                                               | .....      | .....      | 1   |
| Selmo1_2_431277                              | .....                                                                               | .....      | .....      | 1   |
| corb_UMD_Coleochaete_c9703_c_s_1             | .....                                                                               | .....      | .....      | 1   |
| spra_Contig219_1                             | .....                                                                               | .....      | .....      | -   |
| IAA12_AT1G04550                              | .....                                                                               | .....      | .....      | 27  |
| Consensus                                    | .....                                                                               | .....      | .....      |     |
| Conservation                                 |  |            |            |     |

|                                              |            |            |            |     |
|----------------------------------------------|------------|------------|------------|-----|
| Phypa1_1_168019_estExt_fgenes1_pg.C_1630077  | -----      | -----      | -----      | 73  |
| Phypa_218828                                 | -----      | -----      | -----      | 1   |
| Phypa1_1_127416_e_gw1.65.212.1               | -----      | -----      | -----      | 7   |
| Phypa1_1_50215_gw1.6.284.1                   | -----      | -----      | -----      | 3   |
| Phypa_167026                                 | -----      | -----      | -----      | 143 |
| Phypa1_1_136986_e_gw1.133.91.1               | -----      | -----      | -----      | 5   |
| Phypa_188433                                 | -----      | -----      | -----      | 34  |
| Phypa_165321                                 | -----      | -----      | -----      | 23  |
| ARF8_AT5G37020                               | -----      | -----      | -----      | 18  |
| Pt198791_gw1.IV.3880.1                       | -----      | -----      | -----      | 4   |
| ARF6_AT1G30330                               | -----      | -----      | -----      | 19  |
| Pt205407_gw1.V.808.1                         | -----      | -----      | -----      | 4   |
| Selmo1_117217_e_gw1.55.235.1                 | -----      | -----      | -----      | 23  |
| Selmo1_422125                                | -----      | -----      | -----      | 7   |
| Selmo1_424114_fgenes2_pg.C_scaffold_65000063 | -----      | -----      | -----      | 12  |
| Selmo1_446535                                | -----      | -----      | -----      | 12  |
| Selmo1_181406_estExt_Genewise1Plus.C_650169  | -----      | -----      | -----      | 11  |
| ARF19_AT1G19220                              | -----      | -----      | -----      | 19  |
| ARF7_AT5G20730                               | -----      | -----      | -----      | 20  |
| ZmGRMZM2G014864_P01                          | -----      | -----      | -----      | 1   |
| ARF5_AT1G19850                               | -----      | -----      | -----      | 50  |
| Selmo1_437944_estExt_fgenes2_pg.C_10526      | -----      | -----      | -----      | 32  |
| all_Phypa_77324                              | QSNISEHFLW | WMYGGPLSVA | TDWNESVME  | 184 |
| all_Phypa_159688                             | GRGCSEE    | GDVVV      | VVVE       | 73  |
| all_Phypa_225990                             | -----      | -----      | -----      | 3   |
| all_Phypa_171197                             | FSTFSDRRSI | SHPGSPLSLF | LTRALCVSLN | 120 |
| Pt179921_gw1.I.8521.1                        | -----      | -----      | -----      | -   |
| Pt245007gw1.XIV.1750.1                       | -----      | -----      | -----      | -   |
| ARF9_AT4G23980                               | -----      | -----      | -----      | 1   |
| ARF11_AT2G46530                              | -----      | -----      | -----      | 1   |
| ARF18_AT3G61830                              | -----      | -----      | -----      | 1   |
| ARF1_AT1G59750                               | -----      | -----      | -----      | 1   |
| ZmGRMZM2G017187_P02                          | -----      | -----      | -----      | 1   |
| ARF2_AT5G62000                               | -----      | -----      | -----      | 1   |
| ZmGRMZM2G006042_P01                          | -----      | -----      | -----      | 1   |
| Pt179307_gw1.I.7907.1                        | -----      | -----      | -----      | -   |
| ARF21_AT1G34410                              | -----      | -----      | -----      | 3   |
| ARF20_AT1G35240                              | -----      | -----      | -----      | 3   |
| ARF22_AT1G34390                              | -----      | -----      | -----      | 3   |
| ARF12_AT1G34310                              | -----      | -----      | -----      | 3   |
| ARF15_AT1G35520                              | -----      | -----      | -----      | 3   |
| ARF14_AT1G35540                              | -----      | -----      | -----      | 3   |
| ARF13_AT1G34170                              | -----      | -----      | -----      | 2   |
| ARF4_AT5G60450                               | -----      | -----      | -----      | 6   |
| ARF3_AT2G33860                               | -----      | -----      | -----      | 50  |
| Pt243681_gw1.XIV.424.1                       | -----      | -----      | -----      | -   |
| Selmo1_2_61688                               | -----      | -----      | -----      | 3   |
| Selmo1_2_51695                               | -----      | -----      | -----      | 6   |
| Phypa_108888                                 | -----      | -----      | -----      | 11  |
| ARF10_AT2G28350                              | -----      | -----      | -----      | 6   |
| ARF16_AT4G30080                              | -----      | -----      | -----      | 15  |
| Phypa_61245                                  | -----      | -----      | -----      | 14  |
| ZmGRMZM2G005284_P01                          | -----      | -----      | -----      | 32  |
| ARF17_AT1G77850                              | -----      | -----      | -----      | 15  |
| Phypa_170581                                 | -----      | -----      | -----      | 1   |
| all_Phypa_171888                             | -----      | -----      | -----      | 1   |
| Selmo1_2_405821                              | -----      | -----      | -----      | 1   |
| Selmo1_2_431298                              | -----      | -----      | -----      | 1   |
| Selmo1_2_431277                              | -----      | -----      | -----      | 1   |
| corb_UMD_Coleochaete_c9703_c_s_1             | -----      | -----      | -----      | 1   |
| spra_Contig219_1                             | -----      | -----      | -----      | -   |
| IAA12_AT1G04550                              | -----      | -----      | -----      | 27  |
| Consensus                                    | -----      | -----      | -----      | -   |
| Conservation                                 | -----      | -----      | -----      | -   |

|                                              | 340                                                                                 | 360        |            |     |
|----------------------------------------------|-------------------------------------------------------------------------------------|------------|------------|-----|
| Phypa1_1_168019_estExt_fgenes1_pg.C_1630077  | .....                                                                               | .....      | 73         |     |
| Phypa_218828                                 | .....                                                                               | .....      | 1          |     |
| Phypa1_1_127416_e_gw1.65.212.1               | .....                                                                               | .....      | 7          |     |
| Phypa1_1_50215_gw1.6.284.1                   | .....                                                                               | .....      | 3          |     |
| Phypa_167026                                 | .....                                                                               | .....      | 143        |     |
| Phypa1_1_136986_e_gw1.133.91.1               | .....                                                                               | .....      | 5          |     |
| Phypa_188433                                 | .....                                                                               | .....      | 34         |     |
| Phypa_165321                                 | .....                                                                               | .....      | 23         |     |
| ARF8_AT5G37020                               | .....                                                                               | .....      | 18         |     |
| Pt198791_gw1.IV.3880.1                       | .....                                                                               | .....      | 4          |     |
| ARF6_AT1G30330                               | .....                                                                               | .....      | 19         |     |
| Pt205407_gw1.V.808.1                         | .....                                                                               | .....      | 4          |     |
| Selmo1_117217_e_gw1.55.235.1                 | .....                                                                               | .....      | 23         |     |
| Selmo1_422125                                | .....                                                                               | .....      | 7          |     |
| Selmo1_424114_fgenes2_pg.C_scaffold_65000063 | .....                                                                               | .....      | 12         |     |
| Selmo1_446535                                | .....                                                                               | .....      | 12         |     |
| Selmo1_181406_estExt_Genewise1Plus.C_650169  | .....                                                                               | .....      | 11         |     |
| ARF19_AT1G19220                              | .....                                                                               | .....      | 19         |     |
| ARF7_AT5G20730                               | .....                                                                               | .....      | 20         |     |
| ZmGRMZM2G014864_P01                          | .....                                                                               | .....      | 1          |     |
| ARF5_AT1G19850                               | .....                                                                               | .....      | 50         |     |
| Selmo1_437944_estExt_fgenes2_pg.C_10526      | .....                                                                               | .....      | 32         |     |
| all_Phypa_77324                              | KVVIVSTGGS                                                                          | SVVGCVEAVS | GLDRSEPLVR | 214 |
| all_Phypa_159688                             | KEWCVSTAGG                                                                          | SVVGVVESA  | -          | 92  |
| all_Phypa_225990                             | .....                                                                               | .....      | .....      | 3   |
| all_Phypa_171197                             | W-ICLSLASS                                                                          | GPTGDDNHAP | .....      | 139 |
| Pt179921_gw1.I.8521.1                        | .....                                                                               | .....      | .....      | -   |
| Pt245007gw1.XIV.1750.1                       | .....                                                                               | .....      | .....      | -   |
| ARF9_AT4G23980                               | .....                                                                               | .....      | .....      | 1   |
| ARF11_AT2G46530                              | .....                                                                               | .....      | .....      | 1   |
| ARF18_AT3G61830                              | .....                                                                               | .....      | .....      | 1   |
| ARF1_AT1G59750                               | .....                                                                               | .....      | .....      | 1   |
| ZmGRMZM2G017187_P02                          | .....                                                                               | .....      | .....      | 1   |
| ARF2_AT5G62000                               | .....                                                                               | .....      | .....      | 1   |
| ZmGRMZM2G006042_P01                          | .....                                                                               | .....      | .....      | 1   |
| Pt179307_gw1.I.7907.1                        | .....                                                                               | .....      | .....      | -   |
| ARF21_AT1G34410                              | .....                                                                               | .....      | .....      | 3   |
| ARF20_AT1G35240                              | .....                                                                               | .....      | .....      | 3   |
| ARF22_AT1G34390                              | .....                                                                               | .....      | .....      | 3   |
| ARF12_AT1G34310                              | .....                                                                               | .....      | .....      | 3   |
| ARF15_AT1G35520                              | .....                                                                               | .....      | .....      | 3   |
| ARF14_AT1G35540                              | .....                                                                               | .....      | .....      | 3   |
| ARF13_AT1G34170                              | .....                                                                               | .....      | .....      | 2   |
| ARF4_AT5G60450                               | .....                                                                               | .....      | .....      | 6   |
| ARF3_AT2G33860                               | .....                                                                               | .....      | .....      | 50  |
| Pt243681_gw1.XIV.424.1                       | .....                                                                               | .....      | .....      | -   |
| Selmo1_2_61688                               | .....                                                                               | .....      | .....      | 3   |
| Selmo1_2_51695                               | .....                                                                               | .....      | .....      | 6   |
| Phypa_108888                                 | .....                                                                               | .....      | .....      | 11  |
| ARF10_AT2G28350                              | .....                                                                               | .....      | .....      | 6   |
| ARF16_AT4G30080                              | .....                                                                               | .....      | .....      | 15  |
| Phypa_61245                                  | .....                                                                               | .....      | .....      | 14  |
| ZmGRMZM2G005284_P01                          | .....                                                                               | .....      | .....      | 32  |
| ARF17_AT1G77850                              | .....                                                                               | .....      | .....      | 15  |
| Phypa_170581                                 | .....                                                                               | .....      | .....      | 1   |
| all_Phypa_171888                             | WVVVAEYGCSS                                                                         | VLRRFPVLE  | .....      | 22  |
| Selmo1_2_405821                              | .....                                                                               | .....      | .....      | 1   |
| Selmo1_2_431298                              | .....                                                                               | .....      | .....      | 1   |
| Selmo1_2_431277                              | .....                                                                               | .....      | .....      | 1   |
| corb_UMD_Coleochaete_c9703_c_s_1             | .....                                                                               | .....      | .....      | 1   |
| spra_Contig219_1                             | .....                                                                               | .....      | .....      | -   |
| IAA12_AT1G04550                              | .....                                                                               | .....      | .....      | 27  |
| Consensus                                    | .....                                                                               | .....      | .....      |     |
| Conservation                                 |  |            |            |     |



|                                              |            |            |            |     |
|----------------------------------------------|------------|------------|------------|-----|
| Phypha1_1_168019_estExt_fgenes1_pg.C_1630077 | -----      | -----      | -----      | 73  |
| Phypha_218828                                | -----      | -----      | -----      | 1   |
| Phypha1_1_127416_e_gw1.65.212.1              | -----      | -----      | -----      | 7   |
| Phypha1_1_50215_gw1.6.284.1                  | -----      | -----      | -----      | 3   |
| Phypha_167026                                | -----      | -----      | -----      | 143 |
| Phypha1_1_136986_e_gw1.133.91.1              | -----      | -----      | -----      | 5   |
| Phypha_188433                                | -----      | -----      | -----      | 34  |
| Phypha_165321                                | -----      | -----      | -----      | 23  |
| ARF8_AT5G37020                               | -----      | -----      | -----      | 18  |
| Pt198791_gw1.IV.3880.1                       | -----      | -----      | -----      | 4   |
| ARF6_AT1G30330                               | -----      | -----      | -----      | 19  |
| Pt205407_gw1.V.808.1                         | -----      | -----      | -----      | 4   |
| Selmo1_117217_e_gw1.55.235.1                 | -----      | -----      | -----      | 23  |
| Selmo1_422125                                | -----      | -----      | -----      | 7   |
| Selmo1_424114_fgenes2_pg.C_scaffold_65000063 | -----      | -----      | -----      | 12  |
| Selmo1_446535                                | -----      | -----      | -----      | 12  |
| Selmo1_181406_estExt_Genewise1Plus.C_650169  | -----      | -----      | -----      | 11  |
| ARF19_AT1G19220                              | -----      | -----      | -----      | 19  |
| ARF7_AT5G20730                               | -----      | -----      | -----      | 20  |
| ZmGRMZM2G014864_P01                          | -----      | -----      | -----      | 1   |
| ARF5_AT1G19850                               | -----      | -----      | -----      | 50  |
| Selmo1_437944_estExt_fgenes2_pg.C_10526      | -----      | -----      | -----      | 32  |
| all_Phypha_77324                             | RICKRIMFCQ | WEPIRIFTAL | IGSSSLYTMR | 244 |
| all_Phypha_159688                            | -----      | -----      | -----      | 109 |
| all_Phypha_225990                            | -----      | -----      | -----      | 3   |
| all_Phypha_171197                            | -----      | -----      | -----      | 155 |
| Pt179921_gw1.I.8521.1                        | -----      | -----      | -----      | -   |
| Pt245007gw1.XIV.1750.1                       | -----      | -----      | -----      | -   |
| ARF9_AT4G23980                               | -----      | -----      | -----      | 1   |
| ARF11_AT2G46530                              | -----      | -----      | -----      | 1   |
| ARF18_AT3G61830                              | -----      | -----      | -----      | 1   |
| ARF1_AT1G59750                               | -----      | -----      | -----      | 1   |
| ZmGRMZM2G017187_P02                          | -----      | -----      | -----      | 1   |
| ARF2_AT5G62000                               | -----      | -----      | -----      | 1   |
| ZmGRMZM2G006042_P01                          | -----      | -----      | -----      | 1   |
| Pt179307_gw1.I.7907.1                        | -----      | -----      | -----      | -   |
| ARF21_AT1G34410                              | -----      | -----      | -----      | 3   |
| ARF20_AT1G35240                              | -----      | -----      | -----      | 3   |
| ARF22_AT1G34390                              | -----      | -----      | -----      | 3   |
| ARF12_AT1G34310                              | -----      | -----      | -----      | 3   |
| ARF15_AT1G35520                              | -----      | -----      | -----      | 3   |
| ARF14_AT1G35540                              | -----      | -----      | -----      | 3   |
| ARF13_AT1G34170                              | -----      | -----      | -----      | 2   |
| ARF4_AT5G60450                               | -----      | -----      | -----      | 6   |
| ARF3_AT2G33860                               | -----      | -----      | -----      | 50  |
| Pt243681_gw1.XIV.424.1                       | -----      | -----      | -----      | -   |
| Selmo1_2_61688                               | -----      | -----      | -----      | 3   |
| Selmo1_2_51695                               | -----      | -----      | -----      | 6   |
| Phypha_108888                                | -----      | -----      | -----      | 11  |
| ARF10_AT2G28350                              | -----      | -----      | -----      | 6   |
| ARF16_AT4G30080                              | -----      | -----      | -----      | 15  |
| Phypha_61245                                 | -----      | -----      | -----      | 14  |
| ZmGRMZM2G005284_P01                          | -----      | -----      | -----      | 32  |
| ARF17_AT1G77850                              | -----      | -----      | -----      | 15  |
| Phypha_170581                                | -----      | -----      | -----      | 17  |
| all_Phypha_171888                            | RSDDQEFASV | LSVGVQLELG | ILGDLAVLPE | 52  |
| Selmo1_2_405821                              | -----      | -----      | -----      | 1   |
| Selmo1_2_431298                              | -----      | -----      | -----      | 1   |
| Selmo1_2_431277                              | -----      | -----      | -----      | 1   |
| corb_UMD_Coleochaete_c9703_c_s_1             | -----      | -----      | -----      | 1   |
| spra_Contig219_1                             | -----      | -----      | -----      | -   |
| IAA12_AT1G04550                              | -----      | -----      | -----      | 27  |
| Consensus                                    | -----      | -----      | -----      | -   |
| Conservation                                 |            |            |            | -   |

|                                              | 400        | 420        |            |     |
|----------------------------------------------|------------|------------|------------|-----|
| Phypa1_1_168019_estExt_fgenes1_pg.C_1630077  | .....      | .....      | 73         |     |
| Phypa_218828                                 | .....      | .....      | 1          |     |
| Phypa1_1_127416_e_gw1.65.212.1               | .....      | .....      | 7          |     |
| Phypa1_1_50215_gw1.6.284.1                   | .....      | .....      | 3          |     |
| Phypa_167026                                 | .....      | .....      | 143        |     |
| Phypa1_1_136986_e_gw1.133.91.1               | .....      | .....      | 5          |     |
| Phypa_188433                                 | .....      | .....      | 34         |     |
| Phypa_165321                                 | .....      | .....      | 23         |     |
| ARF8_AT5G37020                               | .....      | .....      | 18         |     |
| Pt198791_gw1.IV.3880.1                       | .....      | .....      | 4          |     |
| ARF6_AT1G30330                               | .....      | .....      | 19         |     |
| Pt205407_gw1.V.808.1                         | .....      | .....      | 4          |     |
| Selmo1_117217_e_gw1.55.235.1                 | .....      | .....      | 23         |     |
| Selmo1_422125                                | .....      | .....      | 7          |     |
| Selmo1_424114_fgenes2_pg.C_scaffold_65000063 | .....      | .....      | 12         |     |
| Selmo1_446535                                | .....      | .....      | 12         |     |
| Selmo1_181406_estExt_Genewise1Plus.C_650169  | .....      | .....      | 11         |     |
| ARF19_AT1G19220                              | .....      | .....      | 19         |     |
| ARF7_AT5G20730                               | .....      | .....      | 20         |     |
| ZmGRMZM2G014864_P01                          | .....      | .....      | 1          |     |
| ARF5_AT1G19850                               | .....      | .....      | 50         |     |
| Selmo1_437944_estExt_fgenes2_pg.C_10526      | .....      | .....      | 32         |     |
| all_Phypa_77324                              | EIMDIEFLMV | CFADRIR    | 261        |     |
| all_Phypa_159688                             | VLSVRANLQV | YRPHRIG    | 126        |     |
| all_Phypa_225990                             | .....      | .....      | 3          |     |
| all_Phypa_171197                             | PVLAAPWLLI | ELVHRLGYTH | ITTTWGGCTV | 185 |
| Pt179921_gw1.I.8521.1                        | .....      | .....      | -          |     |
| Pt245007gw1.XIV.1750.1                       | .....      | .....      | -          |     |
| ARF9_AT4G23980                               | .....      | .....      | 1          |     |
| ARF11_AT2G46530                              | .....      | .....      | 1          |     |
| ARF18_AT3G61830                              | .....      | .....      | 1          |     |
| ARF1_AT1G59750                               | .....      | .....      | 1          |     |
| ZmGRMZM2G017187_P02                          | .....      | .....      | 1          |     |
| ARF2_AT5G62000                               | .....      | .....      | 1          |     |
| ZmGRMZM2G006042_P01                          | .....      | .....      | 1          |     |
| Pt179307_gw1.I.7907.1                        | .....      | .....      | -          |     |
| ARF21_AT1G34410                              | .....      | .....      | 3          |     |
| ARF20_AT1G35240                              | .....      | .....      | 3          |     |
| ARF22_AT1G34390                              | .....      | .....      | 3          |     |
| ARF12_AT1G34310                              | .....      | .....      | 3          |     |
| ARF15_AT1G35520                              | .....      | .....      | 3          |     |
| ARF14_AT1G35540                              | .....      | .....      | 3          |     |
| ARF13_AT1G34170                              | .....      | .....      | 2          |     |
| ARF4_AT5G60450                               | .....      | .....      | 6          |     |
| ARF3_AT2G33860                               | .....      | .....      | 50         |     |
| Pt243681_gw1.XIV.424.1                       | .....      | .....      | -          |     |
| Selmo1_2_61688                               | .....      | .....      | 3          |     |
| Selmo1_2_51695                               | .....      | .....      | 6          |     |
| Phypa_108888                                 | .....      | .....      | 11         |     |
| ARF10_AT2G28350                              | .....      | .....      | 6          |     |
| ARF16_AT4G30080                              | .....      | .....      | 15         |     |
| Phypa_61245                                  | .....      | .....      | 14         |     |
| ZmGRMZM2G005284_P01                          | .....      | .....      | 32         |     |
| ARF17_AT1G77850                              | .....      | .....      | 15         |     |
| Phypa_170581                                 | LIFDVVALLT | ITESASSLLV | EVV        | 40  |
| all_Phypa_171888                             | SQFKTVCSLS | LRGSRSLAV  | QEVRSSEFR  | 82  |
| Selmo1_2_405821                              | .....      | .....      | 1          |     |
| Selmo1_2_431298                              | .....      | .....      | 1          |     |
| Selmo1_2_431277                              | .....      | .....      | 1          |     |
| corb_UMD_Coleochaete_c9703_c_s_1             | .....      | .....      | 1          |     |
| spra_Contig219_1                             | .....      | .....      | -          |     |
| IAA12_AT1G04550                              | .....      | .....      | 27         |     |
| Consensus                                    | .....      | .....      |            |     |
| Conservation                                 | .....      | .....      |            |     |

|                                              |                                                               |                                                        |                                                        |     |
|----------------------------------------------|---------------------------------------------------------------|--------------------------------------------------------|--------------------------------------------------------|-----|
| Phypa1_1_168019_estExt_fgenes1_pg.C_1630077  | -----                                                         | -----                                                  | -----                                                  | 73  |
| Phypa_218828                                 | -----                                                         | -----                                                  | -----                                                  | 1   |
| Phypa1_1_127416_e_gw1.65.212.1               | -----                                                         | -----                                                  | -----                                                  | 7   |
| Phypa1_1_50215_gw1.6.284.1                   | -----                                                         | -----                                                  | -----                                                  | 3   |
| Phypa_167026                                 | -----                                                         | -----                                                  | -----                                                  | 143 |
| Phypa1_1_136986_e_gw1.133.91.1               | -----                                                         | -----                                                  | -----                                                  | 5   |
| Phypa_188433                                 | -----                                                         | -----                                                  | -----                                                  | 34  |
| Phypa_165321                                 | -----                                                         | -----                                                  | -----                                                  | 23  |
| ARF8_AT5G37020                               | -----                                                         | -----                                                  | -----                                                  | 18  |
| Pt198791_gw1.IV.3880.1                       | -----                                                         | -----                                                  | -----                                                  | 4   |
| ARF6_AT1G30330                               | -----                                                         | -----                                                  | -----                                                  | 19  |
| Pt205407_gw1.V.808.1                         | -----                                                         | -----                                                  | -----                                                  | 4   |
| Selmo1_117217_e_gw1.55.235.1                 | -----                                                         | -----                                                  | -----                                                  | 23  |
| Selmo1_422125                                | -----                                                         | -----                                                  | -----                                                  | 7   |
| Selmo1_424114_fgenes2_pg.C_scaffold_65000063 | -----                                                         | -----                                                  | -----                                                  | 12  |
| Selmo1_446535                                | -----                                                         | -----                                                  | -----                                                  | 12  |
| Selmo1_181406_estExt_Genewise1Plus.C_650169  | -----                                                         | -----                                                  | -----                                                  | 11  |
| ARF19_AT1G19220                              | -----                                                         | -----                                                  | -----                                                  | 19  |
| ARF7_AT5G20730                               | -----                                                         | -----                                                  | -----                                                  | 20  |
| ZmGRMZM2G014864_P01                          | -----                                                         | -----                                                  | -----                                                  | 1   |
| ARF5_AT1G19850                               | -----                                                         | -----                                                  | -----                                                  | 50  |
| Selmo1_437944_estExt_fgenes2_pg.C_10526      | -----                                                         | -----                                                  | -----                                                  | 32  |
| all_Phypa_77324                              | -----                                                         | -----                                                  | -----                                                  | 261 |
| all_Phypa_159688                             | -----                                                         | -----                                                  | -----                                                  | 126 |
| all_Phypa_225990                             | -----                                                         | -----                                                  | -----                                                  | 3   |
| all_Phypa_171197                             | <b>P</b> G <b>T</b> P <b>G</b> S <b>G</b> Q <b>T</b> <b>Q</b> | <b>M</b> T <b>E</b> T <b>A</b> P <b>P</b> V <b>A</b> P | <b>P</b> S <b>R</b> R <b>G</b> G <b>G</b> K <b>N</b> R | 215 |
| Pt179921_gw1.I.8521.1                        | -----                                                         | -----                                                  | -----                                                  | -   |
| Pt245007gw1.XIV.1750.1                       | -----                                                         | -----                                                  | -----                                                  | -   |
| ARF9_AT4G23980                               | -----                                                         | -----                                                  | -----                                                  | 1   |
| ARF11_AT2G46530                              | -----                                                         | -----                                                  | -----                                                  | 1   |
| ARF18_AT3G61830                              | -----                                                         | -----                                                  | -----                                                  | 1   |
| ARF1_AT1G59750                               | -----                                                         | -----                                                  | -----                                                  | 1   |
| ZmGRMZM2G017187_P02                          | -----                                                         | -----                                                  | -----                                                  | 1   |
| ARF2_AT5G62000                               | -----                                                         | -----                                                  | -----                                                  | 1   |
| ZmGRMZM2G006042_P01                          | -----                                                         | -----                                                  | -----                                                  | 1   |
| Pt179307_gw1.I.7907.1                        | -----                                                         | -----                                                  | -----                                                  | -   |
| ARF21_AT1G34410                              | -----                                                         | -----                                                  | -----                                                  | 3   |
| ARF20_AT1G35240                              | -----                                                         | -----                                                  | -----                                                  | 3   |
| ARF22_AT1G34390                              | -----                                                         | -----                                                  | -----                                                  | 3   |
| ARF12_AT1G34310                              | -----                                                         | -----                                                  | -----                                                  | 3   |
| ARF15_AT1G35520                              | -----                                                         | -----                                                  | -----                                                  | 3   |
| ARF14_AT1G35540                              | -----                                                         | -----                                                  | -----                                                  | 3   |
| ARF13_AT1G34170                              | -----                                                         | -----                                                  | -----                                                  | 2   |
| ARF4_AT5G60450                               | -----                                                         | -----                                                  | -----                                                  | 6   |
| ARF3_AT2G33860                               | -----                                                         | -----                                                  | -----                                                  | 50  |
| Pt243681_gw1.XIV.424.1                       | -----                                                         | -----                                                  | -----                                                  | -   |
| Selmo1_2_61688                               | -----                                                         | -----                                                  | -----                                                  | 3   |
| Selmo1_2_51695                               | -----                                                         | -----                                                  | -----                                                  | 6   |
| Phypa_108888                                 | -----                                                         | -----                                                  | -----                                                  | 11  |
| ARF10_AT2G28350                              | -----                                                         | -----                                                  | -----                                                  | 6   |
| ARF16_AT4G30080                              | -----                                                         | -----                                                  | -----                                                  | 15  |
| Phypa_61245                                  | -----                                                         | -----                                                  | -----                                                  | 14  |
| ZmGRMZM2G005284_P01                          | -----                                                         | -----                                                  | -----                                                  | 32  |
| ARF17_AT1G77850                              | -----                                                         | -----                                                  | -----                                                  | 15  |
| Phypa_170581                                 | -----                                                         | -----                                                  | -----                                                  | 40  |
| all_Phypa_171888                             | <b>P</b> G <b>I</b> Y <b>H</b> V <b>L</b> R <b>V</b> A        | <b>F</b> K <b>R</b> G <b>H</b> G <b>Y</b> Q <b>Y</b>   | <b>G</b> R <b>R</b> S <b>N</b> F <b>F</b> T <b>A</b> T | 112 |
| Selmo1_2_405821                              | -----                                                         | -----                                                  | -----                                                  | 1   |
| Selmo1_2_431298                              | -----                                                         | -----                                                  | -----                                                  | 1   |
| Selmo1_2_431277                              | -----                                                         | -----                                                  | -----                                                  | 1   |
| corb_UMD_Coleochaete_c9703_c_s_1             | -----                                                         | -----                                                  | -----                                                  | 1   |
| spra_Contig219_1                             | -----                                                         | -----                                                  | -----                                                  | -   |
| IAA12_AT1G04550                              | -----                                                         | -----                                                  | -----                                                  | 27  |
| Consensus                                    | -----                                                         | -----                                                  | -----                                                  |     |
| Conservation                                 |                                                               |                                                        |                                                        |     |

|                                              | 460        | 480        |            |     |
|----------------------------------------------|------------|------------|------------|-----|
| Phypa1_1_168019_estExt_fgenes1_pg.C_1630077  | -----      | -----      | 73         |     |
| Phypa_218828                                 | -----      | -----      | 1          |     |
| Phypa1_1_127416_e_gw1.65.212.1               | -----      | -----      | 7          |     |
| Phypa1_1_50215_gw1.6.284.1                   | -----      | -----      | 3          |     |
| Phypa_167026                                 | -----      | -----      | 143        |     |
| Phypa1_1_136986_e_gw1.133.91.1               | -----      | -----      | 5          |     |
| Phypa_188433                                 | -----      | -----      | 34         |     |
| Phypa_165321                                 | -----      | -----      | 23         |     |
| ARF8_AT5G37020                               | -----      | -----      | 18         |     |
| Pt198791_gw1.IV.3880.1                       | -----      | -----      | 4          |     |
| ARF6_AT1G30330                               | -----      | -----      | 19         |     |
| Pt205407_gw1.V.808.1                         | -----      | -----      | 4          |     |
| Selmo1_117217_e_gw1.55.235.1                 | -----      | -----      | 23         |     |
| Selmo1_422125                                | -----      | -----      | 7          |     |
| Selmo1_424114_fgenes2_pg.C_scaffold_65000063 | -----      | -----      | 12         |     |
| Selmo1_446535                                | -----      | -----      | 12         |     |
| Selmo1_181406_estExt_Genewise1Plus.C_650169  | -----      | -----      | 11         |     |
| ARF19_AT1G19220                              | -----      | -----      | 19         |     |
| ARF7_AT5G20730                               | -----      | -----      | 20         |     |
| ZmGRMZM2G014864_P01                          | -----      | -----      | 1          |     |
| ARF5_AT1G19850                               | -----      | -----      | 50         |     |
| Selmo1_437944_estExt_fgenes2_pg.C_10526      | -----      | -----      | 32         |     |
| all_Phypa_77324                              | -----      | ELPGSALKQE | 271        |     |
| all_Phypa_159688                             | -----      | ELSESALRQE | 136        |     |
| all_Phypa_225990                             | -----      | -----      | 3          |     |
| all_Phypa_171197                             | MGSKGPGMGG | VGDGDNVAG  | SAAGRHASRQ | 245 |
| Pt179921_gw1.I.8521.1                        | -----      | -----      | -          |     |
| Pt245007gw1.XIV.1750.1                       | -----      | -----      | -          |     |
| ARF9_AT4G23980                               | -----      | -----      | 1          |     |
| ARF11_AT2G46530                              | -----      | -----      | 1          |     |
| ARF18_AT3G61830                              | -----      | -----      | 1          |     |
| ARF1_AT1G59750                               | -----      | -----      | 1          |     |
| ZmGRMZM2G017187_P02                          | -----      | -----      | 1          |     |
| ARF2_AT5G62000                               | -----      | -----      | 1          |     |
| ZmGRMZM2G006042_P01                          | -----      | -----      | 1          |     |
| Pt179307_gw1.I.7907.1                        | -----      | -----      | -          |     |
| ARF21_AT1G34410                              | -----      | -----      | 3          |     |
| ARF20_AT1G35240                              | -----      | -----      | 3          |     |
| ARF22_AT1G34390                              | -----      | -----      | 3          |     |
| ARF12_AT1G34310                              | -----      | -----      | 3          |     |
| ARF15_AT1G35520                              | -----      | -----      | 3          |     |
| ARF14_AT1G35540                              | -----      | -----      | 3          |     |
| ARF13_AT1G34170                              | -----      | -----      | 2          |     |
| ARF4_AT5G60450                               | -----      | -----      | 6          |     |
| ARF3_AT2G33860                               | -----      | -----      | 50         |     |
| Pt243681_gw1.XIV.424.1                       | -----      | -----      | -          |     |
| Selmo1_2_61688                               | -----      | -----      | 3          |     |
| Selmo1_2_51695                               | -----      | -----      | 6          |     |
| Phypa_108888                                 | -----      | -----      | 11         |     |
| ARF10_AT2G28350                              | -----      | -----      | 6          |     |
| ARF16_AT4G30080                              | -----      | -----      | 15         |     |
| Phypa_61245                                  | -----      | -----      | 14         |     |
| ZmGRMZM2G005284_P01                          | -----      | -----      | 32         |     |
| ARF17_AT1G77850                              | -----      | -----      | 15         |     |
| Phypa_170581                                 | -----      | -----      | 50         |     |
| all_Phypa_171888                             | LTGRKKTSY  | KYGQWRTKSC | CYSESSTKTE | 142 |
| Selmo1_2_405821                              | -----      | -----      | 1          |     |
| Selmo1_2_431298                              | -----      | -----      | 1          |     |
| Selmo1_2_431277                              | -----      | -----      | 1          |     |
| corb_UMD_Coleochaete_c9703_c_s_1             | -----      | -----      | 1          |     |
| spra_Contig219_1                             | -----      | -----      | -          |     |
| IAA12_AT1G04550                              | -----      | -----      | 27         |     |
| Consensus                                    | -----      | -----      | -----      |     |
| Conservation                                 | -----      | -----      | -----      |     |

|                                              |                                                                                     |                            |                          |     |
|----------------------------------------------|-------------------------------------------------------------------------------------|----------------------------|--------------------------|-----|
| Phypa1_1_168019_estExt_fgenes1_pg.C_1630077  | -----                                                                               | -----                      | -----                    | 73  |
| Phypa_218828                                 | -----                                                                               | -----                      | -----                    | 1   |
| Phypa1_1_127416_e_gw1.65.212.1               | -----                                                                               | -----                      | -----                    | 7   |
| Phypa1_1_50215_gw1.6.284.1                   | -----                                                                               | -----                      | -----                    | 3   |
| Phypa_167026                                 | -----                                                                               | -----                      | -----                    | 143 |
| Phypa1_1_136986_e_gw1.133.91.1               | -----                                                                               | -----                      | -----                    | 5   |
| Phypa_188433                                 | -----                                                                               | -----                      | -----                    | 34  |
| Phypa_165321                                 | -----                                                                               | -----                      | -----                    | 23  |
| ARF8_AT5G37020                               | -----                                                                               | -----                      | -----                    | 18  |
| Pt198791_gw1.IV.3880.1                       | -----                                                                               | -----                      | -----                    | 4   |
| ARF6_AT1G30330                               | -----                                                                               | -----                      | -----                    | 19  |
| Pt205407_gw1.V.808.1                         | -----                                                                               | -----                      | -----                    | 4   |
| Selmo1_117217_e_gw1.55.235.1                 | -----                                                                               | -----                      | -----                    | 23  |
| Selmo1_422125                                | -----                                                                               | -----                      | -----                    | 7   |
| Selmo1_424114_fgenes2_pg.C_scaffold_65000063 | -----                                                                               | -----                      | -----                    | 12  |
| Selmo1_446535                                | -----                                                                               | -----                      | -----                    | 12  |
| Selmo1_181406_estExt_Genewise1Plus.C_650169  | -----                                                                               | -----                      | -----                    | 11  |
| ARF19_AT1G19220                              | -----                                                                               | -----                      | -----                    | 19  |
| ARF7_AT5G20730                               | -----                                                                               | -----                      | -----                    | 20  |
| ZmGRMZM2G014864_P01                          | -----                                                                               | -----                      | -----                    | 1   |
| ARF5_AT1G19850                               | -----                                                                               | -----                      | -----                    | 50  |
| Selmo1_437944_estExt_fgenes2_pg.C_10526      | -----                                                                               | -----                      | -----                    | 32  |
| all_Phypa_77324                              | <b>MHYGGMHGG</b>                                                                    | -----                      | <b>MRSFDE</b>            | 287 |
| all_Phypa_159688                             | <b>RMQY</b> - - <b>YGG</b>                                                          | -----                      | <b>MRGFDE</b>            | 149 |
| all_Phypa_225990                             | -----                                                                               | -----                      | -----                    | 3   |
| all_Phypa_171197                             | <b>RHQWGNQGG</b>                                                                    | <b>GGPLSRKARF</b>          | <b>RGAQMRDADR</b>        | 275 |
| Pt179921_gw1.I.8521.1                        | -----                                                                               | -----                      | -----                    | -   |
| Pt245007gw1.XIV.1750.1                       | -----                                                                               | -----                      | -----                    | -   |
| ARF9_AT4G23980                               | -----                                                                               | -----                      | -----                    | 1   |
| ARF11_AT2G46530                              | -----                                                                               | -----                      | -----                    | 1   |
| ARF18_AT3G61830                              | -----                                                                               | -----                      | -----                    | 1   |
| ARF1_AT1G59750                               | -----                                                                               | -----                      | -----                    | 1   |
| ZmGRMZM2G017187_P02                          | -----                                                                               | -----                      | -----                    | 1   |
| ARF2_AT5G62000                               | -----                                                                               | -----                      | -----                    | 1   |
| ZmGRMZM2G006042_P01                          | -----                                                                               | -----                      | -----                    | 1   |
| Pt179307_gw1.I.7907.1                        | -----                                                                               | -----                      | -----                    | -   |
| ARF21_AT1G34410                              | -----                                                                               | -----                      | -----                    | 3   |
| ARF20_AT1G35240                              | -----                                                                               | -----                      | -----                    | 3   |
| ARF22_AT1G34390                              | -----                                                                               | -----                      | -----                    | 3   |
| ARF12_AT1G34310                              | -----                                                                               | -----                      | -----                    | 3   |
| ARF15_AT1G35520                              | -----                                                                               | -----                      | -----                    | 3   |
| ARF14_AT1G35540                              | -----                                                                               | -----                      | -----                    | 3   |
| ARF13_AT1G34170                              | -----                                                                               | -----                      | -----                    | 2   |
| ARF4_AT5G60450                               | -----                                                                               | -----                      | -----                    | 6   |
| ARF3_AT2G33860                               | -----                                                                               | -----                      | -----                    | 50  |
| Pt243681_gw1.XIV.424.1                       | -----                                                                               | -----                      | -----                    | -   |
| Selmo1_2_61688                               | -----                                                                               | -----                      | -----                    | 3   |
| Selmo1_2_51695                               | -----                                                                               | -----                      | -----                    | 6   |
| Phypa_108888                                 | -----                                                                               | -----                      | -----                    | 11  |
| ARF10_AT2G28350                              | -----                                                                               | -----                      | -----                    | 6   |
| ARF16_AT4G30080                              | -----                                                                               | -----                      | -----                    | 15  |
| Phypa_61245                                  | -----                                                                               | -----                      | -----                    | 14  |
| ZmGRMZM2G005284_P01                          | -----                                                                               | -----                      | -----                    | 32  |
| ARF17_AT1G77850                              | -----                                                                               | -----                      | -----                    | 15  |
| Phypa_170581                                 | <b>RDDPRAPP</b>                                                                     | <b>HANENGLAS</b>           | <b>QSQRRE</b> <b>GHP</b> | 79  |
| all_Phypa_171888                             | <b>SRVDYTV</b> <b>EPA</b>                                                           | <b>HTTW</b> <b>G</b> - - - | <b>GKRRRE</b> <b>GF</b>  | 168 |
| Selmo1_2_405821                              | -----                                                                               | -----                      | -----                    | 1   |
| Selmo1_2_431298                              | -----                                                                               | -----                      | -----                    | 1   |
| Selmo1_2_431277                              | -----                                                                               | -----                      | -----                    | 1   |
| corb_UMD_Coleochaete_c9703_c_s_1             | -----                                                                               | -----                      | -----                    | 1   |
| spra_Contig219_1                             | -----                                                                               | -----                      | -----                    | -   |
| IAA12_AT1G04550                              | -----                                                                               | -----                      | -----                    | 27  |
| Consensus                                    | -----                                                                               | -----                      | -----                    | -   |
| Conservation                                 | 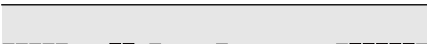 |                            |                          |     |

|                                              | 520                                                                                                                                                                  | 540   |       |
|----------------------------------------------|----------------------------------------------------------------------------------------------------------------------------------------------------------------------|-------|-------|
| Phypa1_1_168019_estExt_fgenes1_pg.C_1630077  | -----                                                                                                                                                                | ----- | 73    |
| Phypa_218828                                 | -----                                                                                                                                                                | ----- | 1     |
| Phypa1_1_127416_e_gw1.65.212.1               | -----                                                                                                                                                                | ----- | 7     |
| Phypa1_1_50215_gw1.6.284.1                   | -----                                                                                                                                                                | ----- | 3     |
| Phypa_167026                                 | -----                                                                                                                                                                | ----- | 143   |
| Phypa1_1_136986_e_gw1.133.91.1               | -----                                                                                                                                                                | ----- | 5     |
| Phypa_188433                                 | -----                                                                                                                                                                | ----- | 34    |
| Phypa_165321                                 | -----                                                                                                                                                                | ----- | 23    |
| ARF8_AT5G37020                               | -----                                                                                                                                                                | ----- | 18    |
| Pt198791_gw1.IV.3880.1                       | -----                                                                                                                                                                | ----- | 4     |
| ARF6_AT1G30330                               | -----                                                                                                                                                                | ----- | 19    |
| Pt205407_gw1.V.808.1                         | -----                                                                                                                                                                | ----- | 4     |
| Selmo1_117217_e_gw1.55.235.1                 | -----                                                                                                                                                                | ----- | 23    |
| Selmo1_422125                                | -----                                                                                                                                                                | ----- | 7     |
| Selmo1_424114_fgenes2_pg.C_scaffold_65000063 | -----                                                                                                                                                                | ----- | 12    |
| Selmo1_446535                                | -----                                                                                                                                                                | ----- | 12    |
| Selmo1_181406_estExt_Genewise1Plus.C_650169  | -----                                                                                                                                                                | ----- | 11    |
| ARF19_AT1G19220                              | -----                                                                                                                                                                | ----- | 19    |
| ARF7_AT5G20730                               | -----                                                                                                                                                                | ----- | 20    |
| ZmGRMZM2G014864_P01                          | -----                                                                                                                                                                | ----- | 1     |
| ARF5_AT1G19850                               | -----                                                                                                                                                                | ----- | 50    |
| Selmo1_437944_estExt_fgenes2_pg.C_10526      | -----                                                                                                                                                                | ----- | 32    |
| all_Phypa_77324                              | -----                                                                                                                                                                | ----- | 287   |
| all_Phypa_159688                             | -----                                                                                                                                                                | ----- | 149   |
| all_Phypa_225990                             | -----                                                                                                                                                                | ----- | 3     |
| all_Phypa_171197                             | <b>I</b> P <b>F</b> V <b>G</b> L <b>L</b> R <b>E</b> L <b>S</b> S <b>E</b> M <b>A</b> R <b>K</b> E <b>G</b> K <b>K</b> D <b>I</b> V <b>W</b> I <b>T</b> L <b>Q</b>   | ----- | 305   |
| Pt179921_gw1.I.8521.1                        | -----                                                                                                                                                                | ----- | -     |
| Pt245007gw1.XIV.1750.1                       | -----                                                                                                                                                                | ----- | -     |
| ARF9_AT4G23980                               | -----                                                                                                                                                                | ----- | 1     |
| ARF11_AT2G46530                              | -----                                                                                                                                                                | ----- | 1     |
| ARF18_AT3G61830                              | -----                                                                                                                                                                | ----- | 1     |
| ARF1_AT1G59750                               | -----                                                                                                                                                                | ----- | 1     |
| ZmGRMZM2G017187_P02                          | -----                                                                                                                                                                | ----- | 1     |
| ARF2_AT5G62000                               | -----                                                                                                                                                                | ----- | 1     |
| ZmGRMZM2G006042_P01                          | -----                                                                                                                                                                | ----- | 1     |
| Pt179307_gw1.I.7907.1                        | -----                                                                                                                                                                | ----- | -     |
| ARF21_AT1G34410                              | -----                                                                                                                                                                | ----- | 3     |
| ARF20_AT1G35240                              | -----                                                                                                                                                                | ----- | 3     |
| ARF22_AT1G34390                              | -----                                                                                                                                                                | ----- | 3     |
| ARF12_AT1G34310                              | -----                                                                                                                                                                | ----- | 3     |
| ARF15_AT1G35520                              | -----                                                                                                                                                                | ----- | 3     |
| ARF14_AT1G35540                              | -----                                                                                                                                                                | ----- | 3     |
| ARF13_AT1G34170                              | -----                                                                                                                                                                | ----- | 2     |
| ARF4_AT5G60450                               | -----                                                                                                                                                                | ----- | 6     |
| ARF3_AT2G33860                               | -----                                                                                                                                                                | ----- | 50    |
| Pt243681_gw1.XIV.424.1                       | -----                                                                                                                                                                | ----- | -     |
| Selmo1_2_61688                               | -----                                                                                                                                                                | ----- | 3     |
| Selmo1_2_51695                               | -----                                                                                                                                                                | ----- | 6     |
| Phypa_108888                                 | -----                                                                                                                                                                | ----- | 11    |
| ARF10_AT2G28350                              | -----                                                                                                                                                                | ----- | 6     |
| ARF16_AT4G30080                              | -----                                                                                                                                                                | ----- | 15    |
| Phypa_61245                                  | -----                                                                                                                                                                | ----- | 14    |
| ZmGRMZM2G005284_P01                          | -----                                                                                                                                                                | ----- | 32    |
| ARF17_AT1G77850                              | -----                                                                                                                                                                | ----- | 15    |
| Phypa_170581                                 | <b>D</b> E <b>D</b> L <b>K</b> E <b>V</b> K <b>E</b> T <b>R</b> Q <b>W</b> Y <b>G</b> S <b>Q</b> R <b>A</b> D <b>D</b> D <b>V</b> T <b>E</b> G <b>F</b> Q <b>N</b> N | ----- | 109   |
| all_Phypa_171888                             | <b>D</b> E <b>D</b> V <b>K</b> G <b>V</b> K <b>S</b> S <b>R</b> Q <b>V</b> Y <b>G</b> L <b>Q</b> N <b>A</b> V <b>D</b> D <b>S</b> N <b>E</b> G <b>F</b> Q <b>N</b> N | ----- | 198   |
| Selmo1_2_405821                              | -----                                                                                                                                                                | ----- | 1     |
| Selmo1_2_431298                              | -----                                                                                                                                                                | ----- | 1     |
| Selmo1_2_431277                              | -----                                                                                                                                                                | ----- | 1     |
| corb_UMD_Coleochaete_c9703_c_s_1             | -----                                                                                                                                                                | ----- | 1     |
| spra_Contig219_1                             | -----                                                                                                                                                                | ----- | -     |
| IAA12_AT1G04550                              | -----                                                                                                                                                                | ----- | 27    |
| Consensus                                    | -----                                                                                                                                                                | ----- | ----- |
| Conservation                                 | -----                                                                                                                                                                | ----- | ----- |

|                                              |       |       |       |     |
|----------------------------------------------|-------|-------|-------|-----|
| Phypa1_1_168019_estExt_fgenes1_pg.C_1630077  | ----- | ----- | ----- | 73  |
| Phypa_218828                                 | ----- | ----- | ----- | 1   |
| Phypa1_1_127416_e_gw1.65.212.1               | ----- | ----- | ----- | 7   |
| Phypa1_1_50215_gw1.6.284.1                   | ----- | ----- | ----- | 3   |
| Phypa_167026                                 | ----- | ----- | ----- | 143 |
| Phypa1_1_136986_e_gw1.133.91.1               | ----- | ----- | ----- | 5   |
| Phypa_188433                                 | ----- | ----- | ----- | 34  |
| Phypa_165321                                 | ----- | ----- | ----- | 23  |
| ARF8_AT5G37020                               | ----- | ----- | ----- | 18  |
| Pt198791_gw1.IV.3880.1                       | ----- | ----- | ----- | 4   |
| ARF6_AT1G30330                               | ----- | ----- | ----- | 19  |
| Pt205407_gw1.V.808.1                         | ----- | ----- | ----- | 4   |
| Selmo1_117217_e_gw1.55.235.1                 | ----- | ----- | ----- | 23  |
| Selmo1_422125                                | ----- | ----- | ----- | 7   |
| Selmo1_424114_fgenes2_pg.C_scaffold_65000063 | ----- | ----- | ----- | 12  |
| Selmo1_446535                                | ----- | ----- | ----- | 12  |
| Selmo1_181406_estExt_Genewise1Plus.C_650169  | ----- | ----- | ----- | 11  |
| ARF19_AT1G19220                              | ----- | ----- | ----- | 19  |
| ARF7_AT5G20730                               | ----- | ----- | ----- | 20  |
| ZmGRMZM2G014864_P01                          | ----- | ----- | ----- | 1   |
| ARF5_AT1G19850                               | ----- | ----- | ----- | 50  |
| Selmo1_437944_estExt_fgenes2_pg.C_10526      | ----- | ----- | ----- | 32  |
| all_Phypa_77324                              | ----- | ----- | ----- | 287 |
| all_Phypa_159688                             | ----- | ----- | ----- | 149 |
| all_Phypa_225990                             | ----- | ----- | ----- | 3   |
| all_Phypa_171197                             | ----- | ----- | ----- | 335 |
| Pt179921_gw1.I.8521.1                        | ----- | ----- | ----- | -   |
| Pt245007gw1.XIV.1750.1                       | ----- | ----- | ----- | -   |
| ARF9_AT4G23980                               | ----- | ----- | ----- | 1   |
| ARF11_AT2G46530                              | ----- | ----- | ----- | 1   |
| ARF18_AT3G61830                              | ----- | ----- | ----- | 1   |
| ARF1_AT1G59750                               | ----- | ----- | ----- | 1   |
| ZmGRMZM2G017187_P02                          | ----- | ----- | ----- | 1   |
| ARF2_AT5G62000                               | ----- | ----- | ----- | 1   |
| ZmGRMZM2G006042_P01                          | ----- | ----- | ----- | 1   |
| Pt179307_gw1.I.7907.1                        | ----- | ----- | ----- | -   |
| ARF21_AT1G34410                              | ----- | ----- | ----- | 3   |
| ARF20_AT1G35240                              | ----- | ----- | ----- | 3   |
| ARF22_AT1G34390                              | ----- | ----- | ----- | 3   |
| ARF12_AT1G34310                              | ----- | ----- | ----- | 3   |
| ARF15_AT1G35520                              | ----- | ----- | ----- | 3   |
| ARF14_AT1G35540                              | ----- | ----- | ----- | 3   |
| ARF13_AT1G34170                              | ----- | ----- | ----- | 2   |
| ARF4_AT5G60450                               | ----- | ----- | ----- | 6   |
| ARF3_AT2G33860                               | ----- | ----- | ----- | 50  |
| Pt243681_gw1.XIV.424.1                       | ----- | ----- | ----- | -   |
| Selmo1_2_61688                               | ----- | ----- | ----- | 3   |
| Selmo1_2_51695                               | ----- | ----- | ----- | 6   |
| Phypa_108888                                 | ----- | ----- | ----- | 11  |
| ARF10_AT2G28350                              | ----- | ----- | ----- | 6   |
| ARF16_AT4G30080                              | ----- | ----- | ----- | 15  |
| Phypa_61245                                  | ----- | ----- | ----- | 14  |
| ZmGRMZM2G005284_P01                          | ----- | ----- | ----- | 32  |
| ARF17_AT1G77850                              | ----- | ----- | ----- | 15  |
| Phypa_170581                                 | ----- | ----- | ----- | 139 |
| all_Phypa_171888                             | ----- | ----- | ----- | 224 |
| Selmo1_2_405821                              | ----- | ----- | ----- | 1   |
| Selmo1_2_431298                              | ----- | ----- | ----- | 1   |
| Selmo1_2_431277                              | ----- | ----- | ----- | 1   |
| corb_UMD_Coleochaete_c9703_c_s_1             | ----- | ----- | ----- | 1   |
| spra_Contig219_1                             | ----- | ----- | ----- | -   |
| IAA12_AT1G04550                              | ----- | ----- | ----- | 27  |
| Consensus                                    | ----- | ----- | ----- | -   |
| Conservation                                 | ----- | ----- | ----- | -   |

|                                              | 580                | 600               |                   |                |           |    |
|----------------------------------------------|--------------------|-------------------|-------------------|----------------|-----------|----|
| Phypa1_1_168019_estExt_fgenes1_pg.C_1630077  | .....              | .....             | 73                |                |           |    |
| Phypa_218828                                 | .....              | .....             | 1                 |                |           |    |
| Phypa1_1_127416_e_gw1.65.212.1               | .....              | .....             | 7                 |                |           |    |
| Phypa1_1_50215_gw1.6.284.1                   | .....              | .....             | 3                 |                |           |    |
| Phypa_167026                                 | .....              | .....             | 143               |                |           |    |
| Phypa1_1_136986_e_gw1.133.91.1               | .....              | .....             | 5                 |                |           |    |
| Phypa_188433                                 | .....              | .....             | 34                |                |           |    |
| Phypa_165321                                 | .....              | .....             | 23                |                |           |    |
| ARF8_AT5G37020                               | .....              | .....             | 18                |                |           |    |
| Pt198791_gw1.IV.3880.1                       | .....              | .....             | 4                 |                |           |    |
| ARF6_AT1G30330                               | .....              | .....             | 19                |                |           |    |
| Pt205407_gw1.V.808.1                         | .....              | .....             | 4                 |                |           |    |
| Selmo1_117217_e_gw1.55.235.1                 | .....              | .....             | 23                |                |           |    |
| Selmo1_422125                                | .....              | .....             | 7                 |                |           |    |
| Selmo1_424114_fgenes2_pg.C_scaffold_65000063 | .....              | .....             | 12                |                |           |    |
| Selmo1_446535                                | .....              | .....             | 12                |                |           |    |
| Selmo1_181406_estExt_Genewise1Plus.C_650169  | .....              | .....             | 11                |                |           |    |
| ARF19_AT1G19220                              | .....              | .....             | 19                |                |           |    |
| ARF7_AT5G20730                               | .....              | .....             | 20                |                |           |    |
| ZmGRMZM2G014864_P01                          | .....              | .....             | 1                 |                |           |    |
| ARF5_AT1G19850                               | .....              | .....             | 50                |                |           |    |
| Selmo1_437944_estExt_fgenes2_pg.C_10526      | .....              | .....             | 32                |                |           |    |
| all_Phypa_77324                              | .....              | .....             | 287               |                |           |    |
| all_Phypa_159688                             | .....              | .....             | 149               |                |           |    |
| all_Phypa_225990                             | .....              | .....             | 3                 |                |           |    |
| all_Phypa_171197                             | <b>VQFLWRWGCE</b>  | <b>AFRLIASFTC</b> | <b>PERGRARVEY</b> | 365            |           |    |
| Pt179921_gw1.I.8521.1                        | .....              | DD                | .....             | 2              |           |    |
| Pt245007gw1.XIV.1750.1                       | .....              | DD                | .....             | 2              |           |    |
| ARF9_AT4G23980                               | AN                 | <b>RGGEY</b>      | .....             | 8              |           |    |
| ARF11_AT2G46530                              | AN                 | <b>VEAD</b>       | <b>FRTS</b>       | <b>GSND</b>    | <b>DE</b> | 17 |
| ARF18_AT3G61830                              | AS                 | <b>VEGDDDFGSS</b> | <b>SSRSYQDQ</b>   | .....          | 21        |    |
| ARF1_AT1G59750                               | AA                 | <b>S</b>          | <b>NHSSG</b>      | <b>KPGGLSD</b> | .....     | 17 |
| ZmGRMZM2G017187_P02                          | AA                 | <b>AMDAPNPGAA</b> | <b>AGPGMPSD</b>   | .....          | 21        |    |
| ARF2_AT5G62000                               | AS                 | <b>SEVSMKGNRG</b> | <b>GDNFSSSGFS</b> | .....          | 23        |    |
| ZmGRMZM2G006042_P01                          | A                  | <b>AAAAAAGG</b>   | <b>ADAGCGGG</b>   | .....          | 19        |    |
| Pt179307_gw1.I.7907.1                        | .....              | .....             | .....             | .....          | .....     |    |
| ARF21_AT1G34410                              | .....              | .....             | .....             | .....          | 3         |    |
| ARF20_AT1G35240                              | .....              | .....             | .....             | .....          | 3         |    |
| ARF22_AT1G34390                              | .....              | .....             | .....             | .....          | 3         |    |
| ARF12_AT1G34310                              | .....              | .....             | .....             | .....          | 3         |    |
| ARF15_AT1G35520                              | .....              | .....             | .....             | .....          | 3         |    |
| ARF14_AT1G35540                              | .....              | .....             | .....             | .....          | 3         |    |
| ARF13_AT1G34170                              | .....              | .....             | .....             | .....          | 2         |    |
| ARF4_AT5G60450                               | T                  | <b>EIAEVEEEEN</b> | <b>DDVGVGVGGG</b> | .....          | 27        |    |
| ARF3_AT2G33860                               | .....              | .....             | .....             | .....          | 50        |    |
| Pt243681_gw1.XIV.424.1                       | .....              | .....             | .....             | .....          | .....     |    |
| Selmo1_2_61688                               | .....              | .....             | .....             | .....          | 3         |    |
| Selmo1_2_51695                               | .....              | .....             | .....             | .....          | 6         |    |
| Phypa_108888                                 | .....              | .....             | .....             | .....          | 11        |    |
| ARF10_AT2G28350                              | .....              | .....             | .....             | .....          | 6         |    |
| ARF16_AT4G30080                              | .....              | .....             | .....             | .....          | 15        |    |
| Phypa_61245                                  | .....              | .....             | .....             | .....          | 14        |    |
| ZmGRMZM2G005284_P01                          | .....              | .....             | .....             | .....          | 32        |    |
| ARF17_AT1G77850                              | .....              | .....             | .....             | .....          | 15        |    |
| Phypa_170581                                 | <b>VMSPVVPHEN</b>  | <b>MQQRVEAAAA</b> | <b>LQDLRGNVAF</b> | .....          | 169       |    |
| all_Phypa_171888                             | <b>AMAPVVVTHEN</b> | <b>MQQRVEAAAA</b> | <b>LQDLRGNITF</b> | .....          | 254       |    |
| Selmo1_2_405821                              | .....              | .....             | .....             | .....          | 1         |    |
| Selmo1_2_431298                              | .....              | .....             | .....             | .....          | 1         |    |
| Selmo1_2_431277                              | .....              | .....             | .....             | .....          | 1         |    |
| corb_UMD_Coleochaete_c9703_c_s_1             | .....              | .....             | .....             | .....          | 1         |    |
| spra_Contig219_1                             | .....              | .....             | .....             | .....          | .....     |    |
| IAA12_AT1G04550                              | .....              | .....             | .....             | .....          | 27        |    |
| Consensus                                    | .....              | .....             | .....             | .....          | .....     |    |
| Conservation                                 |                    |                   |                   |                | .....     |    |



|                                             |       |       |       |         |
|---------------------------------------------|-------|-------|-------|---------|
| Phypa1_1_168019_estExt_fgenes1_pg.C_1630077 | ----- | ----- | ----- | 73      |
| Phypa_218828                                | ----- | ----- | ----- | 1       |
| Phypa1_1_127416_e_gw1.65.212.1              | ----- | ----- | ----- | 7       |
| Phypa1_1_50215_gw1.6.284.1                  | ----- | ----- | ----- | 3       |
| Phypa_167026                                | ----- | ----- | ----- | 143     |
| Phypa1_1_136986_e_gw1.133.91.1              | ----- | ----- | ----- | 5       |
| Phypa_188433                                | ----- | ----- | ----- | 34      |
| Phypa_165321                                | ----- | ----- | ----- | 23      |
| ARF8_AT5G37020                              | ----- | ----- | ----- | 18      |
| Pt198791_gw1.IV.3880.1                      | ----- | ----- | ----- | 4       |
| ARF6_AT1G30330                              | ----- | ----- | ----- | 19      |
| Pt205407_gw1.V.808.1                        | ----- | ----- | ----- | 4       |
| Selmo1_117217_e_gw1.55.235.1                | ----- | ----- | ----- | 23      |
| Selmo1_422125                               | ----- | ----- | ----- | 7       |
| Selmo1_424114_fgenes2_pg.C_scaffold_6500063 | ----- | ----- | ----- | 12      |
| Selmo1_446535                               | ----- | ----- | ----- | 12      |
| Selmo1_181406_estExt_Genewise1Plus.C_650169 | ----- | ----- | ----- | 11      |
| ARF19_AT1G19220                             | ----- | ----- | ----- | 19      |
| ARF7_AT5G20730                              | ----- | ----- | ----- | 20      |
| ZmGRMZM2G014864_P01                         | ----- | ----- | ----- | 1       |
| ARF5_AT1G19850                              | ----- | ----- | ----- | 50      |
| Selmo1_437944_estExt_fgenes2_pg.C_10526     | ----- | ----- | ----- | 32      |
| all_Phypa_77324                             | ----- | ----- | ----- | GAT 290 |
| all_Phypa_159688                            | ----- | ----- | ----- | GST 152 |
| all_Phypa_225990                            | ----- | ----- | ----- | 3       |
| all_Phypa_171197                            | ----- | ----- | ----- | 395     |
| Pt179921_gw1.I.8521.1                       | ----- | ----- | ----- | 2       |
| Pt245007gw1.XIV.1750.1                      | ----- | ----- | ----- | 2       |
| ARF9_AT4G23980                              | ----- | ----- | ----- | 8       |
| ARF11_AT2G46530                             | ----- | ----- | ----- | 17      |
| ARF18_AT3G61830                             | ----- | ----- | ----- | 21      |
| ARF1_AT1G59750                              | ----- | ----- | ----- | 17      |
| ZmGRMZM2G017187_P02                         | ----- | ----- | ----- | 21      |
| ARF2_AT5G62000                              | ----- | ----- | ----- | 53      |
| ZmGRMZM2G006042_P01                         | ----- | ----- | ----- | 26      |
| Pt179307_gw1.I.7907.1                       | ----- | ----- | ----- | -       |
| ARF21_AT1G34410                             | ----- | ----- | ----- | 19      |
| ARF20_AT1G35240                             | ----- | ----- | ----- | 19      |
| ARF22_AT1G34390                             | ----- | ----- | ----- | 19      |
| ARF12_AT1G34310                             | ----- | ----- | ----- | 19      |
| ARF15_AT1G35520                             | ----- | ----- | ----- | 19      |
| ARF14_AT1G35540                             | ----- | ----- | ----- | 19      |
| ARF13_AT1G34170                             | ----- | ----- | ----- | 17      |
| ARF4_AT5G60450                              | ----- | ----- | ----- | 57      |
| ARF3_AT2G33860                              | ----- | ----- | ----- | 50      |
| Pt243681_gw1.XIV.424.1                      | ----- | ----- | ----- | -       |
| Selmo1_2_61688                              | ----- | ----- | ----- | 3       |
| Selmo1_2_51695                              | ----- | ----- | ----- | 6       |
| Phypa_108888                                | ----- | ----- | ----- | 11      |
| ARF10_AT2G28350                             | ----- | ----- | ----- | 6       |
| ARF16_AT4G30080                             | ----- | ----- | ----- | 15      |
| Phypa_61245                                 | ----- | ----- | ----- | 14      |
| ZmGRMZM2G005284_P01                         | ----- | ----- | ----- | 32      |
| ARF17_AT1G77850                             | ----- | ----- | ----- | 15      |
| Phypa_170581                                | ----- | ----- | ----- | 199     |
| all_Phypa_171888                            | ----- | ----- | ----- | 284     |
| Selmo1_2_405821                             | ----- | ----- | ----- | 4       |
| Selmo1_2_431298                             | ----- | ----- | ----- | 4       |
| Selmo1_2_431277                             | ----- | ----- | ----- | 1       |
| corb_UMD_Coleochaete_c9703_c_s_1            | ----- | ----- | ----- | 1       |
| spra_Contig219_1                            | ----- | ----- | ----- | -       |
| IAA12_AT1G04550                             | ----- | ----- | ----- | 27      |
| Consensus                                   | ----- | ----- | ----- | -       |
| Conservation                                | ----- | ----- | ----- | -       |

640 660

Phypha1\_1\_168019\_estExt\_fgenes1\_pg.C\_1630077 --- PTSELW HACAGPLV -- SLPPVGSRVV 97  
 Phypha\_218828 --- --- --- --- --- 1  
 Phypha1\_1\_127416\_e\_gw1.65.212.1 --- LNSELW HACAGPLV -- SLPPVGSRVV 31  
 Phypha1\_1\_50215\_gw1.6.284.1 --- LNSELW HACAGSLV -- SLPPVGSRVV 27  
 Phypha\_167026 --- LNSELW HACAGPLV -- SLPPVGSRVV 167  
 Phypha1\_1\_136986\_e\_gw1.133.91.1 --- LNSELW HACAGPLV -- SLPPVGSRVV 29  
 Phypha\_188433 --- LNSELW HACAGPLV -- SLPPVGSQVV 58  
 Phypha\_165321 --- LNSELW HACAGPLV -- SLPPVGSQVV 47  
 ARF8\_AT5G37020 --- LNSELW HACAGPLV -- SLPSVGSRVV 42  
 Pt198791\_gw1.IV.3880.1 --- LNSELW HACAGPLV -- SLPTAGSRVV 28  
 ARF6\_AT1G30330 --- LNSELW HACAGPLV -- SLPPVGSRVV 43  
 Pt205407\_gw1.V.808.1 --- LNSELW HACAGPLV -- SLPHVGSRVV 28  
 Selmo1\_117217\_e\_gw1.55.235.1 --- PNPELW HACAGPLV -- SLPSVGTTRVV 47  
 Selmo1\_422125 --- PNPELW HACAGPLV -- SLPSVGTTRVV 31  
 Selmo1\_424114\_fgenes2\_pg.C\_scaffold\_6500063 --- INQALW LECAGPLI -- TLPAVGSQVV 36  
 Selmo1\_446535 --- INQALW LECAGPLI -- TLPAVGSQVV 36  
 Selmo1\_181406\_estExt\_Genewise1Plus.C\_650169 --- MNTALW LECAGPLV -- TLPTVGSQVV 35  
 ARF19\_AT1G19220 --- INSQVW HACAGPLV -- SLPPVGSQVV 43  
 ARF7\_AT5G20730 --- LNSELW HACAGPLI -- SLPPVAGSLVV 44  
 ZmGRMZM2G014864\_P01 --- --- --- --- --- 1  
 ARF5\_AT1G19850 --- LNSELW HACAGPLV -- CLPQVGSQVV 74  
 Selmo1\_437944\_estExt\_fgenes2\_pg.C\_10526 --- LDSEVW HACAGPLV -- CLPRVGDTRVV 56  
 all\_Phypha\_77324 KMDELNCELW HACAGPLT -- QLPPVDSLVM 318  
 all\_Phypha\_159688 KMDELDCELW HACAGPLT -- QLPPVDSHYM 180  
 all\_Phypha\_225990 --- LDYELW HACAGPLT -- SVPPVDSLVM 27  
 all\_Phypha\_171197 KTDLDYELW HACAGPLT -- SLPPVDSLVI 423  
 Pt179921\_gw1.I.8521.1 --- LYTELW KACAGPLV -- DVPKRGERVV 26  
 Pt245007gw1.XIV.1750.1 --- LYSELW KACAGPLV -- DVPKAGERVV 26  
 ARF9\_AT4G23980 --- LYDELW KLCAGPLV -- DVPQAQERVV 32  
 ARF11\_AT2G46530 --- LYTELW KACAGPLV -- EVPRVGERVV 41  
 ARF18\_AT3G61830 --- LYTELW KVCAGPLV -- EVPRAGERVV 45  
 ARF1\_AT1G59750 --- ALCRELW HACAGPLV -- TLPRGERVV 42  
 ZmGRMZM2G017187\_P02 --- ALYQELW HACAGPLV -- TVPRQGERVV 46  
 ARF2\_AT5G62000 PEAAALYRELW HACAGPLV -- TVPRQDRVV 81  
 ZmGRMZM2G006042\_P01 --- ALFVELW KACAGPLS -- SVPLVGEKVV 51  
 Pt179307\_gw1.I.7907.1 EDALYKELW HACAGPLV -- TVPRQGERVV 27  
 ARF21\_AT1G34410 SKSYMIEQLW KLCAGPLC -- DIPKIGENVV 47  
 ARF20\_AT1G35240 SKSYMIEQLW KLCAGPLC -- DIPKIGENVV 47  
 ARF22\_AT1G34390 SKSYMIEQLW KLCAGPLC -- DIPKIGENVV 47  
 ARF12\_AT1G34310 SKSYVIEQLW KLCAGPLC -- DIPKIGENVV 47  
 ARF15\_AT1G35520 SKSYMIEQLW KLCAGPLC -- DIPKIGENVV 47  
 ARF14\_AT1G35540 SKSYMIEQLW KLCAGPLC -- DIPKIGENVV 47  
 ARF13\_AT1G34170 TKTYMYEKLV NLCAGPLC -- VLPKPGKVV 45  
 ARF4\_AT5G60450 SASSIYSELW HACAGPLT -- CLPKK-NVYV 84  
 ARF3\_AT2G33860 --- VCLELW HACAGPLI -- SLPKRGSQVV 74  
 Pt243681\_gw1.XIV.424.1 --- LYTELW YACAGPLV -- YVPRVGDKVV 24  
 Selmo1\_2\_61688 LDSQLW HACAGGMV -- QLPPVGAQVVI 27  
 Selmo1\_2\_51695 LDQQLW QACAGSMV -- QLPTVGSKVI 30  
 Phypha\_108888 LDAQLW HACAGGMV -- QLPQVGAQVVI 35  
 ARF10\_AT2G28350 LDPQLW HACAGSMV -- QIPSLNSTVV 30  
 ARF16\_AT4G30080 LDPQLW HACAGGMV -- RMPPMNSKVV 39  
 Phypha\_61245 MDERY - - - - -SNYK - RAREHPSENQ 33  
 ZmGRMZM2G005284\_P01 --- VHPQLW YACAGPTC -- TVPPVGTAVV 56  
 ARF17\_AT1G77850 --- VDPITW RACAGASV -- QIPVLSHSRVV 39  
 Phypha\_170581 DVCSLGDNSY QP-HSPLS -- LPPPPYIRTV 225  
 all\_Phypha\_171888 DTSSLGDPNC QPPQSPLP -- VPPPPYIRTV 311  
 Selmo1\_2\_405821 SFRGLEFLSR SRLA - - - - -NSAMGRAAK 27  
 Selmo1\_2\_431298 IMRGTSRQAG DRASLQLQ -- LSPVKGSRAP 32  
 Selmo1\_2\_431277 --- FW N - - - - -LQ - - - - -NLF 11  
 corb\_UMD\_Coleochaete\_c9703\_c\_s\_1 --- --- --- --- --- --- 1  
 spra\_Contig219\_1 --- YRHLM PSAAGRSG -- GAGGGGS - - - 20  
 IAA12\_AT1G04550 --- LGGGAW KERGRILTAK DFPVGSK - - - 51

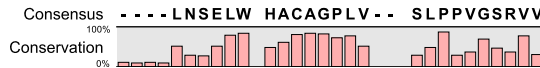

|                                              |             |            |           |     |
|----------------------------------------------|-------------|------------|-----------|-----|
| Phypha1_1_168019_estExt_fgenes1_pg.C_1630077 | YFPQGHTEQV  | -AAS-      | 110       |     |
| Phypha_218828                                | ----        | ----       | 1         |     |
| Phypha1_1_127416_e_gw1.65.212.1              | YFPQGHTEQV  | VAAS-      | 45        |     |
| Phypha1_1_50215_gw1.6.284.1                  | YFPQGHTEQV  | -AAS-      | 40        |     |
| Phypha_167026                                | YFPQGHTEQV  | -AAS-      | 180       |     |
| Phypha1_1_136986_e_gw1.133.91.1              | YFPQGHTEQV  | -AAS-      | 42        |     |
| Phypha_188433                                | YFPQGHSEQV  | -AVS-      | 71        |     |
| Phypha_165321                                | YFPQGHSEQV  | -AVS-      | 60        |     |
| ARF8_AT5G37020                               | YFPQGHSEQV  | -AAT-      | 55        |     |
| Pt198791_gw1.IV.3880.1                       | YFPQGHSEQV  | -AAT-      | 41        |     |
| ARF6_AT1G30330                               | YFPQGHSEQV  | -AAS-      | 56        |     |
| Pt205407_gw1.V.808.1                         | YFPQGHSEQV  | -AAS-      | 41        |     |
| Selmo1_117217_e_gw1.55.235.1                 | YFPQGHSEQV  | -AAS-      | 60        |     |
| Selmo1_422125                                | YFPQGHSEQV  | -AAS-      | 44        |     |
| Selmo1_424114_fgenes2_pg.C_scaffold_65000063 | YFPQGHSEQV  | IAST-      | 50        |     |
| Selmo1_446535                                | YFPQGHSEQV  | IAST-      | 50        |     |
| Selmo1_181406_estExt_Genewise1Plus.C_650169  | YFPQGHSEQV  | VAST-      | 49        |     |
| ARF19_AT1G19220                              | YFPQGHSEQV  | AASM-      | 57        |     |
| ARF7_AT5G20730                               | YFPQGHSEQV  | AASM-      | 58        |     |
| ZmGRMZM2G014864_P01                          | ----        | ----       | 1         |     |
| ARF5_AT1G19850                               | YFSQGH-EQV  | AVST-      | 87        |     |
| Selmo1_437944_estExt_fgenes2_pg.C_10526      | YFPQGHTEQV  | AAST-      | 70        |     |
| all_Phypha_77324                             | YWPQGHTEQG  | LASSGILDT  | SFVGGGIRN | 348 |
| all_Phypha_159688                            | YWPQGHTEQV  | VACTP-     | 195       |     |
| all_Phypha_225990                            | YWPQGHTEQV  | -C-        | 38        |     |
| all_Phypha_171197                            | YWPQGHTEQV  | IACTP-     | 438       |     |
| Pt179921_gw1.I.8521.1                        | YFPQGHMEQL  | EAS-       | 39        |     |
| Pt245007gw1.XIV.1750.1                       | YFPQGHMEQL  | EAS-       | 39        |     |
| ARF9_AT4G23980                               | YFPQGHMEQL  | EAS-       | 45        |     |
| ARF11_AT2G46530                              | YFPQGHMEQL  | VAS-       | 54        |     |
| ARF18_AT3G61830                              | YFPQGHMEQL  | VAS-       | 58        |     |
| ARF1_AT1G59750                               | YFPEGHMEQL  | EAS-       | 55        |     |
| ZmGRMZM2G017187_P02                          | YFPQGHMEQL  | EAS-       | 59        |     |
| ARF2_AT5G62000                               | -FPQGHTEQV  | EAS-       | 93        |     |
| ZmGRMZM2G006042_P01                          | YFPQGHTEQV  | EAS-       | 64        |     |
| Pt179307_gw1.I.7907.1                        | YFPQGHTEQV  | EAS-       | 40        |     |
| ARF21_AT1G34410                              | YFPQGNTELV  | QAST-      | 61        |     |
| ARF20_AT1G35240                              | YFPQGNTELV  | DAST-      | 61        |     |
| ARF22_AT1G34390                              | YFPQGNTELV  | EAST-      | 61        |     |
| ARF12_AT1G34310                              | YFPQGNTELV  | ETST-      | 61        |     |
| ARF15_AT1G35520                              | YFPQGNTELV  | EAST-      | 61        |     |
| ARF14_AT1G35540                              | YFPQGNTELV  | EAST-      | 61        |     |
| ARF13_AT1G34170                              | YFPQGNTELV  | ENST-      | 59        |     |
| ARF4_AT5G60450                               | YFPQGHLEQD  | AMVSY-     | 99        |     |
| ARF3_AT2G33860                               | YFPQGHLEQAP | DFSAALY-   | 91        |     |
| Pt243681_gw1.XIV.424.1                       | YFPQGHLEQV  | AAFL-      | 38        |     |
| Selmo1_2_61688                               | YFPQGHGEQA  | AAIPDFPRS- | 46        |     |
| Selmo1_2_51695                               | YFPQGHGEQA  | ASSPDFPRA  | GP        | 52  |
| Phypha_108888                                | YFPQGHGEQA  | ATPDFSASM  | GP        | 57  |
| ARF10_AT2G28350                              | YFAQGHTEHA  | HAPPDFHAPR | VP        | 52  |
| ARF16_AT4G30080                              | YFPQGHAEHA  | YDCVDFGNLP | LP        | 61  |
| Phypha_61245                                 | YAEQQTSPA   | GS-        | 45        |     |
| ZmGRMZM2G005284_P01                          | YFPQGHAEHA  | GAAADANLHA | PP        | 78  |
| ARF17_AT1G77850                              | YFPQGHVEHC  | -CP LLSTLP | SS        | 59  |
| Phypha_170581                                | --PPLHSEAD  | VHNGSPTSSS | SGP       | 246 |
| all_Phypha_171888                            | --PPLHSEAD  | VHNGSPTSSS | SGP       | 332 |
| Selmo1_2_405821                              | VLRLQAGR-   | ----       | 36        |     |
| Selmo1_2_431298                              | FCMFSTSD-   | ----       | 41        |     |
| Selmo1_2_431277                              | YFSKVH-     | ----       | 17        |     |
| corb_UMD_Coleochaete_c9703_c_s_1             | ---GHADD-   | ----       | 6         |     |
| spra_Contig219_1                             | --PSDRKRSS  | PSSS-      | 32        |     |
| IAA12_AT1G04550                              | ----        | ----       | 51        |     |

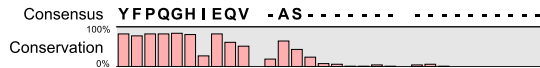

|                                              | 700      |          |        |         |            | 720        |    |
|----------------------------------------------|----------|----------|--------|---------|------------|------------|----|
| Phypha1_1_168019_estExt_fgenes1_pg.C_1630077 | TQRE     | AETHI    | PN     | YPSLPS  | RLVCLLDNVT | 137        |    |
| Phypha_218828                                | -----    | -----    | -----  | -----   | -----      | 1          |    |
| Phypha1_1_127416_e_gw1.65.212.1              | TQKE     | ADAH     | PN     | YPNLPS  | RLVCLLDNVT | 72         |    |
| Phypha1_1_50215_gw1.6.284.1                  | TQKE     | ADVP     | PN     | YPSLPS  | RLFCLDNVS  | 67         |    |
| Phypha_167026                                | TQKD     | ADAH     | PN     | YPSLPS  | KIICLLDNVT | 207        |    |
| Phypha1_1_136986_e_gw1.133.91.1              | TQKD     | ADAH     | PN     | YPSLPS  | KIICLLDNVT | 69         |    |
| Phypha_188433                                | TQKE     | ADHI     | PN     | YPNLRP  | HLICTLENT  | 98         |    |
| Phypha_165321                                | TQKE     | ADTH     | PN     | YPNLRP  | HLVCTLDNIT | 87         |    |
| ARF8_AT5G37020                               | TNKE     | VDGH     | PN     | YPSLPP  | QLICQLHNT  | 81         |    |
| Pt198791_gw1.IV.3880.1                       | TNKE     | VDAH     | PN     | YPSLPP  | QLICQLHNT  | 68         |    |
| ARF6_AT1G30330                               | TNKE     | VDAH     | PN     | YPSLHP  | QLICQLH-VT | 82         |    |
| Pt205407_gw1.V.808.1                         | TNKE     | VDAH     | PN     | YPSLPP  | QLICQLHNT  | 68         |    |
| Selmo1_117217_e_gw1.55.235.1                 | TQKE     | ADAD     | PS     | YPNLPP  | HLVCLLHNT  | 87         |    |
| Selmo1_422125                                | TQKE     | ADAD     | PS     | YPNLPP  | HLVCLLHNT  | 71         |    |
| Selmo1_424114_fgenes2_pg.C_scaffold.65000063 | HKE      | ADFEV    | PS     | YPNLPP  | QLFCLLHNT  | 76         |    |
| Selmo1_446535                                | HKE      | ADFEV    | PS     | YPNLPP  | QLFCLLHNT  | 76         |    |
| Selmo1_181406_estExt_Genewise1Plus.C_650169  | TQKDG    | VEAE     | PN     | YPSLPA  | HLICLLHNT  | 77         |    |
| ARF19_AT1G19220                              | QKQTD    | ---      | PN     | YPNLPS  | KLICLLH-ST | 81         |    |
| ARF7_AT5G20730                               | QKQTD    | ---      | PS     | YPNLPS  | KLICMLH-VT | 82         |    |
| ZmGRMZM2G014864_P01                          | -----    | -----    | -----  | -----   | -----      | 1          |    |
| ARF5_AT1G19850                               | RRS      | ATTQV    | PN     | YPNLPS  | QLMCQVHNT  | 113        |    |
| Selmo1_437944_estExt_fgenes2_pg.C_10526      | NQS      | ADMQM    | PH     | Y-NLPS  | QIYCRLLNLT | 95         |    |
| all_Phypha_77324                             | TNGAADV  | YQ       | ASKQFS | NLPA    | HLLCRISKIE | 378        |    |
| all_Phypha_159688                            | DSAGAADV | YQ       | ASKQFS | NLPA    | HLLCKISKIE | 225        |    |
| all_Phypha_225990                            | ---      | AADVRE   | ASSHFK | LPS     | HLLCKIGLE  | 63         |    |
| all_Phypha_171197                            | DSAGAADV | RE       | ASSHFK | LPS     | HLLCRIGLE  | 467        |    |
| Pt179921_gw1.I.8521.1                        | TNQ      | ELNQRV   | PLF    | ---NLPS | KILCRVHTQ  | 65         |    |
| Pt245007gw1.XIV.1750.1                       | TNQ      | ELNQQL   | PRF    | ---NLPP | KILCRVYNIQ | 65         |    |
| ARF9_AT4G23980                               | TQQVD    | LNTMK    | PLF    | ---VLPP | KILCNVMNVS | 72         |    |
| ARF11_AT2G46530                              | TNQG     | VVDQE    | PVF    | ---NLPP | KILCRVLSV  | 80         |    |
| ARF18_AT3G61830                              | TNQG     | INSEE    | PVF    | ---DLPP | KILCRLDVT  | 84         |    |
| ARF1_AT1G59750                               | MH       | QGLEQQM  | PSE    | ---NLPS | KILCKVINIR | 81         |    |
| ZmGRMZM2G017187_P02                          | AHHQQ    | LQYL     | PMF    | ---DLPP | KILC-VVNV  | 85         |    |
| ARF2_AT5G62000                               | TNQAA    | EQQ-M    | PLY    | ---DLPS | KLLCRVINVD | 119        |    |
| ZmGRMZM2G006042_P01                          | TNHL     | AHQGT    | PLY    | ---NLP  | KIPCKLMNME | 90         |    |
| Pt179307_gw1.I.7907.1                        | TNQV     | ADDQQM   | PAY    | ---NLPP | KILCRVYNIQ | 67         |    |
| ARF21_AT1G34410                              | ---      | REELNELQ | PIC    | ---DLPS | KLQCVIA-IH | 85         |    |
| ARF20_AT1G35240                              | ---      | REELNELQ | PIC    | ---DLPS | KLQCVIA-IH | 85         |    |
| ARF22_AT1G34390                              | ---      | REELNELK | PIC    | ---DLPS | KLQCVIA-IH | 85         |    |
| ARF12_AT1G34310                              | ---      | REELNELQ | PIC    | ---DLPS | KLQCVIA-IH | 85         |    |
| ARF15_AT1G35520                              | ---      | REELNELQ | PIC    | ---DLPS | KLQCVIA-IH | 85         |    |
| ARF14_AT1G35540                              | ---      | REELNELQ | PIC    | ---DFPS | KLQCVIA-IQ | 85         |    |
| ARF13_AT1G34170                              | ---      | RDELHHR  | PIF    | ---DLPS | KLRCRVA--  | 81         |    |
| ARF4_AT5G60450                               | ---      | SSPLEI   | PKF    | ---DLNP | QIVCRVYNIQ | 122        |    |
| ARF3_AT2G33860                               | ---      | -----    | ---    | GLPP    | HVFCRILDVK | 105        |    |
| Pt243681_gw1.XIV.424.1                       | ---      | NEDSKTAM | PIY    | ---DLPY | KILCKVVHVQ | 63         |    |
| Selmo1_2_61688                               | ---      | -----    | ---    | GG      | TILCRVISVD | 58         |    |
| Selmo1_2_51695                               | ---      | -----    | ---    | AG      | TVPCRVLSVK | 64         |    |
| Phypha_108888                                | ---      | -----    | ---    | SG      | TIPCRVSVN  | 69         |    |
| ARF10_AT2G28350                              | ---      | -----    | ---    | P       | LILCRVSVK  | 63         |    |
| ARF16_AT4G30080                              | ---      | -----    | ---    | P       | MVLCRVLAIK | 72         |    |
| Phypha_61245                                 | ---      | -----    | ---    | ---     | ARVY--     | 49         |    |
| ZmGRMZM2G005284_P01                          | ---      | -----    | ---    | ---     | FVCRVAGVR  | 87         |    |
| ARF17_AT1G77850                              | ---      | -----    | ---    | TS      | PVPCILTSIQ | 71         |    |
| Phypha_170581                                | ---      | -----    | ---    | YPNLP   | -----N     | 252        |    |
| all_Phypha_171888                            | ---      | -----    | ---    | YPNLP   | -----N     | 338        |    |
| Selmo1_2_405821                              | ---      | -----    | ---    | ---     | -----      | 36         |    |
| Selmo1_2_431298                              | ---      | -----    | ---    | ---     | -----      | 41         |    |
| Selmo1_2_431277                              | ---      | -----    | ---    | ---     | -----      | 17         |    |
| corb_UMD_Coleochaete_c9703_c_s_1             | ---      | -----    | ---    | ---     | -----      | 6          |    |
| spra_Contig219_1                             | ---      | ---      | ---    | ---     | LAS        | IVESSITNLR | 45 |
| IAA12_AT1G04550                              | ---      | ---      | ---    | ---     | ---        | 51         |    |

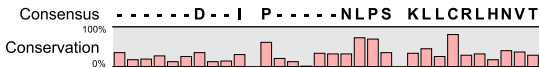

|                                              |    |           |            |             |     |
|----------------------------------------------|----|-----------|------------|-------------|-----|
| Phypa1_1_168019_estExt_fgenes1_pg.C_1630077  | LH | SDRYSMS   | LIDVVIQAD  | ETDEVYAQMT  | 167 |
| Phypa_218828                                 | -  | -         | -          | -           | 2   |
| Phypa1_1_127416_e_gw1.65.212.1               | LH | -         | ADL        | ETDEVYAQMT  | 87  |
| Phypa1_1_50215_gw1.6.284.1                   | LH | -         | ADH        | ETDEVYAQMT  | 82  |
| Phypa_167026                                 | LH | -         | ADP        | ETDEVYAQMT  | 222 |
| Phypa1_1_136986_e_gw1.133.91.1               | LH | -         | ADP        | ETDEVYAQMT  | 84  |
| Phypa_188433                                 | LH | -         | ADL        | ETDDVYAQMV  | 113 |
| Phypa_165321                                 | LH | -         | ADL        | ETDEVYAQMV  | 102 |
| ARF8_AT5G37020                               | MH | -         | ADV        | ETDEVYAQMT  | 96  |
| Pt198791_gw1.IV.3880.1                       | MH | -         | ADV        | ETDEVYA-MT  | 82  |
| ARF6_AT1G30330                               | MH | -         | ADV        | ETDEVYAQMT  | 97  |
| Pt205407_gw1.V.808.1                         | MH | -         | ADV        | ETDEVYA-MT  | 82  |
| Selmo1_117217_e_gw1.55.235.1                 | LH | -         | ADT        | ETDEVYAQMT  | 102 |
| Selmo1_422125                                | LH | -         | ADT        | ETDEVYAQMT  | 86  |
| Selmo1_424114_fgenes2_pg.C_scaffold_65000063 | LH | -         | ADQ        | ENDEVFAQMT  | 91  |
| Selmo1_446535                                | LH | -         | ADQ        | ENDEVFAQMT  | 91  |
| Selmo1_181406_estExt_Genewise1Plus.C_650169  | LH | -         | ADP        | DTDEVYAQMT  | 92  |
| ARF19_AT1G19220                              | LH | -         | ADT        | ETDEVYAQMT  | 96  |
| ARF7_AT5G20730                               | LN | -         | ADP        | ETDEVYAQMT  | 97  |
| ZmGRMZM2G014864_P01                          | -  | -         | -          | -           | 2   |
| ARF5_AT1G19850                               | LH | -         | ADK        | DSDEIYAQMS  | 128 |
| Selmo1_437944_estExt_fgenes2_pg.C_10526      | L  | -         | GADR       | ETDEVFAQMT  | 110 |
| all_Phypa_77324                              | LQ | -         | ADP        | QTDEVFAQMD  | 393 |
| all_Phypa_159688                             | LQ | -         | ADP        | HTDEVFAQMD  | 240 |
| all_Phypa_225990                             | LQ | -         | ADP        | HTDEVFAQMD  | 78  |
| all_Phypa_171197                             | LQ | -         | ADP        | NTDEVFAQMD  | 482 |
| Pt179921_gw1.I.8521.1                        | LL | -         | AEQ        | DTDEVYAQIT  | 80  |
| Pt245007gw1.XIV.1750.1                       | LL | -         | AEQ        | DTDEVYAQIT  | 80  |
| ARF9_AT4G23980                               | LQ | -         | AEK        | DTD-VYAQIT  | 86  |
| ARF11_AT2G46530                              | LK | -         | AEH        | ETDEVYAQIT  | 95  |
| ARF18_AT3G61830                              | LK | -         | AEH        | ETDEVYAQIT  | 99  |
| ARF1_AT1G59750                               | -R | -         | AEP        | ETDEVYAQIT  | 95  |
| ZmGRMZM2G017187_P02                          | LR | -         | AEA        | DSDEVYAQIM  | 100 |
| ARF2_AT5G62000                               | LK | -         | AEA        | DTDEVYAQIT  | 134 |
| ZmGRMZM2G006042_P01                          | LK | -         | AEP        | DTDEVYAQIT  | 105 |
| Pt179307_gw1.I.7907.1                        | LK | -         | AEL        | DTDEVFAQIL  | 82  |
| ARF21_AT1G34410                              | LK | -         | VEN        | NSDEIYAIEIT | 100 |
| ARF20_AT1G35240                              | LK | -         | VEN        | NSDEIYAIEIT | 100 |
| ARF22_AT1G34390                              | LK | -         | VEN        | NSDEIYAIEIT | 100 |
| ARF12_AT1G34310                              | LK | -         | VEN        | NSDEIYAIEIT | 100 |
| ARF15_AT1G35520                              | LK | -         | VEN        | NSDEIYAKIT  | 100 |
| ARF14_AT1G35540                              | LK | -         | VEN        | NSDEIYAIEIT | 100 |
| ARF13_AT1G34170                              | -  | -         | DRKVDK     | NTDEVYAQIS  | 98  |
| ARF4_AT5G60450                               | L  | -         | ANK        | DTDEVYTQIT  | 137 |
| ARF3_AT2G33860                               | LH | -         | AET        | TTDEVYAQVS  | 120 |
| Pt243681_gw1.XIV.424.1                       | LK | -         | AEA        | KTDEVFAHIT  | 78  |
| Selmo1_2_61688                               | F  | -         | LADA       | ETDEVYAKMK  | 73  |
| Selmo1_2_51695                               | F  | -         | LADK       | ETDEVFASLR  | 79  |
| Phypa_108888                                 | F  | -         | LADT       | ETDEVFARMR  | 84  |
| ARF10_AT2G28350                              | F  | -         | LADA       | ETDEVFAKIT  | 78  |
| ARF16_AT4G30080                              | Y  | -         | MADA       | ESD-VFAKLR  | 86  |
| Phypa_61245                                  | -  | -         | SDP        | LCGDSHHQF   | 62  |
| ZmGRMZM2G005284_P01                          | F  | -         | MAE        | DTDEIFVKIR  | 102 |
| ARF17_AT1G77850                              | L  | -         | LADP       | VTDE-FAHLI  | 85  |
| Phypa_170581                                 | L  | TAPPRSSQQ | CSAPIQLLPE | ESDSSYSLLM  | 282 |
| all_Phypa_171888                             | MS | GPPRTSQQ  | CNAPIQLPEL | ESDSSYSLLM  | 368 |
| Selmo1_2_405821                              | -  | -         | RHADL      | FSSDLLVS    | 50  |
| Selmo1_2_431298                              | -  | -         | GVGSTT     | LDSIFFVSKF  | 57  |
| Selmo1_2_431277                              | -  | -         | -          | -           | 17  |
| corb_UMD_Coleochaete_c9703_c_s_1             | -  | -         | -          | -           | 6   |
| spra_Contig219_1                             | TE | GCVRHPVS  | SVQLSSSSDA | IAD         | 68  |
| IAA12_AT1G04550                              | -  | -         | -          | -           | 51  |

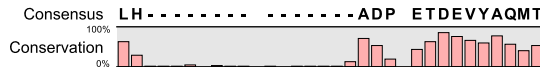



|                                              |             |             |            |     |
|----------------------------------------------|-------------|-------------|------------|-----|
| Phypa1_1_168019_estExt_fgenes1_pg.C_1630077  | DIGIR-SRQP  | TDYFCKTLTA  | SDTSTHGGFS | 212 |
| Phypa_218828                                 | DIGIR-SRQP  | TDYFCKTLTA  | SDTSTHGGFS | 47  |
| Phypa1_1_127416_e_gw1.65.212.1               | DIGMR-SRQP  | TEYFCKTLTA  | SDTSTHGGFS | 132 |
| Phypa1_1_50215_gw1.6.284.1                   | DSVIP-NKQP  | SEYFCKTLTA  | SDTSTHGGFS | 126 |
| Phypa_167026                                 | DEVV-NKQP   | TEYFCKTLTA  | SDTSTHGGFS | 266 |
| Phypa1_1_136986_e_gw1.133.91.1               | DEVV-NKQP   | TEYFCKTLTA  | SDTSTHGGFS | 128 |
| Phypa_188433                                 | DVVYQ-NKQP  | TEYFCKTLTA  | SDTSTHGGFS | 157 |
| Phypa_165321                                 | DAVVQ-NKQP  | TEYFCKTLTA  | SDTSTHGGFS | 146 |
| ARF8_AT5G37020                               | ELGIP-SKQP  | SNYFCKTLTA  | SDTSTHGGFS | 141 |
| Pt198791_gw1.IV.3880.1                       | ELGMP-SKQP  | TNYFCKTLTA  | SDTSTHGGFS | 127 |
| ARF6_AT1G30330                               | ELGVP-SRQP  | TNYFCKTLTA  | SDTSTHGGFS | 142 |
| Pt205407_gw1.V.808.1                         | ELGTA-SKQP  | TNYFCKTLTA  | SDTSTHGGFS | 128 |
| Selmo1_117217_e_gw1.55.235.1                 | DIGRQ-NRQP  | SEYFCKTLTA  | SDTSTHGGFS | 146 |
| Selmo1_422125                                | DIGRQ-NRQP  | SEYFCKTLTA  | SDTSTHGGFS | 130 |
| Selmo1_424114_fgenes2_pg.C_scaffold_65000063 | DFGIQ-TKQT  | IVSFCKTLTA  | SDTSTHGGFS | 137 |
| Selmo1_446535                                | DFGIQ-TKQT  | IVSFCKTLTA  | SDTSTHGGFS | 137 |
| Selmo1_181406_estExt_Genewise1Plus.C_650169  | DIGIQ-PKQQ  | TLSEFCKTLTA | SDTSTHGGFS | 135 |
| ARF19_AT1G19220                              | DMGLKLNKQP  | TEFFCKTLTA  | SDTSTHGGFS | 141 |
| ARF7_AT5G20730                               | DMGLKLNKQP  | NEFFCKTLTA  | SDTSTHGGFS | 142 |
| ZmGRMZM2G014864_P01                          | EALKQPRPQ   | TEFFCKTLTA  | SDTSTHGGFS | 47  |
| ARF5_AT1G19850                               | FGMLRGSKHP  | TEFFCKT-TA  | SDTSTHGGFS | 172 |
| Selmo1_437944_estExt_fgenes2_pg.C_10526      | DELSPCKRRK  | LSMFCKNLT   | SDTSTHGGFS | 155 |
| all_Phypa_77324                              | DAPSPIQQSN  | VRSFCKTLTA  | SDTSTHGGFS | 437 |
| all_Phypa_159688                             | DAPPPTMQKN  | VRSFCKTLTA  | SDTSTHGGFS | 284 |
| all_Phypa_225990                             | DATHVAKQNN  | VKMFCKTLTA  | SDTSTHGGFS | 122 |
| all_Phypa_171197                             | EAPSAIKQSS  | VKMFCKTLTA  | SDTSTHGGFS | 526 |
| Pt179921_gw1.I.8521.1                        | SSSSSEPPRP  | VHSFCKVLT   | SDTSTHGGFS | 123 |
| Pt245007gw1.XIV.1750.1                       | PCPPEPAKQT  | VHSFCKVLT   | SDTSTHGGFS | 123 |
| ARF9_AT4G23980                               | PSPPELQRPK  | VHSFCKVLT   | SDTSTHGGFS | 131 |
| ARF11_AT2G46530                              | PPLVEPAKPT  | VDSFVKILT   | SDTSTHGGFS | 139 |
| ARF18_AT3G61830                              | PPLVGPTKQE  | FHSFVKILT   | SDTSTHGGFS | 143 |
| ARF1_AT1G59750                               | APVQEPKCT   | VHSFCKTLTA  | SDTSTHGGFS | 139 |
| ZmGRMZM2G017187_P02                          | AEPQEREKCT  | AHSFCKTLTA  | SDTSTHGGFS | 144 |
| ARF2_AT5G62000                               | PPPPRFQV--  | SFCKTLTA    | SDTSTHGGFS | 178 |
| ZmGRMZM2G006042_P01                          | VPATSEGLR   | IHSFCKTLTA  | SDTSTHGG-S | 161 |
| Pt179307_gw1.I.7907.1                        | --PPPPARPR  | VHSFCKMLTA  | SDTSTHGGFS | 126 |
| ARF21_AT1G34410                              | -----RPL    | VNSFTKVLTA  | SDTSAVGGFS | 141 |
| ARF20_AT1G35240                              | -----RPL    | VNSFTKVLTA  | SDTSAVGGFF | 141 |
| ARF22_AT1G34390                              | -----RPL    | VNSFTKVLTA  | SDTS--GGFF | 139 |
| ARF12_AT1G34310                              | -----RPL    | VNSFTKVLTA  | SDTSAHGGFF | 141 |
| ARF15_AT1G35520                              | -----RPL    | VNSFTKVLTA  | SDISANGVFS | 146 |
| ARF14_AT1G35540                              | -----RPL    | VNSFTKVLTA  | SDTSAHGGFS | 141 |
| ARF13_AT1G34170                              | ---MDTRRPI  | VYFFSKILT   | SDVLSGGLLI | 139 |
| ARF4_AT5G60450                               | RNGSSSVKRTI | PHMFCKTLTA  | SDTSTHGGFS | 191 |
| ARF3_AT2G33860                               | DYEVLRKSN   | PHMFCK-LTA  | SDTSTHGGFS | 173 |
| Pt243681_gw1.XIV.424.1                       | ESLLHRKTR   | VLSFTKCLTP  | SDTSTQGGFS | 123 |
| Selmo1_2_61688                               | LVSSPTVVEK  | PASFAKTLTQ  | SDANNGGGFS | 123 |
| Selmo1_2_51695                               | AALSPSP-EK  | PASFAKTLTQ  | SDANNGGGFS | 122 |
| Phypa_108888                                 | APSSPPP-EK  | PASFAKTLTQ  | SDANNGGGFS | 128 |
| ARF10_AT2G28350                              | SDGNNGKKEK  | PASFAKTLTQ  | SDANNGGGFS | 130 |
| ARF16_AT4G30080                              | SNGFESNSEK  | TPSFAKTLTQ  | SDANNGGGFS | 135 |
| Phypa_61245                                  | -----SE---  | LSS         | GQAHNGG--- | 74  |
| ZmGRMZM2G005284_P01                          | EAGQRQPTRP  | VISSAKTLTK  | SDSYSGGSL  | 153 |
| ARF17_AT1G77850                              | FDGDVDDNKK  | VITFAKILTP  | SDANNGGGFS | 134 |
| Phypa_170581                                 | NLLAQSKAKS  | VQNGPLQTQQ  | SLQSSLSGMS | 317 |
| all_Phypa_171888                             | NLLPHSKAKN  | VQNGLLQTQQ  | SLQSSPSGMS | 403 |
| Selmo1_2_405821                              | -----T      | GSVRYMGTI-  | 60         |     |
| Selmo1_2_431298                              | -----ENPT   | FPDFVHTFNV  | GPTRVTRL-  | 81  |
| Selmo1_2_431277                              | -----       | -----       | -----      | 17  |
| corb_UMD_Coleochaete_c9703_c_s_1             | -----       | -----RNFDA  | AGAAVLLGG- | 19  |
| spra_Contig219_1                             | -----       | -----SLSP   | HPLPPHAGAS | 82  |
| IAA12_AT1G04550                              | -----       | -----RS     | AESSHQGAS  | 63  |

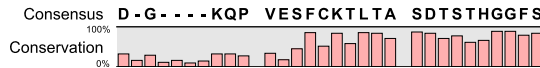

|                                              | 820        |             | 840         |     |
|----------------------------------------------|------------|-------------|-------------|-----|
| Phypha1_1_168019_estExt_fgenes1_pg.C_1630077 | VPRRAAEKVF | PPLDYSQTTP  | AQELKARDLH  | 242 |
| Phypha_218828                                | VPRRAAEKVF | PPLDYSQTTP  | AQELKARDLH  | 77  |
| Phypha1_1_127416_e_gw1.65.212.1              | VPRRAAEKVF | PPLDYTQTTP  | AQELKARDLH  | 162 |
| Phypha1_1_50215_gw1.6.284.1                  | VPRRAAEKVF | PPLDFTKSP   | AQELVARDLH  | 156 |
| Phypha_167026                                | VPRRAAEKVF | PPLDFTRVPP  | AQELVARDLH  | 296 |
| Phypha1_1_136986_e_gw1.133.91.1              | VPRRAAEKVF | PPLDFTRVPP  | AQELVARDLH  | 158 |
| Phypha_188433                                | VPRRAAEKVF | PTLDYTTQQPP | AQELVARDLH  | 187 |
| Phypha_165321                                | VPRRAAEKVF | PTLDYNTQQPP | AQELVARDLH  | 176 |
| ARF8_AT5G37020                               | VPRRAAEKVF | PPLDYTLQP - | AQELVARDLH  | 170 |
| Pt198791_gw1.IV.3880.1                       | VPRRAAEKVF | PPLDFTQQPP  | AQELVARDLH  | 157 |
| ARF6_AT1G30330                               | VPRRAAEKVF | PPLDYSQQP - | AQELMARDLH  | 171 |
| Pt205407_gw1.V.808.1                         | VPRRAAEKVF | PTLDYSQTTP  | AQELVARDLH  | 158 |
| Selmo1_117217_e_gw1.55.235.1                 | VPRRAAEKVF | PPLDFSQQPP  | AQELVARDLH  | 176 |
| Selmo1_422125                                | VPRRAAEKVF | PPLDFSQQPP  | AQELVARDLH  | 160 |
| Selmo1_424114_fgenes2_pg.C_scaffold_6500063  | VPRRAAEKVF | PPLDFTKTPP  | AQELVARDLH  | 167 |
| Selmo1_446535                                | VPRRAAEKVF | PPLDFTKTPP  | AQELVARDLH  | 167 |
| Selmo1_181406_estExt_Genewise1Plus.C_650169  | VPRRAAEKVF | PPLDFTKQP   | AQELVAKDLH  | 165 |
| ARF19_AT1G19220                              | VPRRAAEKIF | PPLDFSMQP - | AQELVAKDLH  | 170 |
| ARF7_AT5G20730                               | VPRRAAEKIF | PALDFSMQP - | CQELVAKDLH  | 171 |
| ZmGRMZM2G014864_P01                          | VPRRAAEKIF | PPLDFSMQPP  | AQELVARDLH  | 77  |
| ARF5_AT1G19850                               | VPRRAAEKLF | PPLDYSAQPP  | TQELVARDLH  | 202 |
| Selmo1_437944_estExt_fgenes2_pg.C_10526      | VPRRAAEKCL | PPLDYQSSPP  | AQELVAKDLH  | 185 |
| all_Phypha_77324                             | VPRRAAEKCL | PPLDHNMP    | CQELVAKDLH  | 467 |
| all_Phypha_159688                            | VPRRAAEKCL | PPLDHSMNPP  | CQELVAKDLH  | 314 |
| all_Phypha_225990                            | VPRRAAEKCL | PSLDYTNPP   | CQELVAKDLH  | 152 |
| all_Phypha_171197                            | VPRRAAEKCL | PPLDYNMNP   | CQELVAKDLH  | 556 |
| Pt179921_gw1.I.8521.1                        | VLRKHATECL | PPLDMTQPT   | TQELVAKDLH  | 153 |
| Pt245007gw1.XIV.1750.1                       | VLRKHATECL | PPLDMSQATP  | TQELVARDLH  | 153 |
| ARF9_AT4G23980                               | VLRKHATECL | PPLDMTQPT   | TQELVARDLH  | 160 |
| ARF11_AT2G46530                              | VLRKHATECL | PSLDMTQPT   | T-ELVARDLH  | 168 |
| ARF18_AT3G61830                              | VLRKHATECL | PSLDMTQ-T   | TQELVTRDLH  | 172 |
| ARF1_AT1G59750                               | VLRRHADDC  | PPLDMSQPP   | -WELVATDLH  | 168 |
| ZmGRMZM2G017187_P02                          | VLRRAHEEC  | PQLDMSNPP   | -QELVAKDLH  | 173 |
| ARF2_AT5G62000                               | VLRRAHEEC  | PPLDMSRQP   | TQELVAKDLH  | 208 |
| ZmGRMZM2G006042_P01                          | VLRRAHEEC  | PPLDMSQHPP  | NQELVAKDLH  | 191 |
| Pt179307_gw1.I.7907.1                        | VLRRAHEEC  | PPLDMSLQPP  | AQELVAKDLH  | 156 |
| ARF21_AT1G34410                              | VPKKHAIECL | PPLDMSQPLA  | -QELVARDLH  | 170 |
| ARF20_AT1G35240                              | VPKKHAIECL | PPLDMSQPL   | -AQELVARDLH | 166 |
| ARF22_AT1G34390                              | VPKKHAIECL | PPLDMSQPL   | -TELVARDLH  | 168 |
| ARF12_AT1G34310                              | VPKKHAIECL | PSLDMSQPLA  | -QELVARDLH  | 170 |
| ARF15_AT1G35520                              | VPKKHAIECL | PPLDMSQPL   | AQELVARDLH  | 175 |
| ARF14_AT1G35540                              | VPKKHAIECL | PPLDMSQPL   | -QELVARDLH  | 170 |
| ARF13_AT1G34170                              | VPKQYAECL  | PPLDMSQ-PI  | STNLVAKDLH  | 168 |
| ARF4_AT5G60450                               | VPRRAAEDCF | APLDYKQRP   | SQELVAKDLH  | 221 |
| ARF3_AT2G33860                               | VPRRAAEDCF | PPLDYSQRP   | SQELVARDLH  | 203 |
| Pt243681_gw1.XIV.424.1                       | VPKRHAEECL | PPLDKSQPP   | AQELVAKDLH  | 153 |
| Selmo1_2_61688                               | VPRYCAETIF | PRLDYSIDPP  | VQTVLAKDVH  | 153 |
| Selmo1_2_51695                               | VPRYCAETIF | PRLDYSVDPP  | VQTVLAKDVH  | 152 |
| Phypha_108888                                | VPRYCAETIF | PPLDYSSDPP  | VQTVLAKDVH  | 158 |
| ARF10_AT2G28350                              | VPRYCAETIF | PRLDYSAEPP  | VQTVLAKDVH  | 160 |
| ARF16_AT4G30080                              | VPRYCAETIF | PRLDYNAEPP  | VQTVLAKDVH  | 164 |
| Phypha_61245                                 | -----      | -----QQQ    | QQQQSSQMS   | 87  |
| ZmGRMZM2G005284_P01                          | VRRTCAE-IF | PKLDKSIKRP  | QQLVSARDVH  | 182 |
| ARF17_AT1G77850                              | VPRFCADSVF | PLLNFDIDPP  | VQKLYV-DIH  | 163 |
| Phypha_170581                                | TQQLRGHS-- | PQSGMAQQVD  | GVSGLHSTGH  | 345 |
| all_Phypha_171888                            | AQQLRGHS-- | PQSRMAQQAD  | RSSTMHPTGH  | 431 |
| Selmo1_2_405821                              | --TGIGDID- | PA-----RWP  | GSK-----    | 75  |
| Selmo1_2_431298                              | --KGSNKS-  | PASSQTLRWD  | AQQ-----    | 102 |
| Selmo1_2_431277                              | -----      | -----       | -----       | 17  |
| corb_UMD_Coleochaete_c9703_c_s_1             | -----      | PGLLISPVGG  | A-----      | 30  |
| spra_Contig219_1                             | FPKYAW---- | -PIPLSS--A  | CQTYTAS--   | 102 |
| IAA12_AT1G04550                              | VPRSSQVVGW | PPIG-----   | -----LH     | 79  |
| Consensus                                    | VPRRAAEKCF | PPLDYSQQPP  | AQELVARDLH  |     |

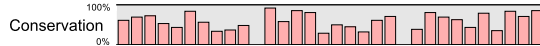



|                                             |                                                               |                                                             |                                               |
|---------------------------------------------|---------------------------------------------------------------|-------------------------------------------------------------|-----------------------------------------------|
| Phypa1_1_168019_estExt_fgenes1_pg.C_1630077 | <b>DQ</b> EW <b>HFRH</b> I <b>Y</b>                           | <b>RG</b> -----                                             | 254                                           |
| Phypa_218828                                | <b>DQ</b> EW <b>HFRH</b> I <b>Y</b>                           | <b>RG</b> -----                                             | 89                                            |
| Phypa1_1_127416_e_gw1.65.212.1              | <b>DQ</b> EW <b>HFRH</b> I <b>Y</b>                           | <b>RG</b> -----                                             | 174                                           |
| Phypa1_1_50215_gw1.6.284.1                  | <b>DQ</b> D <b>WHFRH</b> I <b>Y</b>                           | <b>RG</b> -----                                             | 168                                           |
| Phypa_167026                                | <b>DQ</b> EW <b>HFRH</b> I <b>Y</b>                           | <b>RG</b> <b>E</b> <b>TTTFLVH</b> <b>NYAYV</b> <b>IPPRG</b> | 326                                           |
| Phypa1_1_136986_e_gw1.133.91.1              | <b>DQ</b> EW <b>HFRH</b> I <b>Y</b>                           | <b>RG</b> -----                                             | 170                                           |
| Phypa_188433                                | <b>DQ</b> D <b>WHFRH</b> I <b>Y</b>                           | <b>RG</b> -----                                             | 199                                           |
| Phypa_165321                                | <b>DQ</b> D <b>WHFRH</b> I <b>Y</b>                           | <b>RG</b> -----                                             | 188                                           |
| ARF8_AT5G37020                              | <b>DV</b> EW <b>KFRH</b> I <b>F</b>                           | <b>RG</b> -----                                             | 182                                           |
| Pt198791_gw1.IV.3880.1                      | <b>DVE</b> - <b>KFRH</b> I <b>F</b>                           | <b>RG</b> -----                                             | 168                                           |
| ARF6_AT1G30330                              | <b>DN</b> EW <b>KFRH</b> I <b>F</b>                           | <b>RG</b> -----                                             | 183                                           |
| Pt205407_gw1.V.808.1                        | <b>DN</b> - <b>WKFRH</b> I <b>F</b>                           | <b>RG</b> -----                                             | 169                                           |
| Selmo1_117217_e_gw1.55.235.1                | <b>DT</b> EW <b>RFRH</b> I <b>Y</b>                           | <b>RG</b> -----                                             | 188                                           |
| Selmo1_422125                               | <b>DT</b> EW <b>RFRH</b> I <b>Y</b>                           | <b>RG</b> -----                                             | 172                                           |
| Selmo1_424114_fgenes2_pg.C_scaffold_6500063 | <b>NN</b> EW <b>HFRH</b> I <b>Y</b>                           | <b>RG</b> -----                                             | 179                                           |
| Selmo1_446535                               | <b>NN</b> EW <b>HFRH</b> I <b>Y</b>                           | <b>RG</b> -----                                             | 179                                           |
| Selmo1_181406_estExt_Genewise1Plus.C_650169 | <b>NQ</b> Q <b>WTFRH</b> I <b>Y</b>                           | <b>RG</b> -----                                             | 177                                           |
| ARF19_AT1G19220                             | <b>DT</b> T <b>WTFRH</b> I <b>Y</b>                           | <b>RG</b> -----                                             | 182                                           |
| ARF7_AT5G20730                              | <b>DN</b> T <b>WTFRH</b> I <b>Y</b>                           | <b>RG</b> -----                                             | 183                                           |
| ZmGRMZM2G014864_P01                         | <b>DN</b> <b>W</b> - <b>TFRH</b> I <b>Y</b>                   | <b>RG</b> -----                                             | 88                                            |
| ARF5_AT1G19850                              | <b>EN</b> T <b>WTFRH</b> I <b>Y</b>                           | <b>RG</b> -----                                             | 214                                           |
| Selmo1_437944_estExt_fgenes2_pg.C_10526     | <b>GV</b> EW <b>KFRH</b> I <b>Y</b>                           | <b>RG</b> -----                                             | 197                                           |
| all_Phypa_77324                             | <b>GK</b> D <b>WSFRH</b> I <b>Y</b>                           | <b>RG</b> -----                                             | 479                                           |
| all_Phypa_159688                            | <b>GK</b> EW <b>NFRH</b> I <b>Y</b>                           | <b>RG</b> -----                                             | 326                                           |
| all_Phypa_225990                            | <b>GH</b> EW <b>KFRH</b> I <b>Y</b>                           | <b>RG</b> -----                                             | 164                                           |
| all_Phypa_171197                            | <b>GQ</b> EW <b>KFRH</b> I <b>Y</b>                           | <b>RG</b> -----                                             | 568                                           |
| Pt179921_gw1.I.8521.1                       | <b>GY</b> EW <b>RFK</b> - <b>IF</b>                           | <b>RG</b> -----                                             | 164                                           |
| Pt245007gw1.XIV.1750.1                      | <b>GY</b> EW <b>RFK</b> - <b>IF</b>                           | <b>RG</b> -----                                             | 164                                           |
| ARF9_AT4G23980                              | <b>GY</b> Q <b>WKF</b> K <b>HIF</b>                           | <b>RG</b> -----                                             | 172                                           |
| ARF11_AT2G46530                             | <b>GY</b> EW <b>RFKH</b> I <b>F</b>                           | <b>RG</b> -----                                             | 180                                           |
| ARF18_AT3G61830                             | <b>GF</b> EW <b>RFKH</b> I <b>F</b>                           | <b>RG</b> -----                                             | 184                                           |
| ARF1_AT1G59750                              | <b>NS</b> EW <b>HFRH</b> I <b>F</b>                           | <b>RG</b> -----                                             | 180                                           |
| ZmGRMZM2G017187_P02                         | <b>GT</b> EW <b>HFRH</b> I <b>F</b>                           | <b>RG</b> -----                                             | 185                                           |
| ARF2_AT5G62000                              | <b>AN</b> EW <b>RFRH</b> I <b>F</b>                           | <b>RG</b> -----                                             | 220                                           |
| ZmGRMZM2G006042_P01                         | <b>GV</b> EW <b>RFRH</b> I <b>F</b>                           | <b>RG</b> -----                                             | 203                                           |
| Pt179307_gw1.I.7907.1                       | <b>GN</b> EW- <b>FRH</b> I <b>F</b>                           | <b>RG</b> -----                                             | 167                                           |
| ARF21_AT1G34410                             | <b>DN</b> Q <b>WRFRH</b> N <b>Y</b>                           | <b>RG</b> T-----                                            | 183                                           |
| ARF20_AT1G35240                             | <b>GN</b> Q <b>WRFRH</b> S <b>Y</b>                           | <b>RG</b> T-----                                            | 179                                           |
| ARF22_AT1G34390                             | <b>GN</b> Q <b>WRFNH</b> N <b>Y</b>                           | <b>RG</b> T-----                                            | 181                                           |
| ARF12_AT1G34310                             | <b>GN</b> Q <b>WRFNH</b> N <b>Y</b>                           | <b>RG</b> T-----                                            | 183                                           |
| ARF15_AT1G35520                             | <b>GN</b> Q <b>WSFRH</b> S <b>Y</b>                           | <b>RG</b> T-----                                            | 188                                           |
| ARF14_AT1G35540                             | <b>GN</b> Q <b>WRFRH</b> I <b>Y</b>                           | <b>RG</b> T-----                                            | 183                                           |
| ARF13_AT1G34170                             | <b>GQ</b> EW <b>SFKH</b> V <b>F</b>                           | <b>RG</b> T-----                                            | 181                                           |
| ARF4_AT5G60450                              | <b>GV</b> EW <b>KFRH</b> I <b>Y</b>                           | <b>RG</b> -----                                             | 233                                           |
| ARF3_AT2G33860                              | <b>GV</b> EW <b>RFRH</b> I <b>Y</b>                           | <b>RG</b> -----                                             | 215                                           |
| Pt243681_gw1.XIV.424.1                      | <b>GS</b> EW <b>RFR</b> - <b>IY</b>                           | <b>RG</b> -----                                             | 164                                           |
| Selmo1_2_61688                              | <b>GE</b> L <b>WKFRH</b> I <b>Y</b>                           | <b>RG</b> T-----                                            | 166                                           |
| Selmo1_2_51695                              | <b>GE</b> V <b>WKFRH</b> I <b>Y</b>                           | <b>RG</b> T-----                                            | 165                                           |
| Phypa_108888                                | <b>GD</b> V <b>WKFRH</b> I <b>Y</b>                           | <b>RG</b> T-----                                            | 171                                           |
| ARF10_AT2G28350                             | - <b>E</b> T <b>WKFRH</b> I <b>Y</b>                          | <b>RG</b> T-----                                            | 172                                           |
| ARF16_AT4G30080                             | <b>GD</b> V <b>WKFRH</b> I <b>Y</b>                           | <b>RG</b> T-----                                            | 177                                           |
| Phypa_61245                                 | <b>GS</b> G <b>LTMG</b> L <b>MP</b>                           | <b>GGS</b> -----                                            | 100                                           |
| ZmGRMZM2G005284_P01                         | <b>GV</b> EW <b>TFRH</b> V <b>Y</b>                           | <b>RG</b> T-----                                            | 195                                           |
| ARF17_AT1G77850                             | <b>GA</b> V <b>WDFRH</b> I <b>Y</b>                           | <b>RG</b> T-----                                            | 176                                           |
| Phypa_170581                                | <b>DL</b> E <b>VE</b> I <b>SR</b> Q <b>Q</b>                  | <b>AGQAV</b> P <b>NS</b> G <b>L</b>                         | <b>QAS</b> G <b>S</b> H <b>GV</b> S <b>T</b>  |
| all_Phypa_171888                            | <b>GL</b> E <b>GE</b> M <b>PR</b> Q <b>P</b>                  | <b>ADL</b> A <b>V</b> L <b>N</b> P <b>G</b>                 | <b>QAP</b> G <b>S</b> L <b>D</b> V <b>S</b> T |
| Selmo1_2_405821                             | --- <b>W</b> R <b>F</b> ---                                   | -----                                                       | 78                                            |
| Selmo1_2_431298                             | --- <b>R</b> F <b>C</b> A <b>S</b> S <b>R</b> P <b>A</b> E--- | -----                                                       | 112                                           |
| Selmo1_2_431277                             | -----                                                         | -----                                                       | 17                                            |
| corb_UMD_Coleochaete_c9703_c_s_1            | -----                                                         | <b>RGR</b> -----                                            | 33                                            |
| spra_Contig219_1                            | -----                                                         | -----                                                       | 102                                           |
| IAA12_AT1G04550                             | -----                                                         | -----                                                       | 79                                            |

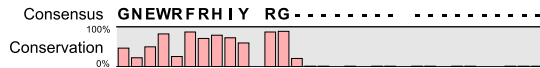

|                                              | 880                                                                                       | 900                                                                                       |                                                                                           |     |
|----------------------------------------------|-------------------------------------------------------------------------------------------|-------------------------------------------------------------------------------------------|-------------------------------------------------------------------------------------------|-----|
| Phypa1_1_168019_estExt_fgenes1_pg.C_1630077  | .....                                                                                     | .....                                                                                     | 254                                                                                       |     |
| Phypa_218828                                 | .....                                                                                     | .....                                                                                     | 89                                                                                        |     |
| Phypa1_1_127416_e_gw1.65.212.1               | .....                                                                                     | .....                                                                                     | 174                                                                                       |     |
| Phypa1_1_50215_gw1.6.284.1                   | .....                                                                                     | .....                                                                                     | 168                                                                                       |     |
| Phypa_167026                                 | <b>I</b> <b>F</b> <b>H</b> <b>R</b> <b>Y</b> <b>N</b> <b>F</b> <b>A</b> <b>I</b> <b>K</b> | <b>E</b> <b>W</b> <b>R</b> <b>G</b> <b>K</b> <b>C</b> <b>F</b> <b>L</b> <b>L</b> <b>V</b> | <b>L</b> <b>A</b> <b>T</b> <b>V</b> <b>N</b> <b>Q</b> <b>S</b> <b>H</b> <b>P</b> <b>F</b> | 356 |
| Phypa1_1_136986_e_gw1.133.91.1               | .....                                                                                     | .....                                                                                     | 170                                                                                       |     |
| Phypa_188433                                 | .....                                                                                     | .....                                                                                     | 199                                                                                       |     |
| Phypa_165321                                 | .....                                                                                     | .....                                                                                     | 188                                                                                       |     |
| ARF8_AT5G37020                               | .....                                                                                     | .....                                                                                     | 182                                                                                       |     |
| Pt198791_gw1.IV.3880.1                       | .....                                                                                     | .....                                                                                     | 168                                                                                       |     |
| ARF6_AT1G30330                               | .....                                                                                     | .....                                                                                     | 183                                                                                       |     |
| Pt205407_gw1.V.808.1                         | .....                                                                                     | .....                                                                                     | 169                                                                                       |     |
| Selmo1_117217_e_gw1.55.235.1                 | .....                                                                                     | .....                                                                                     | 188                                                                                       |     |
| Selmo1_422125                                | .....                                                                                     | .....                                                                                     | 172                                                                                       |     |
| Selmo1_424114_fgenes2_pg.C_scaffold_65000063 | .....                                                                                     | .....                                                                                     | 179                                                                                       |     |
| Selmo1_446535                                | .....                                                                                     | .....                                                                                     | 179                                                                                       |     |
| Selmo1_181406_estExt_Genewise1Plus.C_650169  | .....                                                                                     | .....                                                                                     | 177                                                                                       |     |
| ARF19_AT1G19220                              | .....                                                                                     | .....                                                                                     | 182                                                                                       |     |
| ARF7_AT5G20730                               | .....                                                                                     | .....                                                                                     | 183                                                                                       |     |
| ZmGRMZM2G014864_P01                          | .....                                                                                     | .....                                                                                     | 88                                                                                        |     |
| ARF5_AT1G19850                               | .....                                                                                     | .....                                                                                     | 214                                                                                       |     |
| Selmo1_437944_estExt_fgenes2_pg.C_10526      | .....                                                                                     | .....                                                                                     | 197                                                                                       |     |
| all_Phypa_77324                              | .....                                                                                     | .....                                                                                     | 479                                                                                       |     |
| all_Phypa_159688                             | .....                                                                                     | .....                                                                                     | 326                                                                                       |     |
| all_Phypa_225990                             | .....                                                                                     | .....                                                                                     | 164                                                                                       |     |
| all_Phypa_171197                             | .....                                                                                     | .....                                                                                     | 568                                                                                       |     |
| Pt179921_gw1.I.8521.1                        | .....                                                                                     | .....                                                                                     | 164                                                                                       |     |
| Pt245007gw1.XIV.1750.1                       | .....                                                                                     | .....                                                                                     | 164                                                                                       |     |
| ARF9_AT4G23980                               | .....                                                                                     | .....                                                                                     | 172                                                                                       |     |
| ARF11_AT2G46530                              | .....                                                                                     | .....                                                                                     | 180                                                                                       |     |
| ARF18_AT3G61830                              | .....                                                                                     | .....                                                                                     | 184                                                                                       |     |
| ARF1_AT1G59750                               | .....                                                                                     | .....                                                                                     | 180                                                                                       |     |
| ZmGRMZM2G017187_P02                          | .....                                                                                     | .....                                                                                     | 185                                                                                       |     |
| ARF2_AT5G62000                               | .....                                                                                     | .....                                                                                     | 220                                                                                       |     |
| ZmGRMZM2G006042_P01                          | .....                                                                                     | .....                                                                                     | 203                                                                                       |     |
| Pt179307_gw1.I.7907.1                        | .....                                                                                     | .....                                                                                     | 167                                                                                       |     |
| ARF21_AT1G34410                              | .....                                                                                     | .....                                                                                     | 183                                                                                       |     |
| ARF20_AT1G35240                              | .....                                                                                     | .....                                                                                     | 179                                                                                       |     |
| ARF22_AT1G34390                              | .....                                                                                     | .....                                                                                     | 181                                                                                       |     |
| ARF12_AT1G34310                              | .....                                                                                     | .....                                                                                     | 183                                                                                       |     |
| ARF15_AT1G35520                              | .....                                                                                     | .....                                                                                     | 188                                                                                       |     |
| ARF14_AT1G35540                              | .....                                                                                     | .....                                                                                     | 183                                                                                       |     |
| ARF13_AT1G34170                              | .....                                                                                     | .....                                                                                     | 181                                                                                       |     |
| ARF4_AT5G60450                               | .....                                                                                     | .....                                                                                     | 233                                                                                       |     |
| ARF3_AT2G33860                               | .....                                                                                     | .....                                                                                     | 215                                                                                       |     |
| Pt243681_gw1.XIV.424.1                       | .....                                                                                     | .....                                                                                     | 164                                                                                       |     |
| Selmo1_2_61688                               | .....                                                                                     | .....                                                                                     | 166                                                                                       |     |
| Selmo1_2_51695                               | .....                                                                                     | .....                                                                                     | 165                                                                                       |     |
| Phypa_108888                                 | .....                                                                                     | .....                                                                                     | 171                                                                                       |     |
| ARF10_AT2G28350                              | .....                                                                                     | .....                                                                                     | 172                                                                                       |     |
| ARF16_AT4G30080                              | .....                                                                                     | .....                                                                                     | 177                                                                                       |     |
| Phypa_61245                                  | .....                                                                                     | .....                                                                                     | 100                                                                                       |     |
| ZmGRMZM2G005284_P01                          | .....                                                                                     | .....                                                                                     | 195                                                                                       |     |
| ARF17_AT1G77850                              | .....                                                                                     | .....                                                                                     | 176                                                                                       |     |
| Phypa_170581                                 | <b>C</b> <b>T</b> <b>Q</b> <b>G</b> <b>S</b> <b>L</b> <b>Q</b> <b>N</b> <b>G</b> <b>N</b> | <b>V</b> <b>H</b> <b>H</b> <b>Q</b> <b>N</b> <b>G</b> <b>H</b> <b>G</b>                   | 393                                                                                       |     |
| all_Phypa_171888                             | <b>S</b> <b>N</b> <b>Q</b> <b>G</b> <b>S</b> <b>L</b> <b>Q</b> <b>N</b> <b>G</b> <b>N</b> | <b>L</b> <b>H</b> <b>N</b> <b>Q</b> <b>N</b> <b>G</b> <b>H</b> <b>G</b>                   | 479                                                                                       |     |
| Selmo1_2_405821                              | .....                                                                                     | .....                                                                                     | 78                                                                                        |     |
| Selmo1_2_431298                              | .....                                                                                     | .....                                                                                     | 112                                                                                       |     |
| Selmo1_2_431277                              | .....                                                                                     | .....                                                                                     | 17                                                                                        |     |
| corb_UMD_Coleochaete_c9703_c_s_1             | .....                                                                                     | .....                                                                                     | 33                                                                                        |     |
| spra_Contig219_1                             | .....                                                                                     | .....                                                                                     | 102                                                                                       |     |
| IAA12_AT1G04550                              | .....                                                                                     | .....                                                                                     | 79                                                                                        |     |
| Consensus                                    | .....                                                                                     | .....                                                                                     |                                                                                           |     |
| Conservation                                 | .....                                                                                     | .....                                                                                     |                                                                                           |     |

|                                              |         |     |             |         |                |     |
|----------------------------------------------|---------|-----|-------------|---------|----------------|-----|
| Phypha1_1_168019_estExt_fgenes1_pg.C_1630077 | -----   | QPR | RHLLTTG     | -W      | SVFVSAKRLQ     | 275 |
| Phypha_218828                                | -----   | QPR | RHLLTTG     | -W      | SVFVSAKRLQ     | 110 |
| Phypha1_1_127416_e_gw1.65.212.1              | -----   | QPR | RHLLTTG     | -W      | SVFVSAKRLQ     | 195 |
| Phypha1_1_50215_gw1.6.284.1                  | -----   | QPR | RHLLTTG     | -W      | SVFVSAKRLQ     | 189 |
| Phypha_167026                                | SSRLCDR | QPR | RHLLTTG     | -W      | SVFVSAKRLQ     | 384 |
| Phypha1_1_136986_e_gw1.133.91.1              | -----   | QPR | RHLLTTG     | -W      | SVFVSAKRLQ     | 191 |
| Phypha_188433                                | -----   | QPR | RHLLTTG     | -W      | SIFISAARLQ     | 220 |
| Phypha_165321                                | -----   | QPR | RHLLTTG     | -W      | SVFVSAKRLQ     | 209 |
| ARF8_AT5G37020                               | -----   | QPK | RHLLTTG     | -W      | SVFVSAKRLV     | 203 |
| Pt198791_gw1.IV.3880.1                       | -----   | QPK | RHLLTTG     | -W      | SVFVSAKRLV     | 189 |
| ARF6_AT1G30330                               | -----   | QPK | RHLLTTG     | -W      | SVFVSAKRLV     | 204 |
| Pt205407_gw1.V.808.1                         | -----   | QPK | RHLLTTG     | -W      | SVFVSAKRLV     | 190 |
| Selmo1_117217_e_gw1.55.235.1                 | -----   | QPR | RHLLTTG     | -W      | SVFVSAKRLQ     | 209 |
| Selmo1_422125                                | -----   | QPR | RHLLTTG     | -W      | SVFVSAKRLQ     | 193 |
| Selmo1_424114_fgenes2_pg.C_scaffold_6500063  | -----   | QPR | RHLLTTG     | -W      | SVFVSAKRLQ     | 200 |
| Selmo1_446535                                | -----   | QPR | RHLLTTG     | -W      | SVFVSAKRLQ     | 200 |
| Selmo1_181406_estExt_Genewise1Plus.C_650169  | -----   | QPR | RHLLTTG     | -W      | SVFVSAKRLQ     | 198 |
| ARF19_AT1G19220                              | -----   | QPK | RHLLTTG     | -W      | SVFVSTKRLV     | 203 |
| ARF7_AT5G20730                               | -----   | QPK | RHLLTTG     | -W      | SVFVSTKRLV     | 204 |
| ZmGRMZM2G014864_P01                          | -----   | QPK | RHLLTTG     | -W      | SLFVSGKRLV     | 109 |
| ARF5_AT1G19850                               | -----   | QPK | RHLLTTG     | -W      | SLFVSGKRLV     | 235 |
| Selmo1_437944_estExt_fgenes2_pg.C_10526      | -----   | QPR | RHLLTTG     | -W      | SVFVSOQKLV     | 218 |
| all_Phypha_77324                             | -----   | HPR | RHLLTTG     | -W      | SVFVSOQKLV     | 500 |
| all_Phypha_159688                            | -----   | HPR | RHLLTTG     | -W      | SVFVSOQKLV     | 347 |
| all_Phypha_225990                            | -----   | HPR | RHLLTTG     | -W      | SAFVSAKRLV     | 185 |
| all_Phypha_171197                            | -----   | VPR | RHLLTTG     | -W      | STFVSAKRLV     | 589 |
| Pt179921_gw1.I.8521.1                        | -----   | QPR | RHLLTTG     | -W      | STFVTSKRLV     | 185 |
| Pt245007gw1.XIV.1750.1                       | -----   | QPR | RHLLTTG     | -W      | STFVTSKRLV     | 185 |
| ARF9_AT4G23980                               | -----   | QPR | RHLLTTG     | -W      | STFVTSKRLV     | 193 |
| ARF11_AT2G46530                              | -----   | QPR | RHLLTTG     | -W      | STFVTSKRLV     | 201 |
| ARF18_AT3G61830                              | -----   | QPR | RHLLTTG     | -W      | STFVSSKRLV     | 205 |
| ARF1_AT1G59750                               | -----   | QPR | RHLLTTG     | -W      | SVFVSSKRLV     | 201 |
| ZmGRMZM2G017187_P02                          | -----   | QPK | RHLLTTG     | -W      | SVFVSSKRLV     | 206 |
| ARF2_AT5G62000                               | -----   | QPR | RHLLQSG     | -W      | SVFVSSKRLV     | 240 |
| ZmGRMZM2G006042_P01                          | -----   | QPR | RHLLQSG     | -W      | SVFVSAKRLV     | 224 |
| Pt179307_gw1.I.7907.1                        | -----   | QPR | RHLLQSG     | -W      | SLFVSAKRLV     | 188 |
| ARF21_AT1G34410                              | -----   | PQ  | RHS TTG     | -W      | NEFTSKKLV      | 203 |
| ARF20_AT1G35240                              | -----   | PQ  | RHS TTG     | -W      | NEFTSKKLV      | 199 |
| ARF22_AT1G34390                              | -----   | PQ  | RHLLTTG     | -W      | NAFTSKKLV      | 201 |
| ARF12_AT1G34310                              | -----   | PQ  | RHLLTTG     | -W      | NAFTSKKLV      | 203 |
| ARF15_AT1G35520                              | -----   | PQ  | RHLLTTG     | -W      | NEFTSKKLV      | 208 |
| ARF14_AT1G35540                              | -----   | AQ  | RHLLTTG     | -W      | NAFTSKKLV      | 203 |
| ARF13_AT1G34170                              | -----   | PQ  | RHMF TSGGGW | -W      | SVFATTKRLV     | 203 |
| ARF4_AT5G60450                               | -----   | QPR | RHLLT - -   | -GW     | SLFVSOQKLV     | 253 |
| ARF3_AT2G33860                               | -----   | QPR | RHLLTTG     | -W      | SAFVNKKLV      | 236 |
| Pt243681_gw1.XIV.424.1                       | -----   | QPK | RHLLTTG     | -W      | STFVSSKRLV     | 185 |
| Selmo1_2_61688                               | -----   | PR  | RHLLTTG     | -W      | STFVNQKLV      | 186 |
| Selmo1_2_51695                               | -----   | PR  | RHLLTTG     | -W      | STFVNQKLV      | 185 |
| Phypha_108888                                | -----   | PR  | RHLLTTG     | -W      | STFVNQKLV      | 191 |
| ARF10_AT2G28350                              | -----   | PR  | RHLLTTG     | -W      | STFVNQKLV      | 192 |
| ARF16_AT4G30080                              | -----   | PR  | RHLLTTG     | -W      | SNFVNQKLV      | 197 |
| Phypha_61245                                 | -----   | PT  | RD - -      | -DG - G | SNSKSKLKSS     | 117 |
| ZmGRMZM2G005284_P01                          | -----   | PE  | RNLLTTG     | -W      | SDFVNSKLV      | 215 |
| ARF17_AT1G77850                              | -----   | PR  | RHLLTTG     | -W      | SKFVNSKLV      | 196 |
| Phypha_170581                                | -----   | --- | SPGLRQ      | ---     | SGMQNGVAFQ     | 409 |
| all_Phypha_171888                            | -----   | --- | SPGLPQ      | ---     | NGMLNSVAFH     | 495 |
| Selmo1_2_405821                              | -----   | --- | PKCSW       | ---     | F - - - - -    | 84  |
| Selmo1_2_431298                              | -----   | EST | RTSSRPIC    | -W      | FPPVVS - - - - | 130 |
| Selmo1_2_431277                              | -----   | --- | ---         | ---     | ---            | 17  |
| corb_UMD_Coleochaete_c9703_c_s_1             | -----   | --- | ---         | ---     | ---            | 33  |
| spra_Contig219_1                             | -----   | --- | FSPGGTR     | ---     | SMSPTNTR - - - | 117 |
| IAA12_AT1G04550                              | -----   | --- | RNSLVN      | ---     | NQAMKAARAE     | 95  |

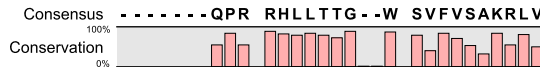

|                                              | 940            | 960               |                  |
|----------------------------------------------|----------------|-------------------|------------------|
| Phypha1_1_168019_estExt_fgenes1_pg.C_1630077 | AGDAVLFIR      | DDKQQLQLG         | RRQNRQQ - TV 303 |
| Phypha_218828                                | AGDAVLFIR      | DDKQQLQLG         | RRQNRQQ - TV 138 |
| Phypha1_1_127416_e_gw1.65.212.1              | AGDAVLFIR      | DDKQQLQLG         | RRQNRQQ - TV 223 |
| Phypha1_1_50215_gw1.6.284.1                  | AGDSVLFIR      | DDKDHLLGI         | RRANRQQ - SV 217 |
| Phypha_167026                                | AGDSVLFIR      | DDKGNLLGI         | RRANRQQ - TV 412 |
| Phypha1_1_136986_e_gw1.133.91.1              | AGDSVLFIR      | DDKGNLLGI         | RRANRQQ - TV 219 |
| Phypha_188433                                | AGDAVLFIR      | DDKQQLLGI         | RRANRQQ - TI 248 |
| Phypha_165321                                | AGDAVLFIR      | DDKQQLLGI         | RRANRQQ - TM 237 |
| ARF8_AT5G37020                               | AGDSVIFIR      | NEKNQLFLG         | RHATRPP - TI 231 |
| Pt198791_gw1.IV.3880.1                       | AGDSVLFIW      | NEKNQLLGI         | RRATRPP - TV 217 |
| ARF6_AT1G30330                               | AGDSVLFIW      | NDKNQLLGI         | RRANRPP - TV 232 |
| Pt205407_gw1.V.808.1                         | AGDSVLFIW      | NEKNQLLGI         | RRANRPP - TF 218 |
| Selmo1_117217_e_gw1.55.235.1                 | TGDAVLFIR      | DEKQQLLGI         | RRANRQQ - AS 237 |
| Selmo1_422125                                | TGDAVLFIR      | DEKQQLLGI         | RRANRQQ - AS 221 |
| Selmo1_424114_fgenes2_pg.C_scaffold.65000063 | AGDTVLFIR      | DEQGQHMLGI        | RRANRQQ - TN 228 |
| Selmo1_446535                                | AGDTVLFIR      | DEQGQHMLGI        | RRANRQQ - TN 228 |
| Selmo1_181406_estExt_Genewise1Plus.C_650169  | AGDTVLFIR      | DENHLLLGI         | RRANRQQ - AN 226 |
| ARF19_AT1G19220                              | AGDSVLFVR      | DEKSQLMLGI        | RRANRQT - PT 231 |
| ARF7_AT5G20730                               | AGDSVLFIR      | DGKAQLLGI         | RRANRQQ - PA 232 |
| ZmGRMZM2G014864_P01                          | AGDSVLFVR      | DEKQQLLGI         | RRANRQP - T 137  |
| ARF5_AT1G19850                               | AGDSV - FIR    | DEKSQLMVG         | RRANRQQ - TA 262 |
| Selmo1_437944_estExt_fgenes2_pg.C_10526      | AGDAVLFIR      | GDNGELRIG         | RRARVQQNSV 247   |
| all_Phypha_77324                             | AGDTVIFLR      | GENGQLRVG         | RRASKQPPA 529    |
| all_Phypha_159688                            | AGDTVIFLR      | GENGQLRVG         | RRASKQLPQT 376   |
| all_Phypha_225990                            | AGDTVIFLR      | GENGQLRVG         | RRASKQPPA 214    |
| all_Phypha_171197                            | AGDTVIFLR      | GENGQLRVG         | RRASKQPPA 618    |
| Pt179921_gw1.I.8521.1                        | AGDSFVFLR      | GENGELRVG         | RRVACQQ - SS 213 |
| Pt245007gw1.XIV.1750.1                       | AGDSFVFLRX     | GDNGELRVG         | RRVARQQ - CS 214 |
| ARF9_AT4G23980                               | AGDTFVFLR      | GENGELRVG         | RRANLQQ - SS 221 |
| ARF11_AT2G46530                              | AGDAFVFLR      | GETGDLRVG         | RRLAKQQ - ST 229 |
| ARF18_AT3G61830                              | AGDAFVFLR      | GENGDLRVG         | RRLARHQ - ST 233 |
| ARF1_AT1G59750                               | AGDAFIFLR      | GENEELRVG         | RRHMRQQ - TN 229 |
| ZmGRMZM2G017187_P02                          | SGDAFIFMR      | GENGELRVG         | RRLMRQQ - NS 234 |
| ARF2_AT5G62000                               | AGDAFIFLR      | GENGELRVG         | RRAMRQQ - GN 268 |
| ZmGRMZM2G006042_P01                          | AGDAFIFLR      | GENGELR - GV      | RRALRHQ - TT 251 |
| Pt179307_gw1.I.7907.1                        | AGDAFIFLR      | GETEELRVG         | RRALSQP - SN 216 |
| ARF21_AT1G34410                              | KGDVIVFVR      | GETGELRVG         | RRARHQGN - 231   |
| ARF20_AT1G35240                              | KGDVIVFVR      | GETGELRVG         | RRARHQGN - 227   |
| ARF22_AT1G34390                              | AGDVIVFVR      | GETGELRVG         | RRAGHQGN - 229   |
| ARF12_AT1G34310                              | AGDVIVFVR      | GETGELRVG         | RRARHQGN - 231   |
| ARF15_AT1G35520                              | KGDVIVFVR      | GETGELRVG         | RRARHQGN - 236   |
| ARF14_AT1G35540                              | EGDVIVFVR      | GETGELRVG         | RRAGHQGN - 231   |
| ARF13_AT1G34170                              | MGDIFVLLR      | GENGELRFG         | RRAKHQGH - 231   |
| ARF4_AT5G60450                               | SGDAVLFIR      | DEGGELRLGI        | RRARPR - NG 281  |
| ARF3_AT2G33860                               | SGDA - LFLR    | GDDGKRLGI         | RRASQIEGTA 264   |
| Pt243681_gw1.XIV.424.1                       | AGDSFIFLR      | GESGELRVG         | RRAMKLE - NN 213 |
| Selmo1_2_61688                               | AGDAIVFLR      | SASGELCVG         | RRSMRGPNG 215    |
| Selmo1_2_51695                               | AGDAIVFLR      | SNSGELCVG         | RRSMRGGSG 214    |
| Phypha_108888                                | AGDAIVFLR      | SASGELCVG         | RRSMRGAMGD 220   |
| ARF10_AT2G28350                              | AGDSIVFLR      | SESGDLCVG         | RRAKRGG LGS 221  |
| ARF16_AT4G30080                              | AGDSIVFMR      | AENGDLCVG         | RRAKRGG IGN 226  |
| Phypha_61245                                 | PAPITFLLE      | GQSLD - - - - -   | - - - - - 131    |
| ZmGRMZM2G005284_P01                          | IGDSVVFMR      | EEDGTIHIG         | RRARARRNA 244    |
| ARF17_AT1G77850                              | AGDSVVFMR      | KSADFMFIV         | RRTPSSSDG 225    |
| Phypha_170581                                | HNGHAL - - - - | SANGLHIGV         | QNTSQQPGG 434    |
| all_Phypha_171888                            | HGGRSL - - - - | PACGLQNGT         | RNGNQQPGG 520    |
| Selmo1_2_405821                              | - - - - -      | SFW - - - - I     | AKPQK - - - - 93 |
| Selmo1_2_431298                              | - - - - -      | DWELLE            | AISRLEDGLA 149   |
| Selmo1_2_431277                              | - - - - -      | - - - - -         | - - - - - 17     |
| corb_UMD_Coleochaete_c9703_c_s_1             | - - - - -      | - - - - - G       | RAA - - - - - 38 |
| spra_Contig219_1                             | SEESLMLALS     | CQSEERTDGS        | GQSRRDATSD 147   |
| IAA12_AT1G04550                              | EGD - - - - -  | - - - - - GEKKV - | - - - - - 103    |

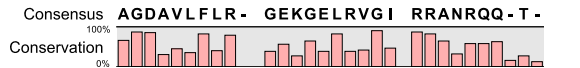

|                                              |                |               |            |          |       |
|----------------------------------------------|----------------|---------------|------------|----------|-------|
| Phypa1_1_168019_estExt_fgenes1_pg.C_1630077  | MP             | -----         | -----      | -----    | 305   |
| Phypa_218828                                 | MP             | -----         | -----      | -----    | 140   |
| Phypa1_1_127416_e_gw1.65.212.1               | MP             | -----         | -----      | -----    | 225   |
| Phypa1_1_50215_gw1.6.284.1                   | MP             | -----         | -----      | -----    | 219   |
| Phypa_167026                                 | MP             | -----         | -----      | -----    | 414   |
| Phypa1_1_136986_e_gw1.133.91.1               | MP             | -----         | -----      | -----    | 221   |
| Phypa_188433                                 | MP             | -----         | -----      | -----    | 250   |
| Phypa_165321                                 | MP             | -----         | -----      | -----    | 239   |
| ARF8_AT5G37020                               | VP             | -----         | -----      | -----    | 233   |
| Pt198791_gw1.IV.3880.1                       | MP             | -----         | -----      | -----    | 219   |
| ARF6_AT1G30330                               | MP             | -----         | -----      | -----    | 234   |
| Pt205407_gw1.V.808.1                         | MP             | -----         | -----      | -----    | 220   |
| Selmo1_117217_e_gw1.55.235.1                 | MP             | -----         | -----      | -----    | 239   |
| Selmo1_422125                                | MP             | -----         | -----      | -----    | 223   |
| Selmo1_424114_fgenes2_pg.C_scaffold_65000063 | LP             | -----         | -----      | -----    | 230   |
| Selmo1_446535                                | LP             | -----         | -----      | -----    | 230   |
| Selmo1_181406_estExt_Genewise1Plus.C_650169  | VP             | -----         | -----      | -----    | 228   |
| ARF19_AT1G19220                              | LS             | -----         | -----      | -----    | 233   |
| ARF7_AT5G20730                               | LS             | -----         | -----      | -----    | 234   |
| ZmGRMZM2G014864_P01                          | IS             | -----         | -----      | -----    | 139   |
| ARF5_AT1G19850                               | LP             | -----         | -----      | -----    | 264   |
| Selmo1_437944_estExt_fgenes2_pg.C_10526      | TS             | -----         | -----      | -----    | 249   |
| all_Phypa_77324                              | R              | -----         | -----      | -----    | 530   |
| all_Phypa_159688                             | R              | -----         | -----      | -----    | 377   |
| all_Phypa_225990                             | R              | -----         | -----      | -----    | 215   |
| all_Phypa_171197                             | H              | -----         | -----      | -----    | 619   |
| Pt179921_gw1.I.8521.1                        | MP             | -----         | -----      | -----    | 215   |
| Pt245007gw1.XIV.1750.1                       | LP             | -----         | -----      | -----    | 216   |
| ARF9_AT4G23980                               | MP             | -----         | -----      | -----    | 223   |
| ARF11_AT2G46530                              | MP             | -----         | -----      | -----    | 231   |
| ARF18_AT3G61830                              | MP             | -----         | -----      | -----    | 235   |
| ARF1_AT1G59750                               | LP             | -----         | -----      | -----    | 231   |
| ZmGRMZM2G017187_P02                          | MP             | -----         | -----      | -----    | 236   |
| ARF2_AT5G62000                               | VP             | -----         | -----      | -----    | 270   |
| ZmGRMZM2G006042_P01                          | LP             | -----         | -----      | -----    | 253   |
| Pt179307_gw1.I.7907.1                        | VP             | -----         | -----      | -----    | 218   |
| ARF21_AT1G34410                              | LP             | -----         | -----      | -----    | 233   |
| ARF20_AT1G35240                              | LP             | -----         | -----      | -----    | 229   |
| ARF22_AT1G34390                              | LP             | -----         | -----      | -----    | 231   |
| ARF12_AT1G34310                              | LP             | -----         | -----      | -----    | 233   |
| ARF15_AT1G35520                              | LP             | -----         | -----      | -----    | 238   |
| ARF14_AT1G35540                              | LP             | -----         | -----      | -----    | 233   |
| ARF13_AT1G34170                              | LP             | -----         | -----      | -----    | 233   |
| ARF4_AT5G60450                               | LP             | -----         | -----      | -----    | 283   |
| ARF3_AT2G33860                               | AL             | -----         | -----      | -----    | 266   |
| Pt243681_gw1.XIV.424.1                       | LS             | -----         | -----      | -----    | 215   |
| Selmo1_2_61688                               | DS - G I SWHSS | -----         | -----      | PGQSGYSE | 232   |
| Selmo1_2_51695                               | NADALLWHSAS    | SSRSSRWEL     | RPPMDTGLSD | -----    | 244   |
| Phypa_108888                                 | NGHG           | -----         | -----      | GSSN     | 228   |
| ARF10_AT2G28350                              | N - - AGSDNP   | Y - - PGFSGFL | RDETTTTSK  | -----    | 246   |
| ARF16_AT4G30080                              | GPEYSAGWNP     | IGSGYSSLL     | REDESNSLRR | -----    | 256   |
| Phypa_61245                                  | -----          | -----         | -----      | -----    | 131   |
| ZmGRMZM2G005284_P01                          | YGRQL          | -----         | -----      | -----    | 249   |
| ARF17_AT1G77850                              | GSSYYGGDEY     | NGYSSSVAK     | EDD        | -----    | 248   |
| Phypa_170581                                 | -----          | HLLPNQL       | PQLGGASLPP | -----    | 451   |
| all_Phypa_171888                             | -----          | QVFSSRGD      | PARAGATILH | -----    | 538   |
| Selmo1_2_405821                              | -----          | -----         | -----      | -----    | 93    |
| Selmo1_2_431298                              | L              | -----         | -----      | -----    | 150   |
| Selmo1_2_431277                              | -----          | -----         | -----      | -----    | 17    |
| corb_UMD_Coleochaete_c9703_c_s_1             | -----          | -----         | -----      | -----    | 38    |
| spra_Contig219_1                             | -----          | -----         | -----      | -----    | 147   |
| IAA12_AT1G04550                              | -----          | -----         | -----      | -----    | 103   |
| Consensus                                    | MP             | -----         | -----      | -----    | ----- |

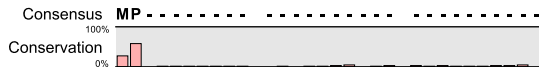

|                                             | 1,000        | 1,020      |                  |
|---------------------------------------------|--------------|------------|------------------|
| Phypa1_1_168019_estExt_fgenes1_pg.C_1630077 | -----        | -----      | SSV LSS 311      |
| Phypa_218828                                | -----        | -----      | SSV LSS 146      |
| Phypa1_1_127416_e_gw1.65.212.1              | -----        | -----      | SSV LSS 231      |
| Phypa1_1_50215_gw1.6.284.1                  | -----        | -----      | SSV LSS 225      |
| Phypa_167026                                | -----        | -----      | SSV LSS 420      |
| Phypa1_1_136986_e_gw1.133.91.1              | -----        | -----      | SSV LSS 227      |
| Phypa_188433                                | -----        | -----      | SSV LSS 256      |
| Phypa_165321                                | -----        | -----      | SSV LSS 245      |
| ARF8_AT5G37020                              | -----        | -----      | SSV LSS 239      |
| Pt198791_gw1.IV.3880.1                      | -----        | -----      | SSV LSS 225      |
| ARF6_AT1G30330                              | -----        | -----      | SSV LSS 240      |
| Pt205407_gw1.V.808.1                        | -----        | -----      | SSV LSS 226      |
| Selmo1_117217_e_gw1.55.235.1                | -----        | -----      | LSLST 245        |
| Selmo1_422125                               | -----        | -----      | LSLST 229        |
| Selmo1_424114_fgenes2_pg.C_scaffold_6500063 | -----        | -----      | TSLSS 236        |
| Selmo1_446535                               | -----        | -----      | TSLSS 236        |
| Selmo1_181406_estExt_Genewise1Plus.C_650169 | -----        | -----      | SSLSS 234        |
| ARF19_AT1G19220                             | -----        | -----      | SSV ISS 239      |
| ARF7_AT5G20730                              | -----        | -----      | SSV ISS 240      |
| ZmGRMZM2G014864_P01                         | -----        | -----      | SSV LSS 145      |
| ARF5_AT1G19850                              | -----        | -----      | SSV LSA 270      |
| Selmo1_437944_estExt_fgenes2_pg.C_10526     | -----        | -----      | SSLSS 255        |
| all_Phypa_77324                             | -----        | -----      | STHFSS 536       |
| all_Phypa_159688                            | -----        | -----      | STHFSS 383       |
| all_Phypa_225990                            | -----        | -----      | STNFSS 221       |
| all_Phypa_171197                            | -----        | -----      | STYFSS 625       |
| Pt179921_gw1.I.8521.1                       | -----        | -----      | SSV ISS 221      |
| Pt245007gw1.XIV.1750.1                      | -----        | -----      | SSV ISS 222      |
| ARF9_AT4G23980                              | -----        | -----      | SSV ISS 229      |
| ARF11_AT2G46530                             | -----        | -----      | ASV ISS 237      |
| ARF18_AT3G61830                             | -----        | -----      | TSV ISQ 241      |
| ARF1_AT1G59750                              | -----        | -----      | SSV ISS 237      |
| ZmGRMZM2G017187_P02                         | -----        | -----      | SSV IS - 241     |
| ARF2_AT5G62000                              | -----        | -----      | SSV ISS 276      |
| ZmGRMZM2G006042_P01                         | -----        | -----      | SSV ISS 259      |
| Pt179307_gw1.I.7907.1                       | -----        | -----      | SSV MSS 224      |
| ARF21_AT1G34410                             | -----        | -----      | SSV ISI 239      |
| ARF20_AT1G35240                             | -----        | -----      | SSV ISI 235      |
| ARF22_AT1G34390                             | -----        | -----      | SSV ISI 237      |
| ARF12_AT1G34310                             | -----        | -----      | SSV ISI 239      |
| ARF15_AT1G35520                             | -----        | -----      | SS - VSI 243     |
| ARF14_AT1G35540                             | -----        | -----      | SSV ISI 239      |
| ARF13_AT1G34170                             | -----        | -----      | SSV ISA 239      |
| ARF4_AT5G60450                              | -----        | -----      | DSL I EK 289     |
| ARF3_AT2G33860                              | -----        | -----      | SAQYN - 271      |
| Pt243681_gw1.XIV.424.1                      | -----        | -----      | ANVITA 221       |
| Selmo1_2_61688                              | LSGNGS -     | GTS        | GASFARN - RA 251 |
| Selmo1_2_51695                              | GTLMGNGSS    | RSAGGGGNG  | GGSETRN - RA 273 |
| Phypa_108888                                | G - VSRGSG   | GAST       | TSSFARN - RA 249 |
| ARF10_AT2G28350                             | MMMMKRN -    | NDGNAAA    | TG 264           |
| ARF16_AT4G30080                             | S -          | NCSADR     | KG 266           |
| Phypa_61245                                 |              | PSS        | NSKAAQE - QC 143 |
| ZmGRMZM2G005284_P01                         |              | VRGNA      | SGTGAAA - DG 263 |
| ARF17_AT1G77850                             |              | GSP        | KKTFRRSNG 261    |
| Phypa_170581                                | Q - GRHSMPSS | LHHQQGVNSA | QNGMPNGSHN 480   |
| all_Phypa_171888                            | QKGGLSMPSS   | AHLQQGVQSV | QNAMSNVGHN 568   |
| Selmo1_2_405821                             |              |            | -RGATLSS 100     |
| Selmo1_2_431298                             |              |            | NGASQSV 157      |
| Selmo1_2_431277                             |              |            | 17               |
| corb_UMD_Coleochaete_c9703_c_s_1            |              |            | 38               |
| spra_Contig219_1                            |              |            | RVSEKVN 155      |
| IAA12_AT1G04550                             |              |            | 103              |
| Consensus                                   |              |            | SSV LSS          |
| Conservation                                |              |            |                  |

|                                              |                       |                       |                                |     |
|----------------------------------------------|-----------------------|-----------------------|--------------------------------|-----|
| Phypha1_1_168019_estExt_fgenes1_pg.C_1630077 | <b>DSMHIGVLA</b> A    | <b>ANHAAA</b> TSSR    | <b>FTIFY</b> - - <b>NPR</b>    | 339 |
| Phypha_218828                                | <b>DSMHIGVLA</b> A    | <b>ANHAAA</b> TSSR    | <b>FTIFY</b> - - <b>NPR</b>    | 174 |
| Phypha1_1_127416_e_gw1.65.212.1              | <b>DSMHIGVLA</b> A    | <b>ANHAAA</b> TSSR    | <b>FTIFY</b> - - <b>NPR</b>    | 259 |
| Phypha1_1_50215_gw1.6.284.1                  | <b>DSMHFGVLA</b> A    | <b>ASHAAA</b> TSSR    | <b>FKIFY</b> - - <b>NPR</b>    | 253 |
| Phypha_167026                                | <b>DSMHFGVLA</b> A    | <b>ASHAAA</b> TSSR    | <b>FKIFY</b> - - <b>NPR</b>    | 448 |
| Phypha1_1_136986_e_gw1.133.91.1              | <b>DSMHFGVLA</b> A    | <b>ASHAAA</b> TSSR    | <b>FKIFY</b> - - <b>NPR</b>    | 255 |
| Phypha_188433                                | <b>DSMHIGVLA</b> A    | <b>ASHAAQTSSR</b>     | <b>FTIFY</b> - - <b>NPR</b>    | 284 |
| Phypha_165321                                | <b>DSMHIGVLA</b> A    | <b>ASHAAQTSSR</b>     | <b>FTIFY</b> - - <b>NPR</b>    | 273 |
| ARF8_AT5G37020                               | <b>D-MHIGVLA</b> A    | <b>AAHASA</b> TNSC    | <b>FTVFF</b> - - <b>HPR</b>    | 266 |
| Pt198791_gw1.IV.3880.1                       | <b>DSMHIGVLA</b> A    | <b>AAHA - ATNSC</b>   | <b>FTVFF</b> - - <b>NPR</b>    | 252 |
| ARF6_AT1G30330                               | <b>-SMHLGLLA</b> A    | <b>AAHAAA</b> TNSR    | <b>FTIFY</b> - - <b>NPR</b>    | 267 |
| Pt205407_gw1.V.808.1                         | <b>DSMHIGVLA</b> A    | <b>AAHA - ATNSR</b>   | <b>FTIFY</b> - - <b>NPR</b>    | 253 |
| Selmo1_117217_e_gw1.55.235.1                 | <b>DSMYIGVLA</b> A    | <b>AAHANSTSSR</b>     | <b>FTIFY</b> - - <b>NPR</b>    | 273 |
| Selmo1_422125                                | <b>DSMYIGVLA</b> A    | <b>AAHANSTSSR</b>     | <b>FTIFY</b> - - <b>NPR</b>    | 257 |
| Selmo1_424114_fgenes2_pg.C_scaffold.65000063 | <b>DSMLIGVLA</b> A    | <b>AAHAASTNSR</b>     | <b>FTIFY</b> - - <b>NPR</b>    | 264 |
| Selmo1_446535                                | <b>DSMLIGVLA</b> A    | <b>AAHAASTNSR</b>     | <b>FTIFY</b> - - <b>NPR</b>    | 264 |
| Selmo1_181406_estExt_Genewise1Plus.C_650169  | <b>DSMLIGVLA</b> A    | <b>AAHAASTNSR</b>     | <b>FTIFY</b> - - <b>NPR</b>    | 262 |
| ARF19_AT1G19220                              | <b>D-MHIGVLA</b> A    | <b>AAHANANSSP</b>     | <b>FTIFF</b> - - <b>NPR</b>    | 266 |
| ARF7_AT5G20730                               | <b>S-MHIGVLA</b> A    | <b>AAHANANSSP</b>     | <b>FTIFY</b> - - <b>NPR</b>    | 267 |
| ZmGRMZM2G014864_P01                          | <b>DSMHIGVLA</b> A    | <b>AAHA - ANNSP</b>   | <b>FTIFY</b> - - <b>NPR</b>    | 172 |
| ARF5_AT1G19850                               | <b>DSMHIGVLA</b> A    | <b>AAHATA</b> NRTP    | <b>FLIFY</b> - - <b>NPR</b>    | 298 |
| Selmo1_437944_estExt_fgenes2_pg.C_10526      | <b>HSMHLGVL</b> AA    | <b>AAHAA</b> STKTM    | <b>FTIFY</b> - - <b>NPR</b>    | 283 |
| all_Phypha_77324                             | <b>ANLHLGVL</b> AA    | <b>ASHAA</b> TERLR    | <b>FVVIY</b> - - <b>NPR</b>    | 564 |
| all_Phypha_159688                            | <b>ANLHLGVL</b> AA    | <b>ASHAA</b> TERLR    | <b>FVVIY</b> - - <b>NPR</b>    | 411 |
| all_Phypha_225990                            | <b>TNLHLGVL</b> AA    | <b>ASHAS</b> REGMR    | <b>FVVIY</b> - - <b>NPR</b>    | 249 |
| all_Phypha_171197                            | <b>TNLHLGVL</b> AA    | <b>ASHAS</b> REGMR    | <b>FVVIY</b> - - <b>NPR</b>    | 653 |
| Pt179921_gw1.I.8521.1                        | <b>QSMHLGVL</b> AT    | <b>ASHAA</b> STLT -   | <b>FVVIY</b> - - <b>KPR</b>    | 248 |
| Pt245007gw1.XIV.1750.1                       | <b>QSMHLGVL</b> AT    | <b>ASHAA</b> LTHL -   | <b>FVVIY</b> - - <b>KPR</b>    | 249 |
| ARF9_AT4G23980                               | <b>HSMHLGVL</b> AT    | <b>A - HAT</b> QTKTM  | <b>FVVIY</b> - - <b>KPR</b>    | 256 |
| ARF11_AT2G46530                              | <b>-QSMGLGVL</b> AT   | <b>ASHAA</b> TTTT -   | <b>FVVIY</b> - - <b>KPR</b>    | 264 |
| ARF18_AT3G61830                              | <b>-SMHLGVL</b> AT    | <b>ASHAA</b> RTTT -   | <b>FVVIY</b> - - <b>KPR</b>    | 268 |
| ARF1_AT1G59750                               | <b>HSM - IGV</b> LAT  | <b>AAHAA</b> TTGT -   | <b>FVVIY</b> - - <b>KPR</b>    | 264 |
| ZmGRMZM2G017187_P02                          | <b>HSMHLGVL</b> AT    | <b>ASHAA</b> STGT -   | <b>FVVIY</b> - - <b>KPR</b>    | 269 |
| ARF2_AT5G62000                               | <b>HSMHLGVL</b> AT    | <b>AWHAA</b> STGTM    | <b>FTVVIY</b> - - <b>KPR</b>   | 304 |
| ZmGRMZM2G006042_P01                          | <b>HSMHLGVL</b> AT    | <b>AWHAA</b> NTGSM    | <b>FTVVIY</b> - - <b>KPR</b>   | 287 |
| Pt179307_gw1.I.7907.1                        | <b>HSMHLGVL</b> AT    | <b>VWHAAS - GSM</b>   | <b>FTVVIY</b> - - <b>KPR</b>   | 251 |
| ARF21_AT1G34410                              | <b>D - MRHG</b> VIAS  | <b>AKHAF</b> DNQCI    | <b>FIVVIY</b> - - <b>KP</b> -  | 265 |
| ARF20_AT1G35240                              | <b>DCMRH - V</b> IAS  | <b>AKHAF</b> DNQCI    | <b>FIVVIY</b> - - <b>KPS</b>   | 263 |
| ARF22_AT1G34390                              | <b>ESM - HG</b> VIAS  | <b>AKHAF</b> DNQCM    | <b>FIVVIY</b> - - <b>KP</b> -  | 262 |
| ARF12_AT1G34310                              | <b>D - MRHG</b> VVAS  | <b>AKHAF</b> DNQCM    | <b>FTVVIY</b> - - <b>KP</b> -  | 265 |
| ARF15_AT1G35520                              | <b>DCMRHG</b> VVAS    | <b>AKHAF</b> DNQCM    | <b>FIVVIY</b> - - <b>KP</b> -  | 270 |
| ARF14_AT1G35540                              | <b>E - MRHG</b> VIAS  | <b>AKHAF</b> DNQCM    | <b>FIVVIY</b> - - <b>KP</b> -  | 265 |
| ARF13_AT1G34170                              | <b>NMQH - G</b> VIAS  | <b>VVNAF</b> KTCKM    | <b>FNVVIY</b> - - <b>KP</b> -  | 265 |
| ARF4_AT5G60450                               | <b>NSCS - N</b> IAS   | <b>VANA</b> STKSM     | <b>FHVVIY</b> - - <b>SPR</b>   | 316 |
| ARF3_AT2G33860                               | <b>QNMNHN</b> NSE     | <b>VAAH</b> STHSV     | <b>FSISY</b> - - <b>NPK</b>    | 299 |
| Pt243681_gw1.XIV.424.1                       | <b>HSMQLGL</b> ISS    | <b>ASHAA</b> STGS -   | <b>FTIFF</b> - - <b>HP</b> -   | 247 |
| Selmo1_2_61688                               | <b>RVTSKSVLE</b> A    | <b>A - S</b> LAAAGQA  | <b>FEVVIY</b> - - <b>YPR</b>   | 278 |
| Selmo1_2_51695                               | <b>KVTAKSVLD</b> A    | <b>A - T</b> LAASGKA  | <b>FEVVIY</b> - - <b>YPR</b>   | 300 |
| Phypha_108888                                | <b>RVTAKSVLD</b> A    | <b>A - A</b> LAVAGKP  | <b>FEVVIY</b> - - <b>YPR</b>   | 276 |
| ARF10_AT2G28350                              | <b>RVRVEAVAE</b> A    | <b>V - A</b> RAACGQA  | <b>FEVVIY</b> - - <b>YPR</b>   | 291 |
| ARF16_AT4G30080                              | <b>KVTAESVLE</b> A    | <b>A - T</b> LAISGRP  | <b>FEVVIY</b> - - <b>YPR</b>   | 293 |
| Phypha_61245                                 | <b>VASASSV</b> EG     | <b>S - S</b> LFEGLR   | <b>VSPTS</b> - - <b>YSS</b>    | 170 |
| ZmGRMZM2G005284_P01                          | <b>VLRAEDV</b> AA     | <b>AVT</b> AAAGNP     | <b>FEVVIH</b> - - <b>YPR</b>   | 291 |
| ARF17_AT1G77850                              | <b>KLTAEA</b> VTDA    | <b>I - N</b> RASQGLP  | <b>FEVVI</b> - - <b>YPA</b>    | 288 |
| Phypha_170581                                | <b>GMVHQQA</b> VHS    | <b>APNG</b> LPNASY    | <b>SGMMH</b> - - <b>QQG</b>    | 508 |
| all_Phypha_171888                            | <b>GM</b> - - - - -   | - - - - -             | - - - <b>MH</b> - - <b>QQG</b> | 575 |
| Selmo1_2_405821                              | <b>SW - - -</b> GAPGN | <b>AND - - -</b> SDRE | <b>CTL</b> - - - - -           | 117 |
| Selmo1_2_431298                              | <b>PGF</b> PSGLPSP    | <b>RNEG</b> LPSHRK    | <b>VDMHQ</b> - - <b>QQL</b>    | 185 |
| Selmo1_2_431277                              | - - - - -             | - - - - -             | - - - - -                      | 17  |
| corb_UMD_Coleochaete_c9703_c_s_1             | - - - - -             | - - - - -             | - - - - -                      | 38  |
| spra_Contig219_1                             | <b>SSQSMM</b> LFR     | <b>VIES</b> NPNTGV    | <b>FKRLHVA</b> YPR             | 185 |
| IAA12_AT1G04550                              | - - - - -             | - - <b>VKNDE</b>      | <b>KDVS</b> MKVNP              | 119 |

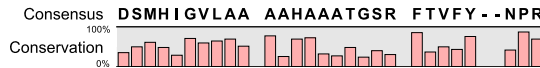

|                                             | 1,060       | 1,080       |                |
|---------------------------------------------|-------------|-------------|----------------|
| Phypa1_1_168019_estExt_fgenes1_pg.C_1630077 | -QSPSEFVIP  | VAKYQKALCN  | -LQVSVGMRP 367 |
| Phypa_218828                                | -QSPSEFVIP  | VAKYQKALCN  | -LQVSVGMRP 202 |
| Phypa1_1_127416_e_gw1.65.212.1              | -QSPSEFVIP  | VAKYQKALCS  | -LQVSVGMRP 287 |
| Phypa1_1_50215_gw1.6.284.1                  | -QSPSEFVIP  | VAKYQKALYN  | -TQFTVGMRP 281 |
| Phypa_167026                                | -QSPSEFVIP  | LTKYHKALYN  | -TQFTVGMRP 476 |
| Phypa1_1_136986_e_gw1.133.91.1              | -QSPSEFVIP  | LTKYHKALYN  | -TQFTVGMRP 283 |
| Phypa_188433                                | -QSPSEFVIP  | SAKYQKAVYS  | -TQFTVGMRP 312 |
| Phypa_165321                                | -QSPSEFVIP  | SAKYQKAVYS  | -TQFTVGMRP 301 |
| ARF8_AT5G37020                              | -ASQSEFVQ   | LSKYTKAVFH  | -TRVSVGMRP 294 |
| Pt198791_gw1.IV.3880.1                      | -ASPSEFVIP  | LSKYVKAVFH  | -TRVSVGMRP 280 |
| ARF6_AT1G30330                              | -ASPSEFVIP  | LAKYVKAVYH  | -TRVSVGMRP 295 |
| Pt205407_gw1.V.808.1                        | -ASPSEFVIP  | VKYLKAVYH   | -TRVSVGMRP 281 |
| Selmo1_117217_e_gw1.55.235.1                | -ASPSEFVIP  | LSKYNNAVYN  | NMQVSPGMRP 302 |
| Selmo1_422125                               | -ASPSEFVIP  | LSKYNNAVYN  | NMQVSPGMRP 286 |
| Selmo1_424114_fgenes2_pg.C_scaffold_6500063 | -ASPSEFVIP  | LAKYQKALHP  | P-QLTVGMRP 292 |
| Selmo1_446535                               | -ASPSEFVIP  | LAKYQKALHP  | P-QLTVGMRP 292 |
| Selmo1_181406_estExt_Genewise1Plus.C_650169 | -ASFSEFVVP  | FCRFKATYH   | P-RVTVGMRP 290 |
| ARF19_AT1G19220                             | -ASPSEFVVP  | LAKYNNKALYA | --QVSLGMRP 293 |
| ARF7_AT5G20730                              | WAAPAEFVVP  | LAKYTKAMYA  | --QVSLGMRP 295 |
| ZmGRMZM2G014864_P01                         | -ASPTFEFVVP | FAKYQKALYG  | -NQISLGMRF 200 |
| ARF5_AT1G19850                              | -ACPAEFVVP  | LAKYRKAICG  | --SQLVGMRF 325 |
| Selmo1_437944_estExt_fgenes2_pg.C_10526     | -ASPAEFVVP  | YHKYVKAFTH  | --NLSVGMRF 310 |
| all_Phypa_77324                             | -TSPSEFVIP  | YHKYLRSEDN  | --NLTVGSRF 591 |
| all_Phypa_159688                            | -TSPSEFVIP  | YHKYLKTKEN  | --NLTVGSRF 438 |
| all_Phypa_225990                            | -TSPSEFVIP  | YNKFLKAMDN  | --KLANGSRF 276 |
| all_Phypa_171197                            | -TSPSEFVIP  | YHKFLKAMDY  | --NLANGSRF 680 |
| Pt179921_gw1.I.8521.1                       | TS--QFLLS   | LNKYLEAVSN  | --KFLVGMRF 273 |
| Pt245007gw1.XIV.1750.1                      | TN--QYLLG   | LNKYLEAVKN  | --GFSVGMRF 274 |
| ARF9_AT4G23980                              | TS--QFLLS   | LNKYLEAMSN  | --KFSVGMRF 281 |
| ARF11_AT2G46530                             | TS--QFLLS   | VNKYMMAMKN  | --GFSVGMRF 289 |
| ARF18_AT3G61830                             | TS--QFLLG   | VNKYMEALKH  | --GFSVGMRF 293 |
| ARF1_AT1G59750                              | -TSRSEFVVS  | VNRYLEAKTQ  | --KLSVGMRF 291 |
| ZmGRMZM2G017187_P02                         | -TSRSDFVVS  | VNKYLEAKKQ  | --KLSVGMRF 296 |
| ARF2_AT5G62000                              | -TSPSEFVVP  | FDQYMES-KN  | --NYSVGMRF 330 |
| ZmGRMZM2G006042_P01                         | -TSPAEFVVS  | RARYCESLKR  | --NYSVGMRF 314 |
| Pt179307_gw1.I.7907.1                       | -TSPAEFLLP  | LDKYRESVKI  | --NYAVGMRF 278 |
| ARF21_AT1G34410                             | RS-SQFVVS   | YDKFLDAVNN  | --KFNVGSRF 291 |
| ARF20_AT1G35240                             | RS-SQFVVS   | YDKFLDAMNN  | --KFLVGSRF 289 |
| ARF22_AT1G34390                             | RS-SQFVVS   | YDKFLDAVNN  | --KFNVGSRF 289 |
| ARF12_AT1G34310                             | RS-SKFVVS   | YDKFLDAVNN  | --KFNVGSRF 291 |
| ARF15_AT1G35520                             | RS-SQFVVS   | YDKFLDAVNN  | --KFNVGSRF 296 |
| ARF14_AT1G35540                             | RS-SQFVVS   | YDKFLDVVNN  | --KFNVGSRF 291 |
| ARF13_AT1G34170                             | --SSSQFVVS  | YDKFLDAMNN  | --NYVGSRF 291  |
| ARF4_AT5G60450                              | ATH--AFVLP  | YEKYLTSIRS  | P--VCLGTRF 342 |
| ARF3_AT2G33860                              | -ASWSNFP    | APKFLKVVQY  | PF--LGMRF 325  |
| Pt243681_gw1.XIV.424.1                      | WTSPAEFLLP  | FDQYMKSAE   | -LEYSVGMRF 275 |
| Selmo1_2_61688                              | A-STAEFCVR  | ASVVKASLEH  | --SWYVGMRF 305 |
| Selmo1_2_51695                              | A-STAEFCVR  | AQTVRAALSH  | --GWVAGMRP 327 |
| Phypa_108888                                | A-STAEFCVK  | AGLVKQALDH  | --TWVAGMRP 303 |
| ARF10_AT2G28350                             | A-STPEFCVK  | AADVRSAMRT  | --RWCSGMRP 318 |
| ARF16_AT4G30080                             | A-STSEFCVK  | ALDARAAMRT  | --PWCSGMRP 320 |
| Phypa_61245                                 | SDNTLEHKDR  | MRRRENADLNG | --A--SG-- 193  |
| ZmGRMZM2G005284_P01                         | ATAPA-FCVVR | VATVIEALQV  | --SWCPGLRF 318 |
| ARF17_AT1G77850                             | A-GWSEFVVR  | AEDVSSMSM   | --YWTPGTRV 315 |
| Phypa_170581                                | GHRIQDGMHL  | STGHVSSMGP  | QNPQNSAVI 538  |
| all_Phypa_171888                            | GLRMQDGLV   | PAGHMSSVGP  | QKRGHSGAII 605 |
| Selmo1_2_405821                             | -----       | -----       | ---FG---F 120  |
| Selmo1_2_431298                             | RLCIQQF---  | -----REKKI  | PPQFGRSSF 207  |
| Selmo1_2_431277                             | -----       | -----       | ----- 17       |
| corb_UMD_Coleochaete_c9703_c_s_1            | -----       | -----       | ----- 38       |
| spra_Contig219_1                            | TDSWQDTAMS  | PASLVSP---  | ---FSPSPFP 209 |
| IAA12_AT1G04550                             | VQ-----     | -----       | -----GLGF 125  |
| Consensus                                   | -XSPSEFVIP  | LAKYLKAVYN  | --QFSVGMRF     |

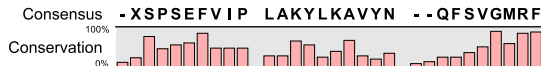



|                                              |                   |                    |                   |               |     |
|----------------------------------------------|-------------------|--------------------|-------------------|---------------|-----|
| Phypha1_1_168019_estExt_fgenes1_pg.C_1630077 | <b>RMVFETEES</b>  | <b>-VRRYMGTT</b>   | <b>GMGD</b>       | <b>--DPI</b>  | 394 |
| Phypha_218828                                | <b>RMVFETEES</b>  | <b>-VRRYMGTT</b>   | <b>GMGD</b>       | <b>--DPI</b>  | 229 |
| Phypha1_1_127416_e_gw1.65.212.1              | <b>RMVFETEES</b>  | <b>-VRRYMGTT</b>   | <b>GMGD</b>       | <b>--DPI</b>  | 314 |
| Phypha1_1_50215_gw1.6.284.1                  | <b>RMAFETEES</b>  | <b>-VRKYMGTT</b>   | <b>IGDL</b>       | <b>--DPA</b>  | 308 |
| Phypha_167026                                | <b>RMVFETEES</b>  | <b>-VRRYVGTIT</b>  | <b>GLGD</b>       | <b>--DPI</b>  | 503 |
| Phypha1_1_136986_e_gw1.133.91.1              | <b>RMVFETEES</b>  | <b>-VRRYVGTIT</b>  | <b>GLGD</b>       | <b>--DPI</b>  | 310 |
| Phypha_188433                                | <b>RMMFETEEST</b> | <b>-VRRYMGTVT</b>  | <b>GIGDL</b>      | <b>--DPV</b>  | 339 |
| Phypha_165321                                | <b>RMVFETEEST</b> | <b>-VRRYMGTVT</b>  | <b>GIGDL</b>      | <b>--DPV</b>  | 328 |
| ARF8_AT5G37020                               | <b>RMLFETEES</b>  | <b>-VRRYMGTT</b>   | <b>GISD</b>       | <b>--DS</b>   | 320 |
| Pt198791_gw1.IV.3880.1                       | <b>RMLFETEES</b>  | <b>-VRRYMGTT</b>   | <b>GISD</b>       | <b>--DPV</b>  | 307 |
| ARF6_AT1G30330                               | <b>RMLFETEES</b>  | <b>-VRRYMGTT</b>   | <b>GICDL</b>      | <b>--DT</b>   | 321 |
| Pt205407_gw1.V.808.1                         | <b>RMLFETEES</b>  | <b>-VRRYMGTT</b>   | <b>GISD</b>       | <b>--DPV</b>  | 308 |
| Selmo1_117217_e_gw1.55.235.1                 | <b>RMQFETEESG</b> | <b>-IRRHTGTTV</b>  | <b>GSGD</b>       | <b>--DPV</b>  | 329 |
| Selmo1_422125                                | <b>RMQFETEESG</b> | <b>-IRRHTGTTV</b>  | <b>GSGD</b>       | <b>--DPV</b>  | 313 |
| Selmo1_424114_fgenes2_pg.C_scaffold_6500063  | <b>RMEMETEDSS</b> | <b>-TRRYMGTT</b>   | <b>GIGDL</b>      | <b>--DPV</b>  | 319 |
| Selmo1_446535                                | <b>RMEMETEDSS</b> | <b>-TRRYMGTT</b>   | <b>GIGDL</b>      | <b>--DPV</b>  | 319 |
| Selmo1_181406_estExt_Genewise1Plus.C_650169  | <b>RMELETEDSS</b> | <b>-TRRYMGTT</b>   | <b>GIGDL</b>      | <b>--DSV</b>  | 317 |
| ARF19_AT1G19220                              | <b>RMMFETEDCG</b> | <b>-VRRYMGTVT</b>  | <b>GISD</b>       | <b>--DP</b>   | 319 |
| ARF7_AT5G20730                               | <b>RMLFETEESG</b> | <b>-VRRYMGTVT</b>  | <b>GISD</b>       | <b>--DV</b>   | 321 |
| ZmGRMZM2G014864_P01                          | <b>RMMFETEESG</b> | <b>-TRRYMGTT</b>   | <b>GISD</b>       | <b>--DPV</b>  | 227 |
| ARF5_AT1G19850                               | <b>GMMFETEDSG</b> | <b>-KRRYMGTTV</b>  | <b>GISD</b>       | <b>--DPL</b>  | 352 |
| Selmo1_437944_estExt_fgenes2_pg.C_10526      | <b>KMRFETEES</b>  | <b>-ERRYMGTT</b>   | <b>GVGD</b>       | <b>--DSD</b>  | 337 |
| all_Phypha_77324                             | <b>KMKFETEEST</b> | <b>-ERRYSGTIV</b>  | <b>EISDV</b>      | <b>--DPL</b>  | 618 |
| all_Phypha_159688                            | <b>KMKFESDEST</b> | <b>-ERRYSGTIV</b>  | <b>EVSDA</b>      | <b>--DPL</b>  | 465 |
| all_Phypha_225990                            | <b>RMKFESSEES</b> | <b>-ERRFAGTT</b>   | <b>EVSDA</b>      | <b>--DPV</b>  | 303 |
| all_Phypha_171197                            | <b>RMKFESSEES</b> | <b>-GRRYAGTT</b>   | <b>EVNDA</b>      | <b>--DPL</b>  | 707 |
| Pt179921_gw1.I.8521.1                        | <b>KMRFEGEDSP</b> | <b>-DRRFSGTIV</b>  | <b>GVEDF</b>      | <b>--SP</b>   | 299 |
| Pt245007gw1.XIV.1750.1                       | <b>KMRFEGEDTP</b> | <b>-ERRFTGTTV</b>  | <b>GVGD</b>       | <b>--SP</b>   | 300 |
| ARF9_AT4G23980                               | <b>KMRFEGEDSP</b> | <b>-ERRYSGTIV</b>  | <b>GVKDC</b>      | <b>--SP</b>   | 307 |
| ARF11_AT2G46530                              | <b>RMRFEGEESP</b> | <b>-ERFTGTTV</b>   | <b>GSGD</b>       | <b>--SS</b>   | 315 |
| ARF18_AT3G61830                              | <b>RMRFEGEESP</b> | <b>-ERFTGTTV</b>   | <b>GSGD</b>       | <b>--SS</b>   | 319 |
| ARF1_AT1G59750                               | <b>KMRFEGEEAP</b> | <b>-EKRFSGTIV</b>  | <b>GVQE</b>       | <b>-NKSS</b>  | 318 |
| ZmGRMZM2G017187_P02                          | <b>KMRFEGDDAP</b> | <b>-ERRFSGTIV</b>  | <b>GIGSAMSKS</b>  | <b>--</b>     | 325 |
| ARF2_AT5G62000                               | <b>KMRFEGEEAP</b> | <b>-EQRFTGTTV</b>  | <b>GIEE</b>       | <b>--SDPT</b> | 357 |
| ZmGRMZM2G006042_P01                          | <b>RMRFEGEAA</b>  | <b>-EQRFTGTTV</b>  | <b>GICV</b>       | <b>--SDPS</b> | 340 |
| Pt179307_gw1.I.7907.1                        | <b>KMKFEAEEAP</b> | <b>-EQRFSGTIV</b>  | <b>GVEE</b>       | <b>--ADPK</b> | 305 |
| ARF21_AT1G34410                              | <b>TMRFEGDDFS</b> | <b>-ERRYFGTIV</b>  | <b>GVSD</b>       | <b>--SP</b>   | 317 |
| ARF20_AT1G35240                              | <b>TMRFEGDDFS</b> | <b>-ERRYFGTIV</b>  | <b>GVND</b>       | <b>--SP</b>   | 315 |
| ARF22_AT1G34390                              | <b>TMRFEGDDFS</b> | <b>-ERRYFGTIV</b>  | <b>GVSD</b>       | <b>--SP</b>   | 315 |
| ARF12_AT1G34310                              | <b>TMRLEGDDFS</b> | <b>-ERRCFGTIV</b>  | <b>GVSD</b>       | <b>--SP</b>   | 317 |
| ARF15_AT1G35520                              | <b>TMRFEGDDFS</b> | <b>-ERRYFGTIV</b>  | <b>GVSN</b>       | <b>--P</b>    | 321 |
| ARF14_AT1G35540                              | <b>TMRFEGDDFS</b> | <b>-ERRSFGTIV</b>  | <b>GVSD</b>       | <b>--SP</b>   | 317 |
| ARF13_AT1G34170                              | <b>RMQFEGKDFS</b> | <b>-EKRYDGTIV</b>  | <b>GVND</b>       | <b>--SP</b>   | 317 |
| ARF4_AT5G60450                               | <b>RMRFEMDDSP</b> | <b>-ERRCAGVTV</b>  | <b>GVCD</b>       | <b>--DPY</b>  | 369 |
| ARF3_AT2G33860                               | <b>KARVESEDAS</b> | <b>-ERRSPGLS</b>   | <b>GISD</b>       | <b>--DPI</b>  | 352 |
| Pt243681_gw1.XIV.424.1                       | <b>IMQFEGEECT</b> | <b>-EQR</b>        | <b>-----</b>      | <b>-----</b>  | 288 |
| Selmo1_2_61688                               | <b>KMAFETEDSS</b> | <b>RISWFMGTIS</b>  | <b>A-VQ</b>       | <b>-PADPI</b> | 333 |
| Selmo1_2_51695                               | <b>KMAFETEDSS</b> | <b>RISWFMGTIS</b>  | <b>A-VQ</b>       | <b>-AADPI</b> | 355 |
| Phypha_108888                                | <b>KMAFETEDSS</b> | <b>RISWFMGTIA</b>  | <b>A-VK</b>       | <b>-PADPI</b> | 331 |
| ARF10_AT2G28350                              | <b>KM-FETEDSS</b> | <b>RISWFMGTVS</b>  | <b>A-VQ</b>       | <b>-VADPI</b> | 345 |
| ARF16_AT4G30080                              | <b>MA-FETEDSS</b> | <b>RISWFMGTVS</b>  | <b>A-VN</b>       | <b>-VSDPI</b> | 347 |
| Phypha_61245                                 | <b>---GTGD---</b> | <b>-----GAMS</b>   | <b>R-YR</b>       | <b>-QNE</b>   | 207 |
| ZmGRMZM2G005284_P01                          | <b>KM-FAAKDLS</b> | <b>RISWFMGTVA</b>  | <b>G-VG</b>       | <b>-PADPA</b> | 345 |
| ARF17_AT1G77850                              | <b>KMAME-EDSS</b> | <b>RITWFQGTIVS</b> | <b>STYQ</b>       | <b>-ETGP</b>  | 342 |
| Phypha_170581                                | <b>HQSVQGCSG</b>  | <b>MQQQQMVP</b>    | <b>SLHRDIQ</b>    | <b>---</b>    | 565 |
| all_Phypha_171888                            | <b>HQPVQGFSSS</b> | <b>MQQQQTGF</b>    | <b>PLLRMQVMQ</b>  | <b>---</b>    | 635 |
| Selmo1_2_405821                              | <b>WIKAKTAAAS</b> | <b>TAKDDV</b>      | <b>---</b>        | <b>---</b>    | 136 |
| Selmo1_2_431298                              | <b>SNQQHEVAQS</b> | <b>TCRQQTKLHM</b>  | <b>FPRSNRLPEL</b> | <b>---</b>    | 237 |
| Selmo1_2_431277                              | <b>-----</b>      | <b>-----</b>       | <b>-----</b>      | <b>-----</b>  | 17  |
| corb_UMD_Coleochaete_c9703_c_s_1             | <b>-----</b>      | <b>-----</b>       | <b>-----</b>      | <b>-----</b>  | 38  |
| spra_Contig219_1                             | <b>QNCYTPSNSY</b> | <b>ELNGMEKN</b>    | <b>TL</b>         | <b>-----</b>  | 231 |
| IAA12_AT1G04550                              | <b>-----</b>      | <b>-----</b>       | <b>-----</b>      | <b>-----</b>  | 125 |

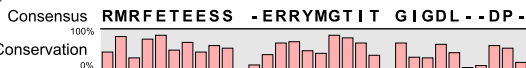

|                                              | 1,120       | 1,140      |                    |
|----------------------------------------------|-------------|------------|--------------------|
| Phypha1_1_168019_estExt_fgenes1_pg.C_1630077 | RWPNSHWRSL  | KVG----    | WD ES-TAGERQR 418  |
| Phypha_218828                                | RWPNSHWRSL  | KVG----    | WD ES-TAGERQR 253  |
| Phypha1_1_127416_e_gw1.65.212.1              | RWPNSHWRSL  | KVG----    | WD ES-TAGERQR 338  |
| Phypha1_1_50215_gw1.6.284.1                  | RWPKSDWRSL  | KVG----    | WD ES-IGDRQH 332   |
| Phypha_167026                                | RWPKSHWRSL  | KVG----    | WD ES-TAGERQH 527  |
| Phypha1_1_136986_e_gw1.133.91.1              | RWPKSHWRSL  | KVG----    | WD ES-TAGERQH 334  |
| Phypha_188433                                | RWPNSHWRSL  | KVG----    | WD ES-TAGERQR 363  |
| Phypha_165321                                | RWPNSHWRSL  | KVG----    | WD ES-TAGERQR 352  |
| ARF8_AT5G37020                               | RWPNSHWRSL  | KVG----    | WD ES-TAGERQP 344  |
| Pt198791_gw1.IV.3880.1                       | RWPNSHWRSL  | KVG----    | D ES-TAGERQP 330   |
| ARF6_AT1G30330                               | RWANSHWRSL  | KVG----    | WD ES-TAGERQP 345  |
| Pt205407_gw1.V.808.1                         | RWPNSHWRSL  | KV-----    | WD ES-TAGERQP 331  |
| Selmo1_117217_e_gw1.55.235.1                 | RWPNSHWRSL  | KVE-----   | WD EP-AAGEKQQ 353  |
| Selmo1_422125                                | RWPNSHWRSL  | KVE-----   | WD EP-AAGEKQQ 337  |
| Selmo1_424114_fgenes2_pg.C_scaffold_6500063  | RWPNSHWRSL  | KVG----    | WD ES-TAGQKQR 343  |
| Selmo1_446535                                | RWPNSHWRSL  | KVG----    | WD ES-TAGQKQR 343  |
| Selmo1_181406_estExt_Genewise1Plus.C_650169  | RWPNSLWRTL  | KVG----    | WD ES-TAGQKQR 341  |
| ARF19_AT1G19220                              | VWKSQWRNL   | QVG----    | WD ES-TAGDRPS 343  |
| ARF7_AT5G20730                               | RWKNSQWRNL  | QVG----    | WD ES-AAGDRPS 345  |
| ZmGRMZM2G014864_P01                          | RWKNSQWRNL  | QVG----    | D ES-AAGERRN 250   |
| ARF5_AT1G19850                               | RWPGSKWRNL  | QVE-----   | WD EP-GCNDKPT 376  |
| Selmo1_437944_estExt_fgenes2_pg.C_10526      | RWNLSKWRCL  | QVG----    | WD EQ-TANERQE 361  |
| all_Phypha_77324                             | KWPNSSAWRSM | KVE-----   | WD E--SASERHE 641  |
| all_Phypha_159688                            | KWPNSSAWRSM | KVE-----   | WD E--SASERHE 488  |
| all_Phypha_225990                            | RWPNSLWRSM  | KVE-----   | WD EVISASERHE 328  |
| all_Phypha_171197                            | RWPNSLWRSM  | KVE-----   | WD EVISASDRHE 732  |
| Pt179921_gw1.I.8521.1                        | HWNDKSWRSL  | KVQ----    | WD EPAPL--PPD 322  |
| Pt245007gw1.XIV.1750.1                       | EWSGSLWRSL  | KIQ-----   | WD EPATL--RPE 323  |
| ARF9_AT4G23980                               | HWKDSKWRCL  | EVH-----   | D EPASL--SRPN 330  |
| ARF11_AT2G46530                              | QWP-ASWRSL  | QIQ-----   | WD EPSSL--QRPN 338 |
| ARF18_AT3G61830                              | QPA-SKWRSL  | QVQ----    | WD EPTTV--QRPD 342 |
| ARF1_AT1G59750                               | VW-DEWRSL   | KVQ----    | WD EPSSV--FRPE 341 |
| ZmGRMZM2G017187_P02                          | LWADSDWRSL  | KVQ----    | WD EPSSL--LRPD 349 |
| ARF2_AT5G62000                               | RWPKSKWRSL  | KVR-----   | WD ETSSL--PRPD 381 |
| ZmGRMZM2G006042_P01                          | GWADSKWRSL  | KVR-----   | WD EASSV--PRPE 364 |
| Pt179307_gw1.I.7907.1                        | KWPRSKWRCL  | KVR-----   | WD -TSPV--HRPD 328 |
| ARF21_AT1G34410                              | HWKSE-WRSL  | EVQ----    | WD EFASF--SRPN 340 |
| ARF20_AT1G35240                              | HWKCS-WRSL  | EVQ----    | WD EFASF--SRPN 338 |
| ARF22_AT1G34390                              | HWKCS-WRNL  | EVQ----    | WD EFASF--SRPN 338 |
| ARF12_AT1G34310                              | HWKSE-WRSL  | EVQ----    | WD EFTSF--PGPK 340 |
| ARF15_AT1G35520                              | HWKCSDWRSL  | EVQ----    | WD EFASF--LRPN 345 |
| ARF14_AT1G35540                              | HWKSE-WRSL  | EVQ----    | WD EFASF--PRPN 340 |
| ARF13_AT1G34170                              | HWK-SEWRSL  | KVQ----    | WD ELSPF--LRPN 340 |
| ARF4_AT5G60450                               | RWPNSKWRCL  | LVR-----   | WD ESF-VSDHQE 393  |
| ARF3_AT2G33860                               | RWPGSKWRCL  | LVR-----   | WD DIVANG-HQQ 376  |
| Pt243681_gw1.XIV.424.1                       |             |            | 288                |
| Selmo1_2_61688                               | RWPSSPWRLL  | QVS-----   | WD EPDLL-QGVN 357  |
| Selmo1_2_51695                               | LWPSSPWRVL  | QVA-----   | WD EPDLL-QGVS 379  |
| Phypha_108888                                | LWPNSPWR--  | -VT-----   | WD EPDLL-QGVS 352  |
| ARF10_AT2G28350                              | RWPNSPWRLL  | QVA-----   | WD EPDLL-QNVK 369  |
| ARF16_AT4G30080                              | RWPNSPWRLL  | QVA-----   | WD EPDLL-QNVK 371  |
| Phypha_61245                                 | --GGPWPEL   | SJG-----   | TE VGSLL----- 223  |
| ZmGRMZM2G005284_P01                          | RWPLSPWRFL  | QVT-----   | WD EPELV-RNMN 369  |
| ARF17_AT1G77850                              | -WRGSPWKQL  | QIT-----   | WD EPELV-QNVK 365  |
| Phypha_170581                                | QTPNNWYPSI  | R-----     | DSSTMSETQP 586     |
| all_Phypha_171888                            | QMPNSWYPSI  | R-----     | DTTITSETQP 656     |
| Selmo1_2_405821                              | -----HK-    |            | 138                |
| Selmo1_2_431298                              | GSPSFGQHRQ  | RRR-----   | PQ GSRVGSFRLQ 262  |
| Selmo1_2_431277                              |             |            | 17                 |
| corb_UMD_Coleochaete_c9703_c_s_1             |             |            | 38                 |
| spra_Contig219_1                             | -----DWNAL  | KKGEGNHNWE | EKERERKEKE 256     |
| IAA12_AT1G04550                              |             |            | 125                |

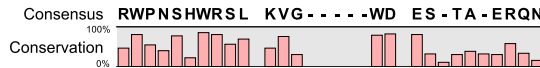



|                                              | 1,180      | 1,200      |            |     |
|----------------------------------------------|------------|------------|------------|-----|
| Phypha1_1_168019_estExt_fgenes1_pg.C_1630077 | K--RPWGGRV | ---DEE-MD  | SMLKKASFW  | 466 |
| Phypha_218828                                | K--RPWGGRV | ---DEE-MD  | SMLKKASFW  | 301 |
| Phypha1_1_127416_e_gw1.65.212.1              | K--RPRGGR- | ---D       | STSKKSSFW  | 381 |
| Phypha1_1_50215_gw1.6.284.1                  | K--RPQ---  | EDA-LE     | MLMKKSHMWP | 376 |
| Phypha_167026                                | K--RPRGMFG | ---EDD-LE  | MLMKKSHMWP | 575 |
| Phypha1_1_136986_e_gw1.133.91.1              | K--RPRGMP- | ---        | ---        | 366 |
| Phypha_188433                                | K--RARGIHG | ---EDEDLE  | TLMKKSPMWP | 412 |
| Phypha_165321                                | K--RARGIHG | ---EDEDLE  | ALMKKSQLWP | 401 |
| ARF8_AT5G37020                               | K--RP----  | ---        | ---WH      | 373 |
| Pt198791_gw1.IV.3880.1                       | K--RP----  | ---        | ---WH      | 359 |
| ARF6_AT1G30330                               | K--RP----  | ---        | ---WP      | 374 |
| Pt205407_gw1.V.808.1                         | K--RP----  | ---        | ---WP      | 360 |
| Selmo1_117217_e_gw1.55.235.1                 | K--RP----  | ---        | ---WS      | 383 |
| Selmo1_422125                                | K--RP----  | ---        | ---WS      | 367 |
| Selmo1_424114_fgenes2_pg.C_scaffold_6500063  | K--RPR---- | ---GTEEE   | LQMKAPSIWA | 387 |
| Selmo1_446535                                | K--RPR---- | ---GTEEE   | LQMKAPSIWA | 387 |
| Selmo1_181406_estExt_Genewise1Plus.C_650169  | K--RTRLDGM | LSFCAGELDE | LDAIRSQVWA | 393 |
| ARF19_AT1G19220                              | K--YPR--QP | GMPDDELDM  | NAFKRAMPWM | 393 |
| ARF7_AT5G20730                               | R--FSG--QP | GMPDDELDM  | SALKRAMPWL | 395 |
| ZmGRMZM2G014864_P01                          | K--RPR--Q- | -LDESSEME  | NLLKRAMPWL | 298 |
| ARF5_AT1G19850                               | L--HP----  | SYFAGETEWG | SLIKRPLIRV | 424 |
| Selmo1_437944_estExt_fgenes2_pg.C_10526      | KKFRPNTPAN | EFPTGKNNSD | ---        | 405 |
| all_Phypha_77324                             | KRRPPTFVTD | SATLGPSQSV | LD-----    | 688 |
| all_Phypha_159688                            | KRRPPTFVTD | SS--PQEF   | ISLHLSRRHS | 540 |
| all_Phypha_225990                            | KRRPLTLVKE | SP-LGT---  | ---YFVT--- | 372 |
| all_Phypha_171197                            | KRRSPTLVKD | PL-LGTSQSV | LDSYQSN--- | 783 |
| Pt179921_gw1.I.8521.1                        | KNKRPR---  | PPFELP---  | ---        | 358 |
| Pt245007gw1.XIV.1750.1                       | KSKRPRSD   | PTSEIT---  | ---        | 363 |
| ARF9_AT4G23980                               | KNKRPRQMS- | EVSALDV--- | ---        | 368 |
| ARF11_AT2G46530                              | KSKRSR---  | PISEITG--- | ---        | 375 |
| ARF18_AT3G61830                              | KCKRSR---  | PIEPSVK--- | ---        | 380 |
| ARF1_AT1G59750                               | RNKRPRP--- | PGLPS---   | ---        | 377 |
| ZmGRMZM2G017187_P02                          | RAKRPRP--- | PASPC---   | ---        | 383 |
| ARF2_AT5G62000                               | RPKRPRSNIA | PSSPDSSMLT | REGTTKANMD | 432 |
| ZmGRMZM2G006042_P01                          | RFKRSRSSVN | -ASPSDSTVN | REVASKVMVE | 414 |
| Pt179307_gw1.I.7907.1                        | QSKRHRS--- | ---        | ---        | 356 |
| ARF21_AT1G34410                              | KRLRE---   | ---        | ---        | 369 |
| ARF20_AT1G35240                              | KRLRE---   | ---        | ---        | 367 |
| ARF22_AT1G34390                              | KRLRE---   | ---        | ---        | 367 |
| ARF12_AT1G34310                              | KRLRE---   | ---        | ---        | 369 |
| ARF15_AT1G35520                              | KRLRE---   | ---        | ---        | 374 |
| ARF14_AT1G35540                              | KRSRE---   | ---        | ---        | 369 |
| ARF13_AT1G34170                              | HWLQ---    | ---        | ---        | 369 |
| ARF4_AT5G60450                               | RPKRP---   | ---        | ---        | 419 |
| ARF3_AT2G33860                               | PRSR---    | ---        | ---        | 403 |
| Pt243681_gw1.XIV.424.1                       | ---        | ---        | ---        | 288 |
| Selmo1_2_61688                               | KKLRP---   | ---        | ---        | 386 |
| Selmo1_2_51695                               | KKERQ---   | ---        | ---        | 408 |
| Phypha_108888                                | KKLRA---   | ---        | ---        | 381 |
| ARF10_AT2G28350                              | KKLRI---   | ---        | ---        | 398 |
| ARF16_AT4G30080                              | KKMRP---   | ---        | ---        | 401 |
| Phypha_61245                                 | ---        | ---        | ---        | 228 |
| ZmGRMZM2G005284_P01                          | KKRMP---   | ---        | ---        | 403 |
| ARF17_AT1G77850                              | KRLKY---   | ---        | ---        | 393 |
| Phypha_170581                                | LSQ---     | ---        | ---        | 618 |
| all_Phypha_171888                            | LSQ---     | ---        | ---        | 689 |
| Selmo1_2_405821                              | ---        | ---        | ---        | 146 |
| Selmo1_2_431298                              | ---        | ---        | ---        | 276 |
| Selmo1_2_431277                              | ---        | ---        | ---        | 17  |
| corb_UMD_Coleochaete_c9703_c_s_1             | ---        | ---        | ---        | 38  |
| spra_Contig219_1                             | ---        | ---        | ---        | 284 |
| IAA12_AT1G04550                              | ---        | ---        | ---        | 125 |

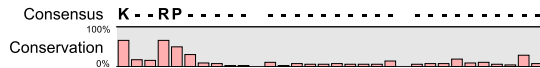

|                                              |                    |                    |                   |       |     |
|----------------------------------------------|--------------------|--------------------|-------------------|-------|-----|
| Phypha1_1_168019_estExt_fgenes1_pg.C_1630077 | <b>GDSGSHMDAL</b>  | <b>GALNLRNFGM</b>  | <b>S-SWMR</b>     | ----  | 491 |
| Phypha_218828                                | <b>GDSGSHMDAL</b>  | <b>GALNLRNFGM</b>  | <b>S-SWMR</b>     | ----  | 326 |
| Phypha1_1_127416_e_gw1.65.212.1              | <b>GDEDTGV--L</b>  | <b>GGNFRNLSM</b>   | <b>D-SWMR</b>     | ----  | 404 |
| Phypha1_1_50215_gw1.6.284.1                  | <b>HGS---DPS</b>   | <b>YSLKVGGLR</b>   | <b>DPLWMR</b>     | ----  | 398 |
| Phypha_167026                                | <b>NDS---DPL</b>   | <b>GLQKFGGLAM</b>  | <b>NTSWMR</b>     | ----  | 597 |
| Phypha1_1_136986_e_gw1.133.91.1              | -----              | -----              | -----             | ----- | 366 |
| Phypha_188433                                | <b>S-----</b>      | <b>LGFGT</b>       | <b>DSPWVG</b>     | ----  | 424 |
| Phypha_165321                                | <b>NS-----C</b>    | <b>DTLGFLSFGM</b>  | <b>EQPWMR</b>     | ----  | 420 |
| ARF8_AT5G37020                               | <b>AGTSSLP---</b>  | <b>DGRGDLGS</b>    | <b>GLTWLRGGGG</b> | 398   |     |
| Pt198791_gw1.IV.3880.1                       | <b>PGSPSL---</b>   | <b>-D---EASN</b>   | <b>GLMWLRGGSG</b> | 381   |     |
| ARF6_AT1G30330                               | <b>PGLPSFHGLK</b>  | <b>EDDMGMSMSS</b>  | <b>PLMWDR</b>     | ----  | 400 |
| Pt205407_gw1.V.808.1                         | <b>SGLPSFHG--</b>  | -----              | -----             | ----- | 368 |
| Selmo1_117217_e_gw1.55.235.1                 | <b>QA-----L</b>    | <b>GNPIA</b>       | -----             | ----- | 392 |
| Selmo1_422125                                | <b>QA-----L</b>    | <b>GNPIAREVE</b>   | <b>AVDAGKWIKS</b> | 390   |     |
| Selmo1_424114_fgenes2_pg.C_scaffold.6500063  | <b>RGEEGKFS-M</b>  | <b>QNMNFPGLSG</b>  | <b>MDHWLQ</b>     | ----  | 412 |
| Selmo1_446535                                | <b>RGEEGKFS-M</b>  | <b>QNMNFPGLSG</b>  | <b>MDHWLQ</b>     | ----  | 412 |
| Selmo1_181406_estExt_Genewise1Plus.C_650169  | <b>RAEDGKMD-I</b>  | <b>RAINAAGLS</b>   | <b>LEHWLR</b>     | ----  | 417 |
| ARF19_AT1G19220                              | <b>GEDF--GMK</b>   | <b>AQSSMFPGLS</b>  | <b>LVQWMS</b>     | ----  | 416 |
| ARF7_AT5G20730                               | <b>DNSL--EKD</b>   | <b>PSSTIFPGLS</b>  | <b>LVQWMN</b>     | ----  | 418 |
| ZmGRMZM2G014864_P01                          | <b>GEELCKKDPQ</b>  | <b>TQNTIMPGLS</b>  | <b>LV-WMN</b>     | ----  | 323 |
| ARF5_AT1G19850                               | <b>PDS-----</b>    | <b>-ANGIMPYAS</b>  | <b>FPSMASEQLM</b> | 446   |     |
| Selmo1_437944_estExt_fgenes2_pg.C_10526      | <b>SAQAMHMRAL</b>  | <b>QGSHALGMPSS</b> | <b>KEEGERGSS</b>  | 435   |     |
| all_Phypha_77324                             | -----              | <b>PFQSN</b>       | -----             | ----- | 693 |
| all_Phypha_159688                            | <b>SI-----</b>     | <b>PRRANVFR</b>    | <b>TERFLYGSFI</b> | 560   |     |
| all_Phypha_225990                            | -----              | -----              | -----             | ----- | 372 |
| all_Phypha_171197                            | -----              | -----              | -----             | ----- | 783 |
| Pt179921_gw1.I.8521.1                        | -----              | -----              | -----             | ----- | 358 |
| Pt245007gw1.XIV.1750.1                       | -----              | -----              | -----             | ----- | 363 |
| ARF9_AT4G23980                               | -----              | -----              | -----             | ----- | 368 |
| ARF11_AT2G46530                              | -----              | -----              | -----             | ----- | 375 |
| ARF18_AT3G61830                              | -----              | -----              | -----             | ----- | 380 |
| ARF1_AT1G59750                               | <b>--PATG-PSG</b>  | -----              | -----             | ----- | 384 |
| ZmGRMZM2G017187_P02                          | <b>--MVSELPSSG</b> | -----              | -----             | ----- | 391 |
| ARF2_AT5G62000                               | <b>PLPASGLSRV</b>  | <b>LQGQEYS</b>     | -----             | ----- | 449 |
| ZmGRMZM2G006042_P01                          | <b>S-QQNNLPRA</b>  | <b>LHNQGR</b>      | -----             | ----- | 430 |
| Pt179307_gw1.I.7907.1                        | -----              | -----              | -----             | ----- | 356 |
| ARF21_AT1G34410                              | -----              | -----              | -----             | ----- | 369 |
| ARF20_AT1G35240                              | -----              | -----              | -----             | ----- | 367 |
| ARF22_AT1G34390                              | -----              | -----              | -----             | ----- | 367 |
| ARF12_AT1G34310                              | -----              | -----              | -----             | ----- | 369 |
| ARF15_AT1G35520                              | -----              | -----              | -----             | ----- | 374 |
| ARF14_AT1G35540                              | -----              | -----              | -----             | ----- | 369 |
| ARF13_AT1G34170                              | -----              | -----              | -----             | ----- | 369 |
| ARF4_AT5G60450                               | -----              | -----              | -----             | ----- | 419 |
| ARF3_AT2G33860                               | -----              | -----              | -----             | ----- | 403 |
| Pt243681_gw1.XIV.424.1                       | -----              | -----              | -----             | ----- | 288 |
| Selmo1_2_61688                               | -----              | -----              | -----             | ----- | 386 |
| Selmo1_2_51695                               | -----              | -----              | -----             | ----- | 408 |
| Phypha_108888                                | -----              | -----              | -----             | ----- | 381 |
| ARF10_AT2G28350                              | -----              | -----              | -----             | ----- | 398 |
| ARF16_AT4G30080                              | -----              | -----              | -----             | ----- | 401 |
| Phypha_61245                                 | -----              | -----              | -----             | ----- | 228 |
| ZmGRMZM2G005284_P01                          | -----              | -----              | -----             | ----- | 403 |
| ARF17_AT1G77850                              | -----              | -----              | -----             | ----- | 393 |
| Phypha_170581                                | -----              | -----              | -----             | ----- | 618 |
| all_Phypha_171888                            | -----              | -----              | -----             | ----- | 689 |
| Selmo1_2_405821                              | -----              | -----              | -----             | ----- | 146 |
| Selmo1_2_431298                              | -----              | -----              | -----             | ----- | 276 |
| Selmo1_2_431277                              | -----              | -----              | -----             | ----- | 17  |
| corb_UMD_Coleochaete_c9703_c_s_1             | -----              | -----              | -----             | ----- | 38  |
| spra_Contig219_1                             | -----              | -----              | -----             | ----- | 284 |
| IAA12_AT1G04550                              | -----              | -----              | -----             | ----- | 125 |

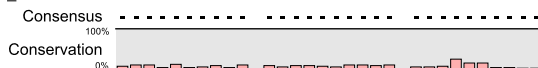

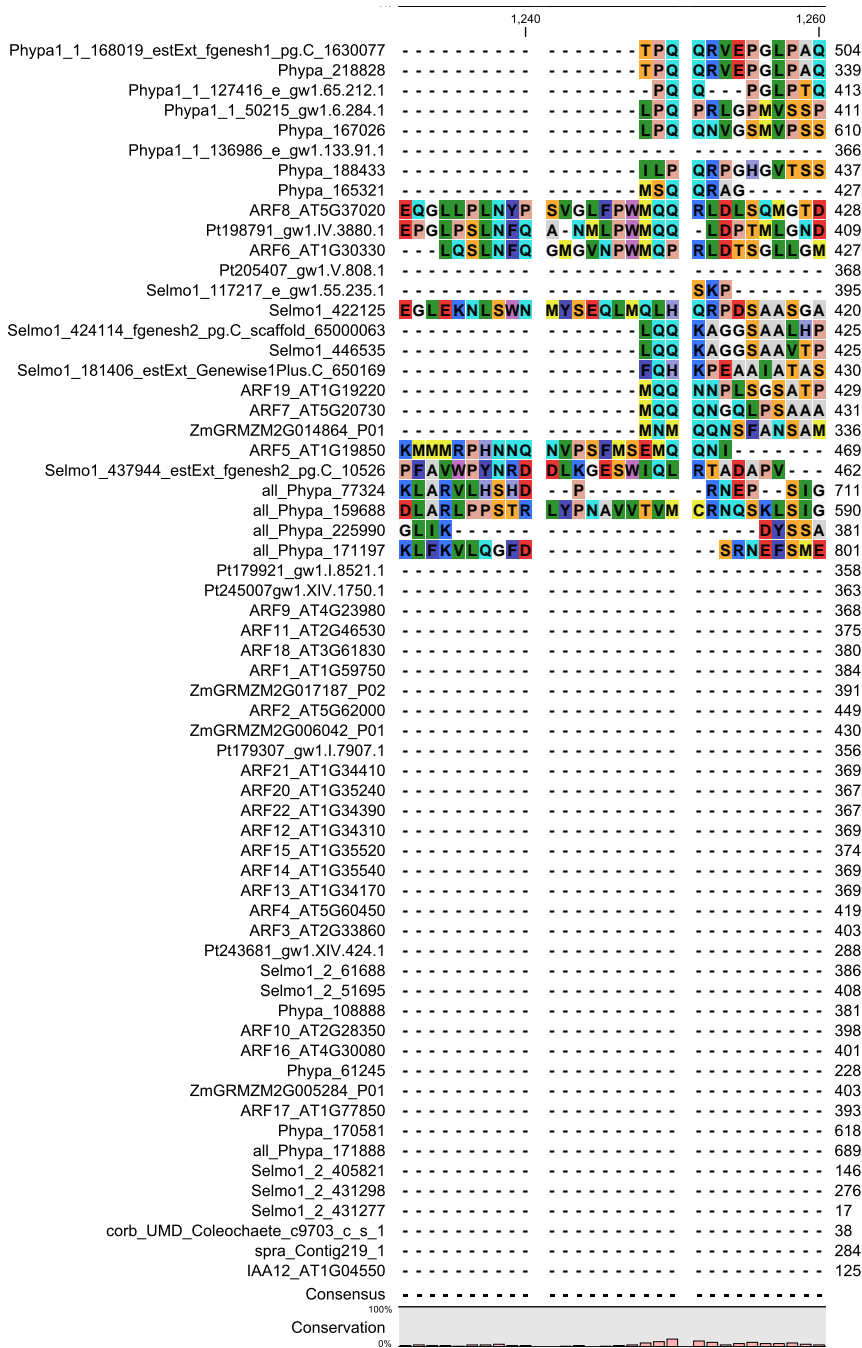

|                                              |              |               |            |     |
|----------------------------------------------|--------------|---------------|------------|-----|
| Phypha1_1_168019_estExt_fgenes1_pg.C_1630077 | QNEYYRAFAA   | A - A LQEIRCS | DASKHAMSHA | 533 |
| Phypha_218828                                | QNEYYRAFAA   | A - A LQEIRCS | DASKHAMSHA | 368 |
| Phypha1_1_127416_e_gw1.65.212.1              | QNEYYRAFAA   | A - A LQEFRTF | DCSKHPTSR  | 442 |
| Phypha1_1_50215_gw1.6.284.1                  | QSGYYRAFAA   | A - A LQEIRSV | DPPTQLLPQ  | 439 |
| Phypha_167026                                | QNEQYRAFAA   | A - A LQEIRTA | DSSKQLLAQ  | 638 |
| Phypha1_1_136986_e_gw1.133.91.1              | -----        | -----         | -----      | 366 |
| Phypha_188433                                | LNENRTLAA    | A - ASQEFR    | EPSKQVTE   | 463 |
| Phypha_165321                                | NEYYRTFAA    | ATA LQEFR     | DPSKQVTD   | 453 |
| ARF8_AT5G37020                               | NNQQYQAMLA   | A - G LQNIIGG | DPLRQ      | 452 |
| Pt198791_gw1.IV.3880.1                       | HNQRYQAMLA   | A - G MQLGSG  | DPLRQ      | 433 |
| ARF6_AT1G30330                               | QNDVYQAMAA   | A - A LQDMRG  | DPAKAAASLL | 456 |
| Pt205407_gw1.V.808.1                         | -----        | -----         | -----      | 368 |
| Selmo1_117217_e_gw1.55.235.1                 | -----        | -----         | -----      | 395 |
| Selmo1_422125                                | RSDFFRPDBC   | SRVQDATHSQ    | TPKGLPMQQ  | 450 |
| Selmo1_424114_fgenes2_pg.C_scaffold_6500063  | P            | -----         | -----      | 426 |
| Selmo1_446535                                | PPPYIQPGYY   | SSLQEMRT      | DATPKQLMQS | 455 |
| Selmo1_181406_estExt_Genewise1Plus.C_650169  | QPDYR - AMA  | AQA LQEFRSV   | DSAKQQHQQQ | 459 |
| ARF19_AT1G19220                              | Q - - LPSALS | - SF          | -----      | 438 |
| ARF7_AT5G20730                               | QPGFFPSMLS   | PTA           | -----      | 444 |
| ZmGRMZM2G014864_P01                          | QSEYLRSLSN   | PNM           | -----      | 349 |
| ARF5_AT1G19850                               | -----        | -----         | -----      | 469 |
| Selmo1_437944_estExt_fgenes2_pg.C_10526      | -----        | -----         | -----      | 462 |
| all_Phypha_77324                             | DDDDGDAESS   | RTSSLVVKQE    | PPPRN      | 736 |
| all_Phypha_159688                            | DDDDGDIESS   | RTSSLAVKQE    | QPPRT      | 615 |
| all_Phypha_225990                            | PWSDFSGLC    | -             | PSNRTGASF  | 399 |
| all_Phypha_171197                            | DEEDEDVVCSS  | RNTSWNVKPE    | PPPKTVPQAM | 831 |
| Pt179921_gw1.I.8521.1                        | -----        | -----         | -----      | 358 |
| Pt245007gw1.XIV.1750.1                       | -----        | -----         | -----      | 363 |
| ARF9_AT4G23980                               | -----        | -----         | -----      | 368 |
| ARF11_AT2G46530                              | -----        | -----         | -----      | 375 |
| ARF18_AT3G61830                              | -----        | -----         | -----      | 380 |
| ARF1_AT1G59750                               | -----        | -----         | -----      | 384 |
| ZmGRMZM2G017187_P02                          | -----        | -----         | -----      | 391 |
| ARF2_AT5G62000                               | -----        | -----         | -----      | 449 |
| ZmGRMZM2G006042_P01                          | -----        | -----         | -----      | 430 |
| Pt179307_gw1.I.7907.1                        | -----        | -----         | -----      | 356 |
| ARF21_AT1G34410                              | -----        | -----         | -----      | 369 |
| ARF20_AT1G35240                              | -----        | -----         | -----      | 367 |
| ARF22_AT1G34390                              | -----        | -----         | -----      | 367 |
| ARF12_AT1G34310                              | -----        | -----         | -----      | 369 |
| ARF15_AT1G35520                              | -----        | -----         | -----      | 374 |
| ARF14_AT1G35540                              | -----        | -----         | -----      | 369 |
| ARF13_AT1G34170                              | -----        | -----         | -----      | 369 |
| ARF4_AT5G60450                               | -----        | -----         | -----      | 419 |
| ARF3_AT2G33860                               | -----        | -----         | -----      | 403 |
| Pt243681_gw1.XIV.424.1                       | -----        | -----         | -----      | 288 |
| Selmo1_2_61688                               | -----        | -----         | -----      | 386 |
| Selmo1_2_51695                               | -----        | -----         | -----      | 408 |
| Phypha_108888                                | -----        | -----         | -----      | 381 |
| ARF10_AT2G28350                              | -----        | -----         | -----      | 398 |
| ARF16_AT4G30080                              | -----        | -----         | -----      | 401 |
| Phypha_61245                                 | -----        | -----         | -----      | 228 |
| ZmGRMZM2G005284_P01                          | -----        | -----         | -----      | 403 |
| ARF17_AT1G77850                              | -----        | -----         | -----      | 393 |
| Phypha_170581                                | -----        | -----         | -----      | 618 |
| all_Phypha_171888                            | -----        | -----         | -----      | 689 |
| Selmo1_2_405821                              | -----        | -----         | -----      | 146 |
| Selmo1_2_431298                              | -----        | -----         | -----      | 276 |
| Selmo1_2_431277                              | -----        | -----         | -----      | 17  |
| corb_UMD_Coleochaete_c9703_c_s_1             | -----        | -----         | -----      | 38  |
| spra_Contig219_1                             | -----        | -----         | -----      | 284 |
| IAA12_AT1G04550                              | -----        | -----         | -----      | 125 |

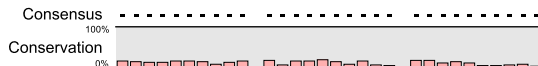

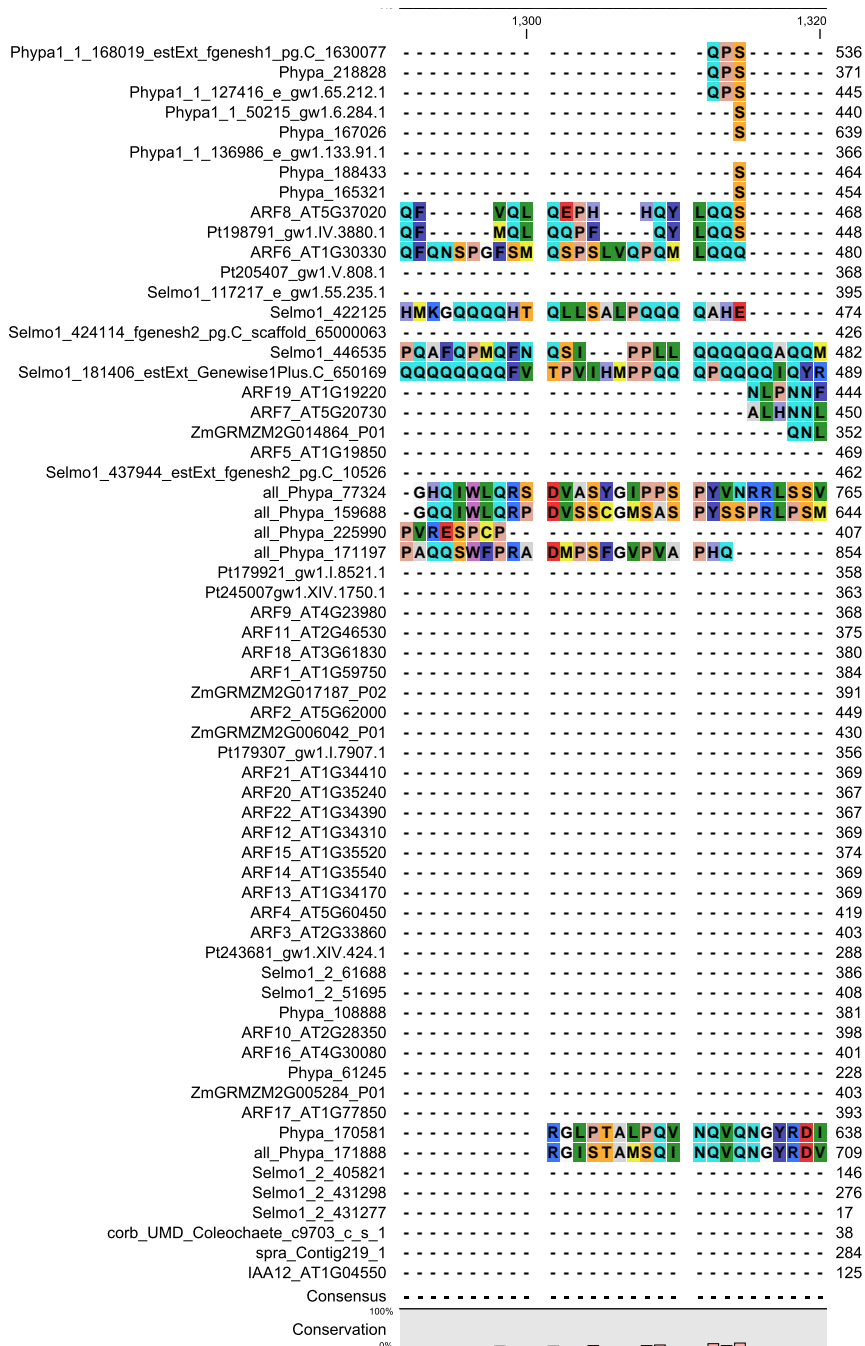



|                                              | 1,340                                 |     |
|----------------------------------------------|---------------------------------------|-----|
| Phypa1_1_168019_estExt_fgenes1_pg.C_1630077  | -----                                 | 536 |
| Phypa_218828                                 | -----                                 | 371 |
| Phypa1_1_127416_e_gw1.65.212.1               | -----                                 | 445 |
| Phypa1_1_50215_gw1.6.284.1                   | -----                                 | 440 |
| Phypa_167026                                 | -----                                 | 639 |
| Phypa1_1_136986_e_gw1.133.91.1               | -----                                 | 366 |
| Phypa_188433                                 | -----                                 | 464 |
| Phypa_165321                                 | -----                                 | 454 |
| ARF8_AT5G37020                               | -----                                 | 468 |
| Pt198791_gw1.IV.3880.1                       | -----                                 | 448 |
| ARF6_AT1G30330                               | -----                                 | 480 |
| Pt205407_gw1.V.808.1                         | -----                                 | 368 |
| Selmo1_117217_e_gw1.55.235.1                 | -----                                 | 395 |
| Selmo1_422125                                | -----                                 | 474 |
| Selmo1_424114_fgenes2_pg.C_scaffold_65000063 | -----                                 | 426 |
| Selmo1_446535                                | MHLPNVPEA ASMHAP - - - YIPAAKTPP      | 508 |
| Selmo1_181406_estExt_Genewise1Plus.C_650169  | SQIPQQ - - QV LQSHPPQQP FQPQQQQQQ     | 517 |
| ARF19_AT1G19220                              | A - SNDPSKLL NFGSPN - - LS SANSQFNKPN | 471 |
| ARF7_AT5G20730                               | GGTDDPSKLL SFQTPHGG S SSSLQFNKQN      | 480 |
| ZmGRMZM2G014864_P01                          | GWA - DLSRQL NLQN - - - QLLQQN        | 371 |
| ARF5_AT1G19850                               | ----- VM GNGGLGDMM QQPMMNQKS          | 491 |
| Selmo1_437944_estExt_fgenes2_pg.C_10526      | -----                                 | 462 |
| all_Phypa_77324                              | PPFAAPLPEN TTELQLSVNS GSLDQAPSNE      | 795 |
| all_Phypa_159688                             | APFA - PLPAD KTDLQLSVKS GSLDQTLSD     | 673 |
| all_Phypa_225990                             | ----- SINP S                          | 612 |
| all_Phypa_171197                             | PLISPRVPSE NMNLQLSVNP ASSEQAPGND      | 884 |
| Pt179921_gw1.I.8521.1                        | -----                                 | 358 |
| Pt245007gw1.XIV.1750.1                       | -----                                 | 363 |
| ARF9_AT4G23980                               | -----                                 | 368 |
| ARF11_AT2G46530                              | -----                                 | 375 |
| ARF18_AT3G61830                              | -----                                 | 380 |
| ARF1_AT1G59750                               | -----                                 | 384 |
| ZmGRMZM2G017187_P02                          | -----                                 | 391 |
| ARF2_AT5G62000                               | -----                                 | 449 |
| ZmGRMZM2G006042_P01                          | -----                                 | 430 |
| Pt179307_gw1.I.7907.1                        | -----                                 | 356 |
| ARF21_AT1G34410                              | -----                                 | 369 |
| ARF20_AT1G35240                              | -----                                 | 367 |
| ARF22_AT1G34390                              | -----                                 | 367 |
| ARF12_AT1G34310                              | -----                                 | 369 |
| ARF15_AT1G35520                              | -----                                 | 374 |
| ARF14_AT1G35540                              | -----                                 | 369 |
| ARF13_AT1G34170                              | -----                                 | 369 |
| ARF4_AT5G60450                               | -----                                 | 419 |
| ARF3_AT2G33860                               | -----                                 | 403 |
| Pt243681_gw1.XIV.424.1                       | -----                                 | 288 |
| Selmo1_2_61688                               | -----                                 | 386 |
| Selmo1_2_51695                               | -----                                 | 408 |
| Phypa_108888                                 | -----                                 | 381 |
| ARF10_AT2G28350                              | -----                                 | 398 |
| ARF16_AT4G30080                              | -----                                 | 401 |
| Phypa_61245                                  | -----                                 | 228 |
| ZmGRMZM2G005284_P01                          | -----                                 | 403 |
| ARF17_AT1G77850                              | -----                                 | 393 |
| Phypa_170581                                 | MLDQDLKQEV CGSPSNMVGK VLPAAHTDLQG     | 668 |
| all_Phypa_171888                             | LPDQDLRQQV CGSSSNMMGK VLPVQTDPPG      | 739 |
| Selmo1_2_405821                              | -----                                 | 146 |
| Selmo1_2_431298                              | -----                                 | 276 |
| Selmo1_2_431277                              | -----                                 | 17  |
| corb_UMD_Coleochaete_c9703_c_s_1             | -----                                 | 38  |
| spra_Contig219_1                             | -----                                 | 284 |
| IAA12_AT1G04550                              | -----                                 | 125 |
| Consensus                                    | -----                                 |     |
| Conservation                                 | -----                                 |     |

|                                             | 1,360      |            | 1,380      |     |
|---------------------------------------------|------------|------------|------------|-----|
| Phypa1_1_168019_estExt_fgenes1_pg.C_1630077 | -----      | -----      | -----      | 536 |
| Phypa_218828                                | -----      | -----      | -----      | 371 |
| Phypa1_1_127416_e_gw1.65.212.1              | -----      | -----      | -----      | 445 |
| Phypa1_1_50215_gw1.6.284.1                  | -----      | -----      | -----      | 440 |
| Phypa_167026                                | -----      | -----      | -----      | 639 |
| Phypa1_1_136986_e_gw1.133.91.1              | -----      | -----      | -----      | 366 |
| Phypa_188433                                | -----      | -----      | -----      | 464 |
| Phypa_165321                                | -----      | -----      | -----      | 454 |
| ARF8_AT5G37020                              | -----      | -----      | -----      | 468 |
| Pt198791_gw1.IV.3880.1                      | -----      | -----      | -----      | 448 |
| ARF6_AT1G30330                              | -----      | -----      | -----      | 480 |
| Pt205407_gw1.V.808.1                        | -----      | -----      | -----      | 368 |
| Selmo1_117217_e_gw1.55.235.1                | -----      | -----      | -----      | 395 |
| Selmo1_422125                               | -----      | -----      | -----      | 474 |
| Selmo1_424114_fgenes2_pg.C_scaffold_6500063 | -----      | RNA        | -----      | 429 |
| Selmo1_446535                               | DQEVNRNSNS | YPLLIEDGV  | SYTSMIQGSA | 538 |
| Selmo1_181406_estExt_Genewise1Plus.C_650169 | QQHHQQQQQ  | QSSHQQQQQ  | HHHHQQHRQ  | 547 |
| ARF19_AT1G19220                             | TWNHISQQMA | QPAMVKSQQQ | QQQQ       | 495 |
| ARF7_AT5G20730                              | QAP--MSQLP | QPPTLSQQQ  | QLQLLHSSL  | 508 |
| ZmGRMZM2G014864_P01                         | SIQFSPPKLP | QQMQLANEIS | KASLPINQIV | 401 |
| ARF5_AT1G19850                              | EMVQPQNKLT | VNPSASNTSG | QEQNSQSMS  | 521 |
| Selmo1_437944_estExt_fgenes2_pg.C_10526     | -----      | -----      | -----      | 462 |
| all_Phypa_77324                             | DSSVSWASYM | GTG----AY  | QFRDPSCNKI | 820 |
| all_Phypa_159688                            | VSSVSCAPVY | GPGNHSTAAH | HEREPSCNKI | 703 |
| all_Phypa_225990                            | -----      | -----      | -----      | 412 |
| all_Phypa_171197                            | HSSASWSDFS | G-----     | GC         | 898 |
| Pt179921_gw1.I.8521.1                       | -----      | -----      | -----      | 358 |
| Pt245007gw1.XIV.1750.1                      | -----      | -----      | -----      | 363 |
| ARF9_AT4G23980                              | -----      | -----      | -----      | 368 |
| ARF11_AT2G46530                             | -----      | -----      | -----      | 375 |
| ARF18_AT3G61830                             | -----      | -----      | -----      | 380 |
| ARF1_AT1G59750                              | -----      | -----      | -----      | 384 |
| ZmGRMZM2G017187_P02                         | -----      | -----      | -----      | 391 |
| ARF2_AT5G62000                              | -----      | -----      | -----      | 449 |
| ZmGRMZM2G006042_P01                         | -----      | -----      | -----      | 430 |
| Pt179307_gw1.I.7907.1                       | -----      | -----      | -----      | 356 |
| ARF21_AT1G34410                             | -----      | -----      | -----      | 369 |
| ARF20_AT1G35240                             | -----      | -----      | -----      | 367 |
| ARF22_AT1G34390                             | -----      | -----      | -----      | 367 |
| ARF12_AT1G34310                             | -----      | -----      | -----      | 369 |
| ARF15_AT1G35520                             | -----      | -----      | -----      | 374 |
| ARF14_AT1G35540                             | -----      | -----      | -----      | 369 |
| ARF13_AT1G34170                             | -----      | -----      | -----      | 369 |
| ARF4_AT5G60450                              | -----      | -----      | -----      | 419 |
| ARF3_AT2G33860                              | -----      | -----      | -----      | 403 |
| Pt243681_gw1.XIV.424.1                      | -----      | -----      | -----      | 288 |
| Selmo1_2_61688                              | -----      | -----      | -----      | 386 |
| Selmo1_2_51695                              | -----      | -----      | -----      | 408 |
| Phypa_108888                                | -----      | -----      | -----      | 381 |
| ARF10_AT2G28350                             | -----      | -----      | -----      | 398 |
| ARF16_AT4G30080                             | -----      | -----      | -----      | 401 |
| Phypa_61245                                 | -----      | -----      | -----      | 228 |
| ZmGRMZM2G005284_P01                         | -----      | -----      | -----      | 403 |
| ARF17_AT1G77850                             | -----      | -----      | -----      | 393 |
| Phypa_170581                                | RRFLQGNNFS | APSSSGGDIN | LSSTVMNGAF | 698 |
| all_Phypa_171888                            | RKFLQGNNFS | ATSSSGGDMS | SNSTMINGAF | 769 |
| Selmo1_2_405821                             | -----      | -----      | -----      | 146 |
| Selmo1_2_431298                             | -----      | -----      | -----      | 276 |
| Selmo1_2_431277                             | -----      | -----      | -----      | 17  |
| corb_UMD_Coleochaete_c9703_c_s_1            | -----      | -----      | -----      | 38  |
| spra_Contig219_1                            | -----      | -----      | -----      | 284 |
| IAA12_AT1G04550                             | -----      | -----      | -----      | 125 |
| Consensus                                   | -----      | -----      | -----      |     |
| Conservation                                | -----      | -----      | -----      |     |

|                                              | 1,400 |     |
|----------------------------------------------|-------|-----|
| Phypa1_1_168019_estExt_fgenes1_pg.C_1630077  | ----- | 536 |
| Phypa_218828                                 | ----- | 371 |
| Phypa1_1_127416_e_gw1.65.212.1               | ----- | 445 |
| Phypa1_1_50215_gw1.6.284.1                   | ----- | 440 |
| Phypa_167026                                 | ----- | 639 |
| Phypa1_1_136986_e_gw1.133.91.1               | ----- | 366 |
| Phypa_188433                                 | ----- | 464 |
| Phypa_165321                                 | ----- | 454 |
| ARF8_AT5G37020                               | ----- | 468 |
| Pt198791_gw1.IV.3880.1                       | ----- | 448 |
| ARF6_AT1G30330                               | ----- | 480 |
| Pt205407_gw1.V.808.1                         | ----- | 368 |
| Selmo1_117217_e_gw1.55.235.1                 | ----- | 395 |
| Selmo1_422125                                | ----- | 474 |
| Selmo1_424114_fgenes2_pg.C_scaffold.65000063 | ----- | 432 |
| Selmo1_446535                                | ----- | 564 |
| Selmo1_181406_estExt_Genewise1Plus.C_650169  | ----- | 577 |
| ARF19_AT1G19220                              | ----- | 523 |
| ARF7_AT5G20730                               | ----- | 537 |
| ZmGRMZM2G014864_P01                          | ----- | 431 |
| ARF5_AT1G19850                               | ----- | 551 |
| Selmo1_437944_estExt_fgenes2_pg.C_10526      | ----- | 462 |
| all_Phypa_77324                              | ----- | 847 |
| all_Phypa_159688                             | ----- | 733 |
| all_Phypa_225990                             | ----- | 431 |
| all_Phypa_171197                             | ----- | 921 |
| Pt179921_gw1.I.8521.1                        | ----- | 358 |
| Pt245007gw1.XIV.1750.1                       | ----- | 363 |
| ARF9_AT4G23980                               | ----- | 368 |
| ARF11_AT2G46530                              | ----- | 375 |
| ARF18_AT3G61830                              | ----- | 380 |
| ARF1_AT1G59750                               | ----- | 384 |
| ZmGRMZM2G017187_P02                          | ----- | 391 |
| ARF2_AT5G62000                               | ----- | 449 |
| ZmGRMZM2G006042_P01                          | ----- | 430 |
| Pt179307_gw1.I.7907.1                        | ----- | 356 |
| ARF21_AT1G34410                              | ----- | 369 |
| ARF20_AT1G35240                              | ----- | 367 |
| ARF22_AT1G34390                              | ----- | 367 |
| ARF12_AT1G34310                              | ----- | 369 |
| ARF15_AT1G35520                              | ----- | 374 |
| ARF14_AT1G35540                              | ----- | 369 |
| ARF13_AT1G34170                              | ----- | 369 |
| ARF4_AT5G60450                               | ----- | 419 |
| ARF3_AT2G33860                               | ----- | 403 |
| Pt243681_gw1.XIV.424.1                       | ----- | 288 |
| Selmo1_2_61688                               | ----- | 386 |
| Selmo1_2_51695                               | ----- | 408 |
| Phypa_108888                                 | ----- | 381 |
| ARF10_AT2G28350                              | ----- | 398 |
| ARF16_AT4G30080                              | ----- | 401 |
| Phypa_61245                                  | ----- | 228 |
| ZmGRMZM2G005284_P01                          | ----- | 403 |
| ARF17_AT1G77850                              | ----- | 393 |
| Phypa_170581                                 | ----- | 715 |
| all_Phypa_171888                             | ----- | 786 |
| Selmo1_2_405821                              | ----- | 146 |
| Selmo1_2_431298                              | ----- | 276 |
| Selmo1_2_431277                              | ----- | 17  |
| corb_UMD_Coleochaete_c9703_c_s_1             | ----- | 38  |
| spra_Contig219_1                             | ----- | 284 |
| IAA12_AT1G04550                              | ----- | 125 |
| Consensus                                    | ----- |     |
| Conservation                                 | ----- |     |

|                                              | 1,420               | 1,440               |                     |     |
|----------------------------------------------|---------------------|---------------------|---------------------|-----|
| Phypa1_1_168019_estExt_fgenes1_pg.C_1630077  | -----               | -----               | 536                 |     |
| Phypa_218828                                 | -----               | -----               | 371                 |     |
| Phypa1_1_127416_e_gw1.65.212.1               | -----               | -----               | 445                 |     |
| Phypa1_1_50215_gw1.6.284.1                   | -----               | -----               | 440                 |     |
| Phypa_167026                                 | -----               | -----               | 639                 |     |
| Phypa1_1_136986_e_gw1.133.91.1               | -----               | -----               | 366                 |     |
| Phypa_188433                                 | -----               | -----               | 464                 |     |
| Phypa_165321                                 | -----               | -----               | 454                 |     |
| ARF8_AT5G37020                               | -----               | -----               | 468                 |     |
| Pt198791_gw1.IV.3880.1                       | -----               | -----               | 448                 |     |
| ARF6_AT1G30330                               | -----               | -----               | 480                 |     |
| Pt205407_gw1.V.808.1                         | -----               | -----               | 368                 |     |
| Selmo1_117217_e_gw1.55.235.1                 | -----               | -----               | 395                 |     |
| Selmo1_422125                                | -----               | -----               | 474                 |     |
| Selmo1_424114_fgenes2_pg.C_scaffold_65000063 | -----               | -----               | 432                 |     |
| Selmo1_446535                                | -----               | -----               | 564                 |     |
| Selmo1_181406_estExt_Genewise1Plus.C_650169  | S Y Q L Q V P A S L | Q Q T V P L A S R   | T P G F S E D S G A | 607 |
| ARF19_AT1G19220                              | I Y N N G T I A W A | N Q V S C Q S P N Q | P T G F S Q S Q L Q | 553 |
| ARF7_AT5G20730                               | H S N N - - - - -   | N Q S Q S Q Q Q Q Q | L L Q Q Q Q Q Q Q Q | 561 |
| ZmGRMZM2G014864_P01                          | Q T N L Y Q A Q V L | I Q N Q M Q Q Q K Q | P T S M A Q N Q Q Q | 460 |
| ARF5_AT1G19850                               | Q W T T S T V C N E | K V N Q L L Q K P G | A S S P V Q A D Q C | 581 |
| Selmo1_437944_estExt_fgenes2_pg.C_10526      | -----               | - - M D M F G N I I | A P A G R H M D S S | 480 |
| all_Phypa_77324                              | S L N N D - - P K V | L H A H N L - S F E | L W E T V E Q E Q L | 874 |
| all_Phypa_159688                             | S L N N D - - P K L | T P A Q N L - S F G | S W D K V E Q E K V | 760 |
| all_Phypa_225990                             | S L H S E S A P E M | L P P Q A V P A F E | V R D K A Q L E K V | 461 |
| all_Phypa_171197                             | S L N N E S A S K M | L P P Q V I P P F E | A R D K V E L V K L | 951 |
| Pt179921_gw1.I.8521.1                        | -----               | -----               | 358                 |     |
| Pt245007gw1.XIV.1750.1                       | -----               | -----               | 363                 |     |
| ARF9_AT4G23980                               | -----               | -----               | 368                 |     |
| ARF11_AT2G46530                              | -----               | -----               | 375                 |     |
| ARF18_AT3G61830                              | -----               | -----               | 380                 |     |
| ARF1_AT1G59750                               | -----               | -----               | 384                 |     |
| ZmGRMZM2G017187_P02                          | -----               | -----               | 391                 |     |
| ARF2_AT5G62000                               | -----               | -----               | 449                 |     |
| ZmGRMZM2G006042_P01                          | -----               | -----               | 430                 |     |
| Pt179307_gw1.I.7907.1                        | -----               | -----               | 356                 |     |
| ARF21_AT1G34410                              | -----               | -----               | 369                 |     |
| ARF20_AT1G35240                              | -----               | -----               | 367                 |     |
| ARF22_AT1G34390                              | -----               | -----               | 367                 |     |
| ARF12_AT1G34310                              | -----               | -----               | 369                 |     |
| ARF15_AT1G35520                              | -----               | -----               | 374                 |     |
| ARF14_AT1G35540                              | -----               | -----               | 369                 |     |
| ARF13_AT1G34170                              | -----               | -----               | 369                 |     |
| ARF4_AT5G60450                               | -----               | -----               | 419                 |     |
| ARF3_AT2G33860                               | -----               | -----               | 403                 |     |
| Pt243681_gw1.XIV.424.1                       | -----               | -----               | 288                 |     |
| Selmo1_2_61688                               | -----               | -----               | 386                 |     |
| Selmo1_2_51695                               | -----               | -----               | 408                 |     |
| Phypa_108888                                 | -----               | -----               | 381                 |     |
| ARF10_AT2G28350                              | -----               | -----               | 398                 |     |
| ARF16_AT4G30080                              | -----               | -----               | 401                 |     |
| Phypa_61245                                  | -----               | -----               | 228                 |     |
| ZmGRMZM2G005284_P01                          | -----               | -----               | 403                 |     |
| ARF17_AT1G77850                              | -----               | -----               | 393                 |     |
| Phypa_170581                                 | -----               | -----               | 715                 |     |
| all_Phypa_171888                             | -----               | -----               | 786                 |     |
| Selmo1_2_405821                              | -----               | -----               | 146                 |     |
| Selmo1_2_431298                              | -----               | -----               | 276                 |     |
| Selmo1_2_431277                              | -----               | -----               | 17                  |     |
| corb_UMD_Coleochaete_c9703_c_s_1             | -----               | -----               | 38                  |     |
| spra_Contig219_1                             | -----               | -----               | 284                 |     |
| IAA12_AT1G04550                              | -----               | -----               | 125                 |     |
| Consensus                                    | -----               | -----               | -----               |     |
| Conservation                                 | -----               | -----               | -----               |     |

|                                              |                                                                                           |                                                                                           |                                                                                                    |     |
|----------------------------------------------|-------------------------------------------------------------------------------------------|-------------------------------------------------------------------------------------------|----------------------------------------------------------------------------------------------------|-----|
| Phypa1_1_168019_estExt_fgenes1_pg.C_1630077  | -----                                                                                     | -----                                                                                     | -----                                                                                              | 536 |
| Phypa_218828                                 | -----                                                                                     | -----                                                                                     | -----                                                                                              | 371 |
| Phypa1_1_127416_e_gw1.65.212.1               | -----                                                                                     | -----                                                                                     | -----                                                                                              | 445 |
| Phypa1_1_50215_gw1.6.284.1                   | -----                                                                                     | -----                                                                                     | -----                                                                                              | 440 |
| Phypa_167026                                 | -----                                                                                     | -----                                                                                     | -----                                                                                              | 639 |
| Phypa1_1_136986_e_gw1.133.91.1               | -----                                                                                     | -----                                                                                     | -----                                                                                              | 366 |
| Phypa_188433                                 | -----                                                                                     | -----                                                                                     | -----                                                                                              | 464 |
| Phypa_165321                                 | -----                                                                                     | -----                                                                                     | -----                                                                                              | 454 |
| ARF8_AT5G37020                               | -----                                                                                     | -----                                                                                     | -----                                                                                              | 468 |
| Pt198791_gw1.IV.3880.1                       | -----                                                                                     | -----                                                                                     | -----                                                                                              | 448 |
| ARF6_AT1G30330                               | -----                                                                                     | -----                                                                                     | -----                                                                                              | 480 |
| Pt205407_gw1.V.808.1                         | -----                                                                                     | -----                                                                                     | -----                                                                                              | 368 |
| Selmo1_117217_e_gw1.55.235.1                 | -----                                                                                     | -----                                                                                     | -----                                                                                              | 395 |
| Selmo1_422125                                | -----                                                                                     | -----                                                                                     | -----                                                                                              | 474 |
| Selmo1_424114_fgenes2_pg.C_scaffold_65000063 | -----                                                                                     | -----                                                                                     | -----                                                                                              | 432 |
| Selmo1_446535                                | -----                                                                                     | -----                                                                                     | -----                                                                                              | 564 |
| Selmo1_181406_estExt_Genewise1Plus.C_650169  | <b>S</b> <b>F</b> <b>G</b> <b>S</b> <b>M</b> <b>P</b> <b>A</b> <b>N</b> <b>N</b> <b>M</b> | <b>S</b> <b>L</b> <b>Q</b> <b>S</b> <b>L</b> <b>N</b> <b>R</b> <b>S</b> <b>N</b>          | <b>P</b> <b>D</b> <b>A</b> <b>L</b> <b>L</b> <b>Q</b> <b>E</b> <b>S</b> <b>Q</b> <b>Y</b>          | 637 |
| ARF19_AT1G19220                              | <b>Q</b> <b>Q</b> <b>S</b> <b>M</b> <b>L</b> <b>P</b> <b>T</b> <b>A</b> <b>K</b> <b>M</b> | <b>T</b> <b>H</b> <b>Q</b> <b>N</b> <b>I</b> <b>N</b> <b>S</b> <b>M</b> <b>G</b> <b>N</b> | <b>K</b> <b>G</b> <b>L</b> <b>S</b> <b>Q</b> <b>M</b> <b>T</b> <b>S</b> <b>F</b> <b>A</b>          | 583 |
| ARF7_AT5G20730                               | <b>Q</b> <b>Q</b> <b>H</b> <b>Q</b> <b>Q</b> <b>P</b> <b>L</b> <b>Q</b> <b>Q</b> <b>Q</b> | <b>T</b> <b>Q</b> <b>Q</b> <b>Q</b> <b>-</b> <b>-</b> <b>Q</b> <b>L</b> <b>R</b> <b>T</b> | <b>Q</b> <b>P</b> <b>L</b> <b>-</b> <b>Q</b> <b>S</b> <b>H</b> <b>S</b> <b>H</b> <b>P</b>          | 588 |
| ZmGRMZM2G014864_P01                          | -----                                                                                     | <b>P</b> <b>A</b> <b>A</b> <b>-</b> <b>-</b>                                              | <b>-</b> <b>-</b> <b>-</b> <b>S</b> <b>Q</b> <b>S</b> <b>L</b> <b>I</b> <b>L</b> <b>P</b>          | 470 |
| ARF5_AT1G19850                               | <b>L</b> <b>D</b> <b>I</b> <b>T</b> <b>H</b> <b>Q</b> <b>I</b> <b>Y</b> <b>Q</b> <b>P</b> | <b>Q</b> <b>S</b> <b>D</b> <b>P</b> <b>I</b> <b>N</b> <b>G</b> <b>F</b> <b>S</b> <b>F</b> | <b>L</b> <b>E</b> <b>T</b> <b>D</b> <b>E</b> <b>L</b> <b>T</b> <b>S</b> <b>Q</b> <b>V</b>          | 611 |
| Selmo1_437944_estExt_fgenes2_pg.C_10526      | <b>N</b> <b>V</b> <b>E</b> <b>M</b> <b>H</b> <b>Q</b> <b>L</b> <b>R</b> <b>H</b>          | <b>C</b> <b>L</b> <b>Q</b> <b>Q</b> <b>L</b> <b>R</b> <b>D</b> <b>Q</b> <b>K</b> <b>S</b> | <b>C</b> <b>H</b> <b>F</b> <b>D</b> <b>A</b> <b>S</b> <b>N</b> <b>S</b> <b>Q</b> <b>V</b>          | 510 |
| all_Phypa_77324                              | <b>N</b> <b>A</b> <b>S</b> <b>P</b> <b>A</b> <b>L</b> <b>E</b> <b>Q</b> <b>Q</b> <b>C</b> | <b>K</b> <b>L</b> <b>F</b> <b>G</b> <b>F</b> <b>N</b> <b>L</b> <b>A</b> <b>D</b> <b>K</b> | <b>V</b> <b>V</b> <b>P</b> <b>T</b> <b>P</b> <b>V</b> <b>S</b> <b>S</b> <b>A</b> <b>P</b>          | 904 |
| all_Phypa_159688                             | <b>H</b> <b>T</b> <b>S</b> <b>P</b> <b>A</b> <b>L</b> <b>E</b> <b>Q</b> <b>Q</b> <b>C</b> | <b>K</b> <b>L</b> <b>F</b> <b>G</b> <b>F</b> <b>N</b> <b>L</b> <b>V</b> <b>D</b> <b>K</b> | <b>A</b> <b>V</b> <b>L</b> <b>A</b> <b>P</b> <b>V</b> <b>S</b> <b>S</b> <b>A</b> <b>P</b>          | 790 |
| all_Phypa_225990                             | <b>D</b> <b>T</b> <b>T</b> <b>P</b> <b>G</b> <b>L</b> <b>V</b> <b>Q</b> <b>P</b> <b>C</b> | <b>K</b> <b>L</b> <b>F</b> <b>G</b> <b>F</b> <b>N</b> <b>L</b> <b>A</b> <b>D</b> <b>K</b> | <b>I</b> <b>V</b> <b>P</b> <b>T</b> <b>A</b> <b>P</b> <b>L</b> <b>P</b> <b>P</b>                   | 491 |
| all_Phypa_171197                             | <b>R</b> <b>T</b> <b>T</b> <b>P</b> <b>A</b> <b>L</b> <b>V</b> <b>Q</b> <b>P</b> <b>C</b> | <b>K</b> <b>L</b> <b>F</b> <b>G</b> <b>F</b> <b>D</b> <b>L</b> <b>A</b> <b>D</b> <b>K</b> | <b>K</b> <b>V</b> <b>P</b> <b>S</b> <b>S</b> <b>V</b> <b>T</b> <b>L</b> <b>L</b> <b>A</b> <b>P</b> | 981 |
| Pt179921_gw1.I.8521.1                        | -----                                                                                     | -----                                                                                     | -----                                                                                              | 358 |
| Pt245007gw1.XIV.1750.1                       | -----                                                                                     | -----                                                                                     | -----                                                                                              | 363 |
| ARF9_AT4G23980                               | -----                                                                                     | -----                                                                                     | -----                                                                                              | 368 |
| ARF11_AT2G46530                              | -----                                                                                     | -----                                                                                     | -----                                                                                              | 375 |
| ARF18_AT3G61830                              | -----                                                                                     | -----                                                                                     | -----                                                                                              | 380 |
| ARF1_AT1G59750                               | -----                                                                                     | -----                                                                                     | -----                                                                                              | 384 |
| ZmGRMZM2G017187_P02                          | -----                                                                                     | -----                                                                                     | -----                                                                                              | 391 |
| ARF2_AT5G62000                               | -----                                                                                     | -----                                                                                     | -----                                                                                              | 449 |
| ZmGRMZM2G006042_P01                          | -----                                                                                     | -----                                                                                     | -----                                                                                              | 430 |
| Pt179307_gw1.I.7907.1                        | -----                                                                                     | -----                                                                                     | -----                                                                                              | 356 |
| ARF21_AT1G34410                              | -----                                                                                     | -----                                                                                     | -----                                                                                              | 369 |
| ARF20_AT1G35240                              | -----                                                                                     | -----                                                                                     | -----                                                                                              | 367 |
| ARF22_AT1G34390                              | -----                                                                                     | -----                                                                                     | -----                                                                                              | 367 |
| ARF12_AT1G34310                              | -----                                                                                     | -----                                                                                     | -----                                                                                              | 369 |
| ARF15_AT1G35520                              | -----                                                                                     | -----                                                                                     | -----                                                                                              | 374 |
| ARF14_AT1G35540                              | -----                                                                                     | -----                                                                                     | -----                                                                                              | 369 |
| ARF13_AT1G34170                              | -----                                                                                     | -----                                                                                     | -----                                                                                              | 369 |
| ARF4_AT5G60450                               | -----                                                                                     | -----                                                                                     | -----                                                                                              | 419 |
| ARF3_AT2G33860                               | -----                                                                                     | -----                                                                                     | -----                                                                                              | 403 |
| Pt243681_gw1.XIV.424.1                       | -----                                                                                     | -----                                                                                     | -----                                                                                              | 288 |
| Selmo1_2_61688                               | -----                                                                                     | -----                                                                                     | -----                                                                                              | 386 |
| Selmo1_2_51695                               | -----                                                                                     | -----                                                                                     | -----                                                                                              | 408 |
| Phypa_108888                                 | -----                                                                                     | -----                                                                                     | -----                                                                                              | 381 |
| ARF10_AT2G28350                              | -----                                                                                     | -----                                                                                     | -----                                                                                              | 398 |
| ARF16_AT4G30080                              | -----                                                                                     | -----                                                                                     | -----                                                                                              | 401 |
| Phypa_61245                                  | -----                                                                                     | -----                                                                                     | -----                                                                                              | 228 |
| ZmGRMZM2G005284_P01                          | -----                                                                                     | -----                                                                                     | -----                                                                                              | 403 |
| ARF17_AT1G77850                              | -----                                                                                     | -----                                                                                     | -----                                                                                              | 393 |
| Phypa_170581                                 | -----                                                                                     | -----                                                                                     | -----                                                                                              | 715 |
| all_Phypa_171888                             | -----                                                                                     | -----                                                                                     | -----                                                                                              | 786 |
| Selmo1_2_405821                              | -----                                                                                     | -----                                                                                     | -----                                                                                              | 146 |
| Selmo1_2_431298                              | -----                                                                                     | -----                                                                                     | -----                                                                                              | 276 |
| Selmo1_2_431277                              | -----                                                                                     | -----                                                                                     | -----                                                                                              | 17  |
| corb_UMD_Coleochaete_c9703_c_s_1             | -----                                                                                     | -----                                                                                     | -----                                                                                              | 38  |
| spra_Contig219_1                             | -----                                                                                     | -----                                                                                     | -----                                                                                              | 284 |
| IAA12_AT1G04550                              | -----                                                                                     | -----                                                                                     | -----                                                                                              | 125 |

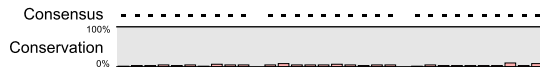

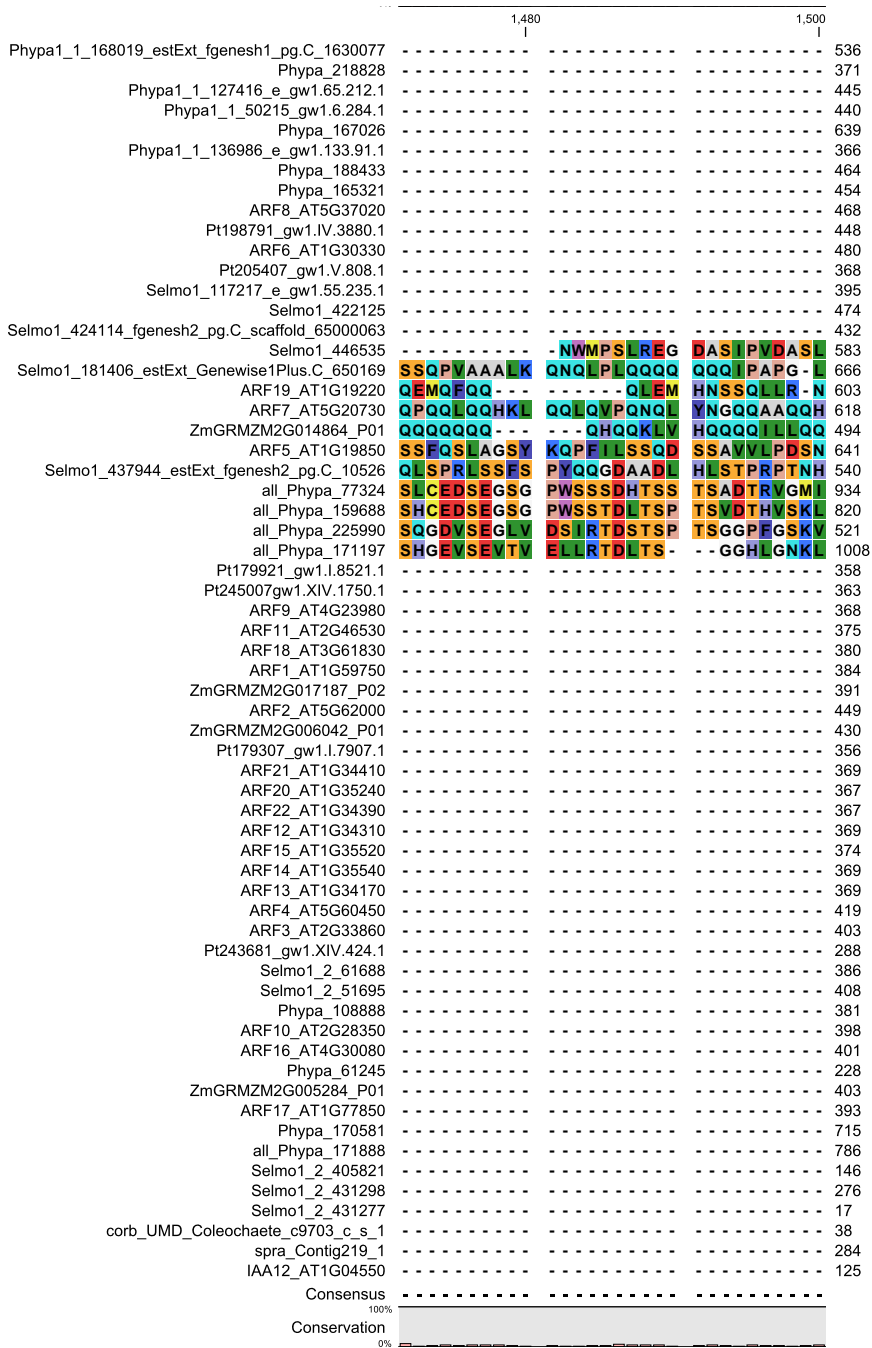

|                                              |                            |                            |                            |      |
|----------------------------------------------|----------------------------|----------------------------|----------------------------|------|
| Phypa1_1_168019_estExt_fgenes1_pg.C_1630077  | .....                      | .....                      | .....                      | 536  |
| Phypa_218828                                 | .....                      | .....                      | .....                      | 371  |
| Phypa1_1_127416_e_gw1.65.212.1               | .....                      | .....                      | .....                      | 445  |
| Phypa1_1_50215_gw1.6.284.1                   | .....                      | .....                      | .....                      | 440  |
| Phypa_167026                                 | .....                      | .....                      | .....                      | 639  |
| Phypa1_1_136986_e_gw1.133.91.1               | .....                      | .....                      | .....                      | 366  |
| Phypa_188433                                 | .....                      | .....                      | .....                      | 464  |
| Phypa_165321                                 | .....                      | .....                      | .....                      | 454  |
| ARF8_AT5G37020                               | .....                      | .....                      | .....                      | 468  |
| Pt198791_gw1.IV.3880.1                       | .....                      | .....                      | .....                      | 448  |
| ARF6_AT1G30330                               | .....                      | .....                      | .....                      | 480  |
| Pt205407_gw1.V.808.1                         | .....                      | .....                      | .....                      | 368  |
| Selmo1_117217_e_gw1.55.235.1                 | .....                      | .....                      | .....                      | 395  |
| Selmo1_422125                                | .....                      | .....                      | .....                      | 474  |
| Selmo1_424114_fgenes2_pg.C_scaffold.65000063 | .....                      | .....                      | .....                      | 432  |
| Selmo1_446535                                | <b>L P P S S S Q Q A</b>   | <b>D Q D N D P R S H V</b> | <b>L F G V N I D G Q V</b> | 613  |
| Selmo1_181406_estExt_Genewise1Plus.C_650169  | <b>L S Q E P Q L S D V</b> | <b>Q S D L R S N S H</b>   | <b>L F G V N I D S P L</b> | 696  |
| ARF19_AT1G19220                              | <b>Q Q E Q S S L H S L</b> | <b>Q Q N L</b>             | <b>S Q N</b>               | 620  |
| ARF7_AT5G20730                               | <b>Q S Q Q A S T H H L</b> | <b>Q P Q L V S G S M A</b> | <b>S S I T P P S S S L</b> | 648  |
| ZmGRMZM2G014864_P01                          | <b>Q Q</b>                 | <b>Q Q Q</b>               |                            | 500  |
| ARF5_AT1G19850                               | <b>S P L F H D V W D T</b> | <b>Q L N G L K F D Q F</b> | <b>S P L M Q Q D L Y A</b> | 671  |
| Selmo1_437944_estExt_fgenes2_pg.C_10526      | <b>G V V R D S S W L S</b> | <b>P L G P T Q T D A Q</b> | <b>A Y V A A D T T L S</b> | 570  |
| all_Phypa_77324                              | <b>V T G T Y Q</b>         |                            |                            | 940  |
| all_Phypa_159688                             | <b>A N G A Y Q</b>         |                            |                            | 826  |
| all_Phypa_225990                             | <b>A A E S S Q</b>         |                            |                            | 527  |
| all_Phypa_171197                             | <b>T A E S C Q</b>         |                            |                            | 1014 |
| Pt179921_gw1.I.8521.1                        |                            |                            |                            | 358  |
| Pt245007gw1.XIV.1750.1                       |                            |                            |                            | 363  |
| ARF9_AT4G23980                               |                            |                            |                            | 368  |
| ARF11_AT2G46530                              |                            |                            |                            | 375  |
| ARF18_AT3G61830                              |                            |                            |                            | 380  |
| ARF1_AT1G59750                               |                            |                            |                            | 384  |
| ZmGRMZM2G017187_P02                          |                            |                            |                            | 391  |
| ARF2_AT5G62000                               |                            |                            |                            | 449  |
| ZmGRMZM2G006042_P01                          |                            |                            |                            | 430  |
| Pt179307_gw1.I.7907.1                        |                            |                            |                            | 356  |
| ARF21_AT1G34410                              |                            | <b>V N E F G S S S</b>     | <b>S H L L P P I L T Q</b> | 387  |
| ARF20_AT1G35240                              |                            | <b>V N E F G</b>           |                            | 372  |
| ARF22_AT1G34390                              |                            | <b>V N E I G S S S</b>     | <b>S H L L P P I L T Q</b> | 385  |
| ARF12_AT1G34310                              |                            | <b>V N E I G S S S</b>     | <b>S H L L P P I L T Q</b> | 387  |
| ARF15_AT1G35520                              |                            | <b>V N E F G S S S</b>     | <b>S H L L P P I L T Q</b> | 392  |
| ARF14_AT1G35540                              |                            | <b>V N E I G S S S</b>     | <b>S H L L P P I L T Q</b> | 387  |
| ARF13_AT1G34170                              |                            |                            |                            | 369  |
| ARF4_AT5G60450                               |                            |                            |                            | 419  |
| ARF3_AT2G33860                               |                            |                            |                            | 403  |
| Pt243681_gw1.XIV.424.1                       |                            |                            |                            | 288  |
| Selmo1_2_61688                               |                            |                            |                            | 386  |
| Selmo1_2_51695                               |                            |                            |                            | 408  |
| Phypa_108888                                 |                            |                            |                            | 381  |
| ARF10_AT2G28350                              |                            |                            |                            | 398  |
| ARF16_AT4G30080                              |                            |                            |                            | 401  |
| Phypa_61245                                  |                            |                            |                            | 228  |
| ZmGRMZM2G005284_P01                          |                            |                            |                            | 403  |
| ARF17_AT1G77850                              |                            |                            |                            | 393  |
| Phypa_170581                                 |                            |                            |                            | 715  |
| all_Phypa_171888                             |                            |                            |                            | 786  |
| Selmo1_2_405821                              |                            |                            |                            | 146  |
| Selmo1_2_431298                              |                            |                            |                            | 276  |
| Selmo1_2_431277                              |                            |                            |                            | 17   |
| corb_UMD_Coleochaete_c9703_c_s_1             |                            |                            |                            | 38   |
| spra_Contig219_1                             |                            |                            |                            | 284  |
| IAA12_AT1G04550                              |                            |                            |                            | 125  |

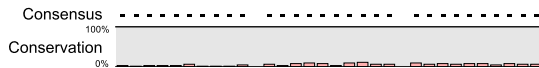

|                                              | 1,540       |            | 1,560      |      |
|----------------------------------------------|-------------|------------|------------|------|
| Phypa1_1_168019_estExt_fgenes1_pg.C_1630077  | -----       | -----      | -----      | 536  |
| Phypa_218828                                 | -----       | -----      | -----      | 371  |
| Phypa1_1_127416_e_gw1.65.212.1               | -----       | -----      | -----      | 445  |
| Phypa1_1_50215_gw1.6.284.1                   | -----       | -----      | -----      | 440  |
| Phypa_167026                                 | -----       | -----      | -----      | 639  |
| Phypa1_1_136986_e_gw1.133.91.1               | -----       | -----      | -----      | 366  |
| Phypa_188433                                 | -----       | -----      | -----      | 464  |
| Phypa_165321                                 | -----       | -----      | -----      | 454  |
| ARF8_AT5G37020                               | -----       | -----      | -----      | 468  |
| Pt198791_gw1.IV.3880.1                       | -----       | -----      | -----      | 448  |
| ARF6_AT1G30330                               | -----       | -----      | -----      | 480  |
| Pt205407_gw1.V.808.1                         | -----       | -----      | -----      | 368  |
| Selmo1_117217_e_gw1.55.235.1                 | -----       | -----      | -----      | 395  |
| Selmo1_422125                                | -----       | -----      | -----      | 474  |
| Selmo1_424114_fgenes2_pg.C_scaffold_65000063 | -----       | -----      | -----      | 432  |
| Selmo1_446535                                | PPSYAPPPFS  | KPKDFSGAQP | DIALHAAEE  | 643  |
| Selmo1_181406_estExt_Genewise1Plus.C_650169  | MSSAAAAWA   | QGFAPADKAK | DVSFSMIGSP | 726  |
| ARF19_AT1G19220                              | PQQLQMQQQS  | SKP        | -----      | 633  |
| ARF7_AT5G20730                               | NQSFQQQQQQ  | SKQLQQAHHH | LGASTSQSSV | 678  |
| ZmGRMZM2G014864_P01                          | -QQIQQQQQN  | QQQ        | -----      | 513  |
| ARF5_AT1G19850                               | SQNI CMSNST | TSNILDPPLS | NTVDDFCAL  | 701  |
| Selmo1_437944_estExt_fgenes2_pg.C_10526      | MQFSKSEMTT  | ERMHDSNPD  | HEPREHSCKI | 600  |
| all_Phypa_77324                              | -----       | -----      | -----      | 940  |
| all_Phypa_159688                             | -----       | -----      | -----      | 826  |
| all_Phypa_225990                             | -----       | -----      | -----      | 527  |
| all_Phypa_171197                             | -----       | -----      | -----      | 1014 |
| Pt179921_gw1.I.8521.1                        | -----       | -----      | -----      | 358  |
| Pt245007gw1.XIV.1750.1                       | -----       | -----      | -----      | 363  |
| ARF9_AT4G23980                               | -----       | -----      | -----      | 368  |
| ARF11_AT2G46530                              | -----       | -----      | -----      | 375  |
| ARF18_AT3G61830                              | -----       | -----      | -----      | 380  |
| ARF1_AT1G59750                               | -----       | -----      | -----      | 384  |
| ZmGRMZM2G017187_P02                          | -----       | -----      | -----      | 391  |
| ARF2_AT5G62000                               | -----       | -----      | -----      | 449  |
| ZmGRMZM2G006042_P01                          | -----       | -----      | -----      | 430  |
| Pt179307_gw1.I.7907.1                        | -----       | -----      | -----      | 356  |
| ARF21_AT1G34410                              | GQETIGQLSVA | SPM-ISLRYR | DTTEAAMNPS | 416  |
| ARF20_AT1G35240                              | -QETIGQLSVA | SPMNTSLRYR | DTTEDAMNP  | 400  |
| ARF22_AT1G34390                              | GQETIGQLSVA | SPMNI-LTYR | DTTEDVMNPS | 414  |
| ARF12_AT1G34310                              | GQENEQLSVA  | SPM-ISLRYR | DATEDAMNPS | 416  |
| ARF15_AT1G35520                              | GQETIGQLS-A | SPMNTSLRYR | ETTEDAMNPS | 421  |
| ARF14_AT1G35540                              | GQETIGQSSMA | TPM-ISLRYR | DITEDAMTPS | 416  |
| ARF13_AT1G34170                              | -----       | -----      | -----      | 369  |
| ARF4_AT5G60450                               | -----       | -----      | -----      | 419  |
| ARF3_AT2G33860                               | -----       | -----      | -----      | 403  |
| Pt243681_gw1.XIV.424.1                       | -----       | -----      | -----      | 288  |
| Selmo1_2_61688                               | -----       | -----      | -----      | 386  |
| Selmo1_2_51695                               | -----       | -----      | -----      | 408  |
| Phypa_108888                                 | -----       | -----      | -----      | 381  |
| ARF10_AT2G28350                              | -----       | -----      | -----      | 398  |
| ARF16_AT4G30080                              | -----       | -----      | -----      | 401  |
| Phypa_61245                                  | -----       | -----      | -----      | 228  |
| ZmGRMZM2G005284_P01                          | -----       | -----      | -----      | 403  |
| ARF17_AT1G77850                              | -----       | -----      | -----      | 393  |
| Phypa_170581                                 | -----       | -----      | -----      | 715  |
| all_Phypa_171888                             | -----       | -----      | -----      | 786  |
| Selmo1_2_405821                              | -----       | -----      | -----      | 146  |
| Selmo1_2_431298                              | -----       | -----      | -----      | 276  |
| Selmo1_2_431277                              | -----       | -----      | -----      | 17   |
| corb_UMD_Coleochaete_c9703_c_s_1             | -----       | -----      | -----      | 38   |
| spra_Contig219_1                             | -----       | -----      | -----      | 284  |
| IAA12_AT1G04550                              | -----       | -----      | -----      | 125  |
| Consensus                                    | -----       | -----      | -----      |      |
| Conservation                                 | 100%        | -----      | -----      |      |
|                                              | 0%          | -----      | -----      |      |



|                                             | 1     | 580   |       |
|---------------------------------------------|-------|-------|-------|
| Phypa1_1_168019_estExt_fgenes1_pg.C_1630077 | ..... | ..... | ..... |
| Phypa_218828                                | ..... | ..... | ..... |
| Phypa1_1_127416_e_gw1.65.212.1              | ..... | ..... | ..... |
| Phypa1_1_50215_gw1.6.284.1                  | ..... | ..... | ..... |
| Phypa_167026                                | ..... | ..... | ..... |
| Phypa1_1_136986_e_gw1.133.91.1              | ..... | ..... | ..... |
| Phypa_188433                                | ..... | ..... | ..... |
| Phypa_165321                                | ..... | ..... | ..... |
| ARF8_AT5G37020                              | ..... | ..... | ..... |
| Pt198791_gw1.IV.3880.1                      | ..... | ..... | ..... |
| ARF6_AT1G30330                              | ..... | ..... | ..... |
| Pt205407_gw1.V.808.1                        | ..... | ..... | ..... |
| Selmo1_117217_e_gw1.55.235.1                | ..... | ..... | ..... |
| Selmo1_422125                               | ..... | ..... | ..... |
| Selmo1_424114_fgenes2_pg.C_scaffold_6500063 | ..... | ..... | ..... |
| Selmo1_446535                               | ..... | ..... | ..... |
| Selmo1_181406_estExt_Genewise1Plus.C_650169 | ..... | ..... | ..... |
| ARF19_AT1G19220                             | ..... | ..... | ..... |
| ARF7_AT5G20730                              | ..... | ..... | ..... |
| ZmGRMZM2G014864_P01                         | ..... | ..... | ..... |
| ARF5_AT1G19850                              | ..... | ..... | ..... |
| Selmo1_437944_estExt_fgenes2_pg.C_10526     | ..... | ..... | ..... |
| all_Phypa_77324                             | ..... | ..... | ..... |
| all_Phypa_159688                            | ..... | ..... | ..... |
| all_Phypa_225990                            | ..... | ..... | ..... |
| all_Phypa_171197                            | ..... | ..... | ..... |
| Pt179921_gw1.I.8521.1                       | ..... | ..... | ..... |
| Pt245007gw1.XIV.1750.1                      | ..... | ..... | ..... |
| ARF9_AT4G23980                              | ..... | ..... | ..... |
| ARF11_AT2G46530                             | ..... | ..... | ..... |
| ARF18_AT3G61830                             | ..... | ..... | ..... |
| ARF1_AT1G59750                              | ..... | ..... | ..... |
| ZmGRMZM2G017187_P02                         | ..... | ..... | ..... |
| ARF2_AT5G62000                              | ..... | ..... | ..... |
| ZmGRMZM2G006042_P01                         | ..... | ..... | ..... |
| Pt179307_gw1.I.7907.1                       | ..... | ..... | ..... |
| ARF21_AT1G34410                             | ..... | ..... | ..... |
| ARF20_AT1G35240                             | ..... | ..... | ..... |
| ARF22_AT1G34390                             | ..... | ..... | ..... |
| ARF12_AT1G34310                             | ..... | ..... | ..... |
| ARF15_AT1G35520                             | ..... | ..... | ..... |
| ARF14_AT1G35540                             | ..... | ..... | ..... |
| ARF13_AT1G34170                             | ..... | ..... | ..... |
| ARF4_AT5G60450                              | ..... | ..... | ..... |
| ARF3_AT2G33860                              | ..... | ..... | ..... |
| Pt243681_gw1.XIV.424.1                      | ..... | ..... | ..... |
| Selmo1_2_61688                              | ..... | ..... | ..... |
| Selmo1_2_51695                              | ..... | ..... | ..... |
| Phypa_108888                                | ..... | ..... | ..... |
| ARF10_AT2G28350                             | ..... | ..... | ..... |
| ARF16_AT4G30080                             | ..... | ..... | ..... |
| Phypa_61245                                 | ..... | ..... | ..... |
| ZmGRMZM2G005284_P01                         | ..... | ..... | ..... |
| ARF17_AT1G77850                             | ..... | ..... | ..... |
| Phypa_170581                                | ..... | ..... | ..... |
| all_Phypa_171888                            | ..... | ..... | ..... |
| Selmo1_2_405821                             | ..... | ..... | ..... |
| Selmo1_2_431298                             | ..... | ..... | ..... |
| Selmo1_2_431277                             | ..... | ..... | ..... |
| corb_UMD_Coleochaete_c9703_c_s_1            | ..... | ..... | ..... |
| spra_Contig219_1                            | ..... | ..... | ..... |
| IAA12_AT1G04550                             | ..... | ..... | ..... |
| Consensus                                   | ..... | ..... | ..... |
| Conservation                                | ..... | ..... | ..... |

|                                              | 1,600                                                                               | 1,620                                        |                                              |     |
|----------------------------------------------|-------------------------------------------------------------------------------------|----------------------------------------------|----------------------------------------------|-----|
| Phypa1_1_168019_estExt_fgenes1_pg.C_1630077  | .....                                                                               | .....                                        | 540                                          |     |
| Phypa_218828                                 | .....                                                                               | .....                                        | 375                                          |     |
| Phypa1_1_127416_e_gw1.65.212.1               | .....                                                                               | .....                                        | 448                                          |     |
| Phypa1_1_50215_gw1.6.284.1                   | .....                                                                               | .....                                        | 444                                          |     |
| Phypa_167026                                 | .....                                                                               | .....                                        | 643                                          |     |
| Phypa1_1_136986_e_gw1.133.91.1               | .....                                                                               | .....                                        | 366                                          |     |
| Phypa_188433                                 | .....                                                                               | .....                                        | 468                                          |     |
| Phypa_165321                                 | .....                                                                               | .....                                        | 458                                          |     |
| ARF8_AT5G37020                               | .....                                                                               | .....                                        | 472                                          |     |
| Pt198791_gw1.IV.3880.1                       | .....                                                                               | .....                                        | 452                                          |     |
| ARF6_AT1G30330                               | .....                                                                               | .....                                        | 484                                          |     |
| Pt205407_gw1.V.808.1                         | .....                                                                               | .....                                        | 368                                          |     |
| Selmo1_117217_e_gw1.55.235.1                 | .....                                                                               | .....                                        | 395                                          |     |
| Selmo1_422125                                | .....                                                                               | .....                                        | 478                                          |     |
| Selmo1_424114_fgenes2_pg.C_scaffold_65000063 | .....                                                                               | .....                                        | 432                                          |     |
| Selmo1_446535                                | .....                                                                               | .....                                        | 647                                          |     |
| Selmo1_181406_estExt_Genewise1Plus.C_650169  | .....                                                                               | .....                                        | 749                                          |     |
| ARF19_AT1G19220                              | .....                                                                               | .....                                        | 640                                          |     |
| ARF7_AT5G20730                               | <b>G</b> ..... <b>L</b> ..... <b>Q</b> .....                                        | <b>L</b> ..... <b>Q</b> ..... <b>A</b> ..... | <b>Q</b> ..... <b>L</b> ..... <b>L</b> ..... | 738 |
| ZmGRMZM2G014864_P01                          | .....                                                                               | .....                                        | 533                                          |     |
| ARF5_AT1G19850                               | <b>A</b> ..... <b>S</b> ..... <b>F</b> .....                                        | <b>R</b> ..... <b>Q</b> ..... <b>D</b> ..... | <b>T</b> ..... <b>G</b> ..... <b>T</b> ..... | 761 |
| Selmo1_437944_estExt_fgenes2_pg.C_10526      | <b>M</b> ..... <b>T</b> ..... <b>R</b> .....                                        | <b>S</b> ..... <b>A</b> ..... <b>G</b> ..... | <b>R</b> ..... <b>C</b> ..... <b>A</b> ..... | 660 |
| all_Phypa_77324                              | .....                                                                               | .....                                        | 940                                          |     |
| all_Phypa_159688                             | .....                                                                               | .....                                        | 826                                          |     |
| all_Phypa_225990                             | .....                                                                               | .....                                        | 527                                          |     |
| all_Phypa_171197                             | .....                                                                               | .....                                        | 1014                                         |     |
| Pt179921_gw1.I.8521.1                        | .....                                                                               | .....                                        | 358                                          |     |
| Pt245007gw1.XIV.1750.1                       | .....                                                                               | .....                                        | 363                                          |     |
| ARF9_AT4G23980                               | .....                                                                               | .....                                        | 368                                          |     |
| ARF11_AT2G46530                              | .....                                                                               | .....                                        | 375                                          |     |
| ARF18_AT3G61830                              | .....                                                                               | .....                                        | 380                                          |     |
| ARF1_AT1G59750                               | .....                                                                               | .....                                        | 384                                          |     |
| ZmGRMZM2G017187_P02                          | .....                                                                               | .....                                        | 391                                          |     |
| ARF2_AT5G62000                               | .....                                                                               | .....                                        | 449                                          |     |
| ZmGRMZM2G006042_P01                          | .....                                                                               | .....                                        | 430                                          |     |
| Pt179307_gw1.I.7907.1                        | .....                                                                               | .....                                        | 356                                          |     |
| ARF21_AT1G34410                              | <b>K</b> ..... <b>A</b> ..... <b>G</b> .....                                        | <b>T</b> ..... <b>L</b> ..... <b>D</b> ..... | <b>P</b> ..... <b>I</b> ..... <b>K</b> ..... | 476 |
| ARF20_AT1G35240                              | <b>K</b> ..... <b>A</b> ..... <b>T</b> .....                                        | <b>V</b> ..... <b>S</b> ..... <b>L</b> ..... | <b>D</b> ..... <b>P</b> ..... <b>I</b> ..... | 460 |
| ARF22_AT1G34390                              | <b>K</b> ..... <b>T</b> ..... <b>G</b> .....                                        | <b>V</b> ..... <b>S</b> ..... <b>L</b> ..... | <b>D</b> ..... <b>P</b> ..... <b>I</b> ..... | 474 |
| ARF12_AT1G34310                              | <b>K</b> ..... <b>T</b> ..... <b>G</b> .....                                        | <b>V</b> ..... <b>T</b> ..... <b>D</b> ..... | <b>D</b> ..... <b>P</b> ..... <b>I</b> ..... | 476 |
| ARF15_AT1G35520                              | <b>K</b> ..... <b>A</b> ..... <b>G</b> .....                                        | <b>V</b> ..... <b>S</b> ..... <b>L</b> ..... | <b>D</b> ..... <b>P</b> ..... <b>I</b> ..... | 480 |
| ARF14_AT1G35540                              | <b>N</b> ..... <b>A</b> ..... <b>V</b> .....                                        | <b>S</b> ..... <b>L</b> ..... <b>A</b> ..... | <b>D</b> ..... <b>P</b> ..... <b>V</b> ..... | 475 |
| ARF13_AT1G34170                              | .....                                                                               | .....                                        | <b>L</b> ..... <b>N</b> ..... <b>E</b> ..... | 377 |
| ARF4_AT5G60450                               | .....                                                                               | .....                                        | .....                                        | 419 |
| ARF3_AT2G33860                               | .....                                                                               | .....                                        | .....                                        | 403 |
| Pt243681_gw1.XIV.424.1                       | .....                                                                               | .....                                        | .....                                        | 288 |
| Selmo1_2_61688                               | .....                                                                               | .....                                        | .....                                        | 386 |
| Selmo1_2_51695                               | .....                                                                               | .....                                        | .....                                        | 408 |
| Phypa_108888                                 | .....                                                                               | .....                                        | .....                                        | 381 |
| ARF10_AT2G28350                              | .....                                                                               | .....                                        | .....                                        | 398 |
| ARF16_AT4G30080                              | .....                                                                               | .....                                        | .....                                        | 401 |
| Phypa_61245                                  | .....                                                                               | .....                                        | .....                                        | 228 |
| ZmGRMZM2G005284_P01                          | .....                                                                               | .....                                        | .....                                        | 403 |
| ARF17_AT1G77850                              | .....                                                                               | .....                                        | .....                                        | 393 |
| Phypa_170581                                 | .....                                                                               | .....                                        | .....                                        | 715 |
| all_Phypa_171888                             | .....                                                                               | .....                                        | .....                                        | 786 |
| Selmo1_2_405821                              | .....                                                                               | .....                                        | .....                                        | 146 |
| Selmo1_2_431298                              | .....                                                                               | .....                                        | .....                                        | 276 |
| Selmo1_2_431277                              | .....                                                                               | .....                                        | .....                                        | 17  |
| corb_UMD_Coleochaete_c9703_c_s_1             | .....                                                                               | .....                                        | .....                                        | 38  |
| spra_Contig219_1                             | .....                                                                               | .....                                        | .....                                        | 284 |
| IAA12_AT1G04550                              | .....                                                                               | .....                                        | .....                                        | 125 |
| Consensus                                    | .....                                                                               | .....                                        | .....                                        |     |
| Conservation                                 | 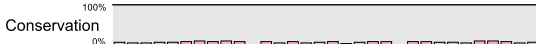 |                                              |                                              |     |

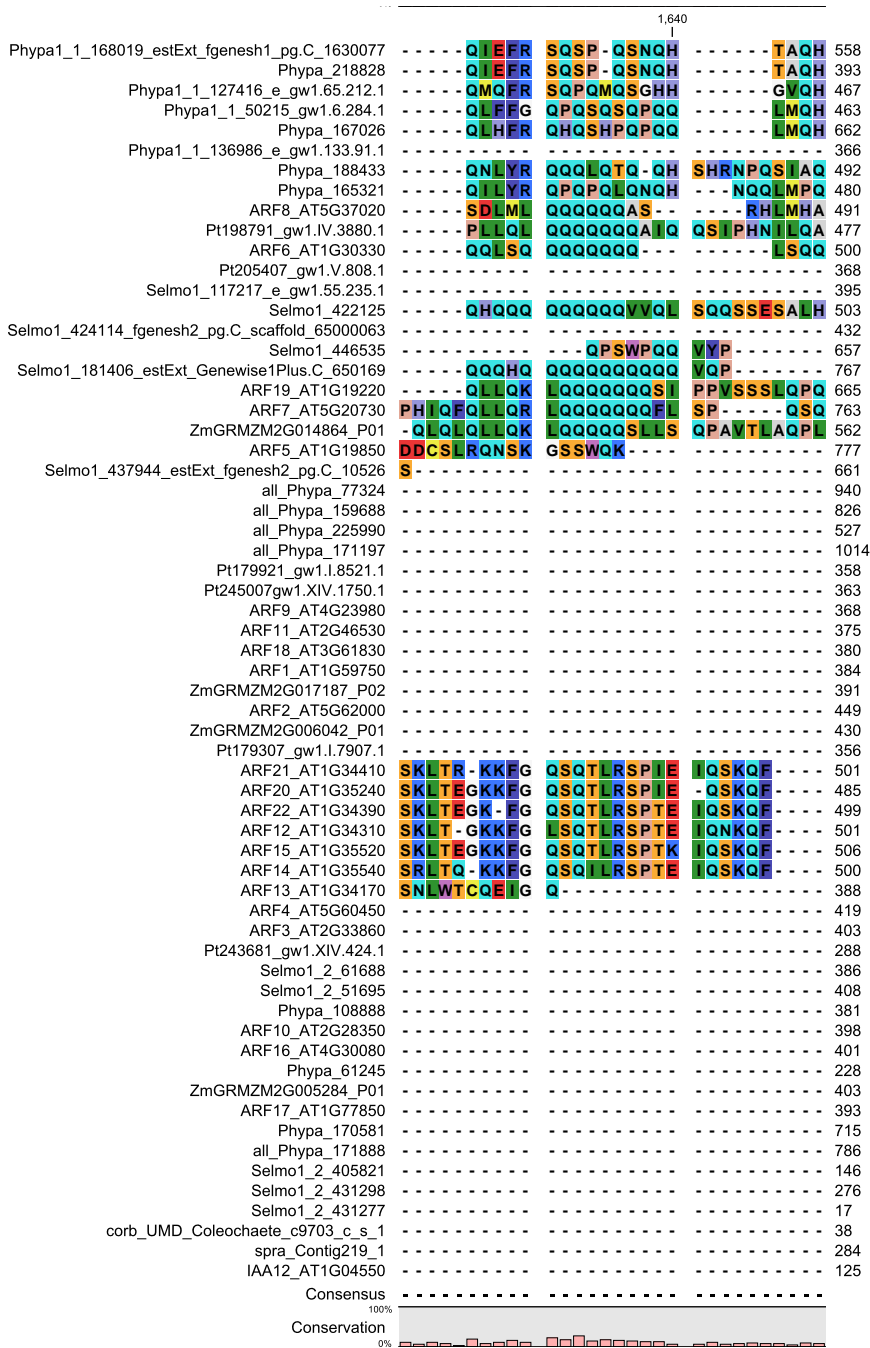

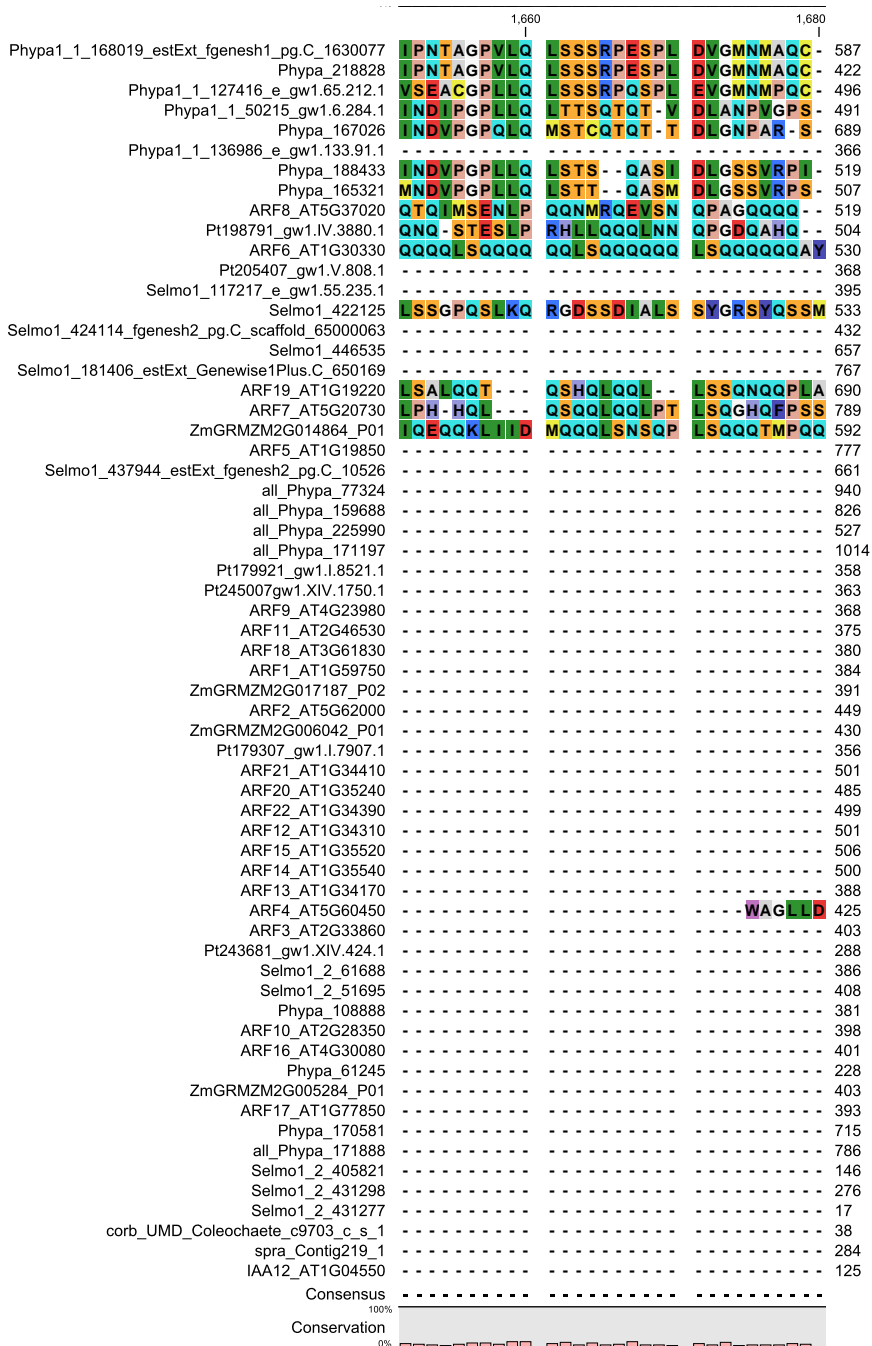

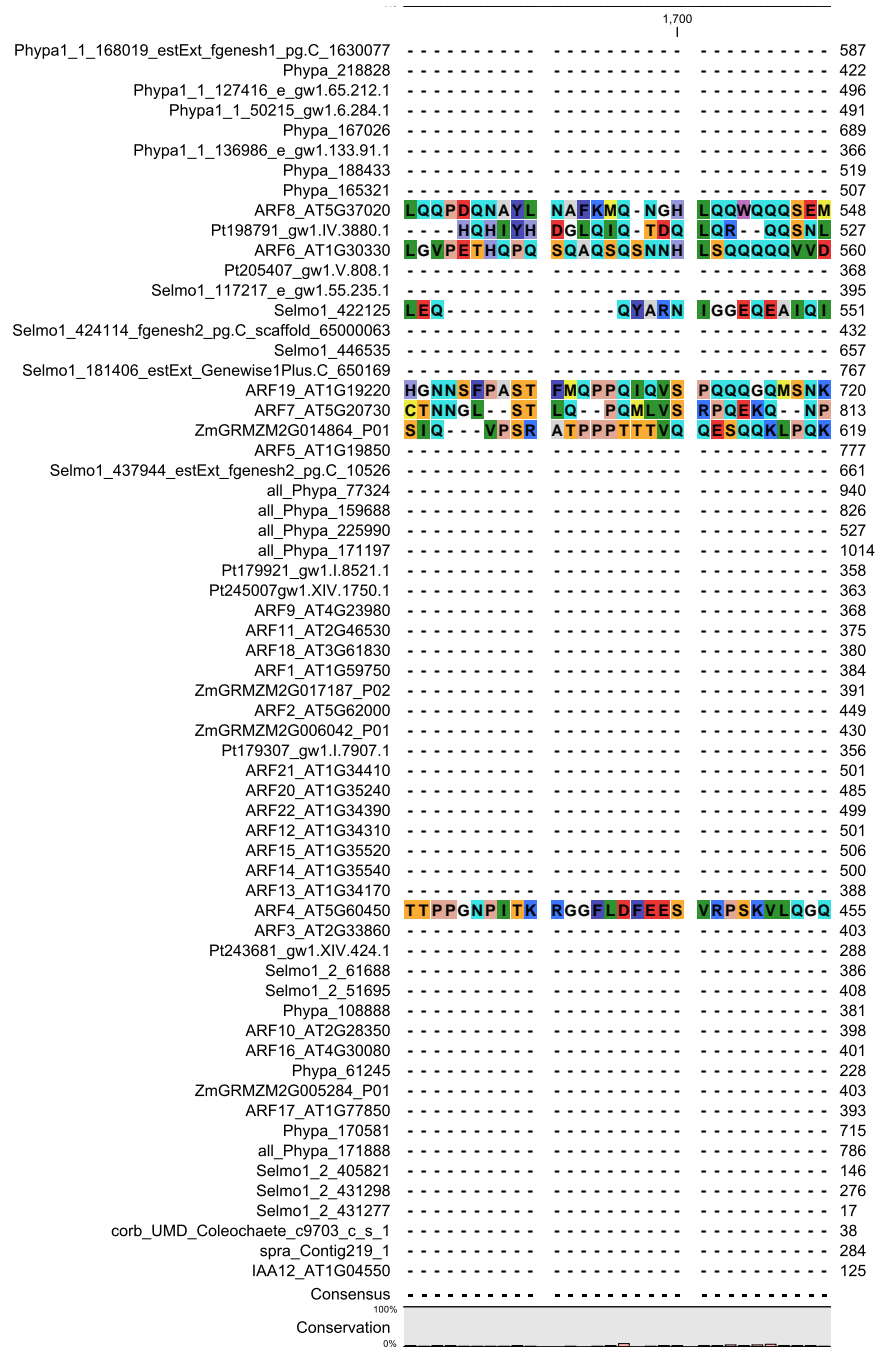

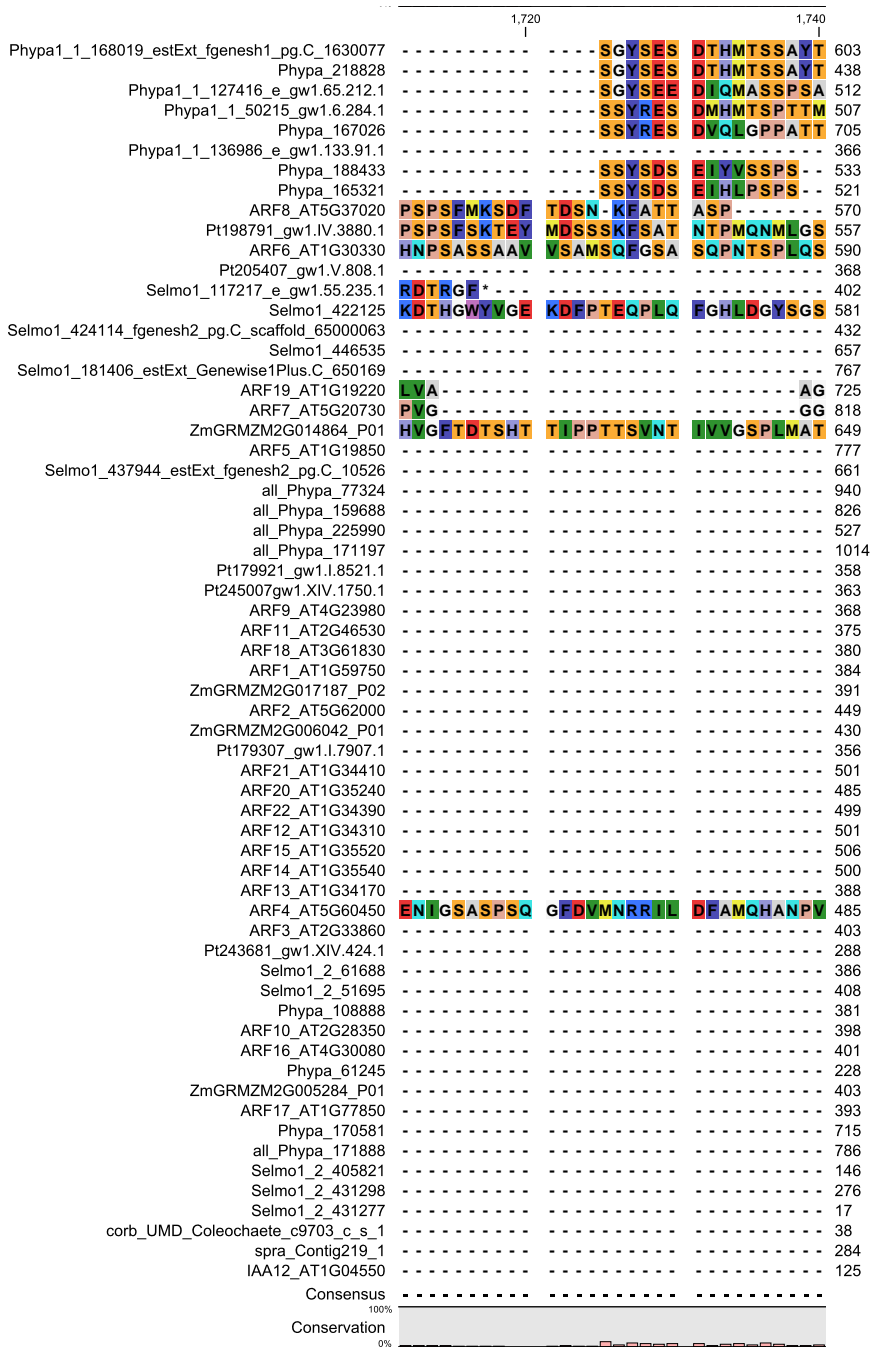

|                                              |                     | 1,760               |                     |
|----------------------------------------------|---------------------|---------------------|---------------------|
| Phypha1_1_168019_estExt_fgenes1_pg.C_1630077 | P G S Y P L H S M L | G R T H L G C       | --- - - E N G       |
| Phypha_218828                                | P G S Y P L H S M L | G R T H L G C       | --- - - E N G       |
| Phypha1_1_127416_e_gw1.65.212.1              | S G S Y P L H S M L | G R T H L G C       | --- - - E T G       |
| Phypha1_1_50215_gw1.6.284.1                  | S N S I A L Q G M M | R R A S T S A T L S | F S E G N           |
| Phypha_167026                                | S N S F S Y Q E M M | G R A P S S N P L T | S N G G H           |
| Phypha1_1_136986_e_gw1.133.91.1              | ---                 | ---                 | ---                 |
| Phypha_188433                                | P R P F S T Q A M M | S R I P G N V P Y S | S A D G N           |
| Phypha_165321                                | S R S F S I Q G M M | G R T L G N V P T N | S G D G N           |
| ARF8_AT5G37020                               | - A S               | ---                 | G D G N             |
| Pt198791_gw1.IV.3880.1                       | L C S               | ---                 | G S V N             |
| ARF6_AT1G30330                               | M T S L C H Q Q S F | S D T N G G N N P I | S P L H T           |
| Pt205407_gw1.V.808.1                         | ---                 | ---                 | ---                 |
| Selmo1_117217_e_gw1.55.235.1                 | ---                 | ---                 | ---                 |
| Selmo1_422125                                | G A V F S I N D I E | Q G V T A G L T F K | D A Q Q Q           |
| Selmo1_424114_fgenes2_pg.C_scaffold_6500063  | ---                 | ---                 | ---                 |
| Selmo1_446535                                | ---                 | ---                 | ---                 |
| Selmo1_181406_estExt_Genewise1Plus.C_650169  | ---                 | ---                 | ---                 |
| ARF19_AT1G19220                              | R S H S G H T D G   | E A P S C S T S P   | S A N N T G H D N V |
| ARF7_AT5G20730                               | V K A Y S G I T D G | G D A P S S S T S P | S T N N C - - Q I   |
| ZmGRMZM2G014864_P01                          | G A T H S V V T D   | E I P S C S T S P   | S T A N G N H I - V |
| ARF5_AT1G19850                               | ---                 | ---                 | ---                 |
| Selmo1_437944_estExt_fgenes2_pg.C_10526      | ---                 | ---                 | ---                 |
| all_Phypha_77324                             | ---                 | ---                 | ---                 |
| all_Phypha_159688                            | ---                 | ---                 | ---                 |
| all_Phypha_225990                            | ---                 | ---                 | ---                 |
| all_Phypha_171197                            | ---                 | ---                 | ---                 |
| Pt179921_gw1.I.8521.1                        | ---                 | ---                 | ---                 |
| Pt245007gw1.XIV.1750.1                       | ---                 | ---                 | ---                 |
| ARF9_AT4G23980                               | ---                 | ---                 | ---                 |
| ARF11_AT2G46530                              | ---                 | ---                 | ---                 |
| ARF18_AT3G61830                              | ---                 | ---                 | ---                 |
| ARF1_AT1G59750                               | ---                 | ---                 | ---                 |
| ZmGRMZM2G017187_P02                          | ---                 | ---                 | ---                 |
| ARF2_AT5G62000                               | ---                 | ---                 | ---                 |
| ZmGRMZM2G006042_P01                          | ---                 | ---                 | ---                 |
| Pt179307_gw1.I.7907.1                        | ---                 | ---                 | ---                 |
| ARF21_AT1G34410                              | ---                 | ---                 | ---                 |
| ARF20_AT1G35240                              | ---                 | ---                 | ---                 |
| ARF22_AT1G34390                              | ---                 | ---                 | ---                 |
| ARF12_AT1G34310                              | ---                 | ---                 | ---                 |
| ARF15_AT1G35520                              | ---                 | ---                 | ---                 |
| ARF14_AT1G35540                              | ---                 | ---                 | ---                 |
| ARF13_AT1G34170                              | ---                 | ---                 | ---                 |
| ARF4_AT5G60450                               | L V S S R V K D R F | G E F V D A T G V N | P A C S G V M D L D |
| ARF3_AT2G33860                               | ---                 | ---                 | ---                 |
| Pt243681_gw1.XIV.424.1                       | ---                 | ---                 | ---                 |
| Selmo1_2_61688                               | ---                 | ---                 | ---                 |
| Selmo1_2_51695                               | ---                 | ---                 | ---                 |
| Phypha_108888                                | ---                 | ---                 | ---                 |
| ARF10_AT2G28350                              | ---                 | ---                 | ---                 |
| ARF16_AT4G30080                              | ---                 | ---                 | ---                 |
| Phypha_61245                                 | ---                 | ---                 | ---                 |
| ZmGRMZM2G005284_P01                          | ---                 | ---                 | ---                 |
| ARF17_AT1G77850                              | ---                 | ---                 | ---                 |
| Phypha_170581                                | ---                 | ---                 | ---                 |
| all_Phypha_171888                            | ---                 | ---                 | ---                 |
| Selmo1_2_405821                              | ---                 | ---                 | ---                 |
| Selmo1_2_431298                              | ---                 | ---                 | ---                 |
| Selmo1_2_431277                              | ---                 | ---                 | ---                 |
| corb_UMD_Coleochaete_c9703_c_s_1             | ---                 | ---                 | ---                 |
| spra_Contig219_1                             | ---                 | ---                 | ---                 |
| IAA12_AT1G04550                              | ---                 | ---                 | ---                 |
| Consensus                                    | ---                 | ---                 | ---                 |
| Conservation                                 |                     |                     |                     |

|                                             | 1,780      | 1,800      |      |
|---------------------------------------------|------------|------------|------|
| Phypa1_1_168019_estExt_fgenes1_pg.C_1630077 | QMTYMMRPTQ | SAQQS      | 638  |
| Phypa_218828                                | QMTYMMRPTQ | SAQQS      | 473  |
| Phypa1_1_127416_e_gw1.65.212.1              | QVGLMMRPTQ | NAQQS      | 547  |
| Phypa1_1_50215_gw1.6.284.1                  | QITSLMRKSH | NGLPYGTVQ  | 552  |
| Phypa_167026                                | QLTSMRRTSQ | NGLPYGTVQ  | 760  |
| Phypa1_1_136986_e_gw1.133.91.1              | QFPLMRRTNQ | NGLPYGSVT  | 366  |
| Phypa_188433                                | QFPLMRRTNQ | NGLPYGSVT  | 583  |
| Phypa_165321                                | QFPLMRRTNQ | TGLSPCGLIA | 571  |
| ARF8_AT5G37020                              | LLNFSITGQ  | SVLPEQL    | 592  |
| Pt198791_gw1.IV.3880.1                      | LLDFSRAGQ  | STTEQL     | 580  |
| ARF6_AT1G30330                              | LLSNFSQDES | SQLLHLTRTN | 637  |
| Pt205407_gw1.V.808.1                        |            |            | 368  |
| Selmo1_117217_e_gw1.55.235.1                |            |            | 402  |
| Selmo1_422125                               | QEQDTLPLDS | RSHLLFG    | 623  |
| Selmo1_424114_fgenes2_pg.C_scaffold_6500063 |            |            | 432  |
| Selmo1_446535                               |            |            | 657  |
| Selmo1_181406_estExt_Genewise1Plus.C_650169 |            |            | 767  |
| ARF19_AT1G19220                             | SPTNFLSRNQ | QQGQAASVSA | 773  |
| ARF7_AT5G20730                              | SSSGFLNRSQ | S-GPAILIP  | 863  |
| ZmGRMZM2G014864_P01                         | QPW-LGRNQ  | LCSMINEKY  | 704  |
| ARF5_AT1G19850                              |            |            | 777  |
| Selmo1_437944_estExt_fgenes2_pg.C_10526     |            |            | 661  |
| all_Phypa_77324                             |            |            | 940  |
| all_Phypa_159688                            |            |            | 826  |
| all_Phypa_225990                            |            |            | 527  |
| all_Phypa_171197                            |            |            | 1014 |
| Pt179921_gw1.I.8521.1                       |            |            | 358  |
| Pt245007gw1.XIV.1750.1                      |            |            | 363  |
| ARF9_AT4G23980                              |            |            | 368  |
| ARF11_AT2G46530                             |            |            | 375  |
| ARF18_AT3G61830                             |            |            | 380  |
| ARF1_AT1G59750                              |            |            | 384  |
| ZmGRMZM2G017187_P02                         |            |            | 391  |
| ARF2_AT5G62000                              |            |            | 449  |
| ZmGRMZM2G006042_P01                         |            |            | 430  |
| Pt179307_gw1.I.7907.1                       |            |            | 356  |
| ARF21_AT1G34410                             |            |            | 501  |
| ARF20_AT1G35240                             |            |            | 485  |
| ARF22_AT1G34390                             |            |            | 499  |
| ARF12_AT1G34310                             |            |            | 501  |
| ARF15_AT1G35520                             |            |            | 506  |
| ARF14_AT1G35540                             |            |            | 500  |
| ARF13_AT1G34170                             |            |            | 388  |
| ARF4_AT5G60450                              | RFPRLQGQE  | LCSLKSFPQE | 545  |
| ARF3_AT2G33860                              |            | AGESPAAAPN | 403  |
| Pt243681_gw1.XIV.424.1                      |            |            | 288  |
| Selmo1_2_61688                              |            |            | 386  |
| Selmo1_2_51695                              |            |            | 408  |
| Phypa_108888                                |            |            | 381  |
| ARF10_AT2G28350                             |            |            | 398  |
| ARF16_AT4G30080                             |            |            | 401  |
| Phypa_61245                                 |            |            | 228  |
| ZmGRMZM2G005284_P01                         |            |            | 403  |
| ARF17_AT1G77850                             |            |            | 393  |
| Phypa_170581                                |            |            | 715  |
| all_Phypa_171888                            |            |            | 786  |
| Selmo1_2_405821                             |            |            | 146  |
| Selmo1_2_431298                             |            |            | 276  |
| Selmo1_2_431277                             |            |            | 17   |
| corb_UMD_Coleochaete_c9703_c_s_1            |            |            | 38   |
| spra_Contig219_1                            |            |            | 284  |
| IAA12_AT1G04550                             |            |            | 125  |
| Consensus                                   |            |            |      |
| Conservation                                |            |            |      |



|                                              |                                      |      |
|----------------------------------------------|--------------------------------------|------|
| Phyph1_1_168019_estExt_fgenes1_pg.C_1630077  | -- QPESI I HG GSVREPQF --            | 654  |
| Phyph1_1_168019_estExt_fgenes1_pg.C_218828   | -- QPESI I HG GSVREPQF --            | 489  |
| Phyph1_1_127416_e_gw1.65.212.1               | -- QSGPI I HG GKT-SPYFFF RTIPI SLRIN | 574  |
| Phyph1_1_50215_gw1.6.284.1                   | -----                                | 552  |
| Phyph1_167026                                | VVHAE LVRGF SVTMI LLSHV FLFLWKYSAE   | 790  |
| Phyph1_1_136986_e_gw1.133.91.1               | -----                                | 366  |
| Phyph1_188433                                | -----                                | 583  |
| Phyph1_165321                                | -----                                | 571  |
| ARF8_AT5G37020                               | -----                                | 592  |
| Pt198791_gw1.IV.3880.1                       | -----                                | 580  |
| ARF6_AT1G30330                               | -----                                | 637  |
| Pt205407_gw1.V.808.1                         | -----                                | 368  |
| Selmo1_117217_e_gw1.55.235.1                 | -----                                | 402  |
| Selmo1_422125                                | ----- VS                             | 625  |
| Selmo1_424114_fgenes2_pg.C_scaffold_65000063 | -----                                | 432  |
| Selmo1_446535                                | -----                                | 657  |
| Selmo1_181406_estExt_Genewise1Plus.C_650169  | -----                                | 767  |
| ARF19_AT1G19220                              | SDSVFERASN PVQELYTKTE SRISQGM        | 800  |
| ARF7_AT5G20730                               | -DAALDMSGN LVQDLYSK-D MRLKQEL        | 888  |
| ZmGRMZM2G014864_P01                          | SLEAVTATPR SIKEI - PLN SNVKQSVMAS    | 732  |
| ARF5_AT1G19850                               | -----                                | 777  |
| Selmo1_437944_estExt_fgenes2_pg.C_10526      | -----                                | 661  |
| all_Phyph1_77324                             | -----                                | 940  |
| all_Phyph1_159688                            | -----                                | 826  |
| all_Phyph1_225990                            | -----                                | 527  |
| all_Phyph1_171197                            | -----                                | 1014 |
| Pt179921_gw1.I.8521.1                        | -----                                | 358  |
| Pt245007gw1.XIV.1750.1                       | -----                                | 363  |
| ARF9_AT4G23980                               | -----                                | 368  |
| ARF11_AT2G46530                              | -----                                | 375  |
| ARF18_AT3G61830                              | -----                                | 380  |
| ARF1_AT1G59750                               | -----                                | 384  |
| ZmGRMZM2G017187_P02                          | -----                                | 391  |
| ARF2_AT5G62000                               | -----                                | 449  |
| ZmGRMZM2G006042_P01                          | -----                                | 430  |
| Pt179307_gw1.I.7907.1                        | -----                                | 356  |
| ARF21_AT1G34410                              | -----                                | 501  |
| ARF20_AT1G35240                              | -----                                | 485  |
| ARF22_AT1G34390                              | -----                                | 499  |
| ARF12_AT1G34310                              | -----                                | 501  |
| ARF15_AT1G35520                              | -----                                | 506  |
| ARF14_AT1G35540                              | -----                                | 500  |
| ARF13_AT1G34170                              | -----                                | 388  |
| ARF4_AT5G60450                               | PFAYQANKSS YYPEAHGIRS THVPYQNPYN     | 575  |
| ARF3_AT2G33860                               | -----                                | 403  |
| Pt243681_gw1.XIV.424.1                       | -----                                | 288  |
| Selmo1_2_61688                               | -----                                | 386  |
| Selmo1_2_51695                               | -----                                | 408  |
| Phyph1_108888                                | -----                                | 381  |
| ARF10_AT2G28350                              | -----                                | 398  |
| ARF16_AT4G30080                              | -----                                | 401  |
| Phyph1_61245                                 | -----                                | 228  |
| ZmGRMZM2G005284_P01                          | -----                                | 403  |
| ARF17_AT1G77850                              | -----                                | 393  |
| Phyph1_170581                                | -----                                | 715  |
| all_Phyph1_171888                            | -----                                | 786  |
| Selmo1_2_405821                              | -----                                | 146  |
| Selmo1_2_431298                              | -----                                | 276  |
| Selmo1_2_431277                              | -----                                | 17   |
| corb_UMD_Coleochaete_c9703_c_s_1             | -----                                | 38   |
| spra_Contig219_1                             | -----                                | 284  |
| IAA12_AT1G04550                              | -----                                | 125  |
| Consensus                                    | -----                                |      |
| Conservation                                 | -----                                |      |

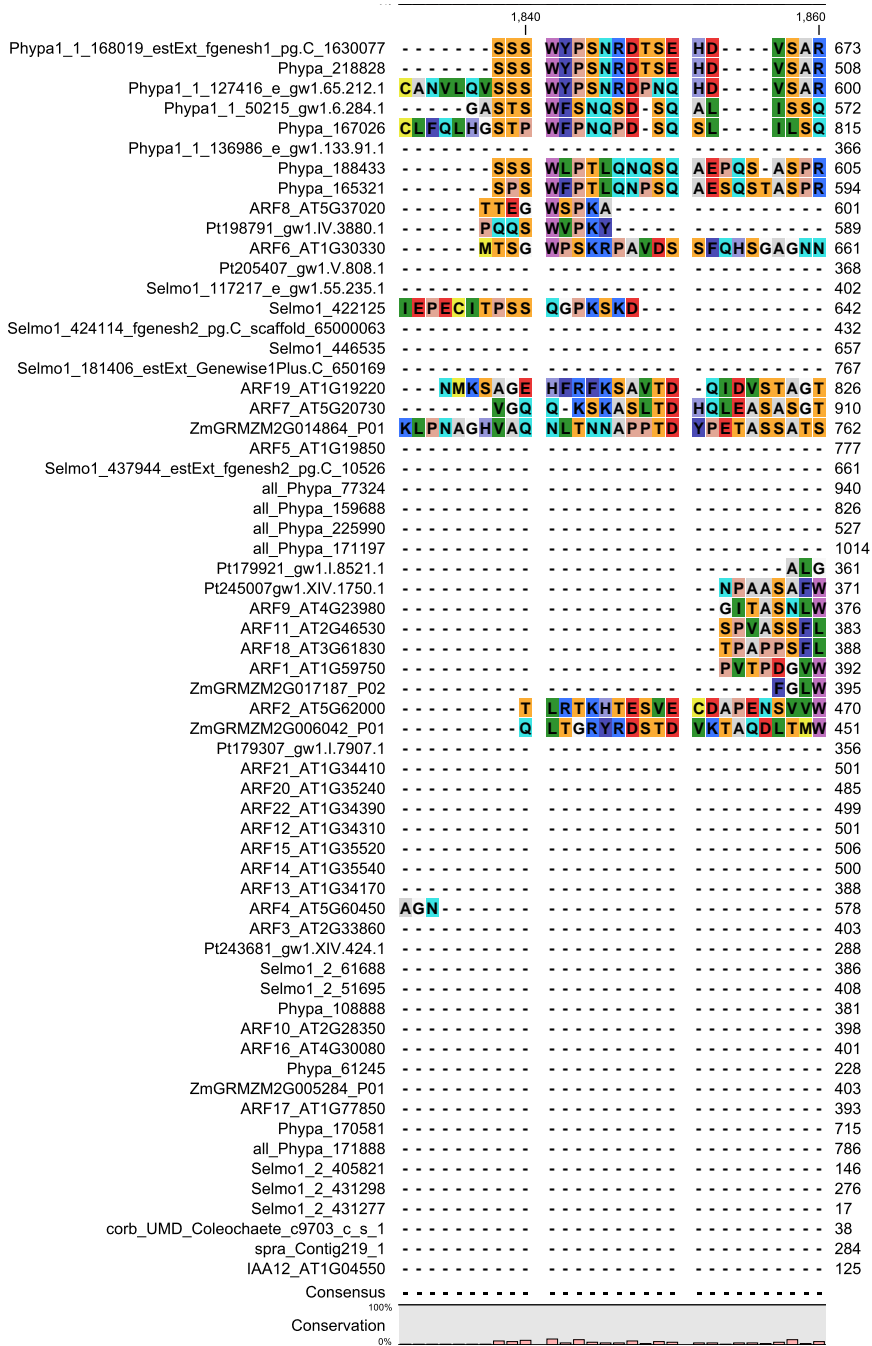

|                                              |            |            |            |            |            |      |     |
|----------------------------------------------|------------|------------|------------|------------|------------|------|-----|
| Phypa1_1_168019_estExt_fgenes1_pg.C_1630077  | MNQL       | -----      | -----      | -----      | -----      | 677  |     |
| Phypa_218828                                 | MNQL       | -----      | -----      | -----      | -----      | 512  |     |
| Phypa1_1_127416_e_gw1.65.212.1               | MNQL       | -----      | -----      | -----      | -----      | 604  |     |
| Phypa1_1_50215_gw1.6.284.1                   | QSRV       | -----      | -----      | -----      | -----      | 576  |     |
| Phypa_167026                                 | HTRV       | -----      | -----      | -----      | -----      | 819  |     |
| Phypa1_1_136986_e_gw1.133.91.1               | -----      | -----      | -----      | -----      | -----      | 366  |     |
| Phypa_188433                                 | FHRA       | -----      | -----      | -----      | -----      | 609  |     |
| Phypa_165321                                 | LHRV       | -----      | -----      | -----      | -----      | 598  |     |
| ARF8_AT5G37020                               | -----      | -----      | S-----     | NTFSE      | PLSLPQAYPG | 617  |     |
| Pt198791_gw1.IV.3880.1                       | -----      | -----      | AHQEVNAFAN | SISLPRTYPE | -----      | 609  |     |
| ARF6_AT1G30330                               | NTQSVLEQLG | QSHTSNVPPN | AVSLPPFPGG | -----      | -----      | 691  |     |
| Pt205407_gw1.V.808.1                         | -----      | -----      | -----      | -----      | -----      | 368  |     |
| Selmo1_117217_e_gw1.55.235.1                 | -----      | -----      | -----      | -----      | -----      | 402  |     |
| Selmo1_422125                                | -----      | -----      | -----      | -----      | -----      | 642  |     |
| Selmo1_424114_fgenes2_pg.C_scaffold_65000063 | -----      | -----      | -----      | -----      | -----      | 432  |     |
| Selmo1_446535                                | -----      | -----      | -----      | -----      | -----      | 657  |     |
| Selmo1_181406_estExt_Genewise1Plus.C_650169  | -----      | -----      | -----      | -----      | -----      | 767  |     |
| ARF19_AT1G19220                              | TYCPDVVGP  | -----      | -----      | V          | QQQQT      | PL   | 844 |
| ARF7_AT5G20730                               | SYGLDG-GE  | -----      | -----      | N          | NRQQNE     | LA   | 927 |
| ZmGRMZM2G014864_P01                          | VWLSQADGL  | HHSFPMSNFN | QQQMFKAAA  | -----      | -----      | 792  |     |
| ARF5_AT1G19850                               | -----      | -----      | -----      | -----      | -----      | 777  |     |
| Selmo1_437944_estExt_fgenes2_pg.C_10526      | -----      | -----      | -----      | -----      | -----      | 661  |     |
| all_Phypa_77324                              | -----      | -----      | -----      | -----      | -----      | 940  |     |
| all_Phypa_159688                             | -----      | -----      | -----      | -----      | -----      | 826  |     |
| all_Phypa_225990                             | -----      | -----      | -----      | -----      | -----      | 527  |     |
| all_Phypa_171197                             | -----      | -----      | -----      | -----      | -----      | 1014 |     |
| Pt179921_gw1.I.8521.1                        | YSTPLSSKS  | -K         | -----      | -----      | -----      | 371  |     |
| Pt245007gw1.XIV.1750.1                       | YHGPTQSR   | VQ         | -----      | -----      | -----      | 383  |     |
| ARF9_AT4G23980                               | SSVLTQPHEF | AQS        | -----      | -----      | -----      | 389  |     |
| ARF11_AT2G46530                              | SSFSQSHESN | -----      | -----      | -----      | -----      | 393  |     |
| ARF18_AT3G61830                              | YSLPQSQDSI | -----      | -----      | -----      | -----      | 398  |     |
| ARF1_AT1G59750                               | KSPADTPSVP | LFS        | -----      | -----      | PP         | 407  |     |
| ZmGRMZM2G017187_P02                          | KSPTECTLS  | -FS        | -----      | -----      | EP         | 409  |     |
| ARF2_AT5G62000                               | QSSADDDKVD | VSGSRRYGE  | NWMSRARHEP | -----      | -----      | 500  |     |
| ZmGRMZM2G006042_P01                          | SSGTEQQRNN | IAAQTKRCE  | GWTQS      | -RTP       | -----      | 479  |     |
| Pt179307_gw1.I.7907.1                        | -----      | -----      | -----      | -----      | -----      | 356  |     |
| ARF21_AT1G34410                              | -----      | -----      | -----      | -----      | -----      | 501  |     |
| ARF20_AT1G35240                              | -----      | -----      | -----      | -----      | -----      | 485  |     |
| ARF22_AT1G34390                              | -----      | -----      | -----      | -----      | -----      | 499  |     |
| ARF12_AT1G34310                              | -----      | -----      | -----      | -----      | -----      | 501  |     |
| ARF15_AT1G35520                              | -----      | -----      | -----      | -----      | -----      | 506  |     |
| ARF14_AT1G35540                              | -----      | -----      | -----      | -----      | -----      | 500  |     |
| ARF13_AT1G34170                              | -----      | -----      | -----      | -----      | -----      | 388  |     |
| ARF4_AT5G60450                               | -----      | -----      | -----      | -----      | -----      | 578  |     |
| ARF3_AT2G33860                               | -----      | -----      | -----      | -----      | -----      | 403  |     |
| Pt243681_gw1.XIV.424.1                       | -----      | -----      | -----      | -----      | -----      | 288  |     |
| Selmo1_2_61688                               | -----      | -----      | -----      | -----      | LDL        | 389  |     |
| Selmo1_2_51695                               | -----      | -----      | -----      | -----      | TPA        | 411  |     |
| Phypa_108888                                 | -----      | -----      | -----      | -----      | VQP        | 384  |     |
| ARF10_AT2G28350                              | -----      | -----      | -----      | -----      | PQP        | 401  |     |
| ARF16_AT4G30080                              | -----      | -----      | -----      | -----      | QHP        | 404  |     |
| Phypa_61245                                  | -----      | -----      | -----      | -----      | ---        | 228  |     |
| ZmGRMZM2G005284_P01                          | -----      | -----      | -----      | -----      | TYK        | 406  |     |
| ARF17_AT1G77850                              | -----      | -----      | -----      | -----      | PQP        | 396  |     |
| Phypa_170581                                 | -----      | -----      | -----      | -----      | -----      | 715  |     |
| all_Phypa_171888                             | -----      | -----      | -----      | -----      | -----      | 786  |     |
| Selmo1_2_405821                              | -----      | -----      | -----      | -----      | -----      | 146  |     |
| Selmo1_2_431298                              | -----      | -----      | -----      | -----      | -----      | 276  |     |
| Selmo1_2_431277                              | -----      | -----      | -----      | -----      | -----      | 17   |     |
| corb_UMD_Coleochaete_c9703_c_s_1             | -----      | -----      | -----      | -----      | -----      | 38   |     |
| spra_Contig219_1                             | -----      | -----      | -----      | -----      | -----      | 284  |     |
| IAA12_AT1G04550                              | -----      | -----      | -----      | -----      | -----      | 125  |     |

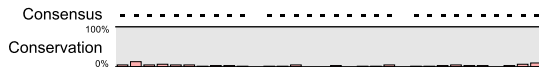

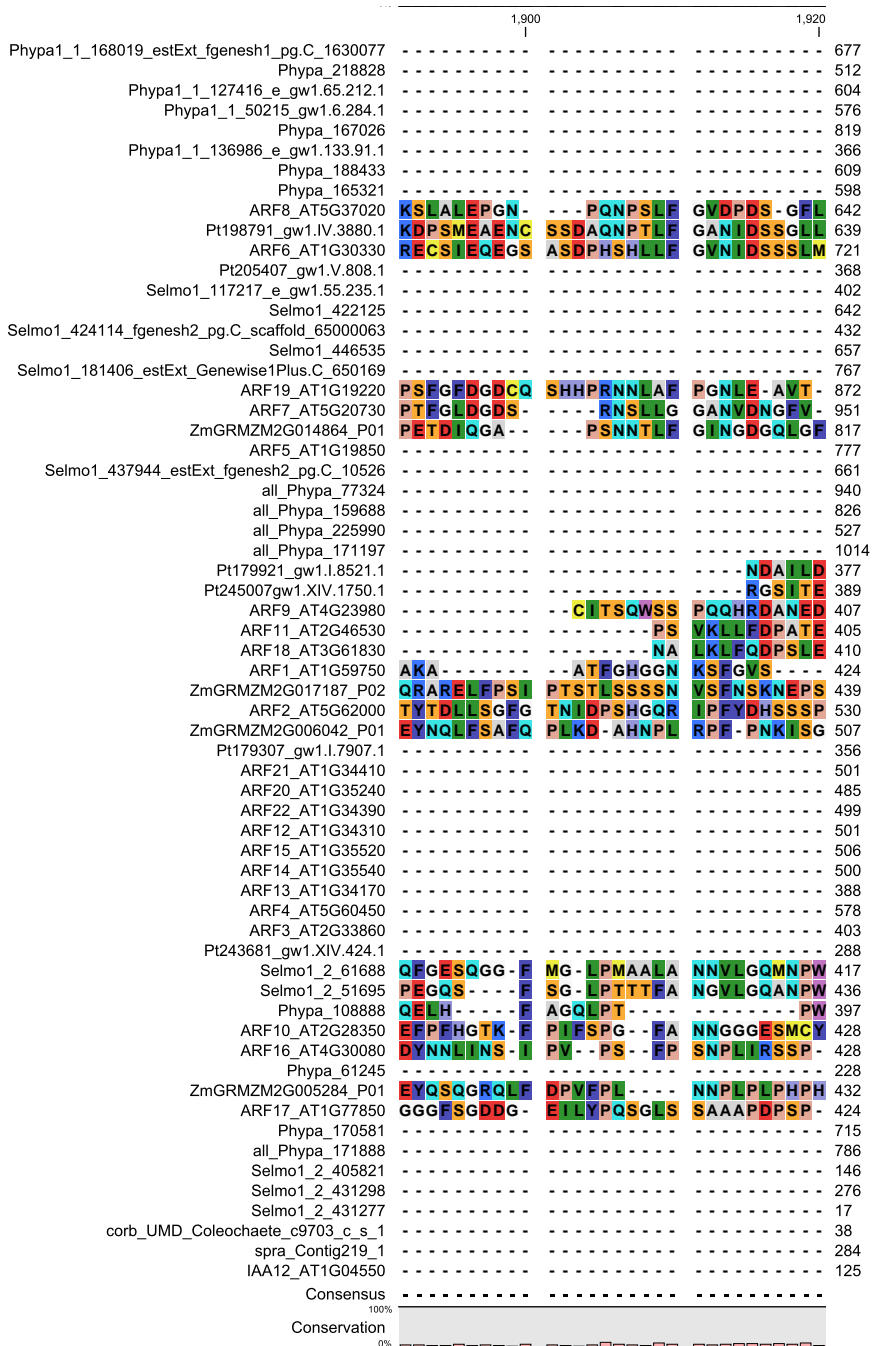

|                                              |              |            |             |      |
|----------------------------------------------|--------------|------------|-------------|------|
| Phypha1_1_168019_estExt_fgenes1_pg.C_1630077 | -----DT      | SPTSRVSSCF | PFPPQESQVNG | 699  |
| Phypha_218828                                | -----DT      | SPTSRVSSCF | PFPPQESQVNG | 534  |
| Phypha1_1_127416_e_gw1.65.212.1              | -----DT      | SPTSRVSGSF | SLSQQSENGG  | 626  |
| Phypha1_1_50215_gw1.6.284.1                  | -----E       | ASSGGVPESY | ALPQNNESL   | 597  |
| Phypha_167026                                | -----E       | APSGGVPGS  | ALPQNNESAL  | 840  |
| Phypha1_1_136986_e_gw1.133.91.1              | -----        |            |             | 366  |
| Phypha_188433                                | -----EA      | SIGGGVPGLY | GPIQHGE     | 628  |
| Phypha_165321                                | -----EV      | PNGGGVPGSY | GFTQHGEFDV  | 620  |
| ARF8_AT5G37020                               | PSTVPRFASS   | SGDA-EASPM | SLTDSGFQNS  | 671  |
| Pt198791_gw1.IV.3880.1                       | LTIVPRYSTS   | SIDA-DVSSM | PLGDSGFQNS  | 668  |
| ARF6_AT1G30330                               | PNGMSNLRSL   | GIEGGDSTTL | PFTSSNFNND  | 751  |
| Pt205407_gw1.V.808.1                         | -----        |            |             | 368  |
| Selmo1_117217_e_gw1.55.235.1                 | -----        |            |             | 402  |
| Selmo1_422125                                | -----GQQ     | RVLSSSTASD | HLSSDNGT    | 663  |
| Selmo1_424114_fgenes2_pg.C_scaffold_65000063 | -----        |            |             | 432  |
| Selmo1_446535                                | -----        |            |             | 657  |
| Selmo1_181406_estExt_Genewise1Plus.C_650169  | -----        |            |             | 767  |
| ARF19_AT1G19220                              | -----SDPL    |            |             | 876  |
| ARF7_AT5G20730                               | -----PDTLLSR | G          |             | 959  |
| ZmGRMZM2G014864_P01                          | PMGADDFLSN   | G          |             | 828  |
| ARF5_AT1G19850                               | -----        |            |             | 777  |
| Selmo1_437944_estExt_fgenes2_pg.C_10526      | -----        |            |             | 661  |
| all_Phypha_77324                             | -----        |            |             | 940  |
| all_Phypha_159688                            | -----        |            |             | 826  |
| all_Phypha_225990                            | -----        |            |             | 527  |
| all_Phypha_171197                            | -----        |            |             | 1014 |
| Pt179921_gw1.I.8521.1                        | PSDK         |            |             | 381  |
| Pt245007gw1.XIV.1750.1                       | VQSSE        |            |             | 394  |
| ARF9_AT4G23980                               | AKKSDWLNNS   | YSVSNV     |             | 423  |
| ARF11_AT2G46530                              | RNSNKSVFSS   |            |             | 415  |
| ARF18_AT3G61830                              | RISGGYSSNN   |            |             | 420  |
| ARF1_AT1G59750                               | LIGSAFWPTN   | A          |             | 434  |
| ZmGRMZM2G017187_P02                          | MITSQFYWSA   | R          |             | 450  |
| ARF2_AT5G62000                               | SMPAKRILSD   | SEKFDYLAN  | Q-WQMTHSG   | 558  |
| ZmGRMZM2G006042_P01                          | TRSSTWVTD    | AR         | YPAQ        | 533  |
| Pt179307_gw1.I.7907.1                        | -----        |            |             | 356  |
| ARF21_AT1G34410                              | -----        |            |             | 501  |
| ARF20_AT1G35240                              | -----        |            |             | 485  |
| ARF22_AT1G34390                              | -----        |            |             | 499  |
| ARF12_AT1G34310                              | -----        |            |             | 501  |
| ARF15_AT1G35520                              | -----        |            |             | 506  |
| ARF14_AT1G35540                              | -----        |            |             | 500  |
| ARF13_AT1G34170                              | -----        |            |             | 388  |
| ARF4_AT5G60450                               | -----        |            |             | 578  |
| ARF3_AT2G33860                               | -----        |            |             | 403  |
| Pt243681_gw1.XIV.424.1                       | -----        |            |             | 288  |
| Selmo1_2_61688                               | QS-LSEE      |            | V           | 424  |
| Selmo1_2_51695                               | HG-LSDD      |            | V           | 443  |
| Phypha_108888                                | GGPALLEN     |            | A           | 406  |
| ARF10_AT2G28350                              | LSNDN-NN     |            | A           | 436  |
| ARF16_AT4G30080                              | LSVLDN       |            | V           | 436  |
| Phypha_61245                                 | -----        |            |             | 228  |
| ZmGRMZM2G005284_P01                          | HHPAPTHDWN   | CHGFVHCSSF | PFPPDSAPAA  | 462  |
| ARF17_AT1G77850                              | -----        |            | SMEFSYSTF   | 432  |
| Phypha_170581                                | -----        |            |             | 715  |
| all_Phypha_171888                            | -----        |            |             | 786  |
| Selmo1_2_405821                              | -----        |            |             | 146  |
| Selmo1_2_431298                              | -----        |            |             | 276  |
| Selmo1_2_431277                              | -----        |            |             | 17   |
| corb_UMD_Coleochaete_c9703_c_s_1             | -----        |            |             | 38   |
| spra_Contig219_1                             | -----        |            |             | 284  |
| IAA12_AT1G04550                              | -----        |            |             | 125  |
| Consensus                                    | -----        |            |             |      |
| Conservation                                 | -----        |            |             |      |

|                                             | 1,960      | 1          | 1,980       |      |
|---------------------------------------------|------------|------------|-------------|------|
| Phypa1_1_168019_estExt_fgenes1_pg.C_1630077 | QSGLTGLPVP | TSSFVYRENG | QEQDSVQSDR  | 729  |
| Phypa_218828                                | QSGLTGLPVP | TSSFVYRENG | QEQDSVQSDR  | 564  |
| Phypa1_1_127416_e_gw1.65.212.1              | QSGLTGMPVP | ASSFMFRESG | QEQDSVQSDR  | 656  |
| Phypa1_1_50215_gw1.6.284.1                  | HQGL-GHQLP | -GFRSND    | QDSDQLQADR  | 623  |
| Phypa_167026                                | -QGK-NVLLS | -          | -           | 848  |
| Phypa1_1_136986_e_gw1.133.91.1              | --GK-GVQL* | -          | -           | 373  |
| Phypa_188433                                | -          | -          | -           | 628  |
| Phypa_165321                                | QPSLEHLPT- | -GFRSNG    | AESDQLQTR   | 646  |
| ARF8_AT5G37020                              | LYS-       | -C         | -           | 675  |
| Pt198791_gw1.IV.3880.1                      | LYG-       | -C         | -           | 672  |
| ARF6_AT1G30330                              | ESGNLAMITP | SSC-       | -           | 764  |
| Pt205407_gw1.V.808.1                        | -          | -          | -           | 368  |
| Selmo1_117217_e_gw1.55.235.1                | -          | -          | -           | 402  |
| Selmo1_422125                               | -          | -          | -           | 663  |
| Selmo1_424114_fgenes2_pg.C_scaffold_6500063 | -          | -          | -           | 432  |
| Selmo1_446535                               | -          | -          | -           | 657  |
| Selmo1_181406_estExt_Genewise1Plus.C_650169 | -          | -          | -           | 767  |
| ARF19_AT1G19220                             | -          | -          | YSQ         | 879  |
| ARF7_AT5G20730                              | -          | -          | YSQ         | 962  |
| ZmGRMZM2G014864_P01                         | -          | -          | IDA         | 831  |
| ARF5_AT1G19850                              | -          | -          | -           | 777  |
| Selmo1_437944_estExt_fgenes2_pg.C_10526     | -          | -          | -           | 661  |
| all_Phypa_77324                             | -          | -          | -           | 940  |
| all_Phypa_159688                            | -          | -          | -           | 826  |
| all_Phypa_225990                            | -          | -          | -           | 527  |
| all_Phypa_171197                            | -          | -          | -           | 1014 |
| Pt179921_gw1.I.8521.1                       | -          | -GRK       | SEVPTS      | 391  |
| Pt245007gw1.XIV.1750.1                      | -          | -SHVWSMQ   | KEIDSNLNNN  | 411  |
| ARF9_AT4G23980                              | -AKDSTLND  | QMVSPVEQKK | PETTANY     | 448  |
| ARF11_AT2G46530                             | -          | -GLQ       | CKITEAPVTS  | 428  |
| ARF18_AT3G61830                             | -          | -SFK       | PETPPPTTNC  | 433  |
| ARF1_AT1G59750                              | -DSAAE     | SEASAFNNE  | TEKKQT-NGN  | 458  |
| ZmGRMZM2G017187_P02                         | -HTRAD     | SCAASTNTV  | TEKKQEPSSG  | 475  |
| ARF2_AT5G62000                              | LSKLEHESP  | KVPAATDAS  | QGRCNVKEYSE | 586  |
| ZmGRMZM2G006042_P01                         | LSFMPHSSGF | RMQQNNLVT  | PEAANFTKSA  | 563  |
| Pt179307_gw1.I.7907.1                       | -          | -          | -           | 356  |
| ARF21_AT1G34410                             | -          | -          | -           | 501  |
| ARF20_AT1G35240                             | -          | -          | -           | 485  |
| ARF22_AT1G34390                             | -          | -          | -           | 499  |
| ARF12_AT1G34310                             | -          | -          | -           | 501  |
| ARF15_AT1G35520                             | -          | -          | -           | 506  |
| ARF14_AT1G35540                             | -          | -          | -           | 500  |
| ARF13_AT1G34170                             | -          | -          | -           | 388  |
| ARF4_AT5G60450                              | -          | -          | -           | 578  |
| ARF3_AT2G33860                              | -          | -          | -           | 403  |
| Pt243681_gw1.XIV.424.1                      | -          | -          | -           | 288  |
| Selmo1_2_61688                              | PAGMQGARQ- | ERFYGLTIS  | DPPHHLRLHR  | 452  |
| Selmo1_2_51695                              | PAGMQGARH- | ERLYGLTIS  | EC-QPTRLHS  | 470  |
| Phypa_108888                                | SAGMQGARH- | DRFNGPPSM  | D-          | 425  |
| ARF10_AT2G28350                             | PAGTQGARQ- | AQQLFGSPSP | SLLSDNLNLS  | 465  |
| ARF16_AT4G30080                             | PVGLQGARHN | AHQYGLSS-  | SDLH-HY     | 461  |
| Phypa_61245                                 | -          | -          | -           | 228  |
| ZmGRMZM2G005284_P01                         | AAGTQGARH- | ANFAQFLFS  | HLLSNLRRSL  | 490  |
| ARF17_AT1G77850                             | PAGMQGARQY | DFGSFNPT   | -           | 450  |
| Phypa_170581                                | -          | -          | -           | 715  |
| all_Phypa_171888                            | -          | -          | -           | 786  |
| Selmo1_2_405821                             | -          | -          | -           | 146  |
| Selmo1_2_431298                             | -          | -          | -           | 276  |
| Selmo1_2_431277                             | -          | -          | -           | 17   |
| corb_UMD_Coleochaete_c9703_c_s_1            | -          | -          | -           | 38   |
| spra_Contig219_1                            | -          | -          | -           | 284  |
| IAA12_AT1G04550                             | -          | -          | -           | 125  |
| Consensus                                   | -          | -          | -           |      |
| Conservation                                |            |            |             |      |

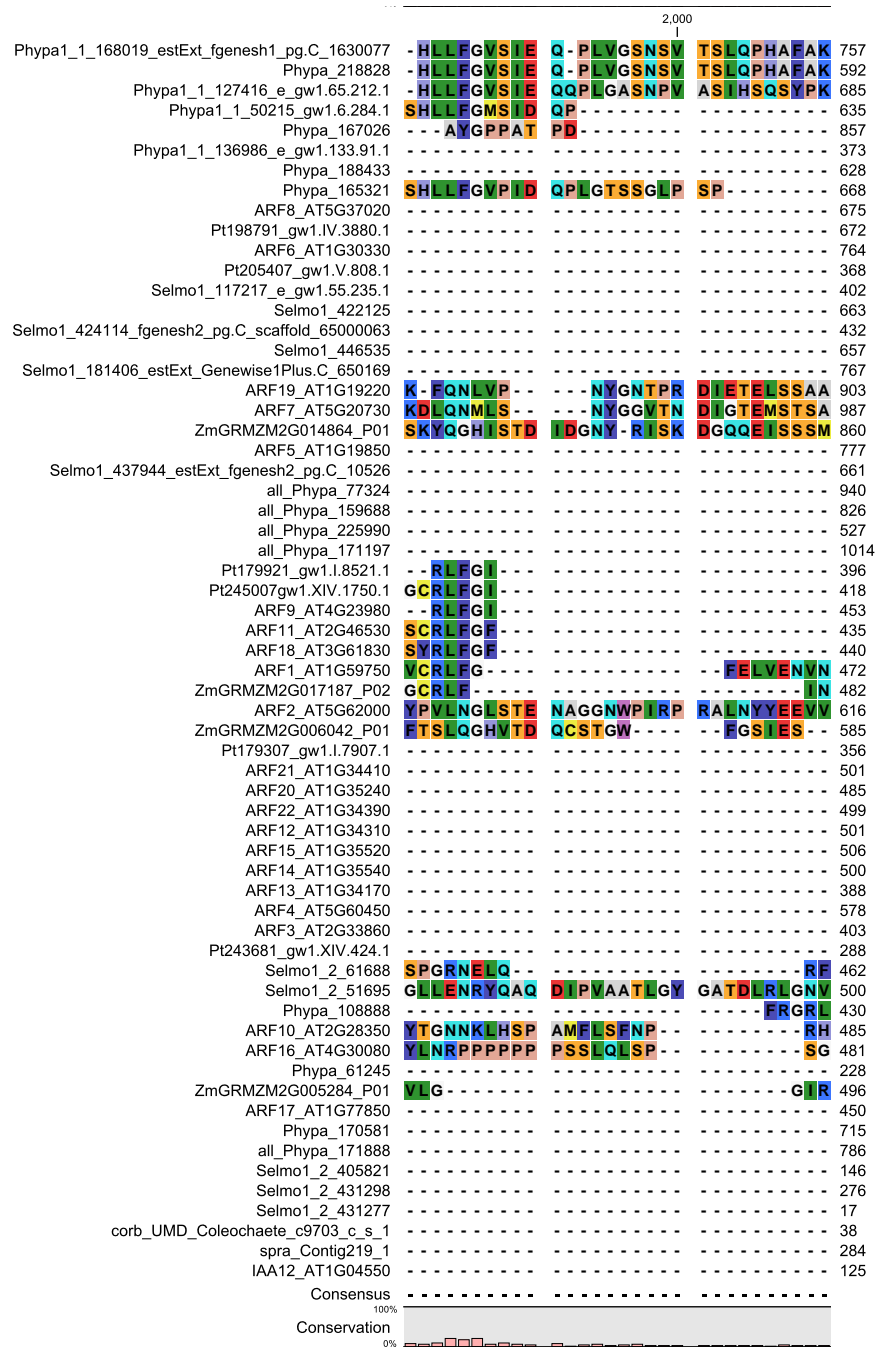

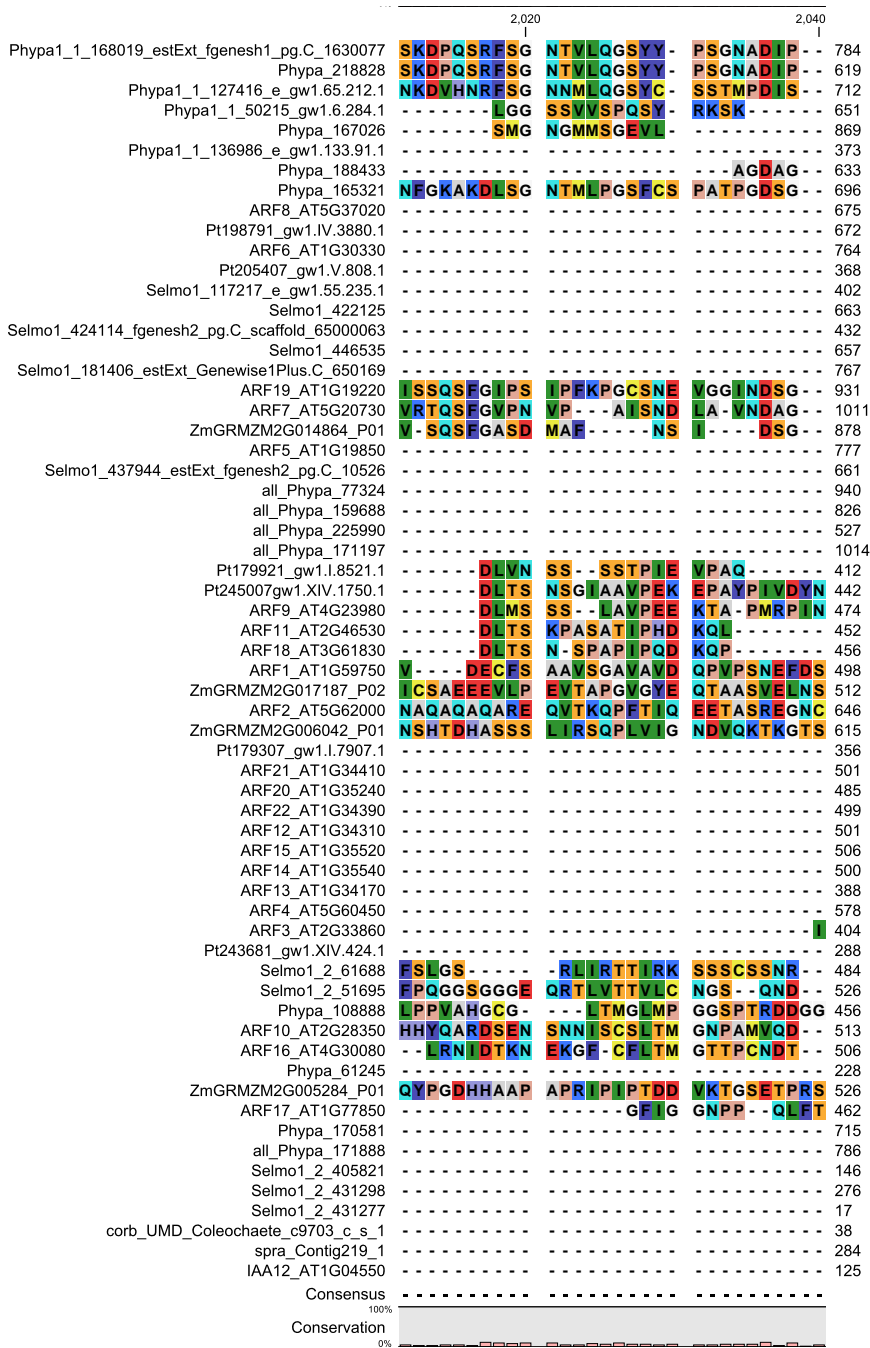



|                                               |               |              |               |       |
|-----------------------------------------------|---------------|--------------|---------------|-------|
| Phypa1_1_168019_estExt_fgenesh1_pg.C_1630077  | -----         | -----        | -----         | 784   |
| Phypa_218828                                  | -----         | -----        | -----         | 619   |
| Phypa1_1_127416_e_gw1.65.212.1                | -----         | -----        | -----         | 712   |
| Phypa1_1_50215_gw1.6.284.1                    | -----         | -----        | -----         | 651   |
| Phypa_167026                                  | -----         | -----        | -----         | 869   |
| Phypa1_1_136986_e_gw1.133.91.1                | -----         | -----        | -----         | 373   |
| Phypa_188433                                  | -----         | -----        | -----         | 633   |
| Phypa_165321                                  | -----         | -----        | -----         | 696   |
| ARF8_AT5G37020                                | -----         | -----        | -----         | 675   |
| Pt198791_gw1.IV.3880.1                        | -----         | -----        | -----         | 672   |
| ARF6_AT1G30330                                | -----         | -----        | -----         | 764   |
| Pt205407_gw1.V.808.1                          | -----         | -----        | -----         | 368   |
| Selmo1_117217_e_gw1.55.235.1                  | -----         | -----        | -----         | 402   |
| Selmo1_422125                                 | -----         | -----        | -----         | 663   |
| Selmo1_424114_fgenesh2_pg.C_scaffold_65000063 | -----         | -----        | -----         | 432   |
| Selmo1_446535                                 | -----         | -----        | -----         | 657   |
| Selmo1_181406_estExt_Genewise1Plus.C_650169   | -----         | -----        | -----         | 767   |
| ARF19_AT1G19220                               | -----         | -----        | -----         | 931   |
| ARF7_AT5G20730                                | -----         | -----        | -----         | 1011  |
| ZmGRMZM2G014864_P01                           | -----         | -----        | -----         | 878   |
| ARF5_AT1G19850                                | -----         | -----        | -----         | 777   |
| Selmo1_437944_estExt_fgenesh2_pg.C_10526      | -----         | -----        | -----         | 661   |
| all_Phypa_77324                               | -----         | -----        | -----         | 940   |
| all_Phypa_159688                              | -----         | -----        | -----         | 826   |
| all_Phypa_225990                              | -----         | -----        | -----         | 527   |
| all_Phypa_171197                              | -----         | -----        | -----         | 1014  |
| Pt179921_gw1.I.8521.1                         | -----         | -----        | -----         | 412   |
| Pt245007gw1.XIV.1750.1                        | GTQ -         | -----        | -----         | 445   |
| ARF9_AT4G23980                                | ISK -         | -----        | -----         | 477   |
| ARF11_AT2G46530                               | -----         | -----        | -----         | 452   |
| ARF18_AT3G61830                               | -----         | -----        | -----         | 456   |
| ARF1_AT1G59750                                | GQQS -        | -----        | -----         | 502   |
| ZmGRMZM2G017187_P02                           | DKLS -        | -----        | -----         | 516   |
| ARF2_AT5G62000                                | RLFGIPLTN     | NMNGTDSTMS   | QRNNNDAAAG    | 675   |
| ZmGRMZM2G006042_P01                           | FKLFGIPL -    | -----        | -----         | G 624 |
| Pt179307_gw1.I.7907.1                         | -----         | -----        | -----         | 356   |
| ARF21_AT1G34410                               | -----         | -----        | -----         | 501   |
| ARF20_AT1G35240                               | -----         | -----        | -----         | 485   |
| ARF22_AT1G34390                               | -----         | -----        | -----         | 499   |
| ARF12_AT1G34310                               | -----         | -----        | -----         | 501   |
| ARF15_AT1G35520                               | -----         | -----        | -----         | 506   |
| ARF14_AT1G35540                               | -----         | -----        | -----         | 500   |
| ARF13_AT1G34170                               | -----         | -----        | -----         | 388   |
| ARF4_AT5G60450                                | QSSGPPSRA     | INFGETRKE    | DAQNEGGLPN    | 607   |
| ARF3_AT2G33860                                | GSSGKPDIP     | VSEGRATDF    | EESLRFQRLV    | 434   |
| Pt243681_gw1.XIV.424.1                        | -----         | -----        | -----         | 288   |
| Selmo1_2_61688                                | TRVSGNVTNN    | TTDMTHKLF    | NVTSTSLRLC    | 514   |
| Selmo1_2_51695                                | SGMSTESSC     | NKQGTFLFG    | KKIETAR - - V | 554   |
| Phypa_108888                                  | SNSKSKLKSS    | PAPITFLFG    | QSIDPSSNSK    | 486   |
| ARF10_AT2G28350                               | --- KKKSVGS   | VKTHQFVLF    | QPILTEQQVM    | 540   |
| ARF16_AT4G30080                               | --- KSK - - - | -KSH - IVLFG | KLILPEEQLS    | 527   |
| Phypa_61245                                   | -----         | -----        | -----         | 228   |
| ZmGRMZM2G005284_P01                           | PSHATKKRDG    | VKPPGIRLFG   | QEILTEEQMK    | 556   |
| ARF17_AT1G77850                               | NNFLSPLPDL    | GKVSSTEMMFG  | SP - PSDNLS   | 490   |
| Phypa_170581                                  | -----         | -----        | -----         | 715   |
| all_Phypa_171888                              | -----         | -----        | -----         | 786   |
| Selmo1_2_405821                               | -----         | -----        | -----         | 146   |
| Selmo1_2_431298                               | -----         | -----        | -----         | 276   |
| Selmo1_2_431277                               | -----         | -----        | -----         | 17    |
| corb_UMD_Coleochaete_c9703_c_s_1              | -----         | -----        | -----         | 38    |
| spra_Contig219_1                              | -----         | -----        | -----         | 284   |
| IAA12_AT1G04550                               | -----         | -----        | -----         | 125   |
| Consensus                                     | -----         | -----        | -----         |       |
| Conservation                                  | -----         | -----        | -----         |       |

|                                             | 2,080 | 2,100        |                   |                     |
|---------------------------------------------|-------|--------------|-------------------|---------------------|
| Phypa1_1_168019_estExt_fgenes1_pg.C_1630077 |       |              | - TMNGVGLDE 793   |                     |
| Phypa_218828                                |       |              | - TMNGVGLDE 628   |                     |
| Phypa1_1_127416_e_gw1.65.212.1              |       |              | - TMNGVGLDE 721   |                     |
| Phypa1_1_50215_gw1.6.284.1                  |       |              | - DD 653          |                     |
| Phypa_167026                                |       |              | - DE 871          |                     |
| Phypa1_1_136986_e_gw1.133.91.1              |       |              | - 373             |                     |
| Phypa_188433                                |       |              | - ILPNEALDE 642   |                     |
| Phypa_165321                                |       |              | - IMPSERIDD 705   |                     |
| ARF8_AT5G37020                              |       |              | - MQD 678         |                     |
| Pt198791_gw1.IV.3880.1                      |       |              | - VQD 675         |                     |
| ARF6_AT1G30330                              |       |              | - IDE 767         |                     |
| Pt205407_gw1.V.808.1                        |       |              | - 368             |                     |
| Selmo1_117217_e_gw1.55.235.1                |       |              | - 402             |                     |
| Selmo1_422125                               |       |              | - LEE 666         |                     |
| Selmo1_424114_fgenes2_pg.C_scaffold_6500063 |       |              | - 432             |                     |
| Selmo1_446535                               |       |              | - 657             |                     |
| Selmo1_181406_estExt_Genewise1Plus.C_650169 |       |              | - 767             |                     |
| ARF19_AT1G19220                             |       |              | - IMNGGGL- 938    |                     |
| ARF7_AT5G20730                              |       |              | - VL - GGGL- 1017 |                     |
| ZmGRMZM2G014864_P01                         |       |              | - MNGGFVNR 886    |                     |
| ARF5_AT1G19850                              |       |              | - 777             |                     |
| Selmo1_437944_estExt_fgenes2_pg.C_10526     |       |              | - 661             |                     |
| all_Phypa_77324                             |       |              | - 940             |                     |
| all_Phypa_159688                            |       |              | - 826             |                     |
| all_Phypa_225990                            |       |              | - 527             |                     |
| all_Phypa_171197                            |       |              | - 1014            |                     |
| Pt179921_gw1.I.8521.1                       |       | LMS          | - ICSVSKKQKP 425  |                     |
| Pt245007gw1.XIV.1750.1                      | G     | LVP          | - ASSEAEKAQT 459  |                     |
| ARF9_AT4G23980                              | P     | TMSHSDPKSE   | - ISKVSSEKKQ 498  |                     |
| ARF11_AT2G46530                             |       | ISVDSN       | - ISDSTTKCQD 468  |                     |
| ARF18_AT3G61830                             |       | MD           | - TCGAAKCE 467    |                     |
| ARF1_AT1G59750                              | E     | PLNINQSDIP   | - SGSGD - 518     |                     |
| ZmGRMZM2G017187_P02                         |       | Q            | PSDVNNSDA         | - AASSE - 532       |
| ARF2_AT5G62000                              |       | LTQIASPKVQ   | - DLS - DQSKGS    | - KSTNDHREQG 704    |
| ZmGRMZM2G006042_P01                         |       | SPEKSEPLVS   | - PPSVAYGKIQ      | - TSPTDNNE - 652    |
| Pt179307_gw1.I.7907.1                       |       |              | - 356             |                     |
| ARF21_AT1G34410                             |       |              | - 501             |                     |
| ARF20_AT1G35240                             |       |              | - 485             |                     |
| ARF22_AT1G34390                             |       |              | - 499             |                     |
| ARF12_AT1G34310                             |       |              | - 501             |                     |
| ARF15_AT1G35520                             |       |              | - 506             |                     |
| ARF14_AT1G35540                             |       |              | - 500             |                     |
| ARF13_AT1G34170                             |       |              | - 388             |                     |
| ARF4_AT5G60450                              |       | NVTADLPFKI   | - DMMGKQKQSE      | - LNMNASSGCK 637    |
| ARF3_AT2G33860                              |       | QGQEIFPGFI   | - NTCSDGG - 451   |                     |
| Pt243681_gw1.XIV.424.1                      |       |              | - 288             |                     |
| Selmo1_2_61688                              |       | QGES - PDSGV | - TNESGSSKWM      | - KEH - - SGADP 541 |
| Selmo1_2_51695                              |       | QEQQ - NSAGS | - SSEATVLSWE      | - KKDRLEGSSS 583    |
| Phypa_108888                                |       | AAQE - QCVAS | - ASSVEGYRQ       | - NE - - GGPWP 512  |
| ARF10_AT2G28350                             |       | NRKRFLLEEA   | - EAEE - -        | - EKGVLVAGLTW 564   |
| ARF16_AT4G30080                             |       | EKGSTDTANI   | - EKTQISSGGS      | - NQNGVLAGREF 557   |
| Phypa_61245                                 |       | - QRLEKEKG   | - SNEALQ -        | - 242               |
| ZmGRMZM2G005284_P01                         |       |              | - 556             |                     |
| ARF17_AT1G77850                             |       | PNSNTTNLSS   | - GN -            | - 502               |
| Phypa_170581                                |       |              | - 715             |                     |
| all_Phypa_171888                            |       |              | - 786             |                     |
| Selmo1_2_405821                             |       |              | - 146             |                     |
| Selmo1_2_431298                             |       |              | - 276             |                     |
| Selmo1_2_431277                             |       |              | - 17              |                     |
| corb_UMD_Coleochaete_c9703_c_s_1            |       |              | - 38              |                     |
| spra_Contig219_1                            |       |              | - 284             |                     |
| IAA12_AT1G04550                             |       |              | - 125             |                     |
| Consensus                                   |       |              |                   |                     |
| Conservation                                | 100%  |              |                   |                     |
|                                             | 0%    |              |                   |                     |

|                                              |             |              |               |      |
|----------------------------------------------|-------------|--------------|---------------|------|
| Phypha1_1_168019_estExt_fgenes1_pg.C_1630077 | NGIFMRNASW  | SAMAPTS--R   | TFTKV-HKLG    | 820  |
| Phypha_218828                                | NGIFMRNASW  | SAMAPTS--R   | TFTKV-HKLG    | 655  |
| Phypha1_1_127416_e_gw1.65.212.1              | NGMCQRGAPW  | ATMSPAP-VR   | TFTKV-HKLG    | 749  |
| Phypha1_1_50215_gw1.6.284.1                  | TGNMMLYVWG  | ITFF--I-YR   | TCEQV-HKLG    | 679  |
| Phypha_167026                                | NGLFQRNTGW  | PPAS--S-QR   | TFTKV-HKLG    | 897  |
| Phypha1_1_136986_e_gw1.133.91.1              | -----       | -----        | -----         | 373  |
| Phypha_188433                                | NIMLQRNVGW  | PAAVATAPPYR  | SFTKV-HKLG    | 671  |
| Phypha_165321                                | NVMIPRGVW   | PTVQPAPPYR   | SFTKV-HKLG    | 734  |
| ARF8_AT5G37020                               | THELLHGAG   | QINSSNQ-TK   | NFVKV-YKSG    | 706  |
| Pt198791_gw1.IV.3880.1                       | SS-ELLSNAG  | QMDPPTP-SG   | TFVKV-YKSG    | 702  |
| ARF6_AT1G30330                               | SG--FLQSSE  | NLGSENPQSN   | TFVKV-YKSG    | 794  |
| Pt205407_gw1.V.808.1                         | -----       | -----        | -----         | 368  |
| Selmo1_117217_e_gw1.55.235.1                 | -----       | -----        | -----         | 402  |
| Selmo1_422125                                | PAYLQRSSSA  | QHMLP---R    | TFTKV-YKTG    | 691  |
| Selmo1_424114_fgenes2_pg.C_scaffold_6500063  | -----       | -----        | -----         | 432  |
| Selmo1_446535                                | -----       | PPVR         | TFTKV-HKVG    | 670  |
| Selmo1_181406_estExt_Genewise1Plus.C_650169  | -----       | SPMR         | TFTKVYKTG     | 781  |
| ARF19_AT1G19220                              | -----       | PNQT--QRMR   | TYTKV-QKRG    | 956  |
| ARF7_AT5G20730                               | -----       | W PAQT--QRMR | TYTKV-QKRG    | 1035 |
| ZmGRMZM2G014864_P01                          | T-----SW    | PPAPPLKRMR   | TFTKV-YKRG    | 908  |
| ARF5_AT1G19850                               | -----       | ATPRVR       | TYTKV-QKTG    | 793  |
| Selmo1_437944_estExt_fgenes2_pg.C_10526      | -----       | -----        | LR TCTKVHLQGA | 673  |
| all_Phypha_77324                             | -----       | PL--VAPVR    | SGTKV-YYSG    | 956  |
| all_Phypha_159688                            | -----       | PP--TVPVR    | SGTKV-NYYG    | 842  |
| all_Phypha_225990                            | -----       | VSQAHAAPMR   | SGIKV-YQQG    | 546  |
| all_Phypha_171197                            | -----       | ATQAHVTPMR   | SGIKV-YQQG    | 1033 |
| Pt179921_gw1.I.8521.1                        | EQLQKSPKEI  | QSKQSSSTSR   | SRTKVQMQG     | 455  |
| Pt245007gw1.XIV.1750.1                       | MDVSMSSKEQ  | KQQGSTTSTR   | TTKKVQMQG     | 489  |
| ARF9_AT4G23980                               | EPAEGSPKEV  | QSKQSS-STR   | SRTKVQMQG     | 527  |
| ARF11_AT2G46530                              | PNSSNSPKEQ  | KQT---STR    | SRTKVQMQGT    | 494  |
| ARF18_AT3G61830                              | PIITPTSMSEQ | KKQ---TSR    | SRTKVQMQG     | 493  |
| ARF1_AT1G59750                               | -PEKSSLRSP  | QES-QSRQIR   | SCTKVHMQGS    | 546  |
| ZmGRMZM2G017187_P02                          | -----RSP    | LES-QSRQVR   | SCTKVIMQGM    | 554  |
| ARF2_AT5G62000                               | RPFQTNPHP   | KDAQTKNSSR   | SCTKVHKQGI    | 734  |
| ZmGRMZM2G006042_P01                          | -PCSEATQNI  | QNKVQSSSTR   | SCKKVHKQGS    | 681  |
| Pt179307_gw1.I.7907.1                        | -----       | -----        | -----         | 356  |
| ARF21_AT1G34410                              | -----       | SSSR         | TCTKVQMQG     | 515  |
| ARF20_AT1G35240                              | -----       | GSTR         | TCTKVQMQG     | 499  |
| ARF22_AT1G34390                              | -----       | SSSR         | TCTKVQMQG     | 513  |
| ARF12_AT1G34310                              | -----       | SSSR         | TCTKVQMQG     | 515  |
| ARF15_AT1G35520                              | -----       | SSSR         | TCTKVQMQG     | 520  |
| ARF14_AT1G35540                              | -----       | SSSR         | TCTKVQMQG     | 514  |
| ARF13_AT1G34170                              | -----       | -----R       | SMNSPISVPE    | 399  |
| ARF4_AT5G60450                               | LGSLPVEVP   | ASKPQSSSKR   | LCTKVHKQGS    | 667  |
| ARF3_AT2G33860                               | -----       | -----A       | GARRGRFKGT    | 462  |
| Pt243681_gw1.XIV.424.1                       | -----       | -----        | -----         | 288  |
| Selmo1_2_61688                               | D-DDG----   | -----V       | IHCKIFFEKE    | 556  |
| Selmo1_2_51695                               | D-EES----   | -----S       | -QCRVFMEESG   | 597  |
| Phypha_108888                                | EISIG----   | -----T       | EHCKVFREED    | 528  |
| ARF10_AT2G28350                              | NYS-----    | -----LQGLET  | GHCKVFMESE    | 583  |
| ARF16_AT4G30080                              | SSSEGSPCSK  | KVHDASGLET   | GHCKVFMEESD   | 587  |
| Phypha_61245                                 | -----       | -----        | -HCKVFREED    | 251  |
| ZmGRMZM2G005284_P01                          | -----       | -----        | -----         | 556  |
| ARF17_AT1G77850                              | -----       | -----        | -----D        | 503  |
| Phypha_170581                                | -----       | -----TR      | SYIKV-YKLG    | 726  |
| all_Phypha_171888                            | -----       | -----TR      | SYIKV-YKLG    | 797  |
| Selmo1_2_405821                              | -----       | -----G       | TSSSK-QDVH    | 156  |
| Selmo1_2_431298                              | -----       | -----R       | TCTKV-HKHG    | 286  |
| Selmo1_2_431277                              | -----       | -----        | -----KHN      | 20   |
| corb_UMD_Coleochaete_c9703_c_s_1             | -----       | -----        | GFVKV-HKEG    | 47   |
| spra_Contig219_1                             | -----       | -----        | -----CKVFEENE | 292  |
| IAA12_AT1G04550                              | -----       | -----        | -----VKVNMDSV | 133  |

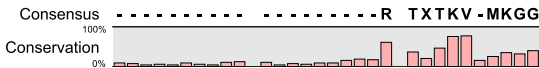

|                                              | 2,140       | 2,160        |                  |
|----------------------------------------------|-------------|--------------|------------------|
| Phypha1_1_168019_estExt_fgenes1_pg.C_1630077 | SVGRSIDVQK  | - FQNYSELRY  | ELARLFNLEG 849   |
| Phypha_218828                                | SVGRSIDVQK  | - FQNYSELRY  | ELARLFNLEG 684   |
| Phypha1_1_127416_e_gw1.65.212.1              | SVGRSIDVQK  | - FQNYSELRA  | ELARLFNLDN 778   |
| Phypha1_1_50215_gw1.6.284.1                  | SVGRSLDVRN  | - FSNYTELRQ  | ELARRFQLDC 708   |
| Phypha_167026                                | SVGRSLDVRN  | - FNTYAELRK  | ELAKMFHLDC 926   |
| Phypha1_1_136986_e_gw1.133.91.1              | -----       | -----        | ----- 373        |
| Phypha_188433                                | SVGRSLDINK  | - FSNYVELRK  | ELAHMFHLEC 700   |
| Phypha_165321                                | SVGRSLDINK  | - FSNYAELRK  | ELAHMFHLEC 763   |
| ARF8_AT5G37020                               | SVGRSLDISR  | - FSSYELRE - | ELGKMFATIEG 734  |
| Pt198791_gw1.IV.3880.1                       | SVGRSLDISR  | - FSSYHELRL  | ELAQMFETIEG 730  |
| ARF6_AT1G30330                               | SVGRSLDISK  | - FSSYHELRS  | ELARMFGLIEG 822  |
| Pt205407_gw1.V.808.1                         | -----       | -----        | ----- 368        |
| Selmo1_117217_e_gw1.55.235.1                 | -----       | -----        | ----- 402        |
| Selmo1_422125                                | SVGRSLDLTR  | - LNCYDGLRS  | ELARMFGLIEG 720  |
| Selmo1_424114_fgenes2_pg.C_scaffold_6500063  | -----       | -----        | ----- 432        |
| Selmo1_446535                                | SVGRSLDLTR  | - FKNYHELRLN | ELTRMFGLIE - 698 |
| Selmo1_181406_estExt_Genewise1Plus.C_650169  | SVGRSIDVTR  | - LKNYEELRR  | DIARMFNLEG 810   |
| ARF19_AT1G19220                              | SVGRI-DVTR  | - YSGYDELRRH | DLARMFGLIEG 984  |
| ARF7_AT5G20730                               | SVGRS-DVNR  | - YRGYDELRRH | DLARMFGLIEG 1063 |
| ZmGRMZM2G014864_P01                          | AVGRSIDLSQ  | - FSGYDELKH  | ALARMFGLIEG 937  |
| ARF5_AT1G19850                               | SVGRSIDTS - | - FKDYEELKS  | AIETCMFGLIEG 821 |
| Selmo1_437944_estExt_fgenes2_pg.C_10526      | AVGRAVDLSK  | - FSCYSELLL  | ELQQLFGLDN 702   |
| all_Phypha_77324                             | KVGRIDLKK   | - CESYAALRR  | MLASLFGLEG 985   |
| all_Phypha_159688                            | KFGRTVDLKK  | - CDSYAALRR  | MLATLFGLEG 871   |
| all_Phypha_225990                            | KVGRIDLKK   | - CESYDGLRR  | VLANLFLNQG 575   |
| all_Phypha_171197                            | KVGRIDLKK   | - CESYTGRR   | VLANLFLNQG 1062  |
| Pt179921_gw1.I.8521.1                        | AVGRAVDLTM  | - LKGYSQLID  | ELEQLF - IKG 483 |
| Pt245007gw1.XIV.1750.1                       | AVGRALDLTV  | - LKGYKDLIN  | ELEKMFETGG 518   |
| ARF9_AT4G23980                               | PVGRAVDLNA  | - LKGYNELID  | DIEKLFDIKG 556   |
| ARF11_AT2G46530                              | AVGRAVDLTL  | - LRSYDELK   | ELEKMFETIEG 523  |
| ARF18_AT3G61830                              | AVGRAVDLTL  | - LKSYDELID  | ELEEMFETIEG 522  |
| ARF1_AT1G59750                               | AVGRAIDLTR  | - SECY-DLTK  | KLEEMFDIKG 574   |
| ZmGRMZM2G017187_P02                          | AVGRAV-LTK  | - LSGYSDLCQ  | KLEEMFDIQG 582   |
| ARF2_AT5G62000                               | AVGRSVDLSK  | - FQNYEELVA  | ELDRLEFENFG 763  |
| ZmGRMZM2G006042_P01                          | AVGRSVDLTK  | - FACVDELVA  | ELDQMFDFDQ 710   |
| Pt179307_gw1.I.7907.1                        | -----       | -----        | ---NMATSSA 363   |
| ARF21_AT1G34410                              | TIGRAVDLSV  | - LNGYDQLIL  | ELEKLFDIKG 544   |
| ARF20_AT1G35240                              | TIGRAVDLSV  | - LNGYDQLIL  | ELEKLFDLKG 528   |
| ARF22_AT1G34390                              | TIGRAVDLSV  | - LNGYDQLIL  | ELEEFLDLKG 542   |
| ARF12_AT1G34310                              | TIGRAVDLSV  | - LNGYDQLIL  | ELEKLFDIKG 544   |
| ARF15_AT1G35520                              | TIGRAVDLSV  | - LNGYDQLIL  | ELEKLFDLKG 549   |
| ARF14_AT1G35540                              | TIGRAVDLSV  | - LNGYDQLIL  | ELEKLFDLKG 543   |
| ARF13_AT1G34170                              | FYPNAIEDSK  | - FLSGLLLNH  | SLLAIPN-EN 427   |
| ARF4_AT5G60450                               | QVGRAIDLRS  | - LNGYDDLIM  | ELERLFNMEG 696   |
| ARF3_AT2G33860                               | EEGDSYGFHK  | VLQGGQETVAY  | SITDHRQQHG 492   |
| Pt243681_gw1.XIV.424.1                       | -----       | -----        | ----- 288        |
| Selmo1_2_61688                               | EVGRTLDSL   | - FGNYEELYD  | RLASMFMTMD - 584 |
| Selmo1_2_51695                               | DVKRTLDSL   | - FGSYDELYK  | QLATVFCVD - 625  |
| Phypha_108888                                | EVGRTLDLAN  | - FKSYYEYVD  | RLAGMFSVP - 556  |
| ARF10_AT2G28350                              | DVGRTLDSL   | - IGSYQELYR  | KLAEMFHIEE 612   |
| ARF16_AT4G30080                              | DVGRTLDSL   | - LGSYEELSR  | KLSDMFGIK - 615  |
| Phypha_61245                                 | EVGRTLDLAN  | - FKSYYEYVD  | RLAGMFSVP - 279  |
| ZmGRMZM2G005284_P01                          | -----       | - GSHDKATN   | NTSGRSGAPE 574   |
| ARF17_AT1G77850                              | LVGNRGPISK  | - KVNISQLFG  | KIITVEEHSE 532   |
| Phypha_170581                                | SITRAVDVNR  | - FKDYTELRC  | ELARMFNLDG 755   |
| all_Phypha_171888                            | SITRAVDVNR  | - FKDYTELRC  | ELARMFNLDG 826   |
| Selmo1_2_405821                              | QMGRALDLRK  | - FRGYRELE   | ELQHLFGIDK 185   |
| Selmo1_2_431298                              | AVGRALDLPK  | - FRGYRELE   | ELQHLFGIDE 315   |
| Selmo1_2_431277                              | AVGRALDLSK  | - FRGYTQLLE  | EPQHLFGIDE 49    |
| corb_UMD_Coleochaete_c9703_c_s_1             | SIGRSLDLSK  | - FRGYNELRT  | EINLFLGLHG 76    |
| spra_Contig219_1                             | SVGRSVDLAR  | - CHSHDELAC  | HLASFRMNP 321    |
| IAA12_AT1G04550                              | GIVGRKVDL-R | AHSSYENLAQ   | TLEEMF - - - 158 |

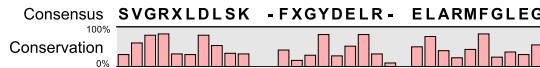

|                                              |                     |                     |                     |         |
|----------------------------------------------|---------------------|---------------------|---------------------|---------|
| Phypha1_1_168019_estExt_fgenes1_pg.C_1630077 | - L L D D P Q R S G | W Q L V F V D N E N | D T L L V G D D     | -- 876  |
| Phypha_218828                                | - L L D D P Q R S G | W Q L V F V D N E N | D T L L V G D D     | -- 711  |
| Phypha1_1_127416_e_gw1.65.212.1              | - L L D D P Q R T G | W Q L V F V D N E N | D T L L V G D D     | -- 805  |
| Phypha1_1_50215_gw1.6.284.1                  | - L M E D P S S S G | W Q L V F V D N E D | D T L L V G D D     | -- 735  |
| Phypha_167026                                | - L M E D P P T S G | W Q L V F V D N E N | D T L L V G D D     | -- 953  |
| Phypha1_1_136986_e_gw1.133.91.1              | -----               | -----               | -----               | 373     |
| Phypha_188433                                | - L M E D S Q Q S S | W K L V F V D N E N | D T L L L G D E     | -- 727  |
| Phypha_165321                                | - L M E D P Q Q S D | W L I V Y V D N E N | D T L L L G D G     | -- 790  |
| ARF8_AT5G37020                               | - L L E D P L R S G | W Q L V F V D K E N | D I L L L G D D     | -- 761  |
| Pt198791_gw1.IV.3880.1                       | - K L E N P H R S G | W Q L V F V D R E N | D V L L L G D D     | -- 757  |
| ARF6_AT1G30330                               | - Q L E D P V R S G | W Q L V F V D R E N | D V L L L G D D     | -- 849  |
| Pt205407_gw1.V.808.1                         | -----               | -----               | -----               | 368     |
| Selmo1_117217_e_gw1.55.235.1                 | -----               | -----               | -----               | 402     |
| Selmo1_422125                                | - Q L E D P H R S G | W Q L V F V D N E N | D V L L V G D D     | -- 747  |
| Selmo1_424114_fgenes2_pg.C_scaffold_6500063  | -----               | -----               | -----               | 432     |
| Selmo1_446535                                | --- L H D H K S G   | W Q L V F I D N E N | D M L L L G D D     | -- 722  |
| Selmo1_181406_estExt_Genewise1Plus.C_650169  | Q L L M D S C R S S | W Q L V F V D Y E G | D V L L V G D D     | -- 838  |
| ARF19_AT1G19220                              | Q - L E D P L T S D | W K L V Y T D H E N | D I L L V G D D     | -- 1011 |
| ARF7_AT5G20730                               | Q - L E D P Q T S D | W K L V Y T D H E N | D I L L V G D D     | -- 1090 |
| ZmGRMZM2G014864_P01                          | Q - L E E R Q R I G | W K L V Y K D H E D | D I L L - G D D     | -- 963  |
| ARF5_AT1G19850                               | - L L T H P Q S S G | W K L V Y V D Y E S | D V L L V G D D     | -- 848  |
| Selmo1_437944_estExt_fgenes2_pg.C_10526      | A L - - D D P D S G | W Q V V Y T D N E G | D M L L V G D D     | -- 728  |
| all_Phypha_77324                             | Q L - - D D V T K G | W Q L V Y T D H E N | D V L L V G D D     | -- 1011 |
| all_Phypha_159688                            | Q L - - D D V T K G | W Q L V Y T D H E N | D V L L V G D D     | -- 897  |
| all_Phypha_225990                            | Q L - - D D V T K G | W Q L V Y T D H E N | D V L L V G D D     | -- 601  |
| all_Phypha_171197                            | Q L - - D D V T K G | W Q L V Y T D H E N | D V L L V G D D     | -- 1088 |
| Pt179921_gw1.I.8521.1                        | Q L - - H P R D K   | W E I V Y T D D E G | D M M L V G D D     | -- 508  |
| Pt245007gw1.XIV.1750.1                       | E L - - S T R E K   | W A V V F T D N E G | D M M L V G D D     | -- 543  |
| ARF9_AT4G23980                               | E L - - R S - N Q   | W E V F T D D E G   | D M M L V G D D     | -- 580  |
| ARF11_AT2G46530                              | E L - - S P K D K   | W A I V F T D D E G | D R M L V G D D     | -- 548  |
| ARF18_AT3G61830                              | Q L - - L A R D K   | W I V V F T D D E G | D M M L A G D D     | -- 547  |
| ARF1_AT1G59750                               | E L - - L E S T K K | W Q V V Y T D D E D | D M M M V G D D     | -- 600  |
| ZmGRMZM2G017187_P02                          | E L - - G S T L K K | W R V I F T D D E D | D M M L V G D D     | -- 608  |
| ARF2_AT5G62000                               | E L - - M A P K K D | W L V V Y T D E E N | D M M L V G D D     | -- 789  |
| ZmGRMZM2G006042_P01                          | E L - - K S P C R N | W L - Y Y T D N E G | D M M L V G D D     | -- 735  |
| Pt179307_gw1.I.7907.1                        | D S - - S A P T K K | -----               | -----               | 371     |
| ARF21_AT1G34410                              | Q L - - Q T R N Q   | W K I A F T D S D   | Y E M L V G D D     | -- 568  |
| ARF20_AT1G35240                              | Q L - - Q T R N Q   | W K I A F T D S D G | Y E M L V G D D     | -- 553  |
| ARF22_AT1G34390                              | Q L - - Q T R N Q   | W E I A F T D S D D | - D M L V G D D     | -- 566  |
| ARF12_AT1G34310                              | Q L - - Q T R N Q   | W E I A F T D S D D | - K M L V G D D     | -- 568  |
| ARF15_AT1G35520                              | Q L - - Q T R N Q   | W K I - I T G S D E | D E M L V G D D     | -- 573  |
| ARF14_AT1G35540                              | Q L - - Q A R N Q   | W E I A F T N N E E | - K M L V G E D     | -- 567  |
| ARF13_AT1G34170                              | Y N S D Q M I Q P R | K E D I T T E A T T | S C L L F G V D L T | 457     |
| ARF4_AT5G60450                               | L L R - - D P E K G | W R I L Y T D S E N | D M M V V G D       | -- 721  |
| ARF3_AT2G33860                               | L - - - S Q R N I   | W - - - - - - - - - | - - - - - C G       | 501     |
| Pt243681_gw1.XIV.424.1                       | -----               | -----               | -----               | 288     |
| Selmo1_2_61688                               | ----- K S K L S     | GR V V Y R D L E G  | S T I Y G G E       | -- 607  |
| Selmo1_2_51695                               | ----- M A K L S     | GR V V Y K D S E G  | S T I H T G G E     | -- 648  |
| Phypha_108888                                | ----- A A S F K     | NR V V Y Q D G E G  | C T L P V G A E     | -- 579  |
| ARF10_AT2G28350                              | ----- R S D L L     | TH V V Y R D A N G  | V I K R I G D E     | -- 635  |
| ARF16_AT4G30080                              | ----- K S E M L     | S S V L Y R D A S G | A I K Y A G N E     | -- 638  |
| Phypha_61245                                 | ----- A A S F K     | NR V V Y Q D G E G  | C T L P V G A E     | -- 302  |
| ZmGRMZM2G005284_P01                          | -----               | -----               | - - - - - F G L E   | 578     |
| ARF17_AT1G77850                              | ----- S G P A E     | S G L C E E D G S K | E S S D N E T Q     | -- 555  |
| Phypha_170581                                | Q L - - D P T V G   | W Q L V F T D N E D | D L L L V G D D     | -- 780  |
| all_Phypha_171888                            | Q L - - D P K V G   | W Q L V F T D N E D | D L L L V G D D     | -- 851  |
| Selmo1_2_405821                              | N L - - - N G S E   | W Q A V Y V D N E G | D M L L V G D D P W | 211     |
| Selmo1_2_431298                              | N L - - - N V A S   | -----               | -----               | 321     |
| Selmo1_2_431277                              | N L - - - N E S E   | W Q A M Y V D N E G | D M L F V G E G V G | 75      |
| corb_UMD_Coleochaete_c9703_c_s_1             | ----- D E V D N     | W M Y V F V D N D G | D R L L L G D D     | -- 99   |
| spra_Contig219_1                             | R D V I D           | - R L V F H D A N S | E W L A S S         | -- 343  |
| IAA12_AT1G04550                              | -----               | -----               | -----               | 158     |

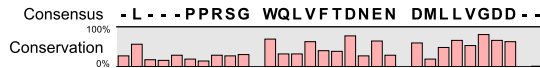

|                                              | 2,200           | 2,220        |                        |
|----------------------------------------------|-----------------|--------------|------------------------|
| Phypha1_1_168019_estExt_fgenes1_pg.C_1630077 | PWEEFVNC        | VRSLKILSPN   | EILQMSQEQI 904         |
| Phypha_218828                                | PWEEFVNC        | VRSLKILSPN   | EILQMSQEQI 739         |
| Phypha1_1_127416_e_gw1.65.212.1              | PWEEFVNY        | VRSLKILSPN   | EILQMSRQEQI 833        |
| Phypha1_1_50215_gw1.6.284.1                  | PWEEFAKF        | VKTKILSPS    | EVAQ - - - - 757       |
| Phypha_167026                                | PWEDFLNC        | VRSLKILSPS   | EVTQISQDQL 981         |
| Phypha1_1_136986_e_gw1.133.91.1              | - - - - -       | - - - - -    | - - - - - 373          |
| Phypha_188433                                | PWEEFVSC        | VRSLKILSPA   | EVAQMNQHYL 755         |
| Phypha_165321                                | PWEEAFVSC       | VRSLKILSPV   | EVAQMSQEMP 818         |
| ARF8_AT5G37020                               | PWEEFVNN        | VWYIKILSPE   | DVHQMGDHEE 789         |
| Pt198791_gw1.IV.3880.1                       | PWEEFVNN        | VWYIKILSPE   | DVLKIGEQG- 784         |
| ARF6_AT1G30330                               | PWEEFVSS        | VWCIKILSPQ   | EVQQMGKRG 877          |
| Pt205407_gw1.V.808.1                         | - - - - -       | - - - - -    | - - - - - 368          |
| Selmo1_117217_e_gw1.55.235.1                 | - - - - -       | - - - - -    | - - - - - 402          |
| Selmo1_422125                                | PWEEFVSC        | VRCLKIMSPA   | ELSHMNQEQI 775         |
| Selmo1_424114_fgenes2_pg.C_scaffold_6500063  | - - - - -       | - - - - -    | - - - - - 432          |
| Selmo1_446535                                | PWDEFVGC        | VKSLRILSSS   | EILQMNQEHM 750         |
| Selmo1_181406_estExt_Genewise1Plus.C_650169  | PWEEFVGC        | VRFLKILSPS   | EVQQNRENEL 866         |
| ARF19_AT1G19220                              | PWEEFVNC        | VQNLIKILSSV  | EVQQMSLDGD 1039        |
| ARF7_AT5G20730                               | PWEEFVNC        | VQSILKILSSA  | EVQQMSLDGN 1118        |
| ZmGRMZM2G014864_P01                          | PWEEFVNC        | VKCLRILSPQ   | EVQQSLDGDG 991         |
| ARF5_AT1G19850                               | PWEEFVGC        | VRCLRILSPT   | EVQQMSEEGM 876         |
| Selmo1_437944_estExt_fgenes2_pg.C_10526      | PWQEFVNC        | VRNIRILSPA   | EVEKLTQ - - - 753      |
| all_Phypha_77324                             | PWEEFCNC        | VRSLKILSPQ   | DAAGQS - - - 1035      |
| all_Phypha_159688                            | PWEEFCNC        | VRSLKILSPQ   | DAAGQN - - - 921       |
| all_Phypha_225990                            | PWEEFCGC        | VRSLKILSPQ   | DAAGQT - - - 625       |
| all_Phypha_171197                            | PWEEFCGC        | VRSLKILSPQ   | DVAGQS - - - 1112      |
| Pt179921_gw1.I.8521.1                        | PWPEFCNM        | VRRIYICSSQ   | DVKRM - - - 531        |
| Pt245007gw1.XIV.1750.1                       | PWPFECKM        | VKKIFLYSSE   | -VKKMS - - - 566       |
| ARF9_AT4G23980                               | PWPFECKM        | VKRIFLWSKE   | EVKKMT - - - 604       |
| ARF11_AT2G46530                              | PWNEFCMK        | AKKLI-YPSD   | EVKKMR - - - 571       |
| ARF18_AT3G61830                              | PWNEFCMK        | AKKIF-YSSD   | EVKKMT - - - 570       |
| ARF1_AT1G59750                               | PWNEFCGM        | VRKIFLYTPE   | EVKKLS - - - 624       |
| ZmGRMZM2G017187_P02                          | PWE - - - -     | - - - - -    | - - - - - 611          |
| ARF2_AT5G62000                               | PWQEFCCM        | VRKIFLYTKE   | EVRKMN - - - 812       |
| ZmGRMZM2G006042_P01                          | PWNEFCDM        | VHKIFLYTRE   | EVERMN - - - 759       |
| Pt179307_gw1.I.7907.1                        | - - - - -       | - - - - -    | - - - - - 371          |
| ARF21_AT1G34410                              | PWPFECKM        | VKKILLYSKE   | EVKNLKSS - - 594       |
| ARF20_AT1G35240                              | PWPFECK - -     | VKKILLYSKE   | EVKNLKSS - - 578       |
| ARF22_AT1G34390                              | PWPFCNM - -     | VKKILFKRG    | - - - - - GQ - - - 586 |
| ARF12_AT1G34310                              | PWPFCNM - -     | VKKIFLQKR -  | - - - - - 585          |
| ARF15_AT1G35520                              | PWPFCNM - -     | VKRIYIQR -   | - - - - - 590          |
| ARF14_AT1G35540                              | PWPFCNM - -     | VKKIFLYSKE   | EVKNLKSR - - 593       |
| ARF13_AT1G34170                              | KVSKSKDS -      | ICPLSCKKS    | EISKLNQKAT 485         |
| ARF4_AT5G60450                               | PWHDFCNV -      | VWKHLLYTKE   | EVENANDDNK 749         |
| ARF3_AT2G33860                               | PEQNFSTR -      | LLPPSVSSSP   | S - - - - - 520        |
| Pt243681_gw1.XIV.424.1                       | - - - - -       | - - - - -    | - - - - - 288          |
| Selmo1_2_61688                               | PYGNFVKS -      | VRRLTIL - -  | - - - - - 622          |
| Selmo1_2_51695                               | PYANFVKS -      | VRRLTIL - -  | - - - - - 663          |
| Phypha_108888                                | PYGNFVAA -      | VRRLTIL - -  | - - - - - 594          |
| ARF10_AT2G28350                              | PF - SDFKA -    | TKRLLKMD -   | - - - - - 652          |
| ARF16_AT4G30080                              | PF - EFLKT -    | ARRLTIL - -  | - - - - - 652          |
| Phypha_61245                                 | PYGNFVAA -      | VRRLTIL - -  | - - - - - 317          |
| ZmGRMZM2G005284_P01                          | P - - - - -     | - - - - -    | - - - - - 579          |
| ARF17_AT1G77850                              | LSLSHPPS -      | VPKHS - - -  | - - - - - 568          |
| Phypha_170581                                | PWDEFVRN -      | VRGRLILTPA   | EVYFYTNEEK 808         |
| all_Phypha_171888                            | PWEEFVRN -      | VRGRLILTPA   | EVYFYTNEEK 879         |
| Selmo1_2_405821                              | GMEFTFQGV -     | LHDGAMHSAA   | EIQKLTVRAR 239         |
| Selmo1_2_431298                              | - - - - RGV - - | LHDGAMHSAA   | EIQKLTVRAR 344         |
| Selmo1_2_431277                              | RFAAFASLHP      | RKRLLIATQK   | GASETSK - - - 102      |
| corb_UMD_Coleochaete_c9703_c_s_1             | PWDNFVVCXA      | QHP - - - -  | - - - - - 112          |
| spra_Contig219_1                             | PYEKL - - MET   | AKRAMILSS -  | - - - - - 360          |
| IAA12_AT1G04550                              | - - - GTGLYCFQ  | MRTL - - -   | - - - - - 172          |
| Consensus                                    | PWEEFVNC - -    | VRKILKILSP - | EV - - - - -           |

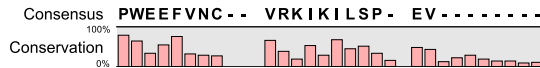

|                                             |                     |                     |                     |      |
|---------------------------------------------|---------------------|---------------------|---------------------|------|
| Phypa1_1_168019_estExt_fgenes1_pg.C_1630077 | E L L N S V P M Q - | - - - Q R P T C S N | S E D A R T Q T S P | 930  |
| Phypa_218828                                | E L L N S V P M Q - | - - - Q R P T C S N | S E D A R T Q T S P | 765  |
| Phypa1_1_127416_e_gw1.65.212.1              | E L L N T V P M Q - | - - - Q R P T C S N | S E D A R T Q T S P | 859  |
| Phypa1_1_50215_gw1.6.284.1                  | -----               | -----               | -----               | 757  |
| Phypa_167026                                | K M L E T V P V Q H | L Q P Q R L I S S D | S G E V Y P Q S S L | 1011 |
| Phypa1_1_136986_e_gw1.133.91.1              | -----               | -----               | -----               | 373  |
| Phypa_188433                                | A A W - - - - - S   | G Q H L R P S N S N | S E D T P S S Q A - | 778  |
| Phypa_165321                                | A A W - - - - - L   | G Q Q L R P S N S N | S E D A P N S Q A - | 841  |
| ARF8_AT5G37020                              | G S G G L F P Q N - | -----               | -----               | 798  |
| Pt198791_gw1.IV.3880.1                      | -----               | -----               | -----               | 784  |
| ARF6_AT1G30330                              | E L L S A P S S N - | -----               | -----               | 886  |
| Pt205407_gw1.V.808.1                        | -----               | -----               | -----               | 368  |
| Selmo1_117217_e_gw1.55.235.1                | -----               | -----               | -----               | 402  |
| Selmo1_422125                               | N A L Q A - - - -   | -----               | -----               | 780  |
| Selmo1_424114_fgenes2_pg.C_scaffold_6500063 | -----               | -----               | -----               | 432  |
| Selmo1_446535                               | E W L N S I P L H Q | Q Q K Q A S S S S D | D H R P C G D V P A | 780  |
| Selmo1_181406_estExt_Genewise1Plus.C_650169 | E S L A A V P - - - | N Q R Q T S S S S D | D - - - - - - - -   | 884  |
| ARF19_AT1G19220                             | L A - - - I P T I N | Q A C S E T D S G N | A W K V H Y E D T S | 1066 |
| ARF7_AT5G20730                              | F A - - - V P V T N | Q A C S G G D S G N | A W R G H Y D D N S | 1145 |
| ZmGRMZM2G014864_P01                         | L G N I L P - - - N | Q A C S S S D G G N | A W R A R C D Q N S | 1019 |
| ARF5_AT1G19850                              | K L L N A - - - -   | -----               | -----               | 881  |
| Selmo1_437944_estExt_fgenes2_pg.C_10526     | -----               | -----               | -----               | 753  |
| all_Phypa_77324                             | -----               | -----               | -----               | 1035 |
| all_Phypa_159688                            | -----               | -----               | -----               | 921  |
| all_Phypa_225990                            | -----               | -----               | -----               | 625  |
| all_Phypa_171197                            | -----               | -----               | -----               | 1112 |
| Pt179921_gw1.I.8521.1                       | -----               | -----               | -----               | 531  |
| Pt245007gw1.XIV.1750.1                      | -----               | -----               | -----               | 566  |
| ARF9_AT4G23980                              | -----               | -----               | -----               | 604  |
| ARF11_AT2G46530                             | -----               | -----               | -----               | 571  |
| ARF18_AT3G61830                             | -----               | -----               | -----               | 570  |
| ARF1_AT1G59750                              | -----               | -----               | -----               | 624  |
| ZmGRMZM2G017187_P02                         | -----               | -----               | -----               | 611  |
| ARF2_AT5G62000                              | -----               | -----               | -----               | 812  |
| ZmGRMZM2G006042_P01                         | -----               | -----               | -----               | 759  |
| Pt179307_gw1.I.7907.1                       | -----               | -----               | -----               | 371  |
| ARF21_AT1G34410                             | -----               | -----               | -----               | 594  |
| ARF20_AT1G35240                             | -----               | -----               | -----               | 578  |
| ARF22_AT1G34390                             | -----               | -----               | -----               | 586  |
| ARF12_AT1G34310                             | -----               | -----               | -----               | 585  |
| ARF15_AT1G35520                             | -----               | -----               | -----               | 590  |
| ARF14_AT1G35540                             | -----               | -----               | -----               | 593  |
| ARF13_AT1G34170                             | T S C L K I K S L T | K P N E -           | -----               | 500  |
| ARF4_AT5G60450                              | S C L E Q A A L M M | E A S K S S S V S Q | P D S S P T I T R V | 779  |
| ARF3_AT2G33860                              | -----               | -----               | -----               | 520  |
| Pt243681_gw1.XIV.424.1                      | -----               | -----               | -----               | 288  |
| Selmo1_2_61688                              | -----               | -----               | -----               | 622  |
| Selmo1_2_51695                              | -----               | -----               | -----               | 663  |
| Phypa_108888                                | -----               | -----               | -----               | 594  |
| ARF10_AT2G28350                             | -----               | -----               | -----               | 652  |
| ARF16_AT4G30080                             | -----               | -----               | -----               | 652  |
| Phypa_61245                                 | -----               | -----               | -----               | 317  |
| ZmGRMZM2G005284_P01                         | -----               | -----               | -----               | 579  |
| ARF17_AT1G77850                             | -----               | -----               | -----               | 568  |
| Phypa_170581                                | C T A A A Y N S T G | G S A P K P M - - - | -----               | 825  |
| all_Phypa_171888                            | C T A A A Y N P A G | G S A P K P M - - - | -----               | 896  |
| Selmo1_2_405821                             | N S S T E E P S S R | L S D Q Q D S S S   | -----               | 258  |
| Selmo1_2_431298                             | N S S T E E P S S R | L S D Q Q D S S S   | -----               | 363  |
| Selmo1_2_431277                             | -----               | -----               | -----               | 102  |
| corb_UMD_Coleochaete_c9703_c_s_1            | -----               | -----               | -----               | 112  |
| spra_Contig219_1                            | -----               | -----               | -----               | 360  |
| IAA12_AT1G04550                             | -----               | -----               | -----               | 172  |

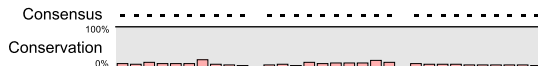





|                                              |                   |                   |                   |      |
|----------------------------------------------|-------------------|-------------------|-------------------|------|
| Phypa1_1_168019_estExt_fgenes1_pg.C_1630077  | <b>CKATPLSQVL</b> | <b>IAADSVARRS</b> | <b>FGLAANLKRS</b> | 990  |
| Phypa_218828                                 | -----             | -----             | -----             | 776  |
| Phypa1_1_127416_e_gw1.65.212.1               | -----             | -----             | -----             | 870  |
| Phypa1_1_50215_gw1.6.284.1                   | -----             | -----             | -----             | 758  |
| Phypa_167026                                 | -----             | -----             | -----             | 1018 |
| Phypa1_1_136986_e_gw1.133.91.1               | -----             | -----             | -----             | 373  |
| Phypa_188433                                 | -----             | -----             | -----             | 778  |
| Phypa_165321                                 | -----             | -----             | -----             | 841  |
| ARF8_AT5G37020                               | -----             | -----             | -----             | 798  |
| Pt198791_gw1.IV.3880.1                       | -----             | -----             | -----             | 784  |
| ARF6_AT1G30330                               | -----             | -----             | -----             | 886  |
| Pt205407_gw1.V.808.1                         | -----             | -----             | -----             | 368  |
| Selmo1_117217_e_gw1.55.235.1                 | -----             | -----             | -----             | 402  |
| Selmo1_422125                                | -----             | -----             | -----             | 780  |
| Selmo1_424114_fgenes2_pg.C_scaffold_65000063 | -----             | -----             | -----             | 432  |
| Selmo1_446535                                | <b>SSVNSDPSCV</b> | <b>SDG</b>        | -----             | 824  |
| Selmo1_181406_estExt_Genewise1Plus.C_650169  | <b>YHHRPDFC</b>   | -----             | -----             | 908  |
| ARF19_AT1G19220                              | -----             | -----             | -----             | 1073 |
| ARF7_AT5G20730                               | -----             | -----             | -----             | 1151 |
| ZmGRMZM2G014864_P01                          | -----             | -----             | -----             | 1029 |
| ARF5_AT1G19850                               | -----             | -----             | -----             | 881  |
| Selmo1_437944_estExt_fgenes2_pg.C_10526      | -----             | -----             | -----             | 753  |
| all_Phypa_77324                              | -----             | -----             | -----             | 1035 |
| all_Phypa_159688                             | -----             | -----             | -----             | 921  |
| all_Phypa_225990                             | -----             | -----             | -----             | 625  |
| all_Phypa_171197                             | -----             | -----             | -----             | 1112 |
| Pt179921_gw1.I.8521.1                        | -----             | -----             | -----             | 531  |
| Pt245007gw1.XIV.1750.1                       | -----             | -----             | -----             | 566  |
| ARF9_AT4G23980                               | -----             | -----             | -----             | 604  |
| ARF11_AT2G46530                              | -----             | -----             | -----             | 571  |
| ARF18_AT3G61830                              | -----             | -----             | -----             | 570  |
| ARF1_AT1G59750                               | -----             | -----             | -----             | 624  |
| ZmGRMZM2G017187_P02                          | -----             | -----             | -----             | 611  |
| ARF2_AT5G62000                               | -----             | -----             | -----             | 812  |
| ZmGRMZM2G006042_P01                          | -----             | -----             | -----             | 759  |
| Pt179307_gw1.I.7907.1                        | -----             | -----             | -----             | 371  |
| ARF21_AT1G34410                              | -----             | -----             | -----             | 594  |
| ARF20_AT1G35240                              | -----             | -----             | -----             | 578  |
| ARF22_AT1G34390                              | -----             | -----             | -----             | 586  |
| ARF12_AT1G34310                              | -----             | -----             | -----             | 585  |
| ARF15_AT1G35520                              | -----             | -----             | -----             | 590  |
| ARF14_AT1G35540                              | -----             | -----             | -----             | 593  |
| ARF13_AT1G34170                              | -----             | -----             | -----             | 500  |
| ARF4_AT5G60450                               | -----             | -----             | -----             | 780  |
| ARF3_AT2G33860                               | <b>DHHGSGRCR</b>  | <b>LFGFPLTDET</b> | <b>TAVASTAVPC</b> | 565  |
| Pt243681_gw1.XIV.424.1                       | -----             | -----             | -----             | 288  |
| Selmo1_2_61688                               | -----             | -----             | -----             | 622  |
| Selmo1_2_51695                               | -----             | -----             | -----             | 663  |
| Phypa_108888                                 | -----             | -----             | -----             | 594  |
| ARF10_AT2G28350                              | -----             | -----             | -----             | 652  |
| ARF16_AT4G30080                              | -----             | -----             | -----             | 652  |
| Phypa_61245                                  | -----             | -----             | -----             | 317  |
| ZmGRMZM2G005284_P01                          | -----             | -----             | -----             | 579  |
| ARF17_AT1G77850                              | -----             | -----             | -----             | 568  |
| Phypa_170581                                 | -----             | -----             | -----             | 825  |
| all_Phypa_171888                             | -----             | -----             | -----             | 896  |
| Selmo1_2_405821                              | -----             | -----             | -----             | 258  |
| Selmo1_2_431298                              | -----             | -----             | -----             | 363  |
| Selmo1_2_431277                              | -----             | -----             | -----             | 102  |
| corb_UMD_Coleochaete_c9703_c_s_1             | -----             | -----             | -----             | 112  |
| spra_Contig219_1                             | -----             | -----             | -----             | 360  |
| IAA12_AT1G04550                              | -----             | -----             | -----             | 172  |
| Consensus                                    | -----             | -----             | -----             |      |
| Conservation                                 | -----             | -----             | -----             |      |

|                                              | 2,320      | 2,340      |            |
|----------------------------------------------|------------|------------|------------|
| Phypa1_1_168019_estExt_fgenes1_pg.C_1630077  | LHESWAMVLS | LKPGVHIGS  | PKYYVWESYS |
| Phypa_218828                                 | -H-        | -          | -          |
| Phypa1_1_127416_e_gw1.65.212.1               | -H-        | -          | -          |
| Phypa1_1_50215_gw1.6.284.1                   | -          | -          | -          |
| Phypa_167026                                 | -          | -          | -          |
| Phypa1_1_136986_e_gw1.133.91.1               | -          | -          | -          |
| Phypa_188433                                 | -          | -          | -          |
| Phypa_165321                                 | -          | -          | -          |
| ARF8_AT5G37020                               | -          | -          | -          |
| Pt198791_gw1.IV.3880.1                       | -          | -          | -          |
| ARF6_AT1G30330                               | -          | -          | -          |
| Pt205407_gw1.V.808.1                         | -          | -          | -          |
| Selmo1_117217_e_gw1.55.235.1                 | -          | -          | -          |
| Selmo1_422125                                | -          | -          | -          |
| Selmo1_424114_fgenes2_pg.C_scaffold_65000063 | -          | -          | -          |
| Selmo1_446535                                | -          | -          | -          |
| Selmo1_181406_estExt_Genewise1Plus.C_650169  | -          | -          | -          |
| ARF19_AT1G19220                              | -          | -          | -          |
| ARF7_AT5G20730                               | -          | -          | -          |
| ZmGRMZM2G014864_P01                          | -          | -          | -          |
| ARF5_AT1G19850                               | -          | -          | -          |
| Selmo1_437944_estExt_fgenes2_pg.C_10526      | -          | -          | -          |
| all_Phypa_77324                              | -          | -          | -          |
| all_Phypa_159688                             | -          | -          | -          |
| all_Phypa_225990                             | -          | -          | -          |
| all_Phypa_171197                             | -          | -          | -          |
| Pt179921_gw1.I.8521.1                        | -          | -          | -          |
| Pt245007gw1.XIV.1750.1                       | -          | -          | -          |
| ARF9_AT4G23980                               | -          | -          | -          |
| ARF11_AT2G46530                              | -          | -          | -          |
| ARF18_AT3G61830                              | -          | -          | -          |
| ARF1_AT1G59750                               | -          | -          | -          |
| ZmGRMZM2G017187_P02                          | -          | -          | -          |
| ARF2_AT5G62000                               | -          | -          | -          |
| ZmGRMZM2G006042_P01                          | -          | -          | -          |
| Pt179307_gw1.I.7907.1                        | -          | -          | -          |
| ARF21_AT1G34410                              | -          | -          | -          |
| ARF20_AT1G35240                              | -          | -          | -          |
| ARF22_AT1G34390                              | -          | -          | -          |
| ARF12_AT1G34310                              | -          | -          | -          |
| ARF15_AT1G35520                              | -          | -          | -          |
| ARF14_AT1G35540                              | -          | -          | -          |
| ARF13_AT1G34170                              | -          | -          | -          |
| ARF4_AT5G60450                               | -          | -          | -          |
| ARF3_AT2G33860                               | VEGNSMKGAS | AVQSNHHHSQ | GRDLYAMRDM |
| Pt243681_gw1.XIV.424.1                       | -          | -          | -          |
| Selmo1_2_61688                               | -          | -          | -          |
| Selmo1_2_51695                               | -          | -          | -          |
| Phypa_108888                                 | -          | -          | -          |
| ARF10_AT2G28350                              | -          | -          | -          |
| ARF16_AT4G30080                              | -          | -          | -          |
| Phypa_61245                                  | -          | -          | -          |
| ZmGRMZM2G005284_P01                          | -          | -          | -          |
| ARF17_AT1G77850                              | -          | -          | -          |
| Phypa_170581                                 | -          | -          | -          |
| all_Phypa_171888                             | -          | -          | -          |
| Selmo1_2_405821                              | -          | -          | -          |
| Selmo1_2_431298                              | -          | -          | -          |
| Selmo1_2_431277                              | -          | -          | -          |
| corb_UMD_Coleochaete_c9703_c_s_1             | -          | -          | -          |
| spra_Contig219_1                             | -          | -          | -          |
| IAA12_AT1G04550                              | -          | -          | -          |
| Consensus                                    | -          | -          | -          |
| Conservation                                 | 100%       | 0%         |            |

|                                              |                                   |             |                                              |                                                         |     |
|----------------------------------------------|-----------------------------------|-------------|----------------------------------------------|---------------------------------------------------------|-----|
| Phypa1_1_168019_estExt_fgenes1_pg.C_1630077  | <b>I</b> SELVHRVVD                | LHPFWSVAER  | <b>L</b> SGTRSSDYE                           | 1050                                                    |     |
| Phypa_218828                                 | -----                             | -----       | <b>S</b> GGR                                 | 781                                                     |     |
| Phypa1_1_127416_e_gw1.65.212.1               | -----                             | -----       | <b>S</b> GPG*                                | 876                                                     |     |
| Phypa1_1_50215_gw1.6.284.1                   | -----                             | -----       | -----                                        | 758                                                     |     |
| Phypa_167026                                 | -----                             | -----       | -----                                        | 1018                                                    |     |
| Phypa1_1_136986_e_gw1.133.91.1               | -----                             | -----       | -----                                        | 373                                                     |     |
| Phypa_188433                                 | -----                             | -----       | -----                                        | 778                                                     |     |
| Phypa_165321                                 | -----                             | -----       | -----                                        | 841                                                     |     |
| ARF8_AT5G37020                               | -----                             | -----       | -----                                        | 798                                                     |     |
| Pt198791_gw1.IV.3880.1                       | -----                             | -----       | -----                                        | 784                                                     |     |
| ARF6_AT1G30330                               | -----                             | -----       | -----                                        | 886                                                     |     |
| Pt205407_gw1.V.808.1                         | -----                             | -----       | -----                                        | 368                                                     |     |
| Selmo1_117217_e_gw1.55.235.1                 | -----                             | -----       | -----                                        | 402                                                     |     |
| Selmo1_422125                                | -----                             | -----       | -----                                        | 780                                                     |     |
| Selmo1_424114_fgenes2_pg.C_scaffold_65000063 | -----                             | -----       | -----                                        | 432                                                     |     |
| Selmo1_446535                                | -----                             | -----       | -----                                        | 824                                                     |     |
| Selmo1_181406_estExt_Genewise1Plus.C_650169  | -----                             | -----       | -----                                        | 908                                                     |     |
| ARF19_AT1G19220                              | -----                             | -----       | -----                                        | 1073                                                    |     |
| ARF7_AT5G20730                               | -----                             | -----       | -----                                        | 1151                                                    |     |
| ZmGRMZM2G014864_P01                          | -----                             | -----       | -----                                        | 1029                                                    |     |
| ARF5_AT1G19850                               | -----                             | -----       | -----                                        | 881                                                     |     |
| Selmo1_437944_estExt_fgenes2_pg.C_10526      | -----                             | -----       | -----                                        | 753                                                     |     |
| all_Phypa_77324                              | -----                             | -----       | -----                                        | 1035                                                    |     |
| all_Phypa_159688                             | -----                             | -----       | -----                                        | 921                                                     |     |
| all_Phypa_225990                             | -----                             | -----       | -----                                        | 625                                                     |     |
| all_Phypa_171197                             | -----                             | -----       | -----                                        | 1112                                                    |     |
| Pt179921_gw1.I.8521.1                        | -----                             | -----       | -----                                        | 531                                                     |     |
| Pt245007gw1.XIV.1750.1                       | -----                             | -----       | -----                                        | 566                                                     |     |
| ARF9_AT4G23980                               | -----                             | -----       | -----                                        | 604                                                     |     |
| ARF11_AT2G46530                              | -----                             | -----       | -----                                        | 571                                                     |     |
| ARF18_AT3G61830                              | -----                             | -----       | -----                                        | 570                                                     |     |
| ARF1_AT1G59750                               | -----                             | -----       | -----                                        | 624                                                     |     |
| ZmGRMZM2G017187_P02                          | -----                             | -----       | -----                                        | 611                                                     |     |
| ARF2_AT5G62000                               | -----                             | -----       | -----                                        | 812                                                     |     |
| ZmGRMZM2G006042_P01                          | -----                             | -----       | -----                                        | 759                                                     |     |
| Pt179307_gw1.I.7907.1                        | -----                             | -----       | -----                                        | 371                                                     |     |
| ARF21_AT1G34410                              | -----                             | -----       | -----                                        | 594                                                     |     |
| ARF20_AT1G35240                              | -----                             | -----       | -----                                        | 578                                                     |     |
| ARF22_AT1G34390                              | -----                             | -----       | -----                                        | 586                                                     |     |
| ARF12_AT1G34310                              | -----                             | -----       | -----                                        | 585                                                     |     |
| ARF15_AT1G35520                              | -----                             | -----       | -----                                        | 590                                                     |     |
| ARF14_AT1G35540                              | -----                             | -----       | -----                                        | 593                                                     |     |
| ARF13_AT1G34170                              | -----                             | -----       | -----                                        | 500                                                     |     |
| ARF4_AT5G60450                               | -----                             | -----       | -----                                        | 780                                                     |     |
| ARF3_AT2G33860                               | <b>L</b> L <b>D</b> I <b>A</b> L* | -----       | -----                                        | 602                                                     |     |
| Pt243681_gw1.XIV.424.1                       | -----                             | -----       | -----                                        | 288                                                     |     |
| Selmo1_2_61688                               | -----                             | -----       | -----                                        | 622                                                     |     |
| Selmo1_2_51695                               | -----                             | -----       | -----                                        | 663                                                     |     |
| Phypa_108888                                 | -----                             | -----       | -----                                        | 594                                                     |     |
| ARF10_AT2G28350                              | -----                             | -----       | -----                                        | 652                                                     |     |
| ARF16_AT4G30080                              | -----                             | -----       | -----                                        | 652                                                     |     |
| Phypa_61245                                  | -----                             | -----       | -----                                        | 317                                                     |     |
| ZmGRMZM2G005284_P01                          | -----                             | -----       | -----                                        | 579                                                     |     |
| ARF17_AT1G77850                              | -----                             | -----       | -----                                        | 568                                                     |     |
| Phypa_170581                                 | -----                             | -----       | -----                                        | 825                                                     |     |
| all_Phypa_171888                             | -----                             | -----       | -----                                        | 896                                                     |     |
| Selmo1_2_405821                              | -----                             | <b>P</b> RR | <b>P</b> TGC <b>L</b> GV <b>G</b> V <b>A</b> | <b>T</b> LP <b>L</b> C <b>P</b> L <b>L</b> I <b>G</b> A | 281 |
| Selmo1_2_431298                              | -----                             | <b>P</b>    | -----                                        | -----                                                   | 364 |
| Selmo1_2_431277                              | -----                             | -----       | -----                                        | -----                                                   | 102 |
| corb_UMD_Coleochaete_c9703_c_s_1             | -----                             | -----       | -----                                        | -----                                                   | 112 |
| spra_Contig219_1                             | -----                             | -----       | -----                                        | -----                                                   | 360 |
| IAA12_AT1G04550                              | -----                             | -----       | -----                                        | -----                                                   | 172 |
| Consensus                                    | -----                             | -----       | -----                                        | -----                                                   |     |
| Conservation                                 | -----                             | -----       | -----                                        | -----                                                   |     |

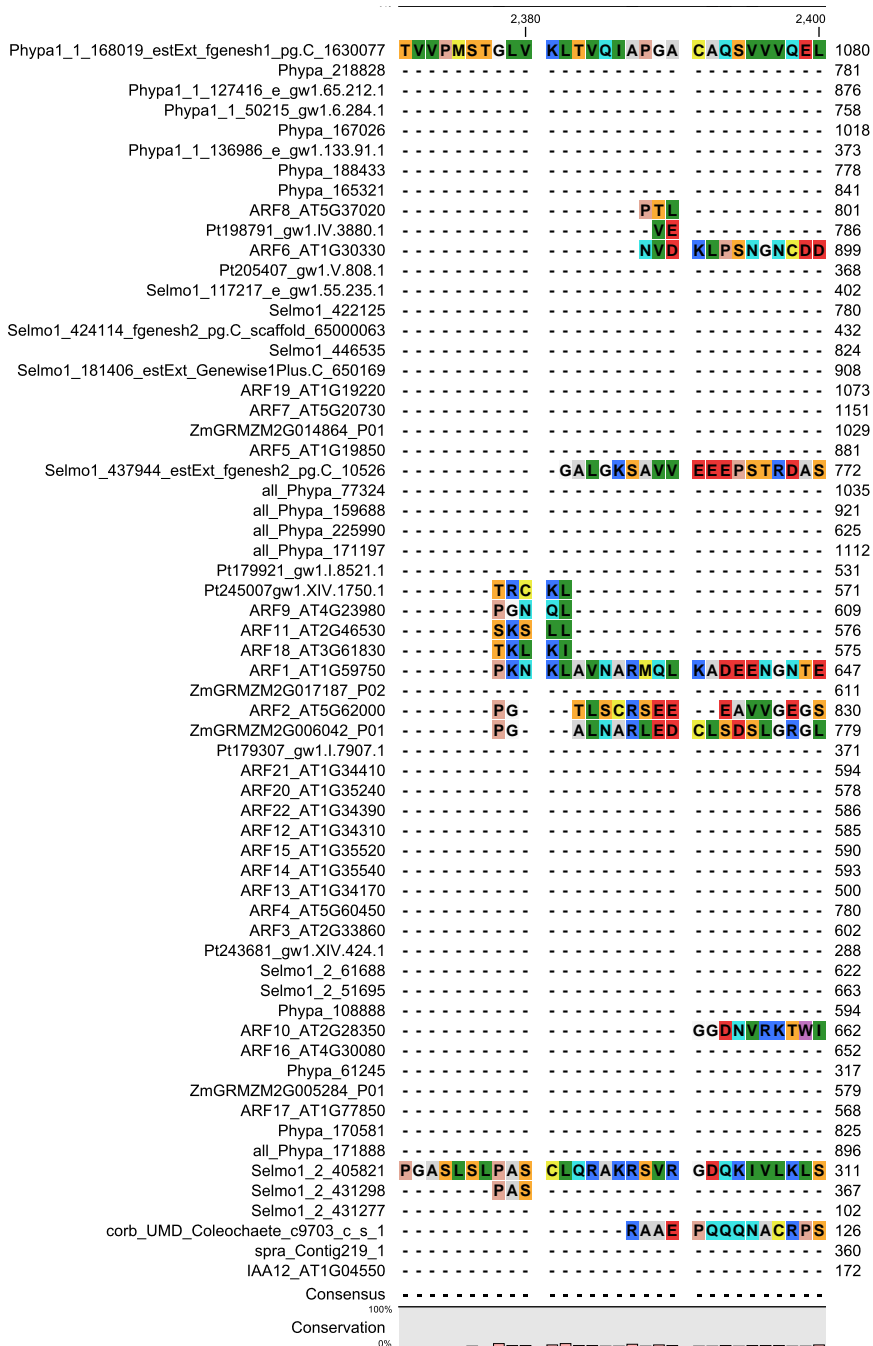

Phypha1\_1\_168019\_estExt\_fgenes1\_pg.C\_1630077 **AAPKRHTQYL** **TAGLLFQTQR** **VVV**\* 1104  
 Phypha\_218828 ----- 781  
 Phypha1\_1\_127416\_e\_gw1.65.212.1 ----- 876  
 Phypha1\_1\_50215\_gw1.6.284.1 ----- 758  
 Phypha\_167026 ----- 1018  
 Phypha1\_1\_136986\_e\_gw1.133.91.1 ----- 373  
 Phypha\_188433 ----- **GVG** **VVDH** 785  
 Phypha\_165321 ----- **GGG** **ALDH** 848  
 ARF8\_AT5G37020 ----- \* 802  
 Pt198791\_gw1.IV.3880.1 ----- **P** 787  
 ARF6\_AT1G30330 **FGNRS DPRNL** **GNGLASVGGSS** **FNY**\* 923  
 Pt205407\_gw1.V.808.1 ----- 368  
 Selmo1\_117217\_e\_gw1.55.235.1 ----- 402  
 Selmo1\_422125 ----- **RTNEEF** **TEQDANPGVE** **VEEF** 800  
 Selmo1\_424114\_fgenes2\_pg.C\_scaffold\_65000063 ----- 432  
 Selmo1\_446535 ----- 824  
 Selmo1\_181406\_estExt\_Genewise1Plus.C\_650169 ----- 908  
 ARF19\_AT1G19220 ----- \* 1074  
 ARF7\_AT5G20730 ----- \* 1152  
 ZmGRMZM2G014864\_P01 ----- **FE** 1031  
 ARF5\_AT1G19850 ----- **GINDLKT** **SVS**\* 892  
 Selmo1\_437944\_estExt\_fgenes2\_pg.C\_10526 **KLSDHQDSSS** **PPAISTKGAA** **SDL**\* 796  
 all\_Phypha\_77324 **VGKYPMTNC** **DEDDDWQSAV** **QSSG** 1058  
 all\_Phypha\_159688 **VGKLP MNNC** **DEDDDWLSAV** **QSSG** 944  
 all\_Phypha\_225990 **VGRI PASSC** **EEDDEWH** ----- 641  
 all\_Phypha\_171197 **VGKFP TSSC** **ENDLGRQ** ----- 1128  
 Pt179921\_gw1.I.8521.1 ----- 531  
 Pt245007gw1.XIV.1750.1 **PASSFEGEG** **TVVSM** **ES** **EHKS** 591  
 ARF9\_AT4G23980 **RMLLEVEET** **TLTTTSKTDN** **HSN**\* 632  
 ARF11\_AT2G46530 **GD** **KGTIV** **NLESQRQTV** **HV**\* 595  
 ARF18\_AT3G61830 **SSSLENEEY** **GNESEFNRS** **RG**\* 596  
 ARF1\_AT1G59750 **GRSS** ----- **SMA** **GSR**\* 658  
 ZmGRMZM2G017187\_P02 ----- 611  
 ARF2\_AT5G62000 **DAKDAKSASN** **PSL** **SSA** **GNS**\* 850  
 ZmGRMZM2G006042\_P01 **ASKEPRSGPS** **TSAVDSENRA** **NSSQ** 803  
 Pt179307\_gw1.I.7907.1 ----- **G** 372  
 ARF21\_AT1G34410 ----- **KS** **LSS**\* 600  
 ARF20\_AT1G35240 ----- **KS** **LSS**\* 584  
 ARF22\_AT1G34390 ----- **KL** **EVQ**\* 592  
 ARF12\_AT1G34310 ----- **R**\* 587  
 ARF15\_AT1G35520 ----- **R**\* 592  
 ARF14\_AT1G35540 ----- **KS** **LSS**\* 599  
 ARF13\_AT1G34170 ----- 500  
 ARF4\_AT5G60450 ----- 780  
 ARF3\_AT2G33860 ----- 602  
 Pt243681\_gw1.XIV.424.1 ----- 288  
 Selmo1\_2\_61688 ----- 622  
 Selmo1\_2\_51695 ----- **AD** 665  
 Phypha\_108888 ----- **P** 595  
 ARF10\_AT2G28350 **TGIRTGENG** **DASTKTGPLS** **IFA**\* 686  
 ARF16\_AT4G30080 ----- **TEQGSES** **VVV**\* 663  
 Phypha\_61245 ----- **P** 318  
 ZmGRMZM2G005284\_P01 ----- **GQ** 581  
 ARF17\_AT1G77850 ----- **NSNAGSS** **SQG**\* 579  
 Phypha\_170581 ----- 825  
 all\_Phypha\_171888 ----- 896  
 Selmo1\_2\_405821 **TFEDTRFAA** **TQKGASDTTN** **NSNK** 335  
 Selmo1\_2\_431298 ----- **SDE** 370  
 Selmo1\_2\_431277 ----- **VQNNGPRN** **SQSEGKLTDV** **DNAV** 124  
 corb\_UMD\_Coleochaete\_c9703\_c\_s\_1 **EKQNDGGNS** **LVALRASIAPI** **LDGL** 150  
 spra\_Contig219\_1 ----- **P** **LSHK** 365  
 IAA12\_AT1G04550 ----- 172

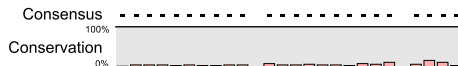

Figure S30 - alignment of IAA33 and putative ortholog

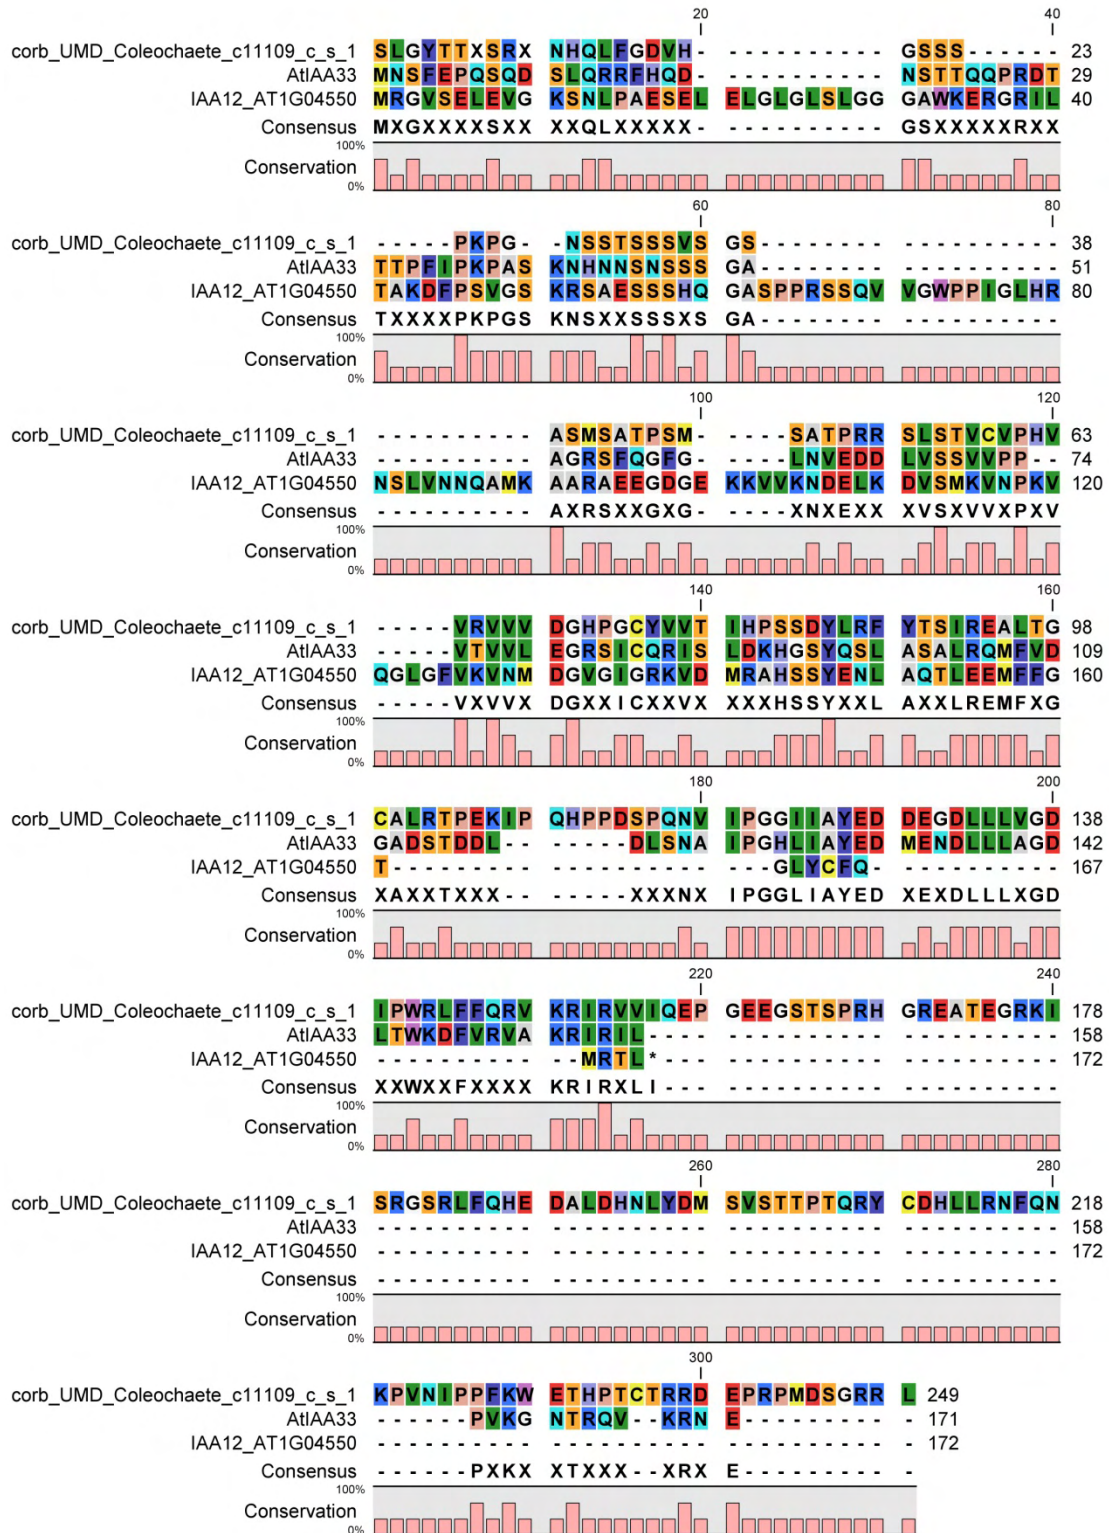

Supplement: pp.110.168161_1.pdf [file pp.110.168161_1.pdf]
