# Supplementary material
Source: PubMed Central journal article supplement (PMC3075796)
Supplement: pp.110.168161_2.pdf [file pp.110.168161_2.pdf]

## Supplementary sequences

### ABP1

>ABP1\_AT4G02980

MIVLSVGSASSSPIVVVFSVALLLFYFSETSLGAPCPINGLPVIRNISDLPQDNYGRPGL  
SHMTVAGSVLHGMKEVEIWLQTFAPGSETPIHRHSCEEVFVVLKGSGLTYLAETHGNFPG  
KPIEFPIFANSTIHIPINDAHQVKNKGHEDLQVLSRPPPIKIFIYEDWFMPTAARLK  
FPYYWDEQCQESQKDEL-

>Volca1|35798|gw1.13.76.1

AFVFDPTLGLSLSGVEVFEPGHHTPLHIHKAHELFFVLAGEGVAFCCNGRQFPVRAGDCVVFPPRAVH  
GIDNTSTGSKLYCLQLMTPNESFVEHVKSG

>Phypa1\_1|151546|e\_gw1.339.27.1

MSVVRNLTELQDSYGRPGLMHMTIAGAVHHGMKEME VWMQTFAPNSGTPIHRHECEEVITLKGHGTL  
LSRSRELDAPGEPPEFQIYPNATFTIPVDSVRNTNQGEDLQVVVTSRPPMKSFYIYKWEWSTPHAEA VYEP  
REWDKEDKLSSASQCKEPEAEDDMADIAKLLGRSIEDIVVSDEIR\*

>Selmo1|133599|e\_gw1.120.72.1

SLCFVSGILVVRNLS DIPQDSYGRPGLSHMTVAGAVHHGMKELEVWLQTFAPGSGTPIHRHDCEEIFLVL  
KGGKTLFLAEPGLEYPGEVQVQFHISGNSTMTIPVNSVHQIINTSNEDLQFYVIISRPPVIRVVFYRSFLVP  
HTEAVTHFPYPWDLKTLTS\*

>Chlre3|190281|estExt\_fgenesh2\_pg.C\_180050

MRTSWLAILALALGALVAAEAKCVVKPRKAVVDIAGIKNYTGPGSSITILHVDAWDGDDAFLSAYLTMP  
PGAVFIHRHLDLDFSEHVLVTRGVGSWEYWPLDAPKPVADPIKAGSSVYMAPNVLHRIVNTSPTETLEIMI  
TAAPGRNTVQEAYEDWPDSTAAAGHPIELPWHTDCPPGQELKQEL\*

>ChlNC64A\_1|17596|gw1.3.774.1

PVKYHIDELYQSNHGRSGLAHITVAGAAHHGMRKIEMWLQTFAPGVQTPVHRHACEE VFIQRGAGTAF  
RAPDGGVQVAFQNDTLILPDMVHQVNTGQEDLQALVVIDSPPIRIFTYSDWSIADVQAQLQPPYYW  
DRAC

>ChlNC64A\_1|26559|e\_gw1.21.185.1

MRTFEVQQTAFPGAATPIHEHACNEVFLVMRGEGETAFIRDKASGASAGSHQSTFNILPGARHQLVNTGA  
EDFQALVVTDNPPFRVGA\*

>MicpuC2|54191|EuGene.0000170037

MSRELMFENDHAICWKTTITPNAPLKMHRHADRARCIVGLKGGVLLKTEEDGRVSNLVFETGKAYWLPKDP  
PNELHADVNEGEDDVVIVITELKEEADRDTAEFGAKREPFAGLKMPKGWEPPTTKRDE\*

>MicpuN2|76900|gw2.08.745.1

WTWERIQEMYKQDGGSFKGCSEFELGKRGESTVFHVRYFEVDPGGWTLEHHRHEHAVIGLRGKGEIQ  
LGPHVYPVHVGDAAAYTAPGDTHQLRNHGDEPFQFICVVAADRDRP

>OrysaABP1.1al

MVEVCLQTFPGQRTPIHRHSCEEVFVVLKGGKTLFLGSSSMKYPGQPQEIPVFQNSTFT  
IPVNDPHQVWNSDEHEDLQVIVVISRPPKVFYDDWNMPHTAAKLQFPIFWDEELIAP  
KDEL\*

>OrysaABP1.2al

METRGTPTAAGGHGAHLGAGRGALLLALVVVSAAFPLVAESSCPDNLVVDVSKMYQ  
SNYREGFSHITIAGALAHGMKEVEVWLQTFGPGQRTPIHRHSCEEVFVVLKGGKTLG  
SSSMKYPGQPQEIPVFQNSTFVVPVNDPHQVWNSDEHEDLQVLSRPPVKIFTYDDWS  
VPHTAAKLKFPYFWDEDCLPAPKDEL\*

>OrysaABP1.2.al

METRGTPTAAGGHGAHLGAGRGALLLALVVVSAAFPLVAESSCPDNLVVDVSKMYQ  
SNYREGFSHITIAGALAHGMKEVEVWLQTFGPGQRTPIHRHSCEEVFVVLKGGKTLG  
SSSMKYPGQPQEIPVFQNSTFVVPVNDPHQVVERMIVVILFTECETS\*

>Osta4|37601|1800010005

MSREFQFENEEAICWKTTVTPNLPLKMHRHADRARVIVALQGGVLLKRVDEDEDGSTRDLVFETGKAYWYEADP  
PDNLHADVNEGEDDVVIVITTEFKTDEDRNGTRNARADCGGEGGKCDERSRIGFPFKMPLGWEPPTTKRDE\*

>PoptrABP1.1al

GLPLVRNISELPQDNYGRGGLSHITLAGSAMHGLKEVEVWLQTFSPGSRTPPIHRHSCEEIFVVLKGSGL  
YLASSSHEKYPGKQPEYFVFANSTFHIPVNDVHQVWNTNEHEDLQMLVIISRPPVKVFIYEDWFMPTAA  
KLKFPYYWDEQC

>PoptrABP1.2al

VEIWLQTCSPGAVTXIHRHSCEEVSVVMKESGLCISSNSQEKYPGKREFYFFFANSTFHILVDDAYQI

WNIDEHEAMQALAITSPHHSKFIYEDWLKPRTA AKL KLLIFWDDQCLQAPPKDEL

>GLP1\_AT1G72610

MLRTIFLLSLLFALSNASVQDFCVANLKRAETPAGYPCIRPIHVKATDFVFSGLGTPGNTTNIINAAVTPAFAAQFPGLNG  
LGLSTARLDLAPKGVIPMHTHPGASEVLFVLTGSITAGFVSSANAVYVQTLKPGQVMVFPQGLLHFQINAGKSSASAV  
TFNSANPGLQILDALFANSLPTLVVGTTFDLATTVKKLGVLGGTG

>Ost9901\_3|28211|eugene.1700010004

MSREFMFENEFaicwKTTVLPNVPLKMRHRDRARTIVALQGGVVKRIDEDGSRKDLVFETGKAYWYDADP  
PDNLHADANEGAEPVVVVVTEFKTEEDRNGTRDARAECGCGVAGGACDCRSKIGPPFVIGWEPPTKKKE  
TSA\*

## AM11

>AM11\_AT1G08980

MATNNDGFAFIEKVTISPTSTSSPPSLQGLTFAIKDIFDVEGRVTFGFGNPDWLRTHSAATSTAPVVSS  
LEAGATALGITIMDEMAYSINGENAHYGTNRPIAFDRVPGGSSSGSAVAVAAARLVDFSIGTDTGGSVRV  
PASYCGIFGRFPRSHGAVSTVGLTMAQSFDTVGWFFARDTATLKRVCVLLQQHHLNPIEPSQLIADDC  
KLCSPVHLLVQPLVGSVEKSFSGGNTVVKKVNLGEYIQNVPSLKHFMSTDDVTTQEFQIPSLMALSS  
MRLLRHEFKINHGAWISSVKPEFGPGISERIEEAIRTSDEKIDHCRSVKSELITALSTLLGEKGVLVIP  
TVPGPPHQLANVALESFRSRAFSLLSIAGVSGFCQVSIPLGLHENLPVSVSLVAKYSGSDGFLSLVDS  
LAAFI-

>TOC64-III\_AT3G17970

MASQAANLVLLGLGLAGILMLTKKLLKKTVREDFGAFIDKMLLPPPQAPPKAPHPLTG  
LTFVSDVFDITGYVTGFGHPDWVRTHAASSTSPVVSTLVEGGATCVGKTVVDEFASF  
SGENKHYDPTNPAAPTRIPGGACSGAAVAVATNAVDFALGIDTVGGVVRVPAAGYCGVLGF  
KSSYGAINSTGIIPVSSSLDSVGFARDPNTLRRVGHVLLQLPFATQRNPRQIILADDC  
QLLKIPVDRLITQVVTKSAEKLFRQLLKHQNLETYFETKVPVSLKEFARTKAIANTKVSTS  
RLLANVMQLQRHEFLQNHGDWINTVKPAIDPVLSQVCENPELTNEETENLNAIRNETR  
VAIGSLLKDDGILVIPTLPAVPPKLGSKETSEDYQNRASLLSIASISGCCQVTVPLGH  
HEKCPISVDFGRHGGDRFLDVTQTMYPVSLQYSSIVTDPKSSKAITKEESAIEAKE  
GNQAFKEKLWQKAIGLYSEAIKLSNNTATYYSNRAAAYLELGGFLQAEEDCTKAITLDDK  
NVKAYLRRGTAREMLGDCKGAIEDFRYALVLEPNNKRASLSAERLRKFQ-

>AT5G07360

MARPSIATCDPSARPCLATRGSLPRSRTCAPLLFLCLLLGLTVFCADANPSDSKLLCSRL  
LPCEPSIEMVRNCKNLWKLDRKVSVPCKRITTLTRTVTLTELPDKTMEAKCLQGMFELI  
DSAFFNETKLEIAKGATEMNVPIYRANKLVATKNGGLENPSLVFNPSWNREVQRVQD  
KRFKYPSASGVKLPREDEIDAFMSVLELDELIKTRQITSKELVRIYKQLKRYNHVLEAV  
VYTEELAYKQAKEADDDLSQGTYLGPLHGIPYGLKDIAVAVPGYKTTWGSTSFKDQFLDI  
EAWVYKRLKASGAVLVAKLVTSMA YDDIWFGRTRNPWNIEEFSTGSSAGPAASTSAGM  
VPFAIGSETAGSMTYPAARCGITALRPTFGSVGRTGVMSISESLDKLGPFCRTAADCAVI  
LDAIKGKDPDDLSSREIAFEDPFSVDITKLVGYTKDADMKVVEVLGSKGVNMVPELNY  
TVESVQGILNFTMDVDMLAHFDEWQRTGQEDLYEAQDQWPVELRRARVVTAVDYIQARA  
RGKLRIVEVKSFTVDAFIGNVTDWEKVCMGNLVGLPVLVIPTGFKNITDPPTNSCRRRTT  
INAGIYAPPERDHIALALGMAYQSVTDAHRKRPPIDDLGPDDSIIPPPRALIPRRLLHI-

>TOC64-V\_AT5G09420.1

MSNTLSLIQSNASNPVWVVIGVTVAGIVILAETRRRIRALREEDFGAFLDRFELLPPF  
PPPPAAKQSLSGLTFSISDAFDVKDYITGFGCPQWKKTHEAAEKTA VVVVTTLLKNGATC  
VGKTIMDELGFGIIGENKHYGTIPNPLMPDNVPGGSSSGSAVSVGAELVDFSLGIDTTGG  
VRVPAAFCGILGFRPSQGTVSSVGVLPNSQSLQLETVGWFFASDPVLCQVGHALLNLSAVTH  
RRQRSIFADDLFELSDIPKQKSVQVVRKAIENLSGYKTPKHVNQVGYVASNVPSLAEF  
EQSGKSQNSASTLRALSSVMLAIQRHEFKTNHEEWQTKSFLGPRFNSDVVTALKSKNE  
SIKSLYRVKNEMRATIQSLLKEDGILVIPTVADPPRLNTRKNSLNEFLDRTYALS CIA  
SMSCGCCQVTIPLGEHGRPISVLLTYGGDKFLDITLTVYASLQDQAKLASNLAPVSD  
TNGNMEASEVMKEKGNAAKQKQWNAVNIFYTEAIKNGANATYYCNRAAAFLELCCFFQ  
AEQDCTKAMLIDKKNV KAYLRRGTARESLVRYKEAAADFRHALVLEPQNKTA VAEKRLR  
KHI-

>ChlNC64A\_1\_35982\_estExt\_Genewise1Plus.C\_130278

MISQRLLVRGAKAVTGDRHPLPFLSAHLAVRSSSSHPGRGGVVRGMATHAELHSQGCYIGEVHVVGAPS  
GPLTGLTAVVKDCFDVAGHRTSNGSPA WLETHPPAQRNAAAVQALLDAGATIIGTNVMDEMAYSLAGENA  
HYGTPANPAAPGRIPGGSSSGTAAVAAGDADLGLGGDTGGSVRVPACHCGILGIRPTHGRVSLQGA VPL  
APSFDTGGWFARDAGVLRVAVGGVLLDGGSSRRPAQLRRLVAADAFGLAEAEATTKALYDALSPKIDQVAAL  
LSKPQAEVGSSTVGLSQA WFNFRVHQAEHIVQQHGA WVTHEHPNFGPGRIRERFQMAEGVSRKQYEEAA  
QQRGAARQLAELLGGDGLMLPTAPAPAPLNTPSDQLDAFRSTLISLTCIAGLSGFPQVNVPIADVEG  
LPVGLGLIGPPGSDLEDLELLEQLLAVLR\*

>ChlNC64A\_1\_9137\_gw1.10.80.1

GPLAGLAFAAKDSYNAVYATGLGNPSWARDHPPAKTTAPARKSPRCLQALLDAGANLAGKAAMSELAYD  
FSGQNYHYGTPPNTAAPCHMPGGSSSGCAALVASGEVAFALGGDTAGSVRVPASFQGVFSCRPSHGRVSL  
EGSVPLAPSFDTAGWFARDAELLSAVGKTLLAGSAPGPAVDSWNLVTATTPARVACCLLAGACGESELCFL

PHLLAAATYQCCWPLPLPLALQSKEVNEVLGPVWSGPTKPAVSAGIAQRLKAASLVSKQAAAAARQQADA  
ITTRLDSSLGTSSVLLPTTFPAPPLGSDLEAQPDNVGRLMALTSIASLAGLPQVSMPLATLEDGLPVG  
VSIIGPRGSDEALLALAERLAAA

>Chlre3\_106270\_e\_gwH.41.66.1  
DPNNAFIDKSLTVQGAAEGLKGLTFVAVKDLFDVAGHRTGFGNPVWLDTHPPATRTAPAVQALLDAGATL  
RGKTHMDELA YSLNGENVHYGTTPRNPAAAPGRIPGGSSSGSAVAAAAGDVPLALGSDTGGSVRVPAA YCGL  
FGIRPTWGRNLEGARPLAPSFDTAGWFARDAATLRAAGSVLLDPASRAPGSPRLTRWLVARDAFGLADP  
PTEKAIYDAMSADFSKVGSQAQRSTDAPLPIGWWRNTATNTLPGFEVWREHGAWVTEHNPAPFGPGIKDRFI  
MASRITQEVDAAANVKRALIRSHLLTLLGSDGVLALPTTPGPAPLVNTPPAELDAWRTRLISLTSIAGLA  
GLPQVNLPIASVDGLPVGLGLIGPPGSDEALLELAEQL

>Chlre3\_110744\_e\_gwH.1311.2.1  
XNMTEFAFSGVGINPHFGTPVNPASADGIARIPGGSSSGAAVSVVALGLAVAAALGSDTGGSSIRIPAALCGL  
TGFKPTTRRVPLTGAFPLSYTLDTACAMARTVNDCLL VDSVIADNAL VPSAPAAAAALRLAIPRQVLLDDL  
DPVVARAFDRALGRLSAAGVQLEHTDLPDLAELPGLNAAGGFSAAEAFSIHRHTLATRRNMYDPRVALRI  
DRGAAMGAADYVDLARARIDWISRVEARLARFDVICPTVPMVAPAIEPLRADDLFLRTNALLRNTSA  
FNFLDGGISLPCHPAD

>Chlvu1\_29761\_e\_gw1.9.140.1  
MSRDSSNAFLPDGPEITGAAEGLQGLTFAAKDLYDVENYVTGFGNPWKETHEPATATAPAVQALLSAG  
ASLVGKTHMDELA YSLNGENFHYGTTPVNPACDRIPGGSSSGSVVAVANESVDIALGSDTGGSVRVPASY  
CGAWGIRPTHGRVSLLEGACTLAASYDTGGFFARNAELLRRAGDVLLDPATRSVDVQFKRWLVAKDAFDLAD  
DATSEAIRVGLIDL VFLDSYHRFSLPVACTTKTASCSEGFELACCVFRVSQGAEVWEALGEWVQSAQPQ  
LPGTKERFEMASQLTLDTEVRCSSHLMNTENLHLEQLLGEDGVLA VPSAPGPAPFLNTPQQDLDFRKRRI  
SLTCIAGLSGLPQVSLPVAKVEGCPVGLGLIGPRGSDEALLRLTEQLEPVL VRP\*

>MicpuC2\_45582\_estExt\_fgenesh1\_pm.C\_60007  
MACVARASFAAFASSSSSSSIPKTGKGGSFVDHCHGVEIKGGGASATDEGAGGVLSGLTFAVKDNLDLGAG  
HRTGCGNPDWLRTRGGTPAATHAPCVAAMLDAAGATCVGKTQMDLAWSLQGENAHYGTSPNPADPSRVPG  
GSSSGSACAVAAAHVDVALGTDTAGSVRVPASYVGVYGFPRSHGRVPVDGCVALARSDFCVGFARDAAT  
LMACGAALLPPDRPSGTIHADGFKRLIVATDAFATCDAGTREALISAIERAAKAGGDLEPAWWSDFRTLQ  
TREVWLEHGA WIEETDPSFGPGV AERFAAAEAGGGAATDAIAAANAARDAITRRLNAMLEGGGVIVLPSA  
PSPALKTGASAEATEAFRRQLRLTTAAGMAGLPQARRFRIRVSIIPAATADGAPVGLSFAIARGRDEEL  
LALTVSLERLAF\*

>MicpuN2\_68791\_gw2.03.307.1  
TDPDGLAGLTFVAVKDNLDVAGHRTGCGQPTWLDTHPEPARQHAPPVASLLAAGAACVGTQMDLAWAL  
QGENHHYGTIPINAAAPERVPVGGSSSGSAVAVAAGYADVALGTDTAGSVRVPASYCGLCGFRPTHGRVDAT  
RGCVPLAPSFVVGWFARDAATMLRCGSVLLPPWGWADTAFDLRFDGAIARDAFELCDEETRATLREAVA  
RACGPGLGEAGGTVEVDVGGGGSTPPLTEWVNVFRVIQANEVWRAHGAWVSEHQPRFGPGVVERFEGA  
GGVTDAAEAEASKTRDAIAASMESTMVDEATGKDRFLFLPTSPGPPPLASGADAQTVESFRNRQLRLTAA  
GLARLPQATVPVPRRSGPPLGLSVVGPRTDEALLRL

>MicpuN2\_52588\_est\_orfs.Chr\_12\_2459\_3203322:1  
MVLKVLILASAAISGALVFSRRGKGGGKARGWRKRDALNAFQELLRLKGNAGKPLRGIRFSIQDVFVDVQ  
GRVTSLSGPAWAATHAPATRDAPAVASLRAAGADCIGVTRMDELGCSITGCDVAVDGPINPVARDKIPGG  
SSSGAAVSVAGAPKEVDMALAVDSSGGVRSAAHCHGLYAIRTTHTGTVALD GASSTTGSALAAAGWMSRDPD  
VIAATATALIPLPKDQISVSRVMVLEDAIDLCDDIASCGVATACMLLKDAFKNGGISRLNLGKHLMLMACP  
SLREMQNKDCA TGLDVLNRCLRLIEGEEVWSQIGGWYSAEKPETGAKAKEYLLGASKIATDSLVRVIKQAR  
EEVRAAVDLLLDGVTVFLPTTPCAPPMPNAGAEATATWERKVLQTLCSLSTGTPTQTIPLTYEQAEGP  
YGLSVVAGRKQDYMCIEFARMFQAQLREAFDPVVAELTRLKDEENGKDDSDAVPSMCEELKAQGNKEF  
KAGNFNEAIVKYTEAL TALGPPPNMRPDPHRAWKS VVLSNRAMTNLKLGVYNDAEDDCTAALKLNEKNVK  
AYLRRGAARSVSGNYLEAIDDF

>Ost9901\_3\_17396\_fgenesh1\_pg.C\_Chr\_11000198  
MEKTTEADELGA FVEAAEDLSERLTTTTTTTTTTTHRPLKNV FVVKDIFDIEGRRCGFGSPAFKRTGG  
KGGTAGAKRHARCVRTLEAGASAVGMTTMDELAYAINGENAHYGTIPINRARALVPGSSSGSAVACAA  
ALRGCEFALGTD TGGSVRVPASYCGVY GIRTSHGVSVMRGVQALAPSFDTVGWFARSIDLQVRVGDVLLP  
EPDKHAPTEPSRWLLEDACA AVAAVTALHEIAPADF KRMNLTEHLLVGC PKFRSLVNGREYGLDCLRE  
MVRVLMGAEIWENL GKWYTEEKPKLGAAVKARMEAA SKLDAEVERLKEVREEVREVDRLDGGAFIL  
PTTPGKAPKRGQSDQATESWRRKCFELLCIASL CGLPQVSIPLAPNIEGPQGLSLIAGYQMDKMLIGAA  
RQIVPALVEAYPDILEAELERLNPPEAPGESEKTKGNEALKQGGKYQDAIEYYSVAIGKNPKSKIFVANRA  
MAHLKLGNYQLAEDDCTEAIKLDARYVKA YLRRAAARSVAGNYLEALMDYEEALRFEPNNSDAKREVVYRM  
KKIIGMADPGMDVGM\*

>Osta4\_12917\_fgenesh1\_pg.C\_Chr\_11.0001000182  
MDGRESGLRGMKFAVKDIFDVRGRRCGFGSPAFEA TAGETPKRNAECVDDVLNAGASAIGMTTMDLAY  
AVNGENPHYRTIPINRARNLIPGGSSSGSAVACAGALRGCDFALGTD TGGSVRIPASYCGVFGIRTSHGL  
VSMRGVQALAPSFDTVGWFARSIDLRRVGDVLLPSADEHAPT KPSAWYLLEDVSDKRSSPHQAQCAAVA  
AVALNEIDRGGKFRMRNLTEHLLVGC PKFQALVGRRECDLCLREVLRVTMGAEIWENLGPWKKEQP  
LDPAVEGRLEAAAKLSPTQVELFKEIREEVRETMDRLLDNGVVVLVPTTPGKAPERGLGEKATEEWRKCC  
FELTCIASL CGLPQVSIPLAPNVEGPQGLSLIGGYQTDRLMLMDAARDLVVELVDA YPDILEAELLRLNP  
PREPGDAEKAKGNEALKKGGKYQDAIEY YGVAIGKNPKNPVYVANRAMAHLKLGNYELCEDDCTTAIKLDR  
KYTKAYLRRATARSVGGNYLEALMDFEEALRLEPNNSDAKREVNRMKKIIGMADPGMDVGMK\*

>Osta4\_33211\_0600010058

MRTTGRDDANCFVENPRAGETTADVPGGAHGALRGMRVAVKDNVDVRGMRAGAGNPTYLETGRREPATA  
HAPCVDKVLAAGARFVGKTHMDELAWSLQGENFHYGTPNARGKIPGRIPGGSSGSASAVCCGHADVAI  
GTDITIGSVRLPASFCGVYGARPTHGRVDATGVVPLSHSFDTVGWFTKDAKTLRVMGEILLDPETRAETS  
AKIGRGRLLAACSDAFRLVDPVAVKQAMNAVLSSEGKRVFKDARGDAMPDAMGIVHLVLSDLALTDKSGER  
VLPITWESETFRVIQTREVDWAHGGWIKHEKPVFGPGRDRFRAAEIGVDAATMDHVALRERITNHL  
ALLADGTLILPAARGPAPAATDYNSEASLKKLAEARSVLALGAPASLARLPCVVIPA VEIEGEPVGLM  
LMSRRGTDEALLFAEKLAWVIGLKVP\*

>Volca1\_87871\_fgenes4\_pg.C\_scaffold\_700027\_AMI1

MRSTQLYASGSDPSDPYNAYIDKSLTVKGPADGPKGLAFVAKDLFDALLDAGATLRGKTHMDELAYSLN  
GENIHYGTPINPAAPGRIPGGSSGSASWSWRACIWIYGVKTDLKGVAVAAGDVPVALGSDTGGSVRP  
AAYCGLYGRPTWARTSLAGARPLAPSFDTAGW\*

>Volca1\_116484\_fgenes5\_synt.7\_13

MPKFLAPSSKKPSPMSHVAACGDVDIGLTDGGSIRVPASFCGLLIRPTWGRVARGTALAPSFTT  
PGWFARDAVLRVAVGAVLLDPSSRGSSRLGRWLVAKDAFALADPPTGKAIYDTLSAQFPKVVQLGQPLE  
VEVAAPLSGEGLTGFVDWMGVFRGFVWQEHAAVWSAHNPEFGPGIKERFAMAAAVTKEQHEVGSARRR  
IRSHLLELLGSDGLLVPTTPGPAPPVNTPPADLDAWRTRLISLTSIAGLAGLPQVSLPIARVDGLPVG  
GLIGPPGSDEALLEITEHLMGVIAQPLQ\*

>Phypa1\_1\_197643\_estExt\_gwp\_gw1.C\_3010032

MPNDNKIARSFGLIGLAGFFVLRRLRLAVKRDNGAFIEYFELPPATSPSSAPQPLSGLTFAVKDI  
FDVEGFVTGFGNPDWAAATHEPATRTRALAVKYLVDGATCVGKLHMDelaySIIGDNKHGTPVNPAAPTR  
VPGSSSSGSGVAADLVDFSLGTDTAGSVRVPAAFCGILGFRPSHGAVPVIGVIPMAQSFDTVGCFAKD  
PTILRQVGHILLQLSYTDVRKPKQRFIADDCFELSLIPNEASVGA VIRSIQKLFGRKALQHINLGDYVAS  
AVPSLKVQKEIGSDMGAISLLRTAMQMIQRWEFKVNHEGWLTANPNLGPATAARTKAALETSSHLLPL  
LQRIKDEARYAINDLLKDDMLLVLPVDPDIPPKLNTKPESELEEFNRAMDLICIAMSGCCQVTPAGEH  
DDVPMASVLLARQGSDFRLLDTRLALYATVQVEDKADANQRASLSNGHFDAAELAKEKGNAAFKRNDFKN  
AISHYTDAIRIRGNPTYYNNRAMAYLQLRSYSEAEADCTKALILDKNVSKAYLRRTARESMGYNEAD  
EGHKRLPPATALPCAIFRQALVYEPSNKTASEALSRLKLLYN\*

>Phypa1\_1\_140463\_e\_gw1.167.37.1\_TOCs

MGRFDVESAITGFGSQDWEQTHAPATQTAVAIGRILQSGAACTGKQTMDEFGLSMFGRNKRDRGIAENPV  
PKYFAGGAASGSGVAVASNTCDFALALDTIGGVRNPASFCGIFGYRASHEAISTVGVTPVSPSLDAVGL  
SRDVHVLHQVYVKLLQPPDLERGLPSSVLVADDFSSQSSISTVRTADLIARAVSETLGRSLVHHVNLGAL  
IASSVPTLRNLFMEERLLKQDTSRYTTDFGLRDAMLILRYKFRDKHRKWFKDVDPLESSDVDVRVKFA  
MAPYIDGLHKMALKIKEETRAAMNEILLMDSLLVMPSTPSLPPLKEAKGKELEIFESRALSMLSASMSG  
CCQVTVPLGSARGIPISVSVLARHGGDMFLLESLMELNARIQMEVDVRNLQV\*

>Phypa1\_1\_142465\_e\_gw1.192.61.1\_TOC

FDVEKKITGFGSPDWENSHEPAIKTAPVLVKLRKAGATCIGKTIMDEMFGCLGANRWLGTPEPFPSTSR  
ICGSSSAAVSVGSKVDFDAIGDITVGDVVRVPAACCGVLGFRSSHGAISEGTIPVASSFDVAVGWFARN  
AGLLRLVGRQLCPHVMDGKGPGRFYMAHDVFKLSAVSHLRTADVLRARSVQRTVGRHTLCNLNFIEYLED  
HAPAIQTFFKELERMLDSSQYALDVLRESMLLFQRHEFKGNHGEWIAKAKPYLTRTRVESRVHKA VLLP  
DSEALRVIAIQVREEISSLMNLLKA\*

>Phypa1\_1\_133073\_e\_gw1.100.1.1\_TOCs

MNSYDVESVVTGFGSYDWEQTHAPATQTAVAIDSVIKAGAVSTGKQTMDDFGLSMFGRNWRDGPANPVA  
PKHFSGGAASGSGVAVASNAVDFAIDAISIGGVRIPAAFCGIFGYRASHGVISTAGVTAVAPSLDVGVF  
SRDPYVHLHQVVKLLKQPELEWGSAPVLIADDFGLSTISSVRTADLLARA VSDTIGRSLIHHVNLGTH  
IASNVPTLRNLFMEERLLKQDTSRYSTYDGLRDAMILLREEFKHRKWFEDVNPELAPDVDVRVKFA  
MAPHLDGLHRLALKVKDETRAAMNELLTDTLLVIPSTPSLPSSKAAARGKELEFFESRALSILSIASMSG  
CCQVTVPIGDVGRIPISVSLMARC GGDLFLLDSLILNPKLQLEVDVVRVQHIIHNM\*

>Selmo1\_42040\_gw1.81.189.1\_TOCs

VLVIGIAGLLIFSRQRKGV RAGNGAFIQYLELNPPPAPPAPPPRAPPPLAGLTFVAVKDIFDIEGFITFG  
NPDWLKTHGPATQTAFFVQLLVRAGAACIGKTHMDELAYSINGENKHGTPINPASPVRVPGSSSSGSAV  
AVAAGLVDFALGTDGGSVRVPAAFCGIIFRPSHGISTSGVIPMAQSFDTVGFVFAKEPNVLRQVGYAL  
LQPFMEPRQPQRVIMADDFLSSAPPERTKAVVARCFERVLGKKTMSNMIDIGPYLLSKSPSLQAFCD  
TASSPLVGLSKALSLIQRVYFLATASFIACHLRFEFKTNHEAWLSGVNPDLPGLERVRAALKTTAEI  
VLAMSVKAEVALQDDVLLVLPPTPGPPPKNLTKGKALDDYREKAFALLAIAGMSGCCQVSMVPGTFDDAP  
LAFVSMARQGGDRFLDLAVLALHVMVKEDLNSALPLVNAKTNAAEAAKEKGNLAFKNKYHKA VSHYSE  
AIRLDPLNSTYYNNRAVAHLSMCSFLQVEEDCSKAIDLKKNVSKAYLRRTAREALGSYHEAHDARRCSC  
FHLLWFFLIDFRQALVLEPTNRTALDAVKRLK

## ARFs

>Co\_e9703\_c\_s\_1

MGHADDRNFDAAGAAVLGGPGLLISPVGGARGRLRAAGFVKVHKEGSIGRSLDLSKFRG  
YNELRTEINLLFGLHGDEVDNWMYVFDNDGDRLLLGDPPWDNFVVCXAQHPRAAEPQQ  
NACRPSIEKQNDGGNSLVALRASIAPLDGL-

>Sp\_Contig219\_1  
YRHLMP5AAGRSGGAGGGSPDRKRSSPSSSLASIVESSITNLRTEGCVRHPVSSVQLS  
SSSDAIADSLSPHPLPPHAGASFPKYAWPIPLSSACQTVTASFSPGGTRSMSPTNTRSEE  
SLMLALSCQSEERTDGGGQSRRDATSDRVSEKVNQSSQSMMLFGRVIESNPNTGVFKRLH  
VAVPRTDSWQDTAMSPASLVSPFSPFPFQNCYTPSNSYELNGLMEKNLILDWNAKKGGE  
GNHNWEEKERERKEKERLLVEKDKDIANLEGEINGGLNFSSAYVCKVFNESVGRSVDL  
ARCHSHDELACHLASFFRMNPRDVIDRLVFHDANSEWLLASSIPYEKMLLTAKRAMILSS  
PLSHK-

>AtARF12\_At1G34310  
MESGNVNAQPELSGIIDGSKSYVYEQLWKLCAGPLCDIPKLGEKVYFPPQGHIELVETSTREELNELQPICDLPSKLQC  
VIAIHLKVENNSDETYAEITLMPDITQVVIPTQENENQFRPLVNSFTKVLTAASDTSAHGGFFVPKKHAIECLPSLDMSQPL  
AQELLAIDLHGNQWRFNHNRYRGTQPQRHLLTTGWNAFTTSKKLVAGDVIVFVRGETGELRVGIRRARHQQGNIPSSIVSI  
D  
MRHGTVASAKHAFDNQCMFTVVYKPRSSKFIVSYDKFLDAVNKNFNVGSRFTMRLEGDDFSERRCFGTIIGVSDFSPH  
WK  
SEWRSLEVQWDEFSTFPQPKKVPWDIEHLMPAINVPRSFLKKNKRLREVNEIGSSSSHLLPPILTQGGENEQLSVASPM  
ISLRYRDATEDAMNPSKLLMSYPVQPMPKLNYNNQMVTEENITTKTGTNFRLFGVTLDTPPVIKDPIEEIGSEISKLT  
GKKFGLSQTLSRPTIEIQNKQFSSRTCTKVQMQGVITGRAVDLSVLNGYDQLILELEKLFDIKQQLQTRNQWEIFAFTDSD  
DKMLVGDDPWPEFCNMVKKIFIKRR\*

>AtARF22\_At1G34390  
MESGNVNAQPELSGIIDGSKSYMYEQLWKLCAGPLCDIPKLGEKIYFPPQGNIELVEASTREELNELKPICDLPSKLQC  
VIAIQLKVENNSDETYAEITLMPDITQVVIPTQENENQFRPLVNSFTKVLTAASDTSGGFFVPKKHAIECLPPLDMSQPLPT  
ELLATDLHGNQWRFNHNRYRGTQPQRHLLTTGWNAFTTSKKLVAGDVIVFVRGETGELRVGIRRAGHQQGNIPSSIIIES  
M  
HGVIASAKHAFDNQCMFIVVYKPRSSQFIVSYDKFLDAVNKNFNVGSRFTMRFEEDDFSEYFVTIIGVSDFSPHWKC  
S  
WRNLEVQWDEFASFSPRNKVPWEIEHLMPALNVPRPSLLKKNKRLREVNEIGSSSSHLLPPILTQGGQEIQLSVASPMNI  
LTYRDTTDEDVMNPSRLLMSYPVQPMPKLNYNNQMVTEENITTKTGTNFRLFGVSLVTPSVIKDPIEEIGSEISKLT  
KFGQSQTLSRPTIEIQNKQFSSRTCTKVQMQGVITIERAVDLSVLNGYDQLILELEELFDLKGQLQTRNQWEIFAFTDSD  
MLVGDDPWPEFCNMVKKILIFKRRGGQKLEVQ\*

>AtARF19\_At1G19220  
MKAPSNGLPSSNEGEKKPINSQWLWHACAGPLVSLPPVGSLLVYFPPQGHSEQVAASMOKQTDIFIPNPNLPSKLIJLLHS  
TLHADTETDEVYAQMQLPVNKYDREALLASDMGLKLNRPTEFFCKTLTASDTSTHGGFVPRRAAEKIFPPLDFSM  
QP  
AQEIVAKDLHDDTTWFRHIYRGQPKRHLLTTGWSVVFSTKRLFAGDSVLFVRDEKSQLMLGIRANRQTPTLSSSVISSD  
MHIGILAAAHAHANANSSPFTIFFNPRASPSEFVPLAKYNKALYAQVSLGMRFRMMFETEDCGVRRYMGTVTGISDLDP  
V  
WKGSQLWRNLQVGWDESTAGDRPSRVSWEIEPVITPFYICPPPFPRPKYPRQPGMPDDELDMENAFKRAMPWMGEDFG  
MK  
AQSSMFPLSLVQWMSMQNNPLSGSATPQLPSALSSFNLPNNFASNDPSKLLNFQSPNLSANSQFNKPNNTVNHSIQ  
M  
AQPAMVKSQQQQQQQQQHQQQQQLQQQQQLMSQQQVQQQGIYNNGTIAVANQVSCQSPNQPTGFSQSQLQQ  
SMLPT  
AKMTHQNINSMGNKGLSQMTSFAQEMQFQQQLEMHNSSQLLRNQQEQSSLHSLQQNLSQNPQQLQMQQSSKPSPSQ  
QLQ  
QLLQKLQQQQQQSIPPVSSSLQPQLSALQQTQSHQLQQLSSQNQQPLAHGNNSPASTFMQPPQIQVSPQQQGMNS  
K  
LVAAGRSHSGHTDGEAPSCSTSPSANNTGHDNVSPTNFLSRNQQGQAASVSASDSVFERASNPVQELYTKTESRISQ  
M  
NMKSAGEHFRFKSAVTDQIDVSTAGTTYCPDVVGPVQQQTFFPLPSFGFDGDCQSHHPRNNLAFPGNLEAVTSDPLYS  
QK  
FQNLVPNYGNTPRDIETELSSAAISSQSFQIPKPGCSNEVGGINDSGIMNGGGLWPNQTRMRTYTKVQKRGVGR  
IDVTRYSGYDELRLHDLARMFGIEGLEDPLTSDWKLVTYDHENDILLVGDDPWEEFVNCVQNIKILSSVEVQQMSLDG  
DL  
AIPTTNQACSETDSGNAWKVHYEDTSAASFNRR\*

>AtARF5\_At1G19850  
MMASLSCVEDKMKTSCLVNGGGTITTTTSTQSTLLEEMKLLKDQSGTRKPVINSELWHACAGPLVCLPQVGSLLVYFYSQ  
GH  
EQVAVSTRRSATTQVPNPNLPSQLMCQVHNVTLHADKDSDEIYAQMSLQPVHSERDVFPVPDFGMLRGSKHPTTEFFC  
KT  
TASDTSTHGGFVPRRAAEKLFPLDYSAQPPTQELVVRDLHENTWTFRHIYRGQPKRHLLTTGWSLFGSKRLRAGDS  
V  
FIRDEKSQLMVGRRANRQQTALPSSVLSADSMHIGVLAHAHAHANRTPFLIFYNPRACPAEFVIPLAKYRKAICGSQ  
VGMRFGMMFETEDSGKRRYMGTVTGISDLPLRWPGSKWRNLQVEWDEPGCNDKPTRVSPWDIETPESLFIPLTSLG  
K  
QLHPSYFAGETEWGSLIKRPLIRVPDSANGIMPYASFPSMASEQLMKMMMRPHNNQNVPFSMSEMQQNIVMGNGLL  
GDM  
MQQPLMMNQKSEMVPQNKLTVNPSASNTSGEQNLSQSMSAPAKPENSTLSGCSSGRVQHGLESMEQASQVTTST  
VCN  
EKVNQLLQKPGASSPVQADQCLDITHIYQPSDPINGFSFLETDELTSQVSSQSLAGSYKQPFILSSQDSSAVVLPDS

NSPLFHDVWDTQLNGLKFDQFSPLMQQDLYASQNICMSNSTTSNILDPPLSNTVLDDFCAIKDTRDFQNHPSGCLVGNNT  
T  
FAQDVQSQITSASFADSQAFSRQDFPDNSGGTGTSSSNVDFDDCSLRQNSKGSSWQKIATRVRTYTKVQKTGSVGRSI  
D  
TSFKDYEELKSAIECMFGLLEGLLTHPQSSGWKL VYVDYESDVLVGGDDPWEEFVGCVRCIRILSPTEVQQMSEEGMKLL  
N  
AGINDLKTSVS\*

>AtARF6\_At1G30330  
MRLSSAGFNPQPHEGEKRVLNSELWHACAGPLVSLPPVGSRVVYFPQGHSEQVAASTNKEVDAHIPNYPSLHPQLICQL  
H  
VTMHADVETDEVYAQMQLPLNAQEYKDPYLPALGVPSPRQPTNYFCKTLTASDTSTHGGFVPRRAAEKVFPPLDYS  
QQ  
PAQELMARDLHDNEWKFRHIFRGQPKRHLLTTGWSVFSVAKRVLVAGDSVLFVWVNDKNQLLLGIRRRANRPQTMPSVSL  
SS  
SMHLGLLAAAHAATAANSRFTIFYNPRASPSEFVIPLAKYVKA VYHTRVSVGMFRMLFETEESVRRYMGTTITGICDL  
D  
TRWANSHWRSVKVGVWDESTAGERQPRVSLWEIEPLTTFPMYSPFPLRLKRPWPPGLPSFHGLKEDDMGMSMSPLM  
WDR  
LQSLNFQGMGVNPMWMPRLDTSGLLGMQNDVYQAMAAAALQDMRGIDPAKAAAASLLQFQNSPFGSMQSPSLVQPQ  
MLQQQ  
SQQQQQLSQQQQQQQQLSQQQQQLSQQQQQQLSQQQQQQLSQQQQQQAYLGVPEHQPSQAQSQSNHLSQQQQ  
QVVD  
HNPSASSAAVVSAMSQFGSASQPNSTPLQSMTSLCHQSQSFDSTNGGNNPISPLHTLLSNFSQDESSQLLHLTRTNSAMTS  
GWPSKRPVAVDSSFQHSAGANNNTQSVLEQLGQSHTSNVPPNAVSLPPFPGGRECIEQEGSASDPHSHLLFGVNDSSSL  
MPNGMSNLSRIGIEGGDSTLPTSSNFNDFSGNLAMTTPSSCIDESGFLQSSENLGSNPQSNFTVVKVYKSGSFGSL  
ISKFSSYHELSELARMFGLGLEQLEDPVRSWVQLVFDRENDVLLGDDPWPEFVSSVWCIKILSPQEVQQMGKRGLEL  
L  
SAPSSNNVDKLPNGNCDDFGNRS DPRNLGNGIASVGGSFNY\*

>AtARF13\_At1G34170  
MENNGEMNAQPELSVDITKTYMYEKLWNICAGPLCVLPKPEKVVYFPQGHIELIENSTRDELDIRPIFDLPSKLRV  
AIDRKVDKNTDEVYAQISLMPDTEVMTHNTTMDTRRPVYFFSKILTASDVLSGGLIIPKQY AIECFPLDMSQPIST  
NLVAKDLYGQEWFSFKHVFRGTPQRHMFSTGGGWSVFATTKRLVIGDIFVLLRGENGELRFGIRRAKHQQGHIPSSVISA  
N  
MQHGVIA SVVNAFKTKCMFN VVYKPSQQFVISYDKFVDAMNNNYIVGSRFRMQFEGKDFSEKRYDGTIIGVNDMSPH  
WK  
SEWRSKLVQWDELSPFLRPNVSPWDIEHLIPSSDISQSSLKKKKHWLQLNEIGATLSNLWTCQEIGQRSMNSPISVPEF  
YPNAIEDSKFLSGLLNLHSLLAIPNENYNSDQMIQPRKEDITTEATTSCLLFGVDLTKVSKSKDSICPIESCKKSEISKL  
NQKATTSCLKIKSLTKPNL\*

>AtARF21\_At1G34410  
MESGNVNAQPKLSGIIDGSKSYMIEQLWKLKAGPLCDIPKLGENVYFPQGNIELVQASTREELNELQPICDLPSKLQC  
VIAIHLKVENNDSDEIYAEITLMPDITQVVIPTQSENFRPLVNSFTKVLTAASDTSA YGGFVSPKHAIECLPPLDMSQPL  
AQEILAILDHNQWRFRHNYRGTQQRHSLTTGWNEFITSKKLKVGDVIVFVRGETGELRVGIRRARHQGNIPSSIVSID  
MRHGVIASAKHAFDNQCFIVVYKPRSSQFIVSYDKFLDAVNNKFNVGSFRFTMRFEQDDFSERRYFGTIIIGVSDSPHWK  
SEWRSLEVQWDEFASFSPNKVSPWEIEHLVPALNVPRSSLLKNKRLREVNEFGSSSHLLPPILTQGGQEIQLSVASPM  
ISLRVYRDTTEAAMNPSRLMSYPVQPMPKLYNNQMVVQIEENITTKAGTNFRLFGVTLDTPPMIKDPKIQIGSDISKLT  
RKKFGQSQTLSPIEQSKQFSSRTCTKVQMQGVITGRAVDLSVLNGYDQLILELEKLFDLKQQLQTRNQWKIAFTDSD  
YEMLVGDDPWPEFCKMVKKILYKKEEVKNLKSLSLSS\*

>AtARF20\_At1G35240  
METGNVNAQPELSGIIDGSKSYMIEQLWKLKAGPLCDIPKLGENVYFPQGNIELVDASTREELNELQPICDLPSKLQC  
VIAIHLKVENNDSDETYAKITLMPDITQVVIPTQSENFRPLVNSFTKVLTAASDTSA YGGFFVPKHAIECLPPLPAQE  
LAKDLHGNQWRFRHSYRGTQQRHSLTTGWNEFTTSKKLKVGDVIVFVRGETGELRVGIRRARHQGNIPSSIVSIDCMR  
H  
VIASAKHALDNQCIFIVVYKPSIRSSQFIVSYDKFLDAMNNKFIVGSRFTMRFEQDDFSERRYFGTIIIGVNDSPHWKCS  
WRSLEVQWDEFASFSPNKVSPWEIEHLSALNVPRSSLLKNKRLREVNEFGQEIGQLSVASPMNTSLRYRDTTEDAM  
NP  
RLLMSYPVQPMPKLYNNQMVVQIEENITTKAVTNFRLFGVSLAIPLVKIDPIEIEIGSDISKLTGEGKKFGQSQTLSPIE  
QSKQFGSTRCTKVQMQGVITGRAVDLSVLNGYDQLILELEKLFDLKQQLQTRNQWKIAFTDSDGYEMLVGDDPWPE  
FCK  
VKKILYKKEEVKNLKSLSLSS\*

>AtARF15\_At1G35520  
METGNVNAQPELSGIIDRSKSYMIEQLWKLKAGPLCDIPKLGKVVYFPQGNIELVEASTREELNELQPICDLPSKLQC  
VIAIHLKVENNDSDETYAKITLMPDITQVVIPTQENQFRPLVNSFTKVLTAASDISANGVFSVPKHAIECLPPLD  
SQPLPAQELLAIDLHGNQWFRHSYRGTQQRHLLTTGWNEFTTSKKLKVGDVIVFVRGETGELRVGIRRARHQGNIPS  
S  
VSDCMRHGVIA SAKHAFDNQCMFIVVYKPRSSQFIVSYDKFLDAVNNKFNVGSFRFTMRFEQDDLSERRYFGTIIIGVNSF  
PHWKCSDWRSLEVQWDEFASFSPNKVSPWEIEHLMALNVPRSSFLKNKRLREVNEFGSSSHLLPPILTQGGQEIQLS  
ASPMNISLLYRETTEDAMNPSRLMSYPVQPMPKRYNNQMVVQIEENITTKAGTNFRLFGVSLATPPVIKDPKIQIGSD  
SKLTEGKKFGQSQTLSRPTKIQSKQFSSRTCTKVQMQGVITGRAVDLSVLNGYDQLILELEKLFDLKQQLQTRNQWKII  
TGSDEDEMLVGDDPWPEFCNMVKRIYQKRR\*

>AtARF14\_At1G35540  
 MESGNVVNTQPELSGIIDGSKSYMIEQLWKLCAGPLCDIPKLGKVVYFPQGHIELVEASTREELNELQPICDFPSKLCQ  
 VIAIQLKVENNSDETYAEITLMPDITQVVIPTQNNQFRPLVNSFTKVLTAASDTSVHGGFVSPKKAIECLPLDMSQPL  
 TQEILAIIDLHGNQWRFRHIYRGTAQRHLLTIGWNAFTTSKKLVEGDVIVFVRGETGELRVGIRRAGHQGNIPSSIVSIE  
 MRHGIIASAKHAFDNQCMFIVVYKPRSSQFIVSYDKFLDVVNNKFNVGSRFTMRFEGDDFSERRSFGTIIGVSDFSPHWK  
 SEWRSLLEVQWDEFASFPRPNQVSPWDIEHLTPWSNVSRSSFLKNKRSREVNEIGSSSSHLLPPTLTQGGQEIQQSMATPM  
 ISLRYRDITEDAMTPSRLLMSYYPVQPMAKLNNYNNVVTPIEENITNAVASFRLEFVSLATPSVIKDPVEQIGLEISRLTQ  
 KKFQSQILRSPTEIQSKQFSSTRCTKVQMVGVTIGRAVDLSVLNGYDQLILELEKFLDLKGGQLQARNQWEIAFTNNEE  
 KMLVGEDPWPEFCNMVKKIFYSKEEVKNLKSRSLS\*

>AtARF1\_At1G59750  
 MAASNHSSGKPGGVLSDALCRELWHACAGPLVTLPREGERVYVYFPEGHMEQLEASMHQGLEQQMPSFNLPSKILCKVI  
 NI  
 RRAEPETDEVYAQITLLPELDQSETPDAPVQEPEKCTVHSFCKTLTASDTSTHGGFVSLRRHADCLPLDMSQPPW  
 ELVATDLHNSSEWHFRHIFRGGQPRRHLLTTGWSVVFVSSKLVAGDAFIFLRGENEELRVGVRHRMRQQTNPSSVSSHS  
 M  
 IGVLATAAAHAITGTIFSVFYKPRTSRSEFIVSVNRYLEAKTQKLSVGMRFKMRFEGEEAPEKRFSGTIVGVQENKSSVW  
 DSEWRSLKVQWDEPSSVFRPERVSPWELEPLVANSTPSSQPQPQRNKPRPPGLPSPATGSPGPVTPDGVWVWSPADTPS  
 VPLFSPPAKAATFGHGGNKSFVGSIGSAFWPTNADSAESFASAFNNESTEKKQTNGNVCRFLGFELVENVNVDECFA  
 A  
 VSGAVAVDQVPVSNFEFDSGQSEPLNINQSDIPSGSGDPEKSSLRSPQESQSRQIRSCTKVHMVQGSVAVGRAIDLTRSECY  
 DLFKKLEEMFDIKGELLESTKKWQVYVYDDEDMMMVGGDPWNEFCGMVRKIFITYPEEVKLSKPKLAVNARMQ  
 LKAD  
 EENGNTTEGRSSSMAGSR\*

>AtARF17\_At1G77850  
 MSPPSATAGDINHREVDPTIWRACAGASVQIPVLHSRVYVYFPQGHVEHCPLLSTLPSSTSPVCIITSIQLLADPVTDE  
 FAHLILQPMTQQQFTPTNYSRFRGFDGVDVDDNNKVTTFKILTPSDANNGGGFVPRFCADSVPFLNFQIDPPVQKLYY  
 DIHGAVWDFRHIYRGTPRRHLLTTGWSKVFVNSKLIAGDSVVFMRKSADEMFIVRRTPISSSDGGSSYVGGDEYNGY  
 YS  
 SSVAKEDDGSPPKTFRRSGNGKLTAEAVTDAINRASQGLPFEVVFYPAAGWSEFVRAEDVESSMSMYWTPGTRVKM  
 AME  
 EDSSRITWFQGVSSSTYQETGPRWGSPPWKQLQITWDEPEILQNVKRVNPWQVEIAAHATQLHTPFPPAKRLKYPQGGG  
 F  
 SGDDGEILYPQSGLSAAAPDPSPMSFSYSTFPAGMQGARQYDFGSFNPTGFIGGNPPQLFTNNFLSPLPDLGKVESTMM  
 FGSPPSDNLSPNSNTNLSSGNDLVGNRGPLSKKVNSIQLFGKIITVEEHSSEGAESGLCEEDGSKESSDNETQLSLSH  
 PPSVPKHSNSNAGSSSQG\*

>AtARF10\_At2G28350  
 MEQEKSLDPQLWHACAGSMVQIPSLNSTVFYFAQGHTTEHAHAPPDFHAPRVPLILCRVSVKFLADAETDEVFAKITL  
 L  
 LPGNDLDLENDAVLGLTPSSDGNNGKEKPASFAKTLTQSDANNGGGFVPRYCAETIFPRLDYSAEPPVQTVIAKDIH  
 ETWKFRIYRGTPRRHLLTTGWSVTFVNQKLIAGDSIVFLRSESGDLVCGIRRAKRGGLSAGSDNYPGFSGLRDD  
 E  
 TTTTSLMMMKNRGNNDGNAAATGRVRVEAVAEVARAACGQAFEVYVYPRASTPEFCVKAADVRSAMRIRWCSG  
 MRFKM  
 FETEDSSRISWFMGTVSAVQVADPIRWPNSPWRLQVAWDEPDLLQNVKRVSPWLVELVSNMPTIHLSPFSPRKKIRIPQ  
 FEFPHGTFKPIFSPGFANNGGEMCYLSDNNDNAPAGIQGARQAQQLFGSPSPSLLSDLNLSSTYTGNNKLSHSPAMFLS  
 FNPRHHHYQARDESENNSISCLTMGNPAMVQDKKSVGSKVTHQFVLFQGPILTEQQVMNRKRFLLEEEAEAEKGL  
 VA  
 GLTWNYSLQLETGHCKVFMESESDVGRITLDLSVIGSYQELYRKLAEFMHIEERSDLLTHVVYRDANGVIKRIKDEPFSD  
 F  
 KATKRLTIKMDIGDGNVRKTTWITGIRTGENDIDASTKTGPLSIFA\*

>AtARF3\_At2G33860  
 MGGLIDLNVMETEEDTQTQTPSSASGSVSPTSSSSASVSVSSNSAGGGVCLELWHACAGPLISLPKRGSLVLYFPQGH  
 EQAPDFSAAYGLPPHVFCRILDVKLHAETTTDEVYAQVSLPESEDIERKVRREGIIDVDGGEEDYEVLRKSNTPHMFC  
 LTASDTSTHGGFVPRRAAEDCFPLDYSQPRPSQELLARDLHGLEWRFRHIYRGQPRRHLLTTGWSAFVNNKKLVSGD  
 A  
 LFLRGDDGKLRGLVRRASQIEGTAALSAQYNQNMHNHNFSEVAHAISTHSVFSISYNPKASWSNFIIPAPKFLKVVDPYF  
 IGMRFKARVESEDASERRSPGIISGISDLDPWRWPGSKWRCLLVRWDDIVANGHQQRVSPWEIEPSGISNSGSFVTTGP  
 RSRIGFSSGKPDIPVSEGIRATDFEESLRFQVVLQGGQEIFPGFINTCSDGGAGARRGRFKGTEFGDSYGFHKVLQGGQETV  
 AYSITDHRQQHGLSQRNWCGPFQNFSTRILPPSVSSSPSSVLLTNSNSPGRLEDHGGSGRCRLFGFPLTDETTAVAS  
 TAVPCVEGNSMKGASAVQSNHHHSQGRDIYAMRDMLLDIAL\*

>AtARF11\_At2G46530  
 MANVEADFRTSGSNDDELYTELWKACAGPLVEVPYGERVFYFPQGHMEQLVASTNQGVVDQEIPLVFNLPKILCRVL  
 SV  
 LKAEHETDEVYAQITLQPEEDQSEPTSLDPLVEPAKPTVDSFVKILTASDTSTHGGFVSLRKHATECLPSLDMTQPTPT  
 ELVARDLHGYEWRFKHIFRGGQPRRHLLTTGWSVTFVTSKRLVAGDAFVFLRGETGDLRVGVRRLAKQQTMPASVISSQ  
 SM  
 LGVLATASHAVTTTTIFVYKPRISQFIISVKNYMMAMKNGFSLGMRYRMRFEGEESPERIFTGTIIGSGDLSQWPAS  
 WRSLQIQWDEPSSIQRPNKVSPWEIEPFSALTPPTQQQSKSRSPISEITGSPVASSFLSSFSQSHSNPSVKLLF  
 DPATERNSNKSVFSSGLQCKITEAPVTSSCRLFGFDLTSKPASATIPHDKQLISVDSNISDSTTKCQDPNSSNSPKEKQ

TSTRSRIK VQMQGTA VGRAVDLTLRSYDELILEKELEKMFIEGELSPKDKWAIVFTDDEGDRMLVGDWPWNEFCKMAK  
KL  
IYPSDEVKMRKSLGDKGTIVNLESDQRTVHV\*

>AtARF18\_At3G61830  
MASVEGDDDFGSSSSRSYQDQLYTELWKCAGPLVEVPRAQERVFYFPQGHMEQLVASTNQGINSEEIPVFDLPPKILC  
R  
LDVTLKAEHETDEVYAQITLQPEEDQSEPTSLDPPVIGPTKQEFHFSVKILTASDTSTHGGFVLRKHATECLPSLDMTQ  
TPTQELVTRDLHGFEWRFKHIFRGQPRRHLLTTGWSTFVSSKRLVAGDAFVFLRGENGDLRVGVRRLARHQSTMPTSVI  
S  
QSMHLGVLATASHAVRTTIFVVFYKPRISQFIVGVNKYMEAIKHGFSGLGTRFRMRFEGEESPERIFTGTIVGSGDLSSQ  
PASKWRSLQVQWDEPTTVQRPDKVSPWEIEPFLATSPISPAQQPQSKCKRSRPIEPSVKTPAPPSFLYSLPQSQDSINA  
LKLFDQPSLERISGGYSSNNSFKPETPPPNTCSYRLFGLDTSNPAPIQDKQPMDCGAACKQEPITPTSMSEKQKQ  
TSRSRTKVQMQGIAVGRAVDLTLKSYDELIDELEEMFEIQGLLARDKWIVVFTDDEGDMMLAGDDPWNEFCKMAK  
KIF  
YSSDEVKMTTKLKISSLENEEYGNESFENRSRG\*

>AtARF9\_At4G23980  
MANRGEYLYDELWKLKAGPLVDVPAQERVYVFPQGHMEQLEASTQQVDLNTMKPLFVLPKILCNVMNVSLQAE  
KDTD  
VYAQITLIPVGTVEDEPMSPPPELQRPKVHVSFKVLTASDTSTHGGFVLRKHATECLPPLDMTQQTPTQELVAEDV  
GYQWKFHIFRGQPRRHLLTTGWSTFVTSKRLVAGDTFVFLRGENGELRVGVRANLQSSMPSSVISHSMLGVLA  
TA  
HATQTKTMFVYKPRTSQFIISLNKYLEAMS NFVGMRFKMRFEGEDSPERRYSGTVIGVKDCSPHWKDSKWRCLE  
VH  
DEPASISRPNKVSWEIEPFVNSENVPKSVMLKNRPRQVSEVSALDVGITASNLWSSVLTQPHEFAQSCITSQWSSPQ  
HRDANEDAKKSDWLNNSYSVSNVAKDSTLNDQMVPVEQKPKETTANYRFLGIDLMSSSLAVPEEKTAPMRPINISK  
TM  
SHSDPKSEISKVSEKQEPAEQSPKEVQSKQSSSTRSRTKVQMQGVPVGRAVDLNLKGYNELIDIEKLFDIKELRS  
NQWEIVFTDDEGDMMLVGDWPWPEFCNMVKRIFWSEKVKMTPGNQLRMLLREVETLTTTSTKTDNHSN\*

>AtARF16\_At4G30080  
MINVMNPMKGGTEKGLDPQLWHACAGGMVRMPPMNSKVFYFPQGHAEAYDCVDFGNLPIPPMVL CRVLAIKYMA  
DAESD  
VFAKLRLIPLKDDEYVDHEYGDGEDSNGFESNSEKTPSFAKTLTQSDANNGGFSVPRYCAETIFPRLDYNAEPPVQITL  
KDVHGDVWVKFRHIYRGTPRRHLLTTGWSNFVNQKLVAGDSIVFMRAENGDL CVGIRRAKRGGIGNGPEYSAGWNP  
IGS  
GYSSLLREDESNSLRNSCNSLADRKGVTAESVIEAATLAISGRPFVYVYPRASTSEFCVKALDARAAMRIPWCSGMR  
F  
MAFETEDSSRISWFMGTVSAVNVSDPIRWPNSPWRLQVAWDEPDLLQNVKRVNPWLVELVSNVHPIPLTSFSPRRK  
MR  
PQHDPYNNLINSIPVPSFNSPLIRSSPLSSVLDNVPVGLQGARHNAHQYYGLSSDLHHYYLNRPPPPPPSSLQSPS  
GLRNDITKNEKGFCLTMTGTTPCNDTKSKKSHIVLFGKILPEEQLEKSGSTDTANIEKTQISSGNSQNGVAGREFSSS  
EGSPCSKKVHDASGLETHGCKVFMESDDVGRITLDSLVLGSYEELSRKLSDMFGIKKSEMLSSVL YRDASGAIKYAGNE  
PF  
EFLKTARRLTILTEQGSSESVVV\*

>AtARF7\_At5G20730  
MKAPSSNGVSPNVEGERRNINSELWHACAGPLISLPAGSLVYVFPQGHSEQVAASMOKTDFIPSPNLPKILICMLH  
VTLNADPETDEVYAQMTLQPVNKYDRDALLASDMGLKLNRPQNEFFCKTLTASDTSTHGGFVSPRRAAEKIFPALDFS  
MQ  
PCQELVAKDIHDNTWTRHIYRGQPKRHLLTTGWSVVFSTKRLFAGDSVLFIRDGKAQLLLGIRANRQQPALSSSVISS  
SMHIGVLA AAAHANANNSPFTIFYNPRWAAPAEFVPLAKYTKAMYAVSLGMRFRMIFETEECGVRRYMGTVTGIS  
DL  
VRWKNQWRNLQIGWDESAAGDRPSRSVSWDIEPVLTPFYICPPFFRPRFSGQPGMPDDETDMESALKRAMPWLDNS  
LE  
KDPSSSTIFPGLSLVQWMNMQQQNGQLPSAAAQPGFFPSMLSPTAALHNNLGGTDDPSKLLSFQTPHGGISSNLQFNKQ  
N  
QAPMSQLPQPPTLSQQQQQLQLLHSSLNHQQQSQSQSQSQQQQLLQQQQQLSQSQHSNNNSQSQSQQQQLLQQQ  
QQQ  
QQQHQQPLQQQTQQQQLRTQPLQSHSHPPQQLQKHKLQQLQVPQNQLYNGQQAQQHQSQAQSTHHLQPQLVSGS  
MASS  
ITPPSSSLNQSFOQQQSKQLQAHHLGASTSQSSVIETSKSSNLMSAPPQETQFSRQVEQQPPGLNGQNQQTLLQ  
KAHQAAQQIFQQLLEQPHIQFLLQRLQQQQQQFLSPQSQPLPHHQLSQQLQLPTLSQGHQFPSSCTNNGLSTLQ  
P  
QMLVSRPQEKQNPVGGGVKAYSGITDGGDAPSSSTSPSTNNCQISSGFLNRSQSGPAILIPDAIDMSGNLVQDLYSK  
DMRLKQELVGQKSKASLTDHQLASASGTSYGLDGGENNRQQNFLAPTFGLDGDSDRNSLLGGANVDNGFVPDTLLS  
RGY  
SQKDLQNMLSNYGGVTNDIGTEMSTSAVRTQSFVGNVPAISNDLAVNDAGVLGGGLWPAQTQRMRTYTKVQKRG  
VGRS  
DVNRYRGYDEL RHDLARMFIEGQLEDPQTSQDWKL VYVDHENDILLVGDWPWEEFVNCVQSIKILSSAEVQMSLDG  
NFA  
VPVTNQACSGGDSGNAWRGHYDDNSATSFN\*

>AtARF8\_At5G37020



MKLSTSGLGQQGHEGKCLNSELWHACAGPLVSLPSSGSRVVYFPQGHSEQVAATTNKEVDGHIPNYPSPQLICQLH  
N  
TMHADVETDEVYAQM TLQPLTPEEQKETVPIELGIPSKQPSNYFCKTLTASDTSTHGGFSVPRRAAEKVFPPLDYTLQP  
AQELIARDLHDVEWKFRHIFRGQPKRHLLTTGWSVVFVSAKRLVAGDSVIFIRNEKNQLFLGIRHATRPTIVPSSVLSSD  
MHIGLLAAAHAASATNSCFTVFFHPRASQSEFVIQLSKYIKAVFHTRISVGMFRMLFETEESVRRYMGTTGISDLDS  
RWPNSHWRSVKVGWDESTAGERQPRVSLWEIEPLTTFPMYPSLFPLRLKRPWHAGTSSLPDGRDGLGSLTGLRGGG  
GEQ  
GLLPLNYPVGLFPWMQQRDLDSQMGTDNNQYQAMLAAGLQNIQGGDPLRQQFVQLQEPHHQYLQQSASHNSDLM  
LQQQ  
QQQASRHLMAHTQIMSENLPQONMRQEVSNQAPAGQQQLQPPDQNAYLNAFKMQNGHLQQWQQQSEMSPSPFMK  
SDFTD  
SNKFATTASPASGDGNLLNFSITGQSVLPEQLTTEGWSPKASNTFSEPLSLPQAYPGKSLALEPGNPQNPSLFGVDPDSG  
FLPSTVPRFASSSGDAEASPMSLTDSGFQNSLYSCMQDTTHELLHGAGQINSSNQTKNFVKVYKSGSVGRSLDISRFSSY  
ELREELGKMF AIEGLEDPLRSGWQLVFVDKENDILLGDDPWESFVNNVWYIKILSPEDVHQMGD HGEGSGGLFPQN  
PT  
L\*

>AtARF4\_At5G60450  
MEFDLNTIEAEVEEEEENDDVGVGVGGTRIDKGRGLGISPSSSSSSSSGSSSSSSSTGSASSIYSELWHACAGPLTCLPKK  
NVVVYFPQGHLEQDAMVSYSSPLEIPKFDLNPQIVCRVVNVQLLANKDTDEVYTTQVTLPLQEFSSMLNGEGKEVKELG  
GE  
ERNGSSSVKRTPHMFKTLTASDTSTHGGFSVPRRAAEDCFAPLDYKQQRPSQELIAKDLHGVEWKFRHIYRGQPRRHL  
L  
TGWSIFVSQKNL VSGDAVFLRDEGGELRLGIRRAARPRNGLPDSIIKNSCSNILSLVANAVSTKSMFHVFPSPRATHA  
FVIPYEKYITSIRSPVCIGTRFRMRFEMDDSPERRCAGVVTGVCDLDPYRWPNSKWRCLLVRWDESFVSDHQRVSPWE  
I  
PSVSLPHLSIQSSPRPKRPWAGLLDTPPGNPITKRGGFLDFEESVVRPSKVLQGGQENIGSASPSQGFDMNRRILDFAMQ  
HANPVLVSSRVKDRFGEFVDATGVNPAACSGVMDLDRFPRVLQGGQEICSLKSFQFAGFSPAAPNPFAYQANKSSYYPL  
A  
HGIRSTHVQPNYNAGNQSSGPPSRAINFGEETRKFDAQNEGGLPNNVTADLPFKIDMMGKQKGSSELNMNASSGCKL  
FG  
SLPVETPASKPQSSSKRICTKVHKQGSQVGRAIDL SRLNGYDDLMELELRFNMEGLLRDPEKGWRILYTDSENDMMV  
VG  
DPWHDFCNVWVKIHLTYKKEEVENANDDNKSCLEQAALMMEASKSSSVSQPDSPTITRV\*

>AtARF2\_At5G62000  
MASSEVSMKGNRGGDNFSSSGFSDPKETRNVSVAGEGQKSNSTRSAAAERALDPEAALYRELWHACAGPLVTVPQRD  
DRV  
YFPQGHIEQVEASTNQAAEQMPLYDLPSKLLCRVINVDLKAADTDEVYAQITLLPEANQDENAIEKEAPLPPPPRFQV  
SFCKTLTASDTSTHGGFSVLRRAHADECLPPLDMSRQPPTQELVAKDLHANEWFRHIFRGQPRRHLLQSGWSVVFSSK  
L  
AGDAFIFLRGENGELRVGVRAMRQGNVPSSVSSHSMHLGVLATAWHAISTGTMFTVYYKPRTPSEFIVPFDQYME  
S  
KNNYSIGMRFKMRFEAGEEAEQRFTGTIVGIEESDPTRWPKSKWRSKLVKRWDETSIPRPDRVSPWKVEPALAPPALSPV  
MPRKRPRSNIASSPDSSMLTREGTTKANMDPLPASGLSRVLQGGQEYSLRTRKHTESVECDAPENSVVWQSSADDDKV  
D  
VSGSRRYGENWMSARHEPTYTDLLSGFGTNDIDPSHGQRIPFYDHSPPSMPAKRILSDSEGKFDYLANQWQMIHSGLS  
KLHESPKVPAATDASLQGRCNV KYSEYVNLGLSTENAGGNWPIRPRALNYEYEVNAQAQAQAREQVTKQPFITQEE  
TA  
SREGNCRFLGIPLTNNMNGTDSTMSQRNNLNDAAGLTQIASPKVQDLSQSKGSKSTNDHREQGRPFQTNPNHPKDAQ  
TK  
NSSRSCTKVHKQGIALGRSVDLSKQNYEELVAELDRLFEFNGELMAPKKDWLIVYTDENDMMLVGDWPQEFCCM  
VRK  
FIYTKEEVRKMNPGLTSCRSEEEAVVGEESDAKDAKSANPSLSSAGNS\*

>Pp\_127416  
LAVERRSLNSELWHACAGPLVSLPPVGSRVVYFPQGHTEQVVAASTQKEADAHIPNYPNLP SRLVCLLDN  
VTLHADLETDEVYAQM TLIPVLPANEKEALISPDIGMRSRQPTIEYFCKTLTASDTSTHGGFSIPRRAAEK  
VFPLDYTQTPPAQELKARDLHDQEWFRHIYRGQPRRHLLTTGWSVVFVSAKRLQAGDAVLFIRDDKGGQL  
QLGIRRQNRQQTVMPSVLSSDSMHIGVLAANHAATSSRFTIFYNPRQSPSEFVIPVAKYQKAICSLQ  
VSVGMRFRMVFETEESVRRYMGTTGMDLDIRWPNHWRSLKVGWDESTAGERQRRVSLWEIEPLTT  
PFLCPPPVAFRTKRPRGRDSTSKKSSFWGDEDTGVLGGLNFRNLSMDSWMRPQQGLPTQNEYYRA  
LAAAALQEFRTPDCKHPTSRSQSPSQMQFRSQPMQSGHHGVQHVSEACGPLLQLSSSRPQSPLEVG  
MNMPQCSGYSEEDIQMASSPSASGSYPLHMLGRTHLGCETGQVGLMMRPTQNAQQSQSGPILHGGKTS  
YFFERTIPISLRINCANVLQVSSSWYPSNRDPNQHDVSARMNLQDTSPTSRSVSGSFSLSQQSEGNGQSG  
TGMPVPASSFMFRESGQEQDSVQSDRHLLFGV SIEQQPLGASNPV ASIHSQSYPKNKD VHNRFSGNMLQ  
GSYCSSTMPDISTMNGVGLDENGMCQRGAPWATMSPAPVRTFTKVHKLGSVGRSIVQKQFQNYSELRAEL  
ARLFNLDNLLDDPQRTGWQLVFVDNENDTLLVGDWPWEEFVNYVRSIKILSPNEIQMRQEILEINTVP  
MQQRPTCSNSEDARTQTSPPNTSTLSLEHGHS GPG\*

>Pp\_136986  
GERRSLNSELWHACAGPLVSLPPVGSRVVYFPQGHIEQVAASTQKDADAHIPNYPNLP SKIICLLDNVTL  
HADPETDEVYAQMILLPIQISEKEALLSPDLEVVNKQPTIEYFCKTLTASDTSTHGGFSIPRRAAEKVFP  
LDFTRVPPAQELVARDLHDQEWFRHIYRGQPRRHLLTTGWSVVFVSAKRLQAGDSVLFIRDDKGNLLGLI  
RRANRQQTVMPSVLSSDSMHFGVLAASHAAATSSRFKIFYNPRQSPSEFVIPLTKYHKALYNTQFTVG

MRFRMVFEETESSVRRYVGTITGLDLDPIRWPKSHWRSLKVGWDESTAGERQHRVSLWEIEPLTTPFL  
CPPPLALRSKRPRGMPGKGVQL\*

>Pp\_168019

MKWTPVSNDFYVKEGWTVIRGQSFVSPFSSLAQQESPASWTVWLKLISNMEMEVLLEVSALRLQVE  
RRSPSELWHACAGPLVSLPPIGSRVVYFPQGHTEQVAASTQREAETHIPNYPSLPSRLVCLLDNVTLHV  
SDRYMSLIDVVIQADLETDEVYAQM TLIPVPPANEKEALMSPDIGIRSRQPTDYFCKTLTASDTSTHGG  
FSIPRRAAEKVFPPLDYSQTPPAQELKARDLHDQEWFRHIYRGQPRRHLLTTGWSVVFSAKRLQAGDAV  
LFIRDDKQQLGIRRRQRQTVMPSVSSDSMHIGVLAANHAHAATSSRFTIFYNPRQSPSEFVIVPA  
KYQKAICNLQVSVGMFRMVFEETESSVRRYMGTTITGMGDLDPWRPNHWRSLKVGWDESTAGERQRRV  
SLWEIEPLTTPFLCPPPLTFRAKRPWGGVDEEMDSMLKASFWSGDSGSHMDALGALNLRNFGMSSWM  
RTPQQRVEPLPAQQNEYYRAFAAAAALQEIRCSADASKHAMSHAQPSLSTSQIEFRSQSPQSNQHTAQHIP  
NTAGPVLQSSSRPESPLDVGMNMAQCSGYSES DTHMTSSAYTPGSYPLHSMLGRTHLGCENGQMTYMMR  
PTQSAQQSQPESIIHGGSVREPOFSSWYPSNRDTSEHDV SARMNQLDTSPTSRSVSSCFPFQESQVNGQ  
SGLTGLPVPTSSVYRENGQEQDSVQSDRHLLFGV SIEQPLVGSNSVTSLQPHAFKSKDPQSRFSGNTV  
LQGSYYPGNDIPTMNGVGLDENGIFMRNASWSAMAPTSTRFTKVHKLGSVGRSIDVQKFNYSSELVVE  
LARLFNLEGLLDDPQRSGWQLVFDNENDTLLVGD DPWEEFVNCVRSIKILSPNEILQMSQEQLILNSV  
PMQQRPTCSNSEDARTQTSPVLACGLLLKHVIRENEIEKLLKLACPI LFCKATPLSQVLLAADSVARRS  
FGLAANLKRSLHESWAMVISLKPGVHIGSLPKYVWESYSISELVHRVVDLHPFWSVAERLSGTRSSDYE  
TVVPMSTGLVKLTVQIAPGACAQSVVVQELAAPKRHTQYLTAGLLFQTQRVVV\*

>Pp\_50215

RRSLNSELWHACAGSLVSLPPVGSRVVYFPQGHIEQVAASTQKEADVPIPNYPSLPSRLFCLLDNVSLHA  
DHETDEVYAQM TLLPIQNSEKEALLAPDSVIPNKQPSYFCKTLTASDTSTHGGFSIPRRAAEKVFPPLD  
FTKSPPAQELVARDLHDQWFRHIYRGQPRRHLLTTGWSVVFSAKRLQAGDSVLFIRDDKDHLGIR  
ANRQSVMPSSVSSDSMHFGVLAASHAAATSSRFKIFYNPRQSPSEFVIPLAKYQKALYNTQVTLGMR  
FRMAFETESNVRYMGTTITCIGDLPARWPKSDWRSLKVGWDES IAGDRQLRVSLWEIEPTPTPFLCP  
PPVALRSKRQPEDALEMLMKSMMWPHGSDPSVSLKVGGLRDLPLWMRLPQPRLGPMVSSPQSGYRALA  
AAALQEIRSVDPDTLLPQSASSQLFFGQPQSQSQPQLMQHINDIPGLLQLTTSQTQTVDLANPVGP  
SSSYRESDMHMTSPTTMSNSLALQGMRRASTSATLSFSEGNQITSLMRKSHNGLPYGTVQGASTSWFS  
NQSDSQALISSQSRVEASSGGVPESYALPQNNESSLHQGLGHQLPFGFRSNDQSDQLQADRSHLLFGM  
SIDQPLGGSSVSPQSYRKSDDTGNMMLVVYGITFFIYRTCFQVHKLGSVGRSLDVRNFSNYTELQEL  
ARRFQLDCLMEDPSSSGWQIVFDNEDDTLLGDDPWEEFAKFKVTKIKILSPSEVAQM

>Sm\_117217

MLAELGVYQSSKQCFTPGV KRGNPELWHACAGPLVSLPSVGTTRVVYFPQGHSEQVAASTQKEADADIP  
SYPNLPPLVCQLHNITLHADTETDEVYAQM TLQPMNAQEKDSFMVSDLGRQNRQPSEYFCKTLTASDT  
THGGFSIPRRAAEKVFPPLDFSQPPAQEIVARDLHDTEWFRHIYRGQPRRHLLTTGWSVVFSAKRLQ  
GDAVLFIRDEKQQLL GIRRRANRQQASMP LSLSTDSMYIGILAAAHAANSTSSRFTIFYNPRASPEFV  
IPLSKYYNAVYNNM QVSPGMFRMQFETESGIRRHRTGTIVGSGDLDPVWRPNHWRSLKVEWDEPAAGE  
KQQRISLWEIEPASTPYLVCSPTSFRSKRPWSQALGNPIASKPRDTRGF\*

>Sm\_1\_181406

MNCLLAGEKKAMNTALWLECAGPLVTLPTVGS HVVYFPQGHSEQVVAASTQKDGVEAEIPNYPSLPAHLI  
CHLHNITLHADPDTDEVYAQM TLQPVQNDKEPFLTPDLGIQPKQQLSFCCKTLTASDTSTHGGFSIPRA  
AEKVFPPLDFTKQPPAQELVAKDLHNQQWTFRHIYRGQPRRHLLTTGWSVVFSAKRLQAGDTVLFIRDEN  
NHLLGIRRRANRQQANVPSSLLSSDSMLIGVLA AAAHAHAATNSRFTIFYNPRASFSEFVVPFCRFSKATY  
HPRVTVGMFRMELETEDSSTRRYMGTTITGIGDLSVRWPNLWRTLKVGWDESTAGQRQRRVSLWEIEP  
LTAPYFPCTSSLFLRKRTRLDGMLSFCAGELDELDAIRSQVWARAEDGKMDIRALNAAGLSLEHWLRFQH  
KPEAAIATASQPDY YRAMAAQALQEFRSVDSAKQHQHQHQHQHQVTPVIHMPPQHQHQHQHQHQYRS  
QLPQQQVLQSHPPQPIFPQQQLQQQQQLH HQHQHQHQHQHQHQHQHQHQHQHQHQHQHQHQHQHQHQHQ  
QQQLQLQQQQQQQQQSYQLQVPA SLQQTVP LASRLTPGFSEDSGASFGSMPANNMSLQSLNRSNPDA  
LLQESQYSSQVAAALKQNQLPLQQQQQQIPAPGLLSQEPQLSDVQSDLRNSHLLFGVNIDSPLMLSS  
AAAAVAQGFAPADKADKDVFSMIGSPSGDMHMSGGTAVALDSDSPTS WQQQQHQHQHQHQHQVQSPM  
RTFTKVYKTVGSRSIDVTRLNKYEELRRDIARMFNLEGQLLMDSCRSSWQLVFDVYEGDVLLVGD DPW  
EEFVGCVRFIKILSPSEVQQLNRENLESIAAVPNQRQTSSSSDDCANPTNFAQDPRLSYHHRPDFC\*

>Sm\_424114

MNTEMEGGDKKAINQALWLECAGPLITLPAIGSQVVYFPQGHSEQVIASTHKEADFEVPSYPNLPQLFC  
ILHNITLHADQENDEVFAQM TLQPFSTALLKDPFLPDFGIQTKQTIVSFSKTLTASDTSTHGGFSIPR  
RAAEKVFPPLDFTKTPAQELVARDLHNNEWHFRHIYRGQPRRHLLTTGWSVVFSAKRLQAGDTVLFIRD  
EQGQHMLGIRRRANRQQTNLPTSLSSDSMLIGVLA AAAHAHAATNSRFTIFYNPRASPEFVIPLAKYQKA  
LHPPLQTVGMFRMEMETEDSSTRRYMGTTITGIGDLDPVWRPNHWRSLKVGWDESTAGQRQRRVSAWEI  
EPLTVPFLCNSSFLRSKRPRGTEELQMKAPSIWARGEEGKFSMQNMNFPGLSGMDHWLQLQKAGGS  
AALHPPRNADH\*

>Sm\_437944

MLSSSQTYGQLGTMHMRPTQRPQPNHGNTALDSEVWHACAGPLVCLPRVGD RVVYFPQGHIEQVAAST  
NQSADMMPHYNLP SQIYCRLLNLTLGADRETDEVFAQM TLVPENEQGDQSIDTEDELSPCKRKLMSFC  
KNLTSSTDTSTHGGFSVPRRAAEELPPLDYQSPPAQELVAKDLHGVEWFRHIYRGQPRRHLLTTGWSV  
FVSQKLVAGDAVLFRLGDN GELRIGVRRVRRQNSVTSSLLSSSHSMHLGVLA AAAHAHAASVTMFTIFY  
NPRASPAEFVVPYHKYVKAFTHNLSVGMRFKMRFEETESSERYMGTTITGVGDIDSDRWINSKWRCLQV  
WDEQTANERQERVSPWEIEPFIAPNVANPPTQRVKKFRPNTPANEFPTGKNNSDSAQAMHMRALQGSHA  
LGMPSEEEGLRGSSPFAVWPYNRDDLKGESWIQLRTADAPVMDMFGNIIAPAGRHMSSNVEMHQQLRH  
CLQLRDQKSCHFDASNSQVLS PRLSSFSYQQGDAADLHLSTPRPTNHGVVDRDSSWLSPLGPTQDTAQ

AYVAADTTLSMQFSKSEMTERMHIDSNPDHEPREHSCKIFGFLIEKSPPAASRNPEEARLNPSRGGEQ  
MTRCSGRAGPSAGNGSLEHERCASRPASAWSLRTCTKVHLQGAAVGRAVDLSKFSCYSELLELQQLFGL  
DNALDDPDSGWQVYVYTDNEGDMLLVGDDPWQEFECNMVNRNIRILSPA EVEKLTQGALGKSAVVEEBEESTRD  
ASKLSDHQDSSSPAISTKGAASDL\*

>Pt\_179307

EDALYKELWHACAGPLVTVPRQGELVYFYPQGHIEQVEASTNQVADDQQMPAYNLPPKILCRVVNVQLKAELDTDEV  
FAQ  
ILLPVAEQVDLVEKEDLPPPARPRVHSFCKMLTASDTSTHGGFVLRRAHADECLPPLDMSLQPPAQELVAKDLHGNE  
W  
FRHIFRGQPRRHLLQSGWSLFFVS AKKL VAGDAFIFLRGETEELRVGVRRALSQPSNVPSVMSHSMHIGILATVWHAV  
S  
GSMFTVYYKPRTPSAEFIIPIIDKYRESVKINYAIGMRFKMKFEAEAEPEQRFSGTIVIGVEEADPKKWPRSKWRCLKVRW  
D  
TSPVHRPDRVSPWKIERALAPSLDPVPGCQSKRHRSNMATSSADSSAPTCKG

>Pt\_179921

DDLYTELWKACAGPLVDVPKRGERVFYFYPQGHMEQLEASTNQELNQRVPLFNLPSKILCRVIHTQLLAEQDTDEVY AQ  
IT  
IPESDQIEPTSPDSSSEPPRPTVHSFCKVLTASDTSTHGGFVLRKHATECLPPLDMTQPTPTQELVAKDLHG YEWRFK  
IFRGQPRRHLLTTGWSTFVTSKRLVAGDSFVFLRGENGELRVGVRRVACQSSMPSSVISSQSMHLGVLATASHAVSTL  
T  
FVYVYKPRTSQFIISLNKYLEAVSNKFVVGMRFKMRFEGEDSPDRRFSGTIVGVEDFSPHWNDSKWRSLKVQWDEPAPI  
P  
PDRVSPWEIEPCVASVPTNLSQPVTQKNKRPRPPEIPALGYSTPLSSKSKNDAILDPSDKGRKSEVPTS YRLFGLDVLN  
SSSSTPIEVPALQMSICSVSKEQKPELQKSPKEIQSKQSTSTRSRTKVQMQGIAVGRAVDL TMLKGYSQLIDELEQLF  
IKGQLHPRDKWEIVYTDDEGDMMLVGGDPWPEFCNMVRRYICSSQDVKRM

>Pt\_198791

EKKCLNSELWHACAGPLVSLPTAGSRVVYFYPQGHSEQVAATTNKEVDAHIPNYPSPPLQLICQLHNVTMHADVETDEV  
YA  
MTLQPLTPQEQKETFLPMDLGMPSKQPTNYFCKTLTASDTSTHGGFVPRRAAEKVFPPLDFTQPPAQELIARDLHDV  
E  
KFRHIFRGQPKRHLLTTGWSVVFSAKRLVAGDSVLFWNEKNQLLL GIRRATRPTQVMPSSVLSSDSMHIGLLAAAAHA  
A  
TNSCFTVFYNPRASPSEFVIPLSKYVKA VFHTRISVGMFRMLFETEESVRRYMGTTGISDLDPVRWPNHWRSVKVG  
DESTAGERQPRVSLWEIEPLTTFPMYPSLFPLRLKRPWHPGSPSLLD EASNGLMWLRGGSGEPGLPSLNFQANMLPWM  
QQ  
LDPTMLGNDHNQRYQAMLAAGMQNLGSGDPLRQQFMQLQPPFYQLQSSGHNPLLQLQQQQQQAIQQSIPHNILQA  
QNQ  
STESLPRHLLQQQLNNQPGDQAHQHQH IYHDGLQIQTDQLQRQQSNLPSFSKTEYMDSSSKFSATNTPMQNMLGSLC  
S  
GSVNLLDFSRAGQSTLTEQLPQSWVPKYAHQEVNAFANSISLPRTYPEKDPSMEAEENCSSDAQNPTLFGANIDSSGLL  
TTVPRYSTSSIDADVSSMPLGDSGFQNSLYGCVQDSSELLSNAGQMDPPTPSGTFVKVYKSGSVGRSLDISRFSSYHEL  
ELAQMFGIEGKLENPHRSGWQLVFDRENDVLLLGGDPWELFVNNVWYIKILSPEDV LKLGEQGVPE

>Pt\_205407

DKKCLNSELWHACAGPLVSLPHVGSRVVYFYPQGHSEQVAASTNKEVDAHIPNYPSPPLQLICQLHNVTMHADVETDEV  
YA  
MTLQPLSQDDQKDAYLLPAELGTASKQPTNYFCKTLTASDTSTHGGFVPRRAAEKVFPPLDYSQTTPAQELIARDLHD  
N  
WKFRHIFRGQPKRHLLTTGWSVVFSAKRLVAGDSVLFWNEKNQLLL GIRRANRPTQFMPSVLSSDSMHIGLLAAAAHA  
A  
ATNSRFTFYNPRASPSEFVIPLVKYIKAVYHTRVSVGMFRMLFETEESVRRYMGTTGISDLDPVRWPNHWRSVKV  
WDESTAGERQPRVSLWEIEPLTTFPMYPSAFPMLRKPWPSGLPSFHG

>Pt\_243681

LYTELWYACAGPLVYVPRVGDVYFYPQGHLEQVA AFLNEDSKTAMPIYDLPYKILCKVVHVQLKAEAKTDEVFAHIT  
LL  
VAEGDELSSNKDGESLLHRKTRVLSFTKCLTTPSDTSTQGGFVPKRHAEESSLPLDKSQPPAQELLAKDLHGSEWRF  
R  
IYRGQPKRHLLTGGWSTFISSKR VVAGDSFIFLRGEGELRVGVRRAMKLENNLSANVTAHSMQLGILSSASHAISTGS  
FTIFFHPWTSPAEFIIPFDQYMKSAEIEYSIGTRFIMQFEGEECTEQR

>Pt\_245007

DDL YSELWKACAGPLVDVPKAGERVFYFYPQGHMEQLEASTNQELNQQIPRNLPPKILCRVVNIQLLAEQDTDEVY AQ  
T  
HPEVDQTRPTSPDPCPEPAKQTVHSFCKILTASDTSTHGGFVLRKHATECLPPLDMSQATPTQEL AARDLHG YEWRF  
K  
IFRGQPRRHLLTTGWSTFVTSKRLVAGDSFVFLRXGDNGELRVGLRRVARQQCSIPSSVISSQSMHLGVLATASHAVLT  
H  
LFVYVYKPRTNQYIIGLNKYLEAVKNGFVGMFRFKMRFEGETPERRFTGTIVGVGDISP EWSGSIWRSLKIQWDEPATI  
RPERVSPWDIEPFAAPASPNLTQQVVKSKRPRSVDIPTSEITNPAASAFWYHGPTQSREL VQRGSITEVQSSESHVWSM  
QKEIDSNLNNNGCRLFGIDLTSNSGIAAVPEKEPAYPIVDYNGTQGLVPASSEAEKAQTMDVSMSSKEQKQGGSTSTR  
T

TKKVQMVGVAVGRALDLTVLKGKDLINLEKMFETGGELSTREKWAVVFTDNEGDMMLVGDDPWPEFCMKVKKI  
FIYSS  
EVKKMSTRCKLPASSFEGEGTVVSMESEHKS

>Zm\_GRMZM2G005284\_P01  
MSPEACELTLAPRMPASQAGAGAGAEPETKGSVHPQLWYACAGPTCTVPPVGTAVYYFPQGHAEHAGAAADANLHA  
PPFV  
CRVAGVRFMAELDTDEIFVKIRLDPLRSGEPLTDVGEAQVVNDEAGQRQPTRPVISSAKTLTKSDSYSGGSLVRRTCAE  
IFPKLDKSIKRPQQLVSARDVHGVEWTFRHVYRGTPERNLLTTGWSDFVNSKKIVIGDSVFLREEDGTIHLRRAERA  
RRNAYGRQLVRGNASGTGAAADGVLRAEDVVAADVTLAAAGNPFVHYPRATAPFCVVRVATVIEALQVSWCPGL  
RFKM  
FEAKDLSRISWFMGTVAGVGPADPARWPLSPWRFLQVWDEPELVRNMNRLSPWQVELVATMPNLPHFAAPPTPTPP  
RKK  
RMPTYKEYQSQRQLFDPVFLNPLPLPHPHHPAPTHDWNCHGFVHCSSFPFDSIAPAAAAGIQGARHANFAQFLF  
S  
HLLSNLRRSLVLGGIRQYPGDHHAAPAPRIPTDDVKTGSETPRSPSHATKCRDGVKPPGIRLFGQEILTEEQMKGSHD  
KATNNTSGRSGAPEFGLEPGQ

>Zm\_GRMZM2G006042\_P01  
MVAAAAAAGGGADAGCGGGGGGKDALFVELWKACAGPLSSVPLLGEKVYFPQGHIEQVEASTNHLAEHQGTPL  
YNLP  
KIPCKLMNMEKAEPDTEVYAQLTLLPDKKQDENTSARVENEEAEEVPHVPPATSEGLRIHSFCKTLTASDTSTHG  
G  
SVLRRHADECLPPLDMSQHPNQELVAKDLHGVEWRFRHIFRGQPRRHLQSGWSVFVSAKRLVAGDAFIFLRGENGE  
LR  
GVRRALRHQTTIPSSVISSHMLGLVATAWHAVENTGSMFTVYKPRTPAEFVSRARYCESLKRNYSIGMRFRMRFE  
G  
EAAEQRFRTGIVGICVSDPSGWADSKWRSKVRWDEASSVPRPERVSPWQIEPAVSPSPVNPLPVRFKRSSVNASPSD  
STVNREVAASKVMVESQQNNLPRALHNQGRQLTGRYRSDTDVKT AQDLTMWSSGTEQQRNIAAQTKRCLEGWTQS  
RTPE  
YNQLFSAFQPLKDAHNLPRFPFNKISGTRSSWTADARYPAQQANHNMLHGTLFMPHSSGFRMIQQNNLVTPEAN  
FT  
KSAFTSLQGHVTDQCSTGWFGSIESNSHTDHASSLIRSQPLVIGNDVQKTKGTSFKLFGIPLGSPEKSEPLVSPSPVAY  
GKLQTSPTDNNEPCSEATQNIQNKVQSSSTRCKKVHKQGSALGRSIDLTKFACYDELIAELDQMFDFDQELKSPCRNW  
L  
VYTDNEGDMMLVGDDPWNEFCDMVHKIFIYTREEVERMNP GALNARLEDCLSDSLGRGLASKEPRSGPSTSAVDSEN  
RAN  
SSQ

>Zm\_GRMZM2G014864\_P01  
MTLLPVTSYGKEALQSELALKQPRPQTEFFCKTLTASDTSTHGGFVPRRAAEKIFPPLDFSMQPPAQEIARDLHDNV  
TFRHIYRGQPKRHLLTTGWSLFSVSGKRLLAGDSVIFVRDEKQQLLLGTRRANRQPTNISSSVLSSDSMHIGLAAAAHAA  
NNSPFTIFYNPRASPTEFVVPFAKYQKALYGNQISLGMFRMMFETEELGTRRYMGTITGISDLDPVRWKNSQWRNIQV  
G  
DESAAGERRNRVSIWEIEPVAAPFFICPPFFGSKRPRQLDDESSEMENLLKRAMPWLGEEICIKDPQTQNTIMPGLSLV  
WMNMNMQQNSFANSAMQSEYLRSLSNPNMQNLGVADLSRQLNLQNLQILQQNSIQFSSPKLPQQMQQLANELSKASLPL  
NQI  
VGTKPQEQTQDPNNLQRQQQSMNQLLPLSQSQTNLVQAQVLIQNQMQQKQPTSMAQNQPPAASQSLILPQQQQQQQ  
QHQ  
QKL VHQQQQILLQQQLQQQQQLQQQQQNQQQLNKMAAQMPNLAHQPLSDQQLQLQLLQKLQQQQQSLLSOPA  
VTLAQ  
PLIQEQKLIIDMQQLSNSQPLSQQTMPQQSIQVPSRATPPPTTQQVESQQKLPQKHVGFDTDSHTTIPPTSVNTI  
VVGSPMATGATHSVTDEIPSCSTSPSTANGNHIVQPVLGRNQLCSMINYEKVPQSTPMSIPSSLEAVTATPRSIKELP  
LNSNVKQSVMASKLPNAGHVAQNLTNNAPPTDYPETASSATSVWLSQADGLLHHSFPMNSFNQQQMFKAAPETDI  
QGA  
PSNNTLFGINGDQGLGFPMGADDFLSNGIDASKYQGHISTDIDGNYSKDGQOEISSMVVSQSFASDMAFNSIDSGMN  
GGFVNRTSWPPAPPLKRMRTFTKYKRGAVGRSIDISQFSGYDELKHALARMFMEGQLEERQRIGWKLVYKDHEDDI  
LL  
GDDPWEEFVNCVKIRILSPQEVQISLDGDLGNNILPNQACSSSDGGNAWRARCDQNSGNPSTGSYDQFE

>Zm\_GRMZM2G017187\_P02  
MAAAMDAPNPGAAAGPGMPSDALYQELWHACAGPLVTVPRQGERVYFPQGHMEQLEASAHHQQLDQYLPFMDLP  
PKILC  
VVNVELRAEADSDEVYAQIMLQPEADQNELTSLDAEPQEREKCTAHSFCKTLTASDTSTHGGFVLRRAHEECLPQLD  
MS  
NPPCQELVAKDLHGTEWFRHIFRGQPKRHLLTTGWSVFVSSKRLVSGDAFIFMRGENGELRVGVRRMLRQVNSMPSS  
VI  
SHSMHLGLVATASHAISTGTLFSVFYKPRTSRDFIVSNKYLEAKKQKISVGMRFKMRFEQDDAPERFRSFTIIGIGSL  
AMSKSLWADSDWRSKLVQWDEPSSILRPDRISPWEVEPLDAANPQSPQPLRAKRPRPPASPCMVSELPSGFGLWKSPIE  
SCTLSFSEFQRARELFPISPTSLSSSSNVSNKNEPSMLTSQFYWSARHTRADSCAASNTTVIEKKQEPSSGGCRLF  
INICSAEEVLEPVTAPGVGYEQTAASVELNSDKLSQPSDVNNSDALAASSERSPLESQRQVRSCTKVIMQGMVAVGRA  
V  
LTKLSGYSDLQCLEEMFDIQGELGSTLKKWRVIFTDDEDDMMLVGDDPWE

>Sm\_405821

MVRASFRGLEFLSRSLANSAMGRAAKVLRQLQAGRIHADLFSSDLLVSTGVSRYMGTI  
TGIGDIDPARWPGSKWRFPKCSWFSFWIAKPQKRGATISSSWGAPGNANDSDRECTLFGF  
WLKAKTALASTAKDDVHKDLESLARTGTSSSKQDVHQMGRALDLRKFRGYRELEELQHL  
FGIDKLNLSGEWQAVYVDNEGDMLLVGDDPWGVFTFQGLVHGDGAMHSAAEIQKLTQARN  
SSTEPPSSRLSDQQDSSSRPTGCLGVGVA TLPLCLIGAPGASLSLPASCLQRAKRSV  
RGDQKIVLKLSTFEDTRFAIATQKGASDTTNSNK-

>Sm\_431298

MTWLMRGTSRQAGDRASLQLQLSPVKGSRAPFFCMFSTSDGVGSTTLDSIFFVSKFLEN  
PTFPDFVHTFNVGPTRVRLKLGASNKSPASSQTLRWDAQQRFCASSRPAEESTRTSSR  
PTCWFPVVSIDIWELLLELAISIRLDGLALNGASQSVPGFSPGLPSRNEGLPSHRKVDM  
HQQQLRLCIQQFREKKIPPQFGNRSSFSNQHEVAQSTCRQQTKLHMFPRSNRLELPGSP  
SFGQHRQRRRQGSRVGSFRLQEVFYWPELEPAAASRTCTKVHKHGA VGRALDLPKFRGY  
RELEELQHLFGIDENLNVASRGVLHGDGAMHSAAEIQKLTVRARNSSSTEPPSSRLSDQQD  
SSSPPASDE-

>Sm\_431277

MFWNLQTLNLFYFSKVHKHNAVGRALDLSKFRGYTQLLEEPQHLFGIDENLNESEWQAMY  
VDNEGDMFLVGEVGRFAAFASLHPRKRLKIATQKGASETSKVQNNGPRNSQSEGKLTDV  
DNAV-

>Sm\_446535

MNTEMEGGDKKAINQALWLECAGPLITLPAIGSQVYVFPQGHSEQVIASSTHKEADFEVPS  
YPNLPQQLFHNLITLHADQENDEVFQAQMTLQPFSTALDKDPFLPDFGIQTKQIVS  
FSKTLTASDSTHGGFSIPRRAAEKVFPPLDFTKTPPAQELVARDLHNNWHFRHIYRGQ  
PRRHLLTTGWSVFSVAKRLQAGDVLFLRDEQGGHMLGIRANRQQTNLPTSLLSSDSML  
IGVLA AAAHAASSTNSRFTIFYNPRASPSEFVIPLAKYQKALHPPQLTVGMFRMEMETED  
SSTRRYMGTTIGDLDVVRWPNHWRSLKVGWDESTAGQKQRRVSAWIEPLTVPFLLC  
NSSFLLRSKRPRGTEELQMKAPSIWARGEEGKFSMQNMNFPGLSGMDHWLQLQKAGGS  
AAVTPPPPVIQPGYYSSILQEMRTIDATPKQLMQSPQAFQPMQFNQSIPLLLQQQQQAQ  
QMMHLPPNVPEAASMHAPYIPAALKTTPDQEVNRNSNSYPLIIEDGVSYTSMQLQGSAPA  
SLPKQHHQQQAGMLTCSLDHQTNWMPSLREGDASIPVDASLLPPSSSQALDQDNDPR  
SHVLFGVNIQDQVPPSYAPPPFSKPKDFSGAQPDIALHAAEENGVPQPSWPQVYPPPV  
RTFTKVHKGVSVGRSLDITRFKNYHELRLNTRMFGLEHDKSGWQLVFDNENDMLLLG  
DDPWDEFICVKSIRILSSSEILQMNQEHMEWLNISPLHQQQKQASSSSDDHRPCGDVPA  
ITTATPTAATTTTATTATTTAQAGNVPRAMSSYNSDPSCVSDGI-

>Sm\_422125

MEGVKRGPNPELWHACAGPLVSLPSVGTRVYVFPQGHSEQVAASTQKEADADIPSYPNLP  
PHLVQQLHNITLHADTETDEVYAQMTLQPMNAQEKDSFMVSDLGRQNRQSEYFCKTLTA  
SDTSTHGGFSIPRRAAEKVFPPLDQPPAQEIVARLDHDEWRFRHIYRGQPRRHLLT  
TGWSVFSVAKRLQAGDVLFLRDEQGGHMLGIRANRQQAASMLLLSTDSMYIGILAAA  
AHANSTSSRFTIFYNPRASPSEFVIPLSKYYNVYNNMQVSPGMRFRMQFETEESGIRRH  
TGTVGSGDLDVVRWPNHWRSLKVEWDEPAAGEKQQRISLWIEPASTPYLVCSPTSFTF  
RSKRPSWQALGPNPIAREVEAVDAGKWKSEGLEKNLSWNMYSEQLMQLHQRPDASAAGA  
NSDFFRPDDCSRVPQDATHSQTPKGLPMQIHMKGQQQHTQLLSALPQQQAHEYNCHQH  
QQQQQQQQVVQLSQSSSALHSSGPQSLKQRGDSSDIALSSYGRSYQSSMLEQQYAR  
NIGGEQEAIQKIDTHGWYVGEKDFPTEQPLQFGLDGYSGSGAVFSINDIEQGVTAGLTF  
KDAQQQEQD TLPLDSRSHLLFGVSIPECITPSSQGPKSKDGQRVLSSTASDLHLSSD  
NGTLEEPAYLQRSSSAQHMLPRTFTKVYKTGSVGRSLDLTRLNCDGLRSELARMFGLG  
QLEDPHRSGWQLVFDNENDVLLVGDDPWEEFVSCVRCIKIMSPAELSHMNQEQLNAIQA  
RTNEEFTEQDANPGVEVEEF-

>Sm\_61688

KKGLDSQLWHACAGGMVQLPPVGAKVIYFPQGHGEQAAAIPDFPRSGGTILCRVISVDL  
ADAETDEVYAKMKLQPEVAPAPLFGTRMGDDEELVSSPTVVEKPASFATLTQSDANNGG  
GFSVPRYCAETIFPRLDYSIDPPVQTVLAKDVHGEIWKFRHIYRGTPRRHLLTTGWSTFV  
NQKKLVAGDAIVFLRSASGELCVGVRSMRGGPGNGDSGISWHSSPGQSGYSELLSGNGSG  
TSGASFARNRARTSKSVLEAASLAAAGQAFEVVYPRASTAEFCVRSVVKASLEHSWY  
PGMRFKMAFETEDSSRISWFMGTISA VQPADPIR WPSSPWRIQVSWDEPDLLQGVNRVS  
PWQVELVSTLPMQLPPFSLPRKKIRPLDLQFGESQGGFMGLPMAALANNVGLQMNPWQSL  
SEEVPAQMQRARQERFYLTLSDPPHLLRLHRSPGRNELQRFFSLGSLRILTIRKSSSC  
SSNRTRVSGNVTNNTDMTHKLFNTVSTSLRLCQGESPDGVTNESHSSKWMKEHSGAD  
PDDDGVIHCKIFFEKEEVGRTLDSLFGNYEELYDRLASMFTMDKSKLSGRVYVRDLEGS  
TIYIGGEPYGNFVKSRRRLTIL

>Sm\_51695

GGEEKHLDDQLWQACAGSMVQLPTVGSKIIYFPQGHAEQAAASSPDFPRALGPAGTVPCR  
LSVKFLADKETDEVFASLRLHPESGSDNDRAAALSPSEKPAFAKTLTQSDANNGG  
FSVPRYCAETIFPRLDYSIDPPVQTVLAKDVHGEVWKFRHIYRGTPRRHLLTTGWSTFV  
HKKLVA DAIVFLRSNSGELCVGVRSMRGGGSGNADALLWHSASSRSSLRPPMDT  
GLSDGTLMGENGSSRSAGGGGGGGSFTRNRAKVTAKSVLDAATLAASGKA FEVYYP  
ASTAEFCVRAQTVRAALSHGWYAGMRFKMAFETEDSSRISWFMGTISA VQAADPILWPSS  
PWRVLQVAWDEPDLLQGVSRVSPWQVELVSTLPMQLPPFSLPRKFRQTPAPEGQSFSG  
PTTTFANGVLGQANPWHGLSDDVPAGMQGARHERLYGLTFSECQPTRIHSGLLENRYAQ

DIPVAATLGYGATDLRLGNVFPQGGSGGGEQRTLVTTLVLCNGSQNDSGVSCTESSCNKQG  
TFLFLGKKIETARVQEQNSAGSSSEATVLSWEKKDRLEGSSSDEESSQCRVFMESGDVK  
RTLDELSSFGSYDELYKQLATVFCVDMAKISGRVVYKDESEGSTIHTGGEPYANFVKSVRRL  
TILAD

>Pp\_218828

MTLIPVPPANEKEALMSPDIGIRSRQPTDYFCKTLTASDTSTHGGFSIPRRAAEKVFPPPL  
DYSQTTPPAQELKARDLHDQEWHFRHIYRGQPRRHLLTTGWSVFSVSAKRLQAGDAVLFIRD  
DKGQLQLGIRQRNRQQTVMPPSSVSSDSMHIGVLAANHAAATSSRFTIFYNPRQSPSEF  
VIPVAKYQKAICNLQVSVGMFRFRMVFEETESSVRRYMGTITGMGDLDPIRWPNSHWRSK  
VGWDESTAGERQRRVSLWEIEPLTTPFLCPOPPLTFRAKRPWGGRVDEEMDSMLKKAASF  
SGDSGSHMDALGALNLRNFGMSSWMRTPQQRVEPGLPAQQNEYRFAFAAAALQEIRCSDA  
SKHAMSHAQPSLSTSQIEFRSQSPSNQHTAQHIPNTAGPVLQLSSSRPESPLDVGMNMA  
QCSGYSES DTHMTSSAYTPGSYPLHSMLGRTHLGCENGQMTYMMRPTQSAQQSQPESIIH  
GGSVREPPQFSSSWYPSNRDTSEHDV SARMNQLDTSPTSRSVSSCFPPQESQVNGQSGLTG  
LPVPTSSFVYRENGEQDSVQSDRHLLFGVSIQPLVGSNSVTSLQPHAFKSKDPQSRF  
SGNTVLQGSYYPNGADIPTMNGVGLDENGFMRNASWSAMAPTSTRTFTKVHKLGSVGRS  
IDVQKFNYSSELVELARLFNLEGLLDDPQSRGWQLVFVDNENDTLLVGDDPWEEFVNCV  
RSIKILSPNEILQMSQEQLLEILNSVPMQQRPTCSNSEADARTQTSVNTSNLSMEHGHS  
R-

>Pp\_167026

MTTDVVKKKKKTRGRKGGRREREREERRGERWILELHVRVSKGFDISVASASYSGRFDL  
RDLWLGRVRYEGADLEESDRIVATKLQLLPAVSIAPVTLGRKRKRDGALNEALVDMLVLS  
KRRRQNPATRIFSYACVPGERRSLNSELWHACAGPLVSLPPVGSRRVYFPPQGHIEQVAAS  
TQKDADAHIPNYPSPKIKICLLDNVTLHADPETDEVYAQMILLPIQISEKEALLSPDLE  
VVNKQPTIEYFCKTLTASDTSTHGGFSIPRRAAEKVFPPDLFTRVPPAQELVARDLHDQEW  
HFRHIYRGETTTTFLVHNYAYVIPPGRIFHRYNFAIKEWGRKCFLLVLAIVNQSHPFSSRL  
CDRQPRRHLLTTGWSVFSVSAKRLQAGDSVLFIRDGKGNLLGIRANRQQTVMPPSSVLS  
DSMHFGVLAASHAAATSSRFKIFYNPRQSPSEFVIPLTKYHKALYNTQFTVGMFRFRMV  
ETEESSVRRYVGTITGLDLDPIRWPKSHWRSKLVGWDESTAGERQHRVSLWEIEPLTTP  
FLCPOPPLALRSKRPRGMPGEDDLEMLMKKSHMWPNDSPLGLQKFGGLAMNTSWMRPQ  
QNVGSMVPPSSQNEQYRALAAALQEIRTAADSSKQLLAQSPLLSQLHFRQHOSHPPQQLM  
QHINDVPGPQLQMSTCQTQTTDLGNPARSSSYRESVQLGPPATTSNSFSYQEMMGRAPS  
SNPLTSNGGHQLTSMMRTSQNGLQPCGTMQEFIQVLAIAIVVHAELVRGFSVTMILLSHV  
FLFLWKYSAECLFQLHGSTPWFNPQDSQSLLSQHTRVEAPSGGVPGSFALPQNNESAL  
QGGNVLLSAYGPPATTSNMGNGMMSGEVLDENGLFQRNTGWPPASSQRTFTKVHKLGSV  
RSLDVRIFNTY AELRKELAKMFHLDCLMEDPPTSGWQIVFVDNENDTLLGDDPWEDFLN  
CVRSIKILSPSEVTQISQDQLKMLETVPVQHLQPQLISSDSGEVYPQSSLPDPSSGL-

>Pp\_188433

MPSIFDVPSFCILKLSRRKCAKIKSLIHPVGEKRINSELWHACAGPLVSLPPVGSQVYF  
PQGHSEQVAVSTQKEADIHIPNYPNLRPHLICITLNVTLHADLETDDVYAQMVLIPTQDP  
EKETMLLPDVVVQNKQPTIEYFCKTLTASDTSTHGGFSIPRRAAEKVFPTLDYQPPAQE  
LVARDLHDQDWHFRHIYRGQPRRHLLTTGWSIFISAKRLQAGDAVLFIRDGKQLLLGIR  
RANRLQTIMPSSVLSDSMHIGILAAASHAAQTSSRFTIFYNPRQSPSEFVIPS AKYQKA  
VYSTQITVGMFRFRMMFETEESTVRRYMGTVTGIGDLDPVRWPNSHWRSKLVGWDESTAGE  
RQRRVSLWEIEPLTTPFLCPOPPLVLSKRARGIHGEDEDELEMLMKKSPMWPSLGFQDTS  
PWMGILPQRPHGVTSSLNEYNRTLAVAASQEFREPSKQVVTESMSNPQNLYRQQQLQTQ  
QHSRNPQSIAGQINDVPGPLLQLSTSASIDLGSSVSRPSSYSDSEIYVSSPSRPFSTQ  
AMMSRIPGNVPVSSADGNQFPMLMRTNQNGLPLYGSVTGNHQVSSSWLPTLQNSQAEPQ  
SASPRFHRAEASIGGGVPGLYGPIQHGEAGDAGILPNEALDENIMLQRNVGWPAVATAPP  
VRSFTKVHKLGSVGRSLDINKFSNYVELRKELAHMFHLECLMEDSQSSWKIVFVDNEND  
TLLGDEPWEEFVSCVRSIKILSPA EVAQMNQHVLAASVSGQHLRPSNSNSEADTPSSQAGV  
GVVDH-

>Pp\_165321

MYSHASMRGSGYGPAMDQGERINSELWHACAGPLVSLPPVGSQVYFPPQGHSEQVAVS  
TQKEADTHIPNYPNLRPHLVCTLDNITLHADLETDEVYAQMVLIQSDPKETMLLPDAV  
VQNKQPTIEYFCKTLTASDTSTHGGFSIPRRAAEKVFPTLDYQPPAQELVARDLHDQD  
HFRHIYRGQPRRHLLTTGWSVFSVSAKRLQAGDAVLFIRDGKQLLLGIRANRLQTMMP  
SVLSSDSMHIGILAAASHAAQTSSRFTIFYNPRQSPSEFVIPLAKYQKAVYSTQVTVGMR  
FRMVFEETESTVRRYMGTVTGIGDLDPVRWPNSHWRSKLVGWDESTAGERQRRVSLWEI  
PLTTPFLSCPOPPLASRSKRARGIHGEDEDELEMLMKKSQLWPNSCDTLGPLSFGMEQPW  
MSQQRAGNEYRTFAAATALQEFRDPSKQVVTDSMPNSQILYRQPOPQLQNQHNLMPQ  
MNDVPGPLLQLSTTQASMDLGSSVSRPSSYSDSEIHLPSSSRSFSIQGMMGRTLGNVPT  
NSGDGNQFPLMRPNQGLTGLSPGLIAGNHQVSPSWFPTLQNPQSAESQSTASPRLHRVE  
PNGGGVPGSYGFTQHGEPEVDQPSLEHLPTYGFRSNGAESDQLQTDRLHLLFGVPIDQPLG  
TSSGLPSPNFGKAKDLSGNTMLPGSFCSPATPGDSGIMPSERIDNVMPLRPGVGVPTVQP  
APPVRSFTKVHKLGSVGRSLDINKFSNY AELRKELAHMFHLECLMEDPQQSDWLIVYVDN  
ENDTLLGDPWEAFVSCVRSIKILSPVEVAQMSQEMPAAVLGGQQLRPSNSNSEADPN  
AGGGALDH-

>Pp\_170581

MDSGVPNLVATVSPLPALIFDVVALLTITESASSLLVEVVVKYVYFSDASRDDPRAPPH

ANFNGLASQSQRREGHPIDEDLKEVKETRWYGSQRADDDVTEGFQNNVHYPGISMESL  
MRMQQIQHQQQQQQSEAAVMSPVPHLNMQQRVEAAAALQDLRGNVAFQQPQLQQHMKY  
GIQQQQSISQQKQGTQKPDVCSLGDSDNYQPHSPLSLPPPPYIRTPPLHSEADVHNGSPT  
SSSSGYPNLPNLTAPPRSSQQCSAPIQLLEPESDSSYSSLMHISQSNLLAQSKAKSVQN  
GPLQTQQSLQSSLSGMSTQQLRGHSPQSGMAQQVDGVSLHSTGHDLVEISRQQAGQAV  
PNSGLQASGSHGVSTCTQGSLLQNGNVHQQNGHSGSPGLRQSGMQNGVAFQHNGHALSANG  
HIGVQNTSIQQPGGHLNPNQLPQLGGASLPQGRHSMPSLLHQQGVNSAQNGMPNGSHN  
GMVHQQA VHSAPNGLPNASYSGMMHQGGHRIQDGMHLSTGHISSMGPQNPQNSAVIHQ  
SVQGCSSGMQQQMVYPSLHRDIQQTNNWYPSIRDSTTMSETQPSVSTSRQLTKVEAV  
AYSMNSPIHSFANQLGSQRGLPTALPQVNVQVQNGYRDIMLDQDLKQEVCGSPSNMVGKVL  
PAHTDLQGRRFQGNFNFSAPSSSGDINLSSTVMNGAFDDPRLQLRAFLCPQPKITRSYI  
KVYKLG SITRAVDVNRFKDYTELRCELARMFNLDGQLDPTVGVQLVFTDNEDDLLVGD  
PWDEFVRNVRGIRLTPAEVYFYTNEEKCTAAAYNSTGGSAPKPM-

>Pp\_171888

MWVVVAEYGCGLRRFRVLERFSDQEFASVLSVGVQLELGLDLAVLPFSQFKTVCS  
LSLRGLSRSLAVQEVRSSEFRIPGIYHVLVAVFKGRGHGYQYGRRSNFFTATLTIGRKK  
SYKYGQWRKSCCYSESSKTESRYDYTVEPAHTTWVGGKRRREGFPIDEDVKGVKSSRQ  
VYGLQNAVDDSNQFQNNVHFSGLSVKLNLMRMQQQQQQLTSDAAAMAPVVTHLNMQRVE  
AAAALQDLRGNITFPQQLQPMKYGVQQQQPLPQMQQQVMKLDTSSLGDPNCQPPQSP  
LPVPPPPYIRTPPLHSEADVHNGSPTSSSSGYPNLPNMSGPPRTSQQCNAPIQLEPES  
DSSYSSLMHPSQSNILPHSKAKNVQNGLLQTQQLQSSPSGMSAQQLRGHSPQSRMAQA  
DRSSTMHPTGHGLEGEMPRPADLAVLNPLGLQAPGSLDVSTSNQGLQNGNLHNQNGHGS  
PGLPQNGMLNSVAFHHGGRSLPACGLQNGTRNGNIQQPGGQVFSRQDPARAGATILHQ  
GGLSMPSSAHLQQGLSVQVQNAAMSNVGHNGMMHQGGGLRMQDGIPIAGHMSSVGPQKRGH  
SGAIIHQPVQGFSSMQQQQTGFPPLLRDMQVMQVQVNSWYPSIRDSTTITSETQPSVST  
SRQLQHSKVEPVAVSYVNSPMYSCVTELGSQRGISTAMSQINQVQNGYRDVLPDQLRQVC  
GSSSNMMGKVLVPTDPPQGRKFLQGNFNFSATSSSGDMSNSTMINGAFDDPTLLQRAFT  
GPQPKITRSYIKVYKLG SITRAVDVNRFKDYTELRCELARMFNLDGQLDPKVGWQLVFTD  
NEDDLLVGDWPWEEFVRNVRGIRLTPAEVYFYTNEEKCTAAAYNPAGGSAPKPM-

>Pp\_77324

MEDDLQPTLVNHYALNVLRRPPDNHQWSCSGLLDPAIRQASRGRLFHWLDLGVLCQVQE  
CLLCVGVVVGVLARGCSDMNFKLVEEAY AIDIELQVKSQVGS CDGRGMKWAMLQRR  
TVNDAARDVAEAGVCWWFLEPKIAASLVIVHVVHVNQSNISEHFLWWWYGGPLSVAIDWNE  
VMYEKVVIVSTGGSSVVGVEAVSGLDRSFPLVRRICKRIMFCQWEPIRTFTALIGSSSL  
YTMREIMDIEFLMVCFADRIELPGSALKQEIMHYGGMHGMRSEFDEGATKMDELNCELW  
HACAGPLTQLPPVDSLVMYWPQGHIEQGLASSGILDITSFVLGGGIRNTDNGAADVYQAS  
KQFSNLP AHLLCRISKIELQADPQTDEVFAQMDLTPQYETELSKETKDAPSPIQQSNVRS  
FCKTLTASDSTHGGFSVPRRAAECLPLLDHNMVPPCQELVAKDLHGKDWFSRHIYRGH  
PRRHLLTTGWSVFVSQKRLVAGDTVIFLRGENGQLRVGVRRASKQQPQARSTHFSANLH  
LGVLAASHAATERLRFVSIYVNPRTSPSEFVPIYHKYLRSNEDNLLTVGSRFKMKFETEES  
TERRYSGTIVEISDVDPKWPSSAWRSMKVEWDESASERHERVSPWEIEPLVPISTLPTP  
PVGPRPKRRPPTFTVDSATLGPSQSVLDPFQSNKLARVLSHSDPRNEPSIGDDDDGD AES  
SRTSSLVVKQEPNRRNGHIWLQRSVASYGIPSPYVNRRLSSVPPFAAPLPENTTELQ  
LSVNSGSLDQAPSNEDSSVSWASYMGTGAYQFRDPSCNKILPSWL TNSKSANLTSPPVPA  
RSQLPITSLNNDPKVLHAHNLSFELWETVEQEQLNASPALEQQCKLFGFNLADKVVPTPV  
SSAPSLCEDSESGPWSSTSDHTSSTADTRVGMIVTGTYPVAVPVRSGTKVYYSKGVGR  
TIDLKCESY AALRRMLASLFGLEGQLDDVTKGWQLVYTDHENDVLLVGDDPWEEFCNCV  
RSLKVLSPQDAAGQSVGKYPMTNCEDEDDWQSAVQSSG-

>Pp\_159688

MNFKLVEEAYGKDIELQVTSQSLRGCKEACPSFVEFIFSRWFLKLQRLVFFAREWGRG  
CSEGDVYVVVVEKEVCVSTAGGSVGYVESAVHWITAASRASQQQAQVLSVRANLQVY  
RPHRIGELSESALRQERMQYGGMRGFDEGSKMDELDCELWHACAGPLTQLPPVDSHV  
YWPQGHIEQVVACTPDSAGAADVQASKQFSNLP AHLLCKISKIELQADPHTDEVFAQMD  
LTPQYETEFTKEMKDAPPTMQKNVRSFCKTLTASDSTHGGFSVPRRAEDCLPLLDHS  
MNPPCQELVAKDLHGKEWFRHIYRGHPRRHLLTTGWSVFVSQKRLVAGDTVIFLRGENG  
QLRVGVRRASKQLPQTRSTHFSNANLHLGVLAASHAATERLRFVSIYVNPRTSPSEFV  
YHKYLKTKENLLTVGSRFKMKFESDESTERRYSGTIVEVSDADPLKWPNSAWRSMKVEW  
ESASERHERVSPWEIEPFPVPISTLPTSPVGRPKRRPPTFTVDSPPQEFITSLHLSRRHS  
SIPRRANVFRTRFLYGSFIDLARLPSTRLYPNAVVTVMCRNQS KLSIGDDDDGDISS  
RTSSLAVKQEQPRTGQFIWLQRPDVSSCGMSASPYSSPRLPSMAPFAPLPADKTDLQLS  
VKSGSLDQTLNDSVSCAPYVGPNGHSTA AHHFREPCNKILPSWL TYPKSTDGTGVT  
SLPGSGRTQLPITSLNNDPKLTPAQNLSFGSWDKVEQEKVHTSPALEQQCKLFGFNLVDK  
AVLAPVSSAPSHCEDSESGPWSSTDLTSPTSVDTHVSKLANGAYQPPTVVRSGTKVNY  
YGFGRITVDLKKCDSYAALRRMLATLFGLEGQLDDVTKGWQLVYTDHENDVLLVGDDPW  
EFCNCVRSKILSPQDAAGQNVGKLP MNNCEDEDDWLSAVQSSG-

>Pp\_225990

MDEL DYELWHACAGPLTSVPPVDSLVMYWPQGHIEQVCAADVREASSHFKLPSHLLCKIG  
QLELQADPHTDEVFAQMDLLPQDEGLTKEMKDATHVAKQNNVKMFCCKTLTASDSTHGG  
FSVPRRSAEDCLPSLDY TANPPCQELVAKDLHGHEWFRHIYRGHPRRHLLTTGWSAFVS  
AKKLVAGDTVIFLRGENGQLRVGVRRASKQQPQARSTNFSSTNLHLGVLAASHASREGM  
RFSVIYVNPRTSPSEFVPIYKFLKAMDNLKAVGSRFRMKFESEESSERRFAGTITEVSDA

DPVRWPNLSLWRSMKVEWDEVISASERHERVSPWEIEPFVQISTLPPQLGPRQKRRPLTL  
VAKESPLGTIFYTGLIKDYSSAPWSDFGICPSNRTGASFPVRESPCPSINPSWLYSASTS  
RAVFERGILTNLSHESAPEMPLPPQAVPAFEVRDKAQLEKVDTPGLVQPCCKLFGFNLAD  
KIVPTLAPLPPSQGDVSEGLVDSIRTDSTPTSGGPFSGKVAEASSQVQAHAAPMRSGI  
KVYQQGKVGRTIDLKCESYDGLRRVLANLFLNLQGLDDVTGWQLVYTDHENDVLLVGD  
DPWEEFCGVRSLKILSPQDAAGQTVGRIPASSCEEDDEWH-

>Pp\_171197

MDEREIRENGSKTLKMRQGLPGRSRHKKEAATTTTTTRGTMAFSFPPYASPSSSSSASA  
SLLSGYFRASALRRRLAVWQSRLFYLSLPRFSTFSDRRSISHPGSPLSLFLTRALCVSLN  
WLCLSLASSGPTGDDNHAPESSEVEEDKEEEKKRGVLAAPWLLIELVHRLGYTHITTTW  
QGCTVPGTPGSGQTMTETAPPVAPPSRRGGGKNRVGSKGPGMGVGDGDGNVAGSAAGR  
HASRQRHQWGWVQGGGGPLSRKARFRGAQMRDADRIPFVGLLRELSSEVARKEGKDIVV  
WITLQLQAPKQASQFVWPLVMLGLRVGKSIIFAAVQFLWRWGCEAFRLASFCIPERGR  
ARVEVLKSARERLRIRSLEAGVTTASNDVWGLSKIDDLDELWHACAGPLTSLPPVDS  
LVIIYWPQGHIEQVIACPTDSAGAADVREASSHFKLPSHLLCRIGQLELQADPNTDEVFAQ  
MDLLPQDEGSVTKEKMEAPSAIKQSSVKMFCKTLTASDSTHGGFSVPRSAEDCLPLD  
YNMNPQCQLVAKDLHGQEWKFRHIYRGYPRRHLLTTGWSTFVSAKKLVAAGDTVIFLRGE  
NGQLRVGVRASKQQPAHSTYFSSTNLHLGLVAAASHASREGMRFSVIYNPRTSPSEFV  
IPYHKFLKAMDYNLAVGSRFRMKFESESSGRRYAGTITEVNDADPLRWPNLSLWRSMKVE  
WDEVISASDRHERVSPWEIEPFVPISTLPPPLGGARQKRRSPTLVKDLLGTSQSVLDSY  
QSNKLFKVLQGFDSRNEFSMEDEDEDVVCsrNTSWNVKPEPPKTPVQAMPAQQSWFPR  
ADMPSFGVVPAPHQLISPRVPSNMNLQSVNPASSEQAPGNDHSSASWSDFGGCLNF  
NWLYNASTPRPVFERSNLPTSLNNEASKMLPPQVIPPEARDKVELVKLRTTPALVQP  
CKLFGFDLADKKVPSSTLAPSHGEVSEVTVELLRTDLTSGGHLGNKLTAECSQATQAHV  
TPMRSGIKVYQPGKVGRTIDLKCESYGLRRVLANLFLNLQGLDDVTGWQLVYTDHEN  
DVLVGDVDPWEEFCGVRSLKILSPQDVAGQSVGKFTSSCENDDGRQ-

>Pp\_108888

MASGVGESVDRDLAQLWHACAGGMVQLPQVGAQVIYFPQGHGEQAATTPDFSASMGPSGT  
IPCRVVSVNFLADTETDEVFARMRLQPEGLHGLNDMTEEAPSSPPPEKPAFAKTLTQSD  
ANNNGGGSVPRYCAETIFPLDYSSDPPVQTVLAKDVHGDVWKFRIYRGTPRRHLLTTG  
WSTFVNQKLVAGDAIVFLRSASGELCVGVRSMRGAMGDNGHGGSSNGVSRSGSQGAST  
TSSFARNRARVTAKSVLDAALAVAGKPFVYVYPRASTAEFCVKAGLVKQALDHTWYAG  
MRFKMAFETEDSSRISWFMGTIAAVKPADPLLWPNSPWRVTWDEPDLLQGVSRVSPWQVE  
LVATLPMQLPPFSYPKKLLRAVQPQELHFAQQLPTPWGGPALLENASAGMQGARHDRFNG  
PPSMDFRGRLPPAVKGCGLTMGLMPGGSPTRDDGGSNSKSKLKSSPAPTTFLFGQSID  
PSSNSKAAQEQCVASASSSVEGYRQNEGGPWPELSIGTEHCKVFRGDEVGRTLDLANFK  
SYEEVYDRLAGMFSVPAASFKNRVVYQDGEGETLPVGAEPYGNFVA AVRRLTILP-

>Pp\_61245

MQGARHDRFNGPPSMDFRYSNYKRAREHPSENQYAEQQQTSPAGSARVVLSDPLCGDSSH  
QFSFLSSGQAHNQQQQQQSSQMSGGLTMGLMPGGSPTRDDGGSNSKSKLKSSPAP  
TTFLFGQSIDPSSNSKAAQEQCVASASSSVEGSSLFQEGRLVSPTS YSSSDNTLEHKDR  
MRRFNADLNGASGGTGDGAMSR YRQNEGGPWPELSIGTEVGLKWFKEQRLEKEKGSNEA  
LQHCKVFRGDEVGRTLDLANFKSYEEVYDRLAGMFSVPAASFKNRVVYQDGEGETLPVGA  
AEPYGNFVA AVRRLTILP-

>At\_B3\_Family\_Protein\_At1G16640

MADTGEVQFMKPFISEKSSKLEIPLGFNEYFPAPFPITVDLLDYSGRSWTVRMKKRGEKVFLTVGWENFVKDNNLEDG  
KLQFIYDRDRTFYVIIYGHNMCSERYDFPQVA VEVDYENGEEDGDDQDKHQ\*

## ASA1,2

>ASA1\_AT5G05730

MSSSMNVATMQALTFRRLLPSVASRYLSSSVTVTGYSGRSSAYAPSFRSIKCVSVSPE  
ASIVSDTKKLADASKSTNLIPIYRCIFSDQLTPVLA YRCLVKEDDREAPSFLFESVPEGS  
QMSSVGRYSVVGAPAMEIVAKENKIVMDHNNETMTEEFVEDPMEIPRKISEKWNPDQP  
LVQDLPAFCGGWVGFYSYDTRVYVEKRKLPFSKAPEDDRNLPDMHLGLYDDVVVFDHVE  
KKAYVIHWIRLDGSLPYEKAYSNGMQHLENLVAKLHDIAPPKLAAGNVNLQTRQFGPSLD  
NSNVTCEEYKEAVVKAKEHILAGDIFQIVLSQRFERRTFADPFVYRALRVVNPSPYMGY  
LQARGCILVASSPEILTKVKQNKIVNRPLAGTSKRGKNEVEDKRLEKELLENEKQCAEHI  
MLVDLGRNDVGKVTKYGSVKVEKLMNIERYSHVMHISSTVTGELQDGLTCWDVLRAALPV  
GTVSGAPKVKAMELIDELEPTRRGPYSGGFGVVSFTGDMIALSLRTIVFPTACQYNTMY  
SYKDANKRREWVA YLQAGAGVVADSDPQDEHCECQNKAAAGLARAILAESAFVKK-

>ASA2\_AT2G29690

MSAVSISAVKSDFFTVAEIAVTHHRTPHPPHPSLRFPLSLKSPATSLNLVAGSKLLHF  
SRRPLSIKCSYTPSLDLSEEQFTKFKKASEKGNL VPLFRVFSDDLTPILAYRCLVKEDD  
RDAPSFLFESVPEGSQSSNIGRYSVVGAPQITIEIVAKGNVVTVMHDGASLRTEEEVDDPM  
MVPQKIMEEWNPOGIDELPEAFCCGGWVGYFSYDTRVYVEKLLPFSNAPEDDRSLPDVNL  
GLYDDVIVFDHVEKAYVIHWVRIDKDRSVEENFREGMNRLESLTSRIQDQKPPKMPTGF  
IKLRTQLFGPKLEKSTMTSEAYKEAVVEAKEHILAGDIFQIVLSQRFERRTFADPFYIYR



ALRIVNPSPYMAYLQVVRGCVLVAASSPEILLRSKNRKITNRPLAGTVRRGKTPKEDLMLEK  
ELLSDEKQCAEHIMLVDLGRNDVGVKSKPGSVEVKKLDIEWFSHVMHISSTVVGELLDH  
LTSWDALRAVLPVGTVSGAPKVKAMELIDELEVTRRGPYSGGFGGIFNGDMDIALALRT  
MVFPTNTRYDTLQYKHPQRRREWIAHIQAGAGIVADSNPDEHRECENKAAALARAIDL  
AESSFLEAPEFTTITPHINNI-

>AT3G55870

MIKRLQVSVSNLLSQDITLPLFVVGAPKMEIVAKENKVTVMHDVKGTKTTEEVEDPMMI  
PRRISETWPKQLIDDLDPVFCGGWVGYFSYDTPVYAEKRKPLSKAPVDDRNLPMHLGL  
YDDVVVFDHVEKIIIIHWVRLSENSSFDDVYANAVKHLEELVSRIKCMNPPKLPYGSVD  
LHTNQFGTPLEKSSMSTDA YKNAV LQAKEHILAGDIFQIVLSQRFERHTFAHPFEVYRAL  
RIVNPSPMCYLQARGCILVASSPEILTRVKKNKIVNRPLAGTARRGKSFEEDQMLEEAL  
LKDEKQCAEHIMLVDLGRNDVGVKSKNGSVKVERLMNIERYSHVMHISSTVIGELQENLT  
CWDTLRAALPVGTVSGAPKVKAMELIDELEVTRRGPYSGGFGVSFTGMDIALALRTIV  
FPTQARYDTMYSYKDKDTPREWIA YLQAGAGIVADSDPEDEHRECQNKAAGLARAILDA  
ESAFVDSDDTI-

>ASB1\_AT1G25220

MAASTLYKSCLLQPKSGSTTRRLNPSLVNPLTNPTRVSVLGGKSRDVFASIEMAESNS  
IPSVVNVSSKQHGPIVIDNYDSFTYNLCCQYMGELGCHFVYRNEDELTVLKKKNPRGV  
LISPGGTPQDGSIGLQTVLELGPLVPLFGVCMGLQCIGEAFFGKIVRSPFGVMHGKSSM  
VHYDEKGEEGLFSGLSNPFIVGRYHSLVIEKDTFSPDELEVTAWTEDGLVMAARHRKYKH  
IQGVQFHPESIITTEGKTIVRNFIKIVEKKESEKLT-

>Volca1|103239|estExt\_fgenesh4\_pg.C\_40325

MEDPMLPESLSRNWRPARVDGIPDVTGGWVGYAGYDTRVYVYGNKLPFESAPTDDRQLPDMHLALYYD  
VVVFDQATKILYPIVWVSEQDAASPEALRAAYDAGLARLRLAARLSSAPPAASLTPGAISLDLNRKRP  
ALPSNSNMTKQARAEGPPWGEGLVAPEFMDAVAATKEHIQAGDIFQLVLSQRFERRTFASPFEIYRALR  
VVNPSPYMVYMQARGCHIVSSPEILCRVDNNGRVVTRNRPLAGTRPRGKDEADKALEADLLADAKEIAEH  
VMLVDLGRNDVGVKSVSGSVVVRKLMEVERYSHVMHISSTVTGQLLPQLDAWDALRAALPAGTVRAMQII  
DELEANRGPYGGGIGHVSFTGAMDALGLRTMIIPDSAADTLYKYDAPAAPGCPPRREWSVHIQAGAGI  
VADSRPESEYEETVNKAAALGRAIDLAEQAFVEDGKVA\*AA\*

>Chlre3|115047|e\_gwW.12.12.1

SASGASADAGFQKFLDAVKSGANLVPLSQRIFSDHLTPVSA YRCLVPEGDSQLPSFLLESVVNGDQQGRY  
SFLGSSPALEVVATQDRVLLDHDKGSRTVTS MADPMLPEEISRNWRPAAVDGIPNVFTGGWVGYAGYD  
TVRYVYGSKLFPDGAPEGDRGVGRVCLAVLSVLA VRGGSEGTTPMTASDPAALRSAYEAGSRLAAL  
AKLAAGPVAGAAFRPALSGLLPGAISLDLNRPEAPGNSNMTKQEFMDAVGATKEHIQAGDIFQLVLSQ  
RFERRTFATPFEIYRALRVVNPSPYMVYMQARGCHIVQPGDPHAPGSTFPAPTRRLHTRHTHTNTQTH  
KHTHAYTADLLADQKEIAEHVMLVDLGRNDVGVKVA VSGSVVVKLMEVERYSHVMHISSTVTGELLPLQLD  
SWDALRAALPAGTVSGAPKVRAMQIIIDELEVNRKGPYGGGVGHVSFTGAMDALGLRTMIIPDAADTLY  
KYTSTPAAPGAPRREWSVHIQAGAGIVADSKPEAEYEETVNKAAALGRAVDLAEQAFVADGRSTA\*

>MicpuC2|16051|e\_gw1.4.149.1

MACIIGATQAHAASASSRGRGSAATAATTRVAAANGEKILRKNRPSLAASVPSHGSSARRVATAR  
AIADGPAPAAAPAAASAAKRAAPRSTQDEFRALVGAGHNLVPLYRRIFDDQLTPILAYRCLVK  
EDERDAPSFLESVVGTTQTRGFSFLGSRPYLEVIKESCVVLDHAGTKTRSTESDPMAVAQQIATKW  
HPTRTEGLPECFTEGGWVGYTYDTRVYQYLNKLPFGDAPTDDRALPDLCLGLYRDVVVFDHATKQVYAVH  
VVDTTVFGGDVEASLEDGERCLHDLVKALQPSSAPTLPFGEVMSLTPPTPPKDDSTMTKEAFLNAVAET  
KEHIVAGDIFQLVLSHRFQRSTFADPFEVYRALRVVNPSPYMIYLQARGSIVASSPEILCRTDKHRTVV  
NRPLAGTRMRGKTKEEDDALELDLLEDEKEKAHVMLVDLGRNDVGRVSKAGTVKVEKLMIEERYSHVMH  
ISSTVTGSLLEDLGPWDVLKAAALPVGTVSGAPKVRAMQIIIDELETTTRGPYGGGVGYVGFMGEMDMALAL  
RTMVIPTHEKENLYEFRNGIEGKSRRREWTHLQAGAGIVADSNPESEYQETVNKAAALGRAIDLAEAEAFE  
DV\*

>MicpuN2|79310|e\_gw2.02.162.1

MKLAEEGHNLIPL YRRLFNDQLTPILAYRCLVKEDERDAPSFLESVVGTTQTRGFSFLGSRPYMEVMAK  
ENHVSILDLKGERTRSDTDPITVAGKISERWNP CRTNGLPECFTGGWVGYMGYDTRVYQYLNKLPFEE  
APGDDRALPDLCLGLYRDVVVFDHATKQLYAVHVVDVDTLHDGDAALTEGEESLDALVRALQPDSVPTL  
PFGEVMSLTPPTPADSTMSKEEFLAAVADTKEHIKAGDIFQLVLSHRFQRSTYADPFVYRALRVVN  
PSPYMIYLQARGSILVASSPEILCRTDKERTVNRPLAGTRMRGKTEEDVALEVDLLADKKEKAHVML  
VDLGRNDVGRVSKAGTVKVEKLMIEERYSHVMHISSTVTGSLDELGPWDVLRALPAGTVSGAPKVRAM  
QIIDLEVTRRGPYGGGIGYVGTGEMDMALALRTMVVPTAHTDNIYKFSKEASEPPRAKREWVHIHLQAG  
AGIVADSNPESEYQETVNKAAALGRAIDLAEAEAFDV\*

>Ostta4|8553|fgenesh1\_pm.C\_Chrom\_07.0001000017

MAARETLRDACGDVVRGGHNVVYRRIFFDDQLTPILAYRLLVKEDDREAPSFLLESVVGGSQVGRFSL  
GRRPVMEVTA KDYEVTTHHGTGRSETTTETDPMV MKRISAEWRCTMSGLPECFSGGWVGTGYDTRV  
YQYKSKLDFGEAAPKDDRSLPDIHLGLYRDVVVFDNATKQLYAVHVWMTDEYANVDEAYHKGMDAVDALI  
DDLQPSKSPTLKQGFVNLLQDQRPSVPKDDSTMTKDEFLLGAVATKEHIKAGDIFQLVLSHRFQRQTHADP  
FEVYRALRVVNPSPYMIYQGRDCILVASSPEILCRVNKERTVNRPLAGTRMRGKTQEEDALEADLLA  
DQKECAEHVMLVDLGRNDVGRVSKAGTVKVEKLMIEERYSHVMHISSTVTGSLVDNLGPWDVLRALPAG  
TVSGAPKVRAMQIIDLEVTRRGPYGGGIGYVGTGEMDMALALRTMVVPTRAKDVNGSREWMIHLQAG  
AGIVADSNPESEYQETVNKAAALGRAIDLAEAFSAD\*

>Ost9901\_3|87709|ost\_07\_005\_085  
VARETQRAAFDRALSLGNNVVPVLYRRIFDDQLTPILAYRLLVKEDEREAPSFLLESVVGGTQIGRYSFLG  
RRPVMEVTAADYEVTVTRHEGGGAASETTERRDPMVEMKRIGESWRACKTPGLPDCFAGGWVGFYDVT  
RYQYQSKLGFEGAPKDDRSLPDIHLGLYKDVVFDNATKQLYAVHVMVDEYSSADEAYTTGMDALDAMI  
DDLQPSKSPMKQGYVNLNLRPSEPKDSTMTKDEFGLGAVAATKEHIKAGDIFQLVLSHRFQRKTSVDP  
FEVYRALRVVNPSPYMIYYQGRDCILVASSPEILCRVDKARTVVRNPLAGTRMRGKTPEEDEALEVDLLA  
DEKERAHEVMLVDLGRNDVGRVSKAGTVKVEKLEMEIERYSHVMHISSTVTGNLVDLGPWDVLAALPAG  
TVSGAPKVRAMQIIDNLEVTRRGYGGGIGYVGFTEGEMDMALALRTMVPTRQAKETNGSREWMHILQAG  
AGIVADSNPESEYQETVNKAAALGRAIDLAEAFD\*

>Chlvu1|32616|e\_gw1.16.28.1  
SDSEFARFKEAAERGNLVPFLFERIFADQLTPVTA YRCLVAEDDREAPSFLFESV VNGTQTGRYSFVGAQP  
AMEVVARGHSVTVIDHASQQRSTRIEDDPMEVA VRLSADWRPVPTDGLPAVFTGGWVG YCYDVTYRYVYS  
GKLPFESAPKDEDGLLDLHLALYNNIIVFDHATKLA YCVAVWHMGAAHAGVPEAYLAGKRALAAMTDRISP  
LRTPNLPLGKACSCSSYLPAPIEILCMGAKDWIREQYIACVDEVKEHIQAGDIFQLVLSHRFKRRTFAD  
PFEVYRALRVVNPSPYMIYLQARGCILVASSPEILCHVSEDRVVTNRPLAGTRRRRGKTPDEDEALEGELL  
SDEKECAEHVMLVDLGRNDVSEAGSVRVEKLEMEVERYSHVMHISSTVTGHLQPQLNAWDALRAALPAGTV  
SGAPKACPTITSQSLCSALHVRAMQIIDLELECAKRGYPYGGGIGHVSVFTGGMDMALALRTMVIPTAATDTL  
YDYGVDKSRREWVIHVQAGAGLVADSVPAEYEEETVNKAAAGLGRAIDLAEQAFQAPEGR\*

>ChINC64A\_1|25481|e\_gw1.16.21.1  
MQGNLVPVYERVMADQLTPVLA YRCLVKEDDREAPSFLFESVTNGSQGGRYSFVGATPALEVVARGQQVH  
VMDHRRGTRDSQTVADPMQVAIDLSSHWRPVRSDGLPFVFTGGWVG YTG YDVTYRYVYSGLKPFEEAPEDD  
RGLADIHLALYNDV VFDHATKLA YVISVWHLGDYGSVEEAYLAGKRRLAATAAKIANQNAPQLNGKVS  
LSLSQRPRTATSNNMSKEEFLGAVEATKEYIQAGDIFQLVLSQRFFERTFADPFEIYRRGWAGSLRVVNP  
PYMAYLQARGCIVVASSPEILCRVGEDGTVTNRPLAGTRRRRGKTPQQDAELEADLLADEKECAEHVMLVD  
LGRNDVGVKVSQAGSVKVEKLEMEVERYSHVMHISSTVTGSLSPGLTSWDALRAALPAGTVSGAPKVRAMQI  
IDELEVNRGYPYGGGIGHVSVFTGGMDMALALRTMVIPTAHHDTLYSYGGSKPRREWV VHLQAGAGLVADSV  
VPESEWEETVNKSAALGRAIDLAEQAFVAADAGGGQ\*

>Selmo1|414586|fgenesh2\_pg.C\_scaffold\_24000106  
MAACGAFEFQAIVDLPRRIHRQRQLTKWRSGSA VRASSQAQAQFHEACKRGNL VPLFQRIFSDHLTPVL  
AYRCLVKEDDREAPSFLFESVEHTNGVSNVGRYSMVGAQPA MEIVAKENMLTIISHEDGYENERIVDDPM  
KEPEEITSDWSPVPVDGLPNVFCGGWVG YFSYDVTYRYSEK KIPFASAPLDDRGLPDMHLGLYKDVIVFD  
HVTKIA YAVHWDIRRYEDPNTAFQDGGKRLQELIDRVQNTTEVPRLSHGNVNL SVGHYGNRVNKS NMSLD  
QFKGAVLAKEHILAGDIFQVLSQRFFERTAADPFEVYRALRVNPSYMIYLQARGSILVASSPEILT  
RIKHGKVINRPLAGTRRRGVSEEDKKELESLLKDEKECAEHVMLVDLGRNDVGVKVSQAGSVQVEKFMV  
ERYSHVMHISSTVTGELQEGLSWDALRAALPVGT VSGAPKVRAMQLIDELELTRRGYPYGGGIGSISFNG  
DMDVALALRTMVPFTRSDKNGSWLAHLQAGAGV VADSIPDEEYNETVNKAAAGLGRAIDLAEAFPAEKL  
MEDNVLEKSNLGSERKPSDYFWKVP\*

>Phypa1\_1|129600|e\_gw1.77.21.1  
MIHLSLRIISGRSQFLEAAQRGNVVPVYRRIFSDHLTPVLA YRCLIKEDDRDAPSFLFESVENGK SINMG  
RYSIVGVQPSLEIIAKEDRIILNHEEGKTREEKQSD DPLNEPQEIASKWNPVKIDSIPDIFCGGWVG YFS  
YDVTYRYVEK KKLAFSSAPKDDRGLPDIHLGLYNDVLVFDHVTKLLYV LHWVHVVDQFDSLES AFEDGCKKL  
DHLVARLQAPEGVLEPSASVEMSVK YGQSATKSNFTPEQFKDSILQVKEHILAGDIFQLVLSQRFFERT  
FAYPFEVYRALRVNPSYMIYLQARGAIMVASSPEILTRISKGT VVNRPLAGTRKRKGTPEEDMAMERD  
LLGDEKECAEHVMLVDLGRNDVGVKVSQAGTVKVEKFM EIERYSHVMHISSTVTGELLDLSSWDALRAAL  
PVGTVSGAPKVRAMELIDELEPTRRGYPYGGGIGVSVFTGQMDIALALRTMVPFTRNDAMYSYKDANSRR  
EWWWHLQAGAGIVADSDAESEYLETINKAAGLARAIDLAEAFCKTIT\*

>Phypa1\_1|190951|estExt\_gwp\_gw1.C\_1540078  
MIYLPFKIITGRSQFLEAAQRGNLVPVYRRIFADHLTPVLA YRCLVKEDDREAPSFLFESVENGK SINMG  
RFSMVGAQPSMEIIAKEDRITILNHEEGTRIEKQSDNPLNEPQEIASKWNPVKIDSLPDVFCGGWVG YFS  
YDVTYRYVEK KKLPFSSAPNDDRGLPDIHLGLYNDVLVFDHVTKL VYV LHWVHVDRFDNPESAYEDGCKRL  
ELLVARLQTPGGVKLSSGSVELSIGQCGQRTAKSNY TPEQFKDSILQVKEHILAGDIFQLVLSQRFFERT  
FADPFEVYRALRVNPSYMIYLQARGAIMVASSPEILTRIAERTV VNRPLAGTRRRRGKTPDEDMAMEKD  
LLADEKECAEHVMLVDLGRNDVGVKVSQAGTVKVEKLEMEVERYSHVMHISSTVTGELLDLSSWDALRAAL  
PVGTVSGAPKVRAMELIDLEPTRRGYPYGGGIGVSVFTGQMDIALALRTMVPFTRNDAMYSYKQANSRR  
EWWWHLQAGAGIVADSDPESEYQETVNKAAAGLARAIDLAEAFVKIDT\*

>Phypa1\_1|139162|e\_gw1.154.7.1  
MIYLPFKRILGRSQFLEAAQRGNLVPVYRRIFADHLTPVLA YRCLVKEDDREAPSFLFESVENGK SINMG  
RYSMVGAQPSMEIIAKEDRITILNHEEGTRVEKQSDNPLNEPQEIASKWNPVKFDSLPDVFCGGWVG YFS  
YDVTYRYVEK KKLPFSSAPIDDRGLPDIHLGLYNDVLVFDHVTKL VYV LHWVHVDRFDNPESAYEDGCKRL  
DLLVARLQTPGRVKLSSGSVELSIEQYQRTAKSNY TPEQFKNSISLVKEHILAGDIFQLVLSQRFFERT  
FADPFEVYRALRVNPSYMIYLQARGAIMVASSPEILTRIAEGTV VNRPLAGTRRRRGKTPPEEDMALERD  
LLADEKECAEHVMLVDLGRNDVGVKVSQAGTVKVEKLEMEVERYSHVMHISSTVTGELLDLSSWDALRAAL  
PVGTVSGAPKVRAMELIDLEPTRRGYPYGGGIGVSVFTGQMDIALALRTMVPFTRNDAMYSYKQANSRR  
EWWWHLQAGAGIVADSDPESEYQETVNKAAAGLARAIDLAEAFVKIDT\*

## **ASB1**

>ASA1\_AT5G05730  
MSSSMNVATMQALTFRRLLPSV ASRYLSSSVTVTGYSGRSSAYAPSFRSIKCVSVSPESIVSDTKKL

ADASKSTNLIPIYRCIFSDQLTPVLA YRCLVKEDDREAPSFLFESVEPGSQMSSVGRYSVVGAPAMEIV  
AKENKAVEDDRNLPMHMLGLYDDVVFHVEKKA YVIHWIRLDGSLPYEKAYSNGMQHLENLVAKLHDIEP  
PFLAAGPNVNLQTRQFGPSLDSNVTC E EYKEAVVKAKEHILAGDIFQIVLSQRFERRTFADPFVYRALR  
VVNPSPYMGYLQARGCILVASSPEILTKVKQNKIVNRPLAGTSKRKNEVEDKRLEKELLENEKQCAEHI  
MLVDLGRNDVGKVTKYGSVKVEKLMNIERYSHVMHISSTVTVGELQDGLTCWDV LRAALPVGTVSGAPKVK  
AMELIDELEPTRRGPSYGGFGGVSFTGDMDIALSLR TIVFPTACQYNTMYSYKDANKRREVVAYLQAGAG  
VVADSDPQDEHCECQNKAAGLARAI DLAESAFVKK-

>ASA2\_AT2G29690

MSAVSISAVKSDFFTV EAI AVTHHRTPHPPHPSLRFPLSLKSPPATSLN LVAGSKLLHFSRRLPSIKCS  
YTPSLDLSEEQFTKFKKASEKGNL VPLFR CVFSDHLTPILAYRCLVKEDDRDAPSFLFESVEPGSQSSNI  
GRYSVVG AQPTIEIVAKGNVTVMDHGASLRTEEEVDDPMMVVPQKIMEEWN PQGIDELPEAF CGGWVGYF  
SYD TVRYVEKKKLPFSNAPEDDRSLPDVNLGLYDDVVFHVEKKA YVIHWIRLDKDRSVEENFREGMNR  
LESLSRIQDQKPKMPTGFIKLR TQLFGPKLEKSTMTSEAYKEAVVEAKEHILAGDIFQIVLSQRFERR  
TFADPFVYRALRIVNPSPYMAYLQVRGCILVASSPEILLRSKNRKITNRPLAGTVRRGKTPKEDLMLEK  
ELLSDEKQCAEHIMLVDLGRNDVGK VSKPGSVEVKKLDIEWFSHVMHISSTVVGELLDHLTSWDALRAV  
LPVGTVSGAPKVKAMELIDELEVTRRGPSYGGFGGIFNGDMDIALALRTMVFPTNTRYDTL YSYKHPQR  
RREWIAHIQAGAGIVADSNPDEHRECENKAAALARAIDLAE SSFLEAPEFTTITPHINNI-

>ASB1\_AT1G25220

MAASTLYKSCLLQPKSGSTTRRLNPSLVNPLTNP TRVSVLWKSRRDVF AKASIEMAESNSIPS VVVNSSK  
QHGP IVIDNYSFTYNLCQYMGELGCHF EYRNDDELTV EELKKNPRGVLISPGPGTPQDSGISLQTVL  
ELGPLVPLFGVCMGLQCIG EAFGGKIVRSPFGVMHGKSSMVHYDEKGEEGLFSGLSNPFIVGRYHSLVIE  
KDTFPSDELEVTA WTEDGLVMAARHRKYKHIQGVQFHPESIITTEGKTIVRNFIKIVEKKESEKLT-

>ASB1-like\_AT5G57890

MAATTLYN SCLLPKYGFTTRRLNQSLVNSLTNP TRVSVLWKSRRDVIAKASIEMAESNSISSVVVNSSG  
PIVIDNYSFTYNLCQYMGELGCHF EYRNDDELTV EELKKNPRGVLISPGPGTPQDSGISLQTVLELG  
PLVPLFGVCMGLQCIG EAFGGKIVRSPFGVMHGKSSMVHYDEKGEEGLFSGLSNPFIVGRYHSLVIEKDS  
FPSDELEVTA WTEDGLVMAARHRKYKHIQGVQFHPESIITTEGKTIVRNFIKIVEKKESEKLA-

>ASB1-like\_AT1G24807

MAESNSIPS VVINSSKQNGPIVIDNYSFTYNLCQYKQNFENCYLFLQYMGELQCHF EYRNDDELTV E  
LKRKNPRGVLISPGPGTPQDSGISLQTVLELGPLVPLFGVCMGLQCIG EAFGGKIVRSPFGVMHGKSSMV  
HYDEKGEEGLFSGLSNPFIVGRYHSLVIEKDTFPSDELEVTA WTEDGLVMAARHRKYKHIQGVQFHPESI  
ITTEGKTIVRNFIKIVEKKESEKLT-

>ASB1-like\_AT1G24909

MAESNSIPS VVINSSKQNGPIVIDNYSFTYNLCQYMGELQCHF EYRNDDELTV EELKRKNPRGVLIS  
PGPGTPQDSGISLQTVLELGPLVPLFGVCMGLQCIG EAFGGKIVRSPFGVMHGKSSMVHYDEKGEEGLFSG  
LSNPFIVGRYHSLVIEKDTFPSDELEVTA WTEDGLVMAARHRKYKHIQGVQFHPESIITTEGKTIVRNFI  
KIVEKKESEKLT-

>ASB1-like\_AT1G25083

MAESNSIPS VVINSSKQNGPIVIDNYSFTYNLCQYMGELQCHF EYRNDDELTV EELKRKNPRGVLIS  
PGPGTPQDSGISLQTVLELGPLVPLFGVCMGLQCIG EAFGGKIVRSPFGVMHGKSSMVHYDEKGEEGLFSG  
LSNPFIVGRYHSLVIEKDTFPSDELEVTA WTEDGLVMAARHRKYKHIQGVQFHPESIITTEGKTIVRNFI  
KIVEKKESEKLT-

>ASB1-like\_AT1G25155

MAESNSIPS VVINSSKQNGPIVIDNYSFTYNLCQYMGELQCHF EYRNDDELTV EELKRKNPRGVLIS  
PGPGTPQDSGISLQTVLELGPLVPLFGVCMGLQCIG EAFGGKIVRSPFGVMHGKSSMVHYDEKGEEGLFSG  
LSNPFIVGRYHSLVIEKDTFPSDELEVTA WTEDGLVMAARHRKYKHIQGVQFHPESIITTEGKTIVRNFI  
KIVEKKESEKLT-

>ChINC64A\_1\_11586\_gw1.8.205.1

AVCAAAA AEKGPVVVDNYSFTYNLCQYLDLGC EYVFPNDAKTVEEIRAMNPRGILVSPGGRPEDS  
GISLEIVEKLGPLGFPVFGVCMGHQCIGQVFGGNVVRAPSGVMHGKTSVPVFHTSVGLLEGLDNPFAARY  
HSLVIDKESCEPELEVTA WCEDGTIMGVRHRAYPHIQGVQFHPESIITDNGMRIVRN FVE

>Chlre3\_79042\_estExt\_GenewiseW\_1.C\_10279

MQASLRARARPF TSGAQPSLRRAPARVCRPVASAAA AKGPVVVDNYSFTYNLCQYLDGFGVDYVYVK  
DEKTVDEIRAMNPRGILVSPGGRPIDSGISLQTVRELGPDFPLFGVCMGHQCIG EAFGGDVVRAPCGVM  
HGKTSVPVFHTNVGLLEGLPNPFEACRYHSLVIKRD T IPEDELEVTA WTEDGTIMGVRHKKYPHIQGVQFHP  
ESIITQSGKKIVENFVKTL\*

>Chlvu1\_75013\_fgeneshCV\_pg.C\_scaffold\_12000218

MLACIAASNGKASGPVIVVDNYSFTYNLCQYLDLGC EHVILKNDEKTV E EIREMQPRGILVSPGGRP  
EDSGISLQIVQELGPELPVFGVCMGHQCIGQVFGGNVVRAPGGAMHGKTSLVYHNNTSLLKGLQNPFAA  
RYHSLVIDKDCSPDDLEVTA WTEDGVIMGVQHKQFPHIQGVQFHPESVITFEGKTIVQNFIDCL\*

>MicpuN2\_84762\_e\_gw2.09.414.1

MGGGVAAKGRRAAVFCCAASLVKDDGRPVIIIIDNYSFTYNLSQYLDLGDQDHVVFKNDEKTV E EIRAMN  
PKGIMVSPGGRPEDSGISLEACEKLGPEFGVFGVCMGHQCIGQVFGGTVIRAPCGLMHGKSSPVWHTED

AATMLAGLPSFQAARYHSLVISRDDFPDELEVTAWTEDETIMAVRHRYPKIQGVQFHPESIITENGL  
TIIRNWVALINA\*

>MicpuC2\_23759\_e\_gw1.18.140.1

MSVAATTTTTIAKASPARGLAARSTAATTTTGGGLGRRRRSSDAARRRRRGVARRVGVVLAASKGDD  
RPVVIIDNYDSFTYNLSQYLDLGCHEVYVYKNDKTVAEIAAMNPKGVMSVSPGPRPESGISLEACEKL  
GPEFGVFGVCMGHQCIGQVFGGTVVRAPCGLMHGKSSPVWHTEEGQLLHGLPRRVPISRRPFEAARYHS  
LVISREGFPEDELEVTAWTKDQTIMAVKHKRYPKIQGVQFHPESIITENGLHIIRNWVNLIDA\*

>Ost9901\_3\_38312\_e\_gwEuk.10.378.1

MATVRAATPTTRGATTATRTTTTTTTTRWTGRRRRAGAAARATREDAARPVVIIDNYDSFTYNLSQYLDG  
CGCAHAYVKNDEVTVEEVRAMRPRGVMSVSPGPRPESGISLDVRELGPFGVFGVCMGHQCIGQVFGG  
DIVRAPTGLMHGKSSPVTHRTDLDTVLSGLPSPFQAARYHSLVISRDNFPEDALETAWTEDGTVMAVKH  
KAYPWIQGVQFHPESIITENGLLIVKNWVKMINDRAAESEELARA\*

>Osta4\_19644\_e\_gw1.10.00.307.1

MRARASASASARRAVRAPRWCAPGRRATATATRRDPRFAASARPVVIVDNYDSFTYNLSQYLDGCGCD  
HVVVKNDEITVEALRAMNPRGVMSVSPGPRPESGISLDVRELGPFGVFGVCMGHQCIGQVFGGDIVR  
APTGLMHGKSSPVWHRVEVDLTLGLPSPFQAARYHSLVISRENFPDSELEITA WTEDETIMAVKHKKYP  
WIQGVQFHPESIITENGLTIVRNWVNLINARAENAAG\*

>Phypa1\_1\_17808\_gw1.198.53.1

KRGSVIVIDNYDSFTYNLCQYLDLGCCKIEVYRNDEITVEELKAKKPRGVLSIPGPGTPQDSGISLQIVR  
ELGPTIPLFGVCMGLQCMGEAFGGKIVRAPNGVMHGKTSVPVHDEKGEPLDGLPSPFTACRYHSLVIE  
EATFPADQLEVTAWTEDGLVMGVRHKVYKHIQGVQFHPESIRTQNGMQIVGNFLKILDRKEA

>Phypa1\_1\_152946\_e\_gw1.381.28.1

MTRRSHGQFALRVQAAVGVKERVLERNDKEKGSVVVIDNYDSFTYNLCQYLDLGCCKIEVYRNDEITVEE  
IRKKKPRGILISPGPGTPQDSGISLEIVRKLGPITPLFGVCMGLQCMGEAFGGKIVRAPNGVMHGKTSVP  
FYDEGGEVGLDGLPSPFTACRYHSLVIEEATFPADQLQATAWTEDEGLVMAVRHRVYKHIQGVQFHPESI  
RTQNGMQIVSNFLKILDWKEALEAEAKVLETD\*

>Selmo1\_404845\_fgenes2\_pg.C\_scaffold\_3000068

MSKWSKVADSSSAPLRRWVQIPLLTSLFTFIRNKGEASCKAVPRLGVHRPTVCGILDASERNQRTLLE  
FGKHMDQINVTTFVGLTVSCNCTNAFIALVNLKARSDELEITA WTEDEGLIMGMRHSKYKHVQFHPEGIIS  
QNGKQILENYIRFVNQLQESRGPFLAGTRGGGGGA\*

>Selmo1\_421049\_fgenes2\_pg.C\_scaffold\_49000070

MAKWSKVADSSSAPLKRAVWVQIPLLTSLFTFIRNKGEASCKAVPRLGVHRPTVCGILNASERNQRTLLE  
FGKHMDQINVTTFVGLTARSDELEITA WTEDEGLIMGMRHSKYKHVQFHPEGIISQNGKQILENYICFMNL  
QESRGPFLAGRRGGGGGA\*

>Selmo1\_79368\_e\_gw1.3.1454.1

KSRSPVVVIDNYDSFTYNLCQYLDLGCCEVYVYRNDEISVQALKSKRPRGILISPGPGTPQDSGISLQTV  
KELGPSIPLFGVCMGLQCIGEAFFGGKIVRAPNGVMHGKVSSVYYDEKGEPIGIFGLPNPFTACRYHSLVI  
ERETFPGDELEITA WTDGLIMGVRHRKYKHIQAVQFHPESIITQNGKQILENYTRLMNQLQESRVEDEEP  
FLAGRRGGTGA\*

>Volca1\_81469\_estExt\_Genewise1Plus.C\_230122

MRS LAPREARAPFACPGSSRVARPLLRRTPCCRVPQASAAAKGPVVVVVVDNYDSFTYNLCQYLDLGCCEYV  
VYKNDKTVVEEIKAMNPRGILVSPGPRPVDSGISLQAVRELGPLPFLFGVCMGHQCIGEAFFGGDVRAP  
CGVMHGKTSVPFHTNVGIMEGLPNPFQACRYHSLVIKRDITPEDELEITA WTEDEGTIMGVRHRKYPHIQGV  
QFHPESIITQSGMKIVENFVKSL\*

## AUX1/LAXs

>AtAAP1\_At1G58360

MKSFNTEGHNHSTAESGDAYTVSDPTKNVDEDGREKRTGTWLTASAHIITAVIGSGVLSLAWAIAQLGWI  
AGTSILLIFSITYFTSTMLADCYRAPDPVTGKRNRYTMDVVRSYLGGRKVLQCGVAQYGNLIGVTVGYT  
ITASISLVAVGKSNCFHDKGHTADCTISNYPYMAVFGIIQVILSQIPNFHKL SFLSIMAAVMSFTYATIG  
IGLAIATVAGGKVGKTSMTGTAVGVDVTAQAQIWRSFQAVGDI AFAYAYATV LIEIQD TLRSSPAENKAM  
KRASLVGVSTTTFFYILCGCIGYAAFNNAPGDFLTDGFGEFPFWLIDFANACIAVHLIGAYQVFAQPIF  
QFVEKCKNRNYPDNKFITSEYSVNVPLGKFNISLFRVWRVTA YVVITTVVAMIFPFFNAILGLIGAASF  
WPLTVYFPVEMHIAQTKIKKYSARWIALKTMCYVCLIVSLLAAAGSIAGLISSVKTYKPFRTMHE

>AtLAX3\_At1G77690.1

MAAEKIE TVVAGNYLEMEREENISGNKKSSTKTKLSNFFWHGGSVYDAWFSCASNQVAQVLLTLPYSFS  
QLGMMSGILFQLFYGLMGSWTA YLISVLYVEYRTRKEREFDRNHVIQWFEVLDGLLGKHWNLGLIFN  
CTFLLFGSVIQLIACASNIYYINDKLDKRTWTYIFGACCATTVPFIPSFHNYRIW SFLGLAMTTYTSWYLT  
IASLLHGQAEDVKHSGPTTMVL YFTGATNLYTFGGHVA TVEIMHAMWKPKFKAIYLLATIYVLT TLTLP  
SASAVYWFAGDKLLTHSNALSLLPKTGFRDTAVILMLIHQFITFGFASTPLYFVWEKLVHETKSMFKR  
AMARLPVVVPIWFLAIIFFPFGPINS AVGSLLVSFTVYIIPALAHMLTFAPAPSRENAVERPPRVVGGWM  
GTYCINIFVVVVVVFVVGFGFGGWASMVNFVRQIDTFGLFTKCYQCPHKKP-

>AtLAX2\_At2G21050

MENGEKAAETVVVGNVEMEKDGGKALDIKSKLSDMFHWGGSAWDVWFSCASNQVAQVLLTLPYSFSQLGM  
LSQLGMLSGIVLQIFYGLLGSWTAYLISVLYVEYRTRKEREKVNFRNHVIQWFEVLDGLLGHWRNVGLAFNCTFL  
LFGSVIQLIACASNIYYINDNLDKRTWTYIFGACCATTVFIPSFHNYRIWSFLGMLMTTYTAWYLTIASI  
LHGQVEGVKHSGPSKLVLYFTGATNLYTFGGHAVTVEIMHAMWKPQKFKSIYLFATLYVLTLPASASA  
VYWAFGDLLNHSNAFALLPKNLYRDFAVVLMLIHQFITFGFACTPLYFVWEKLGIMHECRSMCKRAAAR  
LPVVIPIWFLAIIFPFGPINSTVGSLLVSFTVYIIPALAHIFTRSSAARENAVEQPPRFLGRWTGAFT  
INAFIVVVVIVGFGFGGWASMINFVHQIDTFGLFTKCYQCPPVMVSPPPISHPHFNHTHGL-

>AtAUX1\_At2G38120.1

MSEGVEAIVANDNGTDQVNGNRTGKDNEEHDGSTGSNLSNFLWHGGSVWDAWFSCASNQVAQVLLTLPYS  
FSQLGMLSGIVLQIFYGLLGSWTAYLISVLYVEYRARKEKEGKSFKNHVIQWFEVLDGLLGSYWKALGLA  
FNCTFLFGSVIQLIACASNIYYINDHLDKRTWTYIFGACCATTVFIPSFHNYRIWSFLGLGMTTYTAWY  
LAIASIHGQAEGVKHSGPSKLVLYFTGATNLYTFGGHAVTVEIMHAMWKPQKFKYIYLMATLYVFTLT  
IPSAAVYVWAFGDALDHSNAFSLMPKNAWRDAAVILMLIHQFITFGFACTPLYFVWEKVIKMGHDTKSC  
LRALARLPVVIPIWFLAIIFPFGPINSAVGALLVSFTVYIIPSLAHMLTYRSASARQNAAEKPPFFMPS  
WTAMYVLNAFVVVWLVIVGFGFGGWASVTFVRQVDTFGLFAKCYQCKPAAAAAHAPVSALHHR-

>AtLAX1\_At5G01240

MSGEKQAEESIVVSGEDEVAGRKVEDSAAEEDIDGNGNGNFSMKSFLWHGGSAWDAWFSCASNQVAQVLL  
TLPYSFSQLGMLSGILLQIFYGLMGSWTAYLISVLYVEYRARMKQEAESFKNHVIQWFEVLDGLLGPY  
KAAGLAFNCTFLFGSVIQLIACASNIYYINDRLDKRTWTYIFGACCATTVFIPSFHNYRIWSFLGLGMT  
TYTAWYLTIASIFLHGQAEGVTHSGPTKLVLYFTGATNLYTFGGHAVTVEIMHAMWKPQKFKSIYLMATL  
YVFTLTLPASAVYVWAFGDQLLHNSNAFSLPKTRFRDVAVILMLIHQFITFGFACTPLYFVWEKAIGMH  
HTKSLCLRALRPLVVIPIWFLAIIFPFGPINSAVGALLVSFTVYIIPALAHMLTYRTASARRNAAEK  
PPFIPSWAGVYVINAIVVVVWLVIVGFGFGGWASMTNFIRQIDTFGLFAKCYQCKPPPIAAGAHHR-

>CgAUX1

MLPQKQAEAAIVSNFSETEHEGKDQEQPEDHSIFS VKTFLWHGGSVWDAWFSCASNQVAQVLLTLPYSFS  
QLGMLSGILLQIFYGLLGSWTAYLISVLYVEYRSRKEKENVSFKNHVIQWFEVLDGLLGPYWKAVGLAFN  
CTFLFGSVIQLIACASNIYYINDNLDKRTWTYIFGACCATTVFIPSFHNYRIWSFLGLGMTTYTAWYMA  
IAALLHGQVENVQHTAPSKLVLYFTGATNLYTFGGHAVTVEIMHAMWKPQKFKYIYLMATLYVFTLTIP  
SAASYVWAFGDQLLHNSNAFSLPRNGFRDAVILMLIHQFITFGFACTPLYFVWEKVIKMGHDTKSC  
ALARLPVVIPIWFLAIIFPFGPINSAVGALLVSFTVYIIPALAHMLTYRKASARQNAAEKPPFFLPSWT  
AMFVINAIVVVVWLVIVGFGFGGWASMTNFVRQVDTFGLFAKCYQCKPPPIAAGAHHR-

>CgLAX3

MASEKVETVVAGNCVEMEREEGDPKTAKSLSRLFWHGGSVYDAWFSCASNQVAQVLLTLPYSFSQLGMV  
SGIVFQLFYGLLGSWTAYLISVLYVEYRTRKEREKVDFRNHVIQWFEVLDGLLGHWRNAGLFFNCTFL  
FGSVIQLIACASNIYYINDNLDKRTWTYIFGACCATTVFIPSFHNYRIWSFLGLVMTTYTAWYLAIASI  
HGQVEGVKHSGPSKLVLYFTGATNLYTFGGHAVTVEIMHAMWKPQKFKMIYLIATLYVLTLPASAV  
YWAFGDMLLHNSNAFSLPRSGFRDVAVILMLIHQFITFGFACTPLYFVWEKFIHDTKSVFKRALARL  
PVVIPIWFLAIIFPFGPINSTVGSLLVSFTVYIIPALAHMLTFASASARENAVERPPSFLGGWTGSYSV  
NSFVVVWLVIVGFGFGGWASMLNFVRQVDTFGLFTKCYQCPPHKA

>Cva\_133952

MSDDGSGKASKLDGKPSVSSELAEVGRKASPSADFRGPDGTIATEVARAELELVDKHGVAK  
GVYSEERVPTPQSLGGKLSGWLKFLAWEGGSTFDAFFTCASAQARQRCAPDRPLSACLPLLPVLFRRSR  
TPTRPLPFPQTMVAGIILLFASLAWMTVYLMVVLVLDNKNRRIKAGTWYDNGNKRKIATQYHEAAHA  
PASPCTHCAACQVMENATYCWVGFISRVVIALGGLAVAQIIASSNFHRMIPALSKRSWALVFGGVAM  
LMSLIPSRNFRIFSFIALVATFTTAWYVAMGIIYNGDEGLQSVAWTDQTPPSLDGFFAGASNIIFTFG  
GHAMLLEVMDSMFRPFKFKVYFWSYNYVYTLVMPNSVFIYWGQVWPAQAEQYGNVYGYMPPSVARDFSI  
VLMVIHQVIVGFLFAFPYIMVEKLFKVTGAYWKRLACRPVGLLLWLIALAFPPFGVINDLLGAFTTT  
FEARCTFIIPCLAYNIHYQLKNAQAQRLESTKPPSRGGGMGMGPGTGWGTWLLPRPWVIVFIAIFGF  
GLGGYASIKVRLCRQRQ

>Cva\_52339

MSDDGSGKASKLDGKPSVSSELAEVGRKASPSADFRGPDGTIATEVARAELELVDKHGVAK  
GVYSEERVPTPQSLGGKLSGWLKFLAWEGGSTFDAFFTCASAQARQRCAPDRPLSACLPLLPVLFRRSR  
TPTRPLPFPQTMVAGIILLFASLAWMTVYLMVVLVLDNKNRRIKAGTWYDNGNKRKIATQYHEAAHA  
PASPCTHCAACQVMENATYCWVGFISRVVIALGGLAVAQIIASSNFHRMIPALSKRSWALVFGGVAM  
LMSLIPSRNFRIFSFIALVATFTTAWYVAMGIIYNGDEGLQSVAWTDQTPPSLDGFFAGASNIIFTFG  
GHAMLLEVMDSMFRPFKFKVYFWSYNYVYTLVMPNSVFIYWGQVWPAQAEQYGNVYGYMPPSVARDFSI  
VLMVIHQVIVGFLFAFPYIMVEKLFKVTGAYWKRLACRPVGLLLWLIALAFPPFGVINDLLGAFTTT  
FEARCTFIIPCLAYNIHYQLKNAQAQRLESTKPPSRGGGMGMGPGTGWGTWLLPRPWVIVFIAIFGF  
GLGGYASIKVRLCRQRQ\*

>Cvu\_102119

MTGAAQGSNEKSVNGATRITNFGVSNNGKVIDSIDGKAGFNPSLERNKQLASPTEAFLTVAAAQIGQI  
MLTLPLNAISKTGLSAGIVVSMVTAFLSLWTMYLSALYQERKRDVIACAGDMYIDKSYSKRTYELIFG  
SVLMLFAFVPTFRHFRVLNVIALFGTSFTALFILVEAGKKGIQGAALTKPVSQAQAFLLGTSVQMAMGA  
HGIALEMHDAMQDSSRYVAAVYFGGWITWILLTMPHSIAVNLAWPKLITNDNVYGVPLPSNAMRLSVWLM  
IIHQVAFALYVTPLLYMIKVLVIFLGVAFPFGYGTINSLMGAI SVPTTSFVLPAAVAFNWWYRTEARR  
NSSALPPYSPFNKFGWKVAFALNYFIMVYAAFTVGGIFFSIQRIVQSQSYTFGVFAECYQCPKLANGGNH  
YG\*

>Cvu\_33242

QIGQVMLAMPHAVSLCGMRVAIPMMVLYSLGSIWTHLLTTLYLELKQRKQRATQYFNVVGELTGSSIVK  
VFVTVIIISLLCTGIAQIVAIATGSYYLNTSIDKRTWTLIWGGILSVTMSLVPNFRHFRLNIIISLVGT  
AYTAVYLIATAASTGLPQASYALTAGPLKAQNVFLGANVFMMSGFGGHSMSFEVIDALFNPFCYDTPVYPYS  
YLFTWFVTIPHSLLAQLAFPADNAKYSNIYGAVPNNAAARNASIVLMIHQAVAYALYVTPVFFMWEKLVG  
THDKPLWIRLPSRLPVALLVWFFALIFPFFDTINAVQGAVGYSFTA FVFPTAA YLVVYKSAKARNNA PKV  
PRFIGGWTAAMLLNTVMLLWFTIFGVGFGTWAAIKNLVDQVNNLGVFASCYQCSSLATNVIKG\*

>Cvu\_44422

MLTLPHAVSLTGVRAGIPLIICYTLISMWTVHLLNALYLEYKVKRWFADDGKTKRKSSQYFEVMGGTCGK  
WLQWFTLALTVLNLMGNGTAQIVAGAANTYFINPVLTKRGWTLVWVWALSLLMTLIPTFRDFRLLNVIAIA  
GTGFTA VYIWIIECHYHGFTPGAANLAPYNIQSFFTGANVFLWAYGGHGVSEIIDAMWAPSKYDLVYPLS  
YLFTFTAAPHSMVLQAFPTENLAQDNVYGVLPKNGWLVASVIIMLIHQIVAYALYVTPVFFMWEKLVG  
THEKPNWIRLPSRLPVALLVWFFAIAFPFYGLINSIIGALTGSMVSFILPCFAYNL YMTSKQRRLAAPK  
QPPRWGTGGWGPVLVNVNSLFIYVYFVFGFCIGGWASIKTLVDKIHVLGIFVDCYQCKK\*

>Cvu1\_72534

MGSSTAQA GAEPDRKASNTVEPKLLIEKPATLSGKISGPPRNQWLHHA KALFTEGHTAWDCLLSVACAQ  
IGQVMLTMPHSMALLGIKEGIVVTLVSATAGLWMTMFLVSLYLEMKARQIKAGQWYDASGHRRTVQYHE  
VMGYWGGPVLKFYALVWGGVLMVFTFVPSFRHFRVINIIALVGTAYTAWPHKNAQDFVGA AVLGEFGHP  
IALEMADNIYSVLPYSIWKVISVWLMNIHQVAFSLYVVP LFMWEKLLRVHVKPWIYIRLPLRPLVSLAL  
YLIGVAFPFYGTINSLYKALAEPLTAFVFPVCAVYSWVYRTPSARNGAVLKPWKFLRKANWLLI WALNISI  
IIVWLFQGFVGFYFSSKLHNNIRSFVFAECYQCKAPAPKLHAPALAPHAGHNFTAGAHLPAPAPYS  
VASSPFSSPLG\*

>Cvu1\_83476

MTSKRVAEENVARTTPKESLDSFSQSLQVDKASAQNPTENGKAGKGHARMGCMQLIKLCTEGHTAWDCL  
LTVACAQIGQVMLVMPHSMALLGIKVGIVVALVA AIGGLWMTMFLASLFLEMKTRLIKSGGWYDASGKRK  
QVTQYHEVMGFHAGPTMKYVSQVAVHLVGTCTAQIVACAGNNYSITMTHDKRFYTLVWGA VLMCFSFV  
PTFRHFRIINIVALIGTCYTEWFLVAVSAQKGITPGAIDRSYRNAQDFFIGAAVLGQFGHSIALEMADAM  
RNAHFHQAA YTAGWLWVLTLLIPHSIAANLAWPDEVVEQDNIFNVIPNSPGKYLSVWLMNIHQVVAFLY  
SVPLMFMWEKLRVHVKPWIYIRLPLRPLISGLLYVISIAFPFYGTINSLYSSEPLTAFVFPVCAVYIYW  
YHTRAAREQAAMKPFKCLRVWNWSPVFALNVGILVWTVAQFGFGTYFSIRRMIQNVNTFGV FASCYQCK  
APKFAVSPALVTNSTYRLY\*

>Pp1\_1\_144031

MEEQNQRLESLEQEGPHDVSMGKMKRLLWHGGSVWDAWFSAASNQVAQVLLTLPYSFAQLGYASGVAFQL  
FYGVVGCWSCYMITWLYVEYRTRKEREKVIFKNHVIQWFEVLDGLLGRNWKILGLVFNCTFLLFGAVIQL  
IACASNIFLINDHLNKREWYIFGACMLT VLVPSFRNYRLWSFFGLMISYTA WYMTIAALAHGQVANV  
VHTAPTCKVLYFTGATNILYTFGGHAVTVEIMHAMYPVKFKYVYVLA TLYVFTLTIPSAVAVYWAFGDD  
LLRHSNALSLLYFTGATNILDVAVLMLIHQFITVGFVAVTPLYFVWEKVIHNTKSLPLRAVCRMPVILPVW  
FFAIAFPFFGPINSTVGALLVTFTVYIIPCVAHMVYRGATARQNAVEKPPFLPSWTGVYLNIFIVVW  
IIVIGVGGWASVTNFIQQIDTFGIFAPCYQCPPRAPVAATPPKLHD\*

>Pp1\_1\_148519

MEEQNERLESEIFNIPDPSVKGRVNGFLFYGGSVYDVWFSACSNQIAQVLLTLPYSFAQLGYPSGVALQL  
FYGIVGCWATYMITWLYMEYRSRMEREGHTFKIHIIQWFEVLDGLLGRKWKFLGLGFNCVYLLFSAITQL  
IACASNIFLINDHLNKREWYIFGACCLVTIFIPFRNYRLWSFFGVVTTITYTSWYMTVAALFYGQAPGA  
THDGNLSLLYFTGATNILYTFGSHAVTVEIMHAMYPVKFKYVYVLA TLYYIFLTIPSSMAVYWAFGDS  
LLVNANALALLPKSAARDVAVLMLIHQFITVGFVAVTPLYFVWEKILGVHQTTNMLLRATCRVPVILPIW  
FFAIAFPFFGLINSVGGCLLVTFVYIIPCLAHIVYFSNSLRAPSVEKPPFLPTWTA VYVNVIFIVW  
IVAVGVGGWASVSVFIKQVQTFGVFAKCYQCPPEAS\*

>Pp1\_1\_186135

MKRLLWHGGSVWDAWFSAASNQVAQVLLTLPYSFAQLGFASGIAFQFFYGVIGCWSCYMITWLYVEYRTR  
KEREKVIFKNHVIQWFEVLDGLLGRNWKIVGLVFNCTFLLFGAVIQLIACASNIFLINDHLNKREWYIF  
GACMLT VLVPSFRNYRLWSFFGLMISYTA WYMTIAALAHGQVANV VHSAPTCKVLYFTGATNILYTFG  
GHAVTVEIMHAMYPVKFKYVYVLA TLYVFTLTIPSAVAVYWAFGDDLLKHSNALSLLPRTMARDVAVL  
MLIHQFITVGFVAVTPLYFVWEKVIHNTKSLLRVSRMPVILPVWFFAIAFPFFGPINSTVGALLVTF  
TVYIIPCVAHMVYRAATARQNAVEKPPFMPSVWVYLVNIFIVWIIIVIGVGGWASVTNFIQQIDT  
FGVFAPCYQCPPRAPVAATPPKLHA\*

>Pp1\_1\_60053

MELQNQRLESDRNIPDPSMKGKINRLLWHGGSVGDAWFSASNQVAQVLLTLPYSFAQLGYGSGVAFQVF  
YGVIGCWACYMISWLYMEYRIRKEREHNFKNHIIQWFEVLDGLLGSRWKVWGLTFNCTYCLFGAVIQLI  
ACASNIFLINDHLNKREWYIFGAVSMLTIFIPSFKNYRIWSFFGLMITYTA WYMTIASIYGGTSGVT  
HNGPVSRLVLYFTGATNILYTFGSHAVTVEIMHAMYPKPKFYVFLATLYVFTLTIPSAVAVYWAFGDTL  
LTHANALSLLPRSAARDVAVLMLIHQFITVGFVAVTPLYIMWEKMLGVHRSRAWVVRALCRAPVMVPIW  
FFAIAFPFFGPINSMVGALLVTFTVYIIPCVAHMVYRASAASRQSSVEKPPRFLPSWTA VYGGNIVLCVW  
ILVVLGFGGGWASVTNFIKQIETFGIFAECYQCPVKS VHSVANVSYHT\*

>Sm1\_112710

MGLQSLVALATHTGENNSYTEVEKDRQE QDGLVDNSMRALAKLLWHGGSVYDAWFSCASNQVAQVLLTL  
PYSFSQLGIVGWVTFQVYFGLLSWTA YLISCLYVEYRARKKENVFNKNHVIQWFEVLDGLLGPYWKAA

GFTFNCTFLFLFGSVIQLIACGSNIYYISDRFDKRTWTIIFGACCMTTVLVPSFHNYRIWSFLGLGMMTTYT  
AWYMTITALVHGKDPGVKHSAPNNLVQYFTGATNILYTFGGHAVTVEIMHAMWKPSKFKSVYLFSTLYVL  
TLTIPSAATAVYVAFGDELLHNGNALALLPKNVFRDLAVVLMMLLHQFITFGFACTPLYFVWEKIIGVHRSP  
RFLLRAAARIPVVIPIWFMAVIFPPFFGPINSAVGSLLVTFTVYIIPCLAHMLTFRTAFARENAVEKPPFI  
MPSWAAVYVFNFFVVVVVVFVVGVGFGGWASTVNFVHQIKTFGIFAKCYQCPNNSHRH\*

>Sm1\_165624

MGLQSLVALATHTGENNSYTEVEKDRQEQDGLVDNSMRALAKKFLWHGGSVYDAWFSCASNQVAQVLLTL  
PYSFSQLGIVGVVTFQVYFGLLGSWTAYLISCLYVEYRARKEKENVNFKNHVIQWFEVLDGLLGPYWKAA  
GFTFNCTFLFLFGSVIQLIACGSNIYYISDRFDKRTWTIIFGACCMTTVLVPSFHNYRIWSFLGLGMMTTYT  
AWYMTITALVHGKDPGVKHSAPNNLVQYFTGATNILYTFGGHAVTVEIMHAMWKPSKFKSVYLFSTLYVL  
TLTIPSAATAVYVAFGDELLHNGNALALLPKNVFRDLAVVLMMLLHQFITFGFACTPLYFVWEKIIGVHRSP  
RFLLRAAARIPVVIPIWFMAVIFPPFFGPINSAVGSLLVTFTVYIIPCLAHMLTFRTAFARENAVEKPPFI  
MPSWAAVYVFNFFVVVVVVFVVGVGFGGWASTVNFVHQIKTFGIFAKCYQCPNNSHRH\*

>Sm1\_176094

MVVEGKEEMVGNYTEMELDRKEQDGLVENNQNRVQGIKALFWHGGSVYDAWFSCASNQVAQVLLTL  
SQLGFASGIVFQIFYGLLGAWTAYLISWLYVEYRNRKEKENVSFKNHIIQWFEVLDGLLGPYWKAAIGFGF  
NCTFLFLFGSVIQLIACASNIIYINDSLSKRTWTYIFGACCMTTVLIPSFHNYRVWSFLGLGMMTTYTAWYM  
TIAAIVHGQADNVKHTGASKLVL YFTGATNILYTFGGHAVTVEIMHAMWKPKFKWVYL VATIYVFTLTL  
PSATAVYVAFGDNLLTKSNALALLPKNAFRDIAVFITFGFACTPLYIVWEKILGIHKTANLPRALARVP  
VVLPIWFLAIIFFPPFFGPINSAVGALLVTFTVYIIPSLAHMITYRTAFARANSVEKPPFFLPSWTLVYLVN  
FIVVWIAVIGVGFGGWASVTNFVHQIDTFGLFAKCYQCPNKTGPPKH\*

>Sm1\_439204

MVVEGKEEMVGNYTEMELDRKEQDGLVENNQNRVQGIKALFWHGGSVYDAWFSCASNQVAQVLLTL  
SQLGFASGIVFQIFYGLLGAWTAYLISWLYVEYRNRKEKENVSFKNHIIQWFEVLDGLLGPYWKAAIGFGF  
NCTFLFLFGSVIQLIACASNIIYINDSLSKRTWTYIFGACCMTTVLIPSFHNYRVWSFLGLGMMTTYTAWYM  
TIAAIVHGQADNVKHTGASKLVL YFTGATNILYTFGGHAVTVEIMHAMWKPKFKWVYL VATIYVFTLTL  
PSATAVYVAFGDNLLTKSNALALLPKNAFRDIAVFITFGFACTPLYIVWEKILGIHKTANLPRALARVP  
VVLPIWFLAIIFFPPFFGPINSAVGALLVTFTVYIIPSLAHMITYRTAFARANSVEKPPFFLPSWTLVYLVN  
FIVVWIAVIGVGFGGWASVTNFVHQIDTFGLFAKCYQCPNKTGPPKH\*

## AUX/IAAs

>Co\_c11109\_c\_s\_1

SLGYTTXSRXNHQLFGDVHGSSSPKPGNSSTSSSVSGSASMSATPSMSATPRRSLSTVCV  
PHVVVVVDGHPGCVVVTIHPSSDYLRFYTSIREALTGALRTPEKIPQHPPDSPQNVIP  
GGIIAYEDEDGDLVLDIPWRLFFQRVKRIRVVIQEPG-EEGS-TSPRHGREATEGRKI  
--SRGSRFLQHEDALDHNLYDMS-VSTPTQRYCDHLLRNFKQKPNIPPPFKWETHPTCT  
RRDEPRPMDSGRRLL

>AtIAA10\_At1G04100

MNGLQEVCSSSGSVMIPLPAEEDENA AHSSSEDSSCPDES VSETELDLALGLSIGRRKVRSSLSSSSSSLT  
RESGTRKRSADSPAAASNATRQVA VGWPPLRTYRINSLVNQAKSLATEGLSSGIQKETTksVVA AKND  
ACFIKSSRTSMLVKVTMDGVIGRKYVDLNDLSYAALEKTLDLMFFQIPSPVTRSNQGYKTIKETCTSKL  
LDGSSEYIITYQDKDGDWMLVGDVWPQMFLSVTRLRIMKTSIGAGVGK\*

>AtSHY2\_At1G04240

MDEFVNLKETELRLGLPGTDNVCEAKERVSCCNNNKRVLSTDTEKEIESSSRKTETSPPRKAQIVGWPP  
VRSYRKNNIQKKNESEHEGQGIYVKVSMGDGAPYLKIDLSYKGYSELLKALEVMFKFSVGEYFERDGYK  
GSDVFPTYEDKGDWMLIGDPWEMFICTCKRLRIMKGSSEAKGLGCGV\*

>AtAXR3\_At1G04250

MMGSVELNLRTELCLGLPGGDTVAPVTGNKRGFSETVDLKLNNNEPANKEGSTTHDVTDFDSKEKSAC  
PKDPAKPPAKQVVGWPPVRSYRKNVMVSCQKSSGGPEAAAFVKVSMGDGAPYLKIDLRMYKSYDELSNAL  
SNMFSSFTMGKHGGGEGMIDMNERKLM DLVNSWDYVPSYEDKGDWMLVGDVWPWPMFVDTCKRLRLMKGS  
DAIGLAPRAMEKCKSRA\*

>AtIAA12\_At1G04550

MRGVSELEVGKSNLPAESELELGLGLSLGGAWKERGRILTA KDFPSVSGSKRSAESSHQGASPPRSSQV  
VGWPPIGLHRNSLVNNQAMKAARAEEDGGEKVVKNDELKDVSMKVNPKVQGLGFVKVNMDGVGIGRKYD  
MRAHSSYENLAQTLEEMFFGTGLYCFQMRTL\*

>AtIAA34\_At1G15050

MYCSDPPHPLHLVASDKQKQDHLKILSWKKPTMDSPLGVFPNSPKYHPYYSQTTEFGGVIDLGLSLRTI  
QHEIYHSSGQYCSNEGYYRRKWKGYVKVTMDGLVGRKVCVLDHGSYSTLAHQLEDMFGMQSVSGLRLFQME  
SEFCLVYRDEEGLWRNAGDVWNEFIESVERLRITRRNDAVLPF\*

>AtIAA5\_At1G15580

MANESNNLGLTELRLGLPGDIVVSGESISGKKRASPEVEIDLKCEPAKKSQVVGWPPVCSYRRKNSLE  
RTKSSYVKVSDGAFLRKIDLEMYKYQDLASALQILFGCYINFDDTLKESECVPIYEDKGDWMLAGDV  
PWEMFLGSCKRLRIMKRSCNG\*

>AtIAA18\_At1G51950

MEGYSRNGEISPKLLDL MIPQERRNWFHDEKNSVFKTEEKLELKL GPPGEEDDDESMIRHMKKEPKDKS  
ILSLAGKYFSSSTKTTSHKRTAPGPVVGWPPVRSFRKNLASGSSSKL GNDSTTSNGVTLKNQKCDAAAKT  
TEPKRQGGMFVKINMYGVPIRKVDLSAHNSYEQLSFTVDKLF RGLLAAQRDFPSSIEDEKPTGLLDGNG  
EYTLTYEDNEGDKMLVGDVPWQMFVSSVKRRRVIKTSEISSALTYGNGKQEKMR\*

>AtIAA6\_At1G52830

MAKEGLALEITELRLGLPGDNYSEISVCGSSKKKRVLSDDMTSSALDTENENS VVSSVEDESLPVVKSQ  
AVGWPPVCSYRKKNNEEASKAIGYVVKVSMGDGVPYMRKIDLGSSNSYNLVTVLENLFGCLGIGVAKEGKK  
CEYIIYEDKDRDWMLVGDVWQMFKESCKRLRIVKRSDATGFGLQD\*

>AtIAA15\_At1G80390

MSPEEYVRVWPDSGDLGGTELTLALPGTPTNASEGPKKFGNKRFFLETVDLKLGEAHENNYISSMVTNDQ  
LVGWPPVATAKTVRRKYVVKVALDGAAVLRKVDLGMVDCYQGLFALENMFQGIITICRVTELERKGEFVA  
TYEDKDGDLMLVGDVPWMMFESCKRMRLMKTGDAIGL\*

>AtIAA32\_At2G01200

MDPNTPADFFKGSKFHTYYSQTKKGGGVIDLGLSLRTIQHETYLPARMIGLDGYGELIDWSQPSYNSI  
TQLKSEDTGHRLAQGYNNEGSRGKYAYVKVNL DGLVVGGRKVDLVDQGAATLALQLNDMFGMQTVSGL  
RLFQTESEFSLVYRDREGIWNVGDVPWKEFVESVDRMRIAARRNDALLPF\*

>AtIAA8\_At2G22670

MSYRLLSVDKDELVTSPCLKERNYLGLSDCSSVDSSTIPNVV GKSNLNFKATELRLGLPESQSPERETDF  
GLLSPRTPDELLFPLLPKDNNGSATTGHKNVVS GNRKGFADTWDEFSGVKGSVRPGGGINMMLSPKVKDV  
SKSIQEERSHAKGGLNNAKAKQVVGWPPIRS YRKNMTMASSTSKNTDEVDGKPLGVLFVKVSM DGAPYL  
RKVDLRTYTSYQQLSSALEKMFSCFTLQCLHGAQGRERMSEIKLKDLLHGEFVLTIEDKDGDWMLVGD  
VPWEIFTETCQKLIKMGSDSIGLAPGAVEKSKNKERV\*

>AtIAA13\_At2G33310

MITHEMKGGESELELGLSLGGGTA AKIGKSGGGGAWGERGRLLTAKDFPSVGSKRAADSASHAGSSP  
PRSSQVVGWPIGSHRMNSLVNNQATKSAREEEEEAGKKVKDDEPKDVTKKVNGKVQVGFIVNMDGVAIG  
RKVDLNAHSSYENLAQTLDEFRTNPGTVGLTSQFTKPLRLLDGSEFVLTIEDKEDGDMMLVGDVPWRMF  
INSVKRLRVMKTSEANGLAARNQEPNERQRQP\*

>AtIAA20\_At2G46990

MGRGRSSSSSISSSKSNPFGASSSTRNLSTDLRLGLSFGTSSGTQYFNGGYYGYSVAAPAVEDAEYVAA  
VEEEENECNVGSFYVKNMEGVPIGRKIDMLSLNGYRDLIRTLDFMNASILWAEEDMCNEKSHVLT  
ADKEGDWMMVGDVPWEMFLSVRRLKISRANYHY\*

>AtIAA16\_At3G04730

MINFEATELRLGLPGGNHGGEMAGKNNGKRGFSETVDLKLNLSTAMDSVSKVDLENMKEKVVKPPAKAQ  
VVGWPPVRSFKNVMSGQKPTTGDATEGNDKTS GSSGATSSASACATVA YVKVSM DGAPYLRKIDKLK YKT  
YQDLNALS KMFSSFTIGNYPQGMKDFMNESKLIDLNGSDYVPTYEDKDGDMMLVGDVPWEMFVDSCKR  
IRIMKGSEAIGLAPRALEKCKNRS\*

>AtIAA19\_At3G15540

MEKEGLGLEITELRLGLPGRDVAEKMMKRAFTEMNMTSSGNSDQCESGVVSSGGDAEKVNDSPAASKSQ  
VVGWPPVCSYKKNCKEASTTKVGLGYVVKVSM DGVPYLRKMDLGSSQGYDDLAFALDKLFGFRGIGVALK  
DGDNCEYVTIYEDKDGDMMLVGDVPWGMFLESCKRLRIMKRSDATGFGLQPRGVDE\*

>AtPAP1\_At3G16500

MEGCPNRNREIGPKLLDLIPQGRKWKYQEDKNNTDQEKKLELRLGPPGGDEEDHSAIKKKNTEIRNIKKETE  
DKSFHCFNGFNFSNKTTSVPHISQKRTAPGPVVGWPPVRSFRKNLASTSSSKLGNESHHGGQINKSDDG  
EKQVETKKEGMFVKINMDGVIGRKVDLNA YNSYEQLSFVVDKLF RGLLAAQRDISDQGEGEKPIIGLLDG  
KGEFTLYEDNEGDKMLVGDVPWQMFVSSVRLRVIKSSSEISSALTFGCSKQEKMMH\*

>AtIAA31\_At3G17600

MEVSNCSFSSSSVDSTKPSSESVNLSLSTFPSTSPQREARQDWPPIKSRLRDTLKGRLLRRGDD  
TSLFVKVYMEVPIGRKLDLCVFSGYESLLENLSHMFDTSIICGNRDRKHVLTIEDKDGDMMLVGDIPWD  
MFLVTRRLKTRPERY\*

>AtIAA2\_At3G23030

MAYEKVNELNLKDTLCLGLPGRTEKIKEEQEVSCVKSNNKRLFEETRDEEESTPPTKTQIVGWPPVRS  
RKNNSVSYVVSMDGAPYLRKIDLKTYKNYPELLKALENMFVKMIGEY CEREYKGS GFVPTYEDKDGDM  
MLVGDVPWDMFSSCKRLRIKGS DAPALDSSL\*

>AtIAA7\_At3G23050

MIGQLMNLKATELRLGLPGGAEAVESPAKSAVGSKRGFSETVDLMLNLQSNKEGSVDLKNVSA VPKEKTT  
LKDPSKPPAKQVVGWPPVRYRKNMMTQKQTSSGAEASSEKAGNFGGGAAGAGLVKVSMDGAPYLRKVD  
LKMYKSYQDLSDALAKMFSS TMGN YG AQGMIDFMNESKLMNLLNSSEYVPSYEDKDGDMMLVGDVPWEMF  
VESCKRLRIMKGSEAVGLAPRAMEKYCKNR\*

>AtIAA30\_At3G62100

MGRGRSSSSSISSCKSNPFGVSSNTRNLSTDLRLGLSFGSSGQY YNGGDNHEYDGVGAAEEMMIME  
EEEQNECNSVSYVKNMEGVPIGRKIDLLSLNGYHDLITLDYMFNASILWAEEDMCSEKSHVLT  
ADKEGDWMMVGDVPWEMFLSSVRLKISRANYHY\*



>AtIAA14\_At4G14550  
MNLKETELCLGLPGGTETVESPAKSGVGNKRGFSETVDLKLNLQSNKQGHVDLNTNGAPKEKTFKLDPSK  
PPAKAQVVGWVVRNRYRKNVMANQKSGEAEEMSSGGGTAVFVKVSMGAPYLRKVDLKMYSYKDLSDAL  
AKMFSSFTMGSYGAQGMIDFNESKVMDDLNSSEYVPSYEDKGDWMLVGDVPWPMFVESCRLRIMKGSE  
AIGLAPRAMEKFKNRS\*

>AtIAA1\_At4G14560  
MEVTNGLNLDTELRLGLPGAQEEQLELSCVRSNNKRKNNDSTEESEAPPKQIVGWPPVRSNRKNNN  
NKNVSYVKVSDGAPYLRKIDLKMYKNYPELLKALENMFKFTVGEYSEREGYKGSFVPTYEDKGDWMLV  
GDVPWDMFSSSQKLRIMKGEAPTAL\*

>AtIAA11\_At4G28640  
MEGGSASGSASALNDENLVVSCEDSSSPIGNELELGLTSLGRKGYRDCRVYADSSSSSSSSSLSRAS  
VIAGIKRTADMAATSGQVVGWPPIRTYRMSNMVNQAKASATEDPNLEISQAVNKNRSDSTKMRNSMFVKV  
TMDGPIGRKIDLNAHKCYELSNLLEEMFLKPKLGSRTLETDPGHMETPVKILPDGSSGLVLTIEDKEGDW  
MLVGDVPWGMFIGSVRRLRIMKTSEATGKAMIL\*

>AtPAP2\_At4G29080  
MSVSVAEHDYIGLSEFPTMEATTMSDKTKTRDNNGLNFKATELRLGLPGESEPERVDSRFLALNKSSC  
PVSGAKRVFSAINDSNKWFVSPGTTATGDVGSAGSPRTSVVKDGKSTFTKPAVPVKEKSSATAPASK  
AQVVGWPPIRSFRRKNSMASSSQKPGNNSETEAEAKSGPEQPCLYVKVSMGAPYLRKIDLKTYKSYLEL  
SSALEKMFSCFTIGQFGSHGGCRDGLNESLTDLLRGSEYVVTYEDKDSWMLVGDVPWEMFICSCKKLR  
IMKSSEAIGLAPRVMEKCRSRN\*

>AtIAA29\_At4G32280  
MELDLGLSLSPHKSSKLGFNFDLNKHCAIEGAASCLGTEKLRFEATFGLGNVEENCYMPKQRLFALNGQP  
NEEDEDPLESSSIVYDDEEENSEVVGWPPVKTCMIKYGSYHHRHRNHHHCPYHHRGRITAMNNNISNP  
TTATVGSSSSSSSSRSSMYKVKMDGVAIARKVDIKLFNSYESLTNSLITMFEYEDCDREDTNYTFTFQ  
KKEGDWLLRGDVTWKIFAESVHRISIRDRCAYTRCLF\*

>AtIAA29\_At5G25890  
MEEKRLRLAPLAPCHQFTSNNNINGSKQKSSTKETSFLSNNRVEVAPVVGWPPVRSRRNLTAQLKEEM  
KKKESDEEKEYVKINMEGVPIGRKVNLSAYNNYQQLSHAVDQLFSKKDSWDLNRQYTLVYEDTEGDVVLV  
GDVPWEMFVSTVKRLHVLKTHAFSLSPRKHGKE\*

>AtIAA9\_At5G65670  
MSPEEELQSNVSVASSSPTSNCSRNTLGGLEKHNLYGLSDCSSVGSSTLPLAEDDKATISLKADELTL  
GLPGSQSPARTELNLLSPAKLDEKPFPLPSKDEICSSSQKNNASGNKRGFSDTMDQFAEAKSSVYTEK  
NWMFPEAAATQSVTKKDVQIPKQSSSTNNSSPPAAKAQIVGWPPVRSYRKNLTLATCKNSDEVGDRP  
GSGALFVKVSMGAPYLRKVDLRSYTNYGESSALEKMFVTFTLGQCGSNGAAGKDMLETKLKDLLNGKD  
YVLTIEDKGDWMLVGDVPWEMFIDVCKKLMKMGCAIGAAAPRAMEKSKMRA\*

>Pp\_164608  
MKFSGEGSSVLTGAQLKYSSDKPNMNFETVCKDAHAESSQHEESSESGTTLKEHDYFGLSEVSSSNSSGDKQPEKGCSSR  
ELNLESATALQLGPPAGLKPTGQSDVLAEEEEAGPENPAKRPAHYHLQQNSTVDVKKPVAEAVSTKNQRKIIIEFRAK  
KAQDAKAMQSMQHNVRASYPGAQSVFPGAKNNGVKRGFSEAVGTNFNASSGAGGAVREGNCDMNRGEGVGGTEQP  
ESKVNHLHSMGMSRMAPGSGGQNGSAWRNINLEKMQGPLSTIFRKSLSKITLQDAGDSSIKCSSDVINRNKAIAPASNE  
QPLAQNQTGWPPVKNFNKNNTPAPPPSAPATAACRSVPMRRGASSSSGNLVKIYMDGVFPGRKVDLKTNNSEKLYY  
TLEDMFQHYIVHGCGRSSCGDSSHSLASSRKLNFLEGESEYVLIYEDHEGDSMLVGDVPWDFIDA VKRLRIMKGSEQ  
VNLAPKNPDSMKQGA VG\*

>Pp\_219923  
MKFSNEVVHKS MNITDCSALTGALLKYSTDKNMNFETLYRDAAVESQHEVSNESGSTLKEHDYFGLSEVSSSNSSS  
GQPEKCCREELNLNESATTLQLGPPAAVKPSGHADGADAHDEGAGPENPAKRPAHHMQQESLADGRKAAAEMGSFKI  
QRKNLEEFKAMKAQAHMTKSPKPVHTMQHNMHASFSGAQMAFGGAKNNGVKRVFSEAVGGNHIAASGVGVGREG  
NDDVSRCEENGTEQLDLKVHLPKGMGMARMAPVSGGQNGSAWRNLSFDNMQGPLNPFPRKSLVSKMPVDPGGDSSA  
NASNDCANRKGMSVSPVQPPAQNQTVGWPPVKNFNKMNTPAPPASTPARACPSVQRKGASTSSSGNLVKIYMDGVFP  
FGRKVDLKTNDSYDKLSMLEDMFQYISGYCGRSSSSGESHVVAASSRKLNFLEGESEYVLIYEDHEGDSMLVGDVP  
WELFVNAVKRLRIMKGSEQNLAPKNADPTKVQAVG\*

>Pt\_171693  
SNNNNKNNNTSLNMKETELRLGLPGSQSPERKPTVPAAGVSLVGKDIDTNNNTNAYS LIPVKNLVSGAKRVFSDAIDGST  
GWVFSGGDNGNPQKSRVAGPAKQVAVQSPKPVQEKNSQVAAANENSSAPAAKTQVVGWPPIRSFRRKNTMASSLAKN  
NEDVDKSGYGYLVKVSMDGAPYLRKVDLKTNYGNYLSSALEKMFSCFTIGQCGSHGLAARDGLTESCLKDLHGSE  
YVLTIEDKGDWMLVGDVPWDMFTDSCRRLRIMKGSEAIGLAPRAMEKCKNRN

>Pt\_180980  
KNEKKRVFSELSGEANSTTDGRKTQTTQVVGWPPVCSYRKKNSFNEKDSHETSKIYVKVSMGAPFLRKVDLGMHK  
EYSLVVALEKLFQCFGIGKALKDIDDCEYVPIYEDKGDWMLVGDVPWEMFIESCKRLRIMKRSEAKGFGQLQPRGALQ  
Q

>Pt\_180995

KNEKKRVFSELSGEANSTTDGRKTQTTSQVVGWPPVCSYRKKNFNEKDSHETSKIYVKVSMGAPFLRKVDLGMHK  
EYSLVVVALEKLFQCFGIGKALKDTHDDCEYVPIYEDKDGWMLVGDVPWEMFIESCKRLRIMKRSEAKGFGLQPRGALQ  
Q

>Pt\_205684

MRFEETELRGLPLGNGGGGTEGGEFARKRGFSETVDLKLNLSSKEGGIDPNHEKTQREKNLLATDPAKPPAKAQQVVGW  
PPRSFRKNMLAVQKSSDQESTDKVPGGNATFVKVSMGAPYLRKVDLKMFKYHELSDALGKMFSSFTIGNCGSHG  
MKDFLESKLIDLNGTDYVPTYEDKDGWMLVGDVPWDMFVESCRLRIMKGTATGLAPRAMEKCKNRS

>Os\_IBCD000527

MSVETERSSSTESSAASGLDFEDTALTLRPLGSLAAAAAPDPDRKRSSPSSDAADAADNSSPLAAAADAPPAPKARVVG  
WPVRSFRKNALAAKFVKVAVDGAPYLRKVDLEAYSGYDQLLRALQDKFFSHFTIPIDGRKVAGKFADDERKLVDAVN  
GTEYPTYEDKDGWMLVGDVPWK

>Os\_IBCD000591

MAWRRGFGEEDGAAAAGESGLELCLGLPAYFSSSSSKPSEGSTAAPAFALRSNGTNASKPRAAAAAPVVGWPPVRSF  
RRLASSSSSSKQAPPPSSPQNGDKASKDGGAEKGMFVKINMDGVPIGRKVDLTA YGGYAQLSAAVDKLFRLGLLAA  
QSAADGEADAAAAGEMVGGGEYTLVYEDDEGDRMLVGDVPWQMFIA TAKRLRVLKSSDLPPSLMRAAGSRKRAA  
ADS

>Os\_IBCD000843

MSPPLELDYIGLSPPPSSSSAAAAARADDVDLKGTELRLGLPGSESPDRHPAAIAAAAATATTLELLPAKGAKRVPD  
AALTPTAAAGKGAAREGEEVGAEEEDKVAAPPQAAKAQVVGWPPVRSYRKNMATNQIKSNKEDVDAKQGGQ  
FLYVSMGAPYLRKVDLKYKYNKMSLGLEKMFIFSTGKEGAENQDGEYVLTIEDKDGWMLVGDVPWEMF  
TDCRRLRIKGSDAIGLGSQRLRVLFPVKL

>Os\_IBCD001221

MEECKGGMSPPSSMDSSTHPALSTTSSAATARRDLSTDLRLGLSLSTSSSSLLQAAAAAAAADDSIPSTPRNSQVHAD  
PPIKFLRSALQKASAAAGGGGARRRRTLVKVMYMEGVPIGRKLDLDDGYDSLILKCHMFKTPITYADVMECHQVVP  
GKAAHVLTIEDQDGDWMMTLPEQRKEAQDCKDG

>AtIAA33\_At5G57420

MNSFEPQSDSLQRRFHQDNSTTQQPRDTPFPFKPASKNHNNSNSSGAAGRSFQFGF  
LNVEDDLVSSVPPVTVVLEGRSICQRISLDKHGSYQSLASALRQMFVDGADSTDDLDLS  
NAIPGHILAIYEDMENDLLLAGDLTWKDFVRVAKRIRILPVKGNTRQVQRNE-

>AT3G24650

MKSLHVAANAGDLAEDCGILGGDADDTVLMGDGIDEVGREIWLDDHGGDNNHVVHGHQDDDL  
IVHHDPISIFYGDLPTLPDFPCMSSSSSSTSPAPVNAIVSSASSSSAASSTSSAASWAI  
LRSDGEDPTPNQNYASGNCDSSGALQSTASMEIPLDSSQGFQCGEGGGDCIDMMETFG  
YMDLLDSNEFFDTSAFSQDDDTQNPMLDQTLERQEDQVVPMMENNSGGDMQMMNSL  
EQDDDLAAVFLWLNKNETVSAEDLRKVKIKKATIESAARLGGGKEAMKQLLKLILEW  
VQTNHLQRRRTTTTTNLVSYQQSFQDQPFQNPNNNNLIPSDQTCFSPSTWVPPPPQ  
QAFVSDPFGFYMPAPNYPPQPEFLPLESPPSWPPPQSGMPHQFPMPPTSQYNQFGD  
PTGFNGYNMNPYQYPYVAPGMRDQRLRLCSSATKEARKRMARQRRLSHHHRHNNNN  
NNNNNNQNTQIGETCAAVAPQLNPVATTATGGTWMYWPVNPVAVPPQLPPVMETQLPTM  
DRAGSASAMPQQVVPDRRQGWKPEKNLRFLLQKVLKQSDVGNLGRIVLPKKEAETHLPE  
LEARDGSLAMEDIGTSRVWNMRYRFWPNKSRMYLLENTGDFVKTNGLQEGDFIVYSD  
VKCGKYLIRGVKVRQPSGQKPEAPPSSAATKRQNKSRNINNNNSPSANVVVASPTSQTVK

>AtMP\_AT1G19850

MMAASLSCVEDKMTSCLVNGGGTITTTTTQSTLLEEMKLLKQDQSGTRKPVINSELWHACAGPLVCLPQVGSVYVYFSQ  
GHEQVAVSTRRSATTQVNPYNLPSQLMCQVHNVTLHADKDSDEIYAQMSLQPVHSERDVFPVDFGMLRGSKHPTEF  
FCKTTASDSTHGGFSVPRRAAEKLFPLDYSAQPPTQELVVRDLHENTWTFRHIYRGQPKRHLLTTGWSLFGSKRLR  
AGDSVFIRDEKSQLMVGVRANRQQTALPSSVLSADSMHIGVLA AAAAHATANRTPFLIFYNPRACPAEFVIPLAKYRKA  
ICGSQLVGMRFMMFETEDSGKRRYMGTVIGISDLPLRWPGSKWRNLQVEWDEPGCNDKPTRVSPWDIETPESLFI  
SLTSLGLQLHPSYFAGETEWGSLIKRPLIRVPDSANGIMPYASFPSMASEQLMKMMMRPHNNQNVPSFMSEMQQNIVM  
GNGGLGDMMQPLMMNQKSEMVPQNKLTVNPSASNTSGEQNLSQMSAPAKPENSTLSGCSSGRVQHGLEQSM  
EQASQVTTSTVCNEKVNQLLQKPGASSPVQADQCLDITHIQYQPQSDPINGFSFLETDELTSQVSSFSLAGSYKQPFILS  
SQDSSAVVLPDSNSPLFHDVWDTQLNGLKFDQFSPLMQDLYASQNICMSNSTTNSILDPPLSNTVLDDFCAIKDITDFQ  
NHPSGCLVGNNTFAQDVQSQITSASFADSQAFSRQDFPDNSGGTGTSSSNVDFDCCSLRQNSKGSWQKIATPRVRTY  
TKVQKTGVSGRSIDSFKDYEELKSAIECMFGLLEGLLTHPQSSGWKL VYVDYESDVLVGDVDPWEEFVGCVCIRILSP  
TEVQQMSEEGMKLLNAGINDLKTSSVS\*

## ESM1

>ESM1\_AT3G14210

MADNLNLVSVLGVLLVL TIFHNPIVYAGEGVPNVALFTFGDSY YDAGNKVFLSQRKDLPTQYWPYGKSR  
DYPNGKFSGDHIVPDFIADFI SIPNGVLPPVLKPGVDISRGSFAVADASILGAPVESMTLNQQVVKFN  
MKSNWNSDYIEKSLFMIIYIGTEDYLNFTKANPNADASAQQAFVTNVINRLKNDIKLLYSLGASKFVVQLL  
APLGCPLIVRQEYKGTGNECYELNLDLAKQHNGKIGPMLNEFAKISTSPYGFQFTVDFYNAVLRRIATGR  
SLNYRFFVTNTSCCGVGTNA YGCGKGNVHSLKCEYQRSYFFFDGRHNTEKAQEEMAHLLYGADPDVVQP  
MTVRELIVYPTGETMREYWEPNLAI RRRPSRDFYLGLAAYY-

>APE2\_AT5G46110  
MESRVLLRATANVVGIPKLRPIGAIHRQFSTASSSSFSVKPIGGIGEGANLISGRQLRP  
ILLDDSSAINGGEKREILKPVKAAAAAEGGDTAGDAKVGFLAKYPWLVTGFFFFMWFYFLNV  
IFNILNKIYNYPYPYFVSVIHLFVGVVYCLISWSVGLPKRAPIDSNLLKVLIPVAVCH  
ALGHVTSNVSFAAVAVSFTHTIKALEPFFNAAASQFIMGQSIPITLWLSLAPVVLGVAMA  
SLTELSFNWLGFSAMISNISFTYRSIFSCKAMTDMSTNVYAYISIIALFVCIPPAIIV  
EGPKLLNHGFADAIAKVGMTKFISDLFWVGMFYHLYNQLATNTLERVAPLTHAVGNVLRK  
VVFVIGFSIVIFGNKISTQTGIGTGIAIAGVAMYSHKAKIEEEKRVTRKESIESS-

>Phypa1\_1\_121592\_e\_gw1.36.122.1  
MLLFCPFSSAAPANFVFGDSLVDIGNNNFLVLSLAKANLYPNGIDLGNVPTGRFCNGRTVPDIIFEKLG  
VPIPKYLNPTTRGSVILNGVNYASGAGGILDSTGSNYIQRLSFNKQLSYFQTKEDITNMIGPQRTEKL  
LNDIAIFVVFVFGSNDYINNYLLTNSATSQQYTPSKYQDLLISTFHGQLSTLHNLGARKFVVDLGLGLCLP  
SQIVRNNTVGTCLDYINDYAKNYNAALKPMLNQLTSALPGSIFCYGEVNAAIQQFITNRPNYGFVDVINAG  
CCGLGPLNGQLGCLPGANLCTNRINHLFWDFPHPTDSANAILAERFFSGGPDASIPYNIQQLVSM\*

>Phypa1\_1\_137114\_e\_gw1.135.40.1  
MDYAAVPAIEVNGIRFKEIFSGDSYLDIGNRDPKNFTRTPVGPVNQAWINPYGLTNPVPTGRFCGQV  
FSDILADYIGLHPRPYILYEERPSTRKEDGMNFVGGSGVKNLNLGFTKTRDQIAQLKTVINSGVYSETVY  
KESLIFTISGNDYVAFRLNSQVIGLAEIGIFIVAVNQLVEDLKTLYNMGFRNFVSTLPLGLPGVS  
AFTGSLSCLEVNANVSTTHNSLLKAMLTNSSSILAAANLILDNELAFREILLNQIQTFSTGLKACCKG  
SGSNLDCGVDKATRTPYTLCSANTISTYFFWDEVHPTQAGWRSVFNFLGGEPPSFTNGKSLVQFLST  
\*

>Phypa1\_1\_189874\_estExt\_gwp\_gw1.C\_1380072  
MEGNKWSLWLPASAILFQIVSVILTAVYVHGASVPALYVFGDSTVDCGTNNYINTTQAFRGNFPPYKDFD  
KNPTGRFSNGRVIVDFIVEYAGKPLIPPLEPNADLSHGAFNGSGGAGVLVETNEGHVVDLQTLRQLFH  
HKAEVTEKSGQAFAEELFSDAVYIVSIGSNLYGGYFGNPKQEQEYTPQFVRAVATSIVESIKILYSSG  
ARKIVVFDLGPMSGCLPALRDLEETRSCSAPVSAVAAAHNDAVKGALSQGLQFLPGLTIVTTNFYKFFSER  
LENPSQYGYVSVDEPCCGAGPCEGRGCVHEGHPSKPECQHCSANTYVWWDYPHPSETVHHQFAQTVWNG  
TSPYIEPVAAMLHLFKQKAEAHGNYADKLDLFDVGDPLQQLVSESMLMT\*

>Phypa1\_1\_206513\_estExt\_Genewise1.C\_340087  
MASLENQQWLVLVIGVMAITLSATGVEAQQKTPATFIFGDSLVDVGNNNYIFTLAVADHKPYGIDRA  
DKVPTGRFCNGKIIPDLVNDYLGTPYPLVLAPEATGANLLHGVNYASAGAGILEDTGSIFIGRVTISQQ  
FGYFQTKQIQLIIGQPAADELIHNAIYSFTVGGNDFVNNYMAVTTSTSRKYTPSQYQDLLINNFHGQL  
KTAYGLMRKFIVSNMGPIGCAPSVLSSKSQAGECVQEVNNYALGFNAALKPMLQSLQAEPLGSIFYAN  
AFDIVRGIADPLKYGFTEPVTACCGAGQYNGIDGSCRTIGHLCPDRTKSVFWDFAFHPTEKVNKICNDQ  
FLHGLDAISPMNVAQLLAM\*

>Selmo1\_174517\_estExt\_Genewise1Plus.C\_260019  
MQKLLALSLIVLLAAAETSIAKHRNGRGGRRGAKAIFIFGDSLVDSGNNYLNLSLAKANFAPNGEDW  
PNHGTGRFCNGRLVADYISEYMGTEPVLPLDPKNTGRNLLRGANFASAGSILDDTGAMFVQRLRVSE  
QYNLFRRYKQQLASFVGGRAADRIVAAGLYSFTIGGNDYINNYLQPLSARARQYTPPQYNTLLVSTFKQQ  
LKDLYNMGARKISVGNMGPVGCIPSQITQRGVNGQCVQNLNEYARDYNSKLPMLDELNRELRGALFVYV  
NAYDILSDLVSNPGKNGFTVNSACCGQNGYNGLFICTAFSTICNDRTKYVFWDPYHPTEKANILIAQQT  
LFGGTNVISPMNLRQLLALP\*

>Selmo1\_232422\_fgenesh1\_pm.C\_scaffold\_2600003  
MFVFGDSLVDAGNNNFINSIARANFAPNGIDFPNSAPTGRFCNGKIISDLSYDMGTPPILPVLDPQAKG  
QNLLLVNFASAGAGILDDTGTFIQRILTMDQFRLFRKYKSDLAAVAGASAAAKLISDGIYSFTVGGND  
YINNYLLLFAQRARQYTPSQFNALLIATLRNQLKTVYSLGARKVTVSNMGPIGCIPSQQLQRSSRAGECIQ  
ELNDHALSFNAALKPMIEGLNRELKGFVYVNSYDILNEYIQNPSKYGFQYTNMACCQGSYNGLLTCT  
GLSNLCSDRTKYVFWDAFHPSEINRLITNRLLNGPPSDLSFPNVKQLIAMST\*

>Selmo1\_65725\_gw1.4.1361.1  
AAARAMFVFGDSLVDAGTNVFIAGVPNAANFDPYGETFFLKPTGRFSNGKIVPDFLAGLLGLALLPPFLK  
PGSNFSQGANFASSGSEILDSTNPNPNDLIPLNAQVRQFQEFVKRRKPRELSIPASIFLLVTGSNDLLGG  
YLLNGSAQAFNPQYVDLLLGEYQKSLALHRSARKIVITIGIPLGCTPSLRLLQEITNNAATGCLEES  
NELALAFNTKLAQLFQELTKNLTDAKILVKPYDFLDMINNGTKYGFEEQKNCCGGGAYNAMIPCGRD  
APFLCHVPSKYLFWDFHPTHQAARFISDQVWGGAPAFVEPLNLRAL

>Selmo1\_73430\_e\_gw1.0.1307.1  
MEQRGVPKFQLFLAFVLSNAACLLHAANVPALFIFGDSLIDVGNNNYINSLAKADVRYNGIDYNHGVPTG  
RFCNGRTIPDFLGEYLEVPPPAYLTPNLTIKDISRGLNYASGAGGVLDATGANYYIARLSFNQQLVYFAG  
TKQRYVTELGMADAANKFLADSIYMAVFGANDYINNYLVTFSPTPSLYNTSQFDMLISTYSQQISRLYDL  
GARKMVFVGVPLGCPNQMRTTDQKCNQVNSYVQGFNAALQRQLSGILLKQLPKVRFAYAHGYDRFI  
DMVKSPASYGFKVTDEGCCGLGRNLGLACMPISNLCSNRKEYLFWDFPHPTAAANMVIATDFYNGTTAY  
ASPINVEELASVSAVV\*

## **ESP**

>ESP\_AT1G54040  
MAPTLQGQWIKVQKGGTGPGRSSHGIAAVGDKLYSFGGELTPNKHIDKDLVDFDNTQTWSIAQPKGD

APTVSCLGVRMVAVGTKIYIFGGRDENRNFNFRSYDTVTSEWTFCLKLDEVGGPEARTFHSMASDENHV  
YVFGGVSXKGGTMNTPTRFRTIEAYNIADGKWAQLPDPDGNFEKRGAGFAVVGKIVVYVGFATSIVPGG  
KDDYESNAVQFYDQASKWTEVETTGAKPARSVFAHA VVGKYIIIFAGEVWPDNLNGHYGPGTLSNEG YA  
LDTETLVWEKLGEEGAPAIRGWTAYTAATVDGKNGLLMHGGKLPNTERTDDLYFYAVNSA-

>ChINC64A\_1\_19060\_e\_gw1.2.231.1

MRWVELASKGDVPPQARSSHSITAVGDRLYLWGGESAPRVPISDMHAYDMQAAQWSLVQAQGTTPSLRNA  
HAAAAIAGAGIYIFGGRSGIDIGESLNDLHRFDAESATWVEVVRPASEAVPPKRSYHAMAAAQGRLYVFGG  
CGEGSTGRNLNDLWEFDLSTATWRQLPSSDAIKASGNRTLGRGGAGFAAVPCALFVVAGFAGQEMGDVHRQ  
GRGAGPPGGSSSCGHDPVALPARSVCAVAHGCAGCLHSNHIVVFGGEVDPSTQGHAGAGCYSADTFCL  
DTACGHWHHSISAGGQPPSPRGWLAATACGTGVVVHGGNSASNQRLADMFLLEMH\*

>Chlre3\_119172\_e\_gwW.27.78.1

MWRKLPQDGSVPIDRSSHSITVIGNKVYVFGGEHDPVPGVGNELYEYDMATGTWRVVEAKGEAPPRVAH  
AAAAVGSTLYVFGGRWMEGASNLHAFDTATATWRLLATSGPAPAERSYHTMTSMGNKLYVFGGCGEK  
RLNDLHQFDTTTNSPLAVPSAEA VPRGGSCLLPGAVGGGKPPQLYVVAGFCGRELDDMHVYRRAGLG  
LRVWAPGKKGHCRPAVCSARACTSHAGAVLVYGGGEVDPDKGHDGAGDFCASLMEYGAAAAAGSWRPLEA  
GGESPGPRGWFAAATTPDGRLLLHGGLDGNQRLGDMFVLDVHAAA\*

>Chlvu1\_69839\_fgeneshCV\_pm.C\_scaffold\_1300007

MKWDKLDQAGQVPLSRSSHTITFIKKVTGKAYVFGGEHEPRTPIDSQIHAFDLDSRTWDPVQCSGDAPCP  
RVAHSAAPVGHITTYIFGGRPGIEMGEGSMNDLYGFDTKLRKWSKVEAEGPPPEARSFHAMVASGRLNDLH  
IFDTESQWLQMPSSPDIKGRGGAGLVASADGGSFLVVGFGAGHELNDVHRFDLGSRTWDCPACCSGEGA  
ADRSLLPARSVFVLFVGGGEVDPDKGHAGAGQFSSDKFCLDTAKGGAGWHMLAAAGSPPTPRGWFAATAV  
PGGMLVHGGNSPNERLQDMYILDHSE\*

>MicpuC2\_18187

MAPDPHHVTWRARSPANAPIARSSHGASVINNTLYVFGGEHVARTPIDSVVHALDLTDPNAAFVAIDGGA  
NAPPRVGHAGASINENFYVFGGRRGVEMNESPLNDLWAFDVEGREWTDLSGGAGDVPCPRSFHVATAAR  
GKLYVFGGCGPADAGRLADLHEYDVASKTWTKLPGSDAIESRGGAGFSSTTDGSTLVIAGGFAGREMKDI  
HAYDIASKTWRARPAPAPLRPRSVWVMAFTCYGDHVIIGFVGGVDPSEGRHGDGAGGFANDVVAIEVRTGD  
AKTLPLGRGGLGAGVGGGDGEEETA VPAPRGWTA AAEWRREGAIVLFGGLSGSDAAPERLGDVQIGYIDR  
GGLLA\*

>Ostta4\_34059\_0700010412

MARASSGASVTPNVTQVRDRFGTNPGGGRAGHAGCATADGRAIVVGGGRSTTGDRMYLADVWELDLRRVNS  
STERRMYVWMLHDGVSPGMVPSGRSGSAAVVVRGDVYVFGGYSSALRGDLDDLWVFNRTSGSWSLSPV  
DGYKPPGRSGASVSAPEGEAGGALVVYGGNGRNDVWEYDVEDANRWTMIKENTASSMSGVGSARMGATVIL  
AIFVASLA\*

>Volca1\_82875

MRWTRLPQAGTLPVERSSHSITVVGDKIVLFGGEHDPVPISELAYYSFTDGTWRVLD AIGEPSPRVA  
HSAAAIGNTLYIFGGRSGLDMGEGASNDLYAFDLETSTWSQLQPKGDLPPKRSYHTMTAVGKLYVFGGC  
GEEGRNLNDLHEYDVTTETWRPLAKPPAEAVPGRGGSCVLAARKPGGEVDEPLLYVIAGFCGRELDDMHVY  
SIAEDA WCGASCPCSGPSAAAEKLSARSVFGAGVHSCDLGECGHRNVVLVYGGGEVDPDKGHDGAGDFC  
SSLVEFGSGARACGGEGEGKHGAGWRVMEAGGDSPPRGWGFASATSDGRLVIHGGLDGNNERLGDLYVL  
DVHAN\*

>Selmo1\_79877\_e\_gw1.3.775.1

MDFFLSFQITQEGAPKARSSHAVAVVGSKAYVFGGEFEPVPIDNKVHVFDLQRQSWAVAELRGEIPS  
ARVGVAMAAAGNTIFVFGGRDEQHQLNEFFSFDVTGWRLLSAEETSPPHRSYHTLAADKQGNITFTF  
GGCGKAGRLNDLWVFNIESSTWKKLPESSTLTPRGGPGLAVVNGAVWVIFGFCGDELTDVHRFDIASQTW  
EEVQVSCSSLQKPIGRSVFGTSCVGNKIFLYGGEVDPDGLGHLGAGAFTEDELLVLDTEKLAWEKPRLEGK  
HPGARGWYAAAGFENSMLVYGGNSATNDRLLDDMFLLSVRA\*

>Phypa1\_1\_169924

MATSLRVKWREVTQAGAPVARSSHAVAVVGGKAYVFGGEFEPVPLDNDVHVFDLETQQWCVMETSGDK  
PSPRVGVGMAAVDSIVYIFAGRNDHEELNEFYALDNTNGVWKLSSGSESPPHRSYHAVA AHEHRKQVF  
TFGGCGKNGRLNDLWCFDIANGVWEQLPSTPESNLIPRGGPGLVAVRDHVWIIIFGFCGHELSDIHRFNL  
DEQTWEEVQCTGEKPTGRSVFGTATIGSKIVLYGGEVDPDQGHMGAGAFSSEVLVLDAYHLSWSRPDVS  
VEGERDPGARGWYAAAAGFNSMLVYGGNSDSNDRLLDDIFVLSLEE\*

>AT4G04670.1\_ReBlastOutgroup

MDFEKRKAATLASIRSSVTDKSPKGFLEPIPLETINHHPYSYFTTSSCSGRISILSQP  
KPKSNDSTKKKARGGSWL YITHDPADSDLVISLLFPSKSNQIDPIDQPSL VFRFEPLII  
AVECKDLGSAQFLVALAISAGFRESGITSCGDGKRVIIAIRC SIRMEVPIGDETEKLMVSP  
EYVKFLVDIANEKMDANRKRRTDGFVALASNGFKNPDENDVDEDDNYENLAANHDSINN  
GNLYPGVQKELIPLEKLSIVGEPVEKLHLWGHSACTIDESDRKEVIVFGGFGGFRHARR  
NESLLLNPSCGTLKLI AVNESPSARLGH TASMVGDFM FVIGGRADPLNLDVWRLDIST  
GEWSSQRVCGSEFPFRHRHAAASVGTKVYIFGGLYNDKIVSSMHILDTKDLQWKEVEQQG  
QWPCARHSHAMVA YGSQFMFGGYNENLVNDLYSFDVQSCSWKLEVISGK WPHARFSHS  
MFVYKHTIGIIGGCPVSNQCQELTLLDLKHRLWRSVRLEFMNKELFVRSTASILGDDLIV  
IGGGAACYAFGTFKSEPVKINLVQSVTMSENHLPQPEDVSLSENKNNADLKTETSLSQP  
WVIQLERKYAKFGKDKILKSFGLDLERKVYSNEKGLCICFPVTENFSEL FHEKQLLGKDF  
ERSEENLTKGLSLKDISCSAALNLLKEHGAKKLINVAFEAKK VAKSPLQRMREDITSIL

KQKGLPEELLDELPOKWERLGDIVVVPATSFKDPTWSSINDEVWCAVSKLSANRLARQG  
RVEPNGTRDSTLEILVGDNGWVNHRENGILYSFDTAKCMFWSWGNLSEKLRMGNMACEENEV  
VVDFLAGIFYFVLPFLVRKAKLVYACEWNPHAIERALRRNVEANSVSERICILEGDNRRIT  
APKGVADRVLNGLIPSEGSWVTAIQALRPEGGLHVVHGNVKDSDESSWGEHVTKTSLSDI  
ARAEGRSWEVTVEHIEKVWYAPRIRHLVADVRCR-

>Osta4|1600|gw1.13.00.93.1

LGKVSESKTTGARKTERKSERNAEKNHRRRLERGLIEDDIDAILNAMTIEDARRAEVEVERDVVKPCARGH  
ASLSTTTTQRPNEMILYGGERVAPGSEKCEVFGDLHRVDVGKDRWTRVTNAKMPHPRSGHQALCHGNLYL  
VFMGEFTSPNQERFLHHRDAWRFDLETNIWEQLPTKGGPSARSGHRIATWGKKAIMFGGFYDNGRDKVYY  
NDVWEFDLEKCEWKCRCVGGEGALGPSRPSACHVGVHGDEFVLYGGYCKNVDDDDENDDERSERGTTFSDA  
WSLNLKTWKWEKLRQGLAPSARAGSSSAMHALKKRLVLFGGVVDHEVKNGDVIVSEFFTDYLNLMNEAK  
KWFVPVTLYGDDKTKTHKAGSLEEAEVAAGETLPRPRGRINAASIKANSMYLFGGVIELGDVEVSLDDI  
WKLDLGARPKWTCISPLSEECQNALTGGGAESSEDDDEDGSESD

>Ost9901\_3|32404|eugene.0700010001

MSRAHDADGVEDAVLFDDEKTLLLDALERQASRGPCQGRPWDLWDPAGALAYDAWSMLGNISPERAMEL  
YCEVISSRYADWFDMLVRGMSEKQKRAMIATAKECALEYRALASGALGESARLAQTKDARRALAFNSST  
GPTAFLDEMFAAADDEFVRLPILSKVSPRARSGHMSAVVDGDTIFFSHGRGRSRLGDLWAFDLATGA  
WAERLQWPGSTCAGAASATIGSKLYAFRGKSADDCVDGVYSLTVSAIDLADYASKDFKWHMLDRCETS  
DEVSTPPRARSGHSTAIAGDRIFIFGGVDAKTGDDDELWEFTPTTTVWKKLANGTRPRSSHAATSVDER  
YLLVCGGSTGNELCDCGAVDVYDVVKGEWGTVDGDNDGDRPSPRAAHASVAIGNQWVFIGGGDNENATQ  
DAYTFDLRACVDERKCRWTLFAESCALIGKEGMSASAVVSPSSKRVFLLHGGLENEKAVCDTIACRLAP  
LASH\*

## **GH3s**

>SCPL50\_AT1G15000

MEQATTLFILLSTLLAVSVESQPPLFPDEALPTKSGYLPVKPAPGSSMFYAFYEAQEPTTPLPDTPLL  
VWLQGGPGCSSMIGNFYELGPWRVVSRAIDLERNPGA WNRFLGLLFVDNPIGVGFSIAASQQDIPTNQRO  
VAEHLAALVEFLEQNPSFENRPVYFTGESYAGKYVPAIGYYILKEKPNGKVNKGLAIGNGLTDPVTQV  
QTHAVNVYYSGLVNAKQRVELQKAQEISVALVKSQKWREAADARTELLTLLSNMTGLATLYNTARAIPYR  
TDLVVDLLNQREAKRVLGVSETVRFEESDEVEDVLRADVMKSVKFMVEYALERTQVLLYQGMGLDRDGV  
VSTEEWMKTMNWSGLGMFSTAERRVWKDEDEGVVAGYVQRWGNLCHVAVTGAGHFVPTDKAVNSRDMIEGW  
VLGKGLFGGKDVKQTTSSSLYHSI

>AT1G23160

MSLTSDLSEKSSDKMKVLEDLTSNVTQIQDNVLEEILTLNANTNYLQKFFLGSFDKESFKKNVPVVYED  
VKPYIERVVNGEPSNVISARPITGFVLSTGTSGGAQKMMMPWNEKYLDNLTMYDLRMHIISNNVKDVEKG  
KAMMFYFTKLESITPSGLPARVASSYLYKSNYFKNRPSNWYYSYTSPEVTLCPDNKQNLCHLLCGLVQ  
RNEVTRMGSIFASVMVRAIKFLEDSEWELCSNIRSGQLSEWITDIGCRDSVSLVGGPHPEAADTIEQIC  
NQKCKWGIITRLWPKAKYIETIVTGSVMQYVPTLNYYSNNMLPLISTYIYASSETQFGLNLPMPCKPEDVS  
YTFMPNVSYFEPVVDGDKNDVVDLADVKGCCYEA VVTNFSGLYRIRVGDILVVTGFHNKAPQFRFIRR  
DNVVLSDLDKTNEDDLFKA VNNAKLTLDSHMLMLIDFTSYADISTIPGHYVVYWEVKNKNEDKSKKHI  
ELKEETFSECLLMEDSLDSVYKICRFKEESVGPLKIVVRQGTDFSLMDYFISQGASIGQYKTPRCIKS  
GKALEVLEENVVATFFST

>GH3.17\_AT1G28130\_GH3.17

MIPSYDPNDTEAGLKLEDLTTNAEAIQQVLHQILSQNSGTQYLRAFLDGEADKNQSQSFKNKVPVVNYD  
DVKPIQRIADGESSDIVSAQPITELLTSSGTSAGKPKLMPSTAEELEKRTFFYSMLVPIMNKYVDGLDE  
GKGMYLFLFIKPEIKTPSGLMARPVLTSSYKQHFNRNPFKNYVNTSPDQTLQCQDSKQSMYCQLLCLV  
QRSHVLRVGAVFASAFRAVKFLEDHYKELCADIRGTVTSWITDSSCRDSVLSILNGPNQELADEIESE  
CAEKSWEGILRRIWPKAKYVEVIVTGSMAQYIPTLEFYSGGLPLVSTMYASSECYFGINLNPCLDPADVS  
YTLNPNMAYFEFLPVDDKSHHEIHFATHSNTDDDDDALKEDLIVNLVNVVEVQYYEIVITFTGLYRVR  
GDILKVTGFHNKAPQFRFVQRNVLSDIDTKTSEEDLLNAVTAQAKLNLQHPSSLLLTEYTSYADTSSI  
PGHYVLFWELKPRHSNDPPKLDKTMEDCCSEVEDCLDYVYRRCRNRDKSIGPLEIRVSLGTFDSLMDF  
CVSQGSSLNQYKTPRCVKSGGALEILDSRVIGRFFSKRVPQWEPLGLDS

>AT1G48660

MSLSVELKDLEVLTTNAKQIQDDVLKEILTLNANTEYLKRFLDGSSEKELFKKNVPVSYNDVKPYIERV  
ANGEPSDVISGGTITRFVQSTGTSGGIHKIFPVNDKYIENLGYLLAVSSLITSNDKVDKGGKMAFLYNR  
LESKTPSGLALSSSFTSYFMSDYFKNRSSKCNSEYTSPOQVILCPDNQSVYCHLLCGLSQREKVVGVSA  
TFAHALIKAINALQIYWKELSSNIRSGHVEWITDLDCKNASVAILGGPDPDELADVIEQECSHKSWEGII  
TRLWPKAKFIECIVTGQMAQYIPTLDFYSNKLPIVSMVYGSSESIFGVNVDPLSKPQDVSYTFLPNISYF  
EFLPIDHEEDMNTIVDLVGVKLGCCYETVVTSYFGLHRYLIGDILQVTGFYNNTPQFRFVRRKNIVLSVN  
SEATTEQDILKGLASATLVLESSNSMLTGFTCYADISSFPGHYVYFVWELKAKDVDDVVELDENVLEECY  
ALEESFDALYKRLRSKEGSIGALEIKVVQGTDFSLMEYFISKGGVSAQYKTPMCINSSETLAVLEDKVI  
ARFYSQKSPPLNL

>AT1G48670

MMNPSLNLMDLEELTSNAKQIQEDVLEEILTLNANTEYLHRFLHGSSDKVLFKKNVPVVYDVKPYIER  
VANGEPSDVISGGPITMFLRSTGTSGGKQKVPVNDKYIEKLGYYIALRSLAMSKHFDSGGEQGKAMEFH  
CTKPPSATPSGLPRDEVVRGAFAFVLRVIDFLKHWKELCSNIRSGHVSEWITDLEGRNAVSTILRG

PDSILADVIEQECSHKSWEGITRLWPKAKYIDCIITGQMSQYIPMLEFYSNKLPVSTTYGSSESTFGM  
NVDPLCKPQDTSYTCAPNISYFELPVDHKGDMASIVDLVDVVKLGCYEPVVTNYFGLHRYLIGDILQVT  
GFDYNNTPQFRFVHRKNVLSVSRSETTEEDILKALNHVGLVLESSDMLMGTFCYADISTFPGHYVFYWE  
LKAADVDVFELEEKVMVKCCSLLLEESFDEVYRKNRSKDECIGPLEIRVVQQGTFDSLMEYFISQGGGSA  
QYKTPICINSSEALAVLENKVLARFFSEKSPPLDS

>AT1G48690

MSLRFELKDLEELTSNVKQVQDDLLLEILQINANTEYLQCFLHRSSSKELFKKNVPPVSYDDVPRYIERV  
ANGEPSNIFTGETITNFFLSSGTSGGKQKIFPVNKNKYFENMIFIHALCSSTISKYIDGIGEGKVM AFLNT  
RPFKTPSGLPVAPLSTSFAMSDYFKNRPSKCYISPDEVILCVDNRQNMV

>GH3.4\_AT1G59500

MAVDSLLQSGMASPTTSETEVKALKFIEEITRNPDSVQEKVLGEILSRNSNTEYLKRFDLNGAVDRKSKF  
SKVPVVIYEDLKTDIRISNGDRSPILSSHPITEFLTSSGTSAGERKLMPTIEEDINRRQLLGNLLMPVM  
NLYVPGLDKKGKLYFLFVKSESTTSGGLPARPALTSYYKSDYFRSTSDSDSVYTSPEKAILCCDSSQSMY  
QMLCGLLMRHEVNRLLGAVFSPGLLRRAISFLQNNWKELSQDISTGTLSSKIFDHAIKTRMSNILNKPDQEL  
AEFLIGVCSQENWEGITKIWPNTKYLDVIVTGAMAQYIPMLEYSSGGLPMASMIYASSEYFGINLNP  
CKPSEVSYTIFPNMAYFEFLPHNHGDGGVEATSLVELADVEVGKEYELVITTYAGLYRYRVGDILRVGT  
FHNSAPQFKFIRRENVLSSIESDKTDEADLQKAVENASRLAEQGTRVIEYTSYADTKTIPGHYVIYVWEL  
LSRDQSNALPSDEVMAKCCLEMEESLNAVYRQSRVSDKSIGPLEIRVVQNGTFEELMDFSISRGSINQY  
KVPRCVSLTPIMKLLDSRVVSAHFSPSLPHWSPERRH

>AT2G14960

MAVDSNLSPLGPPACEKDAKALRFIEEMTRNADTVQENLLAEILARNADTEYLRRFNLGATDRDFTFKT  
KIPVITYEDLQPEIQRIADGDRSPILSAHPISEFLTSSGTSAGERKLMPTIKEELDRRQLLYSLLMPVMN  
LYVPGLDKKGKMYFLFVKSETKTPGGLPARPVLTSYYKSEHFRSRPYDPYNYVYTSNEAILCPDSFQSMY  
TQMLCGLLDRLSVLRVGAVFASGLLRRAIRFLQLHWSRFAHDIELGCLDSEITDPSIRQCMSGILKPDVPL  
AEFIRRECKSDNWEKIITRIWPNTKYLDVIVTGAMAQYIPTLEYSSGGLPMACTMYASSEYFGLNLP  
SKPSEVSYTIMPNMAYFEFLPHHVEPTKSELVELADVEVGKEYELVITTYAGLCRYRVGDILRVGFHNSAPQ  
HFVRRKNVLLSIDS DKTDESELQKAVENASSILHEECGSRVAEYTSYADTSTIPGHYVLYWELLVRD GAR  
QPSHETLTRCCLGMEESLNSVYRQSRVADNSVGPLEIRVVRNGTFEELMDY AISRGASINQYKVPRCVNF  
TPIVELLDSRVVSAHFSPSLPHWTPERRR

>GH3.3\_AT2G23170

MTVDSALRSPMMHSPSTKDVKALRFIEEMTRNVDVQKKVIREILSRNSDTEYLKRFGLKGFTDRKTKFT  
KVPVVIYDDLKPEIQRIANGDRSMILSSYPITEFLTSSGTSAGERKLMPTIDEDMDRRQLLYSLLMPVMN  
LYVPGLDKKGKALYFLFVKTESKTPGGLPARPVLTSYYKSEQFRRPNDPYNYVYTSNEAILCPDSSQSMY  
TQMLCGLLMRHEVLRLLGAVFASGLLRRAIGFLQTNWKELADDISTGTLSSRISDPAIKESMSKILTKPDQE  
LADFITSVCGQDNSWEGITKIWPNTKYLDVIVTGAMAQYIPMLEYSSGGLPMACTMYASSEYFGINLK  
PMCKPSEVSYTIMPNMAYFEFLPHHVEPTKSELVELADVEVGKEYELVITTYAGLNRYRVGDILQVVTG  
YNSAPQFKFVRRKNVLLSIESDKTDEAELQSAVENASLLGEGQTRVIEYTSYAETKIPGHYVIYVWEL  
VKDQVTNPPNDEVMARCCLEMEESLNSVYRQSRVADKKSIGPLEIRVVKNGTFEELMDY AISRGASINQYKV  
PRCVSFTPIMELLDSTRVSTHFSALPHWSPERRR

>AT2G47750

MDVMKLDHDSVLKELERITSKAAEVQDNILRGILERNKDTEYLSKYMNGSKDVLEFKRAVPIIIYKDIYP  
YIQRIANGEDSSLITGHSITEILCSSGTSAGEPKLMPTIPEDLDRRTFLYNLIPIVKNYITGLDKGKAM  
YLNFKVKAETSTPCGLPIRAVLTSSYYKSKHFQCRPYDPFNDLTSPQITLCEDSNQSMY CQLLAGLIHRHK  
VMRLGAVFASAFRAISYLEKKWSQLCEDIRTGSLNPMITDPGCQMAMSCLLMSPNPELASEIEIEICGRS  
SWKGLCQLWPKAKFIEAVVTGSMQAQYIPALEFFSQKIPLVCPMYASSETYFGVNVPELKSQSDVFTL  
LPNMCYFEFIPLGKNGTSLFDLDDDEQVPCDKVVDLVNKLGRYELVVTTFAGLYRYRIGDVLQVAGFY  
NGAPQFRFCRRNVVLSIDLKTNEDLHRSITLAKKKLGSNAFLAEYTSYADTSSVPGHYVLFWEIQGH  
LEPKLMEECCVAVEEELDYIYRQCRTKERSIGALEIRVVKPGTFEKLMDLIISQGGSFNQYKTPRCVKN  
SATFKLLNGHVMASSFFSPRDPTWVP

>AT4G03400

METVEAGHDDVIGWFEHVSENACKVQSETLRRILELNSGVEYLRLKWLGTVDVEKMDDYTLETLFTSLVPI  
VSHADLRPIYQRIADGETSPLLQEPITVLSLSSGTTEGRQKYVPFTRHSAQTTLQIFRLSAAYSRFPY  
IREGGRILEFIYAGKEFKTLGGLTVGTATTHYASEEFKTKQETTKSFTCSQPEVISGGDFGQCTYCHLL  
LGLHYSSQVEFVASAFSYTIVQAFSFFEEIWEICADIKEGNLSSRITLPKMRKAVLALIRPNPNSLASHI  
EEICLELETNLGWFLGSKLWPNAKFISSIMTGSMLPYLNKLRHYAGGLPLVSADYGSTESWIGVNVDPH  
LPPEDVSFAVIPTFSYFEFIPLYRRQNQSDICIDGDFVEDKPVPLSQVKLQGEYELVLTFTGLYRYRLG  
DVVEVTSFHKGTPKLSFIYRRKLILINIDKNTEKDLQRVVDKASQLLSRSTRAEVVDFTSHADVIARPG  
HYVIYWEIRGEADDALEECREMDTAFVDYGYVVSRRMNSIGPLELRVVERGTGFKVAERCVGKCGGLN  
QFKTPRCTNSVMLDILNDSTIKFRSSAYD

>GH3.5\_AT4G27260

MPEAPKKESLEVFDLTLQKNKQKLQIEELTSNADQVQRQVLEEILTRNADVEYLRRHDLNGRDRET  
KNIMPVITYEDIEPEINRIANGDKSPILSSKPISEFLTSSGTSAGERKLMPTIEEELDRRSLLYSLLMPV  
MSQFVPGLENGKGMFLFIKSESKTPGGLPARPVLTSYYKSSHFKERPYDPYNYVYTSNETILCSDSYQS  
MYSQMLCGLCQHQEVLRVGAVFASGFIRAIFLEKHWIELVRDIRTGTLSLITDPSVREAVAKILKPS  
KLADVFVEFECKKSSWGIIITRLWPNTKYVDVIVTGMSQYIPTLDYYSNGLPLVCTMYASSEYFGVNL  
PLCKPSEVSYTLIPSMAYFEFLPVHRNNGVTNSINLPKALTEKEQELVDLVDVVKLQGEYELVVTYAGL  
CRYRVGDLLRVGTGFKNAPOQSFICRKNVLSIDS DKTDEVELQNAVKNVTHLVPFDASLSEYTSYADT  
SSIPGHYVLFWELCLDGNTPIPPSVFEDCCLAVEESFNTVYRQGRVSDKSIGPLEIKIVPEGTDFKMDY

AISLGASINQYKTPRCVKFAPHIELLSNRVVDVSYFSPKCPKWVPGHKQWGSN

>GH3.2\_AT4G37390

MAVDSPLQSRMVSAATTSEKDVKALKFIEEMTRNPDSVQEKVLGEILTRNSNTEYLKRFDLGDGVVDRKTFK  
SKVPVVTYEDLKPEIQIRISNGDCSPILSSHPITEFLTSSGTSAGERKLMPTIEEDLDRRQLLYSLLMPVM  
NLYVPLGLDKGKGLYFLFKVSKESKTSGLPARPVLTSSYKSDHFKRRPYDPYNNVYTSNPNEALCSDSSQSM  
YAQMLCGLMRHEVRLGAVFASGLLRRAISFLQNNWKELEARDISTGTLSRIFDPAIKNRMSKILTKPDQ  
ELAEFLGAVFVCSQENWEGITKWPNTKYLVDVITGAMAQYIPTLEYSSGGLPMACTMYASSEYFGLNK  
PMCKPSEVSYTIMPNMAYFEFLPHNHGDGAAEASLDETSVELANVEVGKEYELVITTYAGLYRYRVGD  
ILRVTGFHNSAPQFKFIRRNKLVLLSVESDKTDEAELQKAVENASRLFAEQGTRVIEYTSYAETKTIPGHY  
VIYWELLGRDQSNALMSEEVMAKCCLEMEESLNSVYRQSRVADKISGLEIRVVRNGTFEELMDYAIRG  
ASINQYKVPKRVCSFTPIEMELLSRVVSAHFSPSLPHWSPERRR

>AT5G13320

MKPIFDINETFEKQLKDLTSNVKSIQDNLLLEEITPNTKTEYLQRFIDRFDKELFKKNVPIVSYEDIKIP  
YLDREVNGESSDVISARTITGFLSSGTSGGAAQKMPWNKYLDNLTFIYDLRMQVITKHVKGVVEEGKGM  
MFLFTKQESMTPSGLPARVATSSYFKSDYFKNRPSNWYYSYTSPPDEVILCPNNTESLYCHLLCGLVQRDE  
VVRTGSIFASVMVRAIEVLKNSWEELCSNIRSGHLSNWVTDLGCQNSVSLVLGGPRPELADTIEEICNQ  
SWKGIVKRLWPNTKYIETVVTGSMGQYVPMNLNYCNDLPLVSTTYGSSETTFGINLDPCKPEDVSYTFM  
PNMSYFEFIPMDGDGKNDVVDLEDVKLCTYEPVVTNFAGLYRMRVGDIVLVTGFYNNAPQFKFVRRNV  
VLSIDSDKTNNEEDLFAVSAQAKLVLESSGLDLKDFTSYADTSTFPGHYVVYLEVDTKEGEEKETAQFELD  
EEALSTCCLVMEESLNDVYKRCRFKDGISGLEIRVVRQGTDFSLMDFISQGASTGQYKTPRCIKSGKA  
LQVLETCVVAKFFSI-

>AT5G13350

MLPKFDLTDPKASLSLLEDVTTNVTQIQDSILEAVLSRNAHEYLKGFNLGQVDKQTFKKNVPIVYEDI  
KPYINRIANGEASDLICDRPISLLVMSSGTTAGIQNLIPLTTEDGEQRIMFGSLYRSLLYKYVEGIREGK  
SLTFYFVNPERETASGILRTMITCILKSVNKTNSLWDLRQISPHIEISTCEDTTQSMYQCLLCGLLQRD  
NVARLGAPFASVIRVIKYLEGHWQELCSNIRTGRLSDWITDPQCVSGISKFLTAPNPDLASLIEQECCK  
TSWEAIVKRLWPKAKCIEAVVTGSMQAQYIPLLEFYGGGLPLISSWYGSSECFMGVNVNPLCKPSDVSYTI  
IPSMAYFEFLEVKKQDQEAAGLDPHENHVVVDLVDVKIGHDYEPVVTTFSGLYRYRVGDLLRVTGFYNNAP  
HFRFVGRQKVVLSLHMANTYEEEDLLKAVTNAKLLEPHDLMLMDFTSRVDSSSFVGHYVLYWELGSKVKD  
AKLEPNRDVMEECCTVEKYLDPYRQERRKDKNIGPLEIKVVKPGAFDELNMFFLSRGSSVSQYKTPRS  
VKTEEAVKILEANVVSEFLSQETPPWG-

>AT5G13360

MLPKFDPTDQKACLLEDVTTNVTQIQDSVLEAILSRNAHEYLSGFLNGQADKKSFKKNVPIVYEDI  
KPYIDRIANGEPSDLICDRPISVLLTSSGTSGGVPKLIPLTTEELEQRISFASLYRPLLYKYIEGIRERK  
SFMLYFVTRESETASGILVRTMITCVLKSVPANSFIWDQSQISPHAITTCSDDTTQSMYQCLLCGLLQRD  
NVGRLGAPFASSFLKIKFLEDHWPFCNSNIRTGCLSDWITDPQCVSGIGKFLTAPNPDLASLIEQECCK  
TSWEAIVKRLWPKAKCIEAIVTGTMAQYIPLLEFYGGGLPLISSWYGSSECFMGVNVNPLCKPSDVSYTI  
IPCMAYFEFLEVEKDHQEAAGHDPTEKPVVVDLVDVKIGHDYEPVVTTFAGLYRYRGLDVLRVVTGFYNNAP  
FHFVGRQKVVLSDMDKTYEEDLLKAVTNASLLEPHDLMLMDFTSRVDSSSFVGHYVLYWELGRKVKDA  
KLELDQNVLEECCTVEESLDAVYRKGGRKNDKNIGPLEIKVVKPGAFDELNMFFLSRGSSVSQYKTPRSV  
TNEEALKILEANVVSEFLSQKTPSWELHELHSSR

>AT5G13370

MLPKFDPTNQAACLLEDLTTNVTQIQDSVLEAILSRNAQTEYLRGFLNGQVDKQNFKKNVPIVYEDI  
RSYIDRIANGEPSDLICDRPISVLLTSSGTSGGVPKLIPLTTEDEQRISFSSLYAPLLYKHIDGLSEGK  
SLIFYFVTRESKTANGLMVRTMVTSLKSIKQTNLSFLWDSLQVSPHAIITCADTTQSMYQCLLCGLLERD  
NVARLGAPFASSFLKVIKFLLEDHWPFCNSNIRTGRLSDWITDATCTSGIGKFLTAPNPDLASLIEQECCK  
TSWEAILKRLWPKAKCIESIITGTMAQYIPLLEFYGGGLPLISSWYGSSECFMGVNVNPLCKPSDVSYTI  
IPCMGYFEFLEVEKDHQEAAGHDPTEKPVVVDLVDVKIGHDYEPVVTTFAGLYRYRGLDVLRVATGFYNNAP  
HFCFVGRQKVVLSDMDKTYEEDLLKAVTNAKLLEPHDLMLMDFTSRVDSSSFVGHYVLYWELGSKVKD  
AKFEPNRDVMEECCTVEESLDAVYRKGGRKNDKNIGPLEIKVVKPGAFDELNMFFLSRGSSVSQYKTPRSV  
VTNEEALKILEANVISEFLSRKIPSWELHELHSGR-

>AT5G13380

MTPFICTERERDGSPIHCSQRKDNRAAIMLPKFDPTNPLATMSVLEDVTTNVTQIQDSLLEAILSRNS  
QTEYLRGFLTGQLDKQSFKKNVPIVYEDIKPHIDRIANGEPSDLICDRPISLALLATTGTSGGIPKLIPL  
TAEELQRIFLGFLYVPLVFKHIEGLTQGKSLMFYFVTRESETVSGLMVRFMITCVLKSVPNTNSFLWDR  
VQISPHAIACEDTNGMYCQLLCGLLQREHVARLGAPYASSFLKVIKFLLEDHWPFCNSNIRTGRLSDWI  
TDAQCVSGIGNFLTAPDPLANLIEQECCKTSWEAILSRIWPKAKCIEAIVTGTMAQYIPLLEFYGGGLP  
LVSSWYGSSECFIGINLNLPLSKPSDVSYTIIPSMGYFEFIEVVKDRQEAGHVPADPVVVDLVDVKIGHDY  
ELLVTTFSGLYRYRGLDVLRVVTGFHNNAPQFYFVGRQNVVLSIDLKTYEEDLLKAVKNASLLEPHDLML  
LMDFTSRVDLSSLPGHYVLYWELGNKFKNAKLDPKSNVLEECCLTVEESLDSIYREGKNDKIIIGPLEIK  
VVKPGAFDELNMFFLSRGSSVSQYKTPRSVTHEEALNILESNVVSEFLSRKTPSWELHELHSSR-

>AT5G51470

MSLCSDLTEKLEDEILEDLTSNVKQIQDNVLEEILTLNANTEYLRRFLHGSSSKELFKKNVPIVYEDVK  
PFIDRVNGEPPSDIISGNPITGFLSSGTSGGKQKMFPRNKNYLENIKFIFYRSLVISKHIDGLEHGKG  
MVFNFCTSENTTSPGLPSSAASSTFFKSDYFKNRPSYWHWSYTSPPDEVILCSDTKQTLCHLLCGLVQRD  
DVVKVGAFAVITLVRAINLLENSWKEICTNIRFGHLSWITDISCRDSVSKILGEPNPELADLIENECNN  
KSWEGIVPRLWPKAKFIECIATGQMAQHIPTLEFYSNKLPSISSYVSSETMFGINMSPLCKPENVSYTF  
LPNLSYFEFLLVDAGDKTEIVLDVVKLGCYIEPLVTNHSGLHRYKMGDILLVTGFYNNAPQFRFVRRGN

LTL SIHLEIT DEDLLNAVTD AKMVL ESSLMLMDFTSYADISTTPGHYVLYWELKAKYRNDIVEIDKNV  
LVECCYVVEESLNNSYRVYRSKGG LIGALEIRLVQQGTFDALMEFFITQGASSTQYKTPICIKSTEALVI  
LEENVHACFFTDKSLSLNFSS-

>AT5G54510\_GH3.6

MPEAPKIAALEVSD ESLAEKNKNKLQFIEDVTTNADDVQRRVLEEILSRNADVEYLKRHGLEGRTDRET  
KHIMPVVTYEDIQPEINRIANGDKSQVLC SNPISEFLTSSGTS GGERKLMPTIEEELDRRSLLYSLLMPV  
MDQFVPGLDK GKGM YFLFKSES KTPGGLPARPVLT SYKSSHFKNRPYDPYTNYS PNTILCSDSYQS  
MYSQMLCGLCQHKEVLRVGVAFASGFIRAIFLEKHWPELARDIRTGTL SSEITDSSVREAVGEILKDPD  
KLAD FVESECRKTSWQG IITRLWPNTKYVDVIVTGTMSQYIPTLDYYSNGLPLVCTMYASSECYFGVNL  
PLCKPSEVSYTLIPNMA YFEFLPVHRNSGVTSISL PKALTEKEQELVDLVDVKLGQEYELVVTTYAGL  
YRYRVGDVLSVAGFKNNAPQFSFICRKNVLSIDSDKTDEVELQNAVKNVTHLVPFDASLSEYTSYADT  
SSIPGHYVLFWELCLNGNTPIPPSVFEDCCLTIEESLNSVYRQGRVSDKSIGPLEIKMVESGTFDKLMDY  
AISLGASINQYKTPRCVKFAP IIIELLSNRVDSYFSPKCPKWSPGHKQWGSN-

>Chlvu1\_81116\_estExt\_fgeneshCV\_pg.C\_10222

MVHSGAQLNFSLSENEAQLHYFEVHSAKGRRHGHLGTFPVQNTGSGVA VTLKQPVLTSKNGRSGLRRLD  
WQHLQHMCAGAGSCIYLP LKVS DKLVTLN IASVQPD AFSGLVDELVAFAAVLAPVIGLQRLRRDLVAVDD  
LLRRILPAHIADSLHEL RQPLVSPGMPREVTQALVARATDRNGGSAPAAAPAATRIAAPPATAHAKSRAG  
PSTLPPQSTCPAAVSV ARSDRPAASQSCRPCWDGSM EGESICCKASAGKEARVAAAHC VLDAPVVR  
LFMDFATLLTLTPLL VLMRSRWTFEQAIPVATLVAVALAAMQMGGVLT YAKHRNSLLAGLRLVRLTVFA  
VNMAWVPVSEPLSCAGLCMDSGAFLAILSFSGQV PARVHLPLQATCITVLAADA VGCALGRTSVQLAL  
AKVVAQT VLGGLVPSL VLLHMEQAAALARHRSIARKKVD\*

>Phypa1\_1\_106250\_estExt\_fgenesh1\_pm.C\_670022

MALRIENPYKLLD TDEEIVEDFELMSRNARETQLELLRKILERNANVEYLQRQGLNGRTDEASFKACVP  
VSTYANIEADVDR IADGDTSPICCVDPPTSFALSSGTTGGKCKLIPRTDALLAQAMKAGQIGSVYRRRAF  
PRKHEGPPVMSVFQYAGRQFDTKSGLKAGTGTTNFYSAAFKNAKSAPFSATSPVDIVLGYDVPQQMYCH  
LLCGLYRCQVEQMSAIFAYMIVPEFRLLERVWRDICKDIREGTVNERVSDPELRSV LKVLSPNPELAD  
LIEREACAKGWSGIHRLFPNIN YIMSIFSGSMLPYVAPMRQYAGSVPLMNADYGASEAWIGINLDPRCPA  
EDASFTIIPNFAYFEFIPVNRDSAGYDSVEGDEIVGLTDVKVQGEYEIVLTTVGGLYRYRLGDIVKVTGF  
FNSTPKVAFVCRKGVVLSVNTDKTDEEELRLVVGKASLLKESNMELADYSSYTDQDSQPGHYVIFWELR  
SHELDMDLLSECCVLDQSFNNPYMRGRAARTIGLELAIVKEGAFARLMEQFVRKNGV GASQYKVSRC  
FKNPATLKHFRDETIATLRSPDFPELLAAWRPSTKIVG\*

>Phypa1\_1\_225552\_estExt\_Genewise1.C\_3230045

MASEVAKPVENGIHPKLEQSFDA PAATKPSNSELLKLRDGVFVMPSPKRGIDT TAPDFDPODFDL LLA  
DVMFIQHEKLREILEVQADVEYLRRVGLNGRTDVESFRKCVPIVSYGDLEADIMRVVNGEKTPIFTVDP  
VTLNLSGGTTAGKPKFIPSTTRA YEYFMFLQTFVTSYRREFPGYKDGTSFTLAFAGKQIDTPSGIKAGA  
QSTNHFRRGPMFRNRVRNANREYCV PDEVILSDDTTQSMYCHLLCALAQAP EIVKVYGTFAASIVSAVRAL  
QKHWEIVEDIRTGTLNAKITEPEMRTAVQ QMLHPNPDLASRIEECSKDNWEGILPRLFPNAHFSVCI  
SGSMLQYAPALKHFTSLPTISL YAAACECSFIGNPSPMKCAPEDITYMLWPETAYEYFIPLEDNSVEQ  
DGDVVRTVEACDLEVRQYELVVTNVIGLYRYRLGDVLTMKRFHKTAPVFEFVRRKNVILSVHTDKTDEK  
ELQSVVNLATEALAGTGMELSDY TSTADVSTLPGRYVIFWEMVDSSDLDYDVLQHCANTLDANFNSDYRR  
WRSGHQIGPLELRIVKEGTFNRVMDSAVARGASPSQYKPPRCVNNPHTRQILDDGLVASFHSTITPNPAP  
IALTGS\*

>Selmo1\_110439\_e\_gw1.40.401.1

MPGIPLISHSDALTYGFEELARNGNAVQAEELLEQILVQNADADYLKEHKLNGCTDLETFKARLPLITYAD  
IEGYIQIADGDQSP LLCQKPVDMFFLSSGTA KGRTKLIPAHYDFFLNTIRLFLQLSGAFRGRHFLSSNA  
KVM DIVYCGKQTMTKGGILTGTGTTNFRSEAFKLKQSTKMFNNSPNEVIFSSSLPQATYCHLLFALLA  
ADDIAVISSTFVY TIVEAFRLEKTWSILADCIESGTLPEWITDHA IQTVASKQLTQDHPDRDRGT LAAK  
IRLECSRGRFGIIPRLWRNTSYVLSIMTGTMLS YCEAMRFYAGPGLALVCGDYGASESWMGINMDPLSSP  
HNTIFTIVPDLAYFEFIPLERRNSL FTEVAAPVSMADVRVQGEYEIAITSSAGLYRYRVGDVVRICGFY  
HDLPPQFEFVCRRDVQLSIHIDKNGETELAVVMERSAAVLHGTGVGVVEYTAHADVSFRPGHYVVFVELDR  
DDFERVLQECCDCMDGAFVEPGYVVSRAAKTIGPLEL CVVERGTFRKLAEALDKGATLNQYKTPRCIAA  
SHLLAILRAGMVR SFYSGVRR\*

>Selmo1\_115497\_e\_gw1.51.6.1

MAASAIAEFEDACKNAASIQEELLGILRKNACCEYLQKYG SPLTVA AFKSVQVPVIGYDDIRSDLERIAG  
GDRGQILCHDPITSFFTSSGTS SGNKNIPATYENTVSVVKVLESSYAYKTNYFDLGGKRSVSLLYFKDL  
HATKSGLVFGPVTAHGIRSTRFQRVWRSSRTTPEYELVAASDFRELTYCHLLCALLQRHEVEQVECMYAY  
SICEALRFLQNEYWEELCNDIR TASA LSKTKVMDPKLRKA FERAGVFRSKCGNAMEADKIFKICSNESWSG  
ILPLLFPKAKLVSAVVTGAMTHYVPTLSFYAGDQLPIVQG GFFSSEGGIGINIDPLSPPEDVIYTVTPRS  
LYYEFPLPLGATEALSMHEVVIGELYEILVTNFAGLYRCRMGDVVQITSFFHGAPQMA YHHRKNVAVMCINN  
ETVDEQMLQNVVNVKSKDAGVEVLDFMIYGDPAAVPPSYTIFWELGNAKDYSKTQVLEQCCANVLKSNP  
EHTRKGT DGLIDS FELVIVKKGTFERLMEEAVKNGASPAQYKTPRCV ASSRILEALNSGRVHSYKSSAMS  
KVN\*

>Selmo1\_119116\_e\_gw1.60.367.1

MENEQLLEKLESSWS PGEAQDKVLTEILGKNATTYFNRHGLRAATKEVFRQRAPVIEYEDIKDEINR  
IADGEASTLLCANPITDMFTSSGTS GGAHKLFPKAEGHYAVSNYFFDLATA LLNRYSDLPGLRTGKALYF  
LYVRSGRKTPGGLPAPAL TGYYNSLEFRNRPFDPSNDYTSPMEVILCTDSVQASYCHLLCGLIHARDVT  
KLGCFASALVRSIRCLEAWWQELSRDIRTGTLSERVVDPACREAVEKILRPDP ELANVIDEACSSGSLK  
GIVRKLWPSAKAIDTVVTGAMEQYVGEVDYLTGGLPIASMIYASSEFFGVNLKPLCEPSQISYMLPET



SYEFLPVARSEEKVSRRKEPVELVDVEQGHYELVITTNAGLYRYRMGDVLRVEGFHNKAPLFSFVCRRN  
VLLSIDSDEKELQTAVMNAFAALRNGVTSKEGEAIRLTDYTSYADLSSNPPHYVIYWELSSSELHLEP  
EKAGECCYKMEESLSVYHRGRMERSIGALELRLVTPGTFNRIADDAASRGGSSVAQFKLPRCVKKNATRM  
LEIVESGVYQQYFSPRAPKY\*

>Selmo1\_124989\_e\_gw1.77.213.1

MEDFEAVCKNAVQAQEEALVQILQRNGSCHYLQRFQGPLCLKSFKTQPLPIISYDNISPELQIADHGTSH  
LLLGCDPILYFSFSSGTSSGKHILPQTNCGYSLARAYASSNAYRDEIFPLESTKPIGLHFVYSGEQYK  
AKSGLLLGAGSTNYKSEAYNQEAEATLATPYEALLAGSDWQQTYYCHLLCGLVQRHKIEFIHATFAYTSL  
EAFRLLESDEKELQTAVMNAFAALRNGVTSKEGEAIRLTDYTSYADLSSNPPHYVIYWELSSSELHLEP  
LLPLLWPRAKYVHTVVTGAMPEYIPVLKKYAGDKLAIVGFDYSASEGYLGINMRPATPPEEVVFTLIPYT  
MFFEFIPVDPEEVPDHQGETLQVGFQYELVVTTFEGLYRYRIGDVVKVTFGHHSPIVAFSYRK  
NAVLSINAKEVDEQELQKVVVMGSAGPLEIANFTSCADFATKERPHYVIYWELKNDGDNRSHEELRDS  
LDRGFNAAYLVGRVDKTLGALELVTVKQGTFEKLEMEKAIESGASASQYKTPRCIKSPALLELDQGAIGR  
YTSSDISLLAEDWKPSVIHGL\*

>Selmo1\_125145\_e\_gw1.77.217.1

MEDFEAVCKNAVQAQEEALVQILQRNGSCHYLQRFQGPLCLKSFKAQLPIISYDNISPELQIADHGTSH  
LLLGCDPILYFSFSSGTSSGKHILPQTNCGYSLARAYASSNAYRDEIFPLESTKPIGLHFVYSGEQYK  
AKSGLLLGAGSTNYKSEAYNQEAEATLATPYEALLAGSDWQQTYYCHLLCGLVQRHKIEFIHAAFAATLS  
EAFRLLESDEKELQTAVMNAFAALRNGVTSKEGEAIRLTDYTSYADLSSNPPHYVIYWELSSSELHLEP  
LLPLLWPRAKYVHTVVTGAMPEYIPVLKKYAGDKLAIVGFNYSASEGYLGINMRPATPPEEVVFTLIPYT  
MFFKIPVDPEEVPDHQGETLQVGFQYELVVTTFEGLYRYRIGDVVKVTFGHHSPIVAFSYRK  
NAVLSINVEKVDQELQKVVVMGSASPLEIANFTSCADFTTKERPHYVIYWELKNDGDNRSHEELRDS\*

>Selmo1\_125443\_e\_gw1.79.247.1

MEALVNEFEDMCRNAALVQEEILGAIVEHNASCEYLRSYNVTDTSFKAHIPIVDYEDIAARIQRMADGG  
PGSVLCKDPVIVFILSSATTTDKRKAFLPTTKSRSLKNHADKISAGYRERYIMLSQQNLINSSLAIFYAQ  
PHGTLSSGLPIMPSSYFTSQYKERPSRSTSTDEVIFGPWWESTYCHLLSGLILRTEVDYITSSFA  
TLVHAFNMLEAEWRNLCYDIRTGKLDKDERVKDVKLRAAVVGLREDPDSAGSIEEVCSSNVSWDQGVKLL  
WPKAKYLLTVVTGGMKPYIPALRRYAGGVHIMGRAYIGSEGVYGINIDPATEPENVVFTLVPTTYMEFL  
RLRDNKLVDSNLEISEQYELVITTHSGLYRYKVGDVVKVVAFFHESQMAFEYRRSAVLSVSLDMTSEQ  
ELQNVRRRTCIEANLEIVDFTSHSNLSEQPHYVIYWELKNEPNIYNSHALLNRCCNVLDRSFTSILYIT  
GRRTGTIGPLKLVTVKKGCFGRLEHAVRNGSAAQYKTPRCIKSPKLEILEGEIVTTRSSSEYLPKDH  
I\*

>Selmo1\_125904\_e\_gw1.80.84.1

MNTRDSDQILDVFDITRDVGAQAGILEQILAKNANVEYFKRHGLCGVPSRDDFKRAMPLSSYTDIES  
DITRMASGDDSRILTDAPVRQMLTSSGTSGGKQKLPKSETYDIESVLMNRISACLKQIPIQKSLQF  
IYVRKPGVTPGGVVTCSGLSGYFTSPAFLNRKIDPSSGFTSPDQVLLCVDQFQSSYAHLLCGLVQSTQVA  
VLGAFFASTLRVSMKRLSDCWRDLQDIRSGKANSNISDLVKHAVNALLRTPNPELADAIERECSSKKN  
WRGIITRLEPNARITQTIITGSMQYVVPVDFLSGELPIASPLYASSECSLGVNLSPLSPPSPILYITF  
PSFAYYEFLPVNCKNSTSGDLVELADVELGREYELVITNAGLYRYRVDVLRVVDVFNAPQFAFVRR  
GVLLSVDTKTDELELHTAVVNACSLLPQDFVVDYTSRVELCSHPGHYVVYWELSLPVSDSSVELLLE  
ECCSMLESSLSVYLRNRREGSVGAMEIKLLQNGTDFRIVDYVVSNRREGSVAQFKVPRCARDPTMIDILE  
SNVRSIRATHIPLPRL\*

>Selmo1\_163668\_estExt\_Genewise1Plus.C\_00471

MENEQLLEKLESSSWSPGEAQDKVLAIELEKNAATDYFNHRHGLRAATKEVFRQAPVIEYEDIKDEINR  
IADGEASTLLCANPIADMFTSSGTSGGAHKLFPKVEGHYAVSKYFFDLATALNDRDLPLRGTGKALYFLY  
VRSGRKTPGGLPAPALTYGYNLEFRNRPFDPNSDYTSPMEVILCTDSVQASYCHLLCGLIHARDVTKL  
GCFFASALVRSIRCLEAWWQELSRDIRTGTLSEVVDVDPACREAVEKILRPDPELANVIDEACSSGSLKGI  
VRKLPWSAKAIDTVVTGAMPEYVGEVDYLDGLPIASMIYASSEFFGVNKLPLCEPSQISYMFLPETS  
YEFLLPVARSEEKVSRRKEPVELVDVEQGHYELVITTNAGLYRYRMGDVLRVEGFHNKAPLFSFVCRRN  
VLLSIDSDEKELQTAVMNAFAALRNGVTSKEGEAIRLTDYTSYADLSSNPPHYVIYWELSSSELHLEP  
LEIVESGVYQQYFSPRAPKY\*

>Selmo1\_234778\_fgenes1\_pm.C\_scaffold\_67000004

MCRNATFVQEEILGAIVEHNASCEYLRSYNVTDADSFKAHIPIVDYENIAARIQRMADGGPGSVLCKDPV  
IAFILSSATTTDKRKAFLPTTKSRSLKNHADKISAGYGERDFVPGSPTALAFMYAQPHGTLSSGLPIM  
PGSSYFTSQYKERPSRSTSTDEVIFGPWWESTYCHLLSGLILRTEVDYITSSFAITLVHAFNMLEAEW  
RNLCDYDIRTGKLDKDERVKDVKLRAAVVGLREDPDSAGSIEEVCSSNVSWDQGVKLLWPKAKYLLTVVTG  
DMKPYIPALRRYAGGVHIMGREYIGSEGVYGININPATEPENVVFTLVPTTYMEFLRLRDNKLVSSDL  
EIGEYELVITTHSGLYRYKVGDVVKVVAFFHESQMAFEYRCMKQELQNVVRRRTCIEANLEIVDFTSHS  
NLSEQPHYVIYWELKNEPNIYNSHALLDRPFTSIVYIPERSEKWLCSWTVQDSKRRLSPLIEARNTLPK  
DQI\*

>Selmo1\_235392\_fgenes1\_pm.C\_scaffold\_84000032

MDPPRLGSAHRILSALDTEQVLRVFEAITSDVASIQSELLQILADNADVAFFHRHGLFGVPSAEDFHS  
RLPLISYQDIELDVARIASGDEGDGHAKILCARPVREVLKSSGTSGGRQKLPKLSYDPEFLVLRREAR  
FSSCPDRRHSRQGPFTGKSLHFIYVRNPEVTPGGVKLSSGLSGYFTSPAFLNRKIDPATSYTSPDQVQ  
CVDYQANYCHLLCGLVQRHQVVSIGSVFASTFVRSLSKLCQWKDICQDIAEGAVNSRIVTSVPVRNAV  
NAILRPDIELADAIKECCGGNWRGIVRRLWPEARLVQTIITGTMQYVSIIDMLTDGLPIASSLYASSE  
CSSLGVNLDVPCPASEVL YTLFPCFA YFEFLPLENRLSAPDEDQGREERSFVSCDNLVKLADVKGDEYE

LVLTTKAGLYRYRVGDILKVVVKFHNDAPQFAFVRRAGVLLSVDMDKTDELELHKAVTQAWNRHQEHSEIR  
LVDYTSRVDLSSQPQGHYVIYWEAFDPDPLPELDCVCFEELSELSVVYRRNRREGSVGPLEIKLVRQGTFFD  
RIMDHVVQNGGASYGQYKTPRCAKDPKVVSILESSVIAKGQARCMQTST\*

>Selmo1\_31681\_gw1.1.787.1

FERACENGASVQEELLAGILRKNASTDYLQKFGSPQTPAAYKSQVPIVSYEDVAGEIERIASGDESPVLC  
QDPIICFFASSGTSSGKHKIIPVTAENMSATTRAIELSSAYKARCFPELGSGRVGLGLYYCIDQFHTKAGI  
LVGAGTTYTIKNYRNFSSKFTTPYEMIVSGSNWRELTYCHLLCGLIQRDAVEHIESMFAYTICESLRILE  
SDWEEICNDIRTGSLISGKVTHAKLQEAFAARLILDYNELDRVRNAEAITKICSRKSWSGILSLLFPRAKL  
VSTVVTGGMAHFVPLRDYAGVKLPISGKDYSSSEGVLGINTNPASPLEEVVFTILPHIMYHEFLPLGAN  
NPAGEILAPHEVVVGQYEIVITNFAGLYRYRVGDVVKVSSFFHGVPLAFSHRKNVLSVQNEVMDEQE  
LQNVVMEVSKAEAGIEVANFTAYGNSTAVPAHYVIFWELKRREGINRELLERCCSSIDRSFNPGYTGKRLD  
EVIDSLELVIVKEGTFERLMEEAVRNGTSPAQYKTPRCV

>Selmo1\_403890\_fgenesh2\_pg.C\_scaffold\_1000727

MVLSKGSLSNEWLRIPNNHAMMKNAVLSVQNEVMDEQELQNVVKEVLKEAGIEVANFIAVGNSTAVRAHYV  
IFWELKRREGIKRELVEKPGKSSKVPSPVLRANERTLKA VLKTIIEEAGNLVAYKALLSLRMENGEEL  
ALAMEKDGEDDSQVLEMIHAAIKKALQLATLRCFSARFLRLSSSGGFLPGEADTGSRAVRGTDQGRSDFR  
PYLRQVRGSYGARVREEKEGKGLASMQPKLTMQDKASKGKENKSECASKWATPRAGFPGLWGGLMAPDVM  
DDLQELKALLDQAKRPLKSLLSAEIASIGLGDDESSLRIYLGIEGVSAKDVSSKFRDESQWGRRTGG  
FKPDEGKNSTAGIMDLTKNMYDEGDDNMKKTIAQAWTDARRTVNPA\*

>Selmo1\_416246\_fgenesh2\_pg.C\_scaffold\_30000007

MEALINEFEDMCRNAAAQVEEVLGNIVEHNASCEFLQSYNVTDVDSFKAHVPVVG YEDIAAKIQRMDADGD  
PASILCKDPVIAFISSSGTTTEKRNAPLTTKSCDVKNHAMYKIAAAAYIERDFPVGCFPTALAFMYALPC  
GTLKSGIPIMPVSNFAFTSQA YKERPSRSTSPDEVIWGPWWESTYCHMLCGLIQRMEVDYIISFFAYTL  
VYAFNMLEVEWRNLCHDIRTGKLDKRVKDVKLRAAVAGVLHEDPDSAGFIEEVCSSKESWDQGVPLQWLP  
KAKYLHTVVTGGMKPYVPALRKYAGGVHIGKAYIGSEGVYGINMDPTTEAENVVFTLVPTTLMEFLRL  
RDNKLVDSNNLEIGEYELVITTYSGLYRYKVGDDVVRVSSFFHQSPQMAFEYRTSALLSVNLDVTSEQL  
QNVVRRTCNEANLKVDFTSQSNQTEQPGYYVIYWELKNKPDYSNHALLNRCCDVLDRSFTSSTYIMGRR  
SGTIGPLKLVILERSGFRIMEHAVSNAPSAPQYKTPRCIKSPKVLKILEEGIVSTYRSSKYPR\*

>Selmo1\_421384\_fgenesh2\_pg.C\_scaffold\_51000116

MTWTLIIQAFAMRHTINVFWLMEQDELQPF AEERCSMPGTYTTASHPQARCLHGAVVLDQKKYVVGGR  
CEDKYLSDALQVYEFAMMLVSPCNDWRLEVVTRLPYSGEDFHGRTLDDVYTFDLETKVWERGSTSGM  
RPPGFCFHGDASINGNYLYLFSGCDNKL YMLDLKTVSETRFLKAQELIVAVAQKRWSAPMEFPAAPTS  
IAWLLDLGKNATSLVGVSLVHAKIKDYACLIASGGDHGQLSVFKLDTMKSYPATPSKADLPSYCRVDRD  
DSVVGTVSVSEGGKPVADVAGAIELLTGQAGLLQRNGVALTRGDLVYPGEELEFYEVLKPGNMDLHRMNL  
AACKHFLSRINIKVMRGEGLVPLMEFDAEPFVWTWNVSRDAAMNYLWRHGVPRYSMLRVHYVVNSDREH  
EIEKTAQFCINKATVPPFLEIDYSKTQDLEKCCVDVHNPEYTRKGMGDLINSFELVIVKKGTLARLMEE  
AVRNGTSPAQFKTPRCVASSRTSEALNS\*

>Selmo1\_425963\_fgenesh2\_pg.C\_scaffold\_79000028

MEALINEFEDMCKNAAAQVEEVLGTIVEHNASCEFLQSYNVTDADSFKAHVPPVVG YEDIAVKIHRMTDGD  
PASILCKDPVLAFISSSGTTTEKRAFPLTTKSCDVKNHALYKIGAAAYIERDFPVGCFPTALAFMHALPC  
GTLKSGIPIMPVSNFGFTS\*

>Selmo1\_427552\_fgenesh2\_pg.C\_scaffold\_92000015

MEDFEAVCKNAVQAQEEALVQILQRNGSCQYLQRSGQPLCLKSFKAQLPIISYDNISPELQOIADHGTS  
LLGCDPILYFTFSSGTSSGKHKILPQTNCGYSLARAYASSNA YRDEIFPLESTKPIGLHFVYSGEYK  
AKSGLLIGAGSTNYKSEA YNQE AETLATPYEALLAGSDWQQTTYCHLLCGLVQRHKIEFIHATFAYTSL  
EVFRLLSNWKILCEDISARRVSEKVTDEKLRVPVLKLMERELRGKDSSQVAREISEIFIAGTESRWG  
LLPLLWPRAKYVHTVVTGAMEPYIPVLKKYAGDKLAI VGFYDASEGYLGINMRPATPPPEEVVFTLIPY  
MFFEFIPVDPEEVDHKGTELGFKDLQVKGQYELVVTTFEGFACPLEIANFTSCADFTTKERPHYVIY  
ELKNDGDNRSRHEELRDSNALDRGFNAAYLTGGVDKTLGALELVTVKQGTFEKLEMEKAIESGALASQYKT  
PRCIKSPALLELLDRGAIGRYTSSSEDISSLLAEDWKPSVIHGL\*

>Selmo1\_432454\_fgenesh2\_pg.C\_scaffold\_33500002

MEFLGKLRREIRRELWEKCCSIDRSFNPGYTGKRLDGVDSLELVIVKEGTFARLMEEAEWNIASAFQM  
ASIAEFERACENGASIQEELGGILRKNASTHYLQKFGSPQSLAA YKSQVPIVSYEDVAGVIEKIACGEE  
GPILCHDPVLCFFASSGTSSGKGIIPVTAENISALRRAAEISNAYITRCFPELGSGRVGLGLYYCVDQFH  
TKAGI WV GALTTYLIKTYRGPFNKFTTPYEMIISGNSWRELTYCHLLCALIQRDAVEQIDASFAYIISEA  
LKILQSDWQDICKDIRTGSLSSGKVTHPKLQEAFAFLVNKENLAGTADVIKICSRRESWSGILSLLFP  
AKLVSAVVTGAMAHFVPELRYAGGQASNLRRERLLV\*

>Selmo1\_437924\_estExt\_fgenesh2\_pg.C\_10460

MAAVIADFEQSKDASSNQERVLGRILDDNSSCHYLQRYGSPQTLAAFKAQVPIISYEDV GSEIDKIASG  
VQGPLLCSYPILHFFASSGTTSANGKIIPVTAENIAAASGRATEIANA YRTRCFPSDNGIILGFFYCMDQV  
ETKSGLLVSAASTYALKGERFKATSSKYTTPYEVLVAGSDWRELTYCHWLCCALLQRGKVEQIISIFS YTI  
CEAIRMLRAEWREICSDIRAGSLCEGKVTSPNLRQAVLASPVDFGIKGGDPVEAEVISEICSRDSWSGIV  
LLLFPRTNVMSTVVTGSMKLYVPSLRDYVGDQVPIVGLDYFSSEGAIGINADPRCHPERVVYITMVPALY  
YEFLLPV DSTCDNILGLHEVQVGEQYEVVITNFAGLYRYRIGDVVKVDSFFHEVPRLAFSDRKA VLSVH  
NEMVSR\*

>Selmo1\_73348\_e\_gw1.0.2036.1

MENEQLLEKLESSSWSPGEAQDKVLAIELEKNAATDYFNRHGLRAATKEVFRQAPVIEYEDIKDEINR  
IADGEASTLLSANPITDMFTSSGTSGGAHKLFPKAEGHYAVSDYFFDLATALLNRYSDLPGLRTGKALYF  
LYVRSGRKTPGGLPAYPALTYGYNSEPEFRNWLFDPSNDYTSPEVILCTDSVQASYCHLLCGLIHARDVT  
KLGCFASALVRSIRCLEAWWQELSRDIRTGTLSERVVDPAACREAVEKILRPDPPELANVIDEACLSGLK  
GIVRKLWPSAKAIDTVVTGAMEQYVGEVDYLTDLGLIASMIYASSEFFGVNLKPLCDPSQISYMFLPET  
SYEFPLVARSEEKASREEPVELVDVEQGHYELVITTNAGLYRYRMGDVLRVEGFHNKAPLFSFVCRNR  
VLLSIDSDKTDEKELQTAVMNAFAALRNGVTSKEGEAIRLTDYTSYADLSSNPPHYVYIWELSELHLEP  
EKAGECCYKMEESLVVYHRGRMERSIGALELRLVTPGTFNRIDDAASRGGSVSQFKLPRCIKKNATRM  
LEIVESGVYQQYFSPRAPEY\*

>Selmo1\_74871\_e\_gw1.0.2042.1

MDETAILSAIACDEQALGFMEHVTRHVSSVQDYVLQLLLEANAGTDYFQRHGLHGIPKKEFRLLPIT  
YSDMEADFQRLADGDESKTICAAARVLEMLTSSGTSGGKQKLPKSPSYDQEFVALNRVARAALNKKAPYA  
SRGKSLQFFYVRKPGITSGGVTTTSGLSGYFTSPAQRKLDPEGYTSPDQVILCVDYQQASYCHLLCG  
LTQSQEVVSVIGAAFASTLVRSLKALKDLWQELCVDIETGRVNDNIVSDLSVKHAVNALLKPDPKLAALVR  
RECSKSNWRGIVRRLWPRARIQAIVTGSMMQYVPAIDFFSDGLPIASSIYASSESTLGVNLSPVCSFY  
DVRYSPPFCFVYEFPLVSSSSSSSPSRDDLQVLAELVELGREYELVITTRAGLYRYRVGDVVKVVGFKNS  
MPQFSFVGRAGVLLSVDTDKTDEVELHTAVTTAAVMMAKRNRGDVRLLDYTSRVNLSQPGHYVVYWELS  
LDAAMESMEALRKCCSVMEESLSVYRRNRREGSVGALEIKVVEPGTFDRIVDHSVVFVGGQSIGQYKTP  
RCARDPVLRILESSVVESSRAR\*

>Selmo1\_77060\_e\_gw1.1.1309.1

MWVQCGDLSDFPELGSGRVGLYYCGHQSHTKAGIWWGALTTYLIKTYRGPFNKFTTPYEMIISGSNWRE  
LTYCHLLCALIQRDAVEQIDASFAYIIEALKIQSDWQDICKDIRTGLSSGKVTHTPKLQEAFAFTLVN  
KENIAGTADAIAKICSRRESWSGILSLLFPKAKLVSAAVVTGAMAHFVPELRYAGGKLPISGKDYSSSEGV  
LGINTNPASPLEDVVFTILPHIMYYEFLPLGANNPAGEILAPHEVVVGQYEVITNFAGLYRYRVGDVV  
KVSSFFHGVPLAFSHRKNVLSVQNMVDEQELQNVVMEVSKDAGIQVANFIAYGNSTAVRAHYVIFWE  
LKRREGINRELLERCCSSIDRSFNPGYTGKRLDGVDSLELVIVKEGTFERLMEEAVRNGTSPAQYKTPR  
CVTSPRMLILESSRAESYKSGEMPSSVLESWEPSFPQGRQKN\*

>Selmo1\_85812\_e\_gw1.7.905.1

MHSICLKSMEHATKNAAVIQRELLQOILEKNAGTEYLTRHGLDEESNLVDGFHKLPLVEYNDIEADIKRI  
ADGDTGRILCSDPISQFFISSGTTTGRSKLIPVTKEANRFFRPPLISPAWHRVFTINPDETYLAFWFAS  
KQSLTKGGFKAETVTTSGLNSAHFKRAAASFVTPHKIFQSTSMYQCLYCHLLCGLLRREEVTVVISAFAF  
ALTEAFRVLEQVWSELLEDIEAGLSRITDPIRLAMSGIAPSPPELAEQLRREFRSFMDGIVQRLWP  
NAKSVVAVTTGAMAPYAPRLRALAGKTPLVCGNYFSSECLIGINLSPASSPATFTVNPEFAYFEFLSYHD  
GETKLNGLQEQRVPLTEVTIGEKYEIVVTTTRSLYRYRLGDVVQVAGFFNNSPSLRFRRNVMSVAT  
DKTDEFELQAVVHKASLLLRSSQLHDFAGYADFSSIPGHYAIFWELNHGGSMDPSTLQDCCCELLDVSLN  
DPYLRGRSSGAIGPLKLCVVRGGSFRELFEQHVARGGSGSQYKSCRCVASKQAIDLRRNTLQALSSKF  
PNPWKLSIKSLELDQ\*

>Selmo1\_93250\_e\_gw1.14.134.1

MDPALFRDDIESKTKDAAAQANLLSQMMELNGETEYLRRYGGRFDSLPIIEYHVDVADEVQRIANGDTSP  
ILTAEPVVRFFKSSGTVTGEPKLPATSKSLELLFRPVMYMMESDVCLGFLFAKPENKSPGGLPVSTTSS  
MFFKVQGENLEKMFSTPMKLLAPDINQSLYCQLLCLIRSEDVTQVFAALAITLVEALRLLEEAWSELA  
DDVQTGTLNSKITDPTLRSSLSLCLRPNLKLAQSIRKECTADNAWCGIVERLWPKTKVIVITTTGGMAPY  
APAVRKYGGSVPIVSGDYVCTECVLGFNLDPFCPPESVSFTIHPEYAYEFLHYQKLTGSGTVKLVVVK  
VGEEYELVYVSTWGLYRYKVGDIVRVTGFHNFSPNISFVHRLNAELDIAGERSTEAELQVAVQKSQHCLP  
ASQELVDFTCHQDQRYLIFWEIKNGDSLNPIMILETCCCVLDTSLTERYKQRRENLIGPLRLCIVRGKT  
FKALQQYSLEKGINPTQYKTPRCITSPEMIAILQAGITQDCQTPA\*

>Selmo1\_99818\_e\_gw1.22.347.1

MNLEHKEREKQALQFIEKVTSAAEVQSAVLSAILERNAHTEYLKRHGLNGRDTKTSFRQCLPVITYEDL  
EPEIQRIANGDTSPILSAHPISEFLTSSGTSAGQRKLMPTISEEFERRCLLYSLLMPVMNQYLPGLDQGK  
GMYLFFIKSEAKTPGGLLARPVLTSYKSRFYTERPYDPCNVYTPNETVLCPPDAHQSMYQCLLCLGQR  
HEVLRMGAVFASGFLRAIRFLETHWRELCDDIRAGGLNELVDAARRAVLALMPRPDPALADDIAEQCR  
KESWAGIARLWPNTKYIDVIVTGTMAQYIPTLDYYSGLPLVCTMYASSECYFGINLQPLCPPSEVSYT  
LLPNMAYEFLPIKPKSGKSKAPRVPDPSELVELVDVKMGHEYELVITTYAGLCRYRVGDILRVTFGHNS  
APQFAFVCRKNVLSIDSIDKTGEEDLAKAVRSATAGIESSYGARLIEYTSYADTTTIPGHYVLFWELRSS  
SPIPKDVLEECCLAEESLDSVYRQGRVSDRSIGPLEIKVVKPGTFDQLMDYALSRGASINQYKTPRCVK  
FTPIVELLNARVVSSYFSPRLPKWSPVRPQWANSNGVH\*

>JAR1\_AT2G46370.1

MLEKVETFDMNRFIDEFDEMTRNAHQVQKQTLKEILLKNQSAIYLQNCGLNGNATDPEEA  
FKSMVPLVTDVLEPYIKRMVDGDTSPILTGHVPVPAISLSSGTSGQGRPKFIPFTDELMEN  
TLQLFRTAFAFRNRDFPIDDNGKALQFIFSSKQYISTGGVVPVGTATTNRYRNPFKAGMK  
SITSPSCPDVEVIFSPDVHQALYCHLLSGILFRDQVQYVFAVFAHGLVHAFRTFEQVWEE  
IVTDIKDGVLSNRITVPSVRTAMSKLLTPNPELAETIRTKCMSLSNWYGLIPALFPNAY  
VYGIMTGSMEPYVPKLRHYAGDLPLVSHDYGSSEGWIAANVTPLRSPEEATFAVIPNLGY  
FEFLPVSETGEGEEKPVGLTQVKIGEEYEVITNYAGLYRYRLGDVVKVIGFYNTNPQLK  
FICRRNLILSINIDKNTERDLQSVESAARKLSEEKIEVIDFSSYIDVSTDPGHYAIFWE  
ISGETNEDVLQDCCNCLDRAFIDAGYVSSRKCKTIGALELRLVAKGTFRKIQEHFLGLGS  
SAGQFKMPCVKPSNAKVLQILCENVSSYFSTAF-

>MicpuC2|56528|EuGene.0000030682

MRASLAAA VLLAVLASSAVGVGADHPRTVSRTPRFKTFARPSRAKAWVPEAHVFANKTRDTRDVLGDVLA  
VDGYTALVVSNDQLPSLAPISSTFTIAMSFLHDDLNVASIDAHRGIFWKGGASGDRTPSAWLPYSLRK  
TYRVTSSAEVYWGTSAAALPTRRWHLAFSVGDADRIMRLYVDGKLDSAVEIVGEVVANDGPLVNGKDAH  
LTGINAFIASVQMHAAHEDEEDIAQAAAHALRAAPDFDGEASAEARAGADANREARERHHRDGDFAFASLL  
SSLPMPMHARQAAAMTSSARAEMEVRTSQRARADAIANAEEKEKMARRLFIDAEYSRGGIALNDAMKSEN  
NAGGTYRTRGPREGLAKAREHYLRAAAMGHDKARYALATMHLQYGGPISHGKALYHKLRAAAARGDPG  
SNLAVGSAFAAAASAAASAGGGGGEAACRVAEYLLHAANVAYDNSGKPGGQNRVERLRLYEGVEKERQD  
HKGPNQKQVYLVQTAHGDALASLAMGNAYYWGNGFLRRNFQAALFYESAHAQGALHGTVGAKMNLK  
GEGLAGGVKNVSRAMEMEYEAQRDSDPALNGLGYIYFYGDADIEKNTTALSIFRKAALGNADGHMNS  
GLMLRAGIGERANLTAHEHFSVCAKARHTSCYIQLGMHSEGSIPGAERDCFAAAQRFRVAQSGEWME  
PLSDGLKAHLAGNASLARWYDYVAGFGMPVARYNAWLHTIHAREIRVALESPARDSGRSDSDLEAI  
ASGRRSAGLLSYASEMTKDPATLTDRA YAAMLQADCLYHGEESRPGARCARRLPDALAAAYERAGRIAR  
VAARTSPNRNGDDGESGELRDGDARLLARALYSEAWMRARGECAVDRTRAKAAALWSALAEGRWQSSLA  
VAPFVAVFVAEDAFRVLVPSRGRGRDGAADPDIAIRASASVTSGLASRLARRAAAPWRLTARVVAA  
VMATSSGLFDRFEPVLASWVATPPVWLIVGAYALGWYVVYRCVMAGYGGGEYNPLVLRHRRLLALAREDRWR  
ARLFGGTRARTVEERQQRNDRLIRNLHALHLQEEAAWRTSTPGEMERIRDERLPDIARIIRGEEDDGGF  
GRFTGLMMELGIDAARLEPANRPAATAEVEVSVTEVVETLVGELVAEMEGWGDGASAE\*

>Chlre3|147180|Chlre2\_kg.scaffold\_18000105

MPKLVSGCESIHARGQGLTNSILSPVTLAAISSCLDSGGQVDPVALADLYAAGMTLDLSQVVDPLK  
DQIAFHQIHQFRGSVVV AEGTVSSLFPFGGLIYQMYRRDVLAQHGLDVPATWDFEFLDVARIVNGTDMNG  
DGVDPDYVCLQRPRYCFNGFNLASIWSVQSGGTRQGAFFDPTMAPLTNNSAFQTAMELWVALRDYGP  
PDESTAQLPFNMQFVRGRCALTSWGYQLKANTFLPFMSVNRKVSVALLPGSTHVLDRRTGELVLCTSR  
AVCPYAEELPAPDTNSTSSSSSSKSRVRYIQTGVDETRPTRLVNRAPYLALATVSAAINSASVAQS  
LLSLVFAHSSRNMSWDLVTSPLTELGPYR YEHFDPANLDMWTRQGYPREVIAEFLQVMKAQVDSENVML  
EVRTADAYAYRIMDVYASGSMPPAAVAAMSAELQGFGRSNPRFDLIRHLYRYSIGIITEGGTPPSGGG  
GGSGGSDSNVNVAVTVPVVLVAVVAVAGYAEVQRRKRRRARHSLHKGHGPGV GENTLIVSDVEGS  
TALWEIEASVMDTVFDLHHDCLRRTSVRFGGYESQTEGDSFIIAFHPD DALQFSLAVQQALLEEPWPR  
ELLEHDKCRPWLARTAAEVPLELPFEPAAAGTSPPATAAHPVVVQTPPQPPQPPQPPQPHANGHIP  
NPSQRVQYGGHGRSTGGGNEGIPY TASRLGTPSAVEGTAGPATATAGS AVSGLRRILAWQGSKRVRHS  
LNGTPDGAAGAGSADAAMAAVLASHDGGCGGASTS GAATSDATPGDMSPPGTALDGRGTPSLLPASRLT  
VGDALRAMWREVS VANDPWGGSGNVASGAAMRWQGMKAALSLRPLAAIPNSMSRPRQASDSGISGGAASV  
GSGTPSPRALGSLQVSRLDGWHLAAGGSGGGTGSRRMMAAAAAGPVAEARLLSTSGDSSDGGVVDG  
GAEDIAAAELVGITIGGEGESSGEEGEEVVDVVDAELRARRRAAAAAAAAAARMAPVAAVVNVADV  
AGSTGGVAATAAAASGTAHSVSLARASAAMLGAGHATDAPGNSTHFSFGSRLGSKTFGRLLSALVE  
MAFGPGSEQGAASGAGGATEDSYAEGNTGGTAAQDALDANGTAGSSRRTTLGNLAAAPAAALSAPPAPAVP  
QAMASAPAVTVGRPSSRALPYARSMARSEGTPSYAGRLAPAGSVGVDAAVVSAEQLTVRRGLVRRGL  
MHTGVRHATDLVYSDVAARWKYSGEVLA AAKAVS DAANGCEILLSRTTLDRLSPELFRKAVCLLYLGRH  
VLRGGDPA AAAAAAAAAAPAGLAASGAAAAGAAAGEPAPAPLAPGSAVADLYGAYNARLMGRMGLYRPRTA  
VCTGLSSLEAPLGRAAYVLLVSPGLSAMA AHS DGCSEVVLEAQAALGSIAADQLQACSGVPAAPGAGLGG  
GGGAGGGGMMGGGGAEMLAGANSAGVVGGGAAGTVGVFSNYPYQILFALQAQEDLLNHPWSSDLLTHE  
QFEIAMPAAAAAAMIGDASPKPAPGTPTAAAEEAAAGFARASAPGDMSPRADPQAPALPAALPHAS  
SSSVFATVAAATSGDAASTGRLHAYAPHLQPMSRTPSRLQSAATGAMAAAAATGAASSLIPLTAAAA  
PAAPPPGSTAFDAASV GASVPAAPNTAHTASAPAAA VAMDGDVGGGSLVLFGRGPRIKAAVTVYGVFKA  
FLDPVSGRIRYDGKPAQAASKIVSYAAVGMVVASVEAVDAGHADKQEMLVNPMPDGASHGLGLPHSYG  
AADPRANMVSTGLLAPGYS D A GSGALGGSGALGGSGAAAAAAALGPSIHSPLSPDRDQSASRLR  
AIDANAAAASAAAAA VAAQYEA SGRACDDPEGPNA VAAAAAAAAAALLN LAPDGGGV LARSRSVSLDVA  
GIRRLGLGLGGS VNGGSAASAAAAAATSVTDDAASMT RSDSIAA LALLSPTGSTRPHQHQQHRHQ  
YQH HHYQSPYPHPQYHTHASAAPRPVSDLEIDPYRSSNSEPV APEGRLIIGTSA AAAAAAAAAAGSNG  
SGAVRGSASGESTPHSISFQY AASLAASLAGERAASGAQQAARRVAAGAAGAGGSGAGAGSGGG  
AGAGSGSISVGGV LAAAGLSP LAKPDSRQVRSAMPV LAAAVGAMPVLPSPRQRQPLSDTEGSDDD  
APAGGQLLAAGLERAAGGVRAGEGEGEGAAAEPATFVTTSPLAVVSA AVAVAGAGSAGLSGRPPR  
PRGAPALSVPDSD EPHAAAAA APPAAAPAVAAAAATMAGVAAALATLPPEPSRMDPTHVGLLESGADL  
EAMLPPPDLPQSPAYASRMVNNGTASPATASPEPQPQLQQRGSRVRLHHEAASA ALLPPEPSQAALT  
SASPQADA ALLHHLRSSLGAASAANAVAAAGTTAAGLSLAVPQDPARWPPSRGNSMPAAAGPSRLK  
RNASASSAAMVRGGGSLLPVALRQASERMVRP GGAGAVAAPASDVLAAPILPTLGEVPGDAE AAPAMRAL  
APEVLLGAAAAAGAMWPPPGMVSALAPHG GARTEGSLIAFAASGAGDSNGGDVSGTGTGTTGGGSE  
SQLAGAAA VPALGRVQVGS PRRTGSMGSGVNVSRNRATPHHPQP MHSSQRLAYAVSPA AATAAPGLM  
AAGAISAAAGPLSGLLVGLWYPVPAAMLAAGGGIAASIGTGGGGVGAQWHPD ATPSVRLSHQLEAVGM  
DEVTMIPVALRKRANSOPLV VYL CRFASGQRAAEVQRLVSMGRGDPTAAAAAATAAANAAAARRTATA  
AAIQAANAAGDNAGGPGALGSDAADAMLGPMASQA YLPPMASPLPHTAGERTGERSKLSASVAALFS  
GGGAGGAGGRLSLHSRMPV ASSTADGGGRPPASMFPRASLTSRITGQPLPSDLGRRSASVAGMIQT  
EGGAAAAAAVTPGI ELLPLAQLTAAAVAQAVGAAA VGTSGAPSRSGGGMFRRFRASL DMSQQPVKCR  
HGRSTAYGAVESVGEARTMSVKRVQRSTAGGISGLPHMLLPAMRGAGAGGAVS AALPQLPYFGA VAP  
QAASHY AHSSYSTSGMLCHGAGAPALGPLTGASLPASSVAVAVGPDAAGPTHAVHVRS LAPVWPMC SH  
GGSM PDETGSAVYSHPGAAAASGLALS AATATTGGAGAGSVGGTGGSAVSLAGYASSTQHSDSAVPVGS  
GAIAAAQAATAAGGGPVA VGGSAALGTGASLSLQQILV LGLASGSNAVPLPSLGGGGMGSAAPVGGMA  
AGAASDADTAGAAAAAGSGGGGGLHGPASSRHMQLPWQEHGSLGPAGGGGAAAGMYMLLPAGIRTGTA  
RVPPQMSMMTPTVEEHEECLD

>Volca1|87153|fgenes4\_pg.C\_scaffold\_4000288

MHRADAVMDGIAGPMKWGAAGAVVVGATAGGVVGPLGAVAGAVAGAQAAATMAAVLDPSTGRIHAAAADYR  
TVEAPVIGPRPGTFETLEPQYDDSPPTHPTQPPTHPPATHPPGSSPSAGQQQAAA TPAQAQAQAPAGS  
QAAVNQSLKSLSANENAVQATLLKVTLIQKFAEGRSERTTPVQAVRRALNLV TADCRAKYASVSVLSE  
TQEHALLVTA VGVPDTVHEGNRLKVP GSNSSAERILQKATDFFYWQPSASEAPAPSDWATLASAAGLTY

IAAVPIKVS DKVIGTLTVGFGDAADEADYIMFPTYLQLVAASLSSMVKDNSIPKYM TLVKDLHETGDLD  
SLMHKVVQHLR TLTVLGHSSNNHHIWRIGL TAPNNTASTIFDDLTQR TLSNPTGSSSFKLLKEVQAAGGVMR  
TVVAMKNTVMKIAVHNRRQQVMIPDVQKVINQSGNVSADIFNTRLIKPPTS VLVFPLKTMQTASLTQTAGG  
SMMSEGGMSGILTGAGGSIGRSDSLGVSLSGDSFMYTQSRSTGALVTGLTEKLNQKRIRSSMDFHNT  
TMTDLQITGLLGEFFAKVFRGLWRGLVVGKVVVCDGKNEKMMVKNHEIAILSALSHPNIVQLNAAHG  
PYVDLLDAYNCLTDVLRD LNTTVHRYNIPSVLNSPAYKYLLT MEDKTC HLEVEIYCDLGNLSNALKNN  
IFMIPNPVIAAAAGAGDGA AAAELAERARQQPMKASAGPRGGG VWNMRTLLLTLIEIASACGYLHRMGV  
VHCDIKPADVLLKSSNDFRGFTAKVSDFGLSRVEDDDTCASFNFSCGTAAYVAPEALICNKKVNSSD  
VYAFGILMWE MYTGORPYGNMKQQQLVEEVVMRGLRPFPGTAPAGYV VLAQSAWSGSPQARPSFDEILT  
HLNAMLQVDDREMDSMAGGSFGSMEKFEYMQQQMQQQQQMQQQQQGMLTPGSVGGGGAMDRRPSQVSR  
RGVPGGPMGAVPQVPSPMHGASPRTTGGGMQGGAVPSVSAVSSTSAGAATLQAAAQGGVSWLPNGGWE  
VCRRRYKEGVFLKRCRLSGYRCGGGGDGDDELLSPVACVSMAPLAPILYWECHPLLRYADRLSWRHSPLP  
\*

>ChlNC64A\_1|137142|IGS.gm\_18\_00248

MAQQDVLVFLSRLGPAEFSLDQPTRFQLAQDMVPDLSLAAQRSAMPALAAAGGFAGRSFAAIIAACNYS  
DA  
PITLVGFKAE LSTERSRLALLHDSAASPLPRLAAGQRHDLLVKHDIKDLGVH TLTCASFTCGEGERRLQ  
AQAF TSSLNPLVVR TKQRQVGEAVLLEATLENATKAPMLLDAISFFPAPF AAQRVGGGGASSPPPPA  
AGRAGDEPAGPLSSYIQLPLIPEGGASAF L FHLTRL PAAAAGSPGGAMPGASPGTSPSRAAAAA  
AAAAA  
AAAEASGALGKMEIRWRGPMGEMARLQTQQISLPQAQREVSLALARLPGRVAVGAPFTATLRVQSHVDR  
PVGPKIAAADAPSPAGSPSRSSSLRASSSGSPSRDGLQGGAVAAAAA VCLDGAQSVLVDLAP  
RQAVEVQLRMLALAAAGQALPAMCVVSRDGGKQY GALPPAELFVDSA\*

>ChlNC64A\_1|144567|IGS.gm\_7\_00509

MEDAAAIGAAFGSQHIAEAAKALRDLPLGLLFRASVRCGTGLFV SQDLLQAGSNELSVVSLKNSLAG  
VAMAQGR TVVVAAPATSQAAPSAQVLCVPVAVAPATAGGSGRGAPPEAAAAA SAATSTAAAASGAQYRP  
IYV GALMAGVADGGGAPPQLWERLQALAEAPPYFLLGLTKAADMAEMLKLRADCCCAEDELQDMPL  
SACTPRSVSPGGGGGGGAQAEAGGGCGAAKKAEEAQAQTLHAAA VAALSQRSGTLGSAGPAAAPAA  
AAAEAAADAPSSSGGGLKGA PLQGLPPGAAAAA AEAEEAEDPKAQLKRRQAAAAGTAAVSAARPPP  
PAGALLRYADGALEARFAAAHNASLRRGDLLFSLMHL SVALCFV LQPGAALRSAAAQAFVAALAPLAV  
MALDASRYTRHREALLASLLL AHALLRWSGAAQAAPPPGAAQALPWLRTSGAEALRFCLFLPVQALC  
LSVLLAPLAAACPAALGAQAGACLLAGGGGPMALLALVGLLPAAA VYKFEARARRRFEQATAAQEEVA  
A\*

>ChlNC64A\_1|143846|IGS.gm\_6\_00420

MRTAAPWMPLLAALLAAAWRPAAGAAPQASDDARLRLGHQQQIRS VADLQRAIYTEMRMSNTQSGGD  
ACVRLTASGTGCAAGRAAVQGRLLRLEALPPDADDYPDGTALLPPSLLADFLDQCRASPALLRRVRG  
VLVEPGPAPAYSQAAAAPLADFA LYPGRSYAWNPA GRGLAGMDL PPFIFLLDDATAANAALRAAE NEQRR  
TNGALHHARMQLAMDAAGNSSACLAAGTCLPLGGH SVLAALPPLPGGGGEDGLPALWLLSQFDSAALFHE  
ATAGADAPMSGLIAMLAAAQLLGSYVHGDG SATARAPFRRRLVFAALGGEPWGLMGSKRLLWELHQGNAS  
AAGLSLAEGRVAGVLEVTQVQARQGGGGDTVQLYTHTPASGGPAAAE LLAALQAAAAASQPGGVVALS  
PASSAAPGLPPTAVR VAGGGGGGPPAVLLSFGDAAFRGATFQTQFDSLETVDADSIAAA AVV  
ARAHSLSALSDGSASGGGGGGGGGEGQQAQPPLVDYGA VKETVQGLMQCLLNASVGLNCP LAAA VMSP  
VRGGHV AHYLGILHPQTPDAMVKS DTERFIWNFLAFATAPGAAPGAGAAAAA AAAAAAGDGGGGGGPGL  
QRCQPLNATACPPGLVCAGRSIRGPEGLGVCLNTTVRYVPSYSTSLLCSDSCDGSRTLYDQRWRLTDA  
AA  
AWEQQHGW PADPVWTESNWRPGTPALTYLREAPGVDGALLAAGLAVAAA SFGGTLALRAAYRRKLRQ\*

>ChlNC64A\_1|135335|IGS.gm\_13\_00263

MGAIAIGRKHNAALVQRSGLPRLLSARSATPGRQGGALVCHAVAAPPAVAAAEEKVLSTSRFDDAGI  
TMHVVKRTQPTGASGPAVS YC VEV ASDQPRPQLVLHWA VNDWALPAQDCWPPGTNQAQDKAVQTALSDGRH  
LTLTFPEDTCPGRVVFVLKEGEKWYNSGGGDFV AHLKPPGVDEVLEKVLQEESQNTHWSLFNRFVMAAQM  
LDAADAAGPRGMGFFFTWLR LSTMRQLDWYRNSNYQSKDIAHVQKHLAERMAYKARTADDPLCRLFARLT  
LAGLPRGGWNGDDIRMGILNIMRANGIKEGHRPGIEDHFLEQWHQK LHTNTTPEDVTICEAYLAFLHSNS  
MDEFWRVAVGERSLTERLANMDHPITGYPCHLPHLIDPFKHYLWILKTT HSGADLDTSFMTAQQLLDGD  
LAWNIGDMLKNRGEWVVPKIVELRHRLKPYWQAEGSSRDILLDIALDNYFR LCVERTDKGALSGDDLL  
SLAVLVDNASVSAESAELDQCLALWRRLQEDGAAGVLLRFLDPMLRGAAGVGSWQV ASQGRAAAGGLL  
TVMADLAGIQRFDPEQVIVADKLTGNEDIPEGVAVLTSSTPDLVSHIAIRARAQGVLLATCFDAEELDA  
IKGRAGGHVSASVTPTGSVSVAAA EAPAGGAASGASSAPRLTLQR PQSVGGSGSWVLAESEFGPVVGGK  
SANLAALRSKLPAGVQAPASIALPFGTFERVLAADCNKAVAAA VVAEEQQAAAAAGGGEVPPALPSRLSL  
ISADLAAPAGFAQAVAGAAAQAGLIPSAEWAEGSAGWEAAWQAICQVSVGLM VVVVLGGQRGELHGEMV  
VGMGEALVGNYPGRALSFAASAGAQPQLLSLPGKREGLFAGAGVPHLIARSDSNGEDLEAFAGAGLYDSV  
PPFALEHRAVAYAGEPLLWDGGLRQSVL GELVQLGAAVEA AFGGV PQDIEGVRTADGSTFVVQSRAQVLH  
QH\*

>ChlNC64A\_1|144734|IGS.gm\_8\_00062

MPPRRQEVSSADSDDDFGSEPSDSEEPQKKEWNTYQCACGSFEFEPGEAPWRCSACPQQFHRACLTGK  
ERGSAGRPGARWVCLCARHERLGRGIDAILACRGGGTGKEYRIKFAGRSHLHTEWVRVSELEAAAA LFP  
GLRLRLKTFEKKRAAALLTQADDELVEGVKPAWLEVERVIAERTVSGGGGAAAGGGDGGGGGGAGGGAG  
GAAAAAGAGAGDAHEGGGDAAVPPRLQYGOHKQYLCKWRELPYSECTWEEESDISEYRHLIQYRQRPV  
IGEIQQLPSPAPAGQQQAQQQGEAAAQTGAEEAAAAGWWDGAGPDGGSQGGSQARRFAATPAFLGQL  
HPYQLEGLNWLYQGWKAGTSLILADDMLGKTVQAIAYLAALSHEASSVAARGGVGPPPLPHLVVPLST  
LPNWQREFARFAPQLNVVALTGNAEARATIKEYELFGRGLGARTIQAGGGQPAGPAAARLFQALQSLRCR  
HRVLLTGTPQLNDLSELFMLLHFLPQRFD SLEAFQAFDDMGHEEQVARLHALLRPHLLRRMKADVLRQ  
LPPKKEQIVGVELSGSQKQVYRSILTHSYESLTRGGTSKLNVM MELRKAVQHVVYLLFHPPTPRPTGPPW  
KLKPGHRVLIYSQFLLMLDVLEWYCAARGHSYLRLDG SVGTAERQRRIDAFNGQPSRYFLFLLSTRAGGL

GINLATADTVVL YDSWNPNDLQAQARAHRLGQSSGMVYRLVARATVEERMMQRAKGLVLEHVVRK  
MKRQPRAAKEGGEAALGQSELQDLIKFGAADLFAPDGAEGKPGWRHSLGGSSLQHRSSSPACAREAEA  
GRGRPVPTSVREQAGRTGGQDGRAIVWTDALDQLLDRSDLSSQPEAAGKPGEEAAAGGDRDILAGFKV  
AHFTLQEQPAEQGLARGESGGGLGAGLADRLAGSGGGLGSGTLGSGAFSLDGGGEPGAGAFWEALLGGR  
YAEQAEEAAAALGKGKRRRRQILDLDQDAALDALLAEGGSEGSEGSSESGHHGAGLHGGHSLGSRSTAS  
DEDYQVGPPEEQEQAEEEEEAEWGRDGLVAEEHERRRKPSTWHHAPAARAGGSGGSGEQRAGAGGHG  
GRGDFVEALSQCALAGAGGGEWLRAAGWPLVQGTGDQLRVWGFTALQRRRCFLGIVMQHGVAALPGGG  
FDWAPMRARLPFKHGREVVEKYGKLLMELVAAAAVPREDGGAQPTGWELREVLGDVCAKDV MARLGLLHL  
LRTTTEQLRAVGSAAAAALPCARNLARPVLHHTLTAWGQAHDVRLMEAVVEHGYGRWEEVLADESGLA  
EVLVARELQALRYPDAAAAGVPPPPSAGRVQRQVYTLMRKRMHGWLESRVTRLAAAALAAEPGAPDPPLLT  
LPLKLSKRRQEA PRGGQPWQGEQGPQAPQQRQEQEQPQARPRQOQQOQQOQQOQQRAAGGGREASAGHAG  
RRPLCPVPPRSPAIVAAISALPGLSPEARAKARLGISELNQYMQALSASIKQETRETHSALIGGCPVDLVA  
AGRRFQEQLRISKCSQRLMLLVQHELGGVEAARRQQAGPQQPQPGKQGPQQQGPQQQGRPQPQRW  
QQQQQQQQQAPARASAWPGGAPTQPPAPAAAAASRQPSGSLPAQTLAAPSAGQSAGTRVVAAGAAG  
AVGVPADEAAPAPQSPAEPFAAHMLREADQLLNDILADDPLEPDRGDLVAELLQEVNAPVVVSPRP  
PRLDASPAAARATAGSAQLLRPPDGGRAAAAAIEAAAALPLGPPADARRQEQEAGLGSMDPGDDTVIE  
ID\*

## IAMT1

>AT1G04600.1

MAASAKVTVGSHVVEDPDDAWIDGEVEEVNSEITVNCSSGKTVVAKLNNVYPKDPEFPELVDDMTKLA  
YLHEPGVLLNLKCRYNANEIYTYGNILIAVNPFKRLPHLYGSETMKQYKGTAFGELSPHPFAVADSAYR  
KMINEGVSQAILVSGESGAGKTESTKMLMQYLA YMGGRAESEGRSVEQQVLESNPVLEAFGNAKTVRNNN  
SSRFGKFVEIQDQRGRISGAIRTYLLERSRVQVSDPERNYHCFYMLCAAPEQETERYKLGKPFSTFRY  
LNQSNCYALDGLDDSKKEYLATRKAMDVVGINSEEQDGFIRVVAAILHLGNIEFAKGESEASEPKDEKSR  
FHLKVAELFMCDGKALEDLCKRVMVTRDESITKSLDPDSALGRDALAKIVYSKLFDWLVTKINNSIG  
QDPNSKHIIIGVLDIYGFESFKTNSFEQFCINLTNEKLLQHFNQHVFKMEQEEYTKEEIDWSYIEFIDNQD  
VLDLIEKKPGGIIALLDEACMFPRSTHDTFAQKLYQTFKNHCRFGKPKLAQTDFTICHYAGDVTYQTELF  
LDKKNKDYVVGHEQALLSSSDCSFVSSLFPPLPEESSKTSKFSSIGSQFKQQLQSLLESSTTEPHYIRCV  
KPNLLKPIDIFENINILHQLRCGGVMEAIRISCAGYPTKPFNEFLTRFRILAPETTKSSYDEVDACKKL  
LAKVDLKGFGQIGKTKVFLRAGQMAEMDAHRAEVLGHSARIQRNVLTYSRKKFLLLQAASTEIQALCRG  
QVARVWFETMRREAAALRIQKQARTYICQNA YKTLCSSACSIQTGMRAKAARIELQLRKKRRATIIIQSQ  
IRRCLCHQRYVRTKKAAITTQCGWRV KVARRELNLKMAAKETGALQDAKTLENQVEELTSNLELQKM  
RMEIEEAKSQEIALQSVLTDIKLQRDTQETKSKEISDLQSVLTDIKLQRDTQETKSKEISDLQALQ  
DMQLEIEELSKGLEMTNDLAAENEQLKESVSSLQNKIDESERKYEISKISEERIKDEVPVIDQSIIKL  
ETENQKLKALVSSMEEKIDELDRKHDETSNITEKLLKEDVDFDYEIVSNLEAENERL KALVGSLEKKINE  
SGNNSTDEQEEGKYILKEESLTEDASIDNERVKKLADENKDLNDLVSSLEKKIDETEKYEEASRLCEER  
LKQALDAEFLRARA AEVKRGGAMFLVCLGRTSVDPTDQGGAGLLFGTHFQDAWDDL VREGLVAEKRDRGF  
IPSRRFGTESFRRSRIERQPHEFVDVLLKCVSKNIGFSGKPVAAALTIYKCLMRWKIFEAEKTSIFDRIV  
PVFGSAIENQEDDNHLAYWL TNTSTLLFLLQRSLRQSSSTGSSPTKPPQPTSF FGRMTQGGFRSTSSPNLS  
TDVVQQVDARYPALLFKQQLTAYVETMYGIHRENVKREVSSLLSSCIQSLKESSCDSSVVNSPKSSEEN  
LPAKSSEENSPKESVLFVLMAGRPSGSSSQFGDQDTRAKHPFTTMEQAWQDLIEEGLIDEETRDGFNI  
WKKNYVPLFLVQKMFSTFQYINVQLFNSLLLEREYCTVNMGIKVKAGLDELESWCSQATEEFVGSWSWE  
LKHTRQAVVLLVTEPKSTITYDDL TINLCSVLSTEQLYRICTLCKDKDDGDHNVSPVISNLKLLLTNED  
ENSRSLDDDDSSIPFDTDEISSCMQEKDFANVKSASELADNPNFLFLKE-

>GAMT2\_AT5G56300

MESPSLPMTAKDWTTTSLHRV FAMQGGEDDLSYVNNSDSQALAITLSKPISSLSIKLFSQDTPIKIT  
DLGCATGNTFTTVDTVVETLQRRY TARC GGGSPEFEAFCDLPSNDFNMLFKLLAEKQKVDSPAKYFA  
GGVAGSFYDRFLPRGTIHVA VLSALHWLSQIPEK VLEKESRTWNKGKTWIEGAKKEVVEA YAEQSDKDL  
DDFMSCKREEMVKGGLVFLVLMAGRPSGSSSQFGDQDTRAKHPFTTMEQAWQDLIEEGLIDEETRDGFNI  
PAYMRSPEEVTAGIDRCGGFKIGKMDFLKIVEYSDEKQEWEKKDPVSYGRARTNLVQAAIRPMVDAYLGP  
DLSHELFKRYENRVSTNQEFHLITCFYGVVVFSAIRV

>IAMT1\_AT5G55250.1

MGSKGDNVAVCNMCLERLLSMKGGKQDSYANNSQAQAMHARSMLHLLLETLENVHLNSSASPPPTAVD  
LGCSSGANTVHIIDFIVKHISKRFDAAGIDPPEFTAFFSDLP SNDFNTLFQLLPPLVSNTECMECLAADG  
NRSYFVAGVPGSFYRRLFPARTIDFFHSAFSLHWLSQVPESVTDRRSAA YNRGRVFIHGAGEKTTTAYKR  
QFQADLAEFLRARA AEVKRGGAMFLVCLGRTSVDPTDQGGAGLLFGTHFQDAWDDL VREGLVAEKRDRGF  
NIPVYAPSLQDFKEVVDANGSFAIDKL VVYKGSPLV VNEPDDASEVGRFASSCRSVAGVLVEAHIGEE  
LSNKLFSRVESRATSHAKDVLVNLQFFHIVASLFT-

>Chlvu1\_83514\_estExt\_fgeneshCV\_pg.C\_120174

MSHLGPHSTVSGMDSSYNLSDMQRQAFEHFWPWLEDAVTQSSSTLLPFQNCSTISYADYGCAGGANSAAAY  
FAQVKSALERAGFLGGDGSSQLQVTLIDVPSNDWNQVSAAFFRPGAVGCAEALPTMVPKSFYAGEVAPP  
ASLHIGISVV ALHWLSHTPPVSLKDSFN YQRGGQSHVEAFRRQFESDAEHFLRLRANEFVPGGLLLL VLP  
GTLGDRYLGEFSALSADAAELSAQGKIDASLLEDFLYPVYMPTEDELFERAEEMVRADPSKYAFKNIE  
VAVLLRRTKRRPSVDIGRRSTE\*

>Phypa1\_1\_143559\_e\_gw1.204.84.1

MKRKTLRMRQGDGEGSYSRNSGMLQGGTLRTIGHNLADEISQLGTLTEVGPVRVADFGCSSGANALEWA  
DLCASSIVRNYHQMKSVPAPEIQHFFSDLP SNDFNSL FRELVESKRPYFAAAAAPGSFHGRLFPQHSTQIA  
ISISLHWMSKIPETVLDASSPAYNKGVWLDSRNP SKAAAYSQVARHDLSSFFTHRACELEPGGIVSMM

CMSRGEHEKPELQCSDEFQEANPGGGLLEQSWEEELIAEGVISPKELDTFNIPVYHLSIEEIKEAIDQ TSA  
FEIKQLEVRDHL\*

>Phypa1\_1\_151064\_e\_gw1.327.25.1

MEGAGDASYVKYSSGQANINAE LRPMLATAIRTYTEFPSSGPIRVADLGCSV GANALGFAECISNAVLEK  
FKSLGLPAPEIQHFSDLP SNDFNLLFSLMPLHKSGEDDWGNLDCREMDTTRSYYAAAVPGSFYDRLFP  
RESLHVVMSTWSMHWLSHIPTSVTDKSSPAYNKGVWINEGSPA V AEEYSKVSKENLKAFFVNRGVEMVS  
GGLLFVMLMSRDKPCRKEIQFGQPLGLGSPICGMFELAWNDLVDEGVVDEDTRDSFNMPICYPSADEITE  
AIDESSAFRVEKLEIWEDIDFLPRATAVQLATNPERWGAMAMNMSKTMMLTLVEAHVGPEVA AKLWDR LQ  
KQVTAHCRRTKT VFCANSPGCNIALAFLVKK\*

>Phypa1\_1\_24393\_gw1.47.108.1

ADFGCAVGANTIGLAKFVTETLKS RPEISERDFLCYFADLPTNDFNTL FNQFPPLASRDGGNGNVEERTW  
FAAGVPGNQFNRMFPRSSLHVAITTL TLHYLPEIPKSITDESSPTFNRCISSHGASPAVAEVFADTSRE  
GLRKFQCRAEELASGGVLA FYPSPDRAPERQMSEDSMQLALWKVETA WRELV AEGVMPEELDFTN  
VPNCHPSKEEVEVVDHETSCFHQKLEYIHKHPFSPNPPELILKDAQSYAKWWTGILRGGLGMLS AHM  
APELTEALMERFS

>Selmo1\_109905\_e\_gw1.39.432.1

MQGGLGEDSYHRNSSLQAQSFKNVQPTIKEIMANN TLLLDP SLKVIRIADLGCSNTIHAIDFVAREIIQL  
RDQKLPFSSSSSLEIQAFSDITANDFN TLFSK VPHLQGEPIYFFSGVPGSFYHRLFPRSSIHFAMTSHAL  
HYISKIPDEIIDRNSTAWNKD TMVIDRFSPPAALEAFARQASDDFSNFLQHRAQEVVSGGILVTMFP IRL  
TQELITVDLTLALEASWKDLIQEELLSQESLDTFNLP IYVRSMEIQEALPEVKEYFKVIYSANFTYPQ  
DPKSWNATAVVKKWKAVLGRAIGQHIGNEELVELMFKRMVAKITTLTIPFEVILLVLQRTEL\*

>Selmo1\_24064\_gw1.179.26.1

MERGTGYTHHSTVQAQGFKDGEAKIKQAMARNALLV DPSLEVIRVADLGCSHGSNAIHAVDFVAREIIEL  
RDLKSSSSSSSLEIQAFSDITANDFN TLFSL VPHLQKGKPYFFSGVPGSFYHRLFPRSSIHFAMTTFAL  
HLSKIPPEIITNKESPAWNKGTMYIDRSSPQA AIEAVVRQAKEDLQNF LQCRAQELVTGGLLVSKFLIRT  
TRDLEGLPHNGFQEA WKDLIQEGLS QESLDTFNFPVYFRSCHEVQDAL

>Selmo1\_24414\_gw1.0.667.1

MEGGSGKDSYHRNSSLQAQGFSSAHAAIEQAIASSAPLFLDSSLDVIRIADLGCSHG SNTIQALDFVARE  
IIRLREQVGD RKP LEIQAFSDLA VNDFN TLFALVPH PQGEPYFFSGVPGSFYRRLFPRSSIHFAMTNYA  
LHYLSKIPESITDRNSPAWNRDCMFVSRSSPAAIEAFAQQASDDL SIFLHSRAQELVTGGILLMFP IRL  
LSHELNEDDFSLQSVWKDLIQEGLS QESLDTFNFP TYVRS GDEVRSLSGSDVQQFTVIHSEN LKFPW

>Selmo1\_403920\_fgenesh2\_pg.C\_scaffold\_1000757

MDIVVQAFKDKLTKSADLPPVPGFLLRCEIRVPGSFYDRLFPSSSIHFAMSSAPLHWVSKIPDAILD S  
ESVCWNGGNISPDKAKPEVAHAYQQGHEDLCN FLKFR AEEIVPAGLLCMLMNARRSKQTLSTGLQLLG  
ARMGGHCHRGDIDRREHPKH FQHALLPSSRL\*

>Selmo1\_406384\_fgenesh2\_pg.C\_scaffold\_5000265

MESGVGIGSYARNSAFQSSDFLVPVPAIRNAIAMHCKSISSTAGSVIHFVSSAALHWVSKIPDAVL DGE  
SVCWNGGNISPDKAKPEVAQAYQQAHENLCN FLKFR AEEIVPAGLLCMLMNARRRFQ TENTSADV VNW F  
TAAWSSWSPREPETLSTCAASIEQTMKSLRQSRKLVLDPPKPAYGEARSRAAAARWEENTRSEAMFLKS  
VSSQLVEKHLSHNDLVEESHKRLERRLLTQEKSLFRHLP MHFSARLLEQA\*

>Selmo1\_414481\_fgenesh2\_pg.C\_scaffold\_24000001

MLCLPCWAEQFFNTAWVVDTRKVGVR IKEDMEPKELRHA AKGNVQLNGTFFWRVRMLGGV GINSYTRNSA  
KQAVGFSLIAPALKNVIAASDFGYDETS PVRIADLGCVSGYKHNPCSGACGEAIRACSA MEPEIQAFFSD  
LSSNDFNTL FQLWRGTWVIGVVHSRRGMKPLWCKLMRIFAGSYPAEHKRLFLEELSDRETHATFCMPWLF  
RTIDEVVAIVSEMPGDGSLGNVLAEGNFSCSIALEIEEASMDSQPPHVLAFPFPTQGHINPMILLCRKLA  
SMGFVVTFPHIGSKNMSSTADEQF

>Selmo1\_439767\_estExt\_fgenesh2\_pg.C\_80109

MEGGSGKDSYHRNSSLQAQGFSSVHAAIEQAIASSAPLFLDSSLDVIQIADLGCSHG SNTIQALDFVARE  
ITRLREQVGD RKP LEIQAFSDLA VNDFN TLFALVPH PQGEPYFFSGVPGSFYGR LFPRSSIHFAMT SYA  
LHYLSKIPESITDKNSPAWNRDSMFVSRSSPAAIEAFAQQASDDL FVFLHSRAQELVTGGILLMFP IRL  
LSHELNEADFPFQSVWKDLIQEESLDTFNFPAYLRSGDEVRSLSGSDVQQFTVIHSEN LKFPWLDPKSSS  
YAATATKYWKAVSKPFIEKHIGNQEVVELMYERMP SKVTVSSPSGELDIVLLVLVKKLSHWTVRVAKLKD  
VQSATFGIFKRPF\*

>Selmo1\_65922\_gw1.0.1722.1

SMEGGVGISSYRNSSNQGS AFLLIAPALRAIAAHDFADHTAAPIRIADLGCAVGSNTITAVAFVIKAV  
RDKFKSSGLREPELQALFSDLVSNDFNTL FQHLEGADFFVAGVPGSFYHRLFPSSSIHFMCNVALQWLS  
KASVPAAVADRRSSWNAGRITAGGSAPEVARAFASQA HEDLCRYLACRAEETVPGGLVTFFVSIRSSSD  
PAEQTGGEDCSLGMVVTCLQAWNDLVLEGLIDEETRDSFNIPAYHRTLDEIAKAVSESG

>Selmo1\_67910\_gw1.8.1443.1

LEIQAFSDLA VNDFN TLFALVSH PQGEPYFFSGVPESFYGR LFPRSSIHFAMT SYALHYLSKIPESITD  
KNSPA WNRDSMFVSRSSPLVAIEAFAQQASDDL SIFLHSRAQELVTGGILLM

>Selmo1\_75845\_e\_gw1.0.2467.1

MEGGSGKDSYHRNSSLQAQGFSSVHAAIEQAIASSAPLFLDSSLDVIRIADLGCSHG SNTIQALDFVARE

IIRLREQVGDGRKPLEIQAIIFSDLAINDFNTLFLVRHPQGEPIFFSGVPGSFYGRFLPFRSSIHAFAMTSYA  
LHLYLSKIPESITDKNSPAWNRDSMFVSRSSPPAAIEAFAQQASDDLIFLHSRAQELVTGGILLMLFPPIR  
LSHELNEADFPFQSLWKDLIQEVKSDLSLSLSLSVLSVCLSLSLSLSLCSQHIC\*

## IAR4

>AT1G59900

MALSRLSSRSNIITRPFSAAFSRLISTDTTPTIETSLPFTAHLCDPPSRVSESSQELLDFFRTMALMR  
RMEIAADSLYKAKLIRGFCHLYDGQEAIVAIGMEAAITKKDAIITAYRDHCIFLGRGGSLHEVFSLEMGRO  
AGCSKGGKGGSMHFYKKESSFYGGHGIVGAQVPLGCGIAFAQKYNKEEAFTFALYGDGAANQGGQLEALNI  
SALWDLPAILVCENNHYGMGTAEWRAAKSPSYKRGDYVPGLKVDGMDAFAVKQACKFAKQHALEKGPPI  
LEMDTYRYHGHSMSPDGPSTYRTRDEISGVRQERDPIERIKKLVLSHDLATEKELKDMKEIRKEVDDAIA  
KAKDCMPPEPSELFTNVYVKGFGTESFGPDRKEVKASLP

>AT1G01090

MATAFAPTKLTATVPLHGSHENRLLLPIRLAPSSFLGSTRSLSLRRLNHSNATRRSPVV  
SVQEVVKEKQSTNNTSLLITKEEGLELYEDMILGRSFEDMCAQMYRGMFGFVHLYNGQ  
EAVSTGFIKLLTKSDSVVSTYRDHVAHALSKGVSARAVMSELFGKVTGCCRGQGGSMHMF  
KEHNMLGGFAFIFEGIPVATGAASFSSKYRREVLKQDCDDVTVAFFGDGTCNNGQFFECLN  
MAALYKLPPIFVVENNLWAIMSHLRATSDPEIWKKGPAFGMPGVHVDGMDVLKRVREAVK  
EAVTRARRGEGPTLVECETYRFRGHSLADPDELDAEAKAKYAARDPIAALKKYLIENKL  
AKEAELKSIEKIDELVEAEVAFADASPQGRSQLENVFADPKGFGIGPDGRYRCEDPK  
FTEGTAQV-

>IAR4\_AT1G24180

MALSRLSSRSNTFLKPAITALPSSIRRHVSTDSSPITIEAVPFTSHLCEPSRSVETSSEEILAFRDM  
ARMRRMEIAADSLYKAKLIRGFCHLYDGQEALAVGMEAAITKKDAIITSYRDHCTFIGRGGKLVDAFSEL  
MGRKTGCSHGKGGSMHFYKGDASFYGGHGIVGAQIPLGCGLAFAQKYNKDEAVTFALYGDGAANQGGQLE  
ALNISALWDLPAILVCENNHYGMGTAWRSKSPAYFKRGDYVPGLKVDGMDALAVKQACKFAKEHALKN  
GPIILEMDTYRYHGHSMSPDGPSTYRTRDEISGVRQVDRDPIERVRKLLTHDIAATEKELKDMKEIRKEVD  
DAVAQAKESPIPDASELFTNMYVKDCGVESFGADRKELKVTLP-

>ChINC64A\_1\_141042\_IGS.gm\_30\_00080

MLAAVSSIAAGAARQA VGGSLACLASTLHRRGFAASATVDGDTLTVENVPFKTHRIDPPPTTVTATKDEL  
LAYFKQLYRLRRMEISADMLYKAKAIRGFCHLYDGQEAIVVGLEAALDHNSIITSYRNHATHVARGGTV  
SEVIGELMGRTTGASKGKGGSMHMYRREANFFGGQIVGAQVPLGTGLALAHQYNGTGGVAVAMYGDGAA  
NQQQIFESFNMAALWDLPCIFVCENNHYGMGTAEWRAAKSPAFYTRGDYMPGMKCDGMDVLAVKQAFAYA  
KQHAVANGPIILEMDTYRYHGHSMSPDGPSTYRTRDEISSIRQQRDPVEHVR\*

>ChINC64A\_1\_56254\_estExt\_fgenesh3\_pm.C\_160009

MYRLRRMEISADMLYKAKQIRGFCHLYDGQEAIVVVGMEAALQSDSVITSYRDHAHFVGRGGTVLEVFAE  
LMGRVEGASKGKGGSMHMYRQANFFGGQIVGAQVPLGAGLALAHQFRGDGGVAVTMYGDGAAQQGQIF  
ESFNMAALWDLPCIFVCENNHYGMGTAEWRAAKSPAFYTRGGDTMPGMSCDGMMDVLAVKQAFQYVLA  
EKGPLILEMDTYRYHGHSMSPDGPSTYRTRDEISGIRAKRDPPIERVRQLLAANGLAESSELKAIEREVKGE  
IDGAIDDAKARLPADEELWTNIWRAPLGATMRGIESSHKQRLPS\*

>Chlre3\_193810\_estExt\_fgenesh2\_pg.C\_500020

MLITQSMSAPEQKHLHQPPQLSPFALYSGALVQSKPQVLPSPSPAAAPAAAAYVPCPNPNTFDAAQAA  
AAREARRRCLRDIFLLSASLAAAALVGLAAALASPVAVHPGGGSRDGGDFDVANLRDLFSDAIALGLGQL  
LALPWVPLAAVLSAGTLLALALSEATRRRHTNAAWAAFGAFTAGQALLVGLTTHPHAARVPGADPFVAVG  
GWRGGVAGGGGGGGRSRWAEAAAYALGVYLDPLCLALYGLHHLQAEQAQAVAITGLKSQSGSGLSMA  
RLFASAAAAPSIKVEVMPYKVRHIEAPSNVETNVEELTNFYKLMYKMRMEIAADMMYKAKFIRGFCHL  
YDGQEAVDGMDVLAVKNAVAFKAYALANGPIVMEMD TYRYHGHSMSPDGPSTYRTRDEINAMRTERDPIE  
RVKRLLLNNGVDPADLKKIDKEVKVEVDAVEQAKQGGIPLHLWLRNMYAEPLGAGMRGVLPAEYHVPA  
FDPTYKS\*

>Chlvu1\_25215\_e\_gw1.2.346.1

MEAQAAESACHGCLQVREYQAHHIEAPGTTVTTTKAELVQFFESMYRMRMEIAADMLYKSKLIRGFCHL  
YDGQEAIVVGLEAASTFQDSIITSYRDHCTHLGRGGTVYDVIAELMGRVEGATKGMGGSMHMYNKAHNFY  
GGQIVGAQVPLGAGLYAHKYRKDGSVAAYAMYGDGAANQGGQIFAFNMAGLWELPVVICENNHYGMGT  
AEWRGSKSAFYTRGDYIPGLKIDGMDALAVKHGVAYAKAHAVEHGPIILEMDTYRYHGHSMSPDGPSTYR  
TRDEITQIRTQRPVEHVKKLLDRGLVDAADIKKTEKAIKKEVDEAVERAKQGTIPPEMLWKNYADP  
LGSVMRGMDSQTKINLS\*

>Chlvu1\_29303\_e\_gw1.8.183.1

MALLKRLPAQLSVAARCSGLRSFSAIPEAVEDDETVTVTNPNYKHLRLEDEGPPTEVETSKGELLGMFKT  
MYTMRRMELAADLLYKQKLARGFLHLADGQEA VPTGMEAAALTFQDSIIQSYRDHCTFLGRGGTVREIVAE  
LLGKETGAARGLGGSMHL YKKEHNFYGGEGIVGTHIPLGAGLGLAHKIRKDGHV ALALYGDGAANQGGQVA  
EAYNMAAIWDLPVIFVIENNHYGMGTSRRASKSAQY YTRGDYIPGVVVDGMDALS VKSATAFAKQHVLA  
HGPLMLEMDTYRYHGHSSIDPGSTYRTRDEIQGIRARDPPIEVRNLLQEHSFADSGELKRIEKDIKDV  
ADQIEQAKQDAYPPIENLWLNKYKDLGAKLRGMEGRPKIQLPEGSAK\*

>Chlvu1\_73729\_fgeneshCV\_pg.C\_scaffold\_8000110

MAELLGRVDGASKGLGGSMHL YKKDHNFYGGIGIVGTHVPLGAGIGLAHKYRKDGHV SFTLYGDGAANQG



QAYNMAALWDLPVVFTIENNQFGMGTSARRASKNTEFYTRGDYIPGVVVDGMDALAVKTATAFAKQHALQ  
HGPIILEMDTYRYHGHISDPGTYRTRNEIQGIRRARDPIEHVRNLLQEHSFADSNEKRLKRENDIKKHV  
TEEVVEAKRSPPPPLCYLWKVYKKGWGAKLRNVELGRGFIQLPS\*

>MicpuC2\_22101

MMIDVPIPFVAHRIDPPSQTVETSKAEIVDMFTQSYLMRRLIEAADVLYKGGKIRGFCHLYDGGQARSISH  
WSPYDREAVCVGMEAAALNKDDAIVTSYRDHCTHLGRGGTPLEVMAELMGRIDGASKGMGSMHMYKRDAH  
FFGGNGIVGAQASSDQPNVAVAMYGDGAANQGQLFEALNIAALWDLPLIYVCENNHYGMGTARSAKSP  
YYKRGDYVPGLRVDGMDALAVKQAIKFAKEHCVSGKGPVLEMDTYRYHGHSMSPGTYRTRDEITGIR  
QERDPVERLRKLIQHHELLAPEEIKAEKTQRKIVDDAVAGKASPEPDSNALFRNMNQVAEGIVIRGVD  
SGARTTLATVQP\*

>MicpuN2\_89160\_e\_gw2.16.125.1

MTIEIPIPFKAHNIEAPSQMVETSKTEIVDMFTQAYLMRRLIEASDVLKGGKIRGFCHLYDGGQEAFCV  
MEAAALTKEDAIVTSYRDHCTHLGRGGTPLEVMAELMGRVDGASKGMGSMHMYKRANFFGGNGIVGAQT  
FIGAGLAFSYKYNQPNVAVAMYGDGAANQGQLFEALNIAALWDLPLIYVCENNHYGMGTARSAKSP  
YYKRGDYVPGLRVDGMDALAVKQAIKFAKHCVSGAGPIVLEMDTYRYHGHSMSPGTYRTRDEITGIR  
QERDPVERLRKLIQHHELLAPEEIKAEKTQRKIVDDAVAGKASPEPDSNALFRNMNQVAEGIVIRGVD  
SGARTTLATVQP\*

>Ost9901\_3\_29179\_eugene.0100010573

MVIEITPVPFKGHLIVPPSQMVETTKSEIIDMFTQAYMMRRLIEAADVLYKGGKIRGFCHLYDGGQEAFCV  
MEAAALNKQDAVVTSYRDHCTHLGRGGTPLEVMAELMGRVDGAAKGGGSMHMYRREANFFGGNGIVGAQT  
AIGAGLGFAYKYNQPNVAVTMYGDGAANQGQLFEALNMAALWDLPVIFMCENNHYGMGTARSAKSPV  
YYKRGDYVPGLRVDGMDALAVKQAMKFAKEVCVAGNGPIVLEMDTYRYHGHSMSPGTYRTRDEITGIR  
QERDPVERLRKLIQHHELLAPEEIKAEKTQRKIVDDAVAGKASPEPDSNALFRNMNQVAEGIVIRGVD  
SQTFFHALV\*

>Osta4\_14729\_e\_gw1.01.00.350.1

MRPRGRRXXXXXXMTIEITPVPFKGHLIEPPSQMVETSRGEIIDMFTQAYMMRRLIEAADVLYKGGKIR  
GFCHLYDGGQEAFCVGMERALTKEDAVVTSYRDHCTHLGRGGTPLEVMAELMGRVDGAAKGGGSMHMYKR  
DANFFGGNGIVGAQTPIGAGLGFAYKYNQPNVAVTMYGDGAANQGQLFEALNIAALWDLPVIFMCENN  
YGMGTAQERSAKSPVYYKRGDYVPGLRVDGMDALAVKQAIKFAKEHCVSGKGPVLEMDTYRYH

>Phypa1\_1\_105993\_estExt\_fgenes1\_pm.C\_560024

MALRQAWQKTGKALNRGAIAPAVIAFARPLSTSADPIVLDIPVPFKGHNVEAPSQSVETSAQELVGGFKT  
MFVMRMEIAADSLYKSKFIRGFCHLYDGGQEAFCVGMERALNERDCIITAYRDHCTHLGRGGSVLEVF  
LMGRKDGCSLGGKSMHMYNKKGGFYGGNGIVGAQTPLGAGLAFQKYLKADGVTAMYGDDGAANQGQLF  
EAMNISALWDLPVIIYVCENNHYGMGTAEWRSASPEYYKRGDYVPGLKVDGMDCLAVKQAVKFAKEHALK  
NGPMVLEMDTYRYHGHSMSPGTYRTRDEISGVRQERDPIERIRKLLVTHELASVADLKAIEKEAKKEV  
EDALAKAKESPADSEELFSHIYRKSYGSEAYGADRKEVTVKLP\*

>Phypa1\_1\_123902\_e\_gw1.47.86.1

MSLVRKAVKKGWVWVWALAPAARVMSQALSTASEPITLDIPVPFKAHKVVETPSVTVETSAQELTNFFKTMFI  
MRRMEIAADSLYKSKFIRGFCHLYDGGQEAFCVGMERALNDKDCIITAYRDHCTHLGRGGSVLEVF  
RKGCSLGGKSMHMYNKKGGFYGGNGIVGAQTPLGAGLAFQKYLKADGVTAMYGDDGAANQGQLF  
EAMNISALWDLPVIIYVCENNHYGMGTAEWRSASPEYYKRGDYVPGLKVDGMDCLAVKQAVKFAKEYALQNGP  
MVLEMDTYRYHGHSMSPGTYRTRDEISGVRQERDPIERIRKLLSNNIATVAELKTMEKEAKKEVEDA  
LSKAKESPPSDDELFTHVYRKGYGAKAYGADRKEVTVKLP\*

>Phypa1\_1\_193663\_estExt\_gwp\_gw1.C\_2010096

MALRQAWQKAGKVLNGGALVSPGSTFARALSTSSDPLTLEIPVPFKGHKVDPPSSVETSAEELVDFFR  
TFMVMRMEIAADSLYKSKFIRGFCHLYDGGQEAFCVGMERALNDKDCIITAYRDHCTHLGRGGTVLEVF  
LMGRKDGCSLGGKSMHMYNKKGGFYGGNGIVGAQTPLGAGLAFQKYLKADGVTAMYGDDGAANQGQLF  
EAMNISALWDLPVIIYVCENNHYGMGTAEWRSASPEYYKRGDYVPGLKVDGMDCLAVKQAVKFAKEYSLK  
NGPMVLEMDTYRYHGHSMSPGTYRTRDEISGVRQERDPIERIRKLLSHEFASVADLKAIEKEAKKEV  
EDALAKAKESPPSDAPELFSHIYRKSYGAEAYGADRKESTVKLP\*

>Phypa1\_1\_59475\_fgenes1\_pm.scaffold\_169000019

MQIIRRAEIAADMFLFKSQMIRGFCHLYDGGQEAFCVGLERALSYYDDNVITAYRDHGIFLGRGGTVFELFSE  
LMGKRTGCALGKGGSMHLYHREHNFVGGWVIVGTTPLGAGLAFQKYLKADGVTAMYGDDGAANQGQLF  
EAQNLAALWNLPLILVIENNHFGMGTAEWRSKKTTHYDRVSYIPGIKTDGMDVFAVGEAFKCKEHLCS  
GKGPITLEADTYRYHGHSMSPGTYRTRDEISGVRQERDPIERIRKLLKEELATNEELKDLKQIRHE  
VDEASAKAREAEFPGEELFANIYKADSLIVTGCDRKHSHKSVQMS\*

>Selmo1\_404036\_fgenes2\_pg.C\_scaffold\_2000024

MARWRQRLSSACSSSSSAAAPQALLRLASSALSRSRSGFAAAPDDTTPFVVDIPVYAGHRCDPPE  
QRVETSAKELVDFFKVYVMRMEIAADSLYKAKFIRGFCHLYDGGQEAFCVGMERALTKEDAIITAYRDH  
CTHIGRGGTVLEVMAELMGRKSGCSLGGKSMHMYNKEGNFYGGNGIVGAQTALGAGLAFQKYNKQNAV  
SLALYGDGAANQGQLFEAMNISALWDLPVIFVCENNHYGMGTAEWRSASPEYYKRGDYVPGLKIDGMDV  
LAVKQVRFARQKHALTKGPVLEMDTYRYHGHSMSPGTYRTRDEISGVRQERDPIERIRKLLAKEIV  
TVADLNKLEKQAEVDEAVNQAKEGGQPETHLFTHVHVGLKQLAYGPDRKEVIVPLP\*

>Selmo1\_404383\_fgenes2\_pg.C\_scaffold\_2000371

MARWRQRLSSACSSSSSAAAPQALLRLASSALSRSRSGFAAAPDDTTPFVVDIPVYAGHRCDPPE

QRVETSAKELVDFFKVMYVMRMEIAADSLYKAKFIRGFCHLYDQGEAVCVGMEAALTKEDAITAYRDH  
CTHIGRGGTVLEVMaelMGRKSGCSLGGSMHMYNKEGNFYGGNGIVGAQTALGAGLAFQKYNKQNAV  
SLALYGDGAANQGQLFEAMNISALWDLPVIFVCENNHYGMGTAEWRSKSPYKRGDYVPLKIDGMVDV  
LAVKQGVRFakeHALTKGPIERDPIERVRKLLAKEIVTVADLKNLEKQAKAEVDEAVNQAKEGGQPETH  
ELFTHVHVKGLKQLAYGPDRKEVIVPLP\*

>Selmo1\_96403\_e\_gw1.18.411.1  
MTRSTVHRIEAPSNIVETNVSELMSFYKLYMKMRRMEIAADMMYKAKFIRGFCHLYDQGEAVLTGIEAAIT  
MEITADKLFKSQLVRGFCHLYDQGEAVTIGMEALTYEDTVITAYRDHATFLGRGGTVHECFaelMGRST  
GCARGKGGSMHLYKPSNNFYGGWIVGTTGPLGAGLAFANKYKNNVAMAIYGDGAGNQGQLFEAKNMA  
GLWDLPLIFLVENNHYGMGTAEWRSKKTTFYDRVSYIPGIKVDGMDAFVKEATRFakeHCLSGKGPV  
LEADTYRYHGHSMDPGSTYRTRNEIQGVRQERDPIERIKKLMIKENVMREEEFKAVDKEIKQEVDDAAA  
KAKDDPNPGEELFMNIYKNDSSGLKTYGCDRNMVRVQLP\*

>Volca1\_68179\_e\_gw1.73.7.1  
MPFKVHRIEAPSNIVETNVSELMSFYKLYMKMRRMEIAADMMYKAKFIRGFCHLYDQGEAVLTGIEAAIT  
LQDSIITSYRDHCQHSRGGTVLELMAELMGKREGATRGLGGSMHIYNRKNNFYGGNGIVGAQIPLGAGI  
ALAHKYRGEFNVICITMYGDGAANQGQKYEALNMAGLWNLPAIFVCENNHYGMGTAEWRAAKSPNFYTRGD  
YIPGIKVDGMDVLA VKQAVAFAKAYALANGPIIMEMDTRYRYHGHSMDPGSTYRTRDEINAMRTERDPIE  
RVKLLLANGVESAEFKRLDREIKKEIDDAVEAAKAGSIPDPSWLWKNMYAAPLGAEMRGLVPGQYHAPA  
FDPEYKS\*

## **IBR5**

>IBR5\_AT2G04550  
MRKRERENPCSHYHYKYEAGEVCGVCGHMPVSSDTPVAPQVHVSAFPSEILPEFLYLGSYDNASRSE  
LLKTQGISRVLNTVPMQNLYRNSFTYHGLDNEKVLQFDDAIKFLDQCEKDKARVLVHMSGKSRSPAVV  
VAYLMKRKGWRLAESHQWVKQRRPSTDISPEFYQLQEFEGGIFGSEMMSAMNINDAPTFGFGPKIDNQ  
AQAPVFNAPTSSIFSSPASSIPPQEFTEFGATPPKPTTGGDIAMDGS-

>Phypa1\_1\_106219\_estExt\_fgenes1\_pm.C\_660020  
MRKRERENPCFVCGHYHKFEDGEVCGICGHRLQEATEKGPQSAFSTEILPQFLYLGSYDNASRAELKA  
QNITRILNTVPTCQNLKNSFTYHSLKEEKTIPIFAECLEFIEQARVDKARVLVHMSGQNRSPAVVIAYL  
MKHKQWRLPQAYQWVKDRRPSINLSEAVAQQLQFEIEVFGNNVPTTPIYNTPAGVTFGFGYPTVPEPI  
VPTFTPQPMANPLGQAPVFGSVGVPIMPSSNFVFGAVRHEPRAAMDQSMDS\*

>Volca1\_77506\_estExt\_Genewise1.C\_700072  
MKAKRDREEPFCFNHYHDHESGEPQCICGHVLTQAERRQLEHSLVPTGIIPGSLYLGSYDTASRSELLR  
AMGITHILNTWPSNPAKFNSFTYHTVSSAPVDFQECDFIDNVLKSEQKVLVYCMGTGSSRSPSVVIAYL  
MKHRGWRLAESYKVVKDKRPAINIKDEDAKRLMEFEVQLHGSCSVPLGLAVLNNAPTFAPQVQPNPTAAQ  
VSEAVATPSTSGPTFGAQGSQSWLSASAPVEGFRFGASTQQPQPQLGLEENPFAAARRRIGVGGNDM  
ETGV\*

>Chlvu1\_28104\_e\_gw1.6.447.1  
MKKRREREPCICQHYHDYEGGEQCSVCGHQMPQTDAASQASAYPSNILPQFLYLGSYDNASRSELLK  
TVGITHILNTVPSQPLYKNSFTYHTVSTSPSFEFECFEFLEKDGKDVRLVHCKMGVSRSPAIVIGYLM  
KHRRWRLCDSYKVVKEHRTATQLTPGQSS\*

>ChINC64A\_1\_13330\_gw1.1.462.1  
QKREREPCDVCGHYHDYGGEPICAGHRLEMPAGCAAGAAPLPAVKPSPAFPSEIVPGFLFLGSYDHA  
SRHEILKTLGIGNILNTVPSQALYKNSFTYHTVSSAPPLDECYCFLEDEVQRQGGKVLVHMSGLSRSA  
VVVIYLMRRNTWRLSEAYHVVKDRRPQIAIT

>Selmo1\_36025\_gw1.11.577.1  
MRKRERENPCFICNHYHKFEDGEPCVCGHRRTAGEEKCSQSAFSAEILPFLFLGSYDNASRAELKAQ  
GITHILNTVARCQNLKNSFTYHCQEERLPLEECLDFIEKSRQNNAKVLVHMSGQSRSPAVVIAYLMR  
HKGWRLSQSYEWVKERSPSVKL

>Chlre3\_102435\_e\_gwH.19.159.1  
MKSKRDREEPFCFNHYHDVENGEPCTVCGHVMSQAERKQLEPSVLPTAVIPGSLYLGSYDTASRSELLR  
AMGITHILNTWPSNAELFKNSFKYHTVTSTPVDFQECHDFLDMLNKEQKVLVYCMGTGVSRSRSPSVVIAYL  
MKKRGWRLAESYKVVKDKRQTINKEGK

>MicpuC2\_6481\_gw1.14.189.1  
MVKRERENPCFICGHYHRYEEGEVCGVCGHQPPGHALDANAPPDGAFFPSEILPGFLYLGTYDHSARADAL  
RAVGVEDVLCNPVDSQCLHRNAFNHYHLSRAPTRDEVHFAEAVAFFETSRARGRRCLAYCMTGTSRSA  
VIAYLMAHAKRWRLTRAHAHVKERRALVNLQPAQAAAQLLRFEREIFGDVVDADAPSSSSPGGFG

>IBR1\_AT4G05530  
MEKKLPRRLEGKVAIVTASTQIGIFGITERFGLEGASVVVSSRKQANVDEAVAKLKS KGIDAYGIVCHVS  
NAQHRRNLVEKTVQKYGKIDIVVCNAAAANPSTDPILSSKEAVLDKLWEINVKSSILLQDMAPHLEKGS  
VIFITSIAGFSPQGAMAMYGVTKTALLGLTKALAAEMAPDTRVNAVAPGFVPTHFASFITGSSEVREGIE  
EKTLNRLGTTGDMAAAAAFLASDDSSYITGETLVVAGGMPSRL-

>MicpuN2|84177|e\_gw2.08.491.1  
AKKVKSDSEPSEVPDVFLGSGIAAHNREVLERLGITHILTVAGGFEPKFPQSFYIECVVDVKDVPEERLS  
VHFDRLKFIACLDDGGRVLVHCFAGKRSRATVCAAYVMATEGLSLEETLVITGRKRPAASPNHGFMQAQ  
LASFERELNRARTEGRLLGRVQLDARRAASCEELAVKSGEEGEEVVEGTRDE\*

>Ost9901\_3|27876|eugene.1500010198  
MPHVVDSDDDAPPPRAAWCRACGHDPHTTCGVCGHRRVDDDLDDLPRLGHDEPIIEVIDKFLCLG  
AFEHTSKEDVLLACGIRTVMNSVPQCTPCCSSRQIDVFTAPRNANDGKLDLGETVRKLEQLHVKAARAD  
EAGVPNRVLVYCMGSHSRAPSVAVAYLMSERRKLEDAMRALERRYPGRHGKIKLKPSDLATLEEFEREL  
YPNE\*

>Ost9901\_3|28071|eugene.1600010127  
MLVGAFEHTSSERALLAAGVRTVINA VPSCTPCCSGKYL SVVTLNAREPPERGLDFRHACERLQALHARS  
ARAYESYPMRVLVYCMGSRGSKAPSVAVAYVMFKMRMSLTAAKAFVEGRYPGGHRGMRLKREDEEALFAFE  
RELAENPPDAMPEGQ\*

>Ostta4|37447|1700010123  
MRGVKRPCADALDASRCETCEHYHARGTTCDECGHVRRADADADGDGDGRRARALEGERARRATTVVEVI  
DRFLLVGAFEHTSSEETLLRAGVRTVINAAPTCESSGRWLSVNLNTSEEGGAGDLDRHACERLQSL  
HARSTSALEIDKSPVRLVYCMGSRAPTAVATAYVMFKMRMSFKDALAYVQSRYPADHRGVKLDKEDA  
SLLERFERELAENPPNQARVSHTY\*

## IGPS

>IGPS\_AT2G04400  
MEGLVPVQRLPIKVASPSLYRCNNSVSIRRSISGFAMDRKINFRAPSQFSIRAQQSDLKESLAVSSSSVE  
DKGNVLRKEWEVEMYQEELAISQGIRIRKPPSKAPLGYSGPFELRLHNNADSPRNILEEITWYKDVE  
VSRMKELNPLDVLKKA VEDAPPTDFV GALRMAHKRTGFPGLIAEVKKASPSRGILKENFDPVEIAQAYE  
KGGAACLSVLTDQKYFQGGFENLEAIRSAGVKPCLLCKEFVVDPWQIYYARTKGADAVLLIAAVLADLEI  
TFLLKICKKLSLAALVEVHDEREMGRVLGIEGIELVGINNRSLLETFEVDISNTKKLLEGEHGRQIRERDM  
IVVGESGLFTPDIAVYVQAAGVKAVLVGESIVKQNDPEKGIAGLFRNISHT-

>Putative\_IGPS\_AT5G48220  
MEAALLSLQPPSSATQRRLSPFNHLNLTLPSSYAPLRAQKSGITEGSDSALEAKVSEQEVGMVQNEVV  
ESQIRIRRRPPTGPPLHYVGPFEFRLQNEGNTPRNILEEIVWHKDKVEAQMKERKPLYSLKKALDNVPP  
AKDFIGALRS AHQRTGLPGLIAEVKKASPSRGILREDFNPVEIAQAYEKGGAACLSVLTDKDYFKGSYEN  
LQAIMAEAGVKPCLLCKEFIVEAWQIYYGRSKGADAVLLIASVLPDLDIKYMICKICKILGMATLVEVHDER  
EMDRVLAIEGVELIGINNRNLETFEVDLGITKCLLEGERGELIRQKDILVVGESGLFTPEDIAFVQEAGV  
KAVLVGESLIKQSDPGKAISTLFRDVS-

>PDX1\_AT5G01410  
MEGTGVVA VYNGAITEAKKSPFSVKVGLAQMLRGGVIMDVVNAEQARIAEEAGACAVMA  
LERVPADIRAPQGGV ARMSDPQMIKEIKQAVTIPVMAKARIGHFVEAQILEAIGIDYIDES  
EVLTLADEDDHINKHNFRIPFVCGCRNLGEALRRIREGAAMIRTKGEAGTGNIEAVRHV  
RSVNGDIRVLRNMDDEVFTEFAKLAAPYDLVMQTKQLGRLPVVQFAAGGVATPADAALM  
MQLGCDGVFVGS GIFKSGDPARRARAIVQAVTHYSDPEMLVEVSCGLGEAMVGINLNDEK  
VERFANRSE-

>ChlNC64A\_1\_25164\_e\_gw1.15.75.1  
MQEVTIRRRPPHGIEAQCNGPVDKFRAEENQPRNILEEIVHKGVEIARWRERVPGLGMVMTAAKASPAPR  
DFIGAIQAAAERTAKPGLIAEVKKASPSIGVIQPDFDPVDYACRVQIAQAYERGGAACLSVLTDKFFQGG  
GFENLTLIRQAQVQCPLLCKEFIVEAYQVFKARASGADAVLLIAAVLPNSDMNYLIKAARSVGLQCLIEV  
HTVAELERMLLLNNLEGCMLGINNRDLQTFKVDLGNTKQIMESAAGQEVLRGRIIMAGESGIFTPDDVAF  
VQSAGCGAILVGESIVKQGDPEAAVRTLEQ\*

>Chlvu1\_29053\_e\_gw1.7.254.1  
MKEKEPLARLSMQUIVAAPSRDFIGALRAANERIGKPLIAEVKKASPSRGVIQPDFDPVRIAKAYEAGG  
AACLSVLTDKAYFQGSFDYKQIRAAVSTPLLCKEFIVEAYQLFKARASGADAVLLIAAVLPNADLAYL  
TKAAGKCGQLVLEVHTIAELERVLKLDLSSHVMGINNRDLQTFEVDIENRRIMESSAGQQVIARGF  
LMAGESGIFTPEHVA FVQSTGCGAILVGESLVKEGNPEAAVKLLSLA\*

>MicpuC2\_35481  
MRVSASVSDEAKPEVMIRRRPPNGASVHEVGTDQFAFKMEAVTPDGERVDNVDNKPRNILEEIVWYKDVE  
LAKRKEAFPLTLVTRTAMQNAPPARDFVGAIKTQRETTGQPALIAEVKKASPSKGVIQPNFDPVIAKAYE  
AGGAACLSVLTDEKYFQGGFENLELIRAGVECPCLLCKEFIVDAYQIYLARKY GADAILLIAAVLPNQDL  
TYFQKIAKSLGMAALIEVHTYEEMERVLKLDIDLLGINNRDLGTFEVS LDTVVELLSGPLGEQVRARGI  
TMVGESGIFTIDVNVLQDAGVGCLLVGESLVKQDTPDVGIKKLYGRPLD\*

>MicpuN2\_55656\_EuGene.0200010033  
MASVSEPKPEVTIRRRPPFGQAKHDVGTDQFAFKMETINEKGERIDNEANKPQNILEEIVWYKDEWLAKQ  
KEKFLPLTLVRTAIQNQEPARDFVGAIKDQWKSTGQPGLIAEVKKASPSKGVIQPNFDPVIAKAYEAGGA  
ACLSVLTDEKYFQGSFENLTLIREAGVTCPLLCKEFIVDAYQIYLARKY GADAILLIAAVLPNQDLKYFT  
KIAKSLGMAALIEVHTYEEMERVLQLEDIELLGINNRDLGTFKVDLNVTVLDDLAGPLGDQVRERGITMVG  
ESGIFTIDVNVLQEAGVGCLLVGESLVKQDTPDVGIKKLYGRPLD\*

>Ost9901\_3\_32358\_eugene.0600010417  
MSAATGRATLATGARRDARRARRATRPASAPSGVDDGAVSIRRRPPNGPSKHDLGVGQFEFVIEEVAPT  
GERVTNENNKPNILEEIVWYKDVLAERKEKFPLQLVRTALVNAPPTRDFVKAITDQLAATKQPLGIAE  
VKKASPSKGVQPNFDPVIAKAYEEGGAACLSVLTDEKFFQGGFENLALIREAGVTCPLLCKEFIVDAY  
QIYLARKYGADAILLIAAVLPNQDLKYFIKIAHSLGMKCLIEVHTY GEMKRVLDDGDFPIDLLGINNRDLG  
TFEVSLSVTTDLMNGLGEEVKRRGITMVGESGIFTIDVNLQDSGVGAVLVGESLVKQDTPDVGIKKL  
FGRPV\*

>Osta4\_8171\_fgenes1\_pm.C\_Chrom\_02.0001000046  
MIEEVNDKGERVTNEENRPRNILEEIVWYKDVLAERKEKFPLQLVRTALVNAPPTRDFVKAITDQLEAT  
KQPGLIAEVKKASPSKGVQPNFDPVIAKAYEAGGAACLSVLTDEKFFQGGFENLALIREAGVTCPLLC  
KEFIVDAYQIYLARKYGADAILLIAAVLPNQDLKYFIKIAHSLGMKCLIEVHTY GEMKRVLDDGDFPIDLL  
GINNRDLGTFEVSLSVTTDLMNGLGEEVKRRGITMVGESGIFTIDVNLQDSGVGAVLVGESLVKQDTP  
PDVGIKKLFGRL\*

>Phypa1\_1\_151163\_e\_gw1.330.21.1  
MRNTQGITIRRRPATGPIHNVGPFQFKIQSEGNTPRNILEEIVWHKDVAVQVSYQFLSSYLEILRCSL  
LQMKEKTPGLGALSCLMAGVGPTRDFVGLARARAAETGYPALIAEVKKASPSKGVQPNFDPVRIAQGYEK  
GATCLSVLTDKSYFQGGFENLRIRNAGVQCPLLCKEFIIAWQIYKARVSGADAVLLIAAVLPDQDLA  
YMTKIAKALGMAALIEVHSEREMKRVLGLPNVELIGINNRSLTFKVDINNTVELLKGDIQTIRERNII  
VVGESLFTPEDIALVRNAGVAVLVGESLVKQDDPGAGIAKLFGEDISRKQTSVA\*

>Selmo1\_267738\_estExt\_fgenes1\_pm.C\_240020  
MPETPAEWKGWEEKRIQEEIISKQGISIRRRPPTGPPHACGPFDFKLQNEGNTPRNILEEIVWNTEREV  
TEMKEKTPGLGALHKALPAVDPPRDFIGALKARKAETGLPGLIAEVKKASPSKGVQPNFDPVRIARGYER  
GGAACLSGSFENLKAIREAGVQCPLLCKEFIIAWQLYYARIKADAVLLIAAVLPDQDLLYMTKITKAL  
KMAALVEVHNAVEMDRVLRPLGIQMIINNRLNLENFEVDITNTESLLQGVRSIIREKEILVVAESGLST  
PDDIALVQNAVGSVAVLVGESLVKQDDPAAGIASLFGKDVSRAAQKNETIFV\*

>Selmo1\_407368\_fgenes2\_pg.C\_scaffold\_6000619  
MDEQERQLQSRQLQRLPPPQHRLLQKIVASTMQGRTAIVAEVARASPAEKPEGVAQRSQDYVTWGADA  
ISVCTDEEVSPDGVLDEAVSKAVEVPLRKDWIHPHQIDTRESGAAALTAVYSVLSKGTSPSILRYIA  
TVGLDAVVEVVNLKELEELSTLGIPLFGFNISVGVAVPIPGFRQDIAKSLVQKLPFGAASIVGVASMEEA  
RQMKVAGADAVYLRKREALSSQELLESLREGLSGDD\*

>Selmo1\_415962\_fgenes2\_pg.C\_scaffold\_29000067  
MASVQDCGSAACDAWSAFEQKQRDLARQRISIRRLAPSGYVLDKDGDEKPRNILEEIIWYKEMKMKLPL  
YEMKQKLPIDGPARDVFKVLDKRAAETGLPALIAEVKKASPSKGVQPNFDPGFSFENLSLIRAAQCPLL  
CKEFIIPWQIYYARAKGADAVLLIASVLTDDLRSLMRVVKQNGMSALVEVHNGTEMMDRVLELPGIELI  
GINNRNLETFKVDINNTVKLLTTARMDIIHALGIMVVGESLFTPEDIAVQKAGVRLGSLVFMEEISP  
KQNQRLLDRGPTPHWRIFRVFAESTEAAVSDASVAAADDSQVEPETAKEEESGGAAQEEQTEAEKLVMM  
LKAEGSMPDVSIPVQSSLEAMEDVSDVRITTFEGLTSISATNVASEIVDTMEKAGFRMHTLNLAIDDED  
\*

>Selmo1\_440464\_estExt\_fgenes2\_pg.C\_100501  
MASVQDCGSAACDAWSAFEQKQRDLARQRISIRRLAPSGYVLDKDGDEKPRNILEEIIWYKEMKMKLPL  
YEMKEKFLIDGPARDVFKVLDKRAAETGLPALIAEVKKASPSKGVQPNFDPVRIAKAYENGGASCLSV  
LTDKSYFQGGFENLSLIRAAQVQCPLLCKEFIIIPWQIYYARAKGADAVLLIASVLTDDLRSLMRVVKQ  
NGMSALVEVHNGTEMMDRVLELPGIELIGINNRNLETFKVDINNTVKLLTTARMDIIHALGIMVVGESGLF  
TPEDIAVQKAGVRAVLVGESLVEPETAKEEESGGAAQEEQTEAEKLVMMMLKAEGSMPDVSIPVQSSLE  
AMEDVSDVRITTFEGLTSISLTKKTHIQATNVASEIVDTMEKAGFRMHTLNLAIDDED\*

>Volca1\_104174\_estExt\_fgenes4\_pg.C\_130015  
MHRVVPSASTALGSSQRIFASHGRKVCFQGTTRRPVAPWRASSPNPSGPDDEPPKTPPNALEATIRRKQ  
RELEAAIRELGMEALDERLQSATQVPATPPYRLSRLIAEHVPQGRAVLVFEVARPNPETTSAEALAKA  
YVTLGGASALAVRTDSESTPSGLRDLFTVQQA VPRVPLARDWLIHPLQVCEIKEAGAAGALGIHQGVV  
FYAINVGVGLSVAIPGFANRIAGHLLGELPFGSISLVGVRSLLEESAARRSGADALLIKAELLQSHGTDV  
QALGNALQYAVTLDD\*

>Volca1\_57848\_e\_gw1.8.233.1  
MGEVTIRRRPPHGLETQPCGPHAFRVGGLPEENKPNILEEIVWVKAREVEVMRDKQPLAMLQALAKKMD  
PPRDFRGAVLAKANETGRPGLIAEVKKASPSKGVQPNFDPVRIAQAYERGGAACLSVLTDAKFFQGSFQ  
NLTRIRAAGVQCPLLCKEFIVEAYQVYKARASGADAILLIAAVLPNADLAYFMKAASNLGMTCLIEVHTE  
GELARVLQPLGVENHLLGINNRDLGTFKVDLNTTKRIMDSEWQQVQKDRGIVMVGESGIFTPEVAVFKQ  
AGCGAILVGESIVKQGDPEAGVKALLA\*

>jChre3|168613|fgenes2\_pg.C\_scaffold\_2000259  
MPRHARATPDDEPPKTPMSALEATIRRKQRELEATIRDMGMEALDERLQSATAMPLRPAYRLATLIAEN  
VPMGRAVLVYEVARPTPETTSAEALAKAYVQQA VPKVPLARDWLIHPLQVCEIKESGAAGALGLINQ  
VGVRSLEEASAARQSGADALLVKAELLASYGKDVRLGNALLEYAVTLDD\*

## ILLS-IAR3-ILR1

>IAR1\_AT1G68100

MSFSLRKLVLVLPILVFLVFLDLCVESGFSQSTPARDDHVHHHGGGCSHSHDHDHDHDHDDHVKTTAKVEM  
KLPEELAEEDMRLCGFGPCLHDHDHSSSTLTGFALWLNALGCSLLVSLASLICLVLLPIMFVQKPSK  
WVFDLALFGAGAMLGDAFLHQLPHAFGGGHSNDHHDHSHSDSPSHSHSIQDLSVGLSVLAG  
IVVFLVVEKLVRYVEENSSGNTWGHSHHHHHHAGSKKLKDEGDHNNLDQSSSDAIVNSSEKVSQGGSTDK  
SLRKRKTSASDATDKSDSGTEITSDGKSDKPEQVETRSSLVFGYLNLFSDGVHNFTDGMALGSAFLIYG  
SVGGWSRTRMFLLAHELPOEIGDFGILVRSQFTVTKALFFNLSALVALAGTALVLVWGNPEGQSSLIEGF  
TAGGFFIYIYAVAGVLAEMNNSGKSTLKNLSACHLISLILGMSVALCISLIE-

>IAR3\_AT1G51760

MSFFKWVSFVLILHLLNPTLISCSSNGLSQIPSKFLTLAKRNDFFDWMVGIIRRIHENPELGYEEVETSK  
LVRAELEKMGVSYKYPVAVTGVVGYVGTGHAPFVALRADMDALAMQEMVEWEHKSVPKGMHACGHDAHT  
TMLLGAALKLKEHEEELQGTVVLFQPAEEGGGAKKIVEAGVLENSAIFGLHVTNQLALGQVSSREGP  
MLAGSGFFKAKISGKGGHAALPQHTIDPILAASNIVVSLQHLVSREADPLDSQVVTVAKFEGGGAFNVIP  
DSVTIGGTFRFSTKSFMLKQKRIEQVITRQASVNMENATVDFIEEEKPFPPPTVNDKALHQFFKNVSGD  
MLGIENYVEMQPLMGSEDFSYQAIPGHFSVGMQNKARSPMASPHSPYFEVNEELLPYGASLHASMAT  
RYLLELKASTLNKSNKKDEL-

>ILL1\_AT5G56650

MALNNFLTFQLLLLLRVSSPWIWAGDVSRIPIFLELAKSPEVFDMSVIRRIKIHENPELGYEEFET  
SKFIRSELDELIGVYRFPVAITGIIGYIGTGEPPFVALRADMDALPIQEAWEWEHKSKNPGKMHACGHG  
HVAMLLGAALKILQHRQHLQGTVVLFQPAEEGLSGAKMMREEGALKNVEAIFGIHLSRTPFGKAASLA  
GSFMAGAGAFEAVITGKGGHAAIPQHTIDPVVAASSIVLSLQHLVSRETDPDSKVVTVTKVNGGNFV  
IPDSITIGGTLRAFTGFTQLQERIKEIITKQAAVHRCNASVNLAPNGNQMPPTVNNMDLYKFKKVVVRD  
LLGQEAFAVEAVPEMGSEDFSYFAETIPGHFSLGMQDETQGYASSHSPHYRINEDVLPYGAAIHATMAVQ  
YLKDKASKGSVSGFHDEL-

>ILL2\_AT5G56660

MALNKLLSLTFQLLFLLSVSSPWAIEDTSQIQTKLLEFAKSPEVFDWMVKIRRIKIHENPELGYEELE  
TSKLIRSELELIGIKYRYPVAITGVIGYIGTGEPPFVALRADMDALPIQEGVEWEHKSKIAGKMHACGHG  
GHVTMLLGAALKILHEHRHLQGTVVLFQPAEEGLSGAKMMREEGALKNVEAIFGIHLSARIPFGKAASR  
AGSFLAGAGVFEAVITGKGGHAAIPQHTIDPVVAASSIVLSLQQLVSRETDPDSKVVTVSKVNGGNFV  
VIPDSITIGGTLRAFTGFTQLQQRVKEVITKQAAVHRCNASVNLTPNGREPMPPTVNNKDLKQFKKVVVRD  
DLGQEAFAVEAAPVMGSEDFSYFAETIPGHFSLGMQDETNGYASSHSPHYRINEDVLPYGAAIHASMAV  
QYLKEKASKGSVSGFHEEL-

>ILL3\_AT5G54140

MANSSIVALLLFFVIASSVNGGDQEPNQYLTEALGDKEWLVSVRRQIHENPELLFELHKTSALIRRELD  
ELGVSYSYPVAKTGIVAQIGSGYPPVV ALRADMDALPLQELVEWDHKSIDGKMHACGHDSHTTMLLGA  
KLSKRKRMLNGTVRLLFQPAEEGGAGAFHMIKEGALGDSEAIFGMHVHTGLPTGELATISGPALASTSI  
FSVRMSGKSPASSETYSCVDPVLAASSTILALQLISREVDPLLSHVLSVTFMKGSGSEFDVIPAYVEFG  
GTLRSLTTNGINWLKRLKEVVEGQAEVQRCKADIDMHEDDHPMPATVNDHKLHEFTEKVLKLLGPEK  
VKPANKVMAGEDFAFYQQKIPGYIIGIRNEEIGSVRSVHSPYFFLDENVLPIGSATFAALAEMYLQEH  
QNQTKSGD-

>ILL5\_AT1G51780

MSFCKLVSVLILHLLNSCLISCSSNDLSQIPKNFLSLAKREDDFFDWMVGIIRRIHENPELGYEEVETSK  
LVKTELDKMGVSYKPNVAVTGVVGYVGTGHAPFVALRADMDALPIQEMVEWEHKSIPKGMHACGHDAHT  
TMLLGAALKLKEHQEELQGTVVLFQPAEEGGAGAKKIVEAGVLENSAIFGLHVSNNLGLGQLSSREGL  
LMAGSFRKATISGKGGHAAALPQFAIDPVAASNVLQHLVSREADPLDSQVVTVATFEGSDAFNVIP  
DSVTIGGTFRALLPKSFEQLKQRIVQVITQASVNMENATVDFLEDETPPPPTVNNKTLHLFYKNVSD  
MLGIENYVETLPMVSEDFAFYQAIPGHFSVGMQNKSHSPMANPHSPFFEVNEELLPYGASLLASLAT  
RYLLDSSSPNKDEL-

>ILL6\_AT1G44350

MDNLRKLNLSVSLTIIFVSLTIATNLPFFEVKYPNNNPFGLMLLRPTPIKNQSLGLPAHVGSDECRVWTK  
ACSDEILRLTYQPDNVAWLKRVRRTIHENPELAFEEYETSRLIRSELDRMGIMYRYPLAKTGIRAWIGSG  
GPPFVAVRADMDALPIQEAWEWEHISKVAGKMHACGHDAHTVLLGAAHILKAREHLLKGTVVLLFQPAE  
EAGNGAKNMIEDGALDDVEAIFAVHVSIIHPTGVIGSRSGPLLAGCGIFRAVITSEDSRGAANLLAASS  
AVISLQGIVSREASPLDSQVVS VTSFDGGHSLDVAPDVTVLGGTFRAFSNSSFYLLKRIQEVLMQVGV  
FGCQATVNFEEKQNAIYPPPTNNDATYNHLKVTIDLLGDSHFTLAPQMMGAEDFAFYSEIIPAFYFIG  
IRNEELGSHIAHSPHFMIEDSLPVGAAVHAAVAERYLNDKHS-

>ILR1\_AT3G02875

MDFSGSFFVIFVTFPLPSSAGSYDSGSGLESARGMLHSAKDPEFFEWMRGIIRRIKIHENPETGFQEF  
KTSQLRVDELDSLGVKYPVAKTGVAWIGSCKPVFGLRADMDALPLQELVEWESKSKVDGKMHACGH  
DTHVAMLLGAAKLLQTTKHLIKGTVKLVFQPGEEGYAGAYEMLKDEILDGILSVHVPSPISGGIGS  
RPGTVLAGAGLFTVTVHGQSHAATPHFSKDPVLAASSAVVALQQIVSRELDPLEAGVTVVGYIEGHAQ

NVIPQSAKFGGTFRSLSDNGLLFIQRRIKEISEAQASVYRCKAEVNFEEKPSLHPVMNNDGLYEHGKK  
VAEAMIGKNNFHDFTVMTGGEDFSFFTQKTKAAIFVLGVKNETLGAGKPLHSPYFFVDEEALPVGAALHA  
AMAVSYLDEHGHSHHEEVKSEL

>ChlNC64A\_1\_18222\_e\_gw1.1.154.1

MPQVGTALHRQQEDADGPRRAAGPWHRLRTPAACTPAAGSLSHFLDRAAGIQDWLVGTRRELHSPPELL  
FEEHNTSATIRRHLDQLNIPYQFPVAKTGVVATIGSGAPVVLRADIDALPITEETGLEFASRNGGRMHA  
CGHDHITMLLGAARLLKGEAELKGTVRLLFQPAEEGGAGGDLMVKEGDGLPPAGALDGVKAAFGMH  
VWPAMPSEVASRPGTLLAGAIQFEVTVRGRGGAAMPYLTADPVVATAAAV GALQSLVARETSPDFPAV  
ISVTRMAGGHAFNVFPDTATFGGTVRSNSDEGMQRLRRRLEELVASTAAAHGCTAEVDWMEDSMPYYPPT  
VNDPEAFKAMDVAGRCGGVLQAQLLAAATMGGEDFSFIARAVPSCFIFLGRNETVGAGAGVVFHGLHT  
PRFTLDEGLVKVGAALHTALASQYLQQWHERHEGELEGTAREEL\*

>ChlNC64A\_1\_22838\_e\_gw1.9.76.1

MINWALPLRCRCHRQTPRRRRRRRQLHANPELSFQENETSALIRQADRRRWSALDGLGIRYRHPVARTGIV  
AEVAGAGQPVVLRGDMDALPVQEASGLPYSSRRPGVMHACGHGHTAMLLTAAKALKA VEGQLRGTVRLL  
FQPAEEGGGGASFMVADGALEGAFAAFGMHVNPAAPTGTVHAKSGATFAAADRFVSVIRGVGGHAGMPHK  
ARDAVLAASMAVVALQPLLREVNPLEGGVTVSRFNTGEGAPNVIPERVTLSGTIRAFSDPIFAQLRQR  
VTAVFTSTATMYGCNATVEWSPMPYPLITDAGMTALALGSAKVVVSGNAVEIFEPYMYAEDFAFLAAK  
VPSAFLMLGIRNDTAGSVHGLHTPQFRLDEAALPLGAALHVQFALDFLRSRQQGAGGGAGGAAAAREEL\*

>Chlre3\_105119\_e\_gwH.32.61.1

LLSRAQAIQNWLVETRRLHKLPEPGFQEFKTHSAIRRVLAEHNIPYKFPYKGTGIVAFIGEGKPVVGLR  
TDMDDLPIHEPAGGSGGAGGFQSENEGVMHACGHDAHMTMALGAAKLLKAAKDAGELPPGTVNIVFQPAE  
EDGAGDVMIQEGAVDDTDAIFGMHVMPLPSGTVHSRAGTIMAGALSFRVVVQGRGGHAAMPHLNVDPV  
VAAAGLMSALQTVVSRETSPLGSGVLSITMLRAGDAYNVIPDEVFMFGGTIRGLTHEHLMFMKRIEEMAP  
AIAAGYSCNATVDWRLDEQPYYPPTVNDESMAAFALKTAAKLFGPEAAQIAEPLMTGEDFAFFCRKIPCA  
LSFLGIRNESAGSVHALHSPKFTLDESVLKGAAMHVTTAVDFLRAFAVEALEGQE

>Chlre3\_110181\_e\_gwH.940.4.1

ADHPDFDGTNLIFQPDENLGCARAMIEDGLFERFPCDAVFALHNMPGVPAFTFRVLPGPVSLSSDVAD  
VTIKGVGGHAGMPHRARDPIAASAAIVTALQTVVARNVAPDDTAVVSVGFIRGGATHNVIPESVTIGLNV  
RAGRPETRAMVEQRIREIVSLTAQAHGVEAQIDYRQLTPPMVNAEAEQLAQRVCAELVGAENV

>Chlre3\_123463\_e\_gwW.87.4.1

VRRWRRDLHMPELSFQEHNTSAYIRAQLDALGIPYTYPLGVTGIRAVLSGAGGDAGPTVALRADIDGLP  
ITEHADLPYTRTPGRMHCAGHDSHAAMLLGAAKLLKARESPLGRVLLFQPAEEGLGARALIRDGA  
VADVEAIHGLHVLDPDPSGIIGTRPGTIMAASDRFEFVVRGLGGH GALPHTRDPVAAAAVVTALQTLV  
SRETSVDAAVVTVSRFNTGPGAA NVIPESVELQGTVRALTQATFERLHRRLEEVAAGVAAA YGCSVTNV  
SWSEVYPPTVNEARMVELVLDVAEELLGSEAEAEERVRVIEPLLAEDFSFYGGVVQAAFTFLGIGDPA  
KGTNAGLHTPRFQVDEEQMPLGAALHAAVA VRWLQDRAAAA

>Chlre3\_52917\_gwH.2338.3.1

MTIEPLNLVRIIRQFHESPELALKEFQTHALLSVIRSLPQNLEIKTIPELPTALLVRVAGSHPHRTIG  
YRADIDALPVNEKTGLDFASKTPGIMHACGHDIHMTVALGILEYFANHQPQDNLIFFFQPAEESHSGSVR  
AFNANIFTNQFRPNEFYGLHSTPTLPAGVIGCRMGTFLFAGTTEVNLKLTGKGGHAAAYPQDANDMVVAQAY  
LITLQQTIVARNVNPIEGGVLTLGKVSAGNVRNVIADQAVIEGTIRGLTQKMILLIQR

>Chlvu1\_31191\_e\_gw1.12.204.1

MLDASRLATFLLVLYTSSLATFCAGTGGSLRVSVEEAASIQPWLVLGRRQFHQVPELMYEEIETGKLI  
RQTLDDLGITRYQIYDSFTGIVASIGPKSPSVLVALRADMDALPINEQTGLAFSSKVPKGMHACGHDSHV  
TMLLGAAKLLKAHEKDLPGGVRLIFQPAEEGGAGGDLMVKEGAVKDVAAIFGLHVYPFLQSGALASRAGP  
LMGACQGFIEIRITGAGGHAAMPHTVDPIVAAANTISALQVLSRETSPLGTAVVSVTKIAAGEGAYNVI  
PDSATFGGTLRSLAHEHLMYKQRMEEVKAQAQSHKESATVDWLEKKEPYYPPTVNDRAMYNFAVDVGK  
RLQGDFFLEDFEPTLGGEDFSFYGHAGVPAFTFLGIQNETAGSVHGLHTPRFMLDDEEVLQTGAAYLASLA  
SEYLVQHQAAPAGNEEL\*

>Chlvu1\_70304\_fgeneshCV\_pg.C\_scaffold\_1000063

MAILVFTGGPAQSSASPKTLQEAELMPYLQELRRHLHTIPELMDLPKGTGAYIRLQDLKLGISYKYPEE  
VAVDFKSTHDGKMHACGHDTHTMTLLGAAALLKAREGDLGGTVLLLFQPAEEGGAGGKFFVEEGALEGVS  
GIHGIHVWPDLPAGVVASRDGTLMAAADRFFVNITGRGGHAALPHLTADPVVAAAIVTSLQPLVSRSTS  
PTDAAVVSVRFNTGEGASNVIPDSVSMAGTLRALTTSHFVHMRKRVTKVIEGTAEHLGCTASVRWSEQA  
YGPVNAPELVSLLEGVAGQLVGS DRWHRLPEPTMAAEDSFLADAVPGVFTFLGIRNETAGSVHGLHTA  
QFQMDEAQMPLGAALHASVALNFLSKHGRGKPGREEL\*

>MicpuC2\_3364

EYVIKLRRELHLHPELMWTETKTSALVKRELDLLGASHVEISPPGVVATIGDGASPVLLRADMDALPMR  
EESAIPPNNRSTRDGMHACGHGHDGHVAMLLGAAKVLQMAEMGSLPPGTVRLAFQPAEEGGAGARRMLED  
GLDDLRPPTQSSFALHNWPYPETPSGVVTRGGTIMAGSGSFEIAFTGAGGHAAVPHKNVDVVVCGANAV  
IALQTIIVSRLVDPLDSAVVSVTVFQAGGAASNVMGDVATLRGTFRALS KKTFEWLHQAITKIVVSTATAH  
GCAVVEYFPVSGGVRHEEYPTVNDVDAAKFAAGVGAAMFGADA VDVDEVPMPAEDFSFFAERWPSAMM  
WLGSYNVSAGATHALHSTKYVLDESVLHRGVAMHAGYAVFL

>MicpuC2\_50101

MARARV GALLCVFLATTRV ASRGAASDDARVARDDDDDDDDAPSRLRNLQTS LADEAYVVRVRE

LHRAPETMWNERATSSIIKRELTMTGIAHVDPSPGPGVGVVGDGSDPVLLRADMDALPLHEQSDIPLAD  
RSQTPGVMHACGHDGHVAMLLGAARALARMRDERALPPGTIRFVFQPAEEGAGGAKMLRDGLLAMTPPT  
SVAFALHAWPYPETPGTIGTRPGTIMAGSAAFEITTTARTAADAVACGAAVVVETQSVVARRADPLASA  
LVTVTAFESSGEGEGEDAGSGVAVLRGQFHAMDEATFATTRAGIESVADGAAAARGCDASVNFSPIA  
NGSPFPRVEYPTINDARVAIASDVASEMFGEAVVDRNVAAVMPAEDFSFFARRWPSVMMWLGSYNVSA  
GATHPLHSSKYVLDEGVLRHGVAMHVGFVAVRYLEAGES\*

>MicpuN2\_79058\_e\_gw2.02.962.1

MLLFAAICAASHVTSADEACRDGTCASNLNDRKVLTVSEVDADYVVRMRRELHLQPELMWTETKTSAL  
VKRELTAFGVSFEEVSSPGVVATIGSGSAPVVALRADLDALPVTEESDIPAERRSQVPGKMHACGHDGHT  
AMLLGAAKVLKSVESLGRGTVRLVFPAAEEGGAGARRMLEDGLRAMKPIESSFALHNWPYPETPSGTVG  
TRSGTIMAGSGAFEIYLRGAGGHAAPVPHKNVDVVVCGAAVVMAMQTIVSRLTDPLDSALVTVTVFDAGGD  
ADNVMAADTARLMGQFHAVNKRITLWIGHAIVKEATGTAKAHGCEAAVTFPVLDPDGNVREEYPTVNDVK  
AAALASSVATGMFGAEAVLDVAPVMPAEDFSFFAEWPSMTMMWLGAYNVTAGATWPLHSGRYVLDESPLY  
RGVAMHVGYATEFIAKGFDER\*

>MicpuN2\_89067\_e\_gw2.16.313.1

MKLRAVLLAAICVAPHVAVRADDACTDETCASHLNDLRGVLANAEDVADYVVRRLRRELHLQPELMWTEH  
KTSAVVKRELTAMGVSFEEISAPGVVATIGSGSAPVVALRADMDALPVTEESDIPLERRSQIPGRMHACG  
HDGHTAMLLGAAKVLKSVPELGRGTVRLVFPAAEEGGAGARRMLEDGLRVMTPIESSFALHNWPYPETP  
SGTVGTRSGTIMAGSGSFEITFTGAGGHAAPVPHKNVDVVVCGAAVVMATQIVSRLTDPLDSALVSTTIF  
KAGGEASNVMGDRAVLAGTFRALDKRTFEWLHGRIEHAATGAAHGCDDVNVDFFPVSNVGRHEEYPTV  
NDARAATLAREVATSMFGDDAVVDVAPVMPAEDFSFFAEWPSAMMWLGAYNVTAGATWPLHSGRYVLDE  
SVLHRGVAMHVAYATEFMSTGFRG\*

>Ost9901\_3\_31131\_eugene.0400010207

MLRALFFLAHVPAALALDATTLRDIAASSNVDAEILSQRATHDYVVDLRRREIHKNPPELMWTERATAD  
VIARELDAHGIEYDRVTSTGIVARVGRGERSVGLRADMDALPLREDTGLAYASENDGKMHACGHDGHVAM  
LLGAAKVIKARYDADETSVPGVVRFFIQPAEEGGAGAKEMLRPSDGTGMLDLKPIESVFLHNWPYPPE  
MPSGTMGTRGGTIMAGAGSFDVVVGRGGHAAPVPHNNVDVIVAGSAIVTALQTLVSRLTDPLDSVVISVT  
VFNSGTASNIMPDTASLQGTLRALNPKTFKFKQKIADMASAIASAHGCTAATSEPEHNGVKRIPYPT  
VNDPRAAGLAMNVAAQLFGSESTRDVPVMPAEDFSFFGETYPSAMMWLGAYNETAGATHPLHSTKYILD  
ESVLTSGVALHAMYALEFLHSGL\*

>Osta4\_8357\_fgenesh1\_pm.C\_Chrom\_04.0001000032

MLARVTLVAVYATVVAADATDVSSVTVDVSSSLTRDVLDRARNVKSIVQVRRRIHQPELMWEEHT  
MSFIERELDALGITHERITATGVVATLGARRSVGLRADADALPLTEDTGLAYASKTEGKMHACGHDGHV  
AMLLGAARVLKEVHDEDPGRFRARCSSFNRRRRAALGQRKWMVDFDPPIQSVFGLHNWPYPPEMPSGTAG  
TRGGTIMAGAGEFVIDIAGRGGHAAPVPHKNVDVIVAGSAIVTALQTLVSRLTDPLDSVVVSVTVFNAGTA  
SNIMADKATLRGTLRALNPKTFALMQQKVVDMAAATAVAHGCEASTSFEPEQYGGKRVYPTVNDPQAA  
QLAMNVAQVGAENTRDVVPVMPAEDFSFFGQTYPSVMMWLGAYNESAGSTHPLHSPKYILDENILNTG  
VALHAAAYALSFLKNGFA\*

>Phypa1\_1\_158291\_e\_gw1.8029.3.1

MNRSELIQLAQLQAQLSARRDLHQHPEIGYEEHRTSSIVAEHLESGLLEVTRNVGKTGTGTLRGETD  
GPTFALRADMDALPIQDQKAVEYRSQVEGKAHLGHDHATSILMGAAQLLTGLGRPKSGNIKFIFQPAEE  
GLAGARAMIQDGVLENPKVDAIAGLHMTPGQDTGTLGVSQGVAFASADPLIIVFGKGGHAARPHEGIDA  
IAVSAQVITALQNVSRMVDPLEPAVVTIGKITGG

>Phypa1\_1\_158348\_e\_gw1.9535.2.1

MEFAGGLREELVRIRRDHLRHPPELLYDVVRTSGIVAGLLESWGIEVRRGVGKHFVGMVGTGLHGTGGSGP  
TLLLRADMDALPIQEENDAEYRSIHEGVMHACGHDAHTAMLLGAARTLAHRHRIRGTIRFVFQPAEEGA  
LRSPLDGRLLSGGRDMIEDGVLDGVDQCFALHVMPELPGVTLGVHPREAMAASSHFTVRFQAGSGHHSAP  
HQAVDALQMAARFVTEVNGLMANRVNPAEAAVLAFTLHAGSANNVIAADSELRGTFRAFRRKETVAATE  
GLRRLAATIAEAAAGGSYAMELREGIAVVNDEAAVRRIMAAARQVLGEEQVSYLDPPSLAGEDFGWYLDREV  
PGAF

>Selmo1\_104527\_e\_gw1.29.779.1

MSYFLWFLVLLASASDAANVELSQDWIKVRRRIHENPELGFDLVETSALVRSELNAMGVAYRWPVAVS  
SGVVASVSGSDRPFVALRADMDALPIQEAMEWEHKSVPGRMHACGHDAHVAMLLGAAKLLTLHQEQQLQG  
TVLLIFQPAEEGGGGGKMMVEEGALGDAEAFGIHVSTEYATSTIAAKPGVLKAAAGSFEAVISGKSGHA  
ADPHLAVDPILAASATVMSLQQLVSRFHPDLSQVSVVTKFHSGSSFNVIPDHVVIGGTLRAFTDENFMK  
LKQRIEQVIAQAEVYRCSAQVSMFEPSPATVIDEEAYQLVRDVAASDMLGGSNVFVAEASMKGEDFAFY  
LQQVPGAYIYLGIRNETLGSVHPNHTPHFTVDEESLPLGAALLTAVAKEFLRRKSSEAKPRMTPSWLFQY  
RK\*

>Selmo1\_105028\_e\_gw1.30.368.1

MWFHSLLSLLLLVPLRSIRAHQECPSSSAGDAAIANSTLSSIGDGEDIREWLVGIRRIHQPELGFQEF  
ETSAIRAELDALGVPEWVAVGTGVVATIGTGGPPIVALRADMDALPLQELGNSYKSVQVAGKMHACGH  
DAHVAMLLGAARLLSRPAAVPRGTVRLVFPAAEEGLYALAMVEGGALGDAQAIFGIHVTSERPVTGASS  
RAGPILLAGAGFLTATITGRGGHAALPHKTIDPILAASMMVVASLQQLVSRESNPLESEVSVSTSIQTPDSF  
NVIPSTVTLKGTFRGYKKEGLERLKTREIQVITSQASVHQCSASVDISNLQPATSNDPPELHYHFFQGVAKD  
LLGEDKVTEMEPTMGAEDFAFYSDHVPTMFFFLGSGNDAEGFDNRPHSPYFDLDEDVLPIGAAMHAALAT  
NYIEKTATVSDI\*

>Selmo1\_141529\_estExt\_Genewise1.C\_30134  
MEAWAAEILEAANDPGTVEWVRSVRRRCIHRNPELGFEEHQTSALIRRELDGMGIPYRWPVAKTGVVATIG  
SGDRPIVALRADMDGLPIQEMVEWEHKSQVDGKMHACGHDAHLAMLLGAARILSRRRHLLKGTVLLLQFQ  
AEEGKAGAQVMVQDQALGDAEAIFFGLHVAPEAPTGIILRRGPCLAGSRAFEAEIKGRGGHAGCPDHTAD  
PIVAASFAVISLQPLVSRREMDPLGNQVSVTSISGGHTFNVPDPSVTLKGSFRSFSKEGMAKLERIQI  
IESQAAVHKCTARVVFADDRMPYPATINDDKLHDHASVWVATSLFGSHCVRNIPVMAAEDFSFYLERIPG  
MFTGLGIHSEAKGTTHFVHSGLFRMDEDMLPWGVAFQAAVAEAYINELQPPLGRT\*

>Selmo1\_409459\_fgenesh2\_pg.C\_scaffold\_10000357  
MSYFLWFLVLLASASDAENVELFQDWIKGVRRRIHENPELGFDFLVETSALVRSELNAMGVAYRWPVAS  
SGVVASVSGDRPFVALRADMDALPIQEAWEWEHKSVPGRMHACGHDAHVAMLLGAAKLLTLHQEQLQG  
TVLLIFQPAEEGGGGKTMVEEGALGDAEAIFFGIHVSTEYATSTIAAKPGVLKAAAGSFEAVISGKSGHA  
ADPHLAVDPILAASATVMSLQQLVSRFHPDLSQVSVTKFHSGSSFNVPDHPVIGGTLRAFTDENFMK  
LKQRIEQVIAQAEVYRCSAEVSMFEPSPATVIDEAYQLVRDVASDMLGGSNVFVAEASMKGEDFAFY  
LQQVPGAYIYLGRNETLGSVHPNHTPHFTVDEESLPLGAALLTAVANEFLRRKTSEAGQG\*

>jgi\_Selmo1\_421067\_fgenesh2\_pg.C\_scaffold\_49000088  
MEAWAAEILEAANDPGTVEWVRSVRRRCIHRNPELGFEEHQTSALIRRELDGMGIPYRWPVAKTGVVATIG  
SGDRPIVALRADMDGLPIQEMVEWEHKSQVDGKMHACGHDAHLAMLLGAARILSRRRHLLKGTVLLLQFQ  
AEEGKAGAQVMVQDQALGDAEAIFFGLHVAPEAPTGIILRRGPCLAGSRAFEAEIKGRGGHAGCPDHTAD  
PIVAASFAVISLQPLVSRREMDPLGNQVSVTSISGGHTFNVPDPSVTLKGSFRSFSKEGMAKLERIQI  
IESQAAVHKCTARVVFADDRMPYPATINDDKLHDHASVWVATSLFGSHCVRNIPVMAAEDFSFYLERIPG  
MFTGLGIHSEAKGTTHFVHSGLFRMDEDMLPWGVAFQAAVAEAYINELQPPLGRT\*

>Volca1\_59303\_e\_gw1.14.178.1  
MQVSTVSVLLIWLCAQYSCIAHQAYASYLEESNSPEIFDSSLKWRRELHTMPELYFSEFNSTQYIRAQ  
LDQLGPIYEPYIAGTGIRAGPLGELTDEDAPTIALRADMDGLPITEEDDVLKSKTPGRMHACGHDAHMA  
MLLGAAKLLKSRETSALALGGRVLLFQPAEEGMMGAREMIRGGA VRGVGAIHGLHVPALPAGVIGTRG  
GVLLAASDRFSFTVRGVGGHGAIPHARTDPVVA AAAVVVALQALVARETSPVDSAVVTVARFNTGPGASN  
VIPDAVHLSGTVRALTADTFARLHHRVEQMAAGVAAGYGCVDNMTWSEVPYPPTRNYHGKNVCLKTVWS  
GTVSGDQQLHGPPQLPTPNSPLAAFTFLGIGDPAKGTDVGLHSPRFRMDEDQLPLGAALHAALATEW  
I

>Volca1\_81528\_estExt\_Genewise1Plus.C\_240089  
MSALLLA VTAALAAVLQAQSLSP EEIFKRSEALQSWVIEQRREFHKTPEPGFTEYKTRSRIMRFLESQHI  
MYRYPFAKTGLVAYIGSGKPVVALRTDLDGLPILEPDGVVYKSNQNDGWMHACGHGDMAMLLGAAKLLKE  
ASDQGLPPGSIRIVFQPAEEGAGGDLMIREGALEDIEAAFAMHVMPHLSSGSIHTRPGTIMAGALSFR  
VTVRGRGGHAAAMPHLNIDPVVAAAGLISALQTVSRETSPLGSGVLSITMLRAGDAYNVIPDEVVFGGTI  
RGLTHEHLMFMKRRLEEMAPAVVAGYGCNATVDWRLEEQPYYPPTVNDERMATFALQTAATLLGTDQSQI  
AEPLMTGEDFAFFCRQVPCALLFLGIRNESAGSVHALHSPKFTLDESVLHKGVMAMHATLAVEYLKTFAVA  
PDASSAKASASAAATTTGGGGAAGDDEDEYDDDRVSKDEL\*

## NITs

>NIT1\_AT3G44310  
MSSTKDMSTVQNATPFNGVAPSTTVRVTIVQSSSTVYNDTPATIDKAEKYIVEAASKGAELVLFPEGFIGG  
YPRGFRFGLAVGVHNEEGRDEFKRYHASAIHVPGPEVARLADVARKNHVYLVMGAIKEGYTLYCTVLF  
SPQGQFLGKHKRKLMPSTSLERCIVGQGDGSTIPVYDTPIGKLGAAICWENRMPLYRTALYAKGIELYCAPT  
ADGSKWEQSSMLHIAIEGGCFVLSACQFCQRKHFDPDYLFTDWDYDDKEHDSIVSQGGSVIISPLGQVL  
AGPNFESEGLVTADIDLGDIAKLYFDSVGHYSRDPVHLTVNEHPRKSVTFVTKVEKAEDDSNK-

>NIT2\_AT3G44300  
MSTSENTPFNGVASSTIVRATIVQASTVYNDTPATLEKANKFIVEAASKGSELVVFPEAFIGGYPRGFRF  
GLGVGVHNEEGRDEFKRYHASAIKVPGEVEKLAELAGKNNVYLVMGAIKEDGYTLYCTALFFSPQGQFL  
GKHKRKLMPSTSLERCIVGQGDGSTIPVYDTPIGKLGAAICWENRMPLYRTALYAKGIELYCAPTADGSKWE  
QSSMLHIAIEGGCFVLSACQFCRKLKDFDHPDYLFTDWDYDDKEPDSIVSQGGSVIISPLGQVL  
EGLITADLDLGDVARAKLYFDSVGHYSRDPVHLTVNEHPPKPVTFISKVEKAEDDSNK-

>NIT3\_AT3G44320  
MSSTEEMSSVKNNTQVIGVDPSTTVRVTIVQSSSTVYNDTPATLDKAEK FIVEAASKGAKLVLFPEAFIGG  
YPRGFRFGLAVGVHNEEGRDEFKRYHASAIKVPGEVERLAELAGKNNVHVMGAIKEDGYTLYCTALFF  
SPQGQFLGKHKRKMPTSLERCIVGQGDGSTIPVYDTPIGKLGAAICWENRMPLYRTALYAKGIEIYCAPT  
ADYSLEWQASMIHIAVEGGCFVLSAHQFCRREFPEHPDYLFDNDIVDTKEHDPTVSGGGSVIISPLGKVL  
AGPNYESEGLVTADLDLGDIAKLYFDDVGHYSKPDIFNLTVNEHPPKPVTFMTKVEKAEDDSNK-

>NIT4\_AT5G22300  
MSMQQETSHMTAAPQTNGHQIFPEIDMSAGDSSSIVRATIVVQASTVYDTPATLDKAEERLLSEAAENG  
L VVFPEAFIGGYPRGSTFLAIGSRTAKGRDDFRKYHASAIDVPGPEVERLALMAKYYKYYLVMGVIERE  
GYTLYCTVLFQDQFLGKHKRKLMPSTALERCIVGQGDGSTIPVFDTPIGKLGAAICWENRMPSLRTAMY  
AKGIEIYCAPTADSRETWLASMT HIALEGGCFVLSANQFCRRKDYSPPEYMFSGSEESLTPDSVVCAGG  
SSISPLGIVLAGPNYRGEALITADLDLGDIAKLYFDDVGHYSRPEVFLNIREHPRKAVSFKTSKVM  
EDES-

>NLP1\_AT2G27450



METEGRRREVVVSSLQFACSDDISTNVAAAERFVSLSSSLPLSNYQSLPSSSSFKFPYAL  
VREAHAKGANIILQELFEGYFCQAQREDFFRKAKPYKNHPTIARMQKLAKELGVVIPV  
SFEEANTAHYNSIAIIDADGTDLGIYRKSHIPDGPYQEKYFNPGDTGFKVFQTKFAK  
IGVAICWDQWFPEAARAMVLQGAELFYPTAIGSEPDQDGLSDRHWRRVMQGHAGANVV  
PLVANSRIGKEIETEHEGSPQITFYGTSFIAGPTGEIVAEADDKSEAVLVAQFDLDMIKS  
KRQSWGVRDRRDPDYKVLTLTMDGNL-

>AT5G12040

MKSAISSSLFFNSKNLLNPNPLSRFISLKSNFLPKLSPRSITSHTLKLPSSTALSRSIS  
SSMASSFNPEQARVPSALPLPAPPLTKFNIQLCQLSVTSDKKRNISHAKKAIEEAASKGA  
KLVLLPEIWNPSYNSDFPVYAAEIDAGGDASPSTAMLSEVSKRLKITIIGGSIPERVGD  
RLYNTCCVFGSDGELKAKHRKIHLFDIDIPGKITFMESKTLTAGETPTIVDTDVGRIGIG  
ICYDIRFQELAMIYAARGAHLCCYPGAFNMTTGPLHWELLQRARATDNQLYVATCSPARD  
SGAGYTAGHSTLVGPFGEVLATTEHEEAIIIAEIDYSILEQRRTSLPLNRQRRGDL YQL  
VDVQRLDSK-

>PutativeNitrilase\_AT4G08790

MNAYSVSLDFTKPSLFRITLSSQIPLTMATTVNKTVRVAAAQMTSVNDLMTNFATCSRL  
VQEAALAGAKLICFPENFSFVGDKEGESVKIAEPLDGPVMERYCSLARDSNIWLSLGGFQ  
ERFDDTHLCNTHVVIDDAGMIRDYQKMHFLDVDVPGSSYKESSTVPGTKIVSVDSPV  
GRLGLTVCYDLRFPKIYQQLRFEQKAQVLLVPSAFTKVTGEAHWEILLRARAIEQCYVI  
AAAQAGKHNEKRESYGDTLIIDPWGTVVGRLPDRVSTGIVVADIDFSLIDSVRTKMPIDK  
QRVSIDL-

>AT5G64370

MDHMISENGETSAEGSICGYDSLHQLLSANLKPELYQEVNRLLLGRNCGRSLEQIVLPES  
AKALSSKHDFDLQAASFSADKEQMRNPRVVRVGLIQNSIALPTTAPFSDQTRGIFDKLP  
IIDAAGVAGVNLCLQEAWTMPFAFCTRERRWCEFAEPVDGESTKFLQELAKKYNMIVS  
PILERDIDHGEVLWNTAVIIGNNGNIIGKHRKNHPRVGDFFNESTYYMEGDTGHPVFETV  
FGKIAVNICYGRHHPNLWLAFLNGAEIVFNPSATVGESEPMPWPIEARNAAIANSYFVG  
SINRVGTEVPNPFTSGDGKQHNDFGHFYGSSHFSPDASCTPSLSRYKDGLLISDMDL  
NLRCQYKDKWGRMTARYEVYADLLAKYIKPDFKPVVSDPLLHNST-

>ChlNC64A\_1\_135828\_IGS.gm\_14\_00361

MSAKEEDVAVGDGSLGGFESVEKILEAYIPDPDLAHVQRILYGWNCGKPVAPLPLARELAAAAAANFDL  
QAYRFGAAPEQLRPLRIMRVGLVQHGIQLPTSAPFAEQRAIHTRVRLMDAAGAAGVQVLCLQEFWPCP  
FFCTRERQWLELAESAEEGPSTRLCQELARKHGMVVISPILERDEAHGGTIWNTAVVVGNSNGVIGKHR  
KNHITRVGDFNESTYYMEGNTGHPVFETAFGRIAVNICYGRHIPLNCQAFGLNGAEVFNPCATVEGFTE  
PMWGLLHVCHQPVGTEVYAPFTSGDGKPAHRVGGGGGGGGVLDLGPYFSSYVTPDASRTPSLARNRD  
GLLVADLDLNLCCQVQKDRWGFQMTSRYEMIAEQLARYVRPDFTPQVIRDPAL\*

>ChlNC64A\_1\_18182\_e.gw1.1.324.1

MTPPQELLQAPPRKVTVAATQMACSWDIEDNMKKAEGLVRAAAAQGANIILLQELFEAPYFCQEKKQEYY  
RLAKPVDNPLIPRFKLAELQVVLPIFFERAGAAHFNSLVVADADGSIVGHYRKSHIPDGPYQEKY  
YFSPGDTGFKVFKTRYADIGVLICWDQWFPEGARCAALMGAEILFYPTAIGSEPPNPSYSSYPHWARVMQ  
GHAGANMMPVVASNRIETEFESHITFYGGSFIAGPAGEIVAQPEQDEGVVATFDLECCSSNRAGWGM  
FRDRRDPDYGPATLDGSRNSRR\*

>ChlNC64A\_1\_34065\_estExt\_Genewise1Plus.C\_30252

MYGWNCCKPVAAVSLGPELAASAAAASYDLQAYRFQAAPEQLRPPRVVRVGLVQNSIHAPTTAPFVEQRO  
AIHDRVRQIVDAAGAAGVQVLCLQEAWHMPFAFCTREKQWTEFAESAAGPSTRLCRELARKHGMVIVNP  
ILERDEAHGDTIWNATAVVVGNNGNVIGKHRKNHPRVGDFFNESTYYMEGNTGHPVFETAFGKIGVNICYG  
RHHPMNWQGFGLNGAEVFNPSATVGESEPMPWVEARNAAIANSYVVGAINRVGTETFPNAFTSGDGK  
AHKDFGHFYGSSYFAAPDASRTPSLARNKDGLLVADLDLNLCCQIRDKWGRMTARYDMYAEQLGRYVVRH  
DFQPQVIKDPPL\*

>Chlre3\_116571\_e.gwW.1.243.1

MAAAAPGRKVVLAVTQFGMSEDRAANADKAEQYVRRAAAAGGQIVVLPFELFESMYFPMVHSEEFQLAAP  
FEGHPLVERFARLAAELRVVLTVSFFEVANTTYFNSCALVDADGTVLGRYRKSHIPDGPGRWKVFMSPG  
DTGLDVYDTAYGRVGLAICWDQWFPEAARALVLQGAELVYVPCIGDEPHDPANDSYPHWMRVQQGHAAA  
NMVPLLAANRVGREQLQGSGTPVTTYGGGFIAGPQQILAQLAELVTAEVDLAAGLATARAQWGLFRDRR  
PDLYGALMTKDG

>Chlre3\_117164\_e.gwW.18.105.1

MVRKVMLAATQFECTADKAANADKAEELVRKAAAAGANIILLQELFHGLYWCVAQDPFLSWAAPLEGHP  
LLARFGALAAELGVVLPVFFERHNAHFNSVAVMDADGSKGVYRKSHIPDGPYTEKFFYNPGDTGFR  
VFDTKYRIGIAICWDQWFPEAARALQGAELVYVPCIGDEPHDPANDSYGHVWRVQQGHAGSNLVP  
IVSNRIGAEERLPPHQAAAGNTFYGGGFIAGPQQVLAQVRCARGFCVAEVDLGA AAAAARAAWGVYRDRR  
PELYGALATLGGSRPPL\*

>Chlre3\_24136\_estExt\_fgenesh1\_pm.C\_10008

MAEGLAGFASLEELLEYYVPADKLLQAKRVIYGLNLGEPVGEQLDAGVLERAKAMGFDLRSALFRAAP  
EQMRPPRIVRIGLIQNKIVLPTTAPFAAQAQAIRDRVEVMLD TAGRAGVKVCLQEAWHMPFAFCTREKV  
WCEFAESAETGESVAFCAAAARRWGMVVVCPILERDAAHNDTVWNTAVVIGHNGNIIGKHRKNHPRVGD  
FNESTYYMEGNTGHPVFETAFGKIAVNICYGRHHPMNWQAFGMNGAELVFNPAATVGDLEPLWPVEARN

AAIANSYFVAGINRVGTESFPREFTSGDGKPAHKDFGHFYGSSYVAAPDGSRGPSLARHRDGLMVADVDL  
NLCRQTKDKWGFQMTARYDMYADFFAKFVKPDFKPVIRDPAL\*

>Chlvu1\_44878\_estExt\_Genewise1Plus.C\_190044  
MPGKREVTVACTQISCSWDKGDNLAKAERLVREAAGAGANIILLQELFETPYFCQDQKQELFELARPFEG  
NPVLRRFADLAKELQVALPISYFERANNSFFNSLAVFDADGTCAGRYRKSHPDGGCYQEKFYFNPBGDTG  
FQTFQTRFAKIGVAICWDQWFPEAARCMALMGAEVLFYPTAIGSEPQDPSLNSYPHWTRVMCGHAGANLV  
PLVASNRIGEEKAESGSIITFYGGSFIAEGELIDLTPDRKEGFAVATFDLEAIRWQRASWGLFRDRRDPDY  
GPILTLDGSSGKRSGAI\*

>Chlvu1\_74620\_fgeneshCV\_pg.C\_scaffold\_11000140  
MMENSIAVPSAETEALSKAAKDHIVFCIGCSERVTSVSGPGRGTLTYNTQLTFGADGQLLNKHKRVMPTMAE  
RIWWGQGDGNSLHAVETAAGRIGALICWEHWMPLTRAALHATSSEDVHVAAWPRVTEMNLLASRHYAAEGR  
CFVIAVGALLRRRDLALADSSVLPEDPDALLLDGGTTIIGPDGKILVGPVMDEETLVMAELDFTRIAEES  
LALDVTGHYSRPDIFQLTVNGNPLQPS\*

>MicpuN2\_107980\_est\_cluster\_kg.Chr\_03\_\_137\_\_3200336:1  
MIDAAGAAGVNLVCLQEAWTMPFGFCTREKYPWVEFAEPAEDGPTTRLIQRKARQWNMIVVSPILERDER  
HGGTVWNTAVVISNNGRFLGKHKRNHPRVGVDFNESTYYMEGNTGHPVFETAFGKIAINICYGRHHPNHW  
QAFGLNGAEIVFNPSATVGGLEPMWSIEGRNAAIANNYYVASINRVGTEHFPNKFTSGDGGEAHNDFGH  
FYGSSYVAGPDASRTPSLRSRDLGMLVCDVNLGLCRQVVKDKWGFQMTARYDMYAEFFRKFTDMNYEPQVI  
RDPSLDSEEDFNF\*

>Phypa1\_1\_204180\_estExt\_Genewise1.C\_190023  
MGPDRVVGVAALQFACSDDESNSKAETLVRAHAQGANIVLIQELFEGYYFCQAQREDYFARSHPREG  
HPTIERMQRLAKELGVVIPVSFFEEANNAHYSIVVIDADGTDLGVYRKSHPDGGPYQEKFYFNPBGDTG  
FKVFKTKFATIGVVICWDQWFPEAARAMALMGAEVLFYPTAIGSEPQDGLDSSEHWRRVMQGHAGANLV  
PLVASNRIGQEIIETERGSKIAFYGTFSIAGPTGEIVASADNKSEKVLVAKFDLNKIKVKRHSWGIFRD  
RRPELYKVLTLSDGQL\*

>Phypa1\_1\_213956\_estExt\_Genewise1.C\_960040  
MENEPASATKDGSLHGYESLHRLSSELPHLQFQVSRVLYGCNRGSAVTPVPQTEDLSAAAKEGNFDVQ  
TFEFTADLEQMRAPRNVCGLIQNAIVLPTTEPFLKQKHAIMERVTSLIESAAKAGVNLCLQEAWTMPF  
GFCTREKRWCFAESAEEAGESTKLLQGLAQRYNMVIVSPILERDESHGSTIWNATAVVIGNHGNVIGKHKR  
NHPRVGVDFNESTYYMEGNTGHPVFETEFKIAVNICYGRHHPMNWQAFGMNGAEIVFNPSATVGDLSPE  
MWPIEARNAAIANSYFVGAIRNVGTEVFPNEFTSGDGKPAHKDFGHFYGSSYVAAPDASCSPLSRCRDG  
LLVAKLDLNLCCQLKDKWGFRRMTRSRIDMYADFFREYVQHDFKQVIHDSYLDGLPAMNSRTT\*

>Phypa1\_1\_88254\_fgenesh1\_pg.scaffold\_167000045  
MAESKEAVIAEVEGMGALGTRSVRATVVQASTIFDYTPATLEKAERLIADAAAQGSQVLVVFPEAFIGGYP  
RGNTFGVIGTRTPKKGEDFRKYHGSVIDVPGPETDRLAALAGRYKLSLVMGVIERAGGTLYCTVVFSDS  
GGEYLGKHKRKLMPATASERLIWFGDGTLPVFDTSVGLKGAVICWENRMPLLRRTAMYGKIELYCAPTAD  
ARRSWQASMIHIALEGGCFVLSANQFCRRHDYPPAPEYIYSGLGETEPGPEEVV CAGGSVIISPAGTILA  
GPNFDGEALITADLDMTIDIVRAKDFDVFVGHYSRDPVLSLIVRDQPCHPVTFTSDLLSPMGGKT\*

>Selmo1\_142105\_estExt\_Genewise1.C\_40076  
MILGLNNGSVVGMPLPPLPAPVAMMSTAADFDLQAYRFTAEEELRAPRIVRIGVIQNAIVLPTDAPFADQK  
RAIMKRVGDLIEAAGTAGVNILCLQEAWTMPFACTREKTWCEFAESAEEGTSTKFLQMFACKFKMVIIS  
PILERDEVHGGTLWNTAVVIGNNGNVIGKHKRNHPRVGVDFNESTYYMEGNTGHPVFETAYGKIAVNICY  
GRHHTLWQAFMGNGAEIVFNPSATVGDLEPMWPIEARNAAIANSYFVAANRVGTEVFPNEFTSGDGK  
PAHKGFHFYGSSYVAAPDSSCTPSLRLQDGLMVVDADLNLCCQVRDKWGFRRMTRARYDLYANFFNEYTK  
HAFKQVISDPLLHSGLEAHS\*

>Selmo1\_171766\_estExt\_Genewise1Plus.C  
MEEIALVPASLPEVDMAAFPASNWVRASVVQASTIYGDTPATIAKAEKLIAAAAATLGSQVLVVFPEAFLGG  
YPRGSTFGTAVGYRSSQGREEFRRYHSCAIDVPGPEVDLAAAAAKFRVNLVMGVIERSGGTLYCISLFF  
DSQGVFLGKHKRCVPTAAERLIFGYGDGSLPVYKTELGRVGLVCWENRMPLLRRTALYAKGVEFYCAPT  
ADSRETWQATIRHIAVEGGCFVLSNQCFCRRRDYPPSPDYTFAGFAEESPDKVVCAGGSAIISPSGDIL  
AGPHYEGEAVLSADLADVGEIIRTKFEFDVVGHYSRPEVLSLTINEKQYVPVTFVPDEKRADYKLGAEAGS  
PMLP\*

>Selmo1\_269334\_estExt\_fgenesh1\_pm.C\_850010  
MESREVSVSSLQFACSDRADENVATAERLVREAHSRGANIILLQELFEGYYFCQAQREDFFLCSKPREGH  
PTIQRMKELAKELGVVIPVSFFEEANNAHYSIVVIDADGTDLGLYRKSHPDGGPYQEKFYFNPBGDTGF  
KVFDTKFARIGVAICWDQWFPEAARALMGAEVLFYPTAIGSEPQDGLDSREHWQRVMQGHAGANVIV  
LVTNSRIGVEVVEHTEHGASKITFYGHSFIAGPTGEIVAEADDKNEAVLVAKFDLNQIKLKRQSWGVRDR  
RPDLKYVLLTLDGKV\*

>Volca1\_120915\_estExt\_fgenesh5\_synt.C\_200044  
MVRNVVLAAIQFACSEDKQANADKAEYLVRQAAAAGAIIILLQELFERQYWCQVQKEYFSWAAPFEGNP  
LVSRFAKLASELRVVLPVPPFERANNA YFNSVAVVDADGSLGLYRKSHPDGGPYQEKFYFNPBGDTGFR  
VFDTKYGVGIAICWDQWFPEAARALVQGAEVILYPTAIGSEPQDADINSYPHWIRAQGLHAAAANLVV  
VASNRIGTEELPGGSPTSYYGGSFIAGPQQVLAQVGAELHHGNPDPHPQVVEGFVTASMDLDLVALER  
AAWGVFRDRRPELYGTLATLSGHKP\*

>Volca1\_66898\_e\_gw1.60.61.1  
MADGSLAGFATLEELMEEYIPPEKLQARRVLYGVNMGQLVTGMALDLALCERAKLMDFDLRSVAFRAAP  
EQLRPARIVRIGLIQNKVILSTDAPFAEQQAIRDRVGMLETAGQAGVKKVCLQEAWHMPFAFCTREKR  
YCEFAESAETGESVAFCAARRWGMVVICPILERDAHSDTIWNTAVVIGHNGNIIGKHKRNHPIRVGD  
FNESTYYMEGNTGHPVFETAFGRIVNICYGRHHPMNWQAFGMNGAELVFNPAATVGDLEPLWPVEARN  
AAIANSYFVAAINRVGTEVPNEFTSGDGKPAHKEFGPFYGSYVAAPDGRSASLARHKDGLLVADIDL  
NLCRQTKDKWGFQMTARYEMYAEFFNRVFPDFKQIVRDPPL\*

>Ost9901\_3|39332|e\_gwEuk.12.237.1  
MPRGRHRIACAQMTSTADFQHNLTQVTELCKRAKAEACEALFLPEAFARIGATDASYAEPLDGPVIRACC  
ALAKEYGLWMSLGGYAERDGDGRKRFNSHVMIDPRSGEISGDVYRKIHLFDTDAAVGVDDGGMRESYTR  
AGTTLASYDITTFGKVGASICYDLRFPDYYQALRFEHEADVICVPSAFTKSTGQAHWEVLLRARAIETQCY  
VVAAAQAGKHGETRESYGHAMVIDPWGRIVAKMDDPSNEVGIAVAEIDLALVDSIRTQMPLAEHRRRVRA  
EF\*

>MicpuC2|44624|fgenes1\_pm.C\_scaffold\_9000024  
MCATDDVEANFRTCEKLATLASDAGCAMLFLPECFAFIGRKGEDALAIMPLDGLMTRVYRDLARAKNIW  
LSLGGFPELGPDAQHRLNAHVLVDADGEIRASYRKIHLFDVDVPNGPLLMEKSTASPGSEIVAADSPIGR  
LGMICYDLRFPFLSALRYECGARVMLVPSAFTRPTGAHWEVLLRARAIETQSYVIAAAQCGVHSEGR  
ASYGHSIIVDPWGEVIKLDDEPDEGVIAVAKIDLRGLEETRAKIPIETHRRGLGDRTAFFVTIAEM\*

>MicpuN2|96425|fgenes2\_kg.C\_Chrom\_06000040  
MEPPPKRAGVSKAAVGMQRATNDLEANFETCSTLASAAAQGCSSILFLPECFAYIGIAGNDALAVMEPLD  
GPLMAYRQLAKDTGVWLSLGGFPETGPDADHRYNTHVLVSDGDVRSYRKIHLFDVDIPNGPVLMEKST  
TASPGDAIVAADSPIGRIGMTVYDLRFPFLSALRYECGARVMLVPSAFTRPTGAHWEVLLRARAIET  
QSYVIAAAQAGVHSEKRESYGHAMVIDPWGKVLAKLEDPDNGIGIATADIDLGYLEDVREIPVDKHKRRK  
LETFEATVEKE\*

>Osta4|20335|e\_gw1.12.00.243.1  
MAAPTSPPAVAADARSNPTRGRTRVAVAQMCSTEDVEANLSTCAELARRAAELECVALFLPEAFARISR  
SGKASIAEAESLDGPVIRACAAMAREHGMWMSLGGVAERDDAGGDARRRNTHVLLTPLGTIHGEPYRKIH  
LFDAAEGVGVGGGLMESEWTAPGRELTSHATDFGTGVSVCYDVRFPDYYQALRFEHGDILIVPSAFTK  
ITGRAHWEVLLRARAIETQCYVVAQAQGRHSETRESYGHAMVIDPWGEIVAKLDDPEEGVIAVGEISL  
EYVDEVRKMPIASHRRPVRRNFNFTLG\*

## PAIs

>AT3G07930  
MVPPIIYKYKRRKDRRLGRDDSSVMMTRRRPDSDFIEVSDENRSFALFKEDDEKNRDLG  
LVDDGSTNLVLQCHDDGCSLEKDNSNSLDDLFSGFVYKGVRRRKRDDFGSITTSNLVSPQ  
IADDDDDSVSDSHIERQECSEFHVERRVSPYFQGSTVSSQSKGCDSDSVCSKEGCSKV  
QAKVPRVSPYFQASTISQCSDIVSSSQSGRNYRKGSSKRQVKVRRVSPYFQESTVSEQP  
NQAPKGLRNYFKVVKVSRVYHADGIQVNESQKEKSRNVRKTPIVSPVLSLQKTDVVYLR  
KTPDNTWVPPRSPCNLLQEDHWHDPWRVVICMLLNKTSGAQTRGVISDLFGLCTDAKTA  
TEVKEEIEENLIKPLGLQKKRKMQRSLSEYLQESWTHVTQLHGKGYAADAAYAIFCNG  
NWDVRKPNHMLNYYWDYLRIRYKL-

>PAI1\_AT1G07780  
MSTGISTDLHVHFGALNFSKTYKSGLSNRTVSFSRVGYAQRNKLSCSVSNTENVAPKDDERGGKDRPLVKM  
CGITSARDAAMAVEAGADFIGMIWPHSKRSISLSVAKDISKVAREGGAKPVGVFVEDDENTILRAADSS  
DLELVQLHGNGSRAAFSRLVRKRRVIYVLNANQDGKLLNEVPEDCHLADWILVDSATGGSGHGFNWAQF  
KLPSVRSRNGWLLAGGINPTNVSEALSILQPDGIDVSSGICGTDGIQKDKSKISSFITAVRSVHY-

>PAI2\_AT5G05590  
MSTGISTDLHVHFGALNFSKTYKSGLSNRTVSFSRVGYAQRNKLSCSVSNTENVAPKDDERGGKDRPLVKM  
CGITSARDAAMAVEAGADFIGMIWPHSKRSISLSVAKDISKVAREGGAKPVGVFVEDDDNTILRAADSS  
DLELVQLHGNGSRAAFSRLVRKRRVIYVLNANQDGKLLNEVPEDCHLADWILVDSATGGSGHGFNWAQF  
KLPSVRSRNGWLLAGGINPTNVSEALSILQPDGIDVSSGICGTDGIQKDKSKISSFITAVRSVHY-

>PAI3\_AT1G29410  
MSTGISSDLHLHPRALNFSKTSKSGLSNRKVSFSSVGYAQRNKLSCSVSNTENVAPKDDDRGKDRPLVKM  
CGITSARDAAMAVEAGADFIGMIWPHSKRSISLSVAKDISQVAREGGAKPVGVFVEDDENTILRAADSS  
DLELVQLHGNGSRAAFSRLVRERKVIYVLNANEDGKLLNVPEEDGHLADWILVDSATGGRYLDQLLSFF  
ALSHCNVFLRGTSYITITLVHETVCLSQVTEISRV-

>ChINC64A\_1\_11532\_gw1.11.180.1  
QPVIKVCVGTNAEDAAAAAEAGANLVGMILWPRAKRIPATTARQVAAAARGGGAEPVAVFVDEDAATIA  
RVCECEVRIAQLHGDGARAALGLPPGLAAIIVLHADKAGRVQSALPPSPGTPRWLIVDSLQGGSGEAF  
DWRQLRAAAPDLAQHSSHGWLLAGGLTPDVAEAIATAAPTGVVSSGVCSPDGLKDKDLGKVKQRY

>Chlre3\_184947\_estExt\_fgenes2\_kg.C\_310074  
MAWTVSLHRTSALHRTGLAPKATCSARSPCIRTASAPQQRDGPLVKICGITNAEDAQHAVQSGADL  
LGMIMWQKAKRAVSADTARAIAAVARGAGAKAVGVFVDEDAATISARCRDAQIPIAQLHGDGARAALPDL  
DPTLEVYVVLNCPDGTPLTPPSELLRGLGRAGARLPDWVLDVSAQGGSGQALDWRNLKVPHEARQGW

LLAGGLNPDNVATAAGLAQPSAVDVSSGVCGPDGLKKDHGKVSSFISSAKAVKYH\*

>Chlvu1\_25314\_e\_gw1.2.603.1  
LIKICGVTSAEDAELAAAAGANFIGMIMWPKAKRSVAPAVAQAIAAVAREHGAQAVGVFVDEDEDARTIEHR  
CREAGIGVAQLHGDVAREAVASLPEFLQIIVLHADSDGHLLVRTSPGERQSVIEWVLVDGIVGGSGEKFD  
WANLQPPKQVAQRGWFLAGGLGPHNVAANAQQLHPNGVDVSSGVTPGDKLRKDAAKIHAFVSSVQQLSES  
PQTA\*

>MicpuC2\_63121\_est\_orfs.10\_2104\_4278469:1  
MSSAAAAAFAFSASAPRRLASRAATARAPTARRAPRATVRRARSADAKRRRSAAASVVVRADAAADGPNKS  
PLVKVCGVTSAADATHAARAGADFGMILWPKSKRSISLDVAKEVAAAAARADGAVPVGVFVDETAEEIVA  
ACEAAGIDHAQLHGDGARASLVDLPMKIKAIYVYNASADGAIATPMPGDEAKLTDQRNEALKKEKGWRAA  
IDWVNGPRRTVDWLLIDGVNAGSGEAFEWGNLKVPRGVSRKGWLLAGGLTPENVAEAVGCVGRSRLLSA  
RSPSLDDFFSFAFASRARCEPHDLTRGDAISQ\*

>MicpuN2\_103599\_fgenesh2\_pg.C\_Chr\_12000311  
MAAKDEKKTLLVKVCGVTTPEDATQAAVAGADFIGMILWPKSKRSIPLDVAKEVADAACAAGATPIGVFVD  
ESAEIIVAAACEVAGIDHAQLHGDNARAALTDLPMKIKAVYVVSAAKDGAIVTPMPGDEEKLCEDRRTKLS  
GAGGWKAAIDWVNGPRRTIDWLLVDGVAAGSETYDWTNLRVPRGCSRKGWILAGGLDPENVTDAIGACK  
PTAVDVASGVADEGGVKKDPVKVDAFIANAKSASMEMA\*

>Ost9901\_3\_6627\_gwEuk.11.334.1  
KPIVKVCGITTVRDCESACEHGANFVGMILWPKSKRSVDEATAKEIVACAKAKGAVPVAVFVDEDEASEIT  
RVCDAGICDHAQLHGDGARDALLETPLMRLKAIWVLNADANGQIVSKFPGDEENGPRRVVDWLLIDGVNAG  
SGTAFDWSKLLKAPRGASRKGWLLAGGLNPENVAQAIETANPTGVDVASGVADEGGVVKDAAKIAAFIGNA  
RAA

>Ostta4\_19960\_e\_gw1.11.00.255.1  
MSTATRARARADDRDRAVVKVCGITTVEDCVACASGADFIGMIAWPRSARSVTRDAARAIADAACKTHGA  
IPAVFVDENAEIITAMCDAIGCDHAQLHGDGARALETPLSRKAIWVLNADADGKIVTKLPGDEENGPR  
RRVVDWVLDGVNAGSGITFDWSGLKPPRGCSRKGWILAGGLTPDNVASAIDQLHPNGVDVASGVADEGG  
VRKDEAKVKAFIENARNAASASA\*

>Phypa1\_1\_17202\_gw1.68.130.1  
RPLIKMCGITSPEDAAVAAARAGATYIGMIVWPKSKRSVTVSLAQEIAAAAARENGAEPVGVFVDEDAEQIE  
RACNDAKLGIAQLHGDGARASLLQGLPESLKVIVLHANKNGIITKFPESSEGSPLVDWVLDVSLQGGG  
GEQFDWRNFRAPSMQSRRWLLAGGLTPSNVATLSTLTPNAVDVSSGIAGPDGIRKDPARIQAFVHAVQ  
N

>Selmo1\_67644\_gw1.1.1792.1  
PVVKMCGITTPGDASRAAAAAGASYIGMILWPRSRSVSVISLAREIAAAAAREQGAVPVGVFVDEDAHTIAD  
SCREAGLDCAQLHGTGARAALDGLASSSSSLRVYVAHAGKDGSIQTPQPVAGAPVEWTLIDSIQGGSGE  
SFDWESLSRPLGFVVGKRGWFLAGGLKPNVGRAISLLRPSGVDVSSGIAGPDGIKDLDRIASFVSAVH  
N

>Volca1\_57561\_e\_gw1.8.302.1  
QICGITNPDDARHAVNSGADFIGMIMWQKAKRAVSADTARSIAAVAREGGARAVGVFVDEDAATISARCR  
DAGIPVAQLHGDGARAALPGLDPSLEVYVVLNCAPDGTPLTQPPSELLRQMGKPGARQPEWVLDVSAQGG  
SGQALDWRNLRVPAGEATRGLWLLAGGLSPDNVAIAAGLAKPTAVDVSSGVCGPDGLKKDPAKVSSFISAA  
KGVKYC\*

## PAT1

>PAT1\_AT5G17990  
MVIAVATTSSIVSGIKLSGILTSFNVAVDDASSCGRSNLGTGVRIFPTLSRRRFSSIGAVSPIRGAQSSF  
SRSSFACQNLGLSGGFSAAEALPPACANASPSIKSFNQLIETLIDRVLDSETEAESLEFLLNEANEA  
LISAFLLRAKGETEYEEIVGLARAMMKHARKVEGLVDAVDIVGTGGDGANTVNISTGSSILAAACGAKV  
AKQGNRSSSSACGSADVLEALGVVLDLGPPEGIKRCVEEGGIGFMMSPMYHPAMKIVGPVRKLLKIKTVFN  
ILGPMLNPARVSYAVVGVYHKDLVVKMAKALQRFMKRALVVHSCGLDEMSPLGGGLVYDVTPEKIEEFS  
FDPLDFGIPRCTLEDLRGGGPDYNADVLRRLVLSGESGAIADSLILNAAAALLVSNRVQTLAEGVTVAREV  
QSSGKAIKTLDSWINISNLAQKSQ-

>AT3G51050  
MRKRDLAILMLSGFAIFFTLQHEGDFAFKEAWFHLYDEYYPVKEYEADRLPPPIVADLNGDG  
KKEVLVAATNDAKIQVLEPHSRRVDEGFSEARVLAIEITLLPKIRVASGRRAVAMATGVID  
RYYKNGTPQKQVVVVVTSVGSVLCFDHNLKKLWETNLQEDFPNAAHREIAISISNYTLK  
HGDTGLVIVGGRMEMQPYNHMDPFEELGMTAQNADQHRRSATENQASEDSGAINLRHFSV  
YAFAGKTGLLRWSKKTDDVEAHTSDASQLIPQHNYKLDVHALNSRHPGEFECREFRESIL  
SVMPHRWDREDTLLKLAHFRHRKRTLKKQAGSKSTAYPFHKPEEHTPAGKDLRKRKIPK  
LIGKAARYAGSAKPKKGMQYIPTITNYTKLWVVPNVVVAHQKEGIEAIHLPTGRTLCKLS  
LLEGGLHADINDGVLVDHVQTVGGNVGERTVVSMSMEVLKPCWAVATSGVPIREQLFNVS  
ICHHSPFNFLHYGGDYSRHFAQARDTSTLEIATPILIPRDDGHKHKRKGSHGDVIFLTNRG  
EVTSYTPDVBHGHDAVWQWQLQTEATWSNLPSPSGLTESGTVVPTLKPFSRLIHDNQPMIL  
AGGDQAAVIISPGGSILASIELSPQTHALITDDFSNDGLTDVIVMTSNGVYGFVQTRQP

GALFFSSLVGCLLVVMAVIFVTQHLSNIQGGKPRSSSF-

>ChINC64A\_1\_27114\_e\_gw1.24.92.1  
SQVLEVLMMQRQDLSEQQTSEALQALVAGAEPQMAAFLVLLRAKGETAEIEIAGLAKAMRALSIPVHTSYD  
GKCWVLDIVGTGGDGIGSVNISTGATVVAAAAGAKVAKHGNRSVSSLCGSADVLEALGVAVELGPGGVSL  
CLEEAGVGFMAFYHPAMKTVVPRKSLRVRTAFNLLGPMLNPAADAA YGLVGVYSTSVSHLMADALQAS  
GMRLGVKKALVVHSSGLDELTPMGPADVVEVTQQGKHSYSLEPIELGIPRCEVADLAGGDAALNARILMD  
AFGGARGPVADALNLAGVALAAATLAADAKEGVAMAQDAQRSGRAGDTMRKWLEVSQAARATELAAAAA  
PAPAT\*

>Chlre3\_126030\_estExt\_gwp\_1H.C\_80012  
MQTLLGKRATRPFQSRCPAASTVRTSTCRSSSVRCQAKMQMREVIEKLVREDLTKQAEEALGTL  
DDFVTEQAAAFLVLLRAKGETPAEIAAGLAKAMLDKALPVKTSQPVVIVGTGGDGIGSVNISTGASILAA  
AAGAKVAKHGNRSVSSLCGSADVLEALGIAIDLGPAGVNHCLDQAGIAFMYAPRYHPGMKAVRPVRSALK  
VRTALNMLGPLLNPAEASGLVGVYDTSISELMAGSLLRMGVQKALVVHSMGLDELTPMGPADVVEVTAG  
GPLKRYSLDPKEVGIPRCEVEDLKGGAQLNAILRDVAFAGQKQAVADALCLNAGYALAAACRVAATPAEG  
VKMAQEVQRRGDATLQRWAEASQAAAAAEREQAHAHVA\*

>Chlvu1\_25836\_e\_gw1.2.365.1  
MQILEALLEQRDLTELQALVLDGHAHQTMMAAFLVLLRAKGETAEIEVAGLAKAMREKSVHVATSGD  
VLDIVGTGGDGIGSVNISTGATVIAAAAAGAKVAKHGNRSVSSLCGSADVLEALGIAVDIGPEGVSRCL  
VGLGFMFAPRYHPAMA AVVPVRRSLKVRTAFNLLGPMLNPAADAA YGLIGVYSPAISGLMAATLQRLGTR  
ALVVHSHGLDELTPMGDAEILEVTPSGTRSYRLDPLDLGKRCQVADLAGGDAQLNASILTDFGGARGA  
VADALNLAGVALAAAEIAASPAEGVAMAQEAQQSGKAGDLLQRWRKVSQGCREEAR\*

>MicpuC2\_40109  
MASSFAISRAGVAPRASAARTTRARASSPSIARPQSSSSSRSPRRRRSSFPPLGARGGVSATRAAAAA  
VDLNRNIERLCDREDLTEEETEASLDALDADPAQIAAFLVLLRAKGETPAEMAGMARAMKGRAVAVDAG  
DDVLDIVGTGGDDAGTVNISTGSCVLA AAAAGAKVAKARPTSLRRSLSFSNETSTSSNN\*

>MicpuN2\_107872\_est\_cluster\_kg.Chr\_03\_29\_3201590:1  
MGFMFAPRYHPAMKAVVPVRRKALKVRTAFNMLGPMLNPAAGTQYALVGVYTPDLQPLMADSLMALGMKKAL  
VVCSTVGDLSLDEMTCPGPTSVVEVTPAGTKSYFDPKDVGIPPCELKDLAGGDAKLNARMLTDALGGEK  
GPVADCLMLNAGVAMAAAAQAESVEEGVAMCKEAHAQGKAGDTLRSWIELSQELKLQEA\*

>Ost9901\_3\_32105\_eugene.0600010164  
MRARRWERARGCGNAGRAVVARATARRAAVDLRKVIEDLCEGADLSEEDAHAAMEALLDADPTQIAAF  
LVLLRAKGETASEMAGLARAMQSRAVTVDAGDDVLDIVGTGGDDAGTVNISTGSCVLA AAAAGAKVAKHGS  
RSVSSLCGSDVLEALGVDIELGPESMKRCVEEVGVGFMAFAPRYHPAMAKVSPVRKALKVRTAFNMLGPM  
LNPAHNSKYALVGVYSTGVQQLMADSLMMLGMKKALIVHSMGLDELTPAGPADVVEVTPSGTRAYTFEPK  
VDIKPCTLEDLRGGDPTTNRILRAALEGEKGPVAETLILNAGVAMAAAAQAKDVVEGIAMAREAHESGK  
AGKTLDSWIKLTQELRKTEA\*

>Osta4\_33342\_0600010189  
MRRTSGGVILAVSAPANAI DLKVIEDLCAGVDLSEERAYAAMEALLDADQAQIAAFLVLLRAKGETAAE  
MAGLAKAMQSRAVEVDAGDEVLDIVGTGGDDAGTVNISTGSCVLA AAAAGAKVAKHGSRSVSSLCGSDV  
EALGVEIDRHGLHVCPEIPPAMAKVSPVRKALKVRTAFNMLGPMLNPAHNSKYALVGVYSTGVQQLMADSL  
MRLGMKKALVVHSMGLDELTPAGPADVVEVTPNGTRSYTFEPKDVGVKACTLEDLRGGDPQMNAKLLRAA  
LEGEKGPIAETLILNAGVAMAAAAQAKDVTEGIAMAREAHESGKAGKTLNAWIALTQDVFIKPISRGNV  
SY\*

>Phypa1\_1\_219372\_estExt\_Genewise1.C\_1730077  
MAAALASQRTWLPSSSVGPFGRSFATAPASSPRVLGVPKRFVAVESGKWEVLVRNVRAQSSTVTPARTLS  
IPQVLELIQGTNLTAQTTEVMEILLADANPAIIGAFALLRAKGETLDEVTGLASAMLSRAIPVRTVP  
GSLDIVGTGGDGANTVNISTGSCILAAACGAKVAKHGSRSSSSACGSADVLETLGV AIDLGPPEGVAKC  
DVGVGFMFAPRYHPAMKVVAPVRRSLKIKTAFNMLGPMLNPSRAPHSIVGVYHDNLVEKMAKILQHF  
GTRTLVVHCHGLDEMSPLGGGRVLEVTQDKIESFVDFPLNFGIPRCTLEDLKGGAADFNAKSLRNVFAGE  
PGPIADSLILNAAAGIMACGLVKDLGEGVSLARDVLRSGRANTVLDNWSLSQKLAEEVSE\*

>Selmo1\_230552\_fgenes1\_pm.C\_scaffold\_5000108  
MAAAVGVASFDLFLKPLLRSSSRGSSRLRARTGMCFTRSVQCAASNSLSHSVPRLIETLLEKTDLTSEQTES  
VTDMLLEGADAAQISAFVLLRAKNETFEEIAGLAKAMIKRSIAVPGLVGGDIVGTGGDGANTVNISDWS  
LYPCFLRSQGCKGTMHGNRSSSSACGSADVLEALGVEINLGPPEGIARCCKEAGIAFMMAKPFHPAMKVV  
GPVRKSLKVKTVFNILGPLLNPARVPHQIVGVYSKSLVPKMAKALQLLGTKHALVVHSEGLDEMSP  
LPGPFILEVTPTSIKIEFDFPLDFGFPCTVEDLRGGDAAFNSKVL RDVGGQEGHIANALILNAGAGLVAC  
GVADDLKSGVEMAQAAQQSGQALKVLDSWIHLSQELKMQEEAVAVS\*

>Volca1\_118599\_fgenes5\_synt.40\_30  
MTCPQLTPTNIGRELQVIEKLIRREDLTKELAEETL GALLDDFVSEQAAAFLVLLRAKGETSDEIAGLAQ  
AMLAKALP

## PINs

>AtAAP1

MKSFNTEGHNHSTAESGDAYTVSDPTKNVDEDGREKRTGTWLTASAHITAVIGSGVLSLAWAIAQLGWI  
AGTSILLIFSITYFTSTMLADCYRAPDPVTGKRNYTYMDVVRSYLGGRRKVLQCGVAQYGNLIGVTVGYT  
ITASISLVAVGSKNCFHDKGHTADCTISNYPYMAVFGHIVQLSQIPNFHKLFSLSIMAAVMSFTYATIG  
IGLAIATVAGGKVGKTSMTGTAVGVDVTAQAQIWRSFQAVGDIAFAYAYATVLIQDTLRSPPAENKAM  
KRASLVGVSTTTFFYILCGCIGYAAFNGNAPGDFLTDGFFPEPFWLIDFANACIAVHLIGAYQVFAQPIF  
QFVEKKCNRNYPDNKFITSEYSVNVPLGKFNISLFRLLVWRVTA YVVITVVAMIFPFFNAILGLIGAASF  
WPLTVYFPVEMHIAQTKIKKYSARWIALKTMCYVCLIVSLLAAAGSIAGLISSVKTYKPFRTMHE

>spra\_contig01436\_c\_s

IESMYGTLARTLMSQLVAIQVIVWYTATVLIIFEIWAAKKESFEKIQSFRESFRQNLKENS  
DTREKQNASFTSKVANFNANVANFDDRTLSEENSKQSQTNEKTELNSPDIEITFYNDAS  
KTSNNINNDGADDYNDGNYNNKNNERTNKLKDAQSSPNVSTINSKHYERNLSLSA  
TDASKLEHNLEEPSEKEKVIDVISAENKFLPPENWGQIEKNLEKEFQVGTILFRKLVAN  
PSLHSSLYGVYSLIAFGDFKMPLLLKNLDIIANTGMGMAMFSLGLFIASPRNFESCG  
VWRVTWMMIRLLACPVITA AAFSYALALHGRVLYISILQGALPQAVLSFVLSNEYKIHPE  
IHTALIVVTTGLCFPLMLLMYMAFESL

>AtPIN1

MITAADFYHVMTAMVPLYVAMILAYGSVKWWKIFTPDQCSGINRFVALFAVPLLSFHFIAANNPYAMNLR  
FLAADSLQKVIVLSLFLWCKLSRNGSLDWITLFSLSLTPNTLVMGIPLLKGYGNFSGDLMVQIVVLQ  
CIIWYTLMLFLFEYRGA KLLISEQFPDTAGSIVSIHVSDIMSLDGRQPLETEAEIKEDGKLVTVRRSN  
ASRSDIYRRSQGLSATPRPSNLTA EIYSLQSSRNPTPRGSSFNHTDFYSMMASGGGRNSNFGPGEAVF  
GSKGPTPRPSNYEEDGGPAKPTAAGTAAGAGRFHYQSGGSGGGGGAHYAPNPGMFPNTGGGGGTAAKG  
NAPVVGKQRQDNGRDLHMFVWSSASPVSDVFGGGGNNHHDYSTATNDHQDKVKISVPQNSNDNQYV  
EREFSFGNKDDSKVLATDGGNNISNKTQAKVMPPTSMTRILIMVWRKLRNPNSYSSLFGITWSL  
ISFKWNIEMPALIAKSISILSDAGLGMAMFSLGLFMALNPRIACGNRAAFAAAMRFVVGPAVMLVAS Y  
AVGLRGVLLHVAIQAALPQGIVPFVFAKEYNVHPDILSTAVIFGMLIALPITLLYYILLGL-

>AtPIN2

MITGKDMYDVLAAAMVPLYVAMILAYGSVRWWGIFTPDQCSGINRFVAVFAVPLLSFHFISNDPYAMNYH  
FLAADSLQKVIVLAAALFLWQAFSRRGSLEWMITLFSLSLTPNTLVMGIPLLRAMYGDFSGNLMVQIVVLQ  
SIIWYTLMLFLFEFRGAKLLISEQFPETAGSITSFRVSDVISLNGREPLQTD AEIGDDGKLVVVRSS  
AASSMISSFNKSHGDDSKVLATDGGNNISNKTQAKVMPPTSMTRILIMVWRKLRNPNSYSSLFGITWSL  
YTNSYGGAGAGPGGDVYSLQSSKGVTPRTSNFDEEVMTAKKAGRGGGRMSGELYNNSVSPYPPNPMF  
TGSTSGASGVKKKESGGGGGGVGGQNKEMNMFVWSSASPVSEANAKNAMTRGSSTDVSTDPK VSI  
PPHNDLATKAMQNLIENMSPGRKGHVEMDQDGNNGGKSPYMGKKGSDVEDGGPGPRKQMPASVMTRLI  
LIMVWRKLRNPNTYSSLFGLAWSLSVFKWNKIMPTMSGSISSILSDAGLGMAMFSLGLFMALQPKIIAC  
GKSVAGFAMAVRFLTGPAVIAATSIAIGIRGDLHIAIVQAALPQGIVPFVFAKEYNVHPDILSTAVIFG  
MLVALPVTVLYYVLLGL-

>AtPIN3

MISWHDLYTVLTA VIPLYVAMILAYGSVRWWKIFSPDQCSGINRFVAIFA VPLLSFHFISTNNPYAMNLR  
FIAADTLQKIIMLSLLVLWANFTRSGSLEWITIFSLSTLTPNTLVMGIPLLIAMYGEYSGLMVQIVVLQ  
CIIWYTLMLFLFEFRGAKMLIMEQFPETAASIVSFKVESDVVSLDGHDFLETD AEIGDDGKLVTVRKS N  
ASRRSFCGPNMTPRPSNLTA EIYSLSTTPRGSNFNHSDFYSVMGFPGGRLSNFGPADMYSVQSSRGPT  
RPSNFEENCAMASSPRFGYYPGGGAGSYPA NPEFSSTTTSTANKSVNKNPKD VNTNQTTLP TGKKSNS  
HDAKELHMFVWSSNGSPVSDRAGLNVFVGAPDNDQGRSDQGAKEIRMLVPDQSHNETKA VAHPASGDF  
GGEQQFSFAGKEEEAERPKDAENGLNKLAPNSTAALQSKTGLGGAEASQRKNMPPASVMTRLILIMVWRK  
LIRNPNTYSSLIGLIWALVAFRWHVAMPKIIQQSISILSDAGLGMAMFSLGLFMALQPKIIACGNSVATF  
AMAVRFLTGPAVMAVAIAIGLRGDLRVAIVQAALPQGIVPFVFAKEYNVHPAILSTGVIFGMLIALPI  
TLVYYILLGL-

>AtPIN4

MITWHDLYTVLTA VVPLYVAMILAYGSVQWWKIFSPDQCSGINRFVAIFA VPLLSFHFISTNDPYAMNFR  
FVAADTLQKIIMLVLLALWANLTKNGSLEWMITIFSLSTLTPNTLVMGIPLLIAMYGTYAGSLMVQVVVLQ  
CIIWYTLMLFLFEYRGA KLLIMEQFPETGASIVSFKVESDVVSLDGHDFLETD AEIGNDGKLVTVRKS N  
ASRRSLMMTPRPSNLTA EIYSLSTTPRGSNFNHSDFYSVMGFPGGRLSNFGPADLYSVQSSRGPTPRPS  
NFEENNAVKYGFYNNNTSSVPAAGSYPA NPEFSTGTG VSTKPNKIPKENQQQLQEKDSKASHDAKELHM  
FVWSSASPVSDVFGGGAGDNVATEQSEQGAKEIRMVVSDQPRKSNARGGGDDIGGLDSGEGEREIEKAT  
AGLNKMGSNSTAELEAAGDGGGNGTHMPPTSVMTRILIMVWRKLRNPNTYSSLIGLIWALVAYRWH  
VAMPKILQQSISILSDAGLGMAMFSLGLFMALQPKIIACGNSVATFAMAVRFLTGPAIMAVAGIAGLHG  
DLLRIAVQAALPQGIVPFVFAKEYNVHPTILSTGVIFGMLIALPITLVYYILLGL-

>AtPIN5

MINCGDVYKVIAMVPLYVALILGYGSVKWWHIFTRDQCDAINRLVCYFTLPLFTIEFTAHVDPFNMYR  
FIAADVLSKVHIVTVLALWAKYSNKGSYCWSITSFSLCTLTNSLVVGVPLAKAMYGQQA VDLVVQSSV FQ  
AIVWLTLLLFVLEFRKAGFSSNNISDVQVDNINIESGKRETVVVGEEKSFLEVM SLVWLKLATNPNCYSI  
LGIAWAFISNRWHELPGILEGSILIMSKAGTGTAMFNMGIFMALQEKLIVCGTSLTVMGMVLKFIAGPA  
AMAIGSIVLGLHGDVLRVAIIQAALPQSITSFIFAKEYGLHADVLSTAVIFGMLVSLPVLVAYYAALEFI  
H-

>AtPIN6

MITGNEFYTVMCAMPYFAMFVAYGSVKWCKIFTPAQCSGINRFVSVFAVPLLSFHFISQNNPYKMDTM  
FILADTLKIFVFLSLWAVFFKAGGLDWLITLFSIATLTPNTLVMGIPLLQAMYGDYTQTLMVQLVVLQ  
CIIWYTLMLFLFELRAARLLIRA EFPGQAAGSIAKIQVDDDVISLDGMDPLRTETETDVNGRIRLRIRS

VSSVPDSVMSSSLCLTPRASNLNAEIFSVNTPNNRFFHGGGGSGTLQFYNGSNEIMFCNGDLGGFGFTR  
PGLGASPRRLSGYASSDAYSLQPTPRASNFNLDVNGNGTPVWVKSPAAGRIYRQSSPKMMWESGQRHAA  
KDINGSVPEKEISFRDALKAAPQATAAGGGASMEEGAAGKDDTPVAAGKQEMPSAIVMMRLITVVGGRK  
LSRNPNTYSSLLGLVWVSLISFKWNIPMPNIVDFSIKISDAGLGMAMFSLGLFMALQPKMIPCGAKKATM  
GMLIRFISGPLFMAGASLLVGLRGSRLHAAIVQAALPQGIVPFVFAREYNLHPDLLSTLVIFGMIVSLPV  
TILYYVLLGL-

>AtPIN7  
MITWHDL YTVLTAVIPLYVAMILAYGSRVWWKIFSPDQCSCGINRFVAIFA VPLLSFHFSSNNPYAMNLR  
FIAADTLQKLIMLTLIIWANFTRSGSLEWSITIFSLSTLPNTLVMGIPLLIAMYGEYSGLSMVQIVVLQ  
CIIWYTLTLLFLFEYRGAKILIMEQFPETGASIVSFKVESDVVSLDGHDFLETDAQIGDDGKLVHTVRKSN  
ASRRSFYGGGGTNTMPRPSNLGAEIYSLNTPRGSNFNHSDFYSMMGFPGGRLSNFGPADMYSVQSSRG  
PTPRPSNFEESCAMASSPRFGYYPGGAPGSYPAPNPEFTGNKTGSKAPKENHHHVGKSNNDAKELHMF  
VWGSNGSPVSDRAGLQVDNGANEVVGKSDQGGAKEIRMLISDHTQNGENKAGPMNGDYGGEEESERVKEV  
PNGLHLRCNSTAELNPKEAIEETGETVPVKHMPPASVMTRLILIMVWRKLRNPNTYSSLIGLIHALVAF  
RWDVAMPKIIQQSISILSDAGLGMAMFSLGLFMALQPKLIACGNSTATFAMAVRFFTGPVMAVAAMAIG  
LRGDLLRVAIVQAALPQGIVPFVFAKEYNVHPAILSTGVIFGMLIALPITLVYYILLGL-

>AtPIN8  
MISWLDIYHVVSATVPLYVSMTLGFLSARHLKLSPEQCAGINKFVAKFSIPLLSFQIISENNPFKMSPK  
LILSDILQKFLV VVVLAMVLRWFHPTGGRGGKLGWVITGLSISVLPNTLILGMPILSAIYGDEAASILEQ  
IVVLQSLIWIY TILLFLFELNAARALPSSGASLEHTGNDQEEANIEDEPKEEDEEEV AIVRTRSVGTMKI  
LLKAWRKLINPNTYATLIGIHWATLHFRLGWNLP EMIDKSIHLLSDGGGLGMAMFSLGLFMASQSSIIAC  
GTKMAITMLLK FVLGPALMIASAYCIRL KSTLFKVAILOQAALPQGVVPFVFAKEYNLHPEIISTGVIFG  
MLIALPTTLAYYFLDL-

>Oenococcus-oeni\_mleP  
mnaftsvses vveivlvial gyvlrrsgkl adsfkgnisy limnialpls ifvsvlylt  
rdklvslsgg lvfaaasfav syvlaylitk ifkirvgrg tfinmfvnan tfiglplns  
alfgtskmpy fliyyvmnti stwaigiffi ssddpdrckt ekqsfnwkk lpmplvgfli  
sivvllaip ipgvwtfts mvggivtpms liyigiilad aglksihfdr dsilaligrf  
iivpavmiii kklfggsmpk lesstliqa aapglavipi lvgqnhgdve yatnvtstt  
vfvivvpil mqfv

>Klebsiella-pneumoniae\_mdcF  
mtyviihala pifvimllgf waggagmvdn knvslnifv mdfalpatlf satvqtpwag  
ivaqspvlv ltagmwitya aiyflatsvf krtppdaavl tlvalpnya algplilgsv  
lgegastsls vavsiacgsv lmpfcllil erekaraage nsgstlampl vlmwrsvkkp  
iivwgplgvv lsaigikmpd llasikplg laataaalf tgvlisarkl qlnaliatst  
ivkllvqphi awglvmlgl hgsiaitail mialaagffg vvfgrnrgvq spdaevlll  
ssvcilslp lfisltsgl

## **ST5A**

>ST5A\_AT1G74100  
MESKTTQNGSEVVELTEFEKTQKKYQDFIATLPKSKGWRPDEILTQYGGHWWQECLLEGLFHAKDHF  
PTDFLVCSYPKTGTTWLKALTYAIVNRSRYDDAANPLLKRNPHFVVPYVEIDFAFYPTVDVLQDRKNPLF  
STHIPNGLLPDSIVNSGCKMYYIWRDPKDTFISMWTFHLHKEKSQEQQLASLEDSFDMFCGLSVYGPYLD  
HVLGYWKAYQENPDRILFLRYETMRANPLPFVKRLAEFMGYGFTDEEEENGVAEKVVKLCSFETLKNLEA  
NKGDKERDRPAVYANSAYFRKKGKVGWDWANYLTPEMAARIDGLVEEKFKDTGLLQHDN-

>VPS11\_AT2G05170  
MYQLRKFDFEKEYGGKIPEDVTGDIQCCSSGRGKVVIGSNDGSVSFLDRGVKFDGSGFQA  
HSSSVLFLQHLKQRNFLT VTVGEDEQISPPQSGMCLKVFDLTKVQEEGTSSSAPECIGILR  
IFTNQFPEAKITSFLVLEEVPILLIAIGLDNGCIYCVKGDARERITRFKLQVDGRSAI  
TGLGFRMDGQALLLFAVTPESVNLFSMQAQPPLQTLDHIGGSVNTVTMSDRSELIVGRP  
EAVYFYEVDGRGPCWAFEGEKKFMGWFRGYLLCVIDDSKTGNTVFNVYDLNRNLIAYSIV  
VDKVSNMLCEWGNILIKADKSLLCITEKDMESKLDMLFKKNLYTVAINLVQSQHADAAA  
TANVMRKYGDHL YGKQDFDEAMLQYINTIGYLEPSFVIQKFLDAQRIYNLTNYLEKLHEK  
GLASKDHTLLLNCTYTKLKDVEKLNFTFIRKEDGIGELKFDVETAIRVCRAANYHEHAMVY  
AKKAGKHEWYLKILLEDLGNIDEALQYVSSLEPSQAGVTIEQYKILIEHKPKETIDILM  
RLCTEQGIPNGVFLSMLPSPVDFITVVFQHPHSLMHFLERYAEIVQDSPAQAEINNTLLE  
LYLSRDLNFPISLSENGLDKDLIDHSVAAA VSKADPEKKTNADSKDAMEKDCTERQQKG  
LELLKMAWPSDLEQPLYD VDLAVILCEMNSFKDGLLYLEKMKFYKEVIACYMQNHDHEG  
LIACCKRLGDSSKGGDPSLWADLLKYFGEIGEDCTKEVKEVLT YIERDDILPPIIVLQTL  
AKNPCLTSLVVKDYIARKLEQESKIIIEDRRAVEKYQETTKNMRKEIEDLRTNARIFQLS  
KCTACTFTLDIPAVHFMCMSHFHQRLCLGDNEKECECAPEYRSV MEMKRSLEQNSKDQDL  
FFQVKGSKDGFSVIAEYFGKGIISKTRDATS-

>AT2G03750  
MFTFTILSLCFKSWEQITMEASKEAHHLPNYMKDDNVSQETKNLITSLPSDKDFMGY  
LYNYKGCWYYPNTLQAVLDVQKHFKPRDTHILASLPKGGTTWLKSLIFAVVHREKYRGT  
PQTHPLLLQNPHDLVPFLEVELYANSQIPDLAKYSSPMIFSTHMLQALREATTACKTV  
YVCRGKIDTFVSGWHYRNMLHRTKMDQATFELMFDAYCRGVLLYGPYWEHVLSYWKGSLE

AKENVLFMKYEEIIEPRVQVKRLAEFLECPFTKEEEESGVSVEILKCLSLRNLNSNLEVN  
KNGTTRIGVDSQVFFRKGEVGDWKNHLTPQMAKTDFEIIDYRLGDSGLIFQ-

>ChINC64A\_1\_59577\_estExt\_fgenesh3\_kg.C\_30013

MPADLSASDREDVVRTVQKMEEANRNLETAEGRMAGANLRVTQDDIMIVSPPKCGTTWLCQIVHMLRSGG  
DMSYDEINLVIPCIEMAWDYGLKDMTVQDQWVRPVYKTHFWRPHCPKGAGKYLFITRDLPLDAGPSFFYFL  
QGWIFDAGAIMHDFLVHFVLRGGDPPSPLFNAGMWNMMASWYPHRADPNLLWLHYEDLQEDLPAAVSLI  
AEFLGIGQHDPALQALAVRSTIGWMKRFPEKYDEHMLKLARNEACGRPREAGLRTGKVRREGRVGRNKEE  
LTPELRQAIQERWDDTMLPVTGYATYEEMRRGINRELGRPFSS\*

>Chlre3\_157945\_acegs\_kg.scaffold\_22000005

MAAATAKLLAAALLGASLLCTAVQAQEVNPSSYLASQVNEPKYTIQEVWGAHKHLNNFREIDMAAKDTFV  
ALPREYSSSTRNCPWEQEGAFKCLPYFQILGVSKCGTTDLNRLTEHPDMVDCTWKGPHFWDEAAYPVRV  
KRAPGRYDGSFPAIYIGIFDKPAQKIKANPNAITGEASSNTFTAVVWSHLRGRTLTKRINATLAEYLWEATP  
YARYIVMFRDPVTRYRSAFFYRTRKSLPKATDKFELDRVKEDIAEWENCLSSNSKLYCLKMYTPQQLVKG  
MYADFLPAWLAVWPRDRFLFRFRTEDYKAAPVPHITATMKFLGLRDLQESEMKSILELQAKNTQSSKYDSS  
TLPSELKEAYKTLQDFYRPNQALSKAFGDDPRWLWGY\*

>MicpuC2\_53089

MAEEAPPPPPPPSREMTPELMLRHRNDLMHSAESIHAGRSFAPRPTDVVFIVYPKCGTTWATQARSIH  
RAPYDRVGVVCHQIRCIASNASCAAKHAAAMGGPASGATARAHVVDAMAFGEITQVVPWDILALDCGQRL  
DDEQVCDPRLFKSHERWENVAKGARYVVCVVRDPLDVFFSYFNFLPAYMGIAPGKITHEEFADAIFAGASH  
SGHVVAHFLGYWEQARREDVLLVCFEDMKENLARVVERVARFILGDGNGNGDGNAAASASAFEWTSAMTDE  
VCEKSEFEYMRSRAAQFDDHFVREEMWRRVRIDENEWGGDKLVGKVRGGGKVGKGGGKMGMSAELRERIEK  
RWDEVMRPAQFEAYADFRRAINALYR\*

>MicpuC2\_53691

MEAHGPWLPITSPRTLACKDFETRPTDVVFCVSYPKSGTTWTQNVLAQIITALETATFAHVSDVSPFFE  
ASSSSLIPSAIKHETYGRRCFNTHLPWELAPRGAKYVYVYRDGRDAAVSFYHHLRNQSVDDGGFEGGW  
RFFERWIDGQIAFGSWFEHVLGWGAAAGEGADVLAVGYEELVRDLRGVVEKIADHVLLNASPADRGPRLT  
EAQLDAIAAKCGFDAMKADVDRFQPRSVRWRDPEYCFIRKGVVGDHRTTMTAAQSAAFEAKAAEAFGPKG  
VDDAPLFSRAAPRVDSPHS\*

>MicpuN2\_104367\_fgenesh2\_pg.C\_Chr\_15000139

MGGVDEAAMTPELMLRHRNGLMHSESSVANRGRFVPRPTDVVFTYPKCGTTWTQIQICHQIRCVRAGRDD  
PSMDAMAFGEITQVVPWDILTLDCDQDLADHVCDPRVFKSHERWEDVAKGAKYLCVVRNPVDVYFSYFN  
FLPAYMGIPEGAIPEEFADAIFAGASHGHCWQHFLGYLDARDGDEGKGEKGEKIMMIFEDLKEDLP  
RCVRAIASFMGFHDMTPREIDRVVHASSFEFMRANATSFDDHFVRRKMWARCIPESDWRGGGKVRHG  
GGCVGGGVIGMSEALRRRIDGKWNEMVRPRGFATYDDFRAAVNKVNTR\*

>MicpuN2\_107876\_est\_cluster\_kg.Chr\_03\_\_33\_\_3199036:1

MAGWTKTKTYDSHHFDSGAWDVVKPRDDDIVIATAYKAGTTWMQQIVAQLFNGEPPAAV GELSPWVDLR  
VPPREVKEGMVEAIPGRRFLKTHLPTDALDYNPSQKYIYVARDGRDAFMSLMNHKFGNEMWY GALNESP  
GLVGAKLPAWEEACEGKEGDEAIRAVFDKWLNTWPGEHPWEKDGWPFWSLFYNNMKTWWDAKDLPNVLMVH  
FTDLKDLAQMRRIADFIGVPVDEAKFDAQVHACTFEAMKGNAAVAPLGGAMWKGADTFINKGTNGR  
WVGVLTDQVAA YEKAAQERLGGECAKWL AAGGDI\*

>MicpuN2\_63276\_EuGene.1200010448

MSKKAAKKAAKAKADAKAKARLEKGLDPNPPNPRQLVPMMESKRAALAGTKRAAPEPDADAPAPDG  
DAGTLLPKSAIHKRTTKDNEIVAEIEEEEYDWMVPDPDYARNPVDVVVVVVVVVVVVVVVVVVVVVVVVVV  
WMRRKQRAMEKKARAEALIREQDPDPQPKAPPVRIEDHGPWLPMTSHRTLHACWKMQTFASDVFCISYPK  
SGTTWMQNIVAQIITQCEKKNKNGATGATMKFKHISDVAPFLEIDPHWNHDLDDFGRPMHTDELLENFEK  
FERTYNTLHPFELVPGKGVGEIFLPWETWAHKPGVSVRPRYVYVVRDGRDCAVSFYHLLSSQAPEDGG  
YAKGWNAAFDEWIEGKIAFGGWAHHLKSWQVPGDFPAVLVVRVEDMKNLREVVKRVATHVLGGPCQVS  
EQLDYRIAARCSFDRMKKEIDRFQPKSVRWSNPDYCFRLRKGVEVDWEVTFTEAEQERFQKKIEEVFGFDR  
FGKPLGPPLDRMSAMYSDIGVWEEAWTGIPERPIARY\*

>Ost9901\_3\_32551\_eugene.0700010148

MRERNARMHSAASVARGTTGFAPRASDVFIATYPKTGTTWMMQIQHQRCEAARARGEDANGEAFDEITE  
VVPWDVVALDCGQDLDAQTTTTPRFKSHERATTMARGARSVVVTREPADVHFSFYELPAYMGIERGAI  
TREEFAEAI FAGASHGGFAEHYLSWYDAATASRDDVLMVAFEDMKEDLGAVVDDVA AFLRCELDERGRD  
VVLERASFAYMRKNHTKFDHFVRLARLAEQIGLPKASTFSVGKVRGGGAVGAGARELPQTVRDAIQAHW  
DARMAPRGFKTYDAFRAALRDLRR\*

>Ostta4\_17079\_e\_gw1.05.00.328.1

MPRGWTKTRAYDSHHFDADAVSVVTPRAGDVIIATAYKSGTTWMQQIVSQLVFEGAAPAALGELSPWVDL  
RVPPREVKRGMI EGLPSRILKTHLPTTGLEYDENAKYIYVARDGRDAFMSLMNHKNGNEAFY GALNGP  
GLKGAPLPTWEEACEGEGDEKLRALFDKWLNTWPWQHPWEEDGWPFWSLFYNNMKTWWDAESKNIIIFVH  
SDLKDLKGMRRIAKFLNAPIDESKFDQAQVACTFESMKGNAASVAPLGGALWKGGAETTFINKGTNGRW  
RNVLTKEQVKQYEQVAEKRLGKDKAKWL ANGGDMNGRGCVIM\*

>Volca1|107151|estExt\_fgenesh4\_pg.C\_590017

MLIRLALRLALGFETAYVQIGVCITNHGLSRSHGSPGKSPHQEPWRSRQPRLRAPRRADADSDRD  
DDGDGGDGCSSDVLEEDLQDYLENVLGATDIGSSKQSGAGSKSHSSAGCRRPAAVAAATS AHGPGSSDG  
DDSDGDDNDGEEVEEEDGKVV MRAVEGLDNGEDEQREEEDEVEEGGEEEEEEEEKMRRLPVRAASPWL



PLSLTLAAASSSTTFSSAYVTKEARQTAFLAKEQVEEANAPVSGNLPVSWLRGTVVINGCGDYRGMHEHL  
KDFGAFLTRIHLDGVTGRATASQRFLDTDAYRSFRKTRGMKYREFQTPVPADGPVGRVQVVENIKALMS  
KGRAFTDNASINLIPLPGNRLLAGETRSAAYIVDPATLATVRQVEYDDDFPGLDTHAHPKVAAPDGSIMN  
FTRSLPLGGYHVFRQDPVTLRRTKIAFIRDNRNPWAPCWVHDMAITSSSLVTVETPLFISMASLILGTRKP  
YAFMDWKPEAGCRVHVIALDGGVVTHTAPAFFTHLGNAFERPSGTSSGTEICLDFSVYDDPEIINDLS  
LDRLKAFPGKDISPGRRLRRLVIPLRDAANRPVGPSSLAAPVPLLDENAYGNFFFEFPAINPRFRGKPYRY  
MYGTAAIRPTNMGNALARHDRKKGAVFAASCNDLRLSSEAENTSVFTATESPCQLLGHATAQLSLHVANT  
ARINTTAAAAAGRAVAAGAKGGTIGGGGGSGFTVADRHALFTAAGSAAATLVVGNVNASGQDASKQSGAG  
GDGVNVNPSYLAPQVKVPNYHVNDIWKATHLHPNYPEIEAAARDTFVALPSSYDTKYRNPWCWTQDGTFK  
CLPYFQILGVSKCGTTDLYNRLTEHPDMIDCSWKSSKYDSSKASRELNTAYQLLDFYKGRTRLVKRINS  
TLSEYLWEATPWARYIVMFRDPVTRYRSAFFYYRNKALGKPTDREFLERVQQDIADWEKCLADNSELYCL  
KAYHPQQLVKGMYGKYLGGWLSVWPRDRFLFMRTEDYKSAPVEHLTAAIKFLAADTVIPLFLPPYSGP  
RVHLMRHRFPFNQELSRAFGNDRPLPIAQHVHIQPWLS\*

>Volca1|107145|estExt\_fgenes4\_pg.C\_590006

MNSKLRTAIVTLVFLSLHLQNVFSDGVNVNPSYLAPQVKVPNYHVNDIWKATHLHPNYPEIEAAARDT  
FVALPSSYDTKYRNPWCWTQDVTFKCLPYFQILGVSKCGTTDLYNRLTEHPDMIDCSWKGFHWDESAYPV  
RVKRPGRYDGSFPAVYVFDKAAARIQANQAAITGEASSNTYTAVYSHLRGRTLVKRINSTLSEYLSLSS  
GGRGYDAGCGGGDC\*

>Volca1|92489|fgenes4\_pg.C\_scaffold\_26000093

MANMRNSPPRDKAPVKKAWTGQVAAQLACSSPHTKMLRPIFYHVADVWASFKPSSNHEEIVKAAPDTWE  
VLPKAFDKNYRNPWCWTASGRFRFCAPYFQIIGVSKCGTTDLVGRNLNRHPDMAEGAKGPHFWDECPYPPKG  
ACTAPPNGDFDGYINLFEKGAAVIRTNSLAIVGEASSNTYTGVTFTVFRGLARLKTNTLAQLIYEAQPYQ  
RQIIMRDPVSRYSYAFHYRRTDPEFEGDKFHERVERDINLWTTCEQRFVKECVKRYEPQQLVKGMY  
YSEFVDAWTSVFPSEQLMFLRTEDYKAAPREHIQAVIKFLGMRDLSDEETTTMMRLRRFNAQSEKYPRMW  
PKSRKMLEDFYRPFNQKLAKLMGDDPRFLWEDTAKKAAAAAAGTTASQ\*

>Volca1|118754|fgenes5\_synt.43\_12

MSGWVGGWVGGWVGGWVGGWVGGPSTTELTDTRRSDTQAAASDVASDTQLAHLPSPTGGWAGTGIRQAPS  
TDSLARHLSQIIDLQPKATGSSFREEARLEATPLGETVAPASLAPSSKTPSHSSVDNIEGVSVGEDSP  
SAPSKKDSEAQRLLPVATVNLPGSADAGPGSGGPRGTPDLLRLERVELPPPPPPPSLQLHQQQQSPE  
PRGASRHHSGCELLVAVPESDYMYEEELDRLARSPQLSERAKDPGFTLLHFVAMLGHGMLADALPDD  
MMSRYHHFARLASCLISRQRVEVFATDKYGCTPLQAAAAIGNTEMVRVLEPYDFETSSEVLPQNYHGY  
DYLNHQDSQVCFALHGA VNHNAHDAVILLKKGANPQALDVTRKTAFEVAPSLVSLQELLRLAVQRQDE  
VPRSIVVQLMAVVLQKQTEGGTQDQKGAATAVAATSGGGGGPDGPNLQDSKGSRSFRAQQRWSKAARY  
ATSAQAQVIPAQRFTSAIETIGNMHNSDVASTIRRHFGKLYEAARYDVLVEYVILAINSNYSLTEMM  
IERICNDPCDVLANSKWHETLEPLVCTYPTLHGLLFLKQDMRDEEDVRGFVRCLTPSTLQGGYRGRPQS  
VNPLMAMSQRGMKKAHA VDRVKLLIYQQLVEGLKKVSYRIIKTFFEESDQRLNDMAQFPFAEFVGLVA  
NMDTGKAIAGESDDMRQALLDLLRPPKPTPATAVVPVAPFANA AVAAQAIAGGDASTPVTRPSTAIASAAA  
ALRPSDAPPVTMAWGSVDSRKVLLAAKESAAAPKVSFKLDAPPRDEGLGIGSDCGVGAAGAGVGGSA  
GDSGQLSSLMTSGGSRLLSTGGTSGQLSSVSAASGRGSGRSAGGGGGGGDDDLRRLRQARFGSGA  
ARGFGSGGESYGYGDEGEAEDDDVKRRRARLSLQTLNARPVLWAAVKAGKAYNVETVMISVSWVETNSK  
DGKAVFVAGITADLIQELAMRFPACATLLNLVSKDVLEQLDTLQVSANVLYGKDHLVKCSHVRNHFTWR  
EQELRKLITLNLQGYNEHVVDALVDYGVFPECVYKAAVEMGATPQDCATPEHFAALIEHGFTGPELKLIS  
NIRLAKVIGYIEECAKPPPDGVSSEFVNQLNVAMPVLLRDMKLERLSPRIVDIILREEKMFETTKYNNF  
RPGRPLRKVFPERLFVPKYTHHFVQMLLIMWQRGNKDGQGRVTLRPWAKEFIDTVFELNDPLSTKLKSA  
DNKLTDTQARLTVYIQGGDNPAEAGALESKSSGWL RDQQQSQVQVADEEKAKQAYIRQLLRIFIGNLLI  
HRWPVYLAHLWVFLDGAFNTYWRLEALYRKKARRLGLQMSLAKKARSGTIDA AVLAFFPILGLLQSDG  
GDILTALVHADAPSWFHYAIVRAMYGLHWSNFRVMVYLNAAVQLQLASVLTFFLLVNLVNYRPLANGTE  
EDLGRMNSIPIIQGVLCVAVVLSTSMILIERLLEARVPQLGTWVSFGRRLLELCCCHGMVWTVALIVWRGRST  
DLVPAISGLTMLLFAVRLTLFGLITEKLSTAVLALLEILSDSYFFLLIALVYGGFVLA VAGLRQQTHER  
PAIYTSQLFTVLLGDFQSSQLADDEERSVWRPFESLVLFSYAMLMLIVFMNLLIATMNDTYDRVKEFR  
EVEVMRLRSHMMVVFVDFIRRKGRKELAPLNGDVLHLLLRPEEVKSGRWLAQSGSEPSYSAWAGRITYM  
RSTIVREVEAVMRSHA EKATEQLGAIQQRLEKLEGNAAAAAATAAPAAAGEQFAALEHRLGEMHR  
GLEALLSRHSAGGKVREEGACLTVVPYWTAQPWWQQLMELAVDLVFLPSNTELFAPGEGDTSVPEPALV  
NLTVISVAASRHSIAIATADGVVWTMGHNSKGGGGHGSPLDASGQLGRAGTKEGPGVEGPLRGKFVVQV  
VTGRYHTMAVTEDELYSWGLNDWGLGRPAV GATSESDPTPCTAGPSCHS GIPGLVSLPGVVRVVGAAA  
GRYVSMVAVDDSGRLYTWGHDGCSNGGKLPERNEAYKPKLVSGELAAKRVAFDAGYVFVIAATAEAGEVYT  
CNSQDDGYAGTLSSRRAPNAGELGRGGDPLVPRVEGGLVGGKVEVAAGREHAVVSTADGKVFTWGSR  
DLLMGRKGNRSREPGQALGALGADNIRFVSAGEYHSGAASETLYGWGNGYFCTGVGRGNPVQGVIALGG  
WQVQAMVGGFQHLGAIANKGGRWEVMGHGRQMARRAVSRNLGGGRSAFQLHSMTAGALSSLASATQVAS  
SVAVTGIGTAVATAASRPAGGGGGDGDAAVAPARVVAALLQAVDTSAPDYHTRYLAPQLHPIELNASEHW  
RRYVRSRPFELIQVVGACWRMAGERLRCIPFYHILGVSKCGTTDLYHRLSKHALLFKSRNKARCGMGP  
WWDECIHPPVGPCTAPPNGDFDGYVELFADAAEKIRNIPDGITGEASSNTFTSAAGVYLRGSPWDRNTTV  
TMPELMREASPFLRNIIIFRNPNVDYYSYAFYYRRLWRDRTQAPPGPDEFHDAEKEIAAWRSCDQKDLKY  
CVRHYHPQQLVKGMYSEFIMDWLAHWPRDQLFLRNEDYSAATRVHLEAVFQFLDVRPRTEDEWFKIVGM  
ETRNKNSDKYQKMLPETRMLLEFYRPFNERLSEILGDDRWLWRDSPGTTTSSAAAST\*

>Volca1|107156|estExt\_fgenes4\_pg.C\_590028

MTVEASKMNSKLRRTTIVTLVFLSLHLQNVFSDGVNVNPSYLAPQVKVPNYHVNDIWKATHLHPNYPEI  
EAAARDTFVALPSSYDTKYRNPCCSSCRSRPPADSHSTPLSLSATGHKMARQGPWFDESAYPVRVKRPG  
RYDGSFPA YMSVFDKAAARIQANQAAITGEASSNTYTAVYSHLRGRTLVKRINSTLSEYLWEATPWARYI  
VMVVVVTMLVVVVALQSGAFEGVWERPAVVMGVLNTPHRTHVMTGGQTSMRRGGTREGERKGIPLAQHV  
HIQPWLS\*

>Volca1|107148|estExt\_fgenesh4\_pg.C\_590013  
MNSKLRTAIVTLCVFLSLHLQNVFSDGVNVNPNSSYLAPQVKVPNYHVNDIWKAAHTHLPNYPEIEAAARDT  
FVALPSSYDTKYRNPWCWTQDGTGFKCLPYFQILGVSKCGTTDLYNRLTEHPDMIDCSWKRSHIGEANQLHA  
VRIPIKFLAADTVIPLFLPPPYSGPRVHLMRHRPFNQELSRAFGNDPRWLWGY\*

>Volca1|101239|fgenesh4\_pg.C\_scaffold\_537000001  
MNSKLRTAIVTLCVFLSLHLQNVFSDGVNVNPNSSYLAPQVKVPNYHVNDIWKAAHTHLPNYPEIEAAARDT  
FVALPSSYDTKYRNPWCWTQDGTGFKCLPYSK\*

>Volca1|107147|estExt\_fgenesh4\_pg.C\_590008  
MCMRLVGTMGYPACGLPACKLQLRQDSQNQDLFFPEPMDTVSAAAAASAGVSSMFFLDPEGRQIAELKKW  
LDLAEDEYCMGRPIRPLFINGLVKTGKSYMLKEVLPVAVANTYSSGGSGRQHAGTVLSEPNFLHVNCLVC  
RRGSGISGFLKEILVVLKRSAAKQQLSAAASTPAPSDNSAVTAAGAIQDFMERLPRDRNLNLLIDEAQSF  
YLLTRAMPDGFSPRGTTLDVEEVQLMRCIFKELLLDSPHWVAVAVTGSSMATLWANVAVTPTNGVALITY  
HSQNLSPMVSQKDVLEVAWEQLKAQAASWDPPLPSDLLWQSPQIAMLALYLCQEWGRGLGTAITAAELVK  
QTLRGLIPEVRDHRCSRSGSKTNFERDNRAQTDVKVGLRWFRHLLRNILCHAPILDHDKFLDAYPEPMA  
AFHSSGRISKVLTATYESPKPRRSAAAAAPSVEAAAAPSTAAAAVPSMAAAAAAPGVAAAAMVVAVGRVV  
MNSTTPTATGHKDTARHYQRSVRGAEVAGGLTDGERPRKRARGPPTAGVVESGGSGGGGGATDAYHPQO  
LVKGMYDKYLGWLSVWPRDRFLMRTEYKSAPEHLTAAIKFLAGPVFTSCDTGGFCQSPNTSTSSLG  
SAHKH\*

>Volca1|85926|fgenesh4\_pg.C\_scaffold\_1000174  
MRPVRLGAKISAEKQDQGHGTSADTSSSGTQSTAKHTVVDDVRLRKAQVLDPEVMEQVPTDFLSEVKN  
PCWNTSNGDFRCLPYFYVTGMFHAGAMSISTKLMQHPDVVVDACSGCQFWGEEGKTMAFYLDNMKEAPKA  
IRQNPDTKVLMDSSASTFAFYWAAAGKAHRGYADAMKPCYRACVELFNTEKVPVGTGCMSSQRCYNTSVAAD  
SKRATDAGIDWETEAHNPLLVRVYVYGDKMPKMILVARDPIARLYSAFHGYPHYHGKYGKSSSGFTAAYVEE  
QVAAFRACAQDFGEAPCALYFEALSHREEQVYFHADQLMRGMYGLFLEIWRIFPPSNWMMVHSDDLFQR  
PKETMAKLVDFLGLTKVDDATLTRMASAGTPQSFTRGQEPVQPRARQLLMELYKPYNTKLAQLTGDRRYE  
KWNEQPASH\*

>Volca1|121489|estExt\_fgenesh5\_synt.C\_570023  
MSMDNGNEVGAYEFDRNALDNIARRRQDRPRKYSQHRLVDEFGVHKFARANNLSQFTACQLEDALSKER  
MLVLLKALLVLLKALLVLLKALLVLLKALLVSPQHQARTAGGVSVANTRPWSSRSRSVAMAAAAAGT  
AASSSSSSGEVPLFPPAGLPSDPAVSAIAAADSQRDLRDLYSATARKLDPGQLLALTQRLAHVTGAVV  
WPEDSPLPEAAPPGGAWAPVLYEQEAEEVVALAQLTCRATQVCLPEMYGMQVAVAGLLQDGPVLLATY  
TRISARLAGEGPGGGRSRADEAAEAEEAALGLGGLAALLWAAVMMEARPADPGPNVSSVAQLLRA  
CTASFFRSVLGCTADGRWMAELSAALRRLRELLAAPPVVAATEAAGGGGGSAAAAAASTLSPSSADS  
LQDMVSLLSAFQOMMYDPGPMWSNTCLQAAAVVQARTDPFSVQATAAIGSPPPGDALAAVFLTAQYDH  
PQDEATRGAALLMSLVRMGGQPSAEWVEAWAAAAEPLTRAGSGGGGGGGDVAAGFDVDMVAILATAAAEAQ  
IQLPDQLQDRMVMHGLIMQPAQAQAPQAAAAGAAAGPPSPVGDGVAVRSLPQFRQLLGIELQSYPL  
EPDVLLEPLTGLVEDFRLRGLPRELLSVLRVGLGSFSPVLPFFPYPSAAPSSSTSSSSSSAPAVLD  
SEWLGSLLEDLKVRRGGVGGPNDLMQMAQALSSLSAPPSLLSYVEVFAIALTGEDGRRRVPAPRRTTTTTA  
TTTTAATATAGSPAAAATKPSLAKIRLRLQKEASERRGAQPGQMAAGAPSAGAGEEEEEGGSGDEGDDG  
EEQQWSLAWPAMLGAFAAAGHLPERRWDRFAAATLPALESYEGPRLASTAVAALGLSSQAAAAAAAE  
SESEEEQQQEEDDEESKLPDLWHQALSRVAEIRACPVSMDEIRDQAVMLLSEQRQRQRRTAAAP  
GAAADDSDEDEYDNVELDDGANDDDPLASGAPLEFSADEFTDAVLTSSQLPMLLEPLAQPRVPLPPQ  
LLELLKDVAAEAAVEGAEEAVAAAREGAMSTAVAKAGGPGGRSSEGVSEAQGGMDLDALSYGQVVVTLVM  
QILISSDYPPGEEWMRRVGEMLVSRPEWGPSETGELQQQHLLLNADQLTSLSYLAGRFETPMKPEQV  
RLLLQHAARLAGSGELGGGELAATLVGLSGVTGVEVVEEGPEEVAVVLEALASQSGRLSAQGLSATAL  
LQLGLGLQSDMAVRFRAATARCLPELTPPQMLTVLTVGGSLGLEPPSRELLGTLSLQVGRLLAHSDDLAP  
AAATEAAVQVLKWFPEVAPNDSPTYIARLKSGLQPLLGRLEVVPAASAALLMASTGLVPEPSDIRGS  
SSRPGRAGPEEGQEEPRRLQQQQLYEARAVALAPLVDATAEGLPDYDNEQLSNAVMGLSLLGLQLS  
SSWLESFMESRRQLMDAGRSALYLLSGLADQRALPDGPYTAAFWSAVRRRAAPPDRDLDLLSGLTLE  
AAGQLGMRPDRELQSVLDCALLRYRESPDPEGLTELVAQSEGAGVMSAFSFPVSPA WATESERSRYLEA  
RTWLLNSITSQSPSNVRLACWEPLLAELAAPQRSPPDRVTDPHRGGGGPGGTAAVGSVPGLMELLTQL  
LMLVSEVWPEKVAALLLDRPQLFVDFQGGPSSRRILLWFSHFSMDGMRSFKYGSYALAHYALAHREEVW  
DLLHWEGKHPQAPVAVAAKTHYFCELALLPSFWSSEQWKECCRDGAVLELDRRYFCEVCELKRVLLNDRF  
KGGVHGEPTRGETHALHGGNRLAALLRDFLSAPAPLGPVPSQPHPHWQLLCKRLLHLQNDRQLLQVNTL  
AAGRSLPAAAPPSIIGVCGDGAGWQDLSFLVLRGGVEWGSVAEAVLAHALAAGRGLQRLLAEEEREELA  
GRLEIEQLAVELHGAPGCGEQEVAAPGPGGVCSAAHAALLGGRLDVCVCGGSAQDRLLLAELWTLR  
EALRRAQRAAESGGAAREGRGAGCAVPTPPPPSPPAAPVIPAPPRAAGTTSSSATTIATTTAAAPAAAPA  
PAAGRTADGGSPVSDRIAKLRSCGGGAAMLPLERVMAEVDGLVFERLQGGAGSGEGGSGRRAPAGGR  
SGNDTVAGGKHPDDNDDHHHDGAEGLMGLAPQGGGLPMPRRLKRKHKRKRYYETSSSSSSSTSSSSDSE  
GPGDRKQRRERCSSGLDGGGGGARRRGSRSRSGSLYGSCKSSNLAVAGHGELYGGRAEDSGEVE  
LDPLALFRGDGGEAWGSSRREGGLVWRVRLGGGAGRADEKTA VVEQPTTSGVEMVGGCDDLADFLAA  
LACSSVGRVSAFFALGKILLAISGLTTFPRPIKQVDDLTVRVEAAFHDHALSLLSISDALLASTPSLKPA  
LAKVQAAMQIKTNRTLAEDIQCFSDAMYWAQSNYELGRKLGVISAINSRVVPRAKEVTQLYNATTAPAPY  
GATPSAKVIVGLQDLVTEISSKVKTYENALLGLPENRPLPISIDLWIRELQAAQSAMNLSRWISALDVMS  
ASVQTLDAANSLLYNRLGAAMQAFVEAAQAQLSDYEASILRFNTTLERNISIDTFTDMANSFISGLMYRI  
NLTDVPKLVTYPLGLATKLELPWSARITPKWASLLMYDFYFVNGTRFKEQCDYAQTMLTLKDKRSVSR  
LRDVKPVVAQLSALRGTLATLQQLADGVQAALSAAYAGLSSDAMYGSLRTAVNAAKPAATNATAVANSSVT  
GEPALWRTIANNTAFAADFAADGSRGTMQILKDRMAELTYWLVDKVLGIGVLNEVTTTELGRILDRLSAAN  
WVLLSSGWNYSAAQLQPNSTVPPYAFLLQPLPQSMQLIYSALTDCIAAINDLLDQSLSKAPSLTGRARQL  
GQSSSPTAKPSGTAALRRELERYRNDTLAALHSDAVRRYSNLFYSTAVTVYSLLIATWLLGLALYFNFP

AGIAVGLMMLMLATCLLAGAWAAAAGMVTQAQDVCANIDAIVLDAVPPSSPLFPLVHYLQDIGSLTSIL  
RTTGLGDVSPLETTAINIINADILERFLLPPPADAISGVNFTKPWPSMYGTVQYPLADTLRLSVAANIS  
AQLSDLQTMSSRTA VLAQYRAITSWVCCGMGTQLLAVVWCAVPCGFLACLAGISALLVLKLENMPPDKP  
CGWICYNRKDRPFPGGWAPEGGVGPSNNTDAARKRSRPFVSVLLWRQGLGSAFGGFSNIGSAFFGDRTAI  
PDQNMKNPLGYGDASEPRGTELTSFQALPLSPTGGSPFGSPLSPRGINLGPSAPGPYNQPPMEYSP  
TRLPLSMGALPPTMMMPQPY\*

>Chlvu1|83984|estExt\_fgenesCV\_pg\_C\_160081

MADVLSMSLDDIINKNKSKTGGNVRAKDSGSKRGRDERKNGRKTAKAGTRGEGRTLPIIDSLRVVVKISG  
VSKAGGSRIGRGGQPRKAMPTREPKAPVDPEVLDGNKKWRHDLYDDLEQGPPIRNLQHRMRGPADGFRLM  
VTNLADGVTDDDIKELFESCGKVKYAGIHWDRSGRSTGEAEVYENKADALKAKSQFDNVALDQGAMSIE  
LFQSQGGERVLSGIRVAGGAEDGAGMRSNVAFTRSFQRAASGAMGAPRGRVGRGGGGFRSGGAGRG  
ASIQGIKQLGSLISFHSTFKEVDALKGICSKTVAIPDSEAGPCEADRRLSLLAELLFLENSRPVHRQL  
LSGLQRLPSNRFAAIQDAILDKVLA VVSDYNARKLTNGATPASTPASAQSEVQLPRAILADTMFSLLEYK  
PMSAKLRRVCTGALAVLAAGILDVLEAASTGLRIMQSSAEVQDAVSGMYAILQMHGGYIAGEAGPKGRE  
AVAAAAQAMLLLLQTPHVVAREALSSAAVLLGSACLLPAVPPAALAARIAAGLWQPEGALTDKRINSSGA  
DSCQQDGSVPSKETGIAEAAALRARGTPLAAELSRGPLSRVCAKLGWLSMLPRMLHGLTERPPEQQTAKH  
SYRTFKEPLQQTVRQIHSAFDALLDIEEVQOEQAALGLSAQAGAATQAFLEDTAREIMNAGGHRKGYI  
PLRALTSRLGATRLLLPALIRNTVNAMAGDAVCPAAAGLLEAVLGSRLRHECLARSGSQDEAMGQWRDA  
WLPVALGALTSANERLQTNVSVYGLPVPLCMDSGSLVLLQRILDPAFATPAPGASPDGQVAALVAVLKV  
ARQLQVRELDVAQVPGHAALPIPEALLQRAIGHAHEGLLDAMTLACVHPKTTAMPGPLELRVARGLL  
LGMRCVSTSLRNKWTTLVGKLLRRVATSTHGVLRHWASRPDAPGNADPADRAHDLAQLRQQAATRVVSR  
ALQGSLYPGAPFERKFLAMLLNTLLAVWNTPKAVRCSSPGIGQQNDGSLADLLRTADAQGVHLLCPGF  
LFPKTVLLGSVSDWDLRETATEALMALPAPLPGLEAPAQVAALLQWARKLVASPRVRES DAGARLQSL  
VGRKYVLRWRVQVRPDGSAAVDNQRQLSEADAEESFQAALAHQLSLADCLEADVVESEEDFAAACRH  
SLAHGNLLSLRYLVPDIPWQAQAKAHPRLRQMQAWIARVLSLLRAAETAQHPLSTPQETMAISAMDVDG  
SDMNFEDLEDDSDGEDSNDAQLAPRAQVIVTGCWLTKEVALLGLCLAREAPLSRDEAPESFFFEAVQL  
GGMGERLIHCMGVIKHNGAVEKAQAGFIALSERLLREPAPALNRLPGRWL VALLERVGAPGQGRDDIVRR  
SGGLPFAVFLHTKPSPPYATPMSATEGEVIEARAEQEPVPGRQQLPGEPAAGSPAVAFAAAA VLECCRA  
AEGVAAAIGGMSASEWEIRNSASLTFTSLVVRTVGFKNVLKGEAPKRAITGAEFFHRFPLLSYLLDQLK  
AAAAAMQSPA AKLHPSLYPILMDLLTPAAFAPVVKAFASARPLAVRHLAARALAPLIAPEELCTTLMELL  
DGVPCQAPIANHNEVHGRLQTRLLERNPASATATERDDLINQTAALAARRQLMRADGRIPAAIATEV  
LRTAAALVDIILKPSPPYATPMSATEGEVIEARAEQEPVPGRQQLPGEPAAGSPAVAFAAAA VLECCRA  
AVVGAGPSVVAGGSPLGGAGTDAADPMRSLFLKEAALLFFGGSLHGLLRQQAHAETPSDGSFSEACSG  
LREEDVASALAHPLYDVRATTLKALLRRFSAGGGVPGWLAELLRGHMTRETHHKATQRALQLLTLPVADA  
CAPSSADSNAGAGAEQAWAEVHALQRRLTEA QHPQVQERALRGLGAAMRGPAAALSQCQPPVAHMEADLA  
RLSIAQDGSAAALDPGCTALADFLAELKSFSAASLPSEMRLAAVTLQSSACTALPRPAEQEPTS  
TPGLVRDAAAAGADAMGAVAGVHCAGLHVQEIERQAFQFLGRCCGHLPAFQRQLMHVWVYRPEGRGALER  
EWQPGAVRKLFDKEIDNHHEPLAAQLAAWQLRSLCSSLQGPALAAAFSAALTAWLLQVLDLEETCGRL  
AEMHGRVSWPGGLTHHQDAFAPLSRMLLAPYAAAALFSSAADEEHNWLPVAVQKGMQRCAELLTRQPLQ  
LLGNTLYQVLTSLAQCGRSLGSEAVWKELGDAMDSEFSVLFLLAPHVPAGTLQNLDPIDFLT\*

## SUR1

>TAA1\_AT1G70560

MVKLENSRKPEKISKNIPMSDFVFNLDHGDPTAYEEYWRKMGDRCTVTIRGCDLMSYFSDMTNLCWFLE  
PELEDAIKDLHG VVGNAATEDRYIVVGTGSTQLCQA AVHALSSLARSQPVSVVAAAPFYSTYVEETTYVR  
SGMYKWEGDAGWGFDDKGPYIELVTPSPNPDTIRETVVNRPDDEAKVIHDFAYYWPHYTPITRRQDHI  
MLFTFSKITGHAGSRIGWALVKDKEVAKKMEYIIVNSIGVSKESQVRTAKILNVLKETCKSESESENF  
KYGREMMKNRWEKLEVVKESDAFTLPKYPEAFCNFYFGKSLESYPAFAWLGTKETDVLSELRRHKVMSR  
AGERCGSDKKHVRVSMLSREDVFNVFLERLANMKLIKSIDL-

>AOAT2\_AT1G70580

MSLKALDYESLNENVNKCQYAVRGELYLRASELQKEGKKIIFTNVGNPHALGQKPLTFPR  
QVVSLCQAPFLDDPNVGMIFPADAIARAKHYLSLTSGLGAYSDSRGLPGVRKEVAEFI  
ERRDGYPSDPELIFLTDGASKGVMQILNCVIRGQKDGILVVPVQYPLYSATISLLGGTLV  
PYYLEESENWGLDVNNLRQSV AQARSQGITVRAMVIINPNPTGQCLSEANIREILRFCC  
DERLVLLGDEVYQQNIYQDERPFISSKVLMDMGAPISKEVQLISFHTVSKGYWGECGQR  
GGYFEMTNIPRPTVEEIKVASIALSPNVSAQIFMGLMVSPKPGDISYDQFVRESKIL  
ESLRRRARMMDTDFNSCKNVVCFNTEGAMYSFPQIKLPSKAIQAQKAGKVPDVVYCLKL  
LEATGISTVPGSGFGQKEGVFHLRTTILPAEEEMPEIMDSFKFNDEFMSQYADNFGYSR  
M-

>SUR1\_AT2G20610

MSEEQPHANLAVPAFKTEKEPITQTRNGQSSVWRFGGSDKAAKASTVTLRGVIYMLFDNCGKDVNKTILP  
LGHGDPVSYPCFRTCIEAEDAVVDVLRSGKGNYSYGGAGILPARRAVADYMNRLPHKLTPEIDFLTAGC  
NQGIEIVFESLARPNANILPRPGPHYDARAAYSGLVRFKFDLLPEKEWEIDLEGIEAIADENTVAMV  
INPNPCGNVYSHDHLKVAETARKLGIMVISDEYDRITIFGDNPFVSMGKFASIVPVLTLAGISKGWV  
PGWKIGWIALNDPEGVFETTKVLQSIKQNLVDVTPDPATIIQAALPAILEKADKNFFAKKNKILKHNVDLV  
CDRLKDIPCVCPKPKPESCTYLLTKLELSLMDNIKDDIDFCVKLAREENLVFLPGDALGLKNWMRITIGV  
EAHMLEDALERLKGFCRTRHAKKTETETESLQALKLSDNMLEM-

>MicpuC2\_25369

MDTTNCDSLAGFSNRDITNWRVRATTLTQSKNPIRIVDDLLGKENPQKELISLAQGDPTAYGHLKPSSE

AVSAVVRAFSSGNDHGYTASTGSAACRAAIAAAHSHDFCHPLSLHDVYVTAGCSEALEHCIAVLVAPGKN  
ILLPRPGFPLYETLCQRHGVCVCLFYDLVPGRGWEVDLCSIRRLANTSTAAILNPNPCGAVYSRQHLE  
EIVGISSALKPLVLADEVYAGMTFRKEFVSLAEFSCSVPFVIGALSKRWLVPGWRLGWVCVHDIQGNLH  
GSGVRAAINNLCQISLGSAPIQAAVPAILATDDSVWLSEIMCALNRCITLSEKRVLNIDGLSIVSPPEG  
AMYLLVKIDLCAFRGCLTTSFAESLLSEESVLLVPGECFRAPGFIRVVTVPESLIQVAWDRIEAFCKR  
RFKG\*

>MicpuN2\_77545\_e\_gw2.01.358.1

MKVNPLVSKANNPIRSIVDDLVGKQNPADKLISLAQGDPTAYGHLKPPEEVAVAVVRAFSLGNHNGYTAS  
SGSAACRAAIATTHSCKNRPLSRDDVFVTVGCSEALEHCITVLAVPGANVLLPRPGFPLYETLCQRHG  
SFRFYDLLPETGWEVDLESVRRVYDDATAALLNPNPCGAVYSRDHLKDLVTLAQTLEPLIADEVYA  
GMTFGKPFIPVAEVAGKVPVLSVGLSKRWLVPGWRLGWLCIHEIGTTLYDSGVRTAINRLCQISLGPST  
PLQAAAPQILALDDSIWLRNVLRKLMSSAAAYSARVARIRGLRILSPPQGAMYVLVHIDRHAFLDCPSDL  
LFAEKLLEESVLLVPGTCFRAPGFVRIVTTVPEPVLQAAWDRVESFCARRCTRITQITDTSSSAREGH

>Ost9901\_3\_3820\_gwEuk.1.338.1

LISLAQGDPTVFGHLLPPKTAMDEVAGAFSTSAHNGYTASAGSATARAAMRYSLPDRPPLRTEDVFM  
VGCSEALSHSFAAMAVEGANILLPRPGFPLYETLCHRHLGKGYKFDLDDENGWEVKIDDVRRRLDENTVA  
IVVNNPNPCGAVFSEGHLEICETCHELRLPIIADEVYEDVAFDEDRPFLSIAAFSGRVPVMVVSALS  
RWLAPGWRIGWLVLDHYDHLQTAGVQLAINNLCQVSLGPPTPIQAAIPGIFKANETEWLKAATLGVLRRA  
SQRCVERCARVRGLVTPCEPQGAMYVLLKMNMGDAFKDANGFFTDVTFARLLAEESVLLVPGTCFHAPGY  
LRLVITVPDDELQNAWDRIETFCERY

>Ostta4\_14847\_e\_gw1.01.00.247.1

MTIERRKSDVGYHRDGNVNRASALRELCNPIRRIVDEMVGCANPNKALISLAQGDPTVFGHIAPPKAASE  
EVREAFERGTHTNGYTASVSGTSARSATRYSLPDRPALQIDDVFMVGCSEALSHALAALAVEGANVLL  
PRPGFPLYETLCHRHLGKGYKFDLDDENGWEVKIDDVFRRLRDEKTVAIIVNPNPCGAVYGEAHLRAIC  
EACDTRLRPIIADEVYEDIAFEPSPFLSIAFSGRVPVMAVSALSKRWLAPGWRIGWLVLDHYEHILQT  
AGVHLAITNLCQVSLGPPTPIQAAIPGIFKANETEWLKSTLNVLRCSSAYCIDRCARVRGLSVPEPQGA  
MYVLLKISVDTFRNDDGTYYDDVRFKQLLAEESVLLVPGECFHAPGYLRLVITAPHAEQQRAWDRIESFC  
ERYSSERKMTDSPKDLDAYVGEDLKQKHLVTSDDLVCKSLDAARTVI\*

>Phypa1\_1\_215944\_estExt\_Genewise1.C\_1210090

MVTFITHNSIQEKDVRFENGFRKGGSSVVVASTPEVKASQPQVNGDLKVLVLPATGVLSQEAKSDAEWNIR  
ASPAAIASNTPIRELLSCLCVSSRKKKESLAQGDPTAFGLKVPDAAVEAMVAATKSYMFGNYTHSAG  
SHECRKAVADYHSSSLPFLTAEDIAITVGCSSQAIQLCLAALSTEGANILIPRPGFPIYETFCYKYYDVEC  
RFYDLLPERDWEIDLQITSLADRNTVAWIVCNPNPCGVSRYRPHLLKIANAEKLIPLISDEIYANM  
IFGPTFTPMMAAFSMKVPVLTGGISKRWLAPGWRIGWIIIADPKGILARGKVVEALTRLMQMTIGTSTL  
SQAASVGMMLNTPSSFFEGTIKSLKAGAELCYERVQCIKGLQCPTKQGAMYIMVKIDPSVFTDIANDVE  
FASLLVEEESVVLPGSFGSPNWLRIVFATPLPLEEAWDRIDMFCLRHATAIPYTGTELY\*

>Selmo1\_145611\_estExt\_Genewise1.C\_100718

MASKVLDPDNINENVKCKVYAVRGELYLRASELQKEGKIIFTNVGNPHALGQKPLTFPRQVMALCQAPF  
LMDDPNVGLLFPDDAVARAKHYLSMTSGGVGAYSDSRGLPGVRQEVAFIQRKRDGYPSDPEHIFLTDGAS  
KGVMMMLNALIRNEKDGVLVPIQYPLYSASIALYGGILIPYLNESNWSLDFSDVRNQVVIARNKKIV  
PRALVFINPGNPTGGCLSVTNLQDLIKFCYKERLLMADEVYQVNVYQDERPFVSAKKVLMMDMGAPYSNT  
VELVSFHSVSKGFLGECGQRRGYFEMTNIHPQTVEELYKVASISLSPNVGQIMMGLMVTTPRPFDISYP  
QYQAESKAIIESMRRRAHIMTDGFNKCEDVVCNFTEGAMYSFPRIKLSKAAMDAQAQAGKAADVYFCLKL  
LEATGISTVPGSGFGQKEGTLHLRITLPLEQDMPGIMAKFKQKFAHDFMAQYSDYSVSSRL\*

>Selmo1\_75495\_e\_gw1.0.2222.1

METYSDELAPSSGSIKKKSASSISKRCSSVLDGGDSPYLLGWKEFQRNPYPVFNPGGCIQLGLAESKL  
SLDLLEQWLDSDHPEATRFVDEIAVYDPYAGLASFRKVFASFMEELVGGGQVAFDPPDNIVMTAGATAAID  
VLSFCLAQAGDVFVLPAPYYPGFTRDSRWRSDVELTPVESSANGFNVTASLKA AFHQCAKLGKVRAL  
LVASPSNPVGNLSLQADTLKQMLEFTKSEGIHLICDEVYAGSTFDDPEFVSIKIMESGDYDRASVHMVYG  
ISKDLGLPGLRVGALYSWNKQVLSTAARLGRFCVSTQTQCFVSAFLSDKEFVRDYLRNKKRKLKARRDW  
VVEMLRNTGTGCAKGNAGFYCWIDLSRFLKAPTEEAETELWKKVVYEVGLNLTGPSACHSPEPGWFRFCF  
ANQDEDTLEVAIIRLEDLRA\*

>Selmo1\_91640\_e\_gw1.12.423.1

MTWLSPLTIGNVNPVKISVDACSLIEFSLVQVMKCEYAVRGEIVMRAQLLEQELITKPSLPEEIIYC  
NIGNPQSLGQVPITFFREASVVALCDNPSLLDKAETHALFSADAIARAWKIIDKIPGKATGAYSHSQGLQ  
YCREEIAAAIARRDGYPAKAEDLYLTDGASVAVHMMMLQLLISSEKDGIMCPIQYPLYSASMTLHGGSLV  
PYYLNESAGWGLEVQELQQIQKARGSGINVRALVINPGNPTGQVLEENQKKIIQFCKDERLLLLADE  
VYQENIYAEGKKFQSFKKVARSMLGENDSIVSFHSVSKGYGECRRGGYMEVTGVDKDVKEQIYKIA  
SVNLCSNISGQILMSLVSNPPKAGDESYEDYVRERDGIASLARRAKLLAEGFNKLEGVSCNQAEGAMYL  
FPRLHLPERALKA AAAAVSMAADTFYARRLLDATGIVVPGSGFGQVPGTWHIRCTILPAEEKMPALITRL  
TSFHQRFMDEFDRD\*

>Selmo1\_91812\_e\_gw1.12.730.1

AVPNSVLDLFFATCDPGDGLIPAPYFPAFNDNMNIRNEVAPLPVQPKDTHTYIPTIAEMDAAVDEAA  
KRNVRARVLLITNPGNPLGTYPEATLKELLLWAVRREMHVLSDEIYANSKFGTSEDEFVLEKVAQNAV  
EEKLLSPEMVAEFVHTAYGMSKDFGMNGFRVGLHTKNGDLLNLWQNMGMFAAVSNDTQHALAVMLQDDT  
FVDFYVEENKRRLLKNSYNLLTSAFTSVKLNYPACAAMFCWLDLRSLLTECTFEAERALWKEILEDCKVL  
LTPGEACHYAEPGFVRVYASMPPEHLQVACTRLTSFVEKKRRKRKLSA\*

>ChlNC64A\_1|48481|fgenes3\_pm.C\_scaffold\_2000036  
MAASHTAAAPVDTTLNPRVAALKPSKTMALTDLATKKEEGADIIGLAAGEPDFDTPAPIVEAGVEALRL  
GLTRYTPNTGTSALRKA VCAKLEAENGVRYDPDQIVVSNQAKQCIWQALLAVCAPEDEVIPAPFWVSY  
EMARLAGATPVIVEATPQEGFKLTPASLRAALRPRSRLILCTPSNPTGAVYTREELEALAEVVAEHPRL  
LVLSDEIYEIVYRPAAHHSFAALPGMYERTLTVNGFSKAYAMTGWRLGYLAAPRHFAKAAAVIQSQSTS  
GASSIAQHAAVAALGMGPQGGPLVQDMIAAFEQRDFVTQRLQQIPGVGLAAPQGAFFVVMPEVAAFVGP  
VEARGWGPVEDVDALCRCTRHSPPACLAPPCACLPAHPFHLSFLFCRYLIETANVALVPGDAFGAPSC  
IRISYAASMETLEKALDRVAALALGNFTRAG\*

>Chlvu1|80584|estExt\_fgenesCV\_pm.C\_70018  
MLLSDLASSLKESGVDVVTGITHYTPNVGTGAIRAALVKKLAENGLTYAANEIVVTNGAKQAIWQSLLA  
VCSPGDEVLPAPFWVSYPEMARLAGAEPKIICDGADEGYLLTADQLRAALTPASRLILCTPSNPSGAV  
YPLSRLQELAEVVAEHPRLMVLDEIYEHIIYPPAEHHSFAVLPGMWPRFTVNGFSKAFAMTGWRLGYL  
AAPRDFAKAAAVIQSQTTSGASSIAQHAALALGLGKAGGQPVAAAMRAAFQERRDYVMERLQRIEGRVVA  
APDGAFFVLPDLSAFFGTDVHADDFGPIPDADTLCRYLEKGNVALVPGDAFGAPACLIRISYAASLETLQ  
KGLDRIEGALTSALHRPALAASR\*

>Volca1|103084|estExt\_fgenes4\_pg.C\_30343  
MFVMHNSTAHRSNHSIACGGRTCIERLARATTPHCPTSSVITATRAKTISMAAAAAAPTNSVVPVDT  
TLNPLVASVKPSKTMALTDLATSMKEAGIDVIGLAAGEPDFDTPAPIVEAGVAALRAGYTRYTPNTGT  
LRKAICKKLQDDNGLSYSPDEVVVSNGAKQSIWQAVLATVSPGDEVIPAPYVWSYTEMVRLANATPVV  
PTTPEEGFLMSPEKLAATLTPSRLLILCSPSNPTGAVYPKEHLEALARVVGAPRLLVLSDEIYEIYI  
APAKHVSFGALPGMWDRTLTVNGFSKAYAMTGWRLGYLAAPRIYAKAAAVIQSQSTSGASSISQQAALAA  
LALGPGGGPEVQMVRAFQERRDFVCARLRGIPGVNLAEPGAFYVLPMSAFFGPGAHADGFGVPVPSD  
TFCRYLIEKANVAVVPDAGADSCIRISYAASLETLGKALDRIAASLDPKIYKRRTGSS\*

>Chlre3|118364|e\_gwW.24.42.1  
MSAAAAPAGAVKVDTTLNPLVASVKPSKTMALTDLATSMKESGIDVIGLAAGEPDFDTPAAIVEAGVAAL  
RQGYTRYTPNTGTSALRKAICKKLKGRAGGVGVRGSVWVAYEKKGKACGKSGRAATDICTRGGAGGLLAPS  
HETYEALSTRAGARALRLPTRVPVSHALTHSPELDRAPPHTPTRPRSRLILCTPSNPTGAVYPKEHLEA  
LAAVIAKHPRLLVLSDEIYEIYIYAPATHVSFGALPGMFERTLTVNGFSKAYAMTGWRLGYLAAPKHYAK  
AAAVIQSQSTSGASSISQQAALAAALGPGGGPEVQAMVRAFRERRDYVSARLKAIPGVNLAEPAGAFYV  
LPMSAFFGPGAAQGFAGVPDSDTFCRYLIEVANVAVVPDAGADSCIRISYAASLETLGKALDRIA  
ALDPAVYTLRTDRQ\*

## TAA1-TARs

>ALAAT1\_AT1G17290  
MRRFVIGQAKNLIDQSRRLQLHHKNSLFSVSLIPFAPSDDSSSRHLSSSSSSDMSASDSSSLPVTLDT  
INPKVIKCEYAVRGEIVNIAQKLQEDLKTNDKAYPFDEIYCNIGNPQSLGQPPITFFREVLAALCSYAL  
LDESAATHGLFSSDSIERAWKILDQIPGRATGAYSHSQIKGLRDAIADGIEARDGFPADPNDFMTDGAS  
PGVHMMMLQLITSEKDGILCPIQYPLYSASIALHGGTLVPYYLDEASGWGLEISELKKQLEDARSKGIT  
VRALAVINPGNPTGQVLSEENQRDVKFKCKQEGVLVLLADEVYQENVYVPDKKFHFKKVARSMGYGEKDL  
ALVSFQSVSKGYYGECGKRGYMEVTFGTSVREIYKMASVNLCSNISGQILASLIMSPKPGDDSYES  
YIAEKDGLSSLARRAKLLEEALNKEGVTCNRAEGAMYLFPCLHLPQKAIAAAEAKEKAPDNFYCKRLL  
KATGIVVVPSSGRFQVPGTWHFRCTILPQEDKIPAIVDRLTAFHQSFMDFRD

>TAR1\_AT1G23320  
MMVGCENSKKSDSGSNEDKSLSDDIINLDQGDPTAFQEYWMKKDRCTVVIPAWDLMSYFSDTKNVCWFL  
EPELEKAIKALHGAIGNAAATEERYIVVGTGSSQLCQAALFALSSSEVVPVSIIVAAVPPYSTYVEEASYL  
QSTLYKWEGDARTFDKKGPIYELVTPSNPDGIMREP VNRREGGKVIHDLAYYWPYHPITRRQDHDL  
LFTFSKITGHAGSRIGWALVKDIEVAKKMHVYLTINSIGVSKESQTRATILNELTKTCRQSEFFEY  
YEKMKSRWERLREVESGDAFTLPNYPQDFCNFFGKTLSTSPAFAWLGYKEERDLGSLLEKVKVLRGGD  
RCGCNKRYVRVMSLSRDDDQVSLQRLATIKDLKCVLP-

>TAR3\_AT1G34040.1  
MIHNKLLIAGSIILNLVFTIHLNNSTWSPTWTNRAALEAEAAASVSCSGHGRSYVDGLGVLDGHKPC  
ECHDCYTGKDCSVLLKDCPVDANSQDPLFLEPFWIRKAEESAVVESGWHRMSYTFNGYGLFMSAELEKII  
RKLHNVGNVAVDNRFIIFGAGATQLLAASVHALSQTNSLSPSRLVTSVPYYNLYKQADFFNSTNLKFE  
GDASAWKRSENRDDIKQVIEIVTSPNPDGKLRKRAVLDPNVKYIHDYAYYWPYFSPITRQADEDL  
LSKTTGHAGSRFGWALVKEKTVYEKMKIYISLSSMGVSRDTQLRALQLLKVIGDGGNEIFRFGYGTLLK  
RWEILNKIFSMSTRFSLQTIKPEYCNFYFKKVFREFTPSYAVWKCERPEDTDCYEIFKAAKITGRNGEMF  
DERFVRLSLRSQDDFDQLIAMLKFKVSKAEVVDSDI

>TAR4\_AT1G34060  
MMQKLLLVISILNLVFTIHLIYSSTTWNPTWTNRAAAEAETVASFSCSGHGRAFDGLGVLDGQKPP  
CECNKYIGKDCSVLLKDCPVDANSQDPLFLEPFWIRKAEESAVVESGWHRMSYIYEDGTYVSRELEKVI  
RKLHVVGNVAVDNRFIIFGAGATQLLAASVHALSLTNSVSSPARLLTSIPYYAMYKQAEFFDS  
FEGNASAWKQSGRNDNITQVIEIVTSPNPDGKLRKRAVLDPNVKTLHDYAYYWPYFSPITHPVDE  
LSLSKTTGHAGSRFGWGLVKDKAIYEKMDRFRILTSMGVSKETQLHVLQLLKVIGDGGNEIFRFGYGT  
KRWETLNKIFSMSTRFSLQTIKPEYCNFYFKKVFREFTPSYAVWKCERPEDTDCYEIFKAAKITGRNG  
GSEERFVRLSLRSQDDFDQLIAMLKLVYHEEDVPSNFMYI

>TAA1\_AT1G70560  
MVKLENSRKP EKISNKNIPMSDFV VNL DHDGPTAY E EY WRKMGDRCTV TIRGCDLMSYFSDMTNLCWFLE  
PELEDAIKDLHG VVGNAATEDRYIVVGTGSTQLCQA AVHALSSLARSQPVSVVAAAPFYSTYVEETTYVR  
SGMYKWEGD AWGFDK KGPYIELV TSPNNPDGTIRETVVNR PDDDEAKVIHDFAYY WPHYTPITRRQDHI  
MLFTFSKITGHAGSRIGWALVKDKEVAKKMVEYIIVNSIGVSKESQVRTAKILNVLKETCKSESESENF  
KYGREMMKNRWEKLREVV KESDAFTLPKYPEAF CNYFGKSLESYPAFAWLGTK EETDLVSELRRHKVMSR  
AGERCGSDKKHVRV SMLSREDVFNVFLERLANMKLIKSIDL-

>TAR2\_AT4G24670.1  
MGQIPRFLSWRNMLVLSLAINFSLILKILKGRDRERGDSWDRTA YVSIWV VSTTASESSLSASCSNYK  
IEEDDDRIINLKFGDPTVYERYWQENGEVTTMVIPGWQSLSYFSDENNL CWFLEPELAKEIVRVHKVVG  
AVTQDRFIVVGTGSTQLYQAALYALSPHDDSGPINVVSATPYSTYPLITDCLKSGLYRWGGDAKTYKED  
GPYIELV TSPNNPDGFLRESV VNSTEGILIHDLAYYWPQYTPITSPADHDVMLFTASKSTGHAGIRIGWA  
LVKDRETARKMIEYIELNTIGVSKDSQLRVAKVLKVVSDSCGNVTGK SFFDHSYDAMYERWLLKQAAKD  
TKRFSVPDFVQRCNFFGRVFEPQAF AWFKCEEGIVDCEKFLREEKILTKSGKYFGDEL SNVRISMLD  
RDTNFNIFLHRITSSFNSTL-

>ChINC64A\_1\_49237\_fgenesh3\_pm.C\_scaffold\_29000018  
MAAADFIRPHLLKLPYTPIEFEILAQRLGREAKDIVKLDANENPYGPPPEVLAALGSMPPFNIPYDPDE  
SRRLREALSKWHSVPSEHLLVGC GADELIDLLMRCVLDAGDKIVDCPPTFTMYVFDAAVNNASVVTVPRL  
EGFRIDVEAIKRAVAEHKPKMVFL TSPNNPDGSMLSTEELLEVLRLPVLVVLDEAYIEFSEEPSKMGWVA  
QHPNLVVLRTFSKCAALAGLRVGYGAFPLDMIQYLWRAKQPYNVSVASEVAAVAALS NLPYIERVRDALV  
AERQRLFEGLGPIYLEPCSHSNFVLCKV ANGRDARGLKDALAQHGIMVRHYSTKELNNYVRVSVGLP  
EHTNKLLAALRTLA\*

>Chlre3\_103841\_e\_gwH.28.33.1  
MEPSTSTSSAPSSQFLRKHILKAPYTPIEFEVLSRYNRKPEDIIKLDANENPYGPPPEVREALATM  
PFPHIYDPETRALRRALAE MHNIPMENLLVGC GADELIDLLMRCVLEPGDKIVDCPPTFTMYVFDADV  
DARVVTVPRLDGFRIDVEAVKRAVVEHKPKV VFL TSPNNPDGSMISEADLVSILDLPVLVVLDEAYIEFS  
TEASRMHWVLRHNLVLR TFSKSAALAGLRVGYGAFPIGMM EYMWRAKQPYNVSVAAEVAACAALTNMN  
YLN TVRDALVSE RERL FARLKEIPLEPYPSHANFILAKVTNGRDAKAVKDALATQHGIMVRHYAKKELS  
GFIRVSVGRPEHTDKLIEALKQL\*

>Chlvu1\_34460\_e\_gw1.25.56.1  
MAFHGLLPQSAPVLC DNTLRNRCQQLISLRAARPVVCSASPAVEVAPSMNGSCTDTFIRPHLRKLAAYT  
PIEFVLSKRLGRAPEDIKLDANENPYGPPREVLAA LGDMPFNIPYDPETRRLSALAE LNDIPMEH  
LLVGC GADELIDLLMRCVLDPGDSIVDCPPTFTMYAFDAAVNGANVITVPRLDGFRIDVPAIERVVRERR  
PKMVFM TSPNNPDGSMITEADLLAVLALPVLVVLDEAYIEFSEEASRM R WVMERP NLVVLRTFSKSA  
GLA GLRVGYGAFPA G MIDYLRWRAKQPYNVSVAAETAACAALTNPQYLQDV RDKLVVERERLFGLLQDV  
PFLEP YQSSANFILCKV VGGQDAKAVKDTLASEHGIMVRHYAKAELSGFIRISVGRPEHTDALIAALRTLEQ  
PVA AVVEE\*

>MicpuC2\_49460  
MTTGTLRGQKICRTATASSNSRYVRKHILELAPYTPILPFEVLSSEKFGFLPEDIVKLDANENPYGPPPEV  
AEALSSLKFPHVYPDPESRQLRQLTAKETGVPFENLIIGCGADELIDLLMRVVIDPNDVVINTPPTFGMY  
AFDCAVNGGTVDVPRCNADGFKIDVEAIQRAVYKHKPKLLFLTSPNNPDGCVLSDRELLMLLELPVLVV  
LDEAYIEFASCKSHIADVVKYDNLVLR TFSKCAALAGMRVGYGAFPKGLIDYIWRAKQPYNVSVAAEVA  
ACAALS NPEYLQEVKGLVQERTRLHSLLSRISYLKYPSEANFVLCRVIGRDALQLKEKLAKNGIMVRH  
YSSPESISGCIRISVGRPEQTD AIVAVLSAI\*

>MicpuN2\_54982\_EuGene.0100010209  
MFDHTQCVVRSLLLEKLGRTL PVKGRHRKTIVIHANSNVRNPNIAKLQAGYLFPEINRIKMKHLEENPD  
AKIISLGIGDTTEPIQPITKAMAAA AENLGTLDGYAQYGGYGAEQQTLLREKLAERFYAEVNIQASDI  
FVSDGSKCDISRLQMMFGSNRRVA VQDPSYPA YVDSVMIGNTEMYDHASKQY GKIVYLACSENDFPN  
LGLAKDAELIFFCSPNNPTGAAATRDQLIELVRHAKETGSIIDYDAAYAIYISNPNCPKTIFEIPGADEC  
CIETCSFSKYAGFTGLRLGWTVV PDKLKFADGSLVKNDWNRLMCTSFNGASNIAQAGGMACLSDEGMNAM  
SELVSFYKENATILKNTFEEMGYAVYGGTDAPYVWVSFDGRDSWEVTFEVLTKCDIVVTPGSGFGPAGDG  
FIRCSAFGHRENILEAAQRLKESFSRS\*

>MicpuN2\_93189\_estExt\_Genewise2Plus.C\_Chr\_010853  
MHCHALSTSGARFVRKHILRLAPYKPIVPFEILSEELGIAPEDIVKLDANENPYGPPPEVEMAMSNLRF  
HVYPDPESRTLRRALAADCNVVENILVGC GADELIDLLLRVLD PDDVVINTPPTFGMYSFDCAVNGGK  
IIDVPRQLSYPFAINVQEIEKAVLQHEAKVLF LTSPNNPDGGIADADIDRLLQLPVLVVLDEAYIEFSD  
SASSRISDVPKRQNLVVLRTFSKRAALAGMRIGYGAFPNGLIEYIWRAKQPYNVSVAAEVAACAALGNKE  
YLT MVKNLIVEERDLRFSVLSNCPYLTPYPSDANFILCRVEGRDALELKEQLASRGIIVRHYSSPPSISG  
CLRISV GKPKHTDALRDALENLGAGNQISASASE\*

>Ost9901\_3\_30059\_eugene.0200010246  
MISHVGSIRNFKGLSCSRSQHKHTHTSRKNHSASRLCSRLQSSSGDISSNFVRKHILDLPYTPIVPFEV  
LSEKLRPITEIVKLDANENPYGPPDVYDALRDIKYPHIYDPESRRLRAALAAECAPVTENLLVGC GA  
DELIDLLLRVLEPGDKIINTPPTFGMYSFDCNINAGDVIDICRGLSFKIDVEAIEAAV KTHSPKLLFLT  
SPNNPDGSLIEEDDLLRLLRPVLVVLDEAYIEFASAKSYITQVPSRKNLIVLR TFSKRAALAGLRVGYG  
AFPSDLIEYIWRVKQPYNVSAIAETAALAALS NPSYLQEV RDKIVFERARMFGLLSEFDFLEPFTSES NF  
ILCRV KRMSAEYVKA CLLERGVVIRHYSSPKIADCIRISVGRPEDTDAVVSALASIKL

>Osta4\_22755\_estExt\_fgenesh1\_pm.C\_Chrom\_03.00010014  
MAQLKAGYLFPEIARIRTAYLEKNPDAKVISLGIGDTTEPIPAAITKGMVEAAAAALGTVEGYSKKGGYGP  
EAGQADLRKA VAERLYKGTPTFEDVFCSDGSKCDISRMLQMFAGGRKIAVQDPSYPAYVDSSVMIGHST  
GFNDGVKQYQNTYMPGCAENDFPDLAARDAAELIFFCSPNNPTGAAATREQLTQLVNQALETGSGFIY  
DAAYSAFVSDPNCPTSTKSSAKYAGFTGLRLGWTVFPEALKFSDGYSLNGASTVAQSAGLACLSDGGMK  
AMEDLVNFYKENAAILKRTWEEMGYKTYGGTDAPYVWVSFDGRDSWEVFTILEKTQIVTTPGAGFGPAG  
NGYVRCSAFGSRENINEAARLKEAYSK\*

>Osta4\_31051\_0200010382  
MSARFRLAHNPKMYLNGRGPVPHRQKSSSTRNSSHSRAKSSRTSNELITTDVFRKHIINLPYTPPIFFE  
VLSEQLQRPTSEIKLDANENPYGPPPEVYDALRVTYPHIYDPESRRLRAMLSSECKVPAENLLVGC  
ADELIDLLLRVLEPGDKVINTPPTFGMYSFDSYINGITDGCVIDVKRGPAPSFVVDVGIERAVAHEHP  
KILFLTPSPNPDGSLDESLELLCLPVLVVLDEAYVEFSSSYSTRIAEVPNRKNLIVLRTFSKRAGLA  
GIRVGYGAFPNELIEFIWRVKQPYNVSVIAEAAAMAALSNTPTYLQDVRDKIVCERARLFTLLSQDFMDP  
FPSESNFILCRRVCHSCTRALCSTSCRVTGASAEFIKSLARGIVIRYYSPPKEISDCIRISVGRPEDT  
DAIIAGLTSISSK\*

>Phypa1\_1\_112298\_e\_gw1.3.147.1  
LCSGDPTMFEEFWRHEVSSITVILGYQRMSYFAQSKHVWFMELELQIRALHEVVGNAVTEGRHIVVG  
TGSTQLFQATLYALTSPDQPKPTNIVSAAPFYSSYPVTDYLRSAFKWVGDAAKFSLGVEREPEYIEMV  
CSPNPDGRIQHAIVNGTGHVVDHLYYWPHTYPTITEAADHDIMLFTLSKSTGHAGTRIGWAILKDEKVA  
KKMMKFVELNTIGVSHDSQVRATQIVKSVVQGYAYSSANNKLFHFGASVMHYRWRRLRDSLGSSEFSI  
PEFQPSYCNFFQKQVNHAPAFAWLRKRKVVDCAEFLKENRIISRSRGRHFGVGTGYVRLSMLERNQKFEML  
LSRLARIDSSRTPD\*

>Phypa1\_1\_113303\_e\_gw1.6.104.1  
GDPTMFEAYWNAHKDDHVKVGYANDTLYFVKSKEQEGCPWFVSALLDDAIRELHSFVGNVAVTGDRIVV  
GNGSTQLFQAALYALATRDGTSTPVVSEAPFYSAFREIIDYLSKLFHWAGDSKTFHPKANETFIEMVTT  
PNNPCGTMREGLGLGDKGTIVHDLAYYWPYVPIISSFSDVMLFTLSKCTGHAGLRIGWAVVKNPAVAK  
KMAEFVALNTIGLAQDAQSRAAGLIRITIRITEALLAKKFFHWSRQVMESRWVVKVRSALAGNKNFSLQNNV  
ASATHTFSTCTFSGTSHSTYPAFIWLKCEKEGTDCQMILKRNGILGRNGALFGVSTQYARLSLLDHEPAV  
DLLVERLTTLEC\*

>Phypa1\_1\_118724\_e\_gw1.26.202.1  
DGCVGINSGDPTLFEEYWLTQPDAPTIIPSWQGLSYFAHRHNSYLFVDSFLEQTIRQLHGMIGNAVTEGR  
FLVLGVGSTQLYQAALYALTSPDQPKPTNIVSAAPFYSSYPVTDYLRSAFKWVGDAAKFSLGVEREPEYIEMV  
IELVTSPNPDGSMNKA VVNGNGSVINDLAYYWPHTYPTITAPADYPIMLWTLTKITGHAGTRIGWAVVED  
EKIATKMAFFVQMNLTGVSQDAQARGVTLRSITSSYNTRPERQPFHLSQAVLEDRWARMSQALQNSSR  
FVLPFEFPAASCSFFGRAFPNPFMWLCKKVEDCAQLLKDHIISRGGRAFGVSTQYVRSMLDRRPLF  
DLLSRLAALH\*

>Phypa1\_1\_131332\_e\_gw1.88.56.1  
SGNGNVFVDIVDNDGGTAACECNDCTGPDCTPVRECRADSDSGDPLLFAYWRANPNLGTVPVIGWY  
RMSYLTRDNAAILYTDALLRTIRDLHGMVGNVTKDRYIVVGTGSMQLINAVVHSLALLNSDRVSSVAK  
APYYSAYKVQTEYLDSPFNFAFDPARFTGNATGRGAQIELIASPNNDPAQIQEVQNISEHVYDHAYN  
WPHLSPITKASDHIMLFTLSKITGHAGSRIGWAIKDYNLRYTVQVYVVLNLTGVSHEQLRATQLIRT  
IISYSEGIRNEKGLFHYGREVLESRWATIQSILKNSSRSLQELKPDYCFFFAQIVDPSPGHAWIRCNY  
EEDVDCAAVMLSAGIIGRKFSGNRVRLSLLKRRSHFEILTARLTKLVAQTSST\*

>Phypa1\_1\_191756\_estExt\_gwp\_gw1.C\_1670077  
MADFDTESLGIKCYECFVGGVDCSQVIDNCVIDLDHGDPTMFEEFWRNAANTITVILGYQRMSYFAQS  
KHVWFMELELEVQIRELHRVVGNAVTEGRHIVVGTGSTQLFQATLYALTSSDQSKPTNIVSAAPFYSSYP  
AVTDYLRSAFKWAGDAVEYNLGAHEEPEYIEMVCSPNPDGRIQHAIVNGTGHVVDHLYYWPHTYPTIT  
GAADHAIMLFTLSKSTGHAGTRIGWAILKDERVAKKMTKFLNLTIGVSHDSQVRATQVIKAVIEGYTSS  
EPQSGSPQVAQHSNKNLHFGNSVMHYRWKRLREALNGSSAFSIPGFQPSYCTFFQKDIDQTPAFWL  
RCKKTADCAFLKERRITRSRGRHFGAGAEFVRLSMLERNQKFEMLVDRLARVEASRTPD\*

>Phypa1\_1\_204939\_estExt\_Genewise1.C\_230157  
MEADDTARLLPLASWQSTHKNSTEAKFSLRNVLVYVSLVNLPALVIVFHPIQGFLWTPPRSEQPAAPQ  
WAEAVQAAERAASKWCSGNGNVFVDTVGIDADGSPSECCNDCFAGPDCSLPLPDCVADAISGDPPLLFAY  
WRKNSDLGAVVIPA WYRMGYQTRDVTSMPTALVASIRELHAMVGNVAVTEGRYIAFGTGSTQLINAVIH  
SLALQDPGRVTPVSKAPYNYAYYTQTEYFKSPFYSFSGEPDRKVGQQGPAQIEVIASPNNTTQIQEVP  
QNVSGHVVDHAYYWPHLTPITKAVDYDIMLFTLSKLTGHAGSRIGWVILKDFDLYTKVLRVADVSTIGL  
GHEAQLRASQLRTIIDGYSEGNSGREGIFHFAHDVLSQSRWAKLQAIQNVSRFSLQELKPGYCSFFKRV  
SDPSPGYAWIRCNEEDADCSAVLSAGIIGRAGPIFGTTPRYVRLSLLKRASHFDNLADHLLKLVAQS\*

>Selmo1\_163364\_estExt\_Genewise1.C\_1900030  
MAAREMILSAAVCLCSIAAVRLMDLYWDSPPGPHWMEQESGALRASCSGHGRVFNDSGLACECSDCY  
TGVNRESELQHGCMVDADAGDPTFLEPFWMEHAGADAGVFMPSWYRMGYSVKKGSSPAHKELPLVYVIKEL  
EDSIRELHELQVGNVVKDKYL VIGTGSMQLVAAALNALSDFSFEKPGA VVTRAPCYMIYKLVQVLDSSSK  
FQWGGDAVAAFEKKAFFDSSVVELLAAPNPDTSILEPVYKGTNAKIIHDKAYYWPHTYAIAGALDEDVM  
LFLSKTTGHAGSRIGWALVRDIEVYKMFMYIAVSTIGVSRSQLRAHRLIKSLLDGYQNGGSHKARMF  
DFGYHTLQSRWQTLAEIFKASTRFISQKTDSCSFFKKEVSPSPAYAWIRCEQEEDCHSIFAAAGNGR  
PGRAGVSNRYIRLCMIKRDEFFELLAGKLQALVDTELTNE\*

>Selmo1\_171289\_estExt\_Genewise1Plus.C\_140087  
MFEAYWRANGDSCTTVILGWEMSYFASRKHFLWFVEQELENEIRQLHSLVGNVAVTDGRFIVVGTGSTQL  
FQAALYAVSPRDGAQPASVVSAPVYSSYPVLDYDKSGIHKWAGDAANFHLADSSSSSSSYIELVTSNN  
PDGSMKHAVVQSGPVIYDLAYYWPHTPITAAAHEHDMMLFTVSKCTGHAGSRIGWAIVKDAQVAQNMAK  
FIELNTIGVSHDSQLRAAQILKISIGRFLHFGYSEMSRRWDLQAVKVSDFSLPEFSPAFAFFGQVT  
SPHPAFAWLKCNRSDCKEVLKGGVLSRSGVQFGVGPDYVRISMLDREGNFETFIARLSDMAAASLAST  
AASYQEQL\*

>Selmo1\_176918\_estExt\_Genewise1Plus.C\_370084  
MFEAYWRANGDSCTTVILGWEMSYFASRKHFLWFVEQELENEIRQLHSLVGNVAVTDGRFIVVGTGSTQL  
FQAALYAVSPRDGAQPASVVSAPVYSSYPVLDYDKSGIHKWAGDAANFHPADSSSSSSSYIELVTSNN  
NPDGSMKHAVVQSGPVIYDLAYYWPHTPITAAAHEHDMMLFTVSKCTGHAGSRIGWAIVKDAQVAQNMA  
KFIELNTIGVSHDSQLRAAQILKISIGRFLHFGYSEMSRRWDLQAVKVSDFSLPEFSPAFAFFGQVT  
TSPHPAFAWLKCNRSDCKEVLKGGVLSRSGVQFGVGPDYVRISMLDREGNFETFIARLSDMAAASLAS  
TAASYQEQL\*

>Selmo1\_406798\_fgenesh2\_pg.C\_scaffold\_6000049  
MAAREMILSAAVCLCSIAAVRLMDLYWDSPPSPGPHWMERESGPALRASCSGHGRVFNDDGDLACECSDCY  
TGVNCSLQHGCMVDADAGDPTFLEPFWMEHGADAGVFMPSWYRMGYSVKKGSSPAHKELPLVYVIKEL  
EDSIRELHEL VGNVAVKDKYLVLTGTSMQLVAAALNALSDFSPEKPGAVVTRAPYMIYKLVQVLDLSSSK  
FQWGGDAVAAFEKKAFFDPSSVVELLAAPNPDTSILEPVYKGTNAKIIHDKAYYWPHTAIAAGALDEDVM  
LFLSKTTGHAGSRIGWALVRDIEVYKMFMYIAVSTIGVSRESQLRAHRLIKSVLDGYQNGGSHKARMF  
DFGYHTLQSRWQTLAEIFKASTRFSIQKVDSDQHSFFKKEVSPSPAYAWIRCEQEEDCHSIFAAAGINGR  
PGRAFGASNRYIRLCMIKRDDDEFELLAGKLQALVDTTELTNE\*

>Selmo1\_423204\_fgenesh2\_pg.C\_scaffold\_60000142  
MAAGSPRDEEKPLLHYVSSIKIITGRARHPQKAAAIPCSGHGRVFLDTILAANGEPSCECNRCFAGTDCS  
SKIKNCNAKVDSGDPMFLEPFWDANAEGAVVIPPVHRMSYLTEATAEGRRITLRLERLIRQVHEFVGN  
VIKDKFIVIGTSMELINAAVASLAPIASNTLPKSPPALVVSRAPIYQAYQMOTEFFASTQYIWWGGEPSI  
AAKKFANTGSTFIEFVAAPNPDASMKEPELKFNGSFTVFDRAYYWPHYSPIFKAMDDVMLFTLSKLTG  
HAGSRLGWAIVKDPKVYARLSQYVLLNTNGVSHDTQLRASRLRAVLEGYSTTGAKTGVRDPQVYAKSQH  
IFHFAQSVMNSRWQKLEKIFARSMQFSLQYVEAQCNFFKAIISPPSPAYAWVKCEDPGLIMNSSCFNVFK  
NAGIIRAGGYGDERDINSYVRFALLIGNDDFDNFMEHLNKLFLTE\*

>Selmo1\_75581\_e\_gw1.0.2224.1  
MAAGAPRDEEKPLLHYVSSSTHPVWVSKQALLSLLLNLALLAFAIAVFFLQSEFFHLGRSAGVLRSSRDY  
HWTSKASAEAEKAAAIPCSGHGRVFDVDTILAANGEPSCECNRCFAGTDCSSKIKNCNATVDSGDPMFLEP  
FWDANAEGAVVIPPVHRMSYFTEATGEGRKITLELERLIRQVHEFVGNVAVIKDKFIVIGTSMELINAA  
VASLAPIASNTLPKSPPAIVVSRAPIYQAYQMOTEFFASTQYIWWGGEPSIAAKKFANTGSTFIEFVAAPN  
NPDASMKEPELKFNGSFTVFDRAYYWPHYSPIFKAMDDVMLFTLSKLTGHAGSRLGWAIVKDPKVYARL  
SQYVLLNTNGVSHDTQLRASRLRAVLEGYSTTGAKTGARDPQVYAKSQHIFHFAQSVMNSRWQKLEKIF  
ARSMQFSLQYVEAQCNFFKAIISPPSPAYAWVKCEDPGLIMNSSCFNVFKNAGIIRAGGYDDERDINSYV  
RFALLIGNDDFDNFMEHLNKLFLQHFDRTAIL\*

>Volca1\_109854\_estExt\_fgenesh4\_kg.C\_320006  
MQTSAPTGRSVYPAAQRQARAGRPLVTSRATATMEPSTAPAVPSATQFLRKHMLKLAPYTPIEPFVVL  
SSRYGRKPEDIKLDANENPYGPPPEVRQALGSMSPHYPDPETRALRQALSKMHNIPMENLLVGCAD  
ELIDLLMRCVLEPGDKIVDCPPTFTMYVFDADVNDARVVTVPRLLEGFRLDVEGIRRAVLEHQPKVVFVLS  
PNNPDGSMISESDDLAILDLPLVVLDEAYIEFSTEASRMHWVTERHNLVLRFTFSKSAALAGLRVGYGA  
FPSAMIEYLWRAKQPYNVSVAAEVAACAALTNMEYLDKVRNALVSRDRLFSRLKEIPFLEPYPSHANFI  
LAKVTGGRDAKAIKDALASQYGIMVRHYAKKELSGYIRVSVGRPEHTDKLIEALKQL

>Volca1\_81843\_estExt\_Genewise1Plus.C\_300007  
MCPVHVRRPEFDVGRSLLAGVLNVNRNENFGKLRAGLYLPEIARRRKAHQEKHPDAKIISLIGDITTEPL  
PKYIADAMARAAAAGLATREGYSGYGAEQGGALREAVAATFYSGLRTADEIFISDGSKCDIARIQMMFSG  
KPTVAVQDPSYPVYVDTSVMMGMTGDHNGTGFDGIEYMCNPDNAFFPDLKVKRDTIIFCSPNNPTGA  
AATRAQLTEL VNFARRNGSILVYDAAALYISNPDCKPTIYEIPGAEEVAIETCSFSKYAGFTGVRLGWT  
VVPKALKYSDGTVPVHNDWNRVMTTCFNGASNIVQAGGLACLQPEGLKEMYDMITFYKENARILKDTFTEM  
GFKVYGGNDAPYIWWGFPKPSWDVFAILERCNIVTTPGSGFGPAGEFVVRASAFGSRENILEAVRRFK  
EAYGNK\*

## **TPL-TPRs**

>AT2G33340  
MNCAISGEVPEVSTKSGLLFERRLIERHISDYGKCPVTGEPLTIDDIVPIKTGEIHK  
PKTLHTASIPGLLGTQNEWDGLMLSNFALEQQLHTARQELSHALYQHDSACRVIARLKK  
ERDEARQLLAEVERHIPAAPEAVTANAALNKGKRAAVDEELGPDACKLCPGISAEIITEL  
TDCNAALSQKRKRKQIPQTLASIDTLERFTQLSSHPLHKTNKGICSMIDILHSDVIATG  
GVDATAVSLDRPSGKSTLTLGHSSKVTSVKFGVSDSLVLTASADKTVRIWRNPGDGNYA  
CGYTLNDHSAEVRAVTVHPTNKYFVSASLDGTWCFYDLSSGSLAQVSDSKNVDYTAA



FHPDGLILGTGTSQS VVKIWDVKSQANVAKFDGHTGEVTAISFSENGYFLATAAEDGVRL  
WDLRKLRFNFKSFLSADANSVEFDPSGYSYLGIAASDIKVYQTASVKA EWNLIKTLPLDLSGT  
GKATCVKFGSDAQYVAVGSMRNLRFGLPGDEKANVDDDSAQDS-

>TPL\_AT1G15750

MXMSSLSREL VFLILQFLDEEKFKETVHKLEQESGFFFNMKYFEDEVHNGNWDEVEKYLSGFTKVDDNRY  
SMKIFFEIRKQKYLEALDKHDRPKAVDILVKDLKVFSTFNEELFKEITQLLTLENFRENEQLSKYGDTS  
ARAIMLVELKKLIEANPLFRDKLQFPPLRNSRLRTLINQSLNWQHQLCKNPRPNPDIKTLFVDHSCGPPN  
GARAPSPVNNPLGGIPKAGGFPPLGAHGPFQPTASPVPTLAGWMSPPSSVPHPAVSAGAIALGGPSIP  
AALKHPRTPPTNASLDYPSADSEHVSKRTRPMGISDEVN LGVNMLPMSFSGQAHHGSPAFKAPDDLPKTV  
ARTLSQGSPPMSDFHPIKQTL LLLVGTNVGDIGLWEVGSRERLVQKTFKVVWDL SKCSMPLQAALVKEPVV  
SVNRVIWSPDGLSFGVAYSRHIVQLYSYHGGEDMRQHLEIDAHVGGVNDISFSTPNKQLCVITCGDDKTI  
KVWDAATGVKRHTFEGHEAPVYSVCPHYKENIQIFSTALDGKIKAWLYDNMGSRVYDAPGRWCTTMAV  
SADGTRLFSCGTSKDGESFIVEWNESEGA VKRTYQGFHKRSLGVVQFDTKNRYLAAGDDFSIKFWDMDA  
VQLLTAIDGDGGLQASPRIRFNKEGSLLA VSGNENVIKIMANS DGLRLLHTFENISSESSKPAINSIAAA  
AAAAATSAGHADRANVVS IQGMNGDSRN MVDVKPVITEESNDKSKIWKLETVSEPSQCRSLRLENLRV  
AKISRLIFTNSGNAILALASNAIHLWKWQRNERNATGKATASLPPQWQPASGILMTNDVAETNPEEA V  
PCFALSKNDSYVMSASGGKISLFNMMTFKTMTATFMPPPAA TFLAFHPQDNIIAIGMDDSTIQIYNVRV  
DEVKSKLKGHSKRITGLAFSNVNLV VSSGADAQLCVWNTDGWEKQRSKVLPLPQGRPNAPS DTRVQFH  
QDQAHFLV VHETTLAIYETTKLECMKQWAVRESLAPITHATFSCDSQLVYAFMDATVCVSSANLRLRC  
RVNPSAYLPASLSNSNVHPLVIAAHPQEPNMFVGLSDGGVHIFEPLESEGKVGVA PPAENGSSASGAPTA  
PSVGASASDQQR-

>TPR1\_AT1G80490.2

MXMSSLSREL VFLILQFLDEEKFKETVHKLEQESGFFFNMKYFEDEVHNGNWDEVEKYLSGFTKVDDNRY  
SMKIFFEIRKQKYLEALDRHDPKAVDILVKDLKVFSTFNEELFKEITQLLTLENFRENEQLSKYGDTS  
ARAIMLVELKKLIEANPLFRDKLQFPPLRNSRLRTLINQSLNWQHQLCKNPRPNPDIKTLFVDHSCRLPN  
DARAPSPVNNPLGSLPKAEGFPPLGAHGPFQPTSPVPTLAGWMSPPSSVPHPAVSGGPIALGAPSIQ  
AALKHPRTPPNSAVDYPSGSDHVS KRTRPMGISDEVSLGVNMLPMTFPGQAHHGNQTFKAPDDLPKTV  
ARTLSQGSPPMSDFHPIKQTL LLLVGTNVGDIGLWEVGSRERLVQKTFKVVWDL SKCSMPLQAALVKEPVV  
SVNRVIWSPDGLSFGVAYSRHIVQLYSYHGGEDMRQHLEIDAHVGGVNDIAFSTPNKQLCVITCGDDKTI  
KVWDAATGVKRYTFEGHEAPVYSICPHYKENIQIFSTALDGKIKAWLYDNMGSRVYDAPGRWCTTMAV  
SADGTRLFSCGTSKDGESFIVEWNESEGA VKRTYQGFHKRSLGVVQFDTKNRYLAAGDDFSIKFWDMDT  
IQLLTAIDADGGLQASPRIRFNKEGSLLA V SANDMIKVMANS DGLRLLHTVENLSSESSKPAINSIPMV  
ERPASVVSIPGMNGDSRN MVDVKPVITEESNDKSKVWKLTEVGEPSQCRSLRLENMRVTKISRLIFNS  
GNAILALASNAIHLWKWQRNDRNATGKATASLPPQWQPASGILMTNDVAETNPEEA VPCFALSKNDSY  
VMSASGGKISLFNMMTFKTMTATFMPPPAA TFLAFHPQDNIIAIGMDDSTIQIYNVRVDEVKSKLKGHS  
KRITGLAFSNVNLV VSSGADAQLCVWNTDGWEKQKSKVLQIPQGRSTSSLS DTRVQFHQDQVHFLVHE  
TQLAIYETTKLECMKQWPVRESA APITHATFSCDSQLIYTSFMDATICVFSSANLRLRCRVNPSAYLPAS  
LSNSNVHPLVIAAHPQESNMFVGLSDGGVHIFEPLESEGKVGVA PPAENGSSASAVTATPSVGASASDQ  
QR-

>TPR4\_AT3G15880.2

MXMSSLSREL VFLILQFLDEEKFKD TVHRLEKESGFFFNMR YFEDSVTAGEWDDVEKYLSGFTKVDDNRY  
SMKIFFEIRKQKYLEALDKKDHAKAVDILVKELKVFSTFNEELFKEITMLLTLENFRENEQLSKYGDTS  
ARGIMLGELKKLIEANPLFRDKLQFPPLKNSRLRTLINQSLNWQHQLCKNPRPNPDIKTLFVDHSCGHPN  
GAHTPSPTTNHLMGSPKVGFPPLGAHGPFQPTAPLTTSLAGWMPNPSVQHPTVSAGPIGLGAPNSAV  
SMLKRERPRSPPTNSLMDYQTADSESVLKRPRPFGISDVNNLPVNVLPVITYPGQSHAHATYSTDDLK  
NVSRILSQGSAIKSMDHFPVQQTMLLVGTNLGDIAIWEVGSREKLVSRFSKVVWDLATCTVNLQASLASEY  
TAAVNRV VVWSPDGLSFGVAYSKHIVHIYSYHGGEDLRNHLEIDAHAGNVNDLAFSQPNQQLCVITCGEDK  
TIKVWDAVTVGNKLTTFEGHEAPVYSVCPHQKENIQIFSTAVDGKIKAWLYDNMGSRVYDAPGRSCTSM  
AYCADGTRLFSCGTSKEGESFIVEWNESEGA VKRTYGLGKRSVGVVQFDTMKNKFLVAGDEFQVKFWD  
DSVDLLSSTA AEGGLPSSPCLRINKEGTLAVSTTDNGIKILANAEGSRILHSMANRGLDSSRAPPGSVA  
KGPVGTFTGTPNSMSLSMGERSGPVASVTGLNGDNRS LDPVKPRIADDAEKS KTWKLEISERSQLR  
TLRLPDTLLPARVVVKLIYTNSSGAILALAEAAHKLWKWQKSERNLGKANSNVPPQLWQPSGGVLMTND  
TREGNKEDV VPCFALSKNDSYVMSASGGKISLFNMMTFKTMTTTFMAPPAA TSLAFHPQDNIIAIGMDD  
SSIQIYNVRVDEVKSKLKGHQKRV TGLAFSNVNLV VSSGADSQLCVWMDGWEKQASKQIQIPSGHSPN  
PLAHTRVQFHQDQIHLV VVHASQLAIYEAPKLENMKQWIPKESGVS VDAVYSCDSQSIYAAFDDGVS I  
LTATTLQLKCRIGPNSYLPNSPSSRVYPATVA AHPSEPQFAVGLTDGGVHVIIEPPGPEGK WGISAPPEN  
GAGPSVSSAPGSDQPPSDS-

>TPR2\_AT3G16830.1

MXMSSLSREL VFLILQFLDEEKFKESVHKLEQESGFFFNK YFEKALAGEWDEVEKYLSGFTKVDDNRY  
SMKIFFEIRKQKYLEALDRNDRAKAVEILAKDLKVFATFNEELYKEITQLLTLENFRENEQLSKYGDTS  
ARSIMYTELKKLIEANPLFREKLAFPSFKASRLRTLINQSLNWQHQLCKNPRPNPDIKTLFLDHSCSPSN  
GARALTPVNLPAVA VARPSNFVPLGVHGGPFQSNPAPAPNANALAGWMANPNPSSSVPSGVVAASPFPMQ  
PSQVNELKHPRAPNSLGLMDYQSADHEQLMKRLRSAQTSNEVYPAHSHPPASLDDLPRNVVSTIRQS  
VVISMDFHPSHHTLLAVGCSSGEVTLWEVGSREKVVTEPFKIWNMAACSVIFQGSIVKEPSISVTRVAWS  
PDGNLLGV SFTKHLIHVYAYQGS DLRQHLEIDAHVGCVNDLAF AHPNKQMCVVTCGDDKLIKVWDL SGKK  
LTFTEGHEAPVYSICPHYKENIQIFSTALDGKIKAWLYDNVGSRVYDAPGQWCTTMLYSADGSR LFS  
GTSKEGDSLFVWNESEKALRRTYLGFRKKSAGVYQFDTRNRFLAVGEDNQIKFVWMDNNTLLTVVEAE  
GGLPNLPRLRFNKDGNLLAVTTADNGFKILANTDGLRTRAFEARSEASKASIDMKVSTSAMASSISPA  
IGKIEHMDAGSPARPTPIPNGIEAMSRTEKPRNLDSV DKS KPLEL TEIVDPTQCRQVTMPDSKDSVSKV  
ARLLYTNSSGVV LALGNSGVQRLWKWIRNEQNPTGKATASVTPQHWQPN SGLLMANDV PENPEGSVPCIA  
LSKNDSYVMSACGGKVS LFNMMTFKVM TTFMPPPPASTFLAFHPQDNIIAIGMEDSSIHIYNVRVDEVK

TKLKGHQHITGLAFSTALNILVSSGADAQLFFWTADSWEKKSSAIQLPPGKAPVGDTRVQFHNDQIQL  
LVSHETQLAIYDASKMECIHKWVPQEALSSPITSASYSNSQLVYASFADGNIAVFDAESLRLRCRIAPS  
AYMPQPTPNSAPIFQVITAHQPENQLAVGLSDGSVKVIEPSELSRRWGVGVAAGSDKAGTENGRPSSS  
SAANSSSDQIQR-

>TPR3\_AT5G27030.1

MXMSSLSREL VFLILQFLDEEKFKE SVHRLEKESGFFNTKYFDEKVLAGEWDDVETYLSGFTKVDDNRY  
SMKIFFEIRKQKYLEALDRQEAKAVEILVQDLRVFSTFNEELYKEITQLLTLQNFRENEQLSKYGDTKT  
ARGIMLGELKKLIEANPLFRDKLMFPTLRSSRLR TLINQSLNWQHQLCKNPRPNPDIKTLFDHTCTLPN  
GPLAPSAVNQPVTTLTKPAA YPSLGPVFPFPGPAAANAGALASWMAAASGASAVQA AVVTPALMPQPQN  
QMSILKRPRTPPATPGIVDYQNPDELHMKRLR PAPSVEEVYYPAPRQQAPWSLEDLPTKAALALHQGSTV  
TSMFYPMQNTLLL VGSATGEITLWELAAERLVS RPFKIWDMSNCSHQFQALIAKETPISVTRVAWSPD  
GNFIGVAFTKHLIQLYAFSGPNDLRQHTEIDAHVGVNDLAFANPNRQLCVITCGDDKLIKVWDVSGRKH  
FTFEGHDAPVYSICPHYKENIQFIFSTAIDGKIKAWLYDNLGSRVDYDAPGKWCTRMLYSADGTRLFSCG  
TSKDGD SFLVEWNESEGSIKRTYKEFQKLAGV VQFDTSKNHFLAVGEDGQIKFWDMMNNINVLSTDAEG  
GLPALPHLRFNKDG NLLAVTTADNGFKILANPAGFRSLRAMETPASETMRTPVDFKAVPGAPVASVNCV  
ERGSPPVRHSQMLNGVDP SKSRIDDSTDKPKSWQLAEILDPSQCFQATLPDTAGSSTKV VQLLYTNSGAGI  
LALGNSGIQRLWKWV PNEQNPSGKATATVVPQHWPNSGLMTNDVSGVNLENAAPCIALSKNDSYVMSA  
AGGKVS LFNMMTFKVM TTFMPPPPASTFLAFHPQDNNVIAIGMEDSTIHIYNVRVDEVKSKLKGHQKRIT  
GLAFSTALNILVSSGADAQICFWSIDTWEKRKSVAIQMPAGKAANGDTRVQFHVDQLRILVVHETQLAVF  
DASKMECIRLQWIPQDLSAPISSAVYACNSQLIYTTFRDGNIGVFDADSLRLRCRISPSAYLPQGNQGLS  
PLVVA AHPQDPNQFAVGLNDGSVKMMPEPTGEGK WGMIPPSEAINSPSTTSNTPEQLQR-

>Phypa1\_1\_150439\_e\_gw1.316.3.1

MSSLSREL VFLILQFLDEEKFKE TVHKLEQESGFFNMKYFEDQVQGGEWEEVERYLSGFTKVDDNRYSM  
KIFFEIRKQKYLEALDKQDRAKAVDILVKDLKV FSSFNEELYKEITQLLTLENFRENEQLSKYGDTKSAR  
NIMLLELKKLIEANPLFRDKLAFPSLKASRLR TLINQSLNWQHQLCKNPRPNPDIKTLFDHTCGPPNGA  
RAPPANNPLVGGIPKQGAFLGTHSPFPAPPSSALAGWMANPNPPAPHAPVANGPAALTAPPNSAAL  
LKRPRTPPSTTPTVDYQ SADSEHLMKRARP GVQSVDEVFVPGGTSHPQNNVSPDDLPKSVARSLNQGSCV  
MSMDFHPIQSVLLVGTNVGDIGIWEVGSREKLAQRTFKVWDITAASMPMQAALVKDPAVSVNRTVWNPD  
GTLLGVAFSKHIVHIYAYNGGSDLRQHLEIDAHVGGVNDLAFSHPNKQLCVITCGDDKTIK VWDAAATGRK  
QYTFEGHEAPVYSVCPHHKESI QFIFSTAIDGKIKAWLYDLLGSRVDYDAPGHWCCTMAY SADGTRLFSC  
GTSKDGESYLVEWNESEGAIKRTYSGFRKR SAGV VQFDTTNRNRF LAAGDEFLIKFWMDMNTNLLTTIDAE  
GGLPASPR LRFNKDGSLLAVTTSDNGIKILANRDGMQMLRALEARA YDTNRVPPEPAVSKSGMEGGRTPE  
TKPRIPDEIPDRSKSWKLT EITEQNQCRTIRLPDSL PPNKVARLIYTNAGVALLALASNAVHKLWKWQRN  
ERNINGKATASVSPQLWQPASGILMTNDISETNPEDA VPICALSKNDSYVMSASGGKVS LFNMMTFKVM T  
FMPPPPAATFLAFHPQDNNVIAIGMEDSTIHIYNVRVDEVKSKLKGHQKRITGLAFSNTLNLVSSGAD  
AQLCMWGTGDEWEKRKS KVFVQVQPGGRSPSMGDTRVQFHNDQV RLLVVHESQLAVYEA AKLDRLRQWVPQN  
PPFAAISNATYSCDSQLIYAGFV DGSVGVFDAESLRPRCRLAPSVHIPPGVSGSTVYPLVIAAHPAEPNQ  
FALGLSDGGVQVIEPLESEGK WGTGPPADNGTASGVSPGASGNQGS DQTPR\*

>Phypa1\_1\_234967\_estExt\_fgenes2\_pm.C\_990019

MSSLSREL VFLILQFLDEEKFKE TVHKLEQESGFFNMKYFEDQVQSGEWEEVERYLSGFTKVDDNRYSM  
KIFFEIRKQKYLEALDKQDRAKAVDILVKDLKV FSSFNEELYKEITQLLTLENFRENEQLSKYGDTKSAR  
NIMLLELKKLIEANPLFRDKLAFPSLKASRLR TLINQSLNWQHQLCKNPRPNPDIKTLFDHTCGPPNGA  
RAPPPTNNPLV GGLPKQGAFFPLTTHSPFPAPPSSALAGWMANPNPPAPHAPVANGPAALTAPPNSAAL  
LLKRPRTPPSTTPTVDYQ SADSEHLMKRARPGIQSVDEAKTVNCVGP SHPQNNVSPDDLKPNVARSLNQG  
SCVMSMDFHPIQLSILLVGTNVGDIGIWEVGSRDRLA QRTFKVWDITAASMPMQAALVKDPAVSVNRTVW  
NPDGTLLGVAFSKHIVHIYAYNGGSDLRQHLEIDAHVGGVNDLAFSHPNKQLCVITCGDDKTIK VWDAAAT  
GRKQYTFEGHEAPVYSVCPHHKESI QFIFSTAIDGKIKAWLYDLLGSRVDYDAPGHWCCTMAY SADGTRL  
FSCGTSKDGESYLVEWNESEGAIKRTYSGFRKR SSGV VQFDTTNRNRF LAAGDEFLIKFWMDMNTNLLTTI  
DAEGGLPASPR LRFNKDGSLLAVTTSDNGIKILANRDGMQMLRALEARA YDTNRAPPEPAVSKPPVGNL  
GKVSTPGGGGQDRPNSSSMAGSVM DGP TLNMGGSRVPRDRV GNDHSGMEGGRTPETKPRIPDDIPDRSK  
SWKLT EITEQNQCRTIRLPDSL PPNKVARLIYTNAGVALLALASNAVHKLWKWQRNERNVSGKATASVTP  
QLWQPASGILMTNDISETNPEDA VPICALSKNDSYVMSASGGKVS LFNMMTFKVM TTFMPPPPAATFLAF  
HPQDNNVIAIGMEDSTIHIYNVRVDEVKSKLKGHQKRITGLAFSNTLNLVSSGADAQ LCMWGTGDEWEK  
KSKFVQVQPGGRSPSIGDTRVQFHNDQV RLLVVHESQLAVYDASKLDRLRQWVPQNPPFAAISNATYSCD  
SQLIYAGFV DGSVGVFDAESLRPRCRLAPT VHVPSVSGSTVYPLVIAAHPAEPNQFALGLSDGGVQVIE  
PLESEGK WGTGPPADNGTASGVSPGASGNQGS DQTPR\*

>Selmo1\_163891\_estExt\_Genewise1Plus.C\_01032

MSSLSREL VFLILQFLDEEKFKE TVHKLEQESGFYFMKYFEDQVQNGEWEEVERYLSGFTKVDDNRYSM  
KIFFEIRKQKYLEALDKQDRARAVEILVKDLKV FASFNEELYKEITQLLTLENFRENEQLSKYGDTKSAR  
NIMLLELKKLIEANPLFREKLQFPGLKASRLR TLINQSLNWQHQLCKNPRPNPDIKTLFDHTCGAPNGA  
RAPPANSPLV GSLPKGAGFPPLGAHSPFQAAAPTASALAGWMANPNPPSHPGV VGGPAALAGAPNPAAM  
LKRPRTPPPAPTVD FQTADSEHLMKRNRPVGRDES DSNLFVSDLQLQVNFPGPNIQQASYTIDDIPKTV  
RTINQGS CVATLDFHPLQVILLVGTNVGELAIWVDA TRERLALKTFKVWEVSVCSMPLQ TALVKDPAVA  
VTRVWVSPDGNFIGVAFNKHIVQVYQYFGGVELRQQVEIDAHVGSVNDLAF AHPNKQLCIISCGDDKTIK  
VWDAVSGRNKYTFEGHEAPVYSVCPHHKENIQFIFSTAMDGKIKAWLYDCLGSRVDYDAPGSWCTMAY S  
ADGTRLFSCGTSKEGDSFLVEWNESEGVIKRTYIGFRKRMPNVVQFDTTNRNCF LAVGDEFVSKFWDMDNI  
NLLTSDALFSGGKSRIFRNKEG SLLAVTTIDNGFKILANADGLRLLRSFEGNKVPPETKGNVASAGS  
GVDRPV SQVPPTGGNGIENGRPETKPRTTDDSNKLWKL TEIVEPSHCRALKLPDTLPASKISR LIFTNN  
GLGLLALASSAVHKVWKWSRNPLGKATASFPPLQFQPSGILMTNDTTENNPEEAVPCIALSKNDSYVMS  
ASGGKVS LFNMMTFKVM TAFMPPPPAATFLAFHPQDNNVIAIGMEDSTIHIYNVRVDEVKSKLKGHQKRI  
TGLAFSNTLNLVSSGADDQLCVWGTGDEWEKRKS KFLQTPPVKGT PATGDTKVQFHNDHTRLLVVHETQL

AIYDAAKLERLSQWVPKDNFPAISSGTYS CDSRLVYAAFLDGAIGVFEAETLRPYCRIAPT VYLPQGV TGAHPLVVA AHPSEPNL FALGLTDG SVQVLEPLESEAKWGVAPPAENGSAMVTTSGPPTG SVQVSDQASR\*

>Selmo1\_439915\_estExt\_fgenes h2\_pg.C\_80440

MSSLSREL VFLILQFLDEEKFKETVHKLEQESGFYFNMKYFEDQVQNGEWDEVER YLSGFTKVDDNRYSM KIFFEIRKQKYLEALDRQDRARAVEILVKDLKVFASFNEDLYKEITQLLTLENFRENEQLSKYGDTKSAR NIMLELKLKLIANPLFREKLQFPGLKASRLRTLINQSLNWQHQLCKNRPNPDIKTLFVDHTCGAPNGA RAPPANSPLVGSPLKAGFPPLGAHSPFQPAAPTASALAGWMANPNPPSHPGVVGGAALAGAPNPAAM LKRPRTPPPAPTVD FQTADSEHLMKRNRPVGOHVEEVNFPGPNIQQASYTIDDIPKTVARTINQGS CVAT MDFHPLQQVILLVGTNVGEIAIWDVATRERLALKTFFKVV E VSVCSMPLQTALVKDPAVA VTRVVWSPDGN FIGVAFNKHIVQVYQYFGGVELRQQVEIDAHVGSVNDLAFAPHNKQLCIISCGDDKTIK VWDV A VSGRNKY TFEHGHEAPVYSVCPHHKENIQFIFSTAMDGKIKAWLYDCLGSRVDYDAPGSWCTTMAYSADGTRLFSCGT SKEGDSFLVEWNESEGVIKRTYIGFRKRMPNVVQFDTRNCFLAVGDEFVSKFWDMDNINLLTSIDADGG LPASPRIRFNKEGSLLA VTTIDNGFKILANADGLRLLRSFEGNKVPPETKGNVASASGSGVV AIDRPV SQ PVPFTGGNGIENGRPETKPRTTDDSNLWKLTEIVEPSHCRALKLPD TLPASKISRLIFTNNGLLG LALA SSAVHKVWKWSRNLGKATASFPQLFQPSGILMTNDTTENNPEEA VPCIALSKNDSYVMSASGGK VSL FNMMTFKVMTAFMPPPPAATFLAFHPQDNNIIAIGMEDSTIQIYNVRVDEVKSKLKGHQKRITGLAFSNV LHVLVSSGADDQLCVWGTDGW EKRKSKFLQTPPVKGPATGDTKVQFHNDHTRLLVVHETQLAIYDAAKL ERLSQWVPKDNFPAISSGTYS CDSRLVYAAFLDGAIGVFEAETLRPYCRIAPT VYLPQGV TGAHPLVVA AHPSEPNL FALGLTDG SVQVLEPLESEAKWGVAPPAENGSAMVTTSGPPTG SVQVSDQASR\*

>Selmo1\_88677\_e\_gw1.9.632.1

MSSLSREL VFLILQFLDEEKFKETVHKLEQESGFFNMKYFEDQVQNGEWDEVER YLSGFTKVDDNRYSM KIFFEIRKQKYLEALDKQERAKAVEILVKDLKVFASFNEDLYKEITQLLTLDNFRENDQLSKYGDTKSAR NIMLIELKKLIEANPLFREKLQFPGLKASRLRTLINQSLNWQHQLCKNRPNPDIKTLFIDHSCGPPNGA RAPPANNPLVGAMQKTA AAFPPLGAHGPFQPSAGPPASALAGWMGNANSAAPHA AVAPGQALPGPPNPAAL LKRPRTPPANSTIDYQSADSEHILKRPRPQADEVNYAGASHQRNATLDDL PKTHARTLNQTSSVTSMDF HPMHQTVLLVGTNIGEISIWEVASREKLAYRTFKVWDISACSVTMQTA FVKDPAVLVHRVVWSPDGALIG VAFSKFIHLHYMNGTSLRQLHEIDAHVGGVNDLAFSPHNKQLCVITCGDDKTIK VWEAMTARKIYVFE GHEAAVYSVCPHHKESIQFIFSTALDGKIKAWLYDNLGSRVDYDAPGRWCTTMAYSADGTRLFSCGTSKD GESFLVEWNESEGAIKNTYNGFRKRSINVIQFDTRNRFLAAGDDFSIKIWDMDNINLLTTIDADSGLPP SPRLRFNKEGTLLAVTTQDINSIRILANNDGLRLLNRAIEKVNVEKPAVNTLAAVSGVTAPVVA VDRNGAE NSRAVEVKPRADEGDKKNWKLADLTEQAHCRSIRLGDQMAASKVLRLIYTNAGNALLALGSA NIAHLWK WQKNDWNVAGKATANFAPQLWQPQSAGFMTNDVGETDPEEA VPCIALSKNDSYVMSASGGK VLLFNMMT KIMTQFMPPPPAATFLAFHPQDNNFIIAIGMEDSVIHIYNVRVDEVKTKLKGHSKRITGLAFSNLNILV SSGADGQLCVWGTD AWDKRKSKFIQMPGKDATPTGDTRVQFDVDQTRLLIVHETQLAIYDATKLESIHQA TIHDIVSFQWYLRDPPFASVSSATFSCDSELVYAAFDGSGVGFETDGLRPRCRLAPSTYLP PGASGTSV YPLAISAHPTKEYQFALGLSDGGV LVEPLEPDGK WGPIPVTDNGAAASGATGVPPPADQNAEQSGARAS \*

>corb\_UMD\_Coleochaete\_c5086\_c\_s

XPSTGVMKNDTSPDNSPEEASTLXXXXXXXXFLRDVSFGWKDFTFQHVQFQGNH VHASXSSNVPGISPP QDNNIIAIGMEDSTIQIYNVRLDEPKSKLKGHTKRISGLAFSNTQNC LVSSGADAQLFVWATDSWEKRV TQKLVNPSKAQPHVADTRVQFHIDQTHLLVQHESQIAYDGANWGRKSLWPVKEGSPNITCATFSCDSSLV IAGFVDGTACIFDADTLWPRARINPVSYPSPNSGPVYPMVIAAHPQEVNQFAMGLSDGGVQVFEPLESDN KWGSVQSGDNGNHTNNGLGSGPGTSSQGGVELGARXVEGMDSGGLYAXRYLLGMEFLGIPGRIFGGDDQS ATSXMTGCEGXQKSVITCVHNHRANIDSRDFFLENAAGSGDVLSTAKCPQHWELL

>spra\_Contig1095

XSRSQDIKPRISGEDERNKAFKITEITEPLQCQSIRLPDSLPLSRIPRLIYTN SSGSGLLA LASNAVHKLWKWMKNDRNPNGKATAANAPQLWQPSGVMNETSESSNPEEAIPCIALS KNDSYVMSASGGK VSLFNMLTFKVM TTFMPPPTV TFLAFHPQDNNIV AIGMEDFSIQIY NVRLDEVKSKLKGHTKRITGLAFSNLNILVSSGADAQICVWGTD AWDKRKSKFLFTPGS SRASSQTIDTRVQFHNDQMKLLVTHETQLAVYDAAKLERIRQVTPKESGPLSAPLSAATY SCDSQLVFAAFMDGSLCVFDAESLRPRC RIFPSFYLPRELVRN GEGTVYPLVVA AHPQEP NQFALGMSDGGVQILEPLESEKWCNASPSENGLTSSTVPQVSNNGSTLADQSSR

## TSA1

>TSA1\_AT3G54640

MAIAFKSGVFFLQSPKSIQIFRHSSPPDSSLFKRFTPMASLSTSSPTLGLADTFTQLKKQGVAFIPYI TAGDPLDSTTAEALKVLDACGSDIIELGVPYSDPLADGPVIAQAAATRS LERGTNLD SILEMLDKVVPQIS CPISLFTYYNPILKRGLGKFMSSIRAVGVQGLVVPDVPLEETEMLRKEALNNDIELVLLTPTPTTERMK LIVDASEGFYLVSSIGVTGARSSVSGKVQSLLDIKEATDKPVA VGF GISKPEHV KQIAGWGADGVIVG SAMVKLLGDAKSPTEGLKELEKLT KSLKSALL-

>TSB1\_AT5G54810

MAASGTSATFRASVSSAPSSSSQLTHLKS PFKAVKYTPLPSSRSKSSSFSVSC TIAKDPV LMAAGSDPA LWQRPD SFGRFGKFGGKYVPETLMHALSELES AFYALATDDDFQRELAGILKDYVGR ESPLYFAERLTHE YRRENGEGLIYLKREDLNHTGAHKINNAVAQALLAKRLGKKRIIAETGAGQHGVATATVCARFGLECHII YMGAQDMERQALNVFRMRLGAEVRGVHSGTATLKDATSEAIRD WVTN VETTHYILG SVAGPHYPMMV R DFHAVIGKETR KQALEKVGKPDV LVACVGGGSNAMGLFHEFVNDTEVRMIGVEAAGFGLDSGKHAATLT KGDVGV LHGAMS YLLQDDDDGQIIEPHSISAGLDYPGVPEHSFFKDMGRAEYYSITDEEALEAFKRVSRL EGIIPALETSHALAYLEKLCPTLSDGTRVVLNFSGRGDKDVQTVAKYLDV-

>AT4G02610  
MDLLKTPSSTVGLSETFARLKSQGKVALIPYITAGDPDLSTTAKALKVLDSGSDIIELG  
VPYSDPLADGPAIQAARRSLLKGTNFNSIISMLKEVIPQLSCPIALFTYYNPILRRGVE  
NYMTVIKNAVHGLLVPDVPLEETETLRNEARKHQIELVLLTTPPTPKERMNAIVEASEG  
FIYLVSSVGTGTRESVNEKVQSLQLQKEATSKPVAVGFVQISKPEHVQVAEWGADGVI  
VGSAMVKILGESEPEQGLKELEFFTKSLKLSALVS-

>Phypa1\_1\_115585\_e\_gw1.13.326.1  
MTRIDTFSTLQKLGKVAFIPYLTAGDPDLDTTAQALRLDDCGADIIELGVPYSDPLADGPVIQACAAA  
TRLSKGTTLKDLVLSMLKEISPSLKAPVVLFYYPILKRGMEPFLKAVKEAGGSGLVVPDIPLEETDKL  
RERSVANGLELILLTPTTPKSRMKIIAKASQGFVYLVSLTGVGTGARTSVQSRVETLLKELKEQVTDKPV  
AVGFVQISKPEHAVQVVEWGADGVIIGSAMVKILGEAASPKEGLAELEKFTKDLKNSIS\*

>Selmo1\_270960\_estExt\_fgenesh1\_kg.C\_190012  
MAALQGAHSVGMSSAPFIRSSGRARVFAVAAVGTPVVTGKGVSAKFAQLRELKIALIPYITAGDPNLE  
TTADALKLLDARGADIIELGVPYSDPLADGPVIQAAATKALRNGTTLENVLSMVHEVAPTLAPLVLFTY  
FNPILKRGIDNFVASIKEAGVSGLVVPDVPLEETQALREKTAQAQDIELVLLTPTTPRERMEEIAKSSQG  
FVYLVSLTGVGTGARASLSIRVEELLKDLKQVTTKPIAVGFVSTPEQAAQIAKWGADGVIIGSAMVKLLG  
ESSSPKEGLAKLGAFISEMRSVL\*

>Volca1\_105923\_estExt\_fgenesh4\_pg.C\_360033  
MNSNPRERSRSLLSARGTQISTRLLQLSASWMRLAQMSLNLECRTRYAGKDPADGPVIQGAATRALEK  
HTTLDRVIEMVRRTPAMKAPLVMFTYFNPIMRKGLDKFKCTIKEAGAGLLVPDLPLEETVAVRAACEA  
AGIELVLLTPTTPQARMRAIAQASQGFVYLVSVTGVTGMKQVRESRVEGLVRLQDVTDKPICVGFVGS  
RPDQAKQIVSWGANGVICGSALVKALGEAKSPAEGLOAMEDLARSRAAIP\*

>Chlre3\_81238\_estExt\_GenewiseW\_1.C\_310105  
MNALKAKGKVAFIPFICAGDPDLDTTSLALRKLDEVGADVIELGVPYSDPLADGPVIQGAATRALDKHTT  
LDKVIEMVRRTPAMKAPLVMFTYFNPIMRKGLDNFARTIKEAGAAGLLVPDLPLEETVSVRAACEKAGI  
ELVLLATPTTPQARMRAIAQASQGFVYLVSVTGVTGMKEQVSGRVEGLVSELKAVTDKPVCGVGFVSRAE  
HAKQIVSWGADGVICGSALVKALGEASSPAEGLQAMEKLARELRAATP\*

>Chlvu1\_72235\_fgeneshCV\_pg.C\_scaffold\_4000337  
MAVDTTSSVGRMAELREQKRGAFIPFITAGDPDIETTEQALLALDRAGADIIELGVPYSDPLADGPTIQA  
ASTRALASGTTLLKVIDVVGKVSHPITAPIVLFYYPNIMRRGPEKFCQEIKAAAGAAGLLVPDIPLEETG  
PIREVALAAGLELVLLTPTTPQARMRAIAQASQGFVYLVSVTGVTGQVSMESRVEGLIEQLHQITDKS  
VAVGFVSGPEQARQIMAWGSEGVIVGSALVKALGEAPSAKEGLERMEALARSIREAI\*

>ChINC64A\_1\_48138\_fgenesh3\_kg.C\_scaffold\_4000006  
MAASTETKSVSGTMAELKQKGVAFIPFLVACDPDAATTVKALQKLDDELGADVIEMGFPYSDPLADGPTI  
QAAATRALQKGTMDKVLVDVVRQASATIRAPIVMFTYYPNIMARGLDKFCRQAKEAGAGLLVPDIPLEE  
TPEIRAVASQHGLELVLLTPTTPQARMRAIAESSQGFVYLVSLTGVGTGMRGSMESRVEGLIKQLQSVTD  
KSCVCGVGFVSGPEQAQQIKAWGAEGVICGSALVKALGESGSPDEGLKRMAELASSLRAVI\*

>MicpuN2\_79000\_e\_gw2.02.600.1  
MAVKTKTLSPKTFEELKRRGQCAFIPFICAGDGGIDTTEKAVRILDEVGSDVIELGVPYSDPLADGPTI  
QAAATRALEAGTTLDQVIDLVARVTPDISAPIVLFYYPNIPYQRFEPFVKIAAAGAKGLLVPDIPLEE  
TGELSAVCKANGLDLVLLSTPTTPDRMAKIAEKSNGFYLVSVTGVTGVRSGVESRVEGLVKSLKSVTD  
KPVAVGFVQISKREQAEEVVKWGADGVIIGSAMVKALGEAKTPEAGLAALKELAVELREGSNREGAKPKGS  
GGGFFARLMGKA\*

>Ost9901\_3\_49484\_estExt\_Genewise\_ext.C\_Chr\_40617  
MAASASRALRAAPRAPRASRARRNPERGAASRAVATRASVSEAFKAVLDDGKRAFIPFICAGDPDLESTK  
KALKILDDAGADVIELGVPYSDPLADGPVIQAAATRALENGATLNKVIDLVREMTQIKAPIVMFTYYPN  
IYQRGVDKFCADIAAAGAKGLLVPDIPLEETYDVSEIASKHGIELVLLSTPTTPVERAKKIAQATKGFVY  
LVSVTGVTGVQSNVATRVEQLVEELRSVTDKPIAVGFVSEAKHAKQIVDWGADGVIIGSAMVRLALGEAK  
TPEEGLAALKAKAEIRGGATL\*

>Ostta4\_16569\_e\_gw1.04.00.381.1  
MTTRSSATKSVSEQFAGVLRENKRAFIPFICAGDPDLESTKALKILDGADADIIELGVPYSDPLADGPV  
IQAAATRALEAGATLDKVIKEMSPQIKAPIVMFTYFNPYQRFVEKFCADIAAAGAKGLLVPDIPLE  
ETYSMSEIASHGIELVLLSTPTTPVERAKKIAQATKGFVYLVSVTGVTGVQTVASRVESLVEELRAVT  
DKPIAVGFVSGVQAAQAKQIVDWGADGVIIGSAMVRLALGEAKTPEEGLAALKAKADEIRSGAKL\*

>MicpuC2\_35499\_estExt\_Genewise1Plus.C\_110076  
MIPRATATTTSTKRPVKTVSIGATFAALKKRGQCAFIPFICAGDPNLDATERAIAILDDEGADVIELG  
VPYSDPLADGPTIAQAATRALNAGTTLDKTLALLARVSPPTKAPIVLFYYPNIPYQRFVEAFVEAVAAAG  
AKGLLVPDIPLEETPELSAICAKNGVDLVLLSTPTTPPEARMTKIAEASNGFIYLVSVTGVTGVRTNVESR  
VQELVSGLKKVTDKPVAVGFVQISKKEQAQVVGWADGVIIGSAMVRLALGEAPTPEEGLERLTLAKELR  
EGSNREGAKPAGKSGGASFFDRIMGKA\*

## **TSBs**

>TSA1\_AT3G54640  
MAIAFKSGVFFLQSPKSIQIFRHSPPDSSLFKRFTPMASLSTSSPTLGLADTFTQLKKQKGVAFIPYI  
TAGDPDLSTTAEALKVLDACGSDIIEELGVPYSDPLADGPVIAQAATRSLERGTNLDSEMLDKVVPQIS  
CPISLFTYVNPILKRGLGKFMSSIRAVGVQGLVVPDVPLEETEMLRKEALNNDIELVLLTPTPTTERMK  
LIVDASEGFIYLVSSIGVTGARSSVSGKVQSLLDIKEATDKPVAVGFGISKPEHVKQIAGWGADGVIVG  
SAMVKLLGDAKSPTEGLKELEKLTSLKLSALL-

>TSB1\_AT5G54810  
MAASGTSATFRASVSSAPSSSSQLTHLKSPFKAVKYTPLPSSRSKSSSFSVSCTIAKDPVLMAGSDPA  
LWQRPDSFGRFGKFGGKYVPETLMHALSELESFYALATDDDFQRELKDYVGRESPLYFAERLTHE  
YRRENGEGLIYLKREDLNHTGAHKINNAVAQALLAKRLGKKRIIAETGAGQHGVATATVCARFGLCEII  
YMGQDMERQALNVFRMRLGAEVRGVHSGTATLKDATSEAIRDWVTNVETTHYLGSVAGPHYPMMVVR  
DFHAVIGKETRKQALEKWGGKPDVLAACVGGGSNAMGLFHEFVNDTEVRMIGVEAAGFGLDSGKHAATLT  
KGDVGVHLHGAMSYLLQDDDGQIIEPHSISAGLDYPGVGPEHSFFKDMGRAEYYSITDEEALEAFKRVSR  
EGIIPALETSHALAYLEKLCPTLSDGTRVVLNFSGRGDKDVQTVAKYLDV-

>AT1G72810  
MASFSLPHSATYFPHSHSETSLKPHSAASFTVRCTASAPVPPQTPQKPRRSPDENIRDEA  
RRRPHQLQNLRSARYVPFNAPSSSTESYSLDEIVYRSQSGALLDVQHDFAAALKRYDGEFWR  
NLFRSRYGKTNWPGYSGVWSKKEWVLEIDDDDIVSAFEGNSNLFWAERFGKQYLQMNLDL  
WVKHCGISHTGSKFDLGMVSVLVSQVNRRLKMNKPVIGVGCSTGDTAALSAYCASAGIP  
SIVFLPADKISMAQLVQPIANGAFVLSIDTDFDGMHLIREVTAELPIYLANSLNLRLE  
GQKTAIEILQQFNWQVPDWWVIVPGGNLGNIAFYKGFHMCKELGLVDRIPLRVCQAAN  
ANPLYLHYKSGFKEDFNPLKANTTFASAIQIGDPVSDIRAVYALKKSNNGIVEEATEEELM  
DATALADSTGMFICPHTGVALTALMKLRKSGVIGANDRTVVVSTAHLKFTQSKIDYHSK  
NIKEMACRLANPPVKVAKFGSVMDVLEKEYLKSNDK-

>TSB2\_AT4G27070  
MATASTAATFRPSSVSASSELTHLRSPSKLPKFTPLPSARSRSSSSFSVSCTIAKDPVVMADSEKIKAA  
GSDPTMWQRPDSFGRFGKFGGKYVPETLMHALSELETAFYSLATDEDFQRELAELKDYVGRESPLYFAE  
RLTEHYRRENGEGLIYLKREDLNHTGAHKINNAVAQALLAKRLGKKRIIAETGAGQHGVATATVCARFG  
LQCIYMGQDMERQALNVFRMRLGAEVRGVHSGTATLKDATSEAIRDWVTNVETTHYLGSVAGPHYP  
PMMVVRDFHAVIGKETRKQAMEKWGGKPDVLAACVGGGSNAMGLFHEFVDDTEVRMIGVEAAGFGLDSGKH  
AATLTKGDVGVHLHGAMSYLLQDDDGQIIEPHSISAGLDYPGVGPEHSFLKDVGRAEYFSVTDEEALEAFK  
RVSRLGIIPALETSHALAHLEKLCPTLPD GARVVLNFSGRGDKDVQTAIKYLEV-

>Volca1\_109912\_estExt\_fgenesh4\_kg.C\_400002  
MNLHSPRTDAKGRATGRPQTRSKIPRSVRLISRSTVIVSAVAPEKPVTEYQRPDGTGRYGIFGGKYVP  
ETLIPALEQLEVDYKAALADPSYKAEMEAILKDYVGRETPLYHAVRLESEHFATADGGKAEIYLKREDLNH  
TGAHKINNSLQALLCKRLNKKRIIAETGAGQHGVATATICARLGLKCVYMGAKDMERQALNVFRMRLC  
GAEVRPVSGTATLKDATSEAIRDWVTNVETTHYLGSAGPHYPMMVVRDFQSVIGRETRAQCLEKWWG  
KPDIVMACVGGGSNAIGIFHEFVNDTDIRLIGVEAGGEGVNTNKHAATLTRGSPFVHLHGSYSYLLQDEEDG  
QIIDPHSISAGLDYPGIGPEHSFLKDIGRAEYAVTDAEALEGFQLLSRLEGIIPALETSHAIAYLAKLV  
PTLKSGRTRVVINCSGRGDKDVNNAMKYLQI\*

>ChlNC64A\_1\_56342\_estExt\_fgenesh3\_pm.C\_250004  
MPVSCTAAPPQPKVQRPDKTGRYQFGGRYVPETLILALDELTAAYEEAINDPAFQAEHDHLLKHVYVGRE  
SPLYHAERLSERYRRPDGSRPEIYLKREDLNHTGAHKINNSLQALLCKRMGKKRIIAETGAGQHGVATA  
TVCARAGLECVVYMGEKDMERQALNVFRMRLGAEVRPVTSGRTRTLKDATSEAIRDWVTNVETTHYLGS  
VAGPHFPMMVVRDFHACIGRETRRQAQEAWGGKPDILVACVGGGSNAMGLFHEFVDDADVRLIGVEAGGE  
GIDTDKHAATLTLGRPGVHLHGSYSLLIQDEEQVVDPHSISADAEALQAFQDLRLEGIIPALETSHALA  
FLDKLCPTVPDGRTRIVVNCSSGRGDKDVMMNAANYLPHLSGGSTQ\*

>ChlNC64A\_1\_141793\_IGS.gm\_38\_00056  
MPTRWYNLVPDLPMPPPPPLNPAATLLPLVAEDLESIFPRSLIEQEMSLEKYIAIPKEVLEVYKLRPTPL  
YRARRLEKLLDTPARIYKYEGVSPVGSHPNNTAVPQAWYNAQAGVKKLTETGAGQWGASLAFACKLFD  
MEASGVRASYDSKPYRRMLMELWGGTVHPSPTVTQAGRDILAKDPNTPGSLGIAISEAVEVAASDPTAK  
YALGSVLSHVLLHQTVIGEEALQQLAMVGETPDLVIGCTGGGSNFGGLAFPLLEKRMAGNMNPIRAVEP  
EACPSLTRGVYAYDFGDAGLTPLLKMHTLGAQFIPDPIHAGGLRYHGMSPHSVHVKELGLIEAVAVPQV  
DCFKAALQFSQTEGIVPAPEPTHALAEAIKEALKCRETGEGKVILTALCGHLLDLPAYDKFIHGALEDI  
PLPSAKLDAAFASLPSRSSTL\*

>Chlre3\_188307\_estExt\_fgenesh2\_pg.C\_90324  
MNITAPTRLDSPVASARSSARSVAPRVASRKSTVRIAAVAAPERPITDYQRPDANGRYGQFGGKYVPET  
LIPALEQLEKDYNEAIAADPAFKAEMEAILKDYVGRETPLYHAERLSAHYKTADGGHAEIYLKREDLNHTG  
AHKINNSLQALLCKRLNKKRIIAETGAGQHGVATATICARLGLKCVYMGAKDMERQALNVFRMRLCGA  
EVRVHSGTATLKDATSEAIRDWVTNVETTHYLGSAGPHYPMMVVRDFQSVIGRETKVQAQEKWGGPL  
DIVMACVGGGSNAIGIFNEFINDTSVRLIGVEAGGEGVNTTKHAATLTMGTPGVHLHGSYSYLLQDDDGQI  
IDPHSISAGLDYPGIGPEHSFLKDVKRAEYAVTDAEALEGFQLLSKLEGIIPALETSHAIAYLEKLIPT  
LKSGRTRVVINCSGRGDKDVNNAMKYINP\*

>Chlvu1\_44845\_estExt\_Genewise1Plus.C\_180287  
MAIAAEPAVAERPPVAQRPDSDGRFGRFGGKYVPETLIGALKELEEEYAKAMADPEFAAILKDYVGRES  
LYHAERLSERYRRPDGSRPEIYLKREDLNHTGAHKINNSLQALLCLRMKRRRIIAETGAGQHGVATATV  
CAKFGPLCIYMGAKDMERQALNVFRMRLGAEVRPVHSGTATLKDATSEAIRDWVTNVETTHYLGSAA

GPHYPMMVDRFQAVIGRETRRQCQAAFVGGKPDVLLACVGGGSNAIGLFHEFVDEDIRMIGIEAGGEGV  
DTEKHAATLTKGSPGVHLHGSFSYLLQDDEGQIIDPHSISAGLDYPGIGPEHSYKDLGRAEYVAVTDAEA  
LEAFVLSRLEGIIPALETSHAFAYLEKLCPLDPLNGTRVVINLSGRGDKDVNTAAKFLDISGE\*

>Ost9901\_3\_32688\_eugene.0700010285

MTPPTQGKISEQSRPDANGRYGAYGGKYVPETLIPALRALEKEYEAIKTDPAFQAEKDKILKDYVGRENP  
LYYAERLSEHFKDANGEGPDVYLKREDLNHTGAHKINNAVGOALLAKRMGKKRIIAETGAGQHG VATATV  
CARFGLKLECIYMGAAQDMERQKLNVRMRLLGATVPRVAGTATLKDATSEAIRDWVTNVEDTHYLGSVA  
GPHYPMMVDRFHAVIGQETRRQAMEKWGGPLDILVACVGGGSNAMGLFHEFIDDES VRIIGVEAGGEG  
EPGQKHAATLTLGTPGVHLHGSFSYLIQDEEGQIVPHSISAGLDYPGIGPEHAFLKDFGRAEYHAITDKE  
ALDAFVATSRLEGIIPALETSHALAYLWKLCPGLPNGTKVVLNCSGRGDKDVNTAAKFLDISGEVDG\*

>Osta4\_18488\_e\_gw1.07.00.162.1

MGVVDKGRPTAAPGRGATTTTRRAVTPVTPGGDISKEQRPDAAGRYGRYGGKYVPETLIPALAELEREYEAI  
KTDAAFQAEKSVLKD YVGRESPL YHAERLSEAFKADGNGPEVY LKREDLNHTGAHKINNAVGOALLAK  
RMGKKRIIAETGAGQHG VATATV CARFGLKLECIYMGAAQDMERQKLNVRMRLLGATVPRVWAGTATLKDA  
TSEAIRDWVTNVEDTHYLGSVAGPHYPMMVDRFHACIGQETRAQAMEKWGGPLDILVACVGGGSNAMG  
LFHEFINDES VRIIGVEAGGEG IAPGQKHAATLTLGTPGVHLHGSFSYLIQDEEGQIVPHSISAGLDYPG  
IGPEHAFLKDFGRVEYHAITDKEALDAFVNTRLEGIIPALETSHALAYLWKLCPGLPNGTKVVLNCSGR  
GDK

>MicpuN2\_93438\_estExt\_Genewise2Plus.C\_Chrom\_020484

MASAATAPQALSSRVAVRGARAAQARRSAVSIARRNTIVRAVITDPPKPSIKEVQRPDPTGRYGAYGGKY  
VPETLIPALLDLEREY AALASDKEFQAELESILKDYVGRANPLYFAERL TEHYGTADIY LKREDLNHTGA  
HKINNAVGOALLAKMGGKRIIAETGAGQHG VATATV CARFGLKLECIYMGAAQDMERQKLNVRMRLLGAT  
VNPVRSSTLKDATSEAIRDWVTNVEDTHYLGSVAGPHYPMMVDRFHACIGRETRAQAMEKWGGKPD  
ILMACVGGGSNAMGLFHEFVDEEDVRLIGIEAAGEGMGPQKHAATLTLGKPGVHLHGSFSYLIQDEEGQI  
IEPHSISAGLDYPGIGPEHSFLKDFGRAEYHAVTDQEALDAFVRISRTTEGIIPALETSHAFAYLEKLMPT  
LKKGQKVVINCSGRGDKDVNTAAKFLNISGEVDI\*

>MicpuN2\_53147\_est\_orfs.Chrom\_08\_3018\_3201704:1

MGFPPIFGGAKDQGFATFPKPKDERLDPAILPNTDGYFGEYGGAFLLPPLVPIIDEIKAKYNELKEDPSFW  
AELRLLKHFTRPSPILHCERLSEKIGGAQIY LKREDLNHTGAHKINHCLGEALLAKMGGKRIIAETG  
AGQHGVALATAAALVGLECDIYMGEVDMAKERPNVVRMKILGANVIPASHGLKTLKEAVDAAFGAYMEDP  
VTQFYAIGSVVPHPPFAMVRDFQSVVGREAKEQFKELTGGKLPDNLVACVGGGCNAIGLFTAFGLGDEK  
KMFVPEPSGTDLKTGVKHAATLTLGTPGVHGFKCVLLQDEGGEPAAVNTCASGLDYPGVGPQHICYLKI  
GRVKYETATDVCEVD AFMSLARDQGIIPALES SHAVAYAIKLAKTLPKTETILVNLSGRGDKDVYVVEN  
FGAKYGVSPKYEMPKAEEALSAA\*

>MicpuN2\_105162\_estExt\_fgensch2\_pg.C\_Chrom\_020334

MNACVLSIQAKPALRLGSKPVARRARVASVTRAVISDPPPIKSATKFTQDVALQGVPKDDEIAGTFVTH  
LECSLTGEKYKADELHGLADSGKPLLVR YDFQALKGKLTREILASRPPTLWKWREMLPVRKAEDCVTLGE  
WMTPIVDAPKLAEEAGLEEGGALLVKDEGR LPTGSFKARGLVMAVSMAKELGVTRMAMPTNGNAGAAMSA  
YCSRCGIET YIFAPEDTPDNTIREMALQGANVWRVNGYIDDCGKIVGGGKEEMNWFDTSTLKEPYRIEGK  
KTMGLELVEQFGWDDLDPVIMYPTGGGTGLIGMWKAFGELKELGLIKPETKLPKMVA VQATGCAPMVNAY  
DAGEEFATRVDNAFTRSAMGIRVPAAVGDFLILRAVRESGGWAVAVTDDAIDEGQTEFAKKEGFLLCPEG  
AATYA AFKKGLANGKIKKTDRVLLFNATGLKYPMPSSNNDIDRHQPIDYGVIAKGI\*

>MicpuC2\_33061

MRAISAATALTPGATSLRARAKGANPRRVS RVSTTRAAIVDPPKTSIKDVQRPEDETGRFGAYGGKYVPET  
LIPALQELQDEYATLAGDASFQAE LSSILKDYVGRANPLYFAERL TELYGTADIY LKREDLNHTGAHKIN  
NAVGOALLAKRMGKKRIIAETGAGQHG VATATV CARFGLKLECIYMGAAQDMERQKLNVRMRLLGATVTP  
RAGTATLKDATSEAIRDWVTNVEDTHYLGSVAGPHYPMMVDRFHAVIGKEARAQSLEKWGGKPDV LVA  
CVGGGSNAMGLFHEFIDDES VRIIGVEAAGEGMGPQKHAATLTLGSPGVHLHGSFSYLIQDEEGQIIEPH  
SISAGLDYPGIGPEHSFLKDFGRAEYHAVTDQEALDAFVRVSRCEGIIPALETSHAFAYLEKLMPTLKKG  
QKVILNCSGRGDKDVNTAAALNISGEVDI\*

>Phypa1\_1\_177951\_estExt\_gwp\_gw1.C\_270122

MAMAALAPAQATSPIASCQAVLKP SALKDARHSKINALYSSLNGTACVFTCDSPLRKGASVSHGHVRC  
AEDVHTRDRDDVRYTYKGYERPDSFGRYGVYGGKYVPETLMAALSNLEVAYRATIKDPEFQKELNGVLKDY  
VGRETPLYFAERL TEHYKRDGKGPLIY LKREDLNHTGAHKINNAIAQALLAKRIGKRIIAETGAGQHG  
VATATV CARFGLKLECIYMGAAQDMERQALNVRMRLLGAEVVRVNSGTATLKDATSEAIRDWVTNVEDTHYL  
LGSVAGPHYPMMVDRFHAMIGTEVRRQAMEKWGGKPDILVACVGGGSNAMGLFHEFIEDETRIGVEA  
AGFGTNTDKHAATLTMGEIGLHGAMSYLLQDADGQIIEPHSISAGLDYPGVGPEHSFLKDVGRAEYFSV  
TDDEALEAFQRLSKLEGIIPALETSHALAFLEKLCPTLEDGTRVVLNCSGRGDKDVNSVIGYLKGY\*

>Phypa1\_1\_112098\_e\_gw1.3.135.1

MAALAPTQATGCTASFQVVRKPSALKDARLTQINALSSSSINGAAGVFARDAKDVHTRDQDDIRTYK  
HERPDSFGRYGIYGGKYVPETLMDALSNLEVAYRATIKDPEFQKELNDVLKDYVGRETPLYFAERL TEHY  
KRDGKGPLIY LKREDLNHTGAHKINNAIAQALLAKRIGKRIIAETGAGQHG VATATV CARFGLKLECIY  
MGAAQDMERQALNVRMRLLGAEVVRVNSGTATLKDATSEAIRDWVTNVEDTHYLGSVAGPHYPMMVDRF  
HAMIGTEVRRQAMEKWGGKPDV LVA VACVGGGSNAMGLFHEFIEDEDIRLIGVEAAGFGTNTSKHAATLTMG  
EVGVHLHGAMSYLLQDGDGQIIEPHSISAGLDYPGVGPEHSFLKDVGRAEYFSVTDDEALEAFQRLSKLE  
GIIPALETSHALAFLETLCPTLEDGTRVVLNCSGRGDKDVNSVIGYLKGY\*

>Phypa1\_1\_66768\_fgeneshl\_pg.scaffold\_12000053  
MNAQKFENPSILVDGERILLATGRPAAWGLKRPDFFGRYGVYGGMYVPETLMTALSNETAYRSTINDTE  
FKKELNEVLRDYVGRETPLYFAERLTHEYKRDGKGLIFLKRGDNLHTGAHLINNAIAQALLAKRIGKKR  
IIAETGAGQHGVAATATVTCARFGMECIVYMG AQDMERQALNVFRMRLGAEVRPVNSGTATLKDATSEAIR  
DWVTNVETTHYILGSVAGPHYPYMIVRDFHSMIGAEVRLQAMEKWGGKPDVLLACVGGGSNAMGLFHEFI  
EDDSVRLIGVEAAGLGADTDNHTATLTMGAVGVHLGAMS YLLQDADGQIIEPHSISASLDYPGIGPEHSF  
LKDVGRAEYYSVTDDEALEAFQRLSKLEGIIPALETSHALAYLDKLCPTLEDGARVVLNCSGRGDKDVSS  
VIGYLNKGK\*

>Phypa1\_1\_124222\_e\_gw1.48.132.1  
MPRQWYNIIPDLPIPPPPPLHPGTLQPLQPYDLAPLFPMALVQQEATMDRFVDIPDEVLQVYKLRWPSPL  
YRAWLEKLLDTPARIYYKYEGVSPAGSHKPNTAIPQAWYNAQEGVKRLTTETGAGQWGCALAFACFLFD  
LECEVWQVRASYDQKPYRKSMMETWGATVHPSPSPLTKVGGQAILDKDPTTPGSLGIAISEAVEAALARD  
TRYALGVLNHLVLLHQTIIIGEECLRLDILGETPDLVGGCTGGGSNFAGLSFPFIREKLAGKMNPIRAV  
EPAACPSLTRGVYAYDFGDTSGLTPLMKMHTLGHDFIPDPIHAGGLRYHGMAPLVSHVYELGLMEIAIAP  
QVECFEAALKFARTEGIIPAPEPTHAIATAIREALACKESGEAKVIVTALCGHGHFDLASYDTFLAGGMV  
DLQYPTDKIRESIPKLPKSS\*

>Selmo1\_85784\_e\_gw1.7.232.1  
MAAEVLNAQYGGFQRPDAFGRFGKFGKGYVPETLMTALADLEAAAYRLLVVKPEFQQLAGILKDYVGRE  
TPLYFAERLTQFYKNANGTGPDIYKREDLNHTGAHKINNAVQALLAKHIGKKRIIETGAGQHGVA  
TVCARFGLCEVYMG AQDMERQALNVFRMRLGAEVRPVHSGTATLKDATSEAIRDWVTNVETTHYILGS  
VAGPHYPMLVRDFHTVIGKETRRQALEKWNKGPDLVACVGGGSNAMGLFHEFVNDNDVRLVGVVEAAGF  
GLDSGKHAATLTKGEVGVHLGAMS YLLQDEGQIIEPHSISAGLDYPGVGEHSFLKDMGRAEYHSVTD  
EALEAFQRLSRLEGIIPALETSHALAFLETLCPTLEDGCKVNVNCSGRGDKDVQSAIKYLKFEA\*

>Selmo1\_80089\_e\_gw1.3.1171.1  
MHHRVLRRLYDVPATRRLLSVRRCSNTKVSLEKDLPAKWYNITADLPQPPPPPLDPRSLEPLKAEGM  
GALFPQELIRQEMSSDRYIGIPDEVLA VYKLRPTPLFRAKRLERLLETARIYYKYEGVSPAGSHKPNT  
AVPQAFYNAKEGIKRLTTETGAGQWGSALAFACSIFNLDCEVWQVRASYDQKPHRKTMMETWGAKVYVSP  
SAITATGRKMLAEDPNCPSGLGIAISEAVEVAVQDSNTHYALGVLNHLVLLHQTIVIGEECLQLAKAGET  
DVIDLIGCTGGGSNFGGLAFPFLREKFAGKMNPIRAVEPAACPSLTRGVYAYDYGDTAGFTPLMKMHTL  
GHDFIPDPIHAGGLRYHGMAPLISHLYNLKLMIAIAPQKCEFCQALQFARSEGIIPAPEPTHAIATIR  
EAERCRESGEAKVIVLALCGHGHFDLASYEKFLSGEIEDLDYSDEKAAAAMASIPVVK\*

## TTGs

>TGG1/BGLU38\_AT5G26000  
MKLLMLAFVLLALATCKGDEFVCEENEPFTCNQTKLFNSGNFEKGFIFGVASSAYQVEGGRGRGLNVWD  
SFTHRFPEKGGADLNGNDTTCDSYTLWQKDIDVMEDELNSTGYRFSIAWSRLLPKGKRSRGNVPGAIIYYN  
GLIDGLVAKNMTPFVTLFHWDLPTLQDEYNGFLNKTIVDDFKDYADLCFELFGDRVKNWITINQLYVTP  
TRGYALGTDAPGRCSPKIDVRCPGGNSSTEPYIVAHNQLLAHAAAADVYRKYKDDQKGMIGPVMITRW  
LFPDHSQESKDATERAKIFFHGWFMGPLTEGKYPDIMREYVGDRLPEFSETEAALVKGSYDFLGLNYVVT  
QYAQNNTIVPSDVHTALMDSRRTLTSKNATGHAPGPPFNAASYYPKGIYVMDYFKTTYGDPLIYVTE  
NGFSTPGDEDFEKATADYKRIDYLCSHLCFLSKVIKEKNVNVKGYFAWSLGDNYEFCNGFTVRFGLSYVD  
FANITGDRDLKASGKWFQKFINVTDEEDSTNQDLLRSSVSSKNRDRKSLADA-

>TGG2/BGLU37\_AT5G25980  
MQHNTYIYILTMKLLGFALAILLVVATCKPEEITCEENVPFTCSQTRDFNKQDFESDFIFGVASSAYQI  
EGGRGRGLNVWDGFTHRYPEKGGADLNGNDTTCDSYRTWQKDLVMEELGVKGYRFSFAWSRILPKGKRS  
RGINEDGINYSGLIDGLIARNITPFVTLFHWDLPTLQDEYEGFLDRITIIDFKDYADLCFERFGDRVK  
HWITINQLFTVPTRGYALGTDAPGRCSQVWDKRCYGGDSSTEPYIVAHNQLLAHATVVDLYRKYQGG  
KIGPVMITRWFLPYDDTLESKQATWRAKEFFLGFMEPLTKGKYPYIMRKL VGNRLPKFNSTEARLLKGS  
YDFLGLNYVVTQYAHALDPSPEKLTAMTDSLANTSLDANGQPPGPPFSKGSYYHPRGMLNVMEHFKTK  
YGDPLIYVTENGFSTSGGPIPFTEAFHDYNRIDYLCSHLCFLRAIKEKRVNVKGYFVWSLGDNYEFCNG  
YTVRFGLSYVDVFNNTADRDLKASGLWYQSFRLDRTTKNQDILRSSLPFKNGDRKSLT-

>BGLU47\_AT4G21760  
MKKSIVYEIMETKSSMYLSQFRLWLCFIITLVSLSSTRWYDDHISLKEIHAETFFHP  
KNFLFGTASSAYQYEGAYLTDGKTLNWDVFTNISGKIADGSHGKVAVDHYHRYPGDLDL  
MEDLGVNSYRLSLSWARILPKGRFGDVNMGGIDHYNRMINDILKTGIEPFVTLTHYDIPQ  
ELEYRYGSWLNPIQIREDFEYANICFRHFGDRVKFWSFNEPNVQVILGYRTGTYPSPRC  
SKPFGNCSCGDSYIEPLVAHNILSHLAAVNLRYRTKFEQEQRRGQIGVMNTIWFEPISD  
SLADRLAADRAQAFYLTWFLDPVVFGRYPREMREILGDDLPEFTKDDLKSSKNALDFIGI  
NQYTSRYAKDCLHSVCEPGKGGRAEGFVYANALKDGLRLGEPVGMEEMLMYATERYKNI  
TLYVTENGFGENNTGVLNDYQRVKFMNSYLDALKRAMRKGADVRGYFAWSLLDNFEWIS  
GYTIRFGMYHVDFSTQERTPRLSASWYKNFIFQHRALS KDDWCLKQKEDTNFFLI-

>SFR2\_AT3G06510  
MELFALLIKVAGLLATVTVGANVVSYSRFRQNLAKFRSPIDESKEVLADFNSIEHEEGK  
FFFGLATAPAHAEDDLDDAWLQFAKETPCSAAEEAEAADKKARRKKVLA VGAITKGLAKN  
THGKEDKNAADKPPSKNVA WHNAPHAEDRLKFWSDPKVEVKLAKDTGVTVFRMGVDWSR  
IMPVEPTKGIKEAVNYEAVEHYKWLKVRNMGKVMMLTFHHSLLPPWAADYGGWKMEKT  
VDYFMDFTRIVVDSMYDLVDSWVTFNEPHFTMLTYMCGSWPGNPPDFLEIATSTLPMGV

FHRALHWMVAHASKAYDYIHGKISLKKPLVGVAAHVFSFMRPYGLFDIGAVTISNSLTIFP  
YIDSICEKLDIFIGINYGGVRELQVKIAIRSQILINNIASFISMLESDSRNQEAUCGAG  
LKLVEITDEYSESGRQVYVYDGLYRVLMLFHERRYKHLKVPFIVTENGVSDETDVIRRPYLIE  
HLLALYAAMELKGVPVLYGIFWITSDNWEWADGYGPKFGLVAVDRSHDLARTLRQSYHLFS  
KIVKSGKVTRKDRSLAWNELQKAAGKGLRPFYRGVDNHNLMYADGLDKPQWRPFVDRDW  
RFGHYQMDGLQDPLSRVARTLLIWPLIMKKRIRKVKIKHTDDAGLVLHPALASPF-

>AT4G36360

MREMGTDGDSASRLILWFCLGFLILGVGFVQCGVTYDRKALLINGQRRILFSGSIHYPRST  
PDMWEDLIQKAKDGGIDVIETYVFWNLHEPSPGKYDFEGRNDLVRVFKTIHKAGLYAHLR  
IGPYVCAEWNFGGFPVWLKYVPGISFRDNEPFKRAMKGFATERIVELMKSENLFESQGGP  
IILSQIENEYGRQGQLLGAEGHNYMTWAAKMAIATETGVPWVMCKEDDAPDPVINTCNGF  
YCDSPANPKPKLIWTEAWSGWTFEFGGPMHHRPVQDLAFGVARFIQKGGSFVNYMYH  
GGTNFGRTAGGPFVTSYDYDAPIDEYGLIRQPKYGHLLKELHRAIKMCEKALVSADPVVT  
SIGNKQQAHVYSAESGDCSAFLANYDTESAARVLFNNVHYNLPPWSISILPDCRNAVFNT  
AKVGVQTSQMEMLPDTRKDFQWESYLEDLSSLDSSFTTTHGLEQINVRTDSDYLWYM  
TSVDIGDSESLFHGGELPTLIQSTGHAVHIFVNGQLSGSFGTRQNRRTYQGKINLHS  
GTNRILLVAVGLPNVGGHFESWNTGILGPVALHGLSQGKMDLSWQKWTYQVGLKGEAM  
NLAFTNTPSIGWMDASLTVQKQPLTWHKTYFDAPEGNEPLALDMEGMGKQIWNVNGES  
IGRYWTFATGDCSHCSYTGTYKPNKQCTGCGQPTQRWYHVPRAWLKPSQNLVIFEEELG  
GNPSTVSLVKRSVSGVCAEVSEYHPNIKNWQIESYKGGQTFHRPKVHLKCSPGQAIASIK  
FASFGTPLGTCGSYQGECHAATSYAILERKCVGKARCAVTISNSNFGKDPCPNVLKRLT  
VEAVCAPETSVSTWRP-

>ChlNC64A\_1\_50621\_fgenes3\_pg.C\_scaffold\_4000120

MGWGVLVAAILLCLSSSTRAQTVECTVTELDGSTSTLRPGPFVPPAGAASAAAPAPRGACPNPLAVPAAS  
KAPFLGSATAAYQVEGAAAEGGRGPSIWDTFSHLPGKTHEGDTGDRADDFYHRWANDIALMRSLGLRNF  
RLSLSWTRLFPNGTVGDLNPEGVAFYDGLFDALRAACIEPWWTLYHWDLPQALQDEYGGWVDERIVEDFA  
AYAQAADFLLFGDRVYKWFNLPETFCPLGYETGTFAPGRCSDRTRCLEGNSSTEPHLCAVHVLAAAA  
VSAFRQGFRCRSCGQACSLEACSLCAGESVPGGQIGMTNAIGWAAPYTGSAEDVAAAERQSQFTGAWFLD  
PLYRGDWPAPERKAVYGDLLPSFTPEQRRFILDNPQDFIALQHYTGNYVYQATNPPLLSSTTKSSDGYQ  
LPQADSPWLFVFPKALRSLGLWLRHRYGAPIITENGVSAPGEASKPVLEVLCDQFRLSYFQQYISNATA  
AKRDDGVDLRGYFAWSLLDNFEWADGYSKRFGITYVDFDSLARYYKASAMWLSWFGMGAVTSAGA\*

>ChlVu1\_28225\_e\_gw1.6.151.1\_BGLUs

MRKRTVLCVSPITLCQQFEGAYYEDGKGMISWVQANNPGLPEGDRIHDNHTGNVANDFYHRYKEDILL  
AKELGATQFRFSISWARIFPNGDGSINQVGLKHYVDMVDFILSIGMEPVVTLYHWDLPQALQERIGGWNS  
EQVAPVFAAYAAATMFEALGDKVITYWSTINEPKTFCWEGYNGGHPANIHSVVRTHPNRASMSANCTINVL  
RAHAAAVERFRALVPGGFSMNINVETSLPYDSTSELDTAAAQRKMDFEVGVYMDPIFFGQFPDSVRARL  
PYLPDITPKLADALKGSMDYIAMNHYTSSYALCIEHSDYDVPDNHVKNKNGFVIGKQGDGSLYSPFLGFR  
MALNYMNDRYKTDIFISVTENGFMVKGEDDMTMEILNDKARIEYFEEYIKNAIAAVVYDKVPIRSYFAWA  
LMDNFEWKDGYSKHFGVMYWRFTQVRIKASARWMMQNKFLDAPGN\*

>ChlVu1\_34087\_e\_gw1.22.46.1\_BGLUs

MWPLGGQVEGAYKEDGRGMSIWDTFSSHPTGKTAQGHGTGDVAVDYFHYRYEADIAIMKSLGVKVFRESISWP  
RILPQGTGRVNLKLVQYQFVSKLIDALLAAGIEPHVTLYHWDLPQALQARHTASHNNALFNLPGCVDVQDKY  
GGWLSDKSIKDFAAAYAEVCFKAFGDRVSFWTTFNEPWSFIWIGYGMGIHAPGALQLSAMSMAEGDSARE  
PWVVTHNVLLAAAAVERFRALVPGGNISINLNAEWSEPMSTSSVADKEAAQRNLDLFIADPIFLGDY  
PASVRSRITDLPEFTPEQRASLKSADYFALNHYTSRYISHDEEA VPTGLSAHTRNGKAIGKQADSDWL  
LAVPWGFRLLAYVHRRYGAPEIWWTENGCDAPEGDDAAFPVLEDTFRLQYYQEYLAEAMKAVTEDGVN  
IRGYFAWSILDNFEWADGYTKRFGIVYVDYKHGLLRHLKASAKFLAALFGPEPLAAAAAIIQSATVD\*

>ChlVu1\_70390\_fgenesCV\_pg.C\_scaffold\_1000149

MGSSLVVOGAVVIALLICLASDQVAGTLGRGKSFVDNGLSLVAPEVQVEGAQTKPPFYLGATAAPQIE  
GANATDGRGPSIWDTYAAPGNIDSGDTSAVADDFYHRYLNDIAAMHLLGVKFRMSLAWPRILPGGDGQ  
VNDKGINFYGRVIEALLVAEIEPHVTLYHWDLPQALQDRFQGGWNSDQVPIFAEYAATAFKAFGDAVHW  
TTFNEPWTFCFLGYGQSGAPGLNDKVQAWNCVHNVLKAHAAAVKQFRALVPNGKISMNLNCDWAQPLTA  
SPDKAAAEKMEYMLAAAFADPIFKGDYPASVKQRISFLPQITAMAADLKGSDYFALNHYTSTYVADK  
EGAIGLQGPCDYSETQVDLAGKLGAEAEESDWLKVPWGFRLMLNWNDRYQPKIIVTENGLMKGEDA  
MPMPQALQDTQRVNFYRDYIAAAATEAVTIDKVPMTGYFAWSLLDNFEWGSYKRRFGVVHVDFTTQRRY  
KASAKYLVTFLKCTLLDPTFTYPSD\*

>ChlVu1\_72847\_fgenesCV\_pg.C\_scaffold\_6000039

MSSVAWHVQFEGAYRADGKGASIWDTFTNNHTVFPGGRTVHKNDTGNVAVDFYHDKQILLAKQLSAKQ  
WRVSVSWARIYPQGDGVVQKGLDYKEMVDFMVAIGIEPVLTCYHWDLPQALQDRFQGGWNSDIVPIFA  
NYTATLFEALGESVKYWTINEPKTFCWEGYSGIHPGKIKEPEQVANCIVNLKAHAAAVKVRKVVPG  
GMIAMNLAESSLPFDDSEMDKAAAQRKTDDELGVFADPIYFGQFPDSVRARIPYLPISPELAKDLKG  
SFDYFALNHYTSSYARFKHNATCVLGITDYEVGHSNKDGFVIGEGDSEWLYSVFPFGRMILNYVNDRYR  
LDWISVTENGQVKGEDDMALDQVLNPKRIKYLEYIKNAVEAVVIDKVPVSSYFVWSLLDNFEWQDGY  
SKHFGVVHVDRAATLQTLKASARVLANLFDQDAGN\*

>Ost9901\_3\_2583\_gwEuk.11.143.1

FPPSFAFGVGTSAWQIEGNGDRPRSVDFAVSELGEEKRVEAERGIFHERYAADAQMMADAGVKHFKM  
SLSWPRLMRADGSAIDEGFEYYQNVFGALRERGVPEHVTLFHWDTPIVCEGAWVKDEILKDFEKYADAVF  
SRLGKGIKYWTTISEPKTVAEMGYGAGLHAPGRRSVEEQLKVGHNMLRAHALAVALYREKYSQFGGKLSI



NLNSAWVEPASDSDPDDVRAAANAMDEELGWFADPIYKGDYPASMRARLGSFLPEFTEEERVLVKGSVDYF  
ALNHYSYFAKHVTDQAASSQLGLSGRPQPWEITLSEKSKKPIGKEAQSDWLHIVPWGLEKVLHDKDR  
YDDPAIMISENGVDIAERGDIAETLDDTTRVKFIDAYLGAAREAMRKGANVVGYFYWSMFDNVEWVDGRS  
KRFGLVYVDYDGKYGEKMKRYPKKSLEHFSSYM

>Osta4\_24257\_estExt\_fgenes1\_pg.C\_Ch11.00010162  
MRRRGREIDRASFGAVLVAASLALLATARASDEATLATEHPKSRAIPSRVSGASTSASADPHGAVTVLKAS  
NARFPASFAFGVATSAAWQIEGAGGKRPESTWDAFAAAATLGRDAAAEMRRGIEFYERYEDDVKMMSEAGVK  
NFKMSLSWPRLMRADGTRKREEGFKFYERVLGALRKSIEPHITLFWHDTPWLCFANRTRSSNGVCEGAW  
ARDEVVEAFETYADAVFERLGKGVKYWTITSEPKTICELGYGAGMHAPGRRGVEEQLKVGHNMILLAHARA  
VALYRKKSRKLIKGSVDFALNHYSYVVKHVPAPVAASQLGIGGKQPWEITLFAESSKEPIGKEAQS  
NWLRVVPPWGLEKILLHIKEKYDDPEIITENGVDIAEKGDIAETLDDSERVQFIDAYLGAARSAMRKGAK  
VIGYFYWSMFDNIEWVDGASKRFLVYIDYSGKYGQKMKRYPKKSLEHYSAYMRGEHAEPEPEPALGV  
ARENAMDDMIASFGRSDGEALAMRGLGVTFACVFIAAALAKRVRIDIDDTNEHSGLV\*

>Phypa1\_1\_107172\_estExt\_fgenes1\_pm.C\_1380003  
MITRSAGFYALQVTGFILLVLPILVLFQLPRAITPHRIDPSVLPCKLHQDAELSNASTCVPFHRSFLPE  
GFVFGTATSSYQVEGAANVSGREPSIWDTFSRIPGKISDGKTGDVAVSDQYDKYMGDIDLMSQLNVDAYRF  
SISWTRVMKLGGETPEVNVQEGVAYNNLNLINGLLKKGIPQFVTLYHWDLPQSLNDAYGGWIDRKYVNDYAQ  
FAEACTFAGDRVKHWFITFNEPQTFVLYGNGIHAPGRCSDRSKCTAGNTATEPYLAAHNVLLAHAAAV  
DVYKRFKAMQGGAVGSLDCEWGEPEPNSAADVEAAERHVLFLQGWFLDPPIYRGDYPVAMRTNVAVGNRLP  
EFTADELALLKGSDFLGNHYTSRIFSSGSGPGNALTSDHWDQDQILSSVTSRNGSQIGHQAASEWLVI  
VPWIGKTLVWLTERYQKPLIFVTENGMDLDDGSKPVPPELLNDVNRIDFYENYLSVLSAIGNSDVRGY  
FAWSLMDNFWEWSMGYTRRFGLLYVDYDNQQRSLKESAKWFSRFLTRAK\*

>Phypa1\_1\_110732\_e\_gw1.1.523.1  
MRTRCVCGLFVILFLVSAFVSVVDARSHYHYDLRSQSSDESSDPLVASKLNVYATQQFPGELTKSHFPEGF  
IFGSAGSAQLEGAAFQGNKGRSIWDEFVTRKGTIDNSTGNIATDHFHRYPEDIWLMKDIGFDAHYLSI  
SWPRIFPDGVGVNKEGVYFHKMFDALLEAEIEPYVTIYNWDMPLSLEETMGGWVLSNMVVIYKGFARF  
CFKEFGGKVKKWLTFNEIHSFVQLGYLSGIFAPGRCSQPYGNCIKGDSSAEPWIAAHNALNGHAHVNIY  
KKEFQKHQNTGIGKNDKMWYFPLTNSKEDKEAAQRGLEFYLGWFMDFIIFGDYPLSMRNYLGARLPKFT  
KKQKTLIKGSYDWIGFNHYSTQYAYHTNQITIDNSGVGFTPYCNGTIIGPEAASPWLWIYPSGIRHLLNW  
IRDRIYNNPIYITENGVDENFTAKTLIAQQLNDTTRINYYHDYLVLLAIKDGCDIRSYFAWSLLDNF  
EWATGYTVRFGLYYVDFDNDQARYPKASAFWFRKVLKGDK\*

>Phypa1\_1\_117888\_e\_gw1.22.261.1  
MLNTSSELGGVMRRSLFPEGVFGSSASAYQYEGAAAEDGRGPSIWDEFVTRKGTIDNSTGNIATDHFHRY  
RFEEDVKIMKDIGLDAIRFSISWSRILPHGRGFINTAGVAYYNNRLINELHRQSIVPFVTLHHFDLPLALE  
QTGGWRNADTASAFEAALCFSLFGDRVKYWITFNEIHLAMNGYRFGIGPPGRCSASSGDCFAGSDSDV  
EPLLVVHNALNAHALAVSVYRMKFQSKKGLIGLIEDGSWFPECKDDEDRDAALRANEYWLWGWLDPLF  
FGEYPASMAVDFHRKTLPRFTKEQSALLKGSDFLGNQYTSQFATYDKHSVENNDVTSRMRQLPRCNGV  
PIGPAAAVGWYIYVYDGMKQDLCIRTRYGNPVYITENGFPPTNANDEPWSQEVQDFDRISYHHYMQS  
LLSAIRGGSDVRGYFVWSSLLDNFEWHEGFRIRFGLYQVDIGSTLNRQAKASARWFKMLMDRVLGGGGVDA  
KTAR\*

>Phypa1\_1\_122262\_e\_gw1.39.98.1\_BGLUs  
MQNEPRQVRKSNEFPEGFRFGTSSAYQYEGAVNASGRGPCIWDASHTPGVIHDNSTGDIATDHYHRYQ  
EDIELMAHLGVGTYRFSIAWTRIFPDGRGPTNAEGIAFYNRIDTLLSTGIEPFVTVSHYDLPQTLQDE  
FGGWRSRHIVPLFTFFAETCFAAFVDRVKYWITFNEIHNAYAIKYTNIGCRNPSGLCAPGNSSTWVYTAGH  
HMLLSHAFAVEVYRKFQTKQGGKIGIVADAQWYEPYSDNPWDIAAVDRMQAFQVRWYVLDPIYGRYP  
EMLVDRLGDRLPREFSEGEAQLLRGSVDFLGINHYTTHYAVDQTNSTEQLDGSAASVSRGGVPIGPKAGS  
IWLNIYVPIGQKVLNRYIRIQYNNPIVYITENGVDENDPGIPLDVALKDSFRTKYHVDYLSYVNAAIRDG  
CDVRGYFIWSSLLDNFEWDDGLSKRFLYVYVDYDHNQTRYAKDSAKWFKFLRPLRPNHAKS\*

>Phypa1\_1\_159036\_estExt\_fgenes1\_pg.C\_90048  
MAFTNRAGIVFCAVFTLLQKLNGAELLPNVERASFPKGFIFGTATAAYQYEGAASEGGKGPSIWDTFSH  
QPGKIQGNGTGDIADVQYHRYVEDVWLLKDLNMEAYRFSISWPRVFPKGTGVVNWEGVKYYDNLISELLK  
LGIEPYVTLYHWDMPQALEDSIGGWLSQIPEPFARYARFCFERWGTVKVHWITFNEIHSFAGAGYYTGV  
MAPGRCSAPYGNCSQGNLSTEPYIVSHHALLSHAQVVDIYRKEFQADQHGIVIGITDCTWYEPDQGSAS  
DKQAAEYSVQAFGLWYLDPIFFGDYPASMRESLGSRLPTFTKEEAALIKGSQDFVGINHYTSNYATYNSS  
TGEITQTGYRNGVPIGDPVSEWLFIAPTGMRKLLGWVRNRYNNPIVYITENGVDSEANKDQELPLVDQLK  
DSVRINYHYSYMQNLLAIRDGSVDVRGYFAWSLMDNFEWA VGYTVRFGIYVVDYKNGLARYPKSSVHWFQ  
QILKKKRVV\*

>Phypa1\_1\_191953\_estExt\_gwp\_gw1.C\_1700037  
MAGCFWNWGAACLLAISSLTTCISGARGESLQLGGIEAGCRQNVLLRSDFPDGFGLFGASSAFQVEGAVAE  
GGRGPSVWDTMSTHPGMIADNSTGDEVSDQYHHYLEDVELMADMGLDAYRFSISWSRIFPGGRVRSVPEG  
VAYYNNRLIDALLARGIQPWVTLYHFDLPQALQDITLGGWLNPEIVSFAEYAEELCFTAFGDRVKHVVTFNE  
IHHVAFVFPNVGCRSTSGVCGDVNSQSYIIGHMILSHAKAVNIYRTKFKRHLGSGIHIIDVQWYEPIS  
DLQEDIDAERMMTFQMEWIMDPVHVGCYPALMRDLIQDRLPSFTEDEATLKGSDFIGLNYHTAHYVK  
SDPNGLFSRYGVETHDAQVAIFNSKKGVPIDPAGSAWLQVWPWGIEKVLERFKVLYNNPLIFITENG  
DEAEDPGVSLGSLQDRVVRVQFYHDYLYVISALRNGSNIGGYFAWSLLDNFEWLDGLSKRFLYVVDYK  
NGGKRLPKSSVAWFKQLLRNRDRSEHSTC\*

>Phypa1\_1\_229483\_fgenes2\_pg.scaffold\_76000003

MSATHSNGTDCVPFHRSFLPDKFVFGAATAAFQVEGAAYEGGRETNIWDTFSKTPGKTVDGKGDV ASDQ  
YHKYLEDIDLMSQMNLDARFSAWSRIMKLGPNPVVNQEGVAYYNNLNLGLLKKGIQPYVTLYHWDLP  
QYLSDYRGLWDRRVVNDFAALYAETCAAFGDRVKHWMTFNEPQQFSNLGYGIGLHAPGRCSDRMKCEP  
NSATEPYLAGHNALLAHA VAVDIYRKKFKATQGGMVGIAVDCEWGEPMTDSPADKEAAERHVLQFLGWFL  
DPIYYGDYPAVMRKYVGDRLPLFTPDEITLLKGSDFIGLNHYTSRFVAAGTPPANALASSYWEDQAMVS  
SVTRNGELIGNRAASEWLYIVPWGIGKTLWLTERYQKPLLYITENGMDDSDDLGNTKLATDFLNDNSRI  
AYYENYLVSSVLESIRNGANVRGYFAWSLMDNFEWAMGYTRRFGLVFVDYDHDQKRYLKDSAKWYSRFLSR  
PM\*

>Phypa1\_1\_231697\_fgfnesh2\_pg.scaffold\_13700014  
MDFGDDVTRSSFPGFVFGAASAAAYQYEGAASEGGGRGPSIWDTFAHNSGKIKGNATGDVAVDQYHRFQED  
MWLLKDLNMDAYRFSISWSRIFPSGVGEVNWKGVQYYDRLIDFLTKHDIEPWVTLYHWDMPQALEDSIGG  
WLSLDIVNMFEQYARFCFQRWGTKVKHWITLNEIHSFAVDGYRIGSKAPGRCSPPLEGECPTGNSTTEPYI  
VGHALLSHAQVVNLYKKEFQEEQKGVIGITLDSLWFEPLDSNSSLDKQASKTALGFLGWFMDFPIFFGD  
YPASMKITLGSVLPNFTLEQKSLKGSQDFIGINQYTSNYATYNTTNGELIRTPYKDGVPIDGQTASYWL  
FVVPSSGMQKLMGWIRERYNNPIIYTENEKNKDGCMTLKDQLKDPERIQYYHDYLNLLWALRNGSDIRG  
YFAWSLMDNYEWADGYTVRFGIYYVDYKNNLARYPKDSAFWFQHILKGD\*

>Phypa1\_1\_235009\_estExt\_fgfnesh2\_pm.C\_1100003  
MMGRDGLPFLIFALVALSMFLFLQLPREELSPRNDPTVLPCKLHNIKHANDTTCPEFHRSFLPQNFV  
FGAATAAYQVEGAANESGREPSIWDTFSTPGKVLHNHTGDV ASDQFHKFLDDIDLMTQLNVDA YRFSIS  
WSRIMKLGGSNPVNVNEEGMAYYNNLNLGLLKKGIQPYVTLYHWDLPQSLQDSYGGWLDLRRVNDFTQYAE  
ACFTAFGDRVKHWITFNEPKSFTVLGFGNGIHAPGRCSDRTLCPAGNTSTEPYITAHHVLLAHAAAADV  
RKKFKDTQGGMIGISVDSEWSEPLTSSVEDKEAAERHTLFLQFLGWFLDPIYRGDYPAIMRTHVGARLPVFT  
ADEHALLKGSDFIGLNHYSSRWISNGVRVENSNDNWDQAIESSVTRNGTQIGDVAASEWLFIVPWG  
IGKTLVWLTQRYENPPLFVTENGMDLSDKPMVLLNDTTRVAFYENYLFVLEAIRNGSDVRGYFAWS  
LMDNFEWAMGYTRRFGLYVDYNNNQQRHLKESAKWFSRFLSRGV\*

>Phypa1\_1\_83534\_fgfnesh1\_pg.scaffold\_114000081  
MIIEELPTVQRSSPFGFVFGSSTAAYQIEGAAREAGKGASIWDFISHQPGKILGNKTGDIAVDHYHRYA  
EDIWLLKDLNMDAYRFSISWTRIFPNVGVVNWEGVKYDNLIDHVLLEGLIDPYVTLYHWDMPQALDNSI  
GGWLPDIIIDFSKYARFCFERWGSVKHWITFNEIHTFAISGYMTGVMAPGRCSAPVCVAGNSDTEPYI  
VAHALLSHAHAVDIYRKEFKDTQGGMIGITDSMWFELDSNSSDKQAAQEAVEAYIGWYLDPIFYGH  
YPASMRNLGSLNPTFTAEEAALVKGSDQDFVGINHYTSMYATFGISGEIVKTYKDGVPIDGPTPSDWLF  
VVPFGRKLLNWVSERYHNPILYVTENGRAEFNKEDSMPIEDQLKDPERIRYYHDYMQNVLLAVRDGCDV  
RGYFAWSLLDNFEWSEGYTVRFGIYYVDYKNGLARLPKSSVFWFRQVLRKTFNL\*

>Selmo1\_127964\_e\_gw1.88.111.1  
MVALIFAFLLVRAVEGHEILSRSPKGFVFGTASAAAYQYEGAAKEGGGRGPSIWDVYAHTPGKIMDGT  
GDVAVDQYHRYKEDVGLMVDMGVDA YRFSISWVSDFPWGKINQEGVAYYNNLNLINELLKKGIQPYVTLFW  
DSPQALEDAYKTVLSSRIVDDYAA YAEACFRAFGRVVKHWITFNEPHVVCNFGYNFGMLAPGRCSSEVGN  
CSAGNSSVEPYIVGHHILLSHASAVKIYREKYQEKQAGIIGITLDAQWHEPFSRSSKDKAAAGRALDFNL  
GWMLDPIMFGDYPATMRSRVRDRLPKFTKEQSKRLKGSDFIGINHYTSFYDADASNSNLSQAAFSQQAY  
FKDTGVFSTDMRNGGLIGQNVNGFYIVPFGMRLLNRYIRLRYNNPTIFITENGISDVNTATAPLKEVLND  
TTRVNFLLKAYLSNLRAAIADGSDVRGYFVWVSLDNFEWWSRGLSVKFGLYHVEYKDLQRVPKKSAAWYK  
FLRK\*

>Selmo1\_144295\_estExt\_Genewise1.C\_80167  
MGLLNCNAAFFLLAWLTISARADQTLGRCDPFDFFIFGASASAFQYEGAVDEGGGRKPSIWDIFAANPRN  
IADGSSPNITDDQYHHYRDDVLLKLNLMDSYRFSISWTRVFDHGRVNPPEGVAYYNNLIDALLEHGIKPF  
VTIYHWDLPQTLQDKFGGWLSRDIVDEYLRFDICFQAFGDRVKNWLTFFNEPHQLVNGGYVQGYAPGRC  
TGCPQGNSSTEPYIVGHHLLLAHAKAVKLYRKYKVNQRGVIGMTLDSFWYEPYSSLPRDIAAARRALDF  
ELGWFLHPITFGDYQSMRLYVGDRLPAFTVEESRDLRNSMDFVGLNHYTSRYTQDNPWPSNVRPGYESD  
SHTHFLTERNGISGGTGTWLYVVPWGLYNILNHVKENYNNPIIITENGLVDV ADSNTFSDRFIKDDA  
RVQFYESYLTSLQQAANGVDVRGYAWVSLDNFEWWSRGLSVKFGLYHVEYKDLQRVPKKSAAWYKFLS  
NTKCSVLETM\*

>Selmo1\_149851\_estExt\_Genewise1.C\_240681  
MECVLLVFLGLFLVTNAAYVNLRSASFPGFTFGTATSAYQVEGAACKYGRGPSIWDVFIPTGRVQENA  
TGDVAVDEYHRKEDIDLMDLMDAYRFSISWSRIFPEGKGRVNRVGVAYYNNLIDYLLKGIQPYANL  
NHYDLPESLEKDYEGWLSREVVKDFTNFAEFCFKTFGDRVYKWTFFNEPRVVAQLGYDNGQFAPGRGSTP  
YGNCTEGNSATEPYIVAHNLLSHGSAQVYRKNYQEKQKGSIGILLDFVYEPFSNSTEDIDAAQRGRD  
FHVGWFLPEINGSYPKTMQYVGSRLPKFSKDDIEMVKGSDVDFVGINHYTTYAKDAGSQNRNTTDYFQ  
DMNIQMLHDRDGVSIGPRAHSTWL YIVPWGMYKALSUYIKEYHGNPKVVLSENGMDDPANLTLSQLHDTT  
RINYYSQYIENLVAAMRDGANVHGYYFAWSLVDNFEWWSRGLSVKFGLYHVEYKDLQRVPKKSAAWYKFLS  
LKR\*

>Selmo1\_151109\_estExt\_Genewise1.C\_300061  
MTSCSMVSLCSLRVASCGLASPAQKLNIGSRLSFPKDFIFGTSSAAAQYEGAAEAGGRKPSIWDHWCT  
LPDKIDDGNSPITMDQYHRYKEDVRLSDLVNAYRFSISWTRVFDHGRVNPPEGVAYYNNLIDYLLKGIQPYANL  
IKPFITIHWDLPQALQESMGWNTKEIVDKYVEFADICFAAFGDRVKHWITFNEPCHSLKYCYAEGIWP  
PGVKSDETEYIAGHNTLLAHAAAVKRYREKYQAKQGGKIGISLDGFWYEPVYQIPQDVAASYRALDFNLG  
WFLSPVYGYYPETMRANVGGRLPHFTEEEARNLMGSIDFLGLNYTSMYVKDPSDIWQPAYNTDMRA  
KTLFDVDGIPGPKAYETSWLSIVPWGFKLLNYIKKEYNNPTIFVTENGFNQVHAPYKDSMDDNERIQY  
LTGHYTNMAQAIRDGADVQGHFVSWFLDCWEWKSQYTNHFGFLYVDRNTQDRLPKKSAYWVKNFLKPDGR

LILPSATPPLVQPLGKNVALAPAQAVQAF\*

>Selmo1\_153534\_estExt\_Genewise1.C\_420306

MVSTTMVALIFAFLLVVRAVEGHEILSRRSFPKGFVFGTASAAQYQEGAAKEGGRGPSIWDVYAHTPGKI  
MDGTTGDVAVDQYHRYKEDVGLMVDMGVDAYRFSISWSRIFPEGRGKINQEGVDYNNLINELLKKGIQP  
YVTLFHWDSPQALEDAYKTLWSSRIVDDYAAAYAEACFRAFGRVVKHWITFNEPHVVCNFGYNFGMLAPGR  
CSSEVGNCSAGNSSVEPYIVGHHILLSHASAVKIYREKYQEKQAGIIGITLDAQWHEPFSRSSKDKAAAR  
RALDFNLGWMLDPVIFGDYPATMRSRVRDRLPKFTKEQSKRLKGSHPDFIGINHYTSFYDADASNSNHPQA  
AFSQQAYFKDTGVFSTDRNRLIGQNVNGFYIVPFGMRLLNYIRLRYNNPTIFITENGISDVTNATAP  
LKEVLNDTTRVNFLKAYLSNLRAAIDAGSDVRGYFVWSLLDNFEWRSRGLSVKFGLYHVEYKDLQRPVKK  
SALWYKKFLTK\*

>Selmo1\_163822\_estExt\_Genewise1Plus.C\_00869

MDNKSSVLFISLIAFLAGCGATGISRCDFFPKQFVFGTASSAYQYEGGAKQGRKPSIWDKFSHTFGKILD  
GSLNGDVAEDQYNYQEDILLMKELGIDAYRFSISWSRIFPDGNTTQVNAEGVNHYNNGFINALLANNIEPY  
VTLYHWDLPQALEDSIGWLSSEIVNRFAAYADACFNAGFDRIKYWITFNEPQSFATSGYDLGIHAPGR  
SILLCSKGNSTATEPYAVAHNVLLSHAAAARIYRTKYQARQGGTIGITLNSFWYEPNSNSTNNIAAAQRAL  
DFELGWFLDPVYGEYPAVMRDYVGHRLPMFTEEQRSLLSIDFLGLNHYYTTFASALPPPLIKNWDY  
FQDSRVFRTASRGGVSGIRRAASVWLYDVPWGFRLVSYVTHRYNQLPIITENGMDQSSFLSRSSALHD  
SHRIDFHSNYLSNLSAAIRDGADVRGYFVWSMLDNWEWSAGFTSRFGLYYVDYRDNLKRCPKASAAWFTN  
FLNQTCAIR\*

>Selmo1\_163827\_estExt\_Genewise1Plus.C\_00877

MVLVVFVVLVALSRSAVFGSQGEALSRCSPRPFVFGTSSAAQYQEGAVQEGGRGPSIWDIFSHNSTNIS  
DSSNGDVTEHQYHRYKEDVLLMKEMFMDAYRFSISWSRIYPDGQSSPANGEGIAAYNSLIDSLLEQGIQ  
YVTLYHWDLPQALEDSLGGWLNQIVKEFTKYAETCFDAFGDRVVKHWITFNEPHSFVREGYCLGVSAPGR  
CSGICGGNSATEPYVAAHNVLLSHASAAQVYKQKQFQAQQKGIKIALNADWYEPFSNSSADKAAAIRATD  
QLGWYVFLNPVYGNYPVMRSYVGSRLPQFTGNEARLLMSSLDLGLNHYSNYARDSPEVPPSMTNY  
DLDSRVSLVSRDVPVIGPKGSSTWLYVVPWGFRLKRYIKAHYKNPVIVITENGMDQASGHNSQSLGD  
KTRIDYHQEYLANLNLAITRDSVDVRGYFAWSLLDTWEWSHGFTVRFGLYFVDYTNGLKRYPKMSARWFR  
RLLCWNVTCLVTIV\*

>Selmo1\_228612\_fgenesh1\_kg.C\_scaffold\_4000013

MWINLHCVRAPALSRRDFPAGFHFGTAASSYQYEGAATTGGRKASIWDEFKIPGKIVDSTSGDVAIDQ  
YHRFEDDIDLMDVLTDAAYRFSISWSRIFPDRKINPEGVAHYNRLIDRLIEKGITPFVITLHSDTPLALD  
EEYGSWLSPIRDKFAEYAEFCFLSFGDRVKNWITLNEPHLQANFAYIIGLLAPGRCSQEYPRGCAAGNS  
STEAYLVVHNLFAHAAAAGIYRSRFQHQGGSIGAIDASWYELTSSRSDEEAAQRARDFEYGHWILDPI  
FFGDYLPDSMRLLVGDRLPRFSVEDKALVQGSLLDFLGNHYTTNYATTGLDFPLSLVGYKDHNVRLLAQK  
DGVSLGPQVNGINVPWGFELKLYIRVRYKNPRVITENGISDAVDSLNTSSNLGDLTRINYSISGYVDA  
MLTAIRKGSTIRGYFVWSLWCDNWEWTNGFTWRVGLYVDRHDNLTRYPKESAKWFKSFLAGKYNTIAML  
NSAAIK\*

>Selmo1\_268319\_estExt\_fgenesh1\_pm.C\_430004

MPSPEQDFATNSAGAARLPQRRDFPHRFVFGTATASYQVEGAFDEGGRGLSIWDTFCKTPGRILDASN  
GDLAVDQYHRYKEDVDNMAEMGVDAAYRFSVAWARIYPDGLEKGVNKEGVTYYNKLIDYLLEKGIKPYVTL  
YHWDLPQKLHDSFGGWTSQEIWKHFAAYAEFCFAAFGRVVKHWITFNEPLQFSLVGLYGLIHPGRCSDR  
RYCKAGDSATEPYLAGHNVLSHAAAARKIYREKFKALQGGVVGITVDAEWAEPMTDSVDDKVASQRRLEF  
QLGWFLDPFFFGDYPATMREYVGDRLPKFTPEEQKSVRGSVEFVGINHYSSRFVTPALYAKPSDNYHQDQ  
RILTSAVRNGAVIGDKAASPWLIVPWGLHRVLKVVSEYRNPPIYVTENGMDENNSTLTLDEQLDDLK  
RIHFYQDYLTAVLQATREGMDIRGYFAWSLVDNFEWAMGYTKRFGLYYVDYETLKRYPKRSARWFKRFLS  
NSIKQEV\*

>Selmo1\_268527\_estExt\_fgenesh1\_pm.C\_510048

MQRFLAIFAALWFLSAGAALGIGGGHKKHRINRCSFPKGFVFGTASASYQYEGAVKEDGRKPSIWDTF  
HTPGKIKEKNGDIAEDQYHRYREDIGLMKNMNDAYRFSISWSRIYPDGDTKNLNAAGVAHYNMLINS  
LHEGIQPYITLYHWDLPQTLSDVGGWLSQIVSNYAAAYAEACFAAFGRVVKHWITFNEPLSFTSGYAS  
GSGPPSRCTSCSKGNSTATEPYIAAHNVLLSHAAAADIRYKQYQPKQGGKIGITLNSNWYEPSTNSAADKE  
AAQRGLDFDLGWFLPIVSGDYPRSMRTSAGTRLPVFTPEQAAAIGSMDFLGLNHYSNYAKAGQVVP  
NQVTTYFQDSRVASSFENNGVAIGPKAASDWLYVVPWGFQKLVTYVAQRYNPVIITENGKSSALSQF  
LSRPQSLGKAGVDEFNDPSRSLKQSLRDTTRVKYYSYISNLLQAIRSKADVRYFAWSLLDNFEWNDGY  
SVRFGLFVDFNNLKRYPKHSALWFKRFLNQTCA\*

>Selmo1\_408050\_fgenesh2\_pg.C\_scaffold\_8000076

MRFSERFHRRFSIGVPGNIADGSSPNITDDQYHHYKDDVLLKNLGMDSYRFSISWPRVFDHGRVNP  
IAYNNLIDALLEHGKIQLMRRIVFIRLALFTFRQESSLLRSITGNLDDKFGGWLSRDIVDEYLRFAD  
FCFQAFGDRVKNWITFNEPHQLVNGGYVQGYAPGRCTGCPQKGSSTEPYIVGHHLLLAHAKAVLRYR  
YKVNQRGVIGMIDFSWFYEPYSSLLRDIAAARRALDFELGWYLTIFGDYPSMRLYVGDRLPAFTVEESR  
DLRNSMDFVGLNHYSRYTQDNPSNSVRPGYESDSHTHFLTERNGISIGGTTGTWYVVPWGLYNILNH  
VKENYNNPIFITENGLVILVTGFLRSNFPGLVDVADSNTFSDFIKDDARVQFYESYLTRLQQAANG  
VDVRGYAWWSLLDNWEWDSGFSQRFGLYYVDYSAL\*

>Selmo1\_419452\_fgenesh2\_pg.C\_scaffold\_42000152

MREENSALSILDQAHSQGFFTDLVPNARARILGGRSINGGFMTRAPKSEIDRIVGLDDYAVQVNASYEW  
LENGIASLPRTPPECAASSWNIVRVIPATFMLQYEGAIEGGRGPSIWDVYAHTPGKVMMDGTPGDVAV  
DQYHRYKVLQALSGLALLVTVNKQEDVGLMVLTDFFSPDLGFSFLNLKESIVLIALIFTGMMIQLMSK

HASERLEIVCSSEVSNCSAGNSSGEPYIVGRHLLSHASAVKIYREKYQEKGAGIITLDAQFSLIYQR  
IKLQLGEPWTSILDDTRNDHLILQNVNGFYVFPGMTRLLNLNGGSDGRGYFVWSLLGNFEWTRGLSVK  
GLYHVEYGKDLQRIPTLSKRKIEVTAIRIQL\*

>Selmo1\_73365\_e\_gw1.0.497.1

MGLLLCNAAFFLLAWLTISARADQTGLSRCDFPEDFIFGASASAFQYEGAVDEGGRKPSIWDIFAANPRN  
IADGSSPNITDDQYHHYRDDVLLLKNLGMDSYRFSISWTRVFHDGRVNPEGVAYYNNLIDALLEHGKIPF  
VTIYHWDLPQTLQDKFQWLSRDIYDEYLRFADICFQAFGDRVKNWLTTFNEPHQLVNGGYPLDSFWYEPY  
SSLPRDIAAARRALDFELGWFLHPITFGDYPQSMRLYVGDRLPAFTVEESRDLRNSMDFVGLNHYSRYT  
QDNPWPSNVRPGYESDSTHFLTERNGISGGTTGTWLYVVPWGLYNILNHVKENYNNPPIITENGLVD  
VADSNFSDRFIKDDARVQFYESYLSLQQAIAPRTGVDVVRGYAWSLLDNWEWDSGFSQRFGLYYVDYT  
TLKRYPKHSALWFKQFLSNTKCSGKFSVFLQLT\*

>Selmo1\_75234\_e\_gw1.0.2153.1

MPMDRLLILAMIAGIACAALNRCDPQGFVFGTASAAQYEGAVAEGGRRPSIWDTFSTPGKIIDGNSG  
DVTDDQYHLYQDDVLLMKNMSMDAYRFSISWSRILPDLKASAVNPEGIAYNNRILIDALLKQGIQPYVTLY  
HWDLPQALEDLGGWLNSSITDKFSAAYAEACFNAGFDRVKNWITFNEPHNFVVTGYDLGVEAPGRCSILGC  
LRGNSATEPYIVAHNVLLSHAAAADVYRKKFQSTQKKGIGITLDAKWYEPISNSTEHTSAAQRALDFELG  
WFLDPMFQDYPYVMRENVDRLPNFTNEERSRVLHSMDFLGLNHYTTFNPFIPFNLSRVYVMDARVI  
GSGKVSCKCFHCNIFPSWQGFASFWLYVVPWGIKIVNYIKERYNNPTIITENGVDQNNLLSSKETLKD  
IRVNFHADYLSNLLLAIRDGADVRGYFAWSLLDNWEWTSGFTSRFGLYVVDYKNELKRYPKNSVWFSNF  
LNISC\*

>Selmo1\_76384\_e\_gw1.1.805.1

MDLRLPLLAVLLKYVLAFTLENGAAPLSRSFDPGFVFGTASAAQYEGAFQEGGRKPSIWDTFSSHSA  
GKIKDGSNGDIAVDQYHRFKDDTKLMDMNDMAYRFSISWSRAFPDDKVNPEGIAYNSIISLQKAGIE  
PYITLYHWDLPALHLSGGWLNSSISEKYAAAYAEACFEAFGDRVKNWMTFNEPYTFATRQYSEGAPGR  
CYGCKFGGNSLTPYIVTHNVLLSHAAA VKIYREKQFQKGGKIGIALDTHWFEPFSDSPEDAAAERRL  
DTGLGWFLSPIMFGKYNRSMRHLGPRLPVFTSKQRREIRGSIDFMGLNHYSRYVQDDPAAAAATNSEMD  
PAALSLGNRNGVLIGPQAGSKWL YVVPWGMKLLKYIKARYNPPEIFITENGSCHFLLAIKLDLNDP  
LEQALQDQLRIDYNEYLKYLMAAMRDGVNVRAFYFAWSFSDNFWEIGYTSRFGIYVVDYSDNLKRYPK  
SALWFKQMLARNASATQIL\*

>Selmo1\_76748\_e\_gw1.1.338.1

MRSIGSILARLLVCGFLIFGDGSLSDGARVAPLLRVSDGILLQDGISSQERLGRCDPQGFVFGVSSAY  
QYEGAAAEGGRQPSIWDTFSTQGGKIQDGTGLDANDQYHRFREDVGLIKNMGMDAYRFSISWSRFFIDG  
SVNVEGQAYYALIDELLASAGIEPYVTLNHFDLPQALDGSNGWLNSSIVDIFAAAYAEACFDAGDRVKT  
WITFNEPQLFSLKAYSEGSHAPGRCSSCSNGNSLTPYIVGHNMLLSHAAA VRIYKHKFQARQGGKIGIT  
LNSYWFEPFNSKMDIEASKRSLDFELGWYVSPVLSGNYPERMTRLGPRLPVFTEEQRQAVKSSIDFLG  
LNHYTRYVQDMPAVTPANTANGDSQVLLVARNVEIGPKSASSWL YVVPWGIEKLLLYVKDHYNPPEI  
IITENGMDANDPSAPLEQSLQDHNRIKFYQSYLKYLLQAVKKGVNVRGYLAWTLLDDFEWRFQYMQRFQ  
LHFVDFKDNMRRYPKLSLWFKQMLKDRNCESSKAL\*

>Selmo1\_88863\_e\_gw1.9.181.1

MQDVLRSYSPKGFVFGAASASYQVEGATKEDGRKPSNWDVYSQIPGKIADGSTADPAIDQYHRYKEDFS  
ILDGLGADAYRLSIDWPRMLPDGTGSVNPKAISHYNDVIDTLLAKGLKPYVTLFHWDPYALEKSYGGFL  
SSKIVDDDFGVFEACFKAFGDRVKNWITLNEPHIFAVIGYNYGVFAPGRCSPEIGNCTGGDSSMEPYVVG  
HLLLAHAKAIEIYTKRYKASQKGTIGLTLDTLWYEPVSNKQDKAAAERARQFNLQWMLHPVYGEYPP  
ALVANVGSRLPKFTAEEKKWLQGTSDFIGINHYFSLYVKDNPNTFVGLMDSHSSSLVRLLDKLLKKG  
LIGRNINGFYVVPYGIIRLMNYIKDKYRNPIITENGISDSTNSPLAQQLDDQPRINYKYTLASNLA  
ASIRDGCRVQAYFLWSFLDSWEWGSYVNRFGIIVVELDNLKRIKPKSAKWYAKFLKKKH\*

>Selmo1\_98083\_e\_gw1.20.651.1

MSSARRSLILDVNSPSSPSSSEGGPPGIVAEYDEVRRVDFPDFTFGTATSAYQVEGASKKGGRLSIW  
DVFCNVPGRIADGRNGYKSVQYHXYKEDVNLMSMGMAAYRFSISWSRIIPDGMGGTSCSVNEKGVY  
NHLIDKLLSKGLEPFVTLYHWDLPQRIHDDAPIVGGWINPRVVDYFAGYAEICFARFGRVKKWITLNEP  
AQFCVNGYGTGVHAPGRCSDKSRSPAGDSAVEPYLA VHHALLAHAAA VEIYRKKFQSEGGVIGLACDGE  
WSEPFTEPEDQQAQRRIEFQLGWLLDPIFFGDYPECMRQNVGDRLPRTFAEISSLRSLDYIGINH  
TSRYVKAAPAKVTPVNYFTDQAVVTATESKMGVPIGERAAEWLYMVPWGMKFLNWTDRYNRPIIF  
ITENGMDDQDDKTIPLPERLHDTKRIRYHQGYMAAVVRAMRKGADVRGYFVWSLVDNFEWSQGYTKKFLG  
FFVDQEDLDLKRQPKASVLFWFTLLMSQSKTLEAEPLKAVKWLRRLSVAEDSATPKSQSPASSRSGSRAP  
SPKPAKRSSQIHPVKVTR\*

>Chlre3|169029|fgenes2\_pg.C\_scaffold\_9000168

MTGSGKPAANKATANGDGEVRFVFLKGAASVWQNSGDDSNWTRFAKSRWPFVSGVSAIRGKYNDKCS  
DFWNNYERDIKLAADIGSTFRFSIEWARIEPLRGVDFDMEAVHRYHQMLDCMAAHGLVPNATLWHFVHPT  
WFEQAGYDITKEENIPAFVRFVSKCFEWFKDKITLWATFNEPTCYMFLAFIVGIAPPGRIMDLVTAGRMLS  
TMLKAHTATYRAIKAAPGGQAAQVGLVSHHITFEPQGTGILYGVSKVLSDWMTYWWGWDVVHHWMLTGEF  
VVKLPVLGVWQRWQDPAGRPDWWGINYYSRGIFSWYLAAPSCRECFEFGIPMYITETGIADARDDRRAL  
MDSYMKATLRAVAEGCDVRGLYYWTLDDNLEWATGYTMKFLYAWEPDGSVDRKLLKARAGASGDRNRLA  
RTCYNAHKHDSQSPANKHDELMSLLDTAFQELVQERPVLGIEPGVDSMEIGKAYRVKYYEHRFNPEMLQK  
VESAHSTIMLSQLSARMKKGKGVNKDVAADQEPFPWRPKRWDATPKVIMVIGAMQLGMVAYGFQPPALS  
KTIFCGLIGIAANVMKQNAIMPDPPEMATEEESGRASRNFVRGFLGALATIAGTLLFSIPEVLVSQA  
KMTLPVIGVNVIVSMKILGAALFNWVMTSFY\*

>Chlre3|167861|fgenes2\_pg.C\_scaffold\_6000306  
MTSMQKDGAGDVCRLSLKGAISVWQNSFDEASNWTAFAVKPHSLAERFRGKDPQLRLDTCDFWNRHYE  
DIQCCRLLSGLSRLSLEWRSRVPNGPQVDEAAVQRYNDILDACEGAGLVPMLTLHHFTHPQWFQQLGG  
FEEEGNIRYFTEWLAVTAFKLFRRHMKLVATFNEPTCAAFYIAGIHAPGRRGDIATAGRVLHKLRAHS  
AAAYAAIKSQEGGGDVRVGLVHQITFEPEGTGALYSASRWTAEWLTHCFGWDVVHDYLMTRGFAWRIPGG  
RPGHLEVEQPSGRPHVDWLGINYYTRVVDWRLGFTCRPGEVLTDMGWVWVPEGLYAAIVHCAELGPLY  
ITETGLADGADDRAPLISAYWQVARAVADGYDVRGFFYWTLDVNYEWHLGYNMNPLAGASATIVSVTS  
PSTPKWLHADGDGEEQLQAACRRLAGSLHACAGTGAASALSSAQVAAAEACASASCASVSGCRRRLRRGS  
LELVRFTATPDELGAQAASLRDTSWPPQELPQELRRPYSSGGVGVGGVLSGMVVGAVGLLALRPVGRA  
LRSVGRVALSALYVPLLVGAAWRRAPRVGYGGVSPAAGAAAGRAGGSAGAVLLVMDEVPHGVEGTAV\*

>Volca1|107029|estExt\_fgenes4\_pg.C\_560084  
MNLHGAGAVMNGDNDSTNELTEKIRFLKGTASVWQNSGDGGSNWTRFANSLWPFYRFGVKAIRGKYNI  
DACSDFWNNYERDIKLAADIGSTTLRFSEWARIEPQRGVIDMEAVRRYHQMLDCMEAHGLEPNATLWHF  
VHPTWFEDAGGFTREENIPAFVEYSKRCEWFGSRIRLWATFNEPTCYMFLGFIVGIAPPGRIFDLAGAG  
RMLSTMLKAHVEAYRAIKAMPGGDKAQVGLVSHHITFEAEADGILHGVAKMLSDWMTYVWGWVVEHWM  
TGEFVWKLPLVGVWQWKDPAGKPPCDWGWGINYYSRGIFSWYLLPSCRHQEVMTDMYYPYIPEGMYRAIK  
RCSEFGIPMYITETGIADSRDDRRAIMIDAYFKEVMRAVAEGYDVRGFFYWTLDNLEWATGYTMKFGLY  
SWEPDGSVDRKLVKVEGGARGRFGSMGGFSGSKTLIRYFRTPDDLAVREAAQKAQAVLGADMGVEEE  
LEEEGFVRMGPDKMMPGGKGRGDRGEVEMGKGVGLLAIG\*

>Volca1|96948|fgenes4\_pg.C\_scaffold\_5600086  
MNDTPPAAPISPTTANGPTSCVSEQTRTPQNELNGPPSNLSPPPATAPTTQNDLRYRFLKGVGISVW  
QCSGDLGSNWTRFARGRWPLRHFGVRAVRGGVMEKANGFVDRYEEDIKLAADLGCSTFRFSLEWARIEP  
ERGVIDMEAVRRRVVGLLTARADAGLRGVMVLMVMMMLDAVARVCVGNVAFWYHQMLDCMEAHGLEPNATL  
WHFVHPTWFEDAGGFTREENIPAFVEYSKRCEWFGSRIRLWATFNEPTCYLLGWIIISPPGHFMNVA  
GAGRMLSTMLKAHVEAYRAIKAMPGGDKAQVGLVNHHTFEAEADGILHGVAKVVAEWMTYVWGCNMEH  
WMLTGEFVWVVPVGLVWKRWRDPAGKPPCDWGWGINYYSRGVVSWCLTPTHRQEVMTDMYYPYIPEGMYR  
AIKRCSEFGIPMYITETGIADSRDDRRAIMIEAYLQVVLHAIADGCDVRGVYWTLDLEWATGYTMKF  
GLYSWEPDGSVDRKLVKVEGSIKALQLYHRLPALRRVARERIMAQELERVSHGGR\*

>ChlNC64A\_1|145286|IGS.gm\_9\_00093  
MQNINGFSAITLSLSALSISTCEDGRRRRKDPVCCNTHQSQRGDQFKEASNWGFERQRTWLLQPTIYNG  
DRCGASCDFWNRYEEDLERAAALGSNCFRISLEWHRIEPARGQVDMEAVQRYNKIFDCMHSGKLEPHVTL  
HHFVHPAWFERLGGFTKEGVTSFAGHIYGSFPGRIGQVAGCARQMLMLRSHAQAYEVVKAMPGGKEAQ  
IGIVWNYWFPEKRSWTPFYVPWVSRLTRMVGNDMFMQYMQTGEFDWNPWPVFSRVHYKEPGRGPGC  
DFLGLNYSRGVMDVSPCCNLGEVMTDMPYALYAEGLVLAHHMSKLGVPYIYITETGVADYGDERRPL  
MLQSYMELQVERAVQMGYDLRGIMYWTLDNFEWGFSGMRFGVYKWEENDGSQKREAHSSVSLQKWYERL  
PQRVTELLRLRRQEQADGGMAAPALAAA\*

## UGT84B1-UGT84B2-UGT74B1

>AGD2\_AT4G33680  
MSSTHQLVSSMISSSSSTFLAPSNFNLRTRNACLPMAKRVNTCKCVATPQEKIEYKTKVS  
RNSNMSKLAQAGYLFPEIARRRSALHLKYDPAQVISLIGGDTTEPIPEVITSAMAKKAHEL  
STIEGYSYGAEQGAKPLRAAIAKTFYGGGIGDDDDVFSVSDGAKCDISRLQVMFGSNVTI  
AVQDPSYPAYVDSSVIMGQTGFQNTDVQKYGNIEYMRCTPENGFFPDLSTVGRTDIIFC  
SPNNPTGAAATREQLTQLVEFAKKNISIIYDSAYAMYMSDDNPRSIFEPGAEVAMET  
ASFYSKYAGFTGVRLGWTVIPKLLYSDFPVAKDFNRIICTCFNGASNISQAGALACLTP  
EGLEAMHKVIGFYKENTNIIIDTFTSLGYDVGKKNAPYVWVHFPNQSSWDVFAEILEKT  
HVVTTPGSGFGPGGEGFVRVSAFGHRENILEACRRFKQLYK-

>ATUGT85A5\_AT1G22370  
MASHAVTSGQKPHVVCIPFPAQGHINPMLKVAKLLYARGFHVTFVNTNYNHNRLIRSRGPNSLDGLPSFR  
VESIPDGLPEENKDVMDQVPTLCESTMKNCLAPFKELLRRINTTKDVPVSCIVSDGVMSFTLDAEELG  
VPDVLFWTPSACGFLAYLHFYRFIEKGLSPIKDESSLDTKINWIPSMKNLGLKDIPSIFIRATNTEDIMLN  
FFVHEADRAKRASAIILNTFDSLEHDVVRISIQSIIPQVYITIGPLHLFVNRDIDEESDIGQIGTNMREEM  
ECLDWLDTKSPNSVYVNFSGSITVMSAKQLVEFAWGLAATKKDFLWVIRPDLVAGDVPMPLPPDFLIETAN  
RRMLASWCPQEKVLSHPAVGGFLTHSGWNTLESLSGGVPMVCWPFPAEQQTNCKYCCDEWEVGMIEGGD  
VRREEVEELVRELMDGDKGKMRQKAEWQRLAEEATKPIYGSELNFMVVDKVLGGE-

>UGT74B1\_AT1G24100  
MAETTPKVKGHVILPYPVQGHNLPMVQFAKRLVSKNVKVTIATTTTYASSITPPLSVEPISDGFDFIP  
IGIPGFSVDTYSESETLTLIEKFKSTSDPIDCLYDSFLPWGLEVARSMELSAASFFTNNTLV  
CSVLRKFSNGDFPLPADPNSAPFRIRGLPSLSYDELPSFVGRHWLTHPEHGRVLLNQFPNHENADWLFVN  
GFEGLEETQDCENGESDAMKATLIGMIPSAYLDDRMEDDKDYGASLLKPISKECMEWLETKQAQSVAFV  
SFGSFGILFEKQLAEVAIALQESDLNFWVIKAEHIAKLPFVVESTKDRALLVSWCNQLEVLAHESIGC  
FLTHCGWNTLEGLSLGVPMVGVPPQWSDQMNDAKFVEEVWVGYRAKEEAGEVIVKSEELVRCLKGVMEG  
ESSVKIRESSKKWKDLAVKAMSEGGSSDRSINEFIESLKG-

>AT2G23210  
MGSIEGQETHVLMVALPFQGHNLPMKFAKHLARTNLHFTLATIESARDLLSSTDEPHSLVDLVFFSDGL  
PKDDPRDHEPLTESLRKVGANNFSKIIEGKRFDICISVFPFPWVPAVAAAHNIPCAILWIEACAGFSVYY  
RYYMKTNSFPDLEPNQKVELPGLPFLEVRDLPTLMLPSHGAIFFNLMAEFVECLKDVKWLANSFYELE

SVIIISMFDLKPPIIGPLVSPFLLGADEDKILDGKSLDMWKADDDYCMEWLDKQVRRSSVFTYLSEAYSNH  
QRIKSRP

>UGT84B2\_AT2G23250

MVALAFQGHLPMLKFAKHLARTNLHFTLATTEQARDLLSSTADEPHRPVDLAFSDGLPKDDPRDPDTL  
AKSLKKGAKNLSKIIIEKRFDIISVPFTPWPVPAVAAAHNIPCAILWIQACGAFSVYYRYMKTNPFPD  
LEDLNQTVELPALPLEVRDLPSLMLPSQGANVNTLMAEFADCLKDVKWWLVNSFYELESEHIESMSDLK  
PIIPGPLVSPFLLGNDEEKTLDMWKVDYDCMEWLDKQARSSVYISFGSILKLENQVETIATALKNRG  
VPFLWVIRPKEKGENVQVLQEMVKEGKGVVTEWQQEKILSHMAISCFITHCGWNSTIETVVTGVPVVA  
PTWIDQPLDARLLVDVFGIGVRMKNDAIDGELKVAEVERCIEAVTEGPAAADMRRRATELKAARSAMSP  
GGSSAQNLDSFISDIPIT-

>UGT84B1\_AT2G23260

MGSSEGEETHVLMVTLFQGHINPMLKLAHLSLSSKNLHINLATIESARDLLSTVEKPRYPVDLVFFSD  
GLPKEDPKAPETLLKSLNKVGAAMNLSKIIIEKRYSCIISSPFTPWPVPAVAAASHNISCALWIQACGAYS  
YRYRYMKTNSFPDLEDLNQTVELPALPLEVRDLPSFMLPSGGAHFYNLMAEFADCLRYVYKWWLVNSFY  
LESEHIESMADLKPVIPIGPLVSPFLLGDGEEETLDGKNLDFCKSDCCMEWLDKQARSSVYISFGSML  
ETLENQVETIAKALKNRGLPFLWVIRPKEKAQNVAVLQEMVKEGQGVVLEWSPQEKILSHEAISCFVTHC  
GWNSTMETVAVGVPVVAAYPSWTDQPIDARLLVDVFGIGVRMRNDSVDGELKVEEVERCIEAVTEGPA  
AVDIRRAAELKRVARLALAPGSSSTRNLDLFISSDITIA-

>AT2G43840

MEKMRGHVLAVPFSPQGHITPIRQFCRKLHSGFKTTHLTTFIFNTIHLDPSSPISIATISDGYDQGGF  
SSAGSVPEYLQNFKTFGSKTVADIIRKHQSTDNPTICIVYDSFMPWALDLAMDFGLAAAPFTQSCAVNY  
INLYSYINNGSLTLPIKDLPLELQDLPTFVPTGSHLAYFEMVLQFTNFADKADFLVNSFHDLDLHVK  
ELLSKVCVLTIGPTVPSMYLDQKIKSDNDYDLNLFDLKEAALCTDWLDRPEGSVYVIAFGSMAKLSSE  
QMEEIASAINFSYLWVVRASEESKLPFGFLETVDKDKSLVLKWSPLQVLNKAIGCFMTHCGWNSTME  
GLSLGVPVAMPQWTDQPMNAKIYQDVVKVGVVRVKAEEKESGICKREEIEFSIKEVMEGEKSKEMKENAG  
WRDLAVKSLSEGGSTININEFVSKIQIK

>AT3G21560

MELESSPPLPHVMLVSPFQGHVNPMLLRLGKLLASKGLLITFVTTESWGKMRISNKIQDRVLKPVGKG  
YLRDYDFDDGLPEDDEASRTNLTLRPHLELVGKREIKNLVKRYKEVTKQPVTCINNPVFSWVCDVAED  
LQIPCAVLWVQSCACLAAYYYYHHNLVDFPTKTEPEIDVQISGMPLLKHDEIPSIHPSPPHSALREVII  
DQIKRLHKTFSIFIDTFNSLEKDIIDHMSTLSLPGVIRPLGPLYKMAKTVAAYDVVKVNISEPTDCMEWL  
DSQPVSVVYISFGTVAYLKQEIDEIAYGVLNADVTFLLWVIRQQELGFNKEKHVLPPEEVKGGKIVIEWC  
SREKVLSHPSVACFVTHCGWNSTMEA VSSGVPVCFPQWGDQVTDVAVMIDVWKTGVRLSRGEAERLVP  
REEVAERLREVTKGEKAIELKKNALKWKEEAEEAVARGGSSDRNLEKFEKLGAKPVGKVNQNGSHNHVLA  
GSIKSF

>AT4G15480

MGSISEMVFTCPSPNPIHVMLVSPFQGHVNPMLLRLGKLIASKGLLVTFVTTELWGKMRQANKIVDGE  
LKPVGSGSIRFEFFDEEWAEDDDRRADFSLYIAHLESVGIRESKLVRRYEEANEPVSCINNPFPWPVC  
HVAEEFNIPCAVLWVQSCACFSAAYHYQDGSVSPFTEPELQVCLPCVPVKNDEIPSLHPSRFTGF  
RQAILGQFKNLSKSFVCLIDSFDSLEQVIDYMSSLCVPKTVGPLFKVARTVTSVSDVGDICKSTDKCLEW  
LDSRPKSSVVYISFGTVAYLKQEIEIAHGVLKSGLSFLWVIRPPHDLKVETHVLPQELKESSAKGKG  
MIVDWCPEQVLSHPSVACFVTHCGWNSTMESLSSGVPVCCPQWGDQVTDVAVLIDVFKTGVRLGRGAT  
EERVPREEVAEKLEATVGEKAEELRKNALKWKAEEAAVAPGGSSDKNFREFVEKLGAGVTKTKDNGY

>AT4G15490

MDPSRHTHVMLVSPFQGHVNPMLLRLGKLIASKGLLVTFVTTEKWPWGKMRQANKIQDGVLPVGLGFIR  
FEFFSDGFADDEKRFDFDAFRPHLEAVGKQEIKNLVKRYNKEPVTCLINNAFVPWVCDVAEELHPSAV  
LWVQSCACLAAYYYYHHRLVKFPTKTEPDISVEIPCLPLKHDEIPSLHPSPPYTAFGDIILDQLKRFE  
NHKSYLFIDTFRELEKDIMHMSQLCPQAIISVPGPLFKMAQTLSSDVKGDISEPASDCMEWLDREPS  
SVVYISFGTIANLQEQMEEIAHGVLSSGLSVLWVVRPPMEGTFVEPHVLPRELEEKGKIVIEWCQERVL  
AHPAIAACFLSHCGWNSTMEALTAGVPVCFPQWGDQVTDVAVLADVFKTGVRLGRGAAEEMIVSREVVAE  
KLEATVGEKAVELRENARRWKAEEAAVADGGSSDMNFKEFVDKLVTKHVTREDNGEH

>AT4G15500

MEMESSLPHVMLVSPFQGHISPLRLGKIIASKGLIVTFVTTEEPLGKMRQANNIQDGVLPVGLGFL  
RFEFFEDGFYKEDFDLLQKSLEVSGKREIKNLVKYKQPVRCINNAFVPWVCDIAEELQIPSAVLWV  
QSCACLAAYYYYHHQLVKFPTETEPEITVDVPFKPLTLKHDEIPSLHPSPLSSIGGTILEQIKRLHKP  
FSVLIETFQELEKDTIDHMSQLCPQVNFNPIGPLFTMAKTIRSDIKGDISKPDSDCIEWLDSREPSVVY  
ISFGTLAFLKQNQIDEIAHGILNSGLSCLWVLRPPLEGLAIEPHVLPLELEEKGKIVIEWCQEKVLAHPA  
VACFLSHCGWNSTMEALTSVGPVICFPQWGDQVTDVAVMIDVFKTGLRLSRGASDERIVREEVAERLLE  
ATVGEKAVELRENARRWKEEAESAAYGGTSEFNQEFVDKLVDTMTNINNVV

>ChINC64A\_1\_134126\_IGS.gm\_10\_00417

MVLPDFHDNLEGGKLLGGLETVVYKSPDINEQFEFVAVYTSHFQMCRRHLLDNGAALNALRGMVLDL  
LLIDVAYHCLGAVAEELLQKRVLNPNMDIVDPFLSRVGGVPHSLAVHAAMGSLVHPMLVGLLGGGEAK  
PLVADLSAILEGAGPRVVYVSGTTFRPPSCDVVLGLAAALSANVTTVIWAVDLAHLVPGCLDVASLP  
PSIHVMRVPQDDLLSHPQLRAFLSHAGVNSLNQAAAYRGKPMVAVKGGWGLHFKKGDLSPSTAHKLAAMLE  
QAAAKDSPLAQRAAVVSGMLNAHPRPAVELAADWIEYALALPPDADLSDPAVAMPHWKRYCLDVYAVAAV  
AVAAVLGVAALYHGTPIAICCEFGA\*

>ChlNC64A\_1\_134998\_IGS.gm\_12\_00384

MPTVLFVCLPLEGHLRVPVTNVAQVRLGVDFEFAALEPSRATVESMGVPPFVSLGSAERKTSKMGFAERV  
GDTSTPPVPLDQFVDKAGANFAGWEEAVYPLLQAHMDRAGGRYAAIVSDQATMAAHDAAVAGLPLVSLY  
QLPLSYSLVMGGHNEYNMPRSVPVLEPCCVLEAMTWLQYAFNPNALKRRGAAQITAAAYGRHRAAARERL  
GLPPLPSSGPFQPPGIPRSITIVGGMELETERPLPGWHMSGPQVLPVTPAPPVLDGDKDAEVA AFL  
RAAQDAGEPVVYVALGSLVTPHEALVHMAAAAFQAAPGARFLWALRQASHAFLPPDLAPPAGAGGKVLV  
VSWAAQTAVLAHPAVKLFVTHGGLGSLSEGLAAGKPLVALPFFADQHVNAHHLANRKLGTVDASPAAVG  
SLARRLSKAIGELLGDAGTAQRAAQLGEKLRSCNGAEVAARRIAQFVGEAAGGGAAEVGDTSAE\*

>ChlNC64A\_1\_140490\_IGS.gm\_3\_00229

MVLPDFDAVNLESKRLLDAGLETVVFQTPPQSNDFEASGRFIALHTGHFESMCRHLLGDSAAMEALRGL  
DADLLFLDVAFFCGQAISELLGKRVVLFSPDIVDPFWSRFGRLPYSPAVHAALGSGLVHPMTWRERATN  
ALLSPLMFWLGSSVARASAQRIARDFGLPGAGDPRDAFRGSRLLL VNAADGLVGP LLVGGEPKPLPADLA  
AILEGAGPRGAVVYVSFGTTFRPSDCDVVRGLAAALSALNRTVIWGLNPARLPAACPLDVSILPASIHIME  
WVPQADLLGHAQIKTFLSHAGVNSIYEAPYRGKPLVCMPLAADQFDGCAKAVKGGWGLQFKKEELSPATA  
HRLTARLEQASAEGLSPLAQRAAVVGAMLK AHSRPALELAADWVEYALALPQDADLSDPAMAMP MWKRYCL  
DVYAAAAAVAVLGSATLVLRAGGRMVWRWLTAGRRSHGKTE\*

>ChlNC64A\_1\_57900\_estExt\_fgenes3\_pg.C\_100197

MSLAQAALLLLAAGSVVGGHRHPTLAIVMLPGGQSHAFQGLAIARSMRGRGWRTAMVLPDFDHDNLEGGK  
LLGGGLETVVFKTPPYTNKRFEEMLKQEELMELKTNLHEFVAMHARHFEQMCRHLLDDGAAMDALRGLD  
ADMILLDVLFSCGEAIAELLQTRVMLLDVDPDIVDPFMSKLD RFPYSLAVHAAMGSGLVHPMLVGP LLGGG  
EAKPLPADLSAILEGAGPRGVVYVSFGTTFRPSDCDVVHGLAAALS AVNTTIVAVDLAHLVPGCPDLVA  
SLPPSIHV MRWVPPQDLLSHPQLRAFLSHAGVNSIYEARRGKPMVCMPLAGDQYDGC AKAVKGGWGLQF  
KKGDLSPSTAHKLAAMELQQA AAKDSPAQRRAAVVSGMLNAHPRPAMELAADWIEYALALPPDADLSDPAV  
AMPHWKRYCLDVYAVAAVAVAVLGVAAALVLR LAWRLMGLRVKHGKME\*

>Chlre3\_142823\_Chltre2\_kg.scaffold\_6000313

MREFHVFLNGLAKTHKLGPGSFDVITDFLTSAGHDYAEYIGAPLVFNLSLYIAFESRMMAVPPALLM  
PVMPIMLPYKMDFAAAVQNTLMTLLFEAKPCRTFLDIMDECALGGLVPGSFRQSLTRRPQPLLLIPAAP  
GFEPVALPHVVRVVGGM LFESGPM SDKIREYLES DPGTPVIYVGFSGFVDFPDPTYALILRALGRV PAR  
VLWSLKPKSAPSMAAIANGTAPANVRVEPVWVQQLAVLRHPAVKAVVTHGGFSSVSEIMYV GKPMVAIPG  
FGDNEHNAWKLQQLGAAVQLSKE SPQLEQLVEAVNKVLTDP SYTAAARRLGLVTRTAPGAPHAALVEQ  
VAALGSTQHLSSPDNTGVVAAATATLAAVPLVLAALVLVCLARCLGGSGRRRVMKAKPE\*

>Chlvu1\_27740\_e\_gw1.5.383.1

MRWLGLTCLWLLVAVPHGFCARVLSIVLPGPQSHLFGMKKVAEAVAARGHTVKVCIRNCLEAFMEGAGDN  
GVLLVAMGTVATLGLKERQAMAAFAKLPVRVLRWLSKSEVPDESAIADLHLGNNTKVATWLPQNDVLGH  
PRTKAFLSHCGVNGLYEAAHYGVPIVALPFFADQPANADKAVARVRQLYRHLHVVYQMLRRAIHTAIIC  
CAVHSLL\*

>Clvu1\_36718\_estExt\_Genewise1.C\_50457

MAAAFAQLPVRVLRWLSKSEVPDESSIAELNLGNNTKVATWLPQNDVLGHPRTRAFLSHCGANSLYEAA Y  
HGVPIAALPFFGDQPGNAGQAVARGMAVVRHSDIGTEAFPAALAE LLNGSYAAAARSISV KLRAR KRT  
PVQEAVDWIEHALATGGKAYLRTPEHDLPLFVLSLDVVAIFL VSAALVIYIFS KLTQLIAYALSRL EN  
GAACKAA\*

>Chlvu1\_43304\_estExt\_Genewise1Plus.C\_100284

MNLREIAEELAQQR AHHTYVTTNLDMSPLQPTNNTILSYNIHG MADTETLSDWVLSKNTSAGVASSFM  
VIINQACLGLMSNETALTQLKDFRADVMLAEIQNPCTALLAHVLDLPVWNHWPLAPIEHDFDQRP SRSTI  
HLLCFWGR LKSLFAHQNLGK VWRMHSSTGEWTCTALLCISPCMQLRKKYDFN PYAAEERRRMVLSMSP  
VDWAAEWLRPMSPSYKYVGPVLAGPGKALPADFEAFMTGAGDQGVLLASMG TMAELDQEELASMAAAFA T  
LPCKVLRWLTPEAPDAAAVALNLGNNTVWVMRVPQNDVLAHPNLRAFLSHVGINSMYEA IYHGKPVV G  
MPLFGDQPSNADR VVAKGFGVRLSPDQAGTPAFKEALMEVLTNPKYTA AARAMSVKIRARKNTPVQE AAD  
VVEHVIA TKGEPY LKIPED EMSFIARNFLDVY AIIAACCLCPVMAAWAVLALL\*

>Chlvu1\_44652\_estExt\_Genewise1Plus.C\_170076

MKYCELFLEDGEAAA VMKEFDADVLLGDVAYACAMQSELLRRGDPRGR LPRVMVSALPILDPLVPRME  
NMPNNLAYVPQLGTSLSNRMTFLQRVKNLAFYCGSLLGEQLRALPLYTR LGTVHGV DCLATSTVHGSAMF  
LYNMDFA MEWPRPLPTVQLVGALLPAAKPLPPAFQALLEEAGPEGAVYASMG T LCNFGAGEFVEIARA  
LSALPNLVIWK LAPGDLPGNATV ASLNLNPNVKVVDWTPQNDLLGDPRVRAFVTHGGLNSIYEAA YHGIP  
VVGLPVFGDQPDNVMKAVYRFGFLMIPP GTITADSLAAALRVM AEPSFREARKVSLRMR AHR LTPAQK  
AADWVEHVMATGGDTY LKTPHELLPWHVRHMLDVYAFVAALLAGLLWLS CAGMRALFGGRPKQARLSGSA  
\*

>Chlvu1\_60059\_GG.C169\_S05\_00415

MKKIAEAVAARGHTVKFLVLDNNAHALQPTDVPVLTYSIPVVKGPFDPAA MKVKGAQNFVQTVADITRVF  
VSGCDGILSNDTLMAQLKDYNPELLLAETLSPCAQVLASKLDVFPVNFQMYAPIESVQTS AWRGSRNRAF  
TPNPLAYYFPQKDSGIETQHMSFPQRLHNFVA YWKFHAGDYWHVRPIVRS AFRRFVDPDAPKERRRMVMT  
MCIADFAIEWLRPLPSYK LIGAVLPEPAQPLPADLEEFMEGAGDDGVLLVAMGTIATLGKAEQRAMAAA  
FAKLPVRVLRWLSKSEVPDESAIAELKGNNTKVATWLPQNDVLGHPRTKAFLSHCGVNGLYEAA YHGVP  
IIALPFLAEQRENADKA VGRGLALRLNHEDLLTGQFSHTITRVL TERSFKEVAEKL SVKLRARPRTP TQE  
AADWIEHALATHGEAYLQTPDQDLSL FVRLSLDVWAACL VVIALVILVA AKLARLACAKLDDALHRVSI  
ANSKGGAAASYSSLPHTDGAETVINGAHVQSS\*

>Chlvu1\_72778\_fgeneshCV\_pg.C\_scaffold\_5000401  
MNQKSLFVALLALSCALSGPLSAMLVAPGDVPMKMTARDKGEEIAHMTFNHTHTADLEGVAAIPVRNHEEMM  
DKVLTIWHAQDCHALLSDADIMARLQGDKPDILGVPPFFCTTMLAAKLGVPYISLNPVSLVGNFSFMHPLW  
AGSGRDFHIGPRLSSVPEMFLEASYPLTFLQRMQNAWLYAKAQLHEYGTHRPMTKALQAKHGTDLASPEA  
RRLEMLHIVNSHMAEYQPRPLPPNVKLVGPIMAKPAAPLPPDLQEFVEDKAETQMIASALSRLPIRTIWK  
MSKQVEAAVGGDLALNLTNDNVKVVTVWVQNDVVGHPSTKAFLSHCGANGLNEAAYHGVVAVAMPFYGDQP  
MNARKLIGKGMVAVALQKRGLSAEGVYDAFTRVLTDESIRAAAAKVKRIRSRKRSSVQETADWVEHVLDSD  
DGEAYMQLPDDMSFFVRNSLDVAATFFGLGVVALIAGGLISAWVIGGAYRKLKGLAGWEKKMV\*

>Chlvu1\_81366\_estExt\_fgeneshCV\_pg.C\_20082  
MLLYQVVAQSDADAFKLDWSGMEIETYTAAYNQSDWRDQARKARFKDPIQGGLEAEFGADVLFQDWAY  
YCTPALSEMLKLPRVTVSNIPILDVHTTWRDSTGRRMHASNMLAYTPQVGTGFPSAMSFAQRVENVITY  
AVASLIDWVAFHRMIYKPMGARHGIDLGTPEALSRGVMHLFNVDFALEFPKLPNNVCLVGLPMPEPPKP  
LPADLEEFVGGSAEAGAVVYVSLGTVCISGAQEFRELAALSALPSRVIVKVGADDLPQGVSLASLGLADN  
VKWAPQNDVLGHSMRAFTHGGVNGLYEAAHYHGVPIAGIPLIADQKDNVAKAVHRGFGLAVDPHGCLTA  
ARIGGALRRLLEAPGFRAAAAKLSRRLRSRPRTPAQEAADWVQHVIDTEGEPYLPQTPEDTIPLASLLLLD  
VFAFFTVALAPLGIAWAVGSRLLAARRAPKAKAA\*

>Chlvu1\_82338\_estExt\_fgeneshCV\_pg.C\_50395  
MARLQGDKPDVIMGVPPFPCTSLAAKLGVPYIAINPSGLAGNAIMQPLWAGSGRDFHIAIPLASVPEFL  
FEATYPMFTFLQRMQNVLLYASAQMHGIMITRPMRMLKQAKHNLDLTTAESRRLHLLTIINGDMALDQPRP  
LPPSVKLVGPIMAKPAAPLPPDLQEFVEGAGAAGVVLISIGTITFGKEEIHAIASALGRLAVRALWKL  
EQVEAAAGGLESNLTDVSVKLVSWVQNDVVGHASTRAFSLHCGANGMNEAAYHGVVAVAMPFHGDQTLN  
ARKLITKARTHPNLSSALLAWVYFFGMAVLLQRKGLTADGVYNAFTRVLTDDSIIRAAAAKVKRIRNRK  
RTPVQETADWVEHVLDSSGDPYLPQPDNDMSFFVRNSLDVAAAYLIGVIVILIAKLLIAWVMMGGACRKL  
KGRAGVWKIV\*

>Phypa1\_1\_123741\_e\_gw1.46.36.1  
MTIGAEPSVEMASQPHVVVMPFPSKGHSTPFLHFAAKLTALGVTITFVNSYEHVQPPQDFQSIGGLEQMKV  
VKIGGPVLPDGDIAKPLPMAASERITQDLEDLLEKLVYTPGLRPAALICDVFVFGWTQDVADKFKIPKY  
LLFTSPSSLLALMSYVPTLLKLGRLPVGFPEFSDIPGVASLKAEMPSMMLDHSKSIPEAYAFFLRHCDRL  
PDARGVLVNTFEDLEHRTLECIIRIRIYAVYFEDNSKVSESNQEDTAEYKWLWDLQPEHSVLVISFGSFS  
LRANQVTLALNGYLMCFGTVAMLSDEQIRQMAIALENSGQRFFWALRLRRNETGAPQDVSRVFPFEGFLQRT  
LSHPAVGGFLTHCGWNSILESRCRGVPLLAWPLHGEQRMNKRFRVDEAKVALEFTMGPNGIVEAEEIAKV  
VKELFVSEKGNMVRVQAHQWKTLSAKAVAPGGSSASNLQRFVDEIFAPLNSTH\*

>Phypa1\_1\_128968\_e\_gw1.73.38.1  
EIVQERDPCISWLNTRPAKSVLYVSFGSAASHASQLVDLALGLEASECSFLWIVRPPDAIDRAATLNLAL  
ERVAEYLPFGFEGRVKDRGMCYSGWAPQMRILKHPAIGGFLSHCGWNSLETVAAGVPVLAWPIKAEQHL  
IRRFLVDTLRIAIVELKGDNYAELEEGDGLRPPLRVSKEEIANKIRCLMVEEESQLLQLNLQKLMVKFKE  
AGALGGSSRLNFEAYVSLHANHDSAAQLKEMEHEKSEMRDIFSTGERPLAIATLG\*

>Phypa1\_1\_132121\_e\_gw1.93.46.1  
AEKFSIVRYCLFASPHFLSLLFHLPKFNDENLIPVKKGDEPLMIPNFPPIAGDLPPSQQADNGNPGSH  
FFLLNETKQMWKAAGVLVNSVEEIERPVLEGLQRVIDETITFGPLVDGCGEGKLSLRDKLREMKEGGDWY  
DWLSQQPDSSVLYMCFGTVAMLSDEQIRQMAIALENSGQRFFWALRLRRNETGAPQDVSRVFPFEGFLQRT  
KSKGLVYFDWAPQLHILAHRAIKGFVTHCGWNSMESILMGVPTIGWPMQAEQMLNAIFLDKVLGISIRI  
NKTAGWKDMISSDTERAIHTLMVDPSGETMKAKVLQISDTEKAAARPGGSSRINLESFVQDVRMMASGG  
VNS\*

>Phypa1\_1\_150508\_e\_gw1.317.48.1  
MHWLDAREQSSVLYVSFGSLLTVTETQIHEL AHGLEICGRPFLWVYRVPNTQIIPADASTEDSLSEGLP  
PGFLERIQGRGKLRGWAPQEKILAHKSVGAFMSHCGWNSSEALWSGKPLVAVPLAVEQRLTARYYYSP  
SRTWISPGPVLSSGVRKNDDSDIVESAEVVAISLLMEEREETGIHSGKFRMQELAHMAVDDGGSSRSNLQ  
VLIDSIKNQNPLT\*

>Phypa1\_1\_162515\_estExt\_fgenesh1\_pg.C\_440071  
MESSIVDWTGVPHVVLIPWFGAGHTIPFLEIARRLAAEGIVITLVTTDRHVVEVRSLVGSMDLTSQLPL  
RLGLRDNMAHLSHYEWMEKEREDPEAQLNVVKKLQELIVDVGSPDSMKLRNVQPAAPPVCVLDLDFVWP  
AQLAAENLKIEKHMFSYSSASAMSCALQTRRLYQEGRIPITREMRNMVFTDIPGLPPALDLFSSFMDP  
VMYKWSRHYFACQNAADVLLINTYYDLEKPVLDALRNEVIAAPDAQIKFIYDIGPLLPESYVRRDRDDDI  
LQQGSEETDPCILWLNTRPPSSVIYVSFGSMQTNPPQLLEMALGLEASGSSFLWVLRPPDSPGMTAALG  
GPCSITEFLPSGFEDHVKERGMCSYSGWAQQMRILKHPAIGGFFSHCGWNSLEAVCAGVPILGWPFKAEQ  
HLNCRILVDTLRVAIEVEGNPHTKEELESEKVRDLRFVSKEEIEKKVRNLMQEEKQLIRENMQRRIKS  
REVLSSQGGCSRQSFAYLRLLRGKRDNFLASRPNQLHRVHLNTPCTANRQFR\*

>Phypa1\_1\_162654\_estExt\_fgenesh1\_pg.C\_450169  
MTVARREQRQVDGMRKGRHLHVVLVLPYPAKGHSIPLHFAKQLHSMGVFVTFVNTFNHLSKEHFRSIYGAN  
EDDNPQVPLGVTPEEGEGHTSLPYVNVHNTLVPETKILMTTLFARHEDAPPSCVSDMFLGWTOEVAN  
TFNIPKYVLFASPASGLAFMLHTSELVKQKGLPIDRSKEEDLVYDIPGVPPTRLADFPSPIQDPEDDSYL  
FYLRNCFELAEAGVLINTYYELEPTYIEALRKAYNLISFLPVGPLLPKAYEFPSDDVVPVDSDIRDPCL  
KWLDTQPDSSVLYVSFGSVAVLSIEQIQEIAQGLEASGQRFLVLRPPSNPENVPLPEGFEEERTRGRGF  
VQVGWAPQLWVLSHRAVGGFLTHCGWNSLESICRGVPMPLAWPIQAEQAMNARFLVDVVKAGVELCRVTD  
KLVTKERISETVKFFMTEGVSTARKNVRKLQKLALNAVALGASVQKNLEDFTEVRFQKLPNGL\*



>Phypa1\_1\_174128\_estExt\_gwp\_gw1.C\_40016  
MKIEHTNGNVVKTLLHAVIVPFPAAQGHITPCLQLAKKLVRGFGHITFVNTVHHDRLMKSSFKDREPDEDI  
EFVAVSDGLPDDHPRRLADIVAFSVAFSEGRPVFAELLVKLLRKSPTCVIRDISSGVVQEPARKLGIPVV  
GFGTSPASISIQCRTHIETIEAGVPLPLPPPMNTSTPSLDPVKVNDIPTYLLTHDLDSHFVRLNRACQRP  
LLQSCECLLNTFHDLEGEVLDAMTDINANIYSVGLPIFNSSKKSQVDGVEELSLAATESALWKEDPISLS  
WLDNQKQNSVLFVSVFSGSIATMSIEQMLEFALGLEISGHAFLLWVIRSDSIEDTHENEEFQITFSDFKRTQ  
DRALFVWPVQQAIVLSHPSVA AFLTHCGWNSVIESISSGVPMCLCWRPFADQNTNCHYVKCVWEIGLDFES  
QVKGDTTIVSKEELDKKVRRIAMKDGADLEIDKIRTNARNLRIAARKAVSEGGSAHTAFMKFVQIQQTS  
KLQLPS\*

>Phypa1\_1\_188562\_estExt\_gwp\_gw1.C\_1200091  
MEAEDLVHVVITVPCGHLIPASQMAKHLLSLGMKVSCFNTGINYPVSVERHFEEKFGEVKIVFRPLRK  
ENEFVPPGKRLEEHLDWIQHLNDEAMAERLAEALRNLTPPPACIISDMLVGWSQDVANAFHIPRFLLYTM  
PANALLYMITVISTSLVSPA VAPKRPPDIWKSMDVPTSSINDYLHRNARRFCEAAMILVNTVEDLEAGLL  
DLMRTELIGKPNLLPIGLIRSYGGEICSDNSVSHNQEDTSCAEIFRWLDTQEDSSVLYVSFGTLVTVNE  
SQAHEL AHGLEQSGTFPLWVYRPPPEVCQVLPMDASVQDSLLDGLPTGFMERIEGRGLITQWAPQQLLS  
HRSVGGFM SHCGWNSTLEALWAGKPIVAWPCAIDQELTARYLVDDIKLAVEVHKNDGDLVESAEVARAIS  
LLMDENTGSGIRSWFVKMQQLAHKAIGEGGSSKTNLKTLDRLKSHLKTLP\*

>Phypa1\_1\_193985\_estExt\_gwp\_gw1.C\_2090075  
MRSQSARVLPPIGPLETSFAVKDSERNEHNPLGTVALEKEQKLSGEVEQWLDNQPSGSVLYIAFGSIFSLP  
AEQIREVAHALEASGQRFLWILRPPETPQVMERTDRGKLYSSWVMQPTVLAHPAVGLFM SHCGWNSILE  
AVSTCTPIIACSCFVDQHVNRARFVVDIFRIGSVAKNPQKGYERGHMESVIRNMMEGEKGKAARNNVTKLN  
KVL RDAVSPSSGSSAKNLQQYVAEIFAMAKAQAFLQSS\*

>Phypa1\_1\_222823\_estExt\_Genewise1.C\_2430017  
MHVLLSSYPDYHVHVRGILVNSVHELESSVFEALNEHYLRRIPVGPPTIPKSVFFKETNQENNANCSGVG  
RDPILQWLDTPQSSSVIYISFGSIATLTANQLVEMALGLEASGQRFVWILRPPSDPSMIAANSEAYSFPL  
PGFQDRVKTGQIIVTHWAPVQVQLQHPSTGGFLTHCGWNSILESIGAGVPMPLAWPIQAEQMINTRWIVEE  
VRAAFALRRDPYSFVDRNSIDKGVRLICSEEGQAACKNVHLHRDKLLSSFGDNGLSAKCLKSFVEELEQ  
LHAQ\*

>Phypa1\_1\_231689\_fgenesh2\_pg.scaffold\_137000006  
MAISEHGALQPHVVLVPSPLKGTIPFIILTKQLVGHGVVWTLVSSDKHIASQEQDKVNFVGLREGPSNF  
MEAISEVSDVRMAEMLSEWLRLMAMEMPQKLKSDGHSQARAAPCCIISDMFGGWTDQVEKKFEIPNHVLF  
SPAACAAMQLTIPKLFEEGILPFPSSHKGYNIPGIPPLDFHDLPEYLIAEESSTKHKFLVDATAKVAVEV  
VKGKHFVVRKVEVERVRLLMQKFLGIDIRNRKTMAEFAHKA VAPGGSSQNGIKIFLMELNNTSNHNDN\*

>Phypa1\_1\_233857\_estExt\_fgenesh2\_pg.C\_1080033  
MGSNSGNVHVVLVFPFSAIGHCMPLFLYLASRLAQVGVKVTFLCLEGLRSQQLTSPSFKPHAGVILHKNIDI  
YTVKDGFSSTRAGLGAADVIREESRPALVSFCDCLSLMSGASLAPCCIISDMMLGFTHDVAAKFNIPR  
VVLHTQSAANLSMLQVPKLLADSLPLTTSQDVVFVQIPGLKVRRLRASELPTDLDPNALIPKLLKIDSY  
GNFLYMSRRAAEAPIVLDNTFRELEADVLAALDETGQLMRMASSKSLMRALFSSWIGYENCIEDFALGLE  
ASGQPLWIAGDLISRRQDQPTITQCLPPGFLETKDRGMVVTWAPQLRILNHPSTGAFLSHCGWNSIL  
ESISAGLPIIALPRAEQKMNCRFLVDVAQVAVELKVDKGRPTSSSEVERKVRVLMQQDEGRTLKANVQ  
ALKRSEESSAASIHILIKFISAAESHVQQRDNNNNNNNNNNRAWHPVN\*

>Phypa1\_1\_3319\_gw1.232.10.1  
HVVLIPYPAKGHSIPLHLAKRLHSMDDVVVTFVNTFSLSEEHIRTL DGLDYSMRVVELGVQPPEGEGSG  
ELPYVAHANELVPDSMFMMKELFAENKEAPACLVSDFMFLGWVQVADKFNIPRYVLFSSPASALPTMLH  
VPELIRQGRPLPIDRSKWLELVHDIPGVPPTRIVDLPSPLQIHTRFLYSLFVQNA YDMHDAAGVLINTYEE  
LEAPCIDTVRQTEPHLLSILPVGPPLPDYVYVNGKIH EASAHMKEQEPCQLWLDTPESA VVYASFGSVAT  
VPIQIHDALGLEASGERFLLALRPPNPNDVALLPEGFEERIKGRGFVHFGWVQPLYVLSHPAVGGYL  
SHCGWNSLEGLCQGLPMLTWPIQAEQAMNARFLVDEAKVALEVCTLTDGFITKDHISKVVRSLMREPEG  
ALCRINALKRLNLALAAVSEGGSVPKSL

>Phypa1\_1\_67713\_fgenesh1\_pg.scaffold\_15000245  
MAANGDAVAAPVEGQKSGCHLLVIPYPARGHNLATLQLARMFLPYGVRITVGNIFDNMAQDFLDICRAED  
MTVVNLGVRPADHPVNTNLPYFDVVKRVQGETEQLVERLNADTESPPLTCILSDIFLGTQDVADKFGIP  
RYVICASMKGVM AALLYMPELAAQGILPVEPSKTSSELVHIPGLQPTRCGDLSPA VQTASGLHMYTEYVYG  
CCQPAVEAPGCFINSFYELEPCIDSLRSHPHYRRAHSQGPNGRSVFPVGPVHDSYLELLRSGPTVKRCS  
SVEPEAPYLKWLDMQPKDSVIFVSFGLASLSIQIRELILGLEASSHRFLLVIRPTASEDADEILPLLT  
KSFEEQRLSTGFVQSEWVNQFDVLSHRAVCGFLSHCGWNSSTFESICRGVPLLGPWIQADQKLNCRFLVDE  
AKTALEVHKGNPAFVSREEVARAVRQLMTEPEGEVRANVGKLRQLKEAVSKDGSVQRSIENFLAEIRSS  
NN\*

>Selmo1\_102508\_e\_gw1.26.112.1  
MDSQPPHVLAFFPPTQGHINMILLCRKLASMGFVVTFNLNIGSKNMSSTADEQFRIMSISDECLPSGRLG  
NNLQMYLNAMEGLRGDFETTVEELMGDSQRPLTCLISDAFIGWTQVANKFGICRATLWTS CATWALAC  
HFHLSLESNGLLPAYGKNHFHSYYYTKL FAGSSRVLDFIPGMPSSFAAKYLPDTIQNV EYPDPGFLKRRQ  
RNEIMRNDAWVLVNSVLEVEASQIEEISRSENPNFVPIGPLHCLSTDDTRARLAVASHSPWRQDRSCLD  
WLDRQAPNSVLYISFGLATASHDQVEEILAGLDSGSAFLWVARLDLDFEDDDTRDKIVATVRNSQNSLV  
IPWAPQLEVLEHKSVAFLTHCGWNSITEALATGVPMCLKPCFGDQITNCALVVDHLKVLGRATVEEHDK  
QTAHRIEKVVRLVMGESGQELRKRKAKELSDTVKGA VKPGGSSYANLQAFVQDMKRRALK\*

>Selmo1\_104303\_e\_gw1.29.158.1  
MKQAIQKDFLPLVPGPLFLLGDRPEDTGFSTFDPKCLGWLDQQPDKSVLYIAFGSVAELSIEELVEFGEGL  
VASKQKFLWVTRPSKDNENTFEYVESFGDKNREQFVTSWAPQARVLSHSSVGAFLSHCGWNSTIEGVSSG  
KVILCWPLFDQNLNRRLVVENWRVVGFDKTKQGVRRREEVERVIRLAMKEDQGREARRRVEELSGKMKR  
AVTVPGGVSLQNLKFKVWEIVSSRV\*

>Selmo1\_105043\_e\_gw1.30.356.1  
MLHFVKPALEALEPPAQVLISSAFMGWSQDLADSLGIPRVALWPSNAANEVIATYLPRLIAERYVLPQV  
GDCKDDEKLITIFPLRPTQLPVCYQNDSIDARMQAVAIARLPQAVCVLVNTIEELEIEVVRARQQT  
LRSYLPVGPLIRQKPIVNHRYKREAAACMEWLEKQAPHSVLYIAFGSVFGLAVEEVAKIADAVEETSQP  
LWAMRRNFATNAPGGFFELAARITGGGRGLLVEWAPQQLLPHSSVGAFLTHCGWNSTLEALAAGVPTL  
CWPVAAEQNWNAMVLTTEWKIGVNVVSGGEIAGAIRAVMSDEIGSGMRARARSLRESIGDGGSSARNLH  
ALALKAERENEPEP\*

>Selmo1\_110114\_e\_gw1.39.79.1  
MGSSSPPEL VHLVA VPWVIPGHVNP LLHLCSKLAALGSFQITFINTFENHERMFKSREPITREGIDFVG  
VSDGMPERGANDHPPGMEGLKEVIKSSDGLQRGVEELLESMIHERGIPIKAIISDLFLHWIQDIATRFK  
LVRVAFSTTSATFDLVTLHMRRRLRSEGFVVKNRRTTGDKKIDFFPGIFSFPFDLPLAWYEEHPIPFEE  
PPYERLFQADWILSGTFQALEPDIVSIFHHHYGVKNYLPIGPFLPDEHMHGSGDGGQEDLRAALSSDLR  
CLEWLDLRPNSSVLYVAFGSIAVMPSDQFQELLHALDHCCAENKVGVLWSIRPNLVDGEFPREIFDAFL  
RSGDGCACVSWAPQMRVLRHVAVGGFITHCGWNSALEGMCAGVAMIGWPCLEQNLCNSFLAKRKLMLR  
KDHSRDGILGREEIARA VDELMHGEIGKEIRANVGA VKIEARKAVATGSSSHGNLQAFVNALAFKV\*

>Selmo1\_111188\_e\_gw1.42.268.1  
MFAGKPHVVLVPYPAQGHFSPVFLGKLAELGCAVTIANVVSIIHEQIKVWDFPSELDIRLEPLHPAVDL  
SKGVLAAAADLIRFSRAVYDLGGEFKNLIQALNDSGPRVTVIISDHYAGSWCAPVASEFGIPYAVYWP  
SAAWFAVEYHAPLLISEGDLPIKDGEDREITYIPGIDSIKQSDLPWHYTEAVLEYFRAGAERLKASSWIL  
CNTFHELEPKVVDAMKCLFNDKFLPIGFLPVLDDHGDLSKSVLSFLKEDRECLDWLDTQPDSVLYVAF  
IAKLSQEEFEELALGLEASKVPFLTVRPPQFVDEADTTVLVKNNSDFYKNFVERTKGRGLAVSWAPQRE  
LAHRAVAGFVSHCGWNSVLESVSSGVPIICWPRIYEQGLNCKIMAERCRIGVEVSDGRSSDAFVKREEIA  
EAIARIFSDKARKARAREFRDAARKAAAPGGGSRNNMLFTDLCSSTDTRS\*

>Selmo1\_111272\_e\_gw1.42.326.1  
MFAGKPHVVLVPYPAQGHFSPVFLGKLAELGCAVTIANVVSIIHEQIKVWDFPSELDIRLEALHPAVDL  
SKGVLAAAADLIRFSRAVYDLGGEFKNLIQALNDSGPRVTVIISDHYAGSWCAPVTSEFGIPYAVYWP  
SAAWFAVEYHVPLLISEGDLPIKGLSLSTLIALNLCLV\*

>Selmo1\_111307\_e\_gw1.42.177.1  
MRSLSGVSAPQREVLRAHRAVAGFVSHCGWNSVLESVSSGVPIICWPRIYEQGLNRKIMAESCRIQVEVW  
DVRSSDAFVKREEIAEAIARIFSDKARKARAREFRDAARKAAAPGGGSRNNMLFTDLCSSTDTRS\*

>Selmo1\_111448\_e\_gw1.42.74.1  
MIFAGKPHVVLVPYPAQGHFSPVFLGKLAELGCAVTIANVVSIIHEQIKVWDFPSELDIRLEPLHPAVD  
LSKGVLAAAADLIRFSRAVYDLGGEFKNLIQALNDSGPRVTVIISDHYAGSWCAPVASEFGIPYAVYWP  
GSAWFAVEYHVPLLISEGDLPIKDGEDREITYIPGIDSIKQSDLPWHYTEAVLEYFRAGAERLKASSWIL  
LCNTFHELEPEVVDAMKCLFNDKFLPIGFLPVLDDHGDLSKSVLSFLKEDRECLDWLDTQEPDSVLYVAF  
GSIKLSQEEFEELALGLEASKVPFLTVRPPQFVDEADTTVLVKNNSDFYKNFVERTKGRGLVSWAPQR  
EVLRAHRAVAGFVSHCGWNSVLENSVSSGVPIICWPRIYEQGLNRKIMAESCRIQVEVSDGRSSDAFVKREE  
IAEAIARIFSDKARKARAREFRDAARKAAAPGGGSRNNMLFTDLCSSTDTRS\*

>Selmo1\_111464\_e\_gw1.42.270.1  
MFAGKPHVVLVPYPAQGHFSPVFLGKLAELGCAVTIANVVSIIHEQIKVWDFPSELDIRLEPLHPAVDL  
SKGVLAAAADLIRFSRAVYDLGGEFKNLIQALNDSGPRVTVIISDHYAGSWCAPVASEFGIPYAVYWP  
SAAWFAVEYHAPLLISEGDLPIKDGEDREITYIPGIDSIKQSDLPWHYTEAVLEYFRAGAERLKASSWIL  
CNTFHELEPKVVDAMKCLFNDKFLPIGFLPVLDDHGDLSKSVLSFLKEDRECLDWLDTQEPDSVLYVAF  
SIKLSQEEFEELALGLEASKVPFLTVRPPQFVDEADTTVLVKNNSDFYKNFVERTKGRGLAVSWAPQRE  
VLAHRAVAGFVSHCGWNSVLESVSSGVPIICWPRIYEQGLNRKIMAESCRIQVEVSDVRSSDAFVKREEI  
AEAIARIFSDKARKARAREFRDAARKAAAPGGGSRNNMLFTDLCSSTDTRS\*

>Selmo1\_111739\_e\_gw1.43.169.1  
MREGFGENFVPGPLFPLKGEAIDSTGLQEVNLRTPDESCLPWLDKRDRGSVLYVVSFGSISFMTAKQFEE  
IALGLGASKVSFLWVIRNSVLMDEEFYKGFVSRGTGGRGLFVRWAPQLEILQHESTGAFLTHCGWNSML  
ESLACGVPMGLGWPMSMFEQNTNAKLVELEGVGVAFSRSGGKDGAFREEVEEKVRAIMEGEQGRRLKARA  
MEIRELAVKAASPGSSHTNLKKFVESLAS\*

>Selmo1\_111888\_e\_gw1.43.281.1  
MGSHEKLVHVIPLPAQGHVPIIYLARKLALLGVTVTIINVDSIHETLQQSWKSEDNPVSNGHNRLES  
ISMDLRVPNGFDEKNFDAQAAAFCEAIFRMEPLAELLSRIDRDGPRVACVVSDFYHLSAPHAACKAGLAG  
ASFWPNGNAAWAAIEFHVPKLEMGDVPVKGEALIDLEVCSKKTWDFYGASGR\*

>Selmo1\_111946\_e\_gw1.43.430.1  
MGSHKLVHVIPLPAQGHVPIIYLARKLALLGVTVTIINVDSIHETLQQSWKSEDNPVSNGHDIRLES  
ISMDMRVPNGFDEKNFDAQAAAFCEAIFRMEPLAELLSKIDRDGPRVACVVSDFYHLSAPHAACKAGLAG  
ASFWPNGNAAWAAIEFHVPKLEMGDVPVKGEALIDLEVYKLSIYIPGMELRSQDIPLFMHDGEFQKVGE  
EQSLYRSKRITLDSWFLINSVHDIEPRIFEAMREGFGENFVPGPLFPLKGEAIDSTGLQEVNLRTPDES

CLPWLDKDRDRGSVLYVVSFGSISFMTAKQFEEIALGLEASKVSVFLWVIRSNSVGLMDEEFYKGFVSRTGGR  
GLFVRWAPQLEILQHEATGAFLTHCGWNSMLESACGVPMLGWPSMFEQNTNAKLVLEGEVGVVAFSRSG  
KGDGFAPREEVEEKVRAIMEGEQGRRLKARAMEIRELAVKAASPGSSHTNLKKFVESLAS\*

>Selmo1\_112093\_e\_gw1.43.294.1

MGSHEKLVVLIPLPAQGHVVPPIIYLARKLALLGVTVTIINVDSIHETLQQSWKSEDNPVSNNGHNIRLES  
ISMDLRVPNGFDEKNFDAQAAFCEAIFRMEDPLAELLSRIDRDGPRVACVVSDFYHLSAPHAACKAGLAG  
ASFWPGNAAWAAIEFHVPKLLEMGDVVPVKGALIDLEVCSKKTWDFYGASGR\*

>Selmo1\_113943\_e\_gw1.47.147.1

MTLHHATDPKFSADIVGKTFVEAVGYSSQADRVLANSSTHTLEGNAVRALELCGINIVPVGPHLHNISTGS  
DPDDPNQVIPWLDKQESRSVL YIAFGTIAPVPAQFEQIALALESTKNIAFLLVVRPQQLELVPKEFGAT  
ARYALKSGGALEHVNGGTVYRGLLTDWAPQVAVLGHRAVGGFLTHCGWNSILESVTVGVPVMSMPRMADQ  
CLTRKILDEEWGISVRLGNAITDVVSKADLEAAIQELMFKRRDELGKKASDLGELARQGMEEGSSRSRGI  
DSLVKDLELWK\*

>Selmo1\_115208\_e\_gw1.50.209.1

MIRELAHGLESSGFAFLWSPRNEEPAAYLNRVLPNFAERTSGRGKILTGWVPPQVLVLSHPAIGALV  
SHCGWSSVVECILLAGVPILAWPFLGDQLPTCRHLVDEYKIAVDIGVDGVPVSAADDVERGLRAVMEDQELR  
NRAKQRRKLVRAALSTQPGSSGHNLAEFISSLAG\*

>Selmo1\_115886\_e\_gw1.52.275.1

MASSKVHVLAVPAAVQGHISPMHLCKFIAQDPSFTISWVNIDSLHDEFIKHWVALAGLEDLRLHSIPFS  
WVKVPRGIDAHALGNIADWSTAARELPGLEDLIRKLGEEGDPVSCIVSDYSCVWTHDVADVFGIPSVTL  
WSGNAAWTAWSITTFQSFWRKITFFLAEEANSVIDYVRGVKPLRLADVPDYLLASEGQEVWKEICIKRSP  
VVKRARWVLSNSFYDLEAHTFDFMASELGPRFIPAGPLFLDDSRKNVVLRPENEDCLRWMMDTQEPGSLV  
YISFGSIAVLSVQFEELVGALEASKKPFLLWVIRSELVVGGLSTASYNFYERTKNQGFIVSWAPQLRVL  
AHPMSGAFTHCGWNSVQESIANGIPMLGWPYGGDQITNSKFVVEDWKIGVRFVSKTVVRGLIGREEIEDG  
IKKVMDSDEGKMKKERVENLKLAKKAMDKEHGKSFRRQLAFLEDLKALS\*

>Selmo1\_116931\_e\_gw1.54.261.1

MEDHVQKEWLDAQEVSSVLYVCFGTMVPEEQVMEVGYGLEASQSFLLVWVRESSQRKLGDFLQGLRTR  
IGNRGLIVSWSQIDILRHPSVGGFVTHCGWNSLTLESLSGVPVPMIGWPFMGDQPINCKFMVDVWRVGVRI  
ESKNSSDGSSRIVGRSEVERASRLMGSETLRKRAKEIKSKAMEAMEVSRARLKELLYL\*

>Selmo1\_12509\_gw1.59.70.1

MGSQGAIVPHIV AIPFIWPGHITPLLHLCOHLAASGLVTLTKTPENSQSVGAEKWENGVRKISCLPLD  
PSKALPAVHKDDQAACKLDEILRYFNRFQALNDDGSVLTIVEDVGKSSGVPISCVISDVYVVGWARDLATKL  
EVPWIALWTSTVAELLVYYHMPRLIAQGIFPAGNPSHEKFSIPGLPSLQPENYPTFGFLPFESLHKILH  
TFKELVQMIPRADRVLVNSIEGIEGSAIDSLRSSGVNIKPIGPLHLLSEKLGTSAPQGEAECKKESIEIQ  
WLDARPDSSVYIAGFTTMSVANGQFEELASALEESRQEFVWAIRDSSLIPPGFQERMASKLDQGLVSWA  
PQLEILGHRVSGGFLTHCGWNSVTESMSFGMPMVTRPISGDQVLTAKFVIDEWGIGVGVRGIEIGLELAR  
KDDLKNSIKALMEADPKTSEIWKNARRVKEVVRAAMKNKGSRRNLDLVCDLHQR

>Selmo1\_126247\_e\_gw1.82.67.1

MGFNEHISSDGILFNSFTELEPELKFALAESFEEIKHHELLPIGPLFSPKYFATKESA VLRSSEEEERCQ  
SWLDEQPVESVLYVVSFGSFALLTPRQISELALGLEASQQRFLWVVPVKNKSIEGLEVLLPEGFLKRTEER  
GLVLPSWAPQHLILAHSSLGFLTHCGWNSLTLEAITLAGVPVIGWPFLLGDQAPNCRYLVDGLRIGVEVIG  
NDNGLVDSNEVERVVREIMESPGAEGMKS RVKEFKAAASRAVAQGGSSQKNFDVVFVARIKSLMVR\*

>Selmo1\_127526\_e\_gw1.87.93.1

MEEKKQRPHLLAVPPFALGNINPMLQLCKTLVSNNGFFITFLISNKRETFATEQQATGQHLRFVYLPDAF  
IPEAFSVTTVPLQFVAILEKNLKLAVPEIIRDIMTDDSLPRVSCILTDLAITSQDVAHQFGICKVSLST  
FASVLSIENGLLVLEENGLLPLKGTSRIDFVPLGPPISGLDFPSHLQEVHVAVDPDFSLRYTRNQIIRS  
DALVFNINSFYELTSQDLARDTPQFVPIGPLLPSFAFDGQVGVDEHEQERCQFWTEDMSCLDWLDQPP  
FKSVIYVSFGSLASASPDQIKLYTGLVQSDY PFLWVIRPDNDELRLKLFDDPSYDKCKFVSWAPQLKVLK  
HRVSGAFLTHCGWNSVLETIVAGVPVVGWPFLLDQPLNCALAVEHWKIGSRLPPGPDATLVEKAVKDMMG  
EAGQMWRDNVTKLAIARDAVSDGGLSHRNLEAFKCKMEIVS\*

>Selmo1\_127915\_e\_gw1.88.129.1

MASQGTSSPNHVLAFVPGQGHITPMMHLCKKIAARDGFTVSFVNVDLSHDEMIKHWRAPPNTDLRLVS  
IPLSWKIPHGLDAYTLTHLGEFFKTTEMIPALEHLVSKLSLEISPVRCIISDYFFFWTQDVADKFGIPR  
IVLWPGSAAWTTIEYHIPELIAGGHKLVADES VVGIIKGLGPLHQADIPLYLQADDHLWAEYSVQRVPYI  
RKASCVLVNSFYDLEPEASDFMAAELRKGGEFELSVGPMFLLDEQTSIEGPTNVVLRNEDDECLRWLDKQ  
EKASVLYISFGSIAVVTVEQFEEI AVGLEAIGKPFLLWVLRPELLIGNPVEKYKEFCERTSKQGFTVSWAP  
QLRVLKHPISAAHLSHCGWNSVLESISNGVPLMCCPWGAEQNTNAKLVIHWDWKIGAGFARGANGLIGRGD  
IEKTLREVM DGERGKQMKDAVEVLKCKARKAVESDGRSAASLDDFLKGLSSQ\*

>Selmo1\_128032\_e\_gw1.88.124.1

MASQGTSSPKIHVLAFFVPGQGHITPMMHLCKKIAARDGFTVSFVNVDLSHDEMIKHWRAPPNTDLRLVS  
IPLSWKIPHGLDAHTLTHLGEFFKTTEMIPALEHLVSKLSLEISPVRCIISDYFFFWTQDVADKFGIPR  
IVLWPGSTAWTTIEYHIPELIAGGHKLVADES VVGIIKGLGPLHQADVPLYLQADDHLWAEYSVQRVPYI  
RKASCVLVNSFYDLEPEASDFMAAELRKGGEFELSVGPMFLLDEQTSIEGPTNVVLRNEDDECLRWLDKQ  
EKASVLYISFGSIAVVTVEQFEEI AVGLEAIGKPFLLWVLRPELLIGNPVEKYKEFCERTSKQGFTVSWAP  
QLRVLKHPISAAHLSHCGWNSVLESISNGVPLMCCPWGAEQNTNAKLVIHWDWKIGAGFARGANGLIGRGD

IEKTLREVMDGERGKQMKDTVEVLKCKARKAVESGGRSAASLDGFLKGLSSQ\*

>Selmo1\_128107\_e\_gw1.88.128.1

MASQGTSSPKIHVLAFPVPGQGHITPMMHLCKKIAARDGFTVSFVNVDLHDEMIKHWRAPSNTDLRLVS  
IPLSWKIPHGLDAYTLTHSGEFFKTTIEMIPSLLEHLVSKLSLEISPVRCIISDYFFFWTQDVADKFGIPR  
IVLWPGSAAWTTIEYHIPELIAGGHKLVADESIVDIKGLGPLHQADVPLYLQADDHLWAEYSVQRPYI  
RKASCVLVNSFYDLEPEASDFMAAELRKGTEYLSVGPMLLDEQTSIEGPTNVVLRNEDAECRLWLDKQ  
EKASVLYISFGSIAVVTVEQFEELAVGLEAIGKPLWVLRPELLGNPVEKYKEFCERTSKQGFVSWAP  
QLRVLKHPISAAHLSHCGWNSVLESISNGVPLLCWVPWGAEQNTNAKLVIHWDWKIGAGFERGANGLIGRGD  
IEKTLREVMDGERGKQMKDTVEVLKCKARKAVESGGRSAASLDGFLKGLSSQ\*

>Selmo1\_131108\_e\_gw1.105.22.1

MRSLSQSSDSSSPSSKIHVVVPLPAQGHMSPMIHLCKLIARDPSFTISLVNVDLHDEFVKHWVAPAGL  
EDLRLHSIPYSWQLPLGADAHALGNVGDWFTASARELPGGLEDLIRKLGEEGDPVNCIISDYFCDWTQDV  
ADVFGPIRILWSGTAGWSSFEYHILDLEKNHIFHSRASPEANAVIIDYVRGVKPLRLADVPDCLLAS  
EGQVELKIEICKRSPVVKRARWVLSNSFYDLEAFTDFMASELGRFIPAGPLFLFDDSRKNVVLRPENE  
DCLHWMVDVQEPGSVLYISFGSIAVLSVEQFEELAGALEASKKPLWVIRPELVVGGHSNESYNGFCERTK  
NQGFIWVSWAPQLRVLAHPSMGAFTHCGWNSVQESIANGIPMLGWPGGEQNTNCKFIVEDWKIGVRFK  
TVVQGLIERGEIEAGIKKVMDSSEGGKIKKRVQNLKILARKAMDKENGKSFCGLQGWLEDLKAMKLDK\*

>Selmo1\_133674\_e\_gw1.120.12.1

MAIDELKVSCRRPHIVAVAYLTQGHINPLIHFCLKLAHHGILVTFVTIHDVGLLGVGQRKDPEVPEHWKN  
NFNERLELELPKEGVMSPGGFAKIFAMIEELGGPFEEELSKLHSREEIPKVSICVSDCMLVFTQVVAKK  
LGIPRAGFWTTSLASLTVDYHVPLLENGDIPVTGKNIRENWEKIITYVPLAPLPAWSLPIMYHEGNIM  
TTTTDQGYKRKIARCVILRDDAWIANSFEKLEPAGFQALRKAMNQRCVGVGPLLPEFFGERGDYDEHRK  
VVAPGVASFVKQDITTCLEWLAGKAPNSVLISFGSVIKLTLPEFEELSRGLESSKQAFWAFRPGCVEGL  
EIEDLESFKERTSSTGLVISWAPQVEVLSHESTGGFLTHCG

>Selmo1\_134299\_e\_gw1.124.18.1

MQVILWSFRFHPEDGVLEKELISAANPPISCIITDNLASWAQDVADENIPRIIFYPSPGMALAFHFYV  
KSMLHENKLPVRAQELVRIPGIDSAGLSPLSSDQVSSPIETIPDVMRIFYVTNALRAHEAAGVMCNTFA  
AIEEEACIAVSENAMINPNKVPFMDIGPLLPDYPFADDDACEHCDKVECLAWLDEQPTASVVYISFGSFA  
RANREQIEELAFGLEASEKRFLWVLHNGAEFLPEGFLEERATTNKTGMVVTKWAPQLLVLSHRAVGGFMT  
HCGWNSTMESLSRGVPIITMPFYGEQRGNARIIVEHLGIGVGLAKDGEDGLIPRIAFERAFRAVIDEGEL  
VRSKAAQVKETARAFAFKESPRKIKGFIHKVLHAG\*

>Selmo1\_134899\_e\_gw1.130.100.1

MASSKVHVLAFPAQAQGHISPMIHLCKLIAQDPSFTISVWNIDSLHDEFMKHWVAPAGLEDLRLHSIPFS  
WKLPQGDIAHALGNADWSTAAARELPGGLEDLIRKLGEEGDPVSCIVSDYGCVWTQDVADVFGIPSVTL  
WSGNAAWTSLEYHIPQLLEKDHIFPSRGMNLRSSPANSVVIDYVRGVKPLRLADVPDYLLASEGQEAWE  
ICIKRSPAVKRRARWVLSNSFYDLEAHTDFMASELGRFIPAGPLFLDSDSRKNVVLRPENEDCLRWMMDT  
QEPGSLVYISFGSIAVLSVEQFEELVGALEASKKPLWVIRSELVVGGLSTESYNGFYERTKNQGGFVSW  
APQLRVLAHPSMGAFTHCGWNSVQESIANGIPMLGWPCGGDQITNSKFIVEDWKIGVRFKTVVQGLIG  
REEIEDGIKKVMDSDGKMKERVENLKILARKAMDKEHGKSFRLQAFLEDLKALS\*

>Selmo1\_143651\_estExt\_Genewise1.C\_61172

MAMQGPVESLLIRSMARDDDLVPPVSCFISDMLLPWSAEVARRTGIPEVKFYTASASCVLLDCSFPRMLE  
KGDVPVQDRSIEKYITYVDGLSPLPIWGLPRDLAIDESGFARRYARAKSFATTSWVLINSFEELEGSAT  
FQALRDISPKAIAVGPVFTMVPGSNKASLWKEDTESLSWLKQSPGSVLYISLGSIAATLSFDQFKEFSEG  
LRLQRPFIIWAIRPKSVNGMEPEFLERFKETVRSFGLVVSWAQVQVDILRHPSTAGFLSHCGWNSILESVA  
SAVPMCLWPCVAEQNLNCKLIVEDWKIGLKFSCVTMPDPPEVMARDEFVEVVERFMGTDSEHLRINVKKL  
SEEARRAVSRGGSSYENLERFGQAVKIS\*

>Selmo1\_144881\_estExt\_Genewise1.C\_90084

MADIVLVTVQGGGHFNTGMLFAKKLASQGCRVTVLLPWLNPSGMTTDIANIDMRALMESIPSPRAFIFP  
GVRKSRPDLVPSRFPALPDSLRLKHLVLRPKAVVLDLDMVMFVASQTVEERGIPKYILYTGASAHAVM  
LSFHGSPRSNGVDDQMQSVVHVPLPPLRWAELPLDVVVKSHGFYLGKEGVAKHFVHSNGILLNTSEELE  
GPILDALHCEYPEIRCIPIPLYPSSYLQDDRPSQEDIRGTAVSIGKNSDSTALVSWLDKQPTASLVI  
CFGSFIVLGDDEMIRELAHGLESGFRFLWSPSPRNEEPTAYLNRVLPNFAERTSGRGKILTGWVPPQL  
VLSHPAIGALVSHCGWSSVVECILLAGVPILAWPFLGDQLPTCRHLVDEYKIAVDIGVDGVPSADDDVERG  
LRAVMEDQELRNRAKQRRKLVQAALSTQPGSSGHNLAEFISSLAG\*

>Selmo1\_144884\_estExt\_Genewise1.C\_90087

MADIVLVTVQGGGHFNTGMLFAKKLASQGCRVTVLLPWLNPSGMTTDIANIEMRALMESTSPSPRAFIFP  
GVRKSRPDLVPSRFPALPDSLRLKHLVLRPKAVVLDLDMVMFVASQTVEERGIPKYILYTGASAHAVM  
LSFHGSPRSNGVDDQMQSVVHVPLPPLRWAELPLDVVVKSHGFIYLGKEGVAKHFVHSNGILLNTSEELE  
GPILDALHCEYPEIRCIPIPLYPSSYLQDDRPSQEDIRGTAVSIGKNSDSTALVSWLDKQPTASLVI  
CFGSFIVLGDDEMIRELAHGLESGFRFLWSPSPRNEEPTAYLNRVLPNFAERTSGRGKILTGWVPPQL  
VLSHPAIGALVSHCGWSSVVECIMLAGVPILAWPFLGDQLPTCRHLVDEYKIAVDIGVDGVPSADDDVERG  
LRAVMEDQELRNRAKQRRKLVQAALSTQPGSSGHNLADEFISSLAG\*

>Selmo1\_152941\_estExt\_Genewise1.C\_390153

MSTAEGGEAGRRHLVVLPLSAYGHTIPALLADRLNLGYEITYICPEYRMKQLLQSKARGCSQEIRFK  
TLKRTNPVAGKSELVHDTIQILASVILDYHENSKELEIMEELFICGGTTPPSCHICDAVVSLSWAQDVAN  
EFKIPWILFFASPALALTLIPGMENGLSLVHPDENCVPRDDLGSDAFEFFLESCLKIHDVAVGVMCNTMV

ELEADACKALEENRLINPNNVFFAAIGPLLPRSCLEESDQTFEENEAFEGAEEKKDACLKWLDQQTEAS  
VYVYISLGSLEASAEQVKEFAFGLEASRKGFLWVLPDGVESLDPDGFLETATGIAVNNRGFVLRWAPQL  
QVVKHRATGGFLTHCGWNSTLESMSHGVPMTMPFFTEQGGNAKMIVEYFKIGVRLPKDESGVITRHTIE  
VAVREVIENDAMRKRAAELKQVVRATAKAPPLKTKAFLEQILNKY\*

>Selmo1\_153665\_estExt\_Genewise1.C\_430203  
MREGFGENFVPGPLFPLKGEAIDSTGLQEVNLRTPDESCLPWLDKRDRGSVLVVSFGSISFMTAKQFEE  
IALGLEASKVSVFLWVIRNSVSLGMDEEFYKGFVSRVTGGRGLFVRWAPQLEILQHEATGAFLTHCGWNSML  
ESLACGVPMGLGWPSMFQNTNAKLVLEGEVGVAFSRSRGGKDFAPREEVEEKVRAIMEGEQGRRLKARA  
MEIRELAVKAASPGSSHTNLKKFVESLAS\*

>Selmo1\_154272\_estExt\_Genewise1.C\_470214  
MASRSNPPHVVIPLPISGHTNPLLQLSVQLASLGSDFITTSSTLQASLSALNHLCDGDQKLRQAIRF  
QALEVDRDRSGYTLSEIEVMARNSDEIKKLVAAASAPELGPVSLAIDFLLDRLESLACNVAAFWVSSA  
AMLHITVNVETLLEKGFPLSRNDRSPEKKVVDSSVIPGVPCELSVFTDIPEDPLDPVSFSSMRKLNLL  
KAPLIMNTLDLEEQTLGDRLDQGFGLVNVGPMLVGAVSSMEDHVQKEWLDAQEVSSVLYVCFGTMVE  
LPEEQVMEVGYGLEASHQSFLVWLESSQRKLYFLQGLRTRIGNRGLIVSWSSQIDILRHPSVGGFVTH  
CGWNSTLESLSGVPIMGWPFMGDQPINCKFMVDVVRVGVRIESKNSSDGSSRIVGRSEVERAARSLMGS  
ESLRKRAKVIKSKAMEAMEVSRARLKELLYL\*

>Selmo1\_157053\_estExt\_Genewise1.C\_650239  
MLWLSKQPRRSVYVYISLGSIVLLRLDQIEELAFALASQQRFLWVLRSPDSSSADREVLPEGFRRGERGLV  
VRDSWVPLAILGHSTGVFLTHCGWNSVLEGLCMGVLMLTLPFSFDQALNSRMVEELQVAVRWVSKTSTD  
RLSRHSIEGLIRRAMEEPQKIESLMATARNIKIL\*

>Selmo1\_160724\_estExt\_Genewise1.C\_1050141  
MGSLSQSSDSSPSSKIHVMAVPLPAQGHMSPVHILCKLIARDPSFTISLVNVDSLHDEFVKHWVAPAGL  
EDLRLHSIPYSWKLPRGADAHALGNLAEWFTASARELPGLEDLIRKLGEEGDPVNCIISDYFCDWTQDV  
ADVFGIPRILWSGTAGVTSLEYHIPDLLQKNHIFPVGGRRDSSVIIDYVRGVKPLRLADVPDYMQQNEVW  
KEICIKRSPVVKRARVWLVNSFYDLEAPTFDFMASELGRFIPAGPLFLLDDSRKNVVLRPENEDCLRWM  
DEQEPGSVLYISFGSIAVLSVEQFEELAGALEASKKPFLLWVIRSELVVGGHNSNESYDGFECERTKNQGFIV  
SWAPQLRVLAHPSMGAFLLTHCGWNSIQESITHGIPLGWPGYAEQNTNCKFIVEDWKIGVRFKSTAMQGL  
IERGEIEDGIRKVMDESEEGKEMKERVENLKLARKAMDKEHGKSFRLQLAFLEDLKLKLLHHE\*

>Selmo1\_162354\_estExt\_Genewise1.C\_1360045  
MIHLCKFIAQDPSFTISVNVNIDSLHDEFIKHWALEDLRLHSIPFSWKVPRGVDAAHVVRNLGEWFAAAAAR  
ELPGLEDLIRKLGEEGDPVSCIVSDYFCDWTQDVADVFGIPRILWPGTAAWTSLEYHIPELLEKDHIF  
PSRGRASADEANSVIIDYVRGVKPLRLADVPYTYLQGDVWKEISIKRSFVVKRARVWLVNSFYDLEAPSF  
DFMASELGRFIPAGPLFLLDDSRKNVVLRPENEDCLHWMDAQERGSVLYISFGSIAVLSVEQFEELAGA  
LEASKKPFLLWVIRPELVVGGHNSNESYNGFCERTKNQGFIVSWAPQLRVLAHPSMGAFLLTHCGWNSIQESI  
SNGIPMLGWPGYGEQNTNCKFIVEDWKIGVRFKSTVVGQLIERGEIEAGIKKVMDESEEGKMKERVENLKL  
ILARKAMDKENGKSFQGLQGWLEDLKAMKLDK\*

>Selmo1\_165329\_estExt\_Genewise1Plus.C\_20092  
MKHILVLPFPLSGHVIPMLNLCCKLASRGIGQITLLINEDCVETVEKLHKELVARGDLSKEVVFTVESIP  
VTWPPAFRGSAAEQIECLSRADGTGKFAEEVAIRALQSTSVPPVFSLLSDFGLWWSQDLANKLGVPRILL  
SIIGFQEFQIILQMPRLISQGIYNPFTETQDDDLNKLIEVPGFPAFRASEIPRISQIPDALKCYWDALL  
RYMTRAREAKLILVNSCYELEGEAYDATLRIHKLPIHLAAGPLASPLDSIATSCLKWLDTIRSPRSLV  
SSFGTYLQLPSSLEELFGEIAGSQQSFLAFRTDVVVGDPSPPTLLSFLDRYKEPQSDPRSKQRGLIVPW  
APQREVLLHGSVGGFFTHFGWNSVLESLLAAGVPMIGKPIVGDQVGNRRLAVDRWKVALEIPEDEDEKLRK  
EAVEATVRELFNEKLRANAARLGSLEIIVQENGCAKYCWDMVAKI\*

>Selmo1\_167957\_estExt\_Genewise1Plus.C\_61157  
MGSSTGAELGAPHAAVLPIPTLGHITPFLHLSRTLASRGFVITFINTEGNHRDLKDVVSQEEFSGYGGGI  
RFETVPGIQASEADFTAPETRQIFFEAVMAMQGPVESLIRSMARDDDLVPPVSCFISDMMLPWSAEVAR  
RTGIVEPVKFWTASASCVLLDCSFPRLMEKGDVVPVQETSDDPDSVIDFIPGIDSLSIKDIPSSLLTSTPEGL  
ERRSRIFSRNKEAACIFLNTVEELERKVVAAIQELLRPKFLTIGPLLPSSFLSDHPADENTVSAEGVWK  
EDMHCLS WLDEREPSVLYVVSFGSMATLKANQIEKALGLESSGQPLWVMPNLSVSESEAPNFCEDFVV  
RTKSQGLVISWAPQLQVVKHPSVGGFLTHCGWNSVLEAVCSGVPLLCWPCFAEQHLNCKIIVDDWKVGLS  
FFRGSCHGVASKEVHVQVIRRLMVEDPGKEIRKRAIELRNEIRSTVTEGGSSDRNLSAFVDLISKRLV\*

>Selmo1\_168007\_estExt\_Genewise1Plus.C\_61333  
MADEQLRHVAVLPTTSGHINPMLELCRRLVPLGFQVSFVYPSNLCPKLESSLRHDDLHFQVVPASPDK  
LLMDPALQEDVRPVEALRPPVKLIADMLFGWSQDVADSLGIPRVAFIPSDSVIEAMCYHIPELVSRG  
FIPGHVPANADPNPDALIDFIPGLEPFTRELLPLAFQHGQPVTTVGVAAARRTKDAVCIVVNTIEELDQE  
VVNNGRRLLFSSYLPVGPLVPAELLQEHPITLSSPNDTSMIWLKQAYRSVLYIAFGSVVTLPADQVEKI  
ARAVKATRQPVLWAIIRNFADKDPENFYESLQEIQVGAQACLVEVWAPQVNVLRHSAVGAFLMHGGWNSAL  
EALCCGVPMCLWPCGNDQNLNALTIVKKWRIGIMVAHGPKDDVRSEDLGNVIDAVMNGEGRMRMSRAQE  
LKKIVRAGTCLERNLRQLKDVIIAASQ\*

>Selmo1\_173967\_estExt\_Genewise1Plus.C\_240005  
MAPPHVLAFFPFAQGHINPMILLCRKLASMGFIITFINTRSRHEQEFKSTAVGDDSFVSVIPDDCLPK  
HRLGNLQMFNSMEGMKQDLEQLVMGMASDPRRPPVTCVLFDAFIGWSQEFCHNLGIARALLWTSSAAC  
LLLCFHLPLLKHLPAKGRKDIIDFMPGLPSFCASHLPSTLQHEDECDPGFELRIQRFERMKDDVWVFN  
SFQEMEAAPLDAARDVNPNCIAVGPLHFDDTGEETQLSMSPWIEDTSCLEWLDKQAPSSVYVVSFGSVAT

ISYSDAQVYEGLANSGHAFLWVIRLDLLQGSDEQARNDFSARIQQNEKGLIISWAPQVKVLEHESV GAL  
LSHCGWNSTLESLLCLPCFAEQVFNTAWVVDTLKVGVRKEVMEAGIHASHVEDMVRVFMGRDHCSGDEL  
RRRAKELRHAAKRNVQPNGSSHANLVNFAKALKLHCDL\*

>Selmo1\_177347\_estExt\_Genewise1Plus.C\_390229

MVIDELKVSCRRPHIVAVAYLSQGHINPLIHFCLKLAHHGILVTFVTIHDVDFGLVGVQRKDPEVPEHWKN  
NFNFERLELELPKEGVMSPGGFAKIFAMIEELGGPFEEELSKLHSREEIPKVSIVSDCMLVFTQVVAKK  
LGIPRAGFWTTSLASLTVDYHVPVLLLENGDIPRKiARCvILRDDAWIANSFEELEPAGFQALRKAMNQR  
CIGVGPLLPDGGFFGERGDYDEHRKVVAPGVASFVKQDITCKLWLAGKAPNSVLYISFGSVIKLTLPEFEE  
LSRGGLESSKQAFWLWAFRPGCVGLEIEELESFKERTSSTGLVISWAPQVEVLSHESTGGFLTHCGWNSVL  
EGICGGVPMGLGWPRQAEQINCELVFGMIGLRLVEANQSGRYQACPTSDVIASKVSRVLGDEGLRKRAG  
ELRDSARRAVKNQSGSTTTHVEGFVRYLYGESLS\*

>Selmo1\_177943\_estExt\_Genewise1Plus.C\_420428

MASQGTSSPKIHVLAFFVPGQGHITPMMHLCKKIAARDGFTVSVFNVDLSLHDEMikhWRAPPNTDLRLVS  
IPLSWKIPHGLDAHTLTHLGEFFKATTEMIPALEHLVSKLSLEISPVRCIISDYFFFWTQDVADKFGPIR  
IVLWPGSTAWTTIEYHIPELIAGGHKLVADESVVGIKGLGPHQADVPLYLQADDHLWAEYSVQRVPYI  
RKASCVLVNSFYDLEPEASDFMAAELRKGTEFLSVGPMFLLDEQTSEIGPTNVVLRNEDDECLRWLDKQ  
EKASVLYISFGSIAVVTVEQFEELAVGLEAIGKPFLLVLRPELLIGNPVEKYKEFCERTSKQGFTVSWAP  
QLRVLKHPISIAAHLSHCGWNSVLESISNGVPLMCWPGAEQNTNAKLVIHDWKIGAGFARGANGLIGRGD  
IEKTLREVMDDGERGKQMKDTEVLEKCKARKAVESGGRSAAASLDGFLKGLSSQ\*

>Selmo1\_178031\_estExt\_Genewise1Plus.C\_430193

MGSLSKLHVVLIPVPAQGHVVPPIYLARKLALLGVTVTIINVDLSIHETLQSSWKREDNPVSNHNRLES  
ISMDLRVPNGFDEKNFDAQAAFCEAIFRMEDPLAELLSRIDRDGPRVACVVSDFYHLSAPHAACKAGLAG  
ASFWPGNAAWAAIEFHVPKLLEMGDVVPKAGDEKLISYIPGMELRSQDIPLFMHDGEFEKNGEEQSLYRS  
KRIALDSWFLINSVHDIEPRIFEAMREGFGENFVPGPLFPLKGEAIDSTGLQEVNLRTPDESCLPWLDK  
RDRGSVLYVVSFGSISFMTAKQFEELALGLEASKVSFLWVIRSNSVLMDEEFYKGFVSRGTGGRLFVRWA  
PQLRVLKHPISIAAHLSHCGWNSVLESISNGVPLMCWPGAEQNTNAKLVIHDWKIGAGFARGANGLIGRGD  
IEKTLREVMDDGERGKQMKDTEVLEKCKARKAVESGGRSAAASLDGFLKGLSSQ\*

>Selmo1\_179380\_estExt\_Genewise1Plus.C\_520303

MASSKVHVLAVPAAAQGHISPMIHLCKFIAQDPSFTISLVNIDSLHDEFIKHWVAPAGLEDLRLHSIPFS  
WKLPGQADAHTMGNYADYATAAARELPGLEDLIRKLGEEGDPVSCIVSDYGCVWTQDVADVFGPIRIIL  
WSGNAAWTSLEYHIPELLEKDHILSSRASADEANSVIIDYVRGVKPLRLADLPGYLLASEGQEVWKEICI  
KRSPYVVKRARWVLVNSFYDLEAHTFDFMTSELGPRFIPAGPLFLLDDSRKNVLRPENEDCLRWMDAQEH  
GSVLISFGSIAVLSMEQFEELVGALEASKKPFLLVIRSELVAGGLSTESYNGFYERTKNQGFIVSWAPQ  
LRVLAHPSMGAFLLTHCGWNSVQESIANGIPMLGWPGYGGDQITNSKFVVEDWKIGVRFCKTVVQGLIGREE  
IEDGIKKVMDSDGEMKERVENLKILARKAMDKEHGKSFGRGLQAFLEDLKALS\*

>Selmo1\_183183\_estExt\_Genewise1Plus.C\_810253

MGSLSKFQVVLIPVPAQGHVVPPIYLARKLALLGVTVTIINVDLSIHETLQSSWKSEDNPVSNHDIRLES  
ISMDLRVPNGFDEKNFDAQAAFCEAIFRMEDPLAELLSRIDRDGPRVACVVSDFYHLSAPHAACKAGLAG  
ASFWPGNAAWAAIEFHVPKLLEMGDVVPKGEALIDLEVYKELISYIPGMEIRSQDIPVFMHDGEFQKNGE  
ELSLYRSKRIALDSWFLINSVHDIEPRIFEAMREGFGENFVPGPLFPLKGEIDSTGLQEVNLRTPDES  
CLPWLDKRDRGSVLYVVSFGSISFMTAKQFEELALGLEASKVSFLWVIRSNSVLMDEEFYKGFVSRGTGGR  
GLFVRWAPQLEILQHESTGAFLLTHCGWNSVQESIANGIPMLGWPGYGGDQITNSKFVVEDWKIGVRFCKTVVQGLIGREE  
GKDGAFPREEVEEKVRAIMEGEQGRRLKARAMEIRELAVKAASPGSSHTNLKKFVESLAW\*

>Selmo1\_186767\_estExt\_Genewise1Plus.C\_1360046

MASRKVHVLAFPPAQGHISPMIHLCKFIAQDPSFTISVWNIDSLHDEFVXHWVAPAGLEALRLHSIPFS  
WKLPRGVDANVAGNVGDWFTAARELPGLEDLIRKLGEEGDPVSCIVSDYICDWTQDVADVFGPIRIIL  
WSGNVAWTSLEYHIPELLEKDHIFPSKKGASPDEANSVIIDYVRGVKPLRLADVPDYLLASEGQEVWKEI  
CIKRSVVKRARWVLVNSFYDLEAHTFDFMASELGRFIPAGPLFLLDDSRKNVLRPENEDCLGWWSLAI  
NPGSVLYISFGSIAVLSVEQFEELAGALEASKKPFLLVIRPELVVGGHSNESYNGFCERTKNQGFIVSWA  
PQLRVLAHPSMGAFLLTHCGWNSVQESIANGIPMLGWPGYGGDQITNSKFVVEDWKIGVRFCKTVVQGLIGREE  
GEIEDGIKKVMDSDGEMKERVENLKILARKAMDKEHGKSFGRGLQAFLEDLKSLKDPSP\*

>Selmo1\_22903\_gw1.47.194.1

MDSQQAHLAFPPAQGHINPMMMLLCKRFASMGIVITFLNIRSRHNNLEEGDDQFRFVSILDECLPTGRL  
GNNVMKYLMALEEGMRGEFEQIVADLTADSSRPPLTCILSDAFMSWTHDVAASKFGICRAALWTSSATWAL  
LSLRIPLLRDNGVLPVNGIRSSKILDFVPGPLPIPAPRFLPETLQDPEKDPDFRLRIRRNNSVMQKDAWVLL  
NSVYEMEPLQLEELASSDNLHFITVGPLQCLMQPSKEHASQWQDRSCLWLDKQAPGSVYISFGSLAI  
LSYDQVEEILTGMEKSGHAFLWVIRLDLFEFEEIRAKFLEKISLIDRGVIVPAPQLEVLQHRVSGAFLT  
HSGWNSVMEALAAAGVPLLCKPCFADQILNTALVVDHIKAGLRATKPDDDKEVSSSRIHEVVSFAMGDDGA  
ELRERVKRLGQTLAEAAEHGSSLLNLQAF

>Selmo1\_23005\_gw1.1.398.1

MASLSSHILVLPYPAQGHIPPLIGFSAALADRGALVTLVNIASIDSRIRERWTWPRELEGSIRFESLDFP  
YDIPQGYDASCHVDQGNFVQALRGAQVPFEDLLREMLNRGERVSCIVADYLVGWVHVESAKKFGVSCASYW  
PGSATWINVHYHLPLLSISAGEAPIKGGKICLNSSLVTIYVDGDERTISYVPLSPTKLDKDFPYARMEFKG  
TLEYLMQEQEKTLRNFGDNSCLLINSAAEELPDAFQSLRKFVGEKCTGVGPLFNLDPARTRLCHSLREED  
GGCIAWLDQAPKSVLYISFGSVVALPDLELQELSKAVLEMERPFLLVLPPEQKNESTKEITEAARASSF  
TRGRIVSWAPQLQVLSHASVGGFLSHCGWNSVLEAVTNGVPVLGWPCAEQNLNCKVLVHDWKAGLKIDK  
AEK

>Selmo1\_231223\_fgenesh1\_pm.C\_scaffold\_11000033  
MAAEDKTHVL VLPYPAQGHLPPLHLHLSKVLAAANGIRVTFIFNIESIHKQLLKSWDPSAGKRIQFEALPFP  
EDIPFGDEFEALVPRLEPAPSCILADESLFWSKPIAKKFLPSVSYFPGNAAWSSISHHLCLLASKGVFP  
LRGTKPSICEAPELAPFDRCRSRARDRLCAWPFPTKLEDFPEYLHHEKETLEGWAKHPGKMKDATWVVL  
NSFYELEPHTFDAMKQTIGPRYLPIGLPPLTSTGSGEIKTSLRHEEHGCLEWLQTQAARSILYISFGSC  
SSLSEAQFEFMEGLAASKQQFLWVLRPDTVLNRCRDLYQKCTELTKDQGCFAVWAPQLKVLAHPSIGGF  
LTHCGWNSSTFESICNGVPMGLGWPRHSDQSLNCKLMSEDWKIGMRLGAFSKFLKRAEIAEKLSDFMDEKEI  
LEFRMNRKLENAAREAAGPGGSSYVNLESFFREMRGAI\*

>Selmo1\_231443\_fgenesh1\_pm.C\_scaffold\_13000088  
MATDSSSSSSGSSVVVVVPLPAQGHTPALVHLSRKLAAEGFSIVIVSVESVHRKIAARWKCSPQLDIRLE  
SIPFTSLIGEQLKICISDFHAWVWTPVAQKLGVPQVCFWWSGSAAWALIDRHVPLLVDLEYIPVPGCS  
LRGEKMISFIPGMDPPALDLPYYLHEFSKVPVWSLVAKSQRLN'TDKWFIANTFESLEPRETQAMKQLLG  
EQNFLAIGPLLDHEGLEQVVSLEEEELGCLEWLDSRPEGSVLYISFGSLAVLTQEQFMELALGVESG  
ISFLWVIRPAFLPQGDLPTEFFQGFDRDMVAEKRSIIVPWPQKRVLSHASIGAFSLTHCGWNSIVESVW  
SGVPMGLGWPCHSQNLNLRPVEKIGIGARVACSSRRTVHRERVRVAVRKAIEDGGEVRGAVRELRDL  
AVAAVVEGGSSNRDMATFLERLRLS\*

>Selmo1\_233488\_fgenesh1\_pm.C\_scaffold\_43000037  
MSQVHILAMPFPQGHSIMLNLVKHLISRSTSVVTVINIDSIRKHLHAATQTSPPSPSFDQLRFAAE  
SMNVELEKLLRELHPSSNFCCLISDYFLPWTQRVADKFGIPRVALWCGCAAWSSEFHIQDMVSRNHVVP  
LELDQASFLVDYIPGLPPLHPADIPTYLHTASERWIQMIVERAPLIRQAAWVLDVDFSELEPQVFEAMQQ  
RLGHKVFVSGPLSLLHSSSTIALRPADEQCLEWLDGQAPASVVYISFGSNAVLSVDQFEELAEALEAMK  
QPFLWVIRPELVTAARPDVLRDESGVEQRKAFLKTRNFGFVTAWSPQLKVLSHAAVGCFTVTHCGWN  
SIQESIASGVPMVGPWAAEQNLNCKLMAEDWKLGLRFHQGGVIVSVQIQKIIREIMEDHEVAELRAK  
AKQMKDVARAAVANGGSSFNLSRFCEELAAATSF\*

>Selmo1\_233672\_fgenesh1\_pm.C\_scaffold\_47000042  
MDYQQAHLAFPPAQQGHINPMLLCKRFASMGIVITFLNIRSRHNNLEEGDDQFRFVVISDECLPTGRL  
GNNIVADLTADSSRPPLTCILSDAFMSWTHDVASKFGICRAALWTSSATWALLSLRIPLLRDNGVLPIRM  
YSTGIRSSKILDFVPLPPIPARFLPETLQDDEKDPDFRLRIRRNVMQKDAWVLLNSVYEMEPLQLEEL  
ASSDNLHFIAVGQLCQLTPSKEHASQWQDRSCLEWLDKQAPGSVVYISFGSLAILSVDQVEEILTGLN  
KSGHAFLWVIRLDLFEFEEIRAKFLEKISLIDRGVIVWAPQLEVLQHRVSGAFLTHSGWNSVMEALAAG  
VPLLCKPCFADQILNTALVVDHIKAGLRATKPDDEKVESSRIHEVVSFAMGDDGGELRERVKRLGQTLA  
EAAEHGSSLLNLQAFCQDMKRRQAARVE\*

>Selmo1\_235293\_fgenesh1\_pm.C\_scaffold\_81000027  
MGSHKHLHVLIPLPAQGHVPIIYLARKLALLGVTVTIINVDSIHETLQOSWKSSEDNPAAFCEAIFRME  
DPLAELLSRIDRDGPRVACVVSDFYHLSAPHAACKAGLAGASFWPGNAAWAAIEFHVPKLEMGDIPVKA  
GDEKLISYIPGMELRSQDIPVFMHDEGFQKNGEEQSLYRSKRIALDSWFLINSVHDIEPRIFEAMREGFG  
ENFVPGVPLFPLKVEGIDSTGLQEVNLRTPDESCLPWLDKRDRGVSPLYVVSFGSISFMTAKQFEEIALGLE  
ASKVSFLWVIRNSVGLMDEEFYKGFVSRTGGRGLFVRWAPQLEILQHESTGAFSLTHCGWNSMLESACG  
VPMLGWPSMFEQNTNAKL VLEGEVGVAFSRSGGKDGFAFREEVEEKVRAIMEGEGQRRLKARAMEIREL  
AVKAASPGGSSHANLKKFVESLAS\*

>Selmo1\_271459\_estExt\_fgenesh1\_kg.C\_470003  
MEEMKQRPHELLAVPVAQGHMNPMLQLCKRLASSGFFITFLVSHKRENFIATEQRATGQHLRFVYLPDAL  
LPGVISASTVLEFTAILEKNLKLAVPEIIOQVMDADPSLPRVSCILTDVVITSLQDVARQFGICKVTLS  
FSASWLSIENGLVLKENGLLPLKGTSRIDFVPLPPIAGRDFTLQIQEVHPLDPDFSIRYSRNQIQN  
DAWVFINSFHELEKSQDLQARDNPRFVPIGPLLPFAFDSQVGVDEVEQERCGFWTEDMSCLDWLDEQP  
SKSVIYISFGSLANASPDHIKQLYSLVQSDYPFLWVIRSDNEELRKLFEDEPSYDKCKFVSWAPQLKVLK  
HPSVGAFLTHCGWNSLLETIVAGVPVLGWPFLEYEQPLNCLAVEHWKIGSCLPPSPDATIVEKTVKDIMG  
EAGQMWRDNVTKLAISAKDAVSDGGLSQNLQAFTCKMEIVS\*

>Selmo1\_404252\_fgenesh2\_pg.C\_scaffold\_2000240  
MKNLILPFLLAGHITPMLNLCCKLARITLRINQDAVETVDLANLKVPRVVLFTVFLCEGIIQMPRL  
ISQKIYSPFTKTNDNDLDVKLIQLPGYPAFKTLHSIFGFLRRKRERTVIEISQIGNPPVPAVSRRSPVLV  
GRAPAMHVASQRGQAHPRLVPRARRRGLRGRTPALRPSASWGTGSSYPNLSLRLPSAPSLQLPSSSEL  
EEILLGIEASGKSFLAFRTDVPVGDPSPLPAFLDRYKSPKSDLGNREMKGMIVPWAAQRKVLHSSVG  
GCFTHSGWNSALESSAAVPMIGKPIMGDQLGIRRAVDRWKIAFGHSRGGQ\*

>Selmo1\_407312\_fgenesh2\_pg.C\_scaffold\_6000563  
MGSLVDSRPHAVALPVAQGHVSPLHLCKALASRGFVITFINTEAVQSRMKHVTGDGEDGLDIRFETVPG  
TPLDFDLFYKDNRLIFFKSMEDMEGPVEKLLVDKISKRGPPVSLISDLFYRWSRDVAQRVIGILNVTFWT  
STAHSLLLEYHLPKLLEHGDIPVQDFSIDKIVITYIPGVSPLIWGLPSVLSAHDEKLDPGFARRHRTTQ  
MAKDAWVLFNSFEEGEAFEAAAREINANSIAVGPLLLCTGEKKASNPSSLWNEDQECLSWLDKQVPESVL  
YISFGSIATLSLEQFMEISAGLEELQRPFLWAIRPKSIANLEAEFFESFKARVGGFGLVVSAPQLEILQ  
HPSTGGFLSHCGWNSLLESISGGVPMICWPCIAEQNLNCKLVVEDWKIGLKFNSVATQKLVTRREEFVKVV  
KTMEEESGSDMRNNVKKIKEEAYKTVLKGSSYGNLQKFVESMRSI\*

>Selmo1\_407356\_fgenesh2\_pg.C\_scaffold\_6000607  
MAYTDTQSHPTQQHQGQQGFTSEGHVAPPAHPQPPGSSYYGPGVATMAPPNSGLWPTGLYGCTEDC  
PSSVFTGAAIFCGCGCLYSCLYRAKLRHKYGLPEEPCNDICTEWWCNCCSIAQAYRELNRNINPALGYE  
FARAVYEQPPVQEMRKIYPLMTDEQRLHVAVLPTTSGSHINPMLELRCRCLVPLGFQVVSFVYPSLRHDD

LHFRVVPSPADKLLMDPALQEDVRPVLEALRPPIKLIADMFLGWSQDVAESLGIPRVAFIPSDSVIE  
ATCYHIPELVSRGFVTHVVPANADPNPDALIDFIPGLEPFTRELLPLAFQNWGPIVTTLGVAAARRTKDAV  
CIVVNTIEELQEVVNGRRRLLFSSYLPVGPLVPAELLQEHPITLSSPNDTSMIWLDKQAYGSVLYIAFG  
SVVTLPAEDQVEKIARAVKATRQPVLAIRRNFADKDVENFYESLQEIGGEQAQLVVEWAPQVNVLRHSAV  
GAFLMHGGWNSALEALCCGVPMCLWPCANDQNLNALTIVKKWRTGIMVAHGPDKDDVRSEDLGNVIDAVMN  
GEEGRTMRSRAKELKKIVSVGNHPLPWQKQREVEVSDDGGETWRRARERKFECCAGKCNRRYGNLRSFNEH  
RCEKHKLPPVSQLPKGFKSRKGVPHGTYYALKKQRYNEERYRPQAGGRPSHQARIARLEALKAEVESYNE  
EDEDVNEYNSSEENEHEDEHEDDRGNSISEAEDDEM DGNFAAARD SIVEILMNIKESSDTAWCFVPIVAI  
LHRAKWSGACGFDPEGEHQAGAGVANRREGMELVDRSW\*

>Selmo1\_410681\_fgenesh2\_pg.C\_scaffold\_13000179  
MGSPKHVILVPFPAQGHILPLVYLARKLAAQGLSVTIINIDSIHENLRTWKHIEHQDIRLESIPMRLKA  
PKGFGADNLNDATAFMDAICDLEEAALAELEITKLSHHVSCVISDFYHLSAPLAAARAGIPSVCFWWSGAA  
AWASIHYSHSSLAAGLSPLESDTSKLVSNLPLGKPFRAEYLPYSYRKEFEYKNGGKYLSSLRREVEI  
DSCILANSIYELEPQVFDAMQQFVTGKFSVSGPLFPLKGGGASEMEASLRPESRGSLEWLDNQAPNSVLY  
WLDRAQASLTRAEMEELTQGLEASQKQFLMVASRDLAPEVDESFFREFGERLSRSGAGMLVSWVPLAVL  
QHGSVGGFLTHCGWNSTLESMSHGVPMLGWPCSDQNTNCKFILEDQIGMELRDKTRTGISM AIRSLMA  
SEEMRSRASHIERAAREAASENGSSYKKLHAFVHSIK\*

>Selmo1\_411023\_fgenesh2\_pg.C\_scaffold\_14000076  
MEELASYKGHIVAFPLPLQGHINPMLILCKALVSLGFSVTFVNAESNHRLLAHISAAPSTGIDFVPIPD  
HLDTPIATVDVHNSNNLLLVRNTVRKMRADFESVLKNIVSNVVKFILSEMSVGTQETADKFGIPKVTL  
FTESAASLSIQYHIPELLAKKHAPVRQGCPLQSIDYLPGFPLMTTADIPYSLSAHAEKLDPGFAQRVDR  
KKVLLKAKCVLVNSFDALHGVFAGLRKAFHQTVVVPGLPLPPAFLGTENGSNKPTTLPGMWPADDTKCK  
WLDRAQDGTTLVYVSGNSNATLTMDDFVRLARGLGKQLFLVWVRPTLVPGSSLELLKVVRRNSIYEGQ  
SCTVSWAPQLQVLLHPAVGWVTHCGWNSTLESICAGVPMCLWPLTAEQNLNCKFIADEWKIGVRLDDSD  
RCIEEITGVVESQGDQSMKTKVKKLKEAAIKESKLITKTIDDALSRSRS\*

>Selmo1\_412105\_fgenesh2\_pg.C\_scaffold\_17000058  
MGSSTGAELPHAAVLPITL RHITPFLHLSRALASRGFVITFINTEGNHRDLKDIVSQEESFGYGGGI  
RFETVPGIQASDVDFAVEPEKRGMLSEAVMEMQAPVESLLIRNMRDDDLVPPVSCFISDMFPWSAEVARR  
TGIVEVKFWIASASCVLLDCSFPRLMLEKGDVPVQDRSIEKYITYVDGLSPLPIWGLPRDLSAIDESRFAG  
RYARAKSFATTSWVLSFEELEGSATFQALRDISPKAIAVGPLFTMAPGCNKASLWKEDTESLSWLKQK  
SPGSVL YISLGTIATLSFDQFKEFSEGLRLLQRPFIWAIRPKSVAGMEPEFLERFKEAVRSFGLVVSRAV  
QVDILRHPSTAGFLSHCGWNSILESVASAVPMCLWPCVAEQNLNCKLIVEDWKIGLKFSCVTMPDPPEVM  
ARDEFVEVVERFMGTDESEHLRINVKLSEEARAVSSGGSSYENLERFAQAVKIS\*

>Selmo1\_412109\_fgenesh2\_pg.C\_scaffold\_17000062  
MLEKGDVPVQDRSIEKYITYVDGLSPLPIWGLPRDLSAIDESRFARR YARAKSFATTSWVLSNFELEG  
SATFQALRDISPKTIAVGPLFTMAPGCNKASLWKEDTESLSWLKQKSPGSVL YISLGSATLSFDQFKEF  
SEGLRLLQRPFIWAIRPKSVAGMEPEFLERFKEAVRSFGLVVSRAVQVDILRHPSTAGFLSHCGWNSILE  
SVASAVSMLCWPCVAEQNLNCKLIVEDWKIGLKFSCVTMPDPPEVMARDEFVEVVERFMGTDESEHLRIN  
VKLSEEARAVSRGGSSYENLQRFQAQAVKIS\*

>Selmo1\_412745\_fgenesh2\_pg.C\_scaffold\_18000321  
MAAATLAHIVAVPILLQGHIA PMLHLAHAIARTGRAIVSFITTESHARALAGSKHSWYWGIDESRLRFL  
GLPDSARSQGGEWIDEQGRWRGMDAFAGAITGHMAMEAALAATIEGLESVDCFISDSLSPVLDPIASK  
LGIPLAALWTGSASFALYLDIHDNGYIPVQGGKSSERVIRGVPVIGELQVTDLPTTLTYTDQIDPGYQRA  
YIGMARLREVQFAVVNACEGLEGEVLA EIRKSHPNLLPVGPLVKIPGDADDNHGPLNNSNVGLWDENHDC  
ITWLD SRAQRSVYISFGMSDFRFEIEISIGQIAATGRSFLWVLRREELVRDMPEDFVKMFARRTKEQG  
MVIPWSPQSQVLNKA VGGFFTHCGWSSCMEAILAGVPMALPRFVDQTFNAKVVCCDDWEVGLRMIPKGD  
VDGVVSRERVEVGINALVEKGGELSRAMEL RKKVAGSRESIEGFIDSILERRKD\*

>Selmo1\_417526\_fgenesh2\_pg.C\_scaffold\_34000302  
MGMVVNSFRMSFHAVLALLCPASFQTLKVGVPCKEDMDAERKIEEAMDSQAPHVLAFFPAQGHIPML  
HLCKRLSSMGFVITFLNIGSKNKSSATGDEKFRFMSISDECLPSGRLGNNLQMYLDAMEGLRGDFEKTVA  
ELMGDSQRPLTCILSDVFIGWTQVANKFGICRATLWTGCATRGLEYCHFSLLESNGLLPAQGSSRVL  
FVPGMPSSFAAKYLPDQLQVEEYDPGFLKRRQRNEIMRNDAAWLVNSVLEVEPSQIKEISRCWNPVFP  
IGPLYCLSDETSRLSADHAPWRQDRSCLDWLDRQAPNSVLYISFGLATASHDQAEILAGLDKSGSAF  
LWVARLDLFEDEDTRERILATVRNNQNCVLPWAPQLEVLEHKSVAFLTHCGWNSITEALATGVPMCLCK  
PCFGDQITNCALVVDHLKVGLRATVEEHDKQTS AHRIEKVVRLVMGESGQELRKRKAKELSDTVKGAVKPG  
GSSYANLQAFVQDMKRRLK\*

>Selmo1\_419482\_fgenesh2\_pg.C\_scaffold\_42000182  
MASQGTSSPKIHVLAFFVPGQGHITPMMHLCKKIAARDGFVSVFNVDLSLHDEM IKHWRAPSNTDLRLVS  
IPLSWKIPHGLDAYTLTHSGEFFKATTEMIPALEHLVSKLSLEISPVRCIISDYFFFWTQDVADKFGIPR  
IVLWPGSAAWTTIEYHIPELIAAGGHVFPSTLAEAKKLVADESIVDIKGLGPHQADVPLYLQADDHLWAE  
YSVQRVPYIRKASCVLVNSFYDLEPEASDFMAAELRKEFVADYQGRFLPLYEFDR TREWAKIPLLQEYKE  
YLGTA MAIAKQLRPGGALYSFRNHRLFSIPLY\*

>Selmo1\_419489\_fgenesh2\_pg.C\_scaffold\_42000189  
MASQGTSSPKIHVLAFFVPGQGHITPIMHLCKKIAARDGFTVSVFNVDLSLHDEM IKHWRAPPNTDLRLVS  
IPLSWKIPHGLDAHTLHLGEFFKTTEMIPALEYL VSKLSLEISPVRCIISDYFFFWTQDVADKFGIPR  
IVLWPGSTAWTTIEYHIPELIAAGGHVFPSTLAEAKKLVADESIVGIKGLGPHQADVPLYLQADDHLWAE  
YSVQRVPYIRKASCVLVNSFYDLEPEASDFMAAELRKGGEFTEFLSVGPMFLLEDEQTSIEGPTNVEKASVLY



ISFGSI AVVTVEQFEELAVGLEAIGKPFLLVLRPELLIGNPVEKYKEFCERTSKQGFTVSWAPQLRVLKH  
PSIAAHL SHCGWNSVLESISNGVPLMCWPWGAEQNTNAKLVIHDWKIGAGFARGANGLIGRGDIEKTLRE  
VMDGERGKQMKD TVEVLKCKARKAVESGGRSAASLDDFLKGLSSQ\*

>Selmo1\_419491\_fgenesh2\_pg.C\_scaffold\_42000191  
MASQGTSSPKIHVLGFPVPGQGHITPMMHVCKKIAARDGFIVSFVNVESLHDEIHKHWRAPSNTDLRLVS  
IPLSWKIPHGLDAYTLTHSGVPLLCWPWGVEQNTNAKLVIHDWKIGAGFARGANGLIGRGDIEKTLREVM  
DGERGKQMKD TVEVLKCKARKAVESGGRSAASLDGFLKGLSSQ\*

>Selmo1\_419579\_fgenesh2\_pg.C\_scaffold\_43000060  
MAKHIVALPFPGEHVSPMMHLSIFLAQQGFSITLAAMTIGPFD CYSFIKNGKTWPPP GTTNI SVKELTS  
TVPFPAEAI SENRADMTQILRYAQTYLALMEELVRAIPDEVCCIISDYLFDWCPKLA AKLGVLGVV LIPA  
SATVTWCELSIARLAAAGMVSPQPGELADDDAAVILTDPEIRRSEIPWHFCNDKAYQDHI AKFNSQALKA  
ADLAI VNTCMELEGQIVSAISQQMDDKFLPVGFLFNDEPHTVGFGVCDTDCLKWLDEQPPSSVLYISF  
GSFAVMTGDQMEEIVRGLEASSKFLVWIRPEQPEISKVRFPS TDQGMVVSWSPQTKVLSHPSVGAFLSH  
CGWNSTVEAVASGKPVLCWPLLFEQNTNSISLVRKWKVGIRFAKGRDGMVSRDEVERIIRLAMDGEGQRQ  
IRERAEELGEKIRSKNVP GSGLERFVTALSV\*

>Selmo1\_419580\_fgenesh2\_pg.C\_scaffold\_43000061  
MAKHIVALEGHVSPMMHLSIFLAQQGFSITLAAMTIGPFD CYSFIKNGKTWPPP GTTNI SVKELTSTDPF  
PAEATSEN RADMTQSLRYAQTYLALMEELVRAIPDEVCCIISDYLFDWCPKLA AKLGVLGLADDVILSDP  
EVQRSEIPWRNDKAYQDQPPSSHGCRSRHREHLPVGPLNDEPHTVRFGVCDTDCLKWLDELDISFGSFAA  
MTGDQMEEIVRGLEASSKFLVWIRLEQPEISKVRFPS TDQGMVVPWSPQRKVA VVGAFLSHCGWNSTVEA  
VARPLLATAVRADKKSIMHKINKENTI\*

>Selmo1\_419609\_fgenesh2\_pg.C\_scaffold\_43000090  
MEPNTRRASP ELPHLPCILGCKDPAEDDPKMYGATVMWGRSGVGFQDPRRDSYDKCRASLR RARKNLSS  
DRTLMLDLV LWTVDPPP AHLFVTSTDSLSA FHLLRMKNYNVLLACNSHAASLALLAAASA VVWQWGKL  
AREEGPV AQITDFHKDICALLQQAAL TSLQKPPESMLLSVTLGERMIAPQQRTGEFPRGKLLRARRLSV  
NAVKVKDGNL VGSPARQVLSVPETKESGRGEGFVRIRDGGSGKRQKTAKQIEEIALGLEASKVPFLWVI  
RSNSVLRMDEEGFVSR TGGRGLFVSWALQLETLQH ESTGAFVTHCS\*

>Selmo1\_419612\_fgenesh2\_pg.C\_scaffold\_43000093  
MAIHGSSRALPLGFLSTICPRCV ALAADEELQRSSGMQLSASPALLAAASV VVWQWAQDSPPVTLEKQESL  
QDFHKDICALLQQAAL TSLQKPPESMLLSVTLGERMIAPQQRTGEFPRGKLLRARRLSVNA VKVKDGNL  
VGSPARQVLSVPETKESGRGEGFVRIRDGGSGKRQNTAKQIEEIALGLEASKVPFLWVIRSNVLRMDE  
EGREARFKLTKLRFILVKPLSGFEVSTIVSFYKDDAQKPV EELKYNPQHVDYQKPFKVGQLSKDTL  
VTKAI VRSNLRYKFR LWGNIEYPCQWWFPMGHYDQDKPNPKSREL TIRYFDVKN EGKLT LAPQCKLKVF  
ERTSTRHSECEFDLHNL PQQKQPSIRQK KLP SRWDFVKKLL YFALKVFRRN\*

>Selmo1\_421853\_fgenesh2\_pg.C\_scaffold\_54000020  
MADASLARVSCMLTDVVITSLQDVARQFGICKVTLSTFSASWLSIQNGHLVLKENG LLLPLKGTSRIDFV  
PGLPPIAGRDFTLQIQEVHPLDPDFSTCSTSLLETIQCSFQS VHC SHHLHSTARLEWTKSSRGGRDNEEL  
QKLFEDPSYDKCKFVSWAPQLKVLKHPSVGAFLTHCGWNSLLETIVAGVSVL GWVPLDEQPLNCVLA VEH  
WKICYCLPRSLDATIVEKAGKNIMGEAGQMWINNVAKPSLRKMQYPMEMNEMKAAEKS AHKDK E\*

>Selmo1\_426276\_fgenesh2\_pg.C\_scaffold\_81000109  
MLLGLPSNSTFQSSWRWETFLSKNVIEGDDKLISYIPGMELRSPLFMH DGEFQKVREEQSLHLSKRITRD  
SWFLINSVHDIELRVFEAMREGFEANFVPVGPLFPLKGEAINSTGLKESVLYVLFGSISFMTAKQFEEI  
ALGLEAPFL\*

>Selmo1\_427027\_fgenesh2\_pg.C\_scaffold\_87000137  
MVRSEIILDVMADDSLPRVPCILTDV EPSRHR SFGICKVSLSAFSAWLSIQNGLLVLKENG LLLPLKGT S  
RIIDFVPSLPAQGFDTLQIQEVHPLDPDFSIMYSRSQIIQTD AWWFMNSFHELETPLQLDQLARDNPRF  
VPIG PLLLSFAFDGQVEVDELEQERCFWTE DMSSLDWLDEQPSKSVIYVSFGSLGDMIRQR\*

>Selmo1\_427031\_fgenesh2\_pg.C\_scaffold\_87000141  
MILCLECIDLAITSLQGVARQFLICKVTLSTFSASWLSIQNGLLVLKENG LLSLKDFVPLPPI SGREFP  
LHLQEVHVAVDPNFTLRDTPQFVPIGQLLPSFAFDGQVGVYELEQERCGFWMEDMSCLDWLDEQPSKSVIY  
ISFGSLGSQASFRGCVSHSLWMEFSFWRRSFVLGVSVIRWPFLYEQPLNCVLA VEHWKIGSRLPPSPDAT  
IVEKAVKDMMG EAGQMWRDNVTKLAISAKDAVADGGLSHRSF\*

>Selmo1\_427660\_fgenesh2\_pg.C\_scaffold\_93000022  
MPGHITPLLHL CQH LAASGCLVTLKTPENSQS VGAEKWENGVRISCLPLDPSKALPAVHKDDHGARLE  
KVL CYNRFQALNDDDSMLAIAEELSQSSGVPI SCVISD VYV GWARDLAAQLEVPWIALWTSTVADLLVR  
PLLPKNYA TFGFIPY ESLHKV LHTYKELVHKIPQADRVLVNSIEGIEGPAIDSLIGSGINIKHIGPLHLL  
SDKLG TSAQQGVDCCKESSAIIQWL GARDSSVIVYAFGTMPVADGQFEELASALEESRQEFVWAIRDS  
SLIPPGFQERM TKLDQGLV VSWAPQLEILGHRSVGGFLTHCGWNSVMESMSFGMPMVARPITGDQVLTAK  
FVIDEWGIGVGV RGIEMGRELARKDDLKNSIKALMEADPKTSEIWK NARRVKEVVRAAMKNKGSSRNND  
SLVHKRVKAKCH\*

>Selmo1\_428029\_fgenesh2\_pg.C\_scaffold\_97000057  
MAVVALQFMRGYKALS WLPD TAEMKHILIPFLLAGHITPMLNLCKLARITLLINQDAVETVVKIYEE  
LVAGGDL SAEVAFTVESIPFSWPPIRR LGRDTAKLAE EVA TRALESSSGPISFLLSDIGLVPRVVLFIT  
VFLEFGIILQMPRLISQKIYSPFTKTNANDLDVKLIQLPEYPAFKTSEIPRFPQFPDALQCYWNALLRCM

SRARENELILVNSCHELEEEAYVAGLRRYVRVLGVAGQDQLPSELEEILLVGGFFTHFGWNSALESISA  
GVLMIKGPIMGDQLGIRRFVADRWKIALDIPEDKDKKLLREAVKVALRELFNGEELYANAARLSKSVKKA  
QESGGSYKCWDMARK\*

>Selmo1\_429729\_fgenesh2\_pg.C\_scaffold\_119000050  
MADDSLPRVSCILIDIAITSLQGVARQFLICKVTLSTFSASWLSIQNGLLVKENGLLPLKDFVPGLPPI  
SEWEFPLHLQEVHTVDPNFTLGDTPQFLPIGSLPFAFDGQVGVYELEQERFSSIVPWVRFSLIVDEIL  
FWRRSFVLGVPVIGWPFLYDQPLNCALAVEHWKIGSRLPPSPDATIVDKAVKDDMMGEAGQMWRDNVTKLA  
ISEKDAVSDGGLSRRSF\*

>Selmo1\_430669\_fgenesh2\_pg.C\_scaffold\_136000010  
MWLGLTTEKVSLSGSGVPRDCVLRHNSVKHSFRVLHAPICPIGRDNGIPREEVPRRHLPRRGLREFYPRNL  
AISLHHSIPGPVKHGMKHTDRLVHAPVANARGDDDDVPAESFSPHEGRPRKNVPPHSSKHLDDQALELTVL  
RIRIVFQEVSAFVVIDYVRGVKPLRLADVDPYMQGEKVVKEICIKRSPVVKRARWVLVNSFYDLEAPTF  
DFMASELGRPFIPAGPQFLDSDSRKNVLRPENEDCLGWMDEQEPGSVLYISFGSVAVLSVEQFEELAGA  
LEASKKPFVLRPELVVGGHSNESYNGFCERTKNQGFVSWAPQLRVLHAPSMGAFLTHCGWNSVQESI  
ANGIPMLGWPYGGEQSTNYSRPLVQGLIERGEIEAGIKKVMDSSEEGKKMKRVENLKILARKAMDKENRK  
SFRGLQGWLEDLKAMTGTMTKSHTCPNKHNFCKSWSMCTIKWKTWNWLDKILVDKVMVLC SKIHVVVPLP  
EQGHMSPMIHLCKLIARDPSTISLVNVDLSLHDEFVKHWVAPAGLEDLRLHSIPYSWQLPLGADAAHQRN  
LAEWFTASARELPGGLEDLIRKLGEEGDPVNCISDYFCDWSQDVADVFGIPRIILWSGTAAWTSLEYHI  
PELLEKDHIFPSRGRASPEEVNSVVIDYVRGVKPLRLADVDPYMQGNEVWKEICIKRSPVVKRARWVLV  
SFYDLEAPTFDFMARELGRPFIPAGPFLDSDSRKNVLRPENEDCLGWMDEQEPGSLKVLHAPSMGAFL  
THCGWNSIQESITHGIPMLGWPYGAEQNTNCKFIVEDWKIGVRFSKTAMQGLIERGEIEDGIRKVMDSSE  
GKEMKERVESLKILARKAMDKEHGKSFRRGVQAFLEDLKLKLIHRE\*

>Selmo1\_430825\_fgenesh2\_pg.C\_scaffold\_139000002  
MGDVPVKEGDDKLISYIPGMELRSQDIPLFMHDGEFQKVREEQSLHLSKRITRDSWFLINSVHDIELRVF  
EAMREGFGAKFVVPVGLPFLPKGEAINSTGLKESLVLYVLFSGSIFMTAKQFEEITLGLEASKVPFLWVI\*

>Selmo1\_430829\_fgenesh2\_pg.C\_scaffold\_139000006  
MARTFASSPSRIHSRSCPGSIEKQSRILGPSQCSTCCCKKAGLAGASFWPGSAAWAAFEFHVPKLLEM  
GDVPVKEGDDKLISYIPGMELRSQDIPLFMHDGEFQKVREEQSLHLSKRITRDSWFLINSVHDMELRVFE  
AMREGFGAKFVVPVGLPFLPKGEAINSTGLKESLVLYVLFSGSIFMTAKQFEEITLGLEASKVPFLWVI\*

>Selmo1\_43841\_gw1.87.302.1  
QRPHLLAVPVAQGHINPMLQLCKRLASSGFFITFLVSYKRENFIAEQRATGQHLLRFVYLPDNLPLPGVI  
SASTVLELEFTALEKNLKLAVPEIIQDVMADPSLPRVSCILTDVVITSLQDVARQFGICKVTLSTFSASW  
LSIQNGLPVLKENGLLPLKGMFFFYSSLSTSRIIDFVPLPPIAGRDFTLQIQEVHPLDPDFSIYSRNQ  
IIQNDSSVWFINSFHELETSQLDQLARDNPRFVPIGPLPSFAFDGQVGVDELEQERCGFWTEDMGCLDWL  
DQQPSKSVIYVSFGSVANASPDHIKQLYSGLVQSDYPFLWVIRSDNDELRLKLFEDPSYDKCKFVSWAPQL  
KVLKHPVSGAFLTHCGWNSVLETIVAGVPVIGWPFLYEQPLNCALAVEHWKIGSRLPPGPDATLVEKAVK  
DDMMGEAGQMWRD

>Selmo1\_439509\_estExt\_fgenesh2\_pg.C\_70057  
MVLASRLVDSGARVSFLYPAHHESRLCDARSRPHSPEIRFVALHARDFDSAPNDFSRDFFLMPSLAQEFE  
QLVSSLQPPPSCLISDEVCGTLAKSARLLGIPRYILVPESASAFATLLAPSLARDSKPLQVARNETVD  
IPFIGMTVVAREYLSPLYLDTFPWRADYFLEGAIEAQASDGILVNTYRELEPSILSGMVDRDCLNPHRAPV  
FAVGPLIPEPSSVVGSHHQEEEEAEIMEFLDAQAPSSVVFVSGFTLIQRNEKDAREILSGLEQSGHPFIWK  
FSGDGDYVPTGAGKSLILRNWAPQLRILSHPSTGLFLTHCGWNSCLESSSLGVPILGFPFMDQPINCK  
LLVELRKAGVKLATLESFQIAEAIKEVMESEEIRRNAQKLLAADRAPKSLDFFVVDKLENSALHYL\*

>Selmo1\_440468\_estExt\_fgenesh2\_pg.C\_100505  
MAPTKQRHHTVVLPATGFGHLNPALELARQLAHRGVEVTIIVFHEHLPVAQRRVLKSPGFDAARASIRL  
VPEPKLRGDNPSQPIAALTQVIREEFKLDLDQAQAVPAENGVTKPSSLISDCFVKCQDTADELHPIRVV  
FWTAATLSESIFASVPLLSTGHIPVHTSPHKDIVSVLPGMPVPLATTRLPLCFYGVVDHDFSPFAIACF  
ENSSRAQGFANTVEEIEAEVAVQRSQQLRYFPVGPLIPPEVLEDAVDHPVIHWLDGKPPLSVLVIAFG  
TESILPLHQFEKLVAGLESSKRAFVWSMRKVVPEAEDEFYDSVKRRLAGQGLVVDWAPQRAILDHPSIGG  
FFTHCGWNSTLEALCAGVPTLCWAFGAEQNMNSLLMTHKWGIGVEVGHGPDVCDVDERGIGAAIEGLLAGE  
EGAAMRKRAMEMKGVVAAAMEPGGSSYESMNEFVRTFCPM\*

>Selmo1\_440629\_estExt\_fgenesh2\_pg.C\_110368  
MAAPPHRHALLVFPIDGPHLNALLPLSDRLADEEHGLQITVVLPQVTVDRNRAPLEREHPRMGFVGVDPDG  
RADVGFKSIGEVFKSLDRMREPLEDLLQSLDPPATLIIADGFGVGMQDVADKFGIPRVCFWASSATCEIL  
YFNLPLISRGYVPLKDPENAHELITIIPGLHPARRKDLPHCFLEHAQGLELMTSFSQRTVEALCVIGNT  
FELEAEAVAANQEKLRYFPIGPLPSWFFQDEHLPPEPTEEGDVSCIDWLDKQSPGSILVIAFGSARLA  
TEQADRLLKALEAAKFGFLVWFKDPDDALLRKAQSLGSRVVPWAPQLRVLRHDSVGGFSLHSGWNSM  
EAICSGVPLLTWPRFAEQNLNAKMVVDKWKIGLEINDDPNALVEPKLVQVMNAVMDGGQVSKELKANA  
MKLSEAAKGAASQGGSSHKNLLEFIEYSKNQAKKQQG\*

>Selmo1\_441500\_estExt\_fgenesh2\_pg.C\_170058  
MGSSTGAELGAPHAAVLPIPTLRHITPFLHLSRALASRGFVITFINTEGNHRDLKDIVSQEESFGYGGGI  
RFETVPGIQASDVDFVPEKRGMFSEAVMEMQAPVESLLIRNMARDDDLVPPVSCFISDMFPWSAEVARR  
TGIPEVKFWIASASCVLLDCSFRPMLEKGDVPVQDRSIEKYITYVDGLSPLPIWGLPRDLSAIDESRFAG  
RYARAKSFATTWVLSNFELEGSATFQALRDISPKAIAVGPLFTMAPGCNKASLWKEDTESLSWLKQ  
SPGSVLYISLGTIATLSFDQFKEFSEGLRLLQRPFIWAIRPKSVAGMEPEFLERFKEAVRSFGLVVSRAV

QVDILRHPSTAGFLSHCGWNSILESVAASVPMLCWPCVAEQNLNCKLIVEDWKIGLKFSCVTMPDPPEVM  
ARDEFVEVVERFMGTDESEHLRINVKKLSEEARRAVSSGGSSYENLERFAQAVKIS\*

>Selmo1\_441702\_estExt\_fgenesh2\_pg.C\_180234

METILREEEDYGGGARGAAKDPSPKPHVVALAYPMQGHINPMIHLCKRLASLGLSVSLVNTQTNHDLRLAR  
SRGAALQGLDIAMALADDEEDTSAHQGGAGAGGDDALQRSVAADAMERPFVALLQGLLDRGRGVDCI  
LSDAFLGWSQDVADRFQIPRAALWASSTEYCLLNFLHLELRTRGYAPIRDASVLDDDSHTIAFIDGVAPL  
HPKDLPSLQRYSSHDPGFEKRYARTRRLCDAYWILGNTFQDLEPDALDAIQQAINGDPTSAAKKRRNF  
SPVGPLPSAFLGLGGDDLGSNGLWIEDERCNVNLDKQSPSSVLYVSFGLAVMSSAEMLELAAGIESS  
RQPFLWVIRPGSHLGSFDLEGFVERTRQLGLVVQWAPQLQVLFHPSVGGFLSHCGWNSSTIESIAMGVPII  
GLPCIAEQNLNCKRAVKDWGVGCKLQQRGDGDGDAIVGREEIERVTRFMTGEDGMELRIRARELREAR  
RCVMDGGSSHKNEAFVEAVRINGLR\*

>Selmo1\_445219\_estExt\_fgenesh2\_pg.C\_540100

MVDDQVPHLLAIPFFFRGHEIPLHLHCRHFKSRGAKFLVTILRTSRSKPTAPPKDLAGFVRFEGFPDDI  
NLPAERNLELFIQFFKRFQGELGDFVLDLDRWQCRPVTICVDLVEWGERVARHLGVPVIAFWTSTVLEMA  
MASHVPRLIAENAIDKPEIIPGLPDFQVRDYVTLNINPNFPMKFMIESLVDTVRRTAGADMILAN  
SSGLEDDAIKTLESSGIKVPVGPPLHLIDQDNDPKDPKVISWLEQDPASVLYICFQTVAMPVQVQME  
ELAMALDSTGVSFLVVRHDHLKDIPPGFTAHHGINSNGTNGTNGGTNGCTARHRGLLTDWVTQPRVLGHR  
AVGGFLTHCGWNSVDESITAGVPMITRPLMGDQTLTAAMLQASMPALPTS KGGAVTKTEIVA AIEEL  
MVRREGAELRRRAGDAALVRSGMENGGCLDSLVELNILAKNPKNRLA\*

>Selmo1\_445660\_estExt\_fgenesh2\_pg.C\_590124

MGSQGPVVAIPYVMPGHITPLLHLQHLAASGCLVTLKAPKNSQSSGVEKWDNGVRRISCLPLEPTKP  
RPAVHKDDHGRLEEVLCYFNRFQALNDDDSMLAIAEELSQSSGVPISCVISDVYVGGWARDLAAQLEVPW  
IALWTSTVAELLVYHHMPRLIERGIFPAGDPSDEEFSIPGLPPLPKNYPTFGFIPYESLHKVLHTYKE  
LVHKIPQADRVLVNSIEGIEEPAVDSLIGSGINIKPIGPLHLLSDKLGTSAPQGEDCKKEPSAIIQWLGA  
RPDSSVIYVAFGTTMGSVANGQFEELASALEESRQEFVWAIRDSSLIPPGFQERM SKLDQGLVVS WAPQLE  
ILGHRSVGGFLTHCGWNSVDESMSFGMPMVARPITGDQVLTAKFVIDEWGIGVGVGRGIELARKDDL  
KNSIKALMEADPKTSEIWKARRVKEVVRAAMKNKGSSRNLDLSDVCDLHERVKA KR VFI\*

>Selmo1\_447400\_estExt\_fgenesh2\_pg.C\_890116

MVYQKSQTYLLTVALMPGGGLKTQAAHSNVWRSVASGNACSRIDTVGFALKGRECNFHD FCKNVTTKTEK  
EPHKFRVIRDDLLHPTLGGNKIRKLDVVPFLKDEEITDVTCGGCHAAAVALWRVLSMGHLLLRGEKL  
EVTGTYNLISEVYGNVETITPSENSKLEPGRGRKWA VLGEGGASGLALLGFIRLVRWLSENEVFERD  
DKIKIVVDSGTGTSAGLALGIALGLHQWEIVGVMLSGSRNYERQTKNLVTDFLQQRCDQLAEALS  
PLVWEERKRVRFRNDREKKTILRSNG\*

>Selmo1\_447949\_estExt\_fgenesh2\_pg.C\_1050061

MASRKVHVLAFPAPAQGHISPMIHLCKFIAQDPSFTISWVNIDSLHDEFVKHWVAPAGLEALRLHSIPFS  
WKLPRGVDANVAGNVGDWFTAARELPGLEDLIRKLGEEGDPVSCIVSDYICDWTQDVADVFGIPRIIL  
WSGNAAWTSLEYHIPELLEKDHIFPSRGKASPDEANSVIIDYVRGVKPLRLADVPDYLLASEGQEVWKEI  
CIKRSFVVKRARWVLSNSFYDLEAPTFDFMASELGPRFIPAGPLFLDSDSRKNVVL RPENEDCLGWMDEQ  
NPGSVLYISFGSVAVLSVEQFEELAGALEASKKPFLWVIRPELVVSGHSNESYNGFCERTKNQGFIVSWA  
PQLRVLAHPSMGAFVTHCGWNSVQESVANGIPMLGWPGYGGDQTTNSKFIVEDWKIGVRFCKTVGQGLIGR  
GEIEDGIKVMDSDEGKMKERVENLKILARKAMDKELGKSFRGLQAFLEDLKSLKE\*

>Selmo1\_447950\_estExt\_fgenesh2\_pg.C\_1050062

MASRKVHVLAFPAPAQGHISPMIHLCKFIAQDPSFTISWVNIDSLHDEFVKHWVAPAGLEALRLHSIPFS  
WKLPRGVDANVAGNVGDWFTAARELPGLEDLIRKLGEEGDPVSCIVSDYICDWTQDVADVFGIPRIIL  
WSGNAAWTSLEYHIPELLEKDHIFPSRGKASPDEANSVIIDYVRGVKPLRLADVPDYLLASEGREVLKEL  
AIKRSFVVKRARWVLSNSFYDLEAPTFDFMASELGPRFIPAGPLFLDSDSRKNVVL RPENEDCLRWMDEQ  
EPGSVLYISFGSVAVLSVEQFEELTGALEASKKPFLWVIRPELVVGGHSNESYNRFCERTKNQGFIVSWA  
PQLRVLAHPSMGAFVTHCGWNSIQESIANGIPMLGWPGYGGEQNTNCKFIVEDWKIGVRFKRVVQGLIER  
GEIEAGIRKVMDSSEEGKMKERVENLKILARKAMDKENGKSFRGLQGWLEDLKAMKLDRE\*

>Selmo1\_448116\_estExt\_fgenesh2\_pg.C\_1100034

MAAEDKTHVLVLPYPAQGHLPPLLHLSKVLAANGIRVTFINIESIHKQLLKS WDPSSAGKRIHFALPFP  
VDIPFGYDASVQEKRFVHFHQLLMSKLRDEFALVPRLEPAPSCILADESLFWSKPIAKKFGFLPSVSYFPG  
NAAWSSISHHLCLLASKGVFPLRDPECVIDYVPLPPTKLEDFPEYLHDMEKETLEAWAKHPGKMKDATW  
VLVNSFYELEPHAFDVMKQTIGPRYVPIGPFPLTSTGSGEIKTSLRHEEHGCEWLQTQAAGSILYISF  
GSCSSLSEAQFEFMEGLAASKQQLWVLRPDTVLNRCRDLYQKCRELTKDQGCFAVAPQLKVLAHPSI  
GGFLTHCGWNSVFESICNGVPMGLGWPRHSDQSLNCKLMSDWDKIGMRLGAFNKFLKRAEIAEKLSDFMDK  
EKILEFRMNVKLENAAREAAAPGGSSYVNLESFFREMRGAI\*

>Selmo1\_84049\_e\_gw1.6.243.1

MVERPRVVAVPFPMQGHISPLLQLSYQLAAAGIDITFVNTFRNHERLVGSREVVSKHSSGVITFMGISDG  
VAAKAFDGGFNESLNASLVASDEMAKPFEE LLWKLDGVSCVISDAYLGWAQAVANRFGVPRVALWTSNVA  
YSLVNYHLPLLVEKGYLGKDPSSVGFLDNLVTCVPGVEPIYARDLPTVLRYSDEGDPGFANRIRKIQAL  
KHASWLVNSFEELESAGVESMRRELGTQNYVTVPGLLVEDTGGRKSLWSEDEACKLWLDSPKPGSVLYI  
SFGSIAIAGAMRSIVKGLGDTRQPFVWAMRKNLLVPDSYSERSFQEFMGATKAQQGGLIVEWAPQVK  
VLQHRALGGHLSHCGWNSVLESMAAGVPIGWPCVAEQTMNCKRIAEDWKIGLRFITDDAKQQLVSDDEE  
ARVIKLFCEGEGREIKKRAREFSAIVKTA VSPGGSSHRNLERLVQAIKFGR LGKNSG\*

>Selmo1\_84376\_e\_gw1.6.249.1

MASSRESVPHVFIPLPTQGHVSPLMHLSQLASRGFVITFINTEANQECMKNTLEDGHGLDIRFETVPG  
IQGTGIDLSDHEGLIFTQGLINMEGPEKLLKDKLVSADPPISCLISDMLFRWPEDVARRIGVPSFIFW  
CASACILLECSVPQMEKGDIPVVPDLSDKSITYVRGLSPLPLWGLPCELSFSDDPGFTRRYNRINH  
VATVSGVLSNFELEFGSFAFQALREINPNTVA VGPVFLSSLADNASLWKEDTECLTWLNEQKQSVLYI  
SFGSLGTLDEQLKEILAGLEELQRPFILAIRPKSVPGMEPEFLEAFKERVISFGLVVSAPQLKILRHP  
STGGYLSHCGWNSILESVAVPILCWPCVAEQNLNCKLIVEDWKIGLKFSTRVDRPKVVARDEFVEVVE  
QLMGAESGDSFRNNVKELSKAAQRAAVKGGSSYESLDFVKAVEVL\*

>Selmo1\_84387\_e\_gw1.6.1029.1  
MESSTVVVFPPLVIGHITPMLHFAARLVSQGLKVTFVTRRTQSRVLRRAISETMPDSASTLKFSVIPDDQ  
LEEQDGTKKTGIEAIWEAIALMHSLRGTFERLLKEILDQEQRVACLVSDFLLDWTGEVAAKFHLPRAAFW  
TSNAAFLLLMIHAPDLVSSGCVPLRGKLNLPETKDEFIPYLEGVPRLRARELPFALHADSPADPGFKLS  
QSSIRNNLKASWVVTNTFDEIEVEAIAALRQFVEHELVLVLPVLPSSSSSLETAKDTGVILKWLNNKKA  
SVLYISFGTVAGIDSMRSIEELARGLEVSIGDFVWVFRNTLVEDKDEDFMEKFQERTKALEKGLVVPWAP  
QLQVLQHNAVGGFLTHCGWNSVLESISWGVPMLGWPCMAEQNLNQKFITDIWKIGVFPDAAAMDATAISSA  
VVKLMQGGKEGKWARKSARMRIAGQRALAPGGTSHKSLEEFVESLKLDRRA\*

>Selmo1\_84680\_e\_gw1.6.1024.1  
MADEQRLHIAALPCDGSGHINPMLELCRRLVPLGFHVSVLPRNLCSKVESSLREDDLHIDLVPSPPTDV  
SLIRAAELQEVKAVLEALRPPVKCLISDFLWGSQDVAASLGPQIALNTSHAINELVLFYHIPELEKED  
VLLIPLRVLSSLSGNPDHQTLDIFIPGLEPFPRLLPLGFQGGPVVLLGAAAKRTKEAACVLVNSIEE  
LDHELVTSSRRKEFPNYLVPVPLVPPALLQEHETISSPEEDTSISWLDKQPHRSVLVIAFGSVISLPADQV  
EKIAKAVQATHQPVLAIRRNFAADAPENFFESLQEKVGEHSLVVEWAPQVPLRQSAVGAFLTHCGWNS  
VLEALLCGVPTLCWPCA YEQNSNAHVMTKWKTVGLADGPDGKCEDLEKIIDAVMNGEEGKTMRRRA  
EALKEIVRKSTGLERNIRQLKNVIVAAASQ\*

>Selmo1\_84695\_e\_gw1.6.506.1  
MSDGAARNSAAWVFNTCPALEQPLIDAAREQGFDRFVPAAPLPPSFLGLGDLDRSSPQEFFTSSLWEQ  
DLSCLDWLDROPVSVLYISFGSIAAMNFSQLEVLGGLLDLGERFLWVLRPDLVSDMGEEDHARFLDRA  
KDLGLVVRWAPQLQVLRHGSTAAFLTHCGWNSFESICAGVPTICQPCFAEQKANAKYVVEVWKTGVKLA  
KGRHGFDFSKEDVLRSAIVMGGGEQTSIRKRAADLRDACRKFQEMSGLKAFADLLAKNKSASF\*

>Selmo1\_91632\_e\_gw1.12.788.1  
MLHISVNVETLLEKGFPLSRNDRSPEKKVVDSSVIPGIPCELSVFTDIPEDPLDPVGFSSMRKLNPL  
KAPRLLVNTLDEVEEQTLGALREQGRKLVNVGPLVPGGPNLEDTQKEWLDQAEISSALYVCFGTMLE  
LPPEQVMEVGYGLEASQQSFLVWLPSSQRKLGDFLEGLRTRIGKRGLIVSWSSQIDILRHPSVGGFVTH  
CGWNSTLESLSGVPWIPILGDQPINCKFMVDMWRAGVRIESKSSSDGSSRIVGRSEVERAARSLMGS  
ETLRKRAKEIKSKAMEVSRARLKELL\*

>Selmo1\_95398\_e\_gw1.17.140.1  
MGSKITPHVAVPLPAQGHISPLLHLQALASHGSLITFVNTEANQDSIKEMLGDGVEGIRFETFPGLE  
AAYHGLDLTQLENRQIFYRAILDMEAPVERLLREKIIAKGPPVSCVSELFPWMRDLAARIGVPSVYFWP  
TSAACVLLDFSIPLLERGDIPPETSDPDSVIDFIPGIDSLSIKDIPSSLLTSTPEGLERRSRIFSRNKE  
AACIFLNTVEELERKVVAAIQELLRPAKFLTIGPLPSSFLSDHPADENTVSAEGVWKEDMHCLSWLDER  
EPRSVLYVFGSMATLKANQIQELALGLESSQPFLVWMPNLVSESEAPNFCEDFVVRTKSQGLVISWA  
PQLQVLKHPVGGFLTHCGWNSVLEAVCSGVPLLCWPCFAEQHLNCKIIVDDWKVGLSFFRGSCHGVASK  
EVVHQVIRRLMVEDPGKEIRKRAIELRNEIRSTVTEGGSSDRNLSAFVDLISKRLV\*

>Selmo1\_95464\_e\_gw1.17.415.1  
MVVLPYPALGHLLPLIHLATKLATTGIIVTLLNVNSIHENLSRQWRCPDGMDIRLEQVHCDIFIPYGIDA  
KALKDTDGLLESRLERLQAPVEELVREMPPPCIIISDYFMRWAVGITKGLGLKVVTFWPGNAWSSIIHH  
TQMLVSSGDANLGLDENKLIRYVPLDFAFKRHLPSYFRKLVGFILEFFSVSADRMKDADWILVNSISE  
LETHAFDAMQALANKNFVSVGLFPCHTSPRVSRLRDEKSECLEWLHTQATSSVLVYISFGSLCLFPERQI  
VELAAGLEASKQPLWADVRHEFVSSEALRGFAERSRPRGMVVSAPQLQVLAHHSIAGFLSHCGWNSVL  
ESIFYGVPLLGWPCHEQSMNCKLVEDWKIGRRLSDDQDVARGRVEEVIRDFLEGQGMGEIRARMAALRS  
TVRSTTDQGGTSHGNLKRFDVAVNVSIAIAGTTWHGTSRPGSPKNDAT\*

>Selmo1\_95596\_e\_gw1.17.196.1  
MQAALPASKFAAIGPLFPVSHHESPAALKGVSLRDEEHGCLKWLDTTRAESSVLVVSFGSISVLSSETDFQE  
IAAGLEASQAFWVNRDLVKSATHDEFYAGFLERTREQGMVVSAPQVRVLAHSSIGGFLSHCGWNS  
TLESICYGVPLLGWPCHEQRTNAKLVEEDWRVGKRLWRRGDGDTVTRGVVEQRITFMSGMDKEIWAR  
AKDLKNVARATANPGGNSHENLATFARAVKTMGMGD\*

>Selmo1\_95612\_e\_gw1.17.147.1  
MAASVRELIRKQEEGNPVCCMITDTFNGFTQDLADEFIPRAVFWTSNAINDIYFLPELISKGFVPV  
ATRKTEELITLPGCPPMPATDLPLAFYDHPILGVICDGASRFAEARFALCNTYEELPHAVATLRSEM  
KSSYFVPGPCLSPAFFAGDSTAVERSSSEHLSPEDLACLEWLDTQKESSVIYVSFGSMATLSMEQLQELAR  
GLERSNQPFVVLVRKTLVADPSVHDFEGLKQRIGERGIVISWAPQMHVLLHPAVGGFLTHCGWNSVTEG  
ICAGVPMALWPCMAEQNINCKELVEHWKLAIPVQDDRDKNVSSERLADLVARLMRGDEGREMRARARE  
FRKVAANA VAEAGSSDRNLKAFQAALRDLEANN\*

>Selmo1\_95938\_e\_gw1.17.405.1  
MGSSTGAELPHAAVLPPIPTLGHITPFLHLSRALASRGFVITFINTEGNHRDLKDIVSQEESFGSGGSI  
RFETVPGVQTSEADFTAPETRPMFFALMAMQGPVESLLVRSMAARDLVPVSCFISDMLFPWSTEVPR  
RIGIPEVKFWVASASCVLLYSSYPQMLEKGDIPVQDFSMDKSIEYVRGLSPLPVWSLPRVFAFRDDPSFT

RRYERLKNIPQNSWFLANTFEELEGGALEAVRDYIPRIPIGPAFLSSPSMKNASLWKEDNECLAWLNEQ  
EEGSVLYIAFGSIATLSLEQAKEIAAGLEELQRPFLWGIRPKSVPGMEPEFLEPFKERVRSFGRVITWAP  
QREVLQHASIGGFFTHCGWNSVLESMAAGVPMICHPCVAEQNLNCKLVVEDWKIGLRYSNVGSGLVVRD  
EFQKVVKKLMEDDNGIAQYMRSNACKLSEEARKAVCVGGSSYQNLNFILSLK\*

>Selmo1\_96026\_e\_gw1.17.135.1

MTRKDLPLAFYDDDDVCLDFIGKACARRPEAFCVLANTFQLEPVAIAAMRERMRYFAIGPLIPRALLREA  
QLPREDLRDHEHLGCMEWLDRQLPASILYIAFGSVAVLSFRQVKEILDALQASNQAFWLSFRKNFVVDV  
PDNDHKALDELDRAPKMSRLVSWAPQLHVLHRPAVVGFTVTHCGWNSTMEAISSGVPMLAWPRTSEQNM  
NSKRMVEEWKIALGVNNHGQDTPPRVIQSREIARLIEELNGEKGSMKENVLRRLDALRAAHGPGGSA  
CESLREFAECFAKSPSLR\*

>Selmo1\_97269\_e\_gw1.19.401.1

MRADDLPFYLRKDFYHKLGRDRFLRQLERAAKDTWVLANSFYELEPQAFDAMQHVVPVKFVPGPLFPLR  
DREASGMEASLRPEDHSSIGWLDKPKLSVLYVAFGSITVLRPGFEFEELARGLEESGHPFLFSVPREMVP  
EVGDDRVGEFAERAARSGAGMVVRWAPQLAVLQHPVSGGFLSHCGWNSILESVSAGVPVLGWPIASEQNT  
NCKLALQERGVGMELADRSSGGVAVAVRELMASEELRRNVAEIGNARAAAAAGSSSHRNLDHDFHSCQD  
REILLQIKQQLI\*

>Volca1\_106361\_estExt\_fgenesh4\_pg.C\_420075\_AGD2

MYDSSVPRLLVRRRRAPSSGLGWPRSLIDGRGALWAMVGHSGDPAGYLEKQQRRQEAKEEEVEGAE  
EEVVEEEAALVARRVAAEYMRLSRASSLEQVYGMFSADAA YRSDALGTVCIGLPAIREMMNGFFARYPDV  
KWEVTSGLVDRSEPRPEAVKVAVEFNRYSTTETGEYVKRSGREWIYVDPKSARIVFVHVAPLDP\*

## YUCs

>YUC9\_AT1G04180

MENMFRLMASEEYFSERRCVWVNGPVIVGAGPSGLATAACLHDQGVVVERSDCIASLWQKRTYDRLK  
LHLPKKFCQLPKMPFDHYEYPTKRQFIDYLESYANRFDIKPEFNKSVESARFDETSGLWRVRTSDGE  
EMEYICRWLVVATGENAERVVPEINGLMTEFDGEVIHACEYKSGEKFRGKRVLVVCGNSGMEVSLDLAN  
HNAITSMVVRSSVHVLPREIMGKSTFGISVMMMKWLPLWLDKLLILSWLVLGSLSNYGLKRPDIPME  
LKSMTGKTPVLDIGALEKIKSGDVEIVPAIKQFSRHVELVDGQKLDIDAVVLATGYRSNVPSWLQSEF  
FSKNGFPKSPFPNAWKGKSGLYAAGFTRKGLAGASVDAVNIAQDIGNVWREETKRQKMRNVGHRRCSIV  
A-

>YUC3\_AT1G04610

MYGNNNKKSINITSMFQNLPEGSDFISRRCIWVNGPVIVGAGPSGLAVAAGLKREGVPFILERANCIA  
SLWQNRITYDRLKHLPKQFCQLPNYPDEFPEYPTKFQFIQYLESY AANFDINPKFNETVQSAKYDET  
GLWRVKTISNMGQLGSCFEFYICRWLVVATGENAEKVVPDFEGLEDVGGDVLHAGDYKSGGRYQGGKVLV  
VCGNSGMEVSLDLNHNANPSMVVRSVAVHVLPREIFGKSTFELGVTMMKYMPVWLADKTLFLARILG  
NTDKYGLKRPKIGPLELKNKEGKTPVLDIGALPKIRSGKIKIVPGHIKFGKGVLEIDGRVLEIDSVILA  
TGYRSNVPSWLKDNDFSDDGIPKNPFPNGWKGEAGLYAVGFTGRKGLFGASLDAMSVAHDIANRWKEESK  
QKKKTAARHRRCSHF-

>YUC10\_AT1G48910

METVVVIVGAGPGLATSVCNLQHSIPNVILEKEDIYASLWKKRAYDRLKHLAKEFCQLPFMPHGREVP  
TFMSKELFVNYLDAVYARFDINPRYNRTVKSSTFDESNNKWRVVAENTVTGETEVYWFSEFLVATGENGD  
GNIPMVEGIDTFGGEIMHSSEYKSGRDFKDKNVLVVGGGNSGMEISFDLCNFGANTILIRTPRHVVTK  
VIHGMILLKYAPVAVMVDLVTMAKILYGDLSKYGLFRPKQGFATKLFATGKAPVIDVGTVEKIRDGEI  
QVINGGIGSINGKTLTFENGHKQDFDAIVFATGYKSSVCNWLEDYEVVMKKDGFPAKMPKHVKGEKNLY  
CAGFSRKGIAAGGAEDAMSVAADDIRSILATLKN-

>YUC7\_AT2G33230

MCNNNTSCVNISSMLQPEDIFSRRCIWVNGPVIVGAGPSGLAVAADLKRQEVVILERANCIALWQ  
RTYDRLKHLPKQFCQLPNLFPEDIPEYPTKYQFIEYLESYATHFDLRPKFNETVQSAKYDKRFLWRV  
QTVLRSELLGYCEFEYICRWLVVATGENAEKVVPDFEGLEDVGGDVLHAGDYKSGERYRGRKRVLVVCGN  
SGMEVSLDLNHDASPMVVRSSVHVLPREVLGKSTFELSVTMMKWMPVWLVDKTLVLRLLGNTDKY  
GLKRPEIGPLELKNAGKTPVLDIGAIMIKSGKIKIVAGIAKFGPGKVELVDGRVLQIDSVILATGYRS  
NVPSWLKENDLGEIGIEKNPFPKGWKGAAGLYAVGFTGRGLSGASFDAMSVAHDIANRWEETKQKIKTV  
ATRHRRCISHF-

>YUC2\_AT4G13260

MEFVTEITLGRHIDPYVEETRCLMIPGPIVSGSPGLATAACLKSRDIPSLIERSTCIASLWQHKTYD  
RLRLHLPKDFCELPLMPFPSSYPTYPTKQFVQYLESYAEHFDLKPVFNQTVVEAKFDRRCGLWRVRTTG  
GKKDEMEYVSRWLVVATGENAEVMPIDGIPDFGGPILHTSSYKSGEIFSEKKILVCGNSGMEVCL  
DLNCFNALPSLVVRSVHVLPEMLGISTFGISTSLKWFVPHVVDRLRMSRLVLGDTDRGLVLRPKL  
GPLERKIKCGKTPVLDVGTAKIRSGHIKVPYELKRMHYSAEFVDRVDNFDAILATGYKSNVPMWLK  
GVNMFSEKDFPHKPPFNGWKGESGLYAVGFTKLGLLGAIDAIAEDIEVQRHFLPLARPQHC-

>YUC8\_AT4G28720

MENMFRLMDQDQLTNNRCIWVNGPVIVGAGPSGLATAACLHEQNVVFLERADCIASLWQKRTYDRLK  
LHLPKQFCQLPKMPFPDEFPEYPTKRQFIDYLESYATRFEPNPKFNECVQARFDETSGLWRVKTVSKSE  
STQTEVEYICRWLVVATGENAERVVPEIDGLSEFSGEVIHACDYKSGEKFAGKRVLVVCGNSGMEVSLD

LANHFAPSMVVRSSLHVPREVMGKSTFELAMKMLRWFPWLVDKILLVLSWMLVGNIEKYGLKRPEMG  
PMELKSVKGTKPVLVDIGAIEKIRLKGKINNVPGIKRFNGNKVELVNGEQLDVSVVLATGYRSNVPYWLQE  
NEFFAKNGFPKTVADNNGWKGRGLYAVGFTRKGLSGASMDAVKIAQDIGSVWQLETQKPTKRSRGLRR  
CISQQF-

>YUC1\_AT4G32540

MESHPHNKTDQTHIILVHGPHIAGPSGLATSACLSSRGVPSLILERSDSIASLWKSPTYDRLRLHLP  
KHFCLPLLDFFPKYPSKNEFLAYLESYASHFRIAPRFNKVQNAAYDSSSGFWRVKTHDNTTEYLSK  
WLIVATGENADPYFPEIPGRKKKFSGGKIVHASEYKSGEEFRRQKVLVVGCGNSGMEISLDLVRHNASPHL  
VVRNTVHVLPREILGVSTFGVGMILLKCLPLRLVDKFLLLMANLSFGNTDRLGLRRPKTGPELKNVTGK  
SPVLDVGAMSLIRSGMIQIMEGVKEITKKGAKFMDGQEKDFDSIIFATGYKSNVPTWLQGGDFFTDDGMP  
KTPFPNGWRGGKGLYTVGFTRRGLLTASDAVKIAEIGDQWRDEIKGSTRNMCSSRFVFTSKS-

>YUC4\_AT5G11320

MGTCRESEPTQIFVPGPIIVGAGPSGLAVAACLNRGVPSVILERTDCLASLWQKRTYDRLKLHLPKHFC  
ELPLMPFPKDFPKYPSKNEFLAYLESYASHFRIAPRFNKVQNAAYDSSSGFWRVKTHDNTTEYLSK  
TGENAEPVFPNIPGLKKTFTGPPVHTSAYKSGSAFANRKLVLVVGCGNSGMEVSLDLCRYNALPHMVVRNSV  
HVLPRDFGLSTFGIAMTLLKWFPLKLVVDKFLLLANSTLGNLGLRRPKTGPIELKNVTGKTPVLDV  
GAISLIRSGQIKVTQAVKEITRNGAKFLNGKEIEFDSIILATGYKSNVPDWLKENSFFTKEGMPKTPFPN  
GWKGEKGLYTVGFTRRGLSGTAYDAVKIAEDITDQWMKFNGLSCRNICSSHHIHLHFNKS-

>YUC6\_AT5G25620

MDFCWKREMEGKLAHDHRGMTSPRRICVVTGPVIVGAGPSGLATAACLKERGITSVLLERSNCIASLWQL  
KTYDRLHLHLPKQFCELPIIPFGDFPTYPTKQFIEYLEDYARRFDIKPEFNQTVESAADENLGMWRV  
TVGEEGTTEYVCRWLVAATGENAEPVPRFEGMDKFAAAGVVKHTCHYKTGGDFAGKRVLVVGCGNSGM  
EVCLDLNFGAQPSLVVRDAVHVLPREMLGTSTFGLSMFLKWLPIRLVDRFLLVSRFILGDTLLGLN  
RPRLGPELKNISGKTPVLDVGTAKIKTGDIKVCSGIRRLKRHEVEFDNGKTERFDAILATGYKSNVP  
SWLKENKMFSSKDGFPQIEFPEGWRGECGLYAVGFTRKRGISGASMDAKRIAEDIHKCWKQDEQVKKI-

>YUC5\_AT5G43890

MENMFRLMGSEDSDDRRRCIWNVNGPVIIVGAGPSGLATAACLREEGVFVLERADCIASLWQKRTYDRIK  
LHLPKVKCQLPKMPFPEDEYPTKQFIEYLESYANKFEITPQFNECVQSARYDETSGLWRIKTTSSSS  
SGSEMEYICRWLVVATGENAEPVPEIDGLTTEFEFEVIHSCYKSGEKYRGKSVLVVGCGNSGMEVSLD  
LANHNANASMVVRSSVHVLPREILGKSSFEISMMLMKWFPLWLVDKILLILAWLILGNLTKYGLKRPTMG  
PMELKIVSGKTPVLVDIGAMEKIKSGEVEIVPGIKRFRSHVELVDGQRLDLDAVVLATGYRSNVPVSWLQE  
NDLFSKNGFPKSPFPNAWKGKGLYAVGFTRKGLAGASADAVNIAQDIGNVWREETKRQKMRTRVGHRR  
ISVA-

>Debha\_Q6B458

MSQPELKKSKVDISKTTITVPGDHVGEVCEAIAKVLQAIEDATPYRNIKFNLQKHLIGGAIDATGTPL  
PDESLEAAKNSDAVLLGAVGGPKWGTGSVRPEQGLKIRKELNLYANLRPCNFASDSLELSPKSEIVK  
GTDFTVRELVGVIYFGERQEAESDKQTAWDETEKYSTEEVTRITRMAAFMALQHNPLPIWSLDKANV  
LASSRLWRTTVDKVMSEEFQTLIQHQLIDSAAMILVQSPTKLNIIITSNMFGDIISDEASVIPGSLGL  
LPSASLASLPDTNSAFGLYEPCHGSAPDLTENKVNVPATILSVAMMLRLSLDCVPEAEALEKAVGQVLD  
GIRTDGLRGSSTKEVGDAIAEAVKKVLNQS

>Chlvu1\_70408\_fgeneshCV\_pg.C\_scaffold\_1000167

MSDEERRNGPTPSCSDTKLPSKDHKITEITRAGNDALKQRACVIGAGKSGLIACKVLHERNIPDFCFE  
ASSQVGGWLWLNDSGLSASYESLRINTSKQMTSFHDFPMPKHYPTYPTRKEILEYLESYADHFGFRSHI  
TFRTEKATGHTLARLYTSVLVANGHHWHAAPWELPGSFTGTLMHSHEYRTPKVMGKRVVMVIGAGNSGM  
DIASEASQCGAAAVFLSCRRRVHVVPRIYFAGPDSILPAWLGVTAAPRRLMEKGVTCILIHISRGSQTSFK  
FPPPDFGLLRVHPTVSPGTGDILQLIKDGKVTVRPGIERIEDRTVHFTDGTKEIDIVCATGYNVSCP  
LPPKVEVLKGDQKQLLNVAHPRAPGIFLGFVQAHGMPMPCVEGQMPWVCKTNSECVQGITELPGEAEM  
AAKIAEQHEFNRRNFTQVKRHALMVEFHRYLLQLRMARCPKGGKWLGRKLWKAKTFLVFCGTGKC\*

>Phypa1\_1\_108750\_estExt\_fgenesh1\_pm.C\_3120009

MQQQSNMFPCTHNAEGGLTVLIIGAGPAGLATAACLRSKYWIPSIILERANCSAPLWRYMTYDRLRMHL  
PKQFCQLPLRPFPAVYPKYPTKNQFIAYLEDYQRHFGISPVYNATVTSAEFSTALGLWVVAIEQKLEDNC  
ETVYTTTSLVAVATGENAEPYMPDLFGSHKFGVISHGSTYRNGVKYKDMKVLVVGAGNTGMEISLDLAK  
FGAKPTLVARSKFHVMPRDLFGLNISAFQVMLMLLVPSVFDKLLVIFSRLTLGDTDHLNLRVPKEGP  
LKMKARTGHTPVLDVGTVAEVRNGFIKVAIDQLTKSGARFVNGVEEFDVIMATGYTSNVYEWLKID  
GMSINGFPKPRFRNGWKGRGLYAVGFGRKGLMGAHDAELVADDIGAHHRDNEKTY\*

>Phypa1\_1\_121794\_e\_gw1.37.68.1

MTREPFTFVEGAIIVGGGPGSGLAAAACLEMKGVPSLIIEKSDGIGSLWKYKAYDRLHLHIPKQFCELPY  
YAFPEYPLYPDRKQFVDYLENYFQHFDMWAKFNTKVSTASYDPYSSCWKVKTPQSEADSEGERREYRAK  
WLVVASGENAEPYTPVEGLKDFRGSVVHSSNYKTGAGYARQORVLVVGCGNSGMEIALDLNSFNAPSLV  
VRSPVHILPREIFGTSTFAVAMRMMKSFPLWFTDACLVWYTWAMLDGTTTRYGFKRPSDGPMTIKCKQKGT  
PILDVGTFAKIKSGAIVCPGLKYVTPDGALFENDQFVKFDAIVLATGYRSNVPQWLKDDSGFFTAEGLP  
KNHSGTWAERGLYIAGLGRKGILGATFDKAYIAEDLSRAYASESHKRLICPLQSR\*

>Phypa1\_1\_137645\_e\_gw1.139.33.1

MSKPLPTVVEGAIIVGGGPGSGLAAAACLEMKGVPSLIIEKSDGIASLWKYKAYDRLHLHIPKQFCELPY  
SPFEDYPLYPNKKQFVDYLENYFQHFDMRARFNTVVCASYDPSSSYWKVQTRPSGSLDSEGMLEFRAQ  
WLVVASGENSEAYTPKMEGLDSFQGPVLHSSNYRTGAHYQGQRVLVVGCGNSGMEIAMDLANFNAKPFV

VRSPVHILPREIFGTSTFAVAMRMMKTFSLWFTDLLLLVGYTRAVLGDITSYGFKRPTDGPMTIKCKQKGT  
PILDVGTFAKIKSGTIKVCVPGVDHLTPTGSKFENGQFEEDAIVLATGYRSNVPRWLRDESGFFSADGLP  
KNLSQGTWKAERGLYVAVGLGRKGILGATFDAKNIAEDISIVYRSDSHKRLISPLQSR\*

>Phypa1\_1\_143497\_e\_gw1.204.26.1

MGSFASTFVEGAIIVGGGPSGLAAAACLKMKGVPSLIIKSDGIGSLWKYKAYDRLHLHIPKQFCELPYY  
PFPEEYPLYPNRQKQFVDYLENYFQHFDMAKRAFETKVKTASYDPRLSWVVDTPQSGADSECVTEYRARWL  
IVASGENAEPYTPDLSGLRDFKGPVLSHSSTYKTGADYEGQVRLVVGCGNSGMEIALDLANFRAPKPSLVV  
SAVHILPREIFGTSTFAVAMRMMKSFPLWFTDMLLVWYTWAMLGDTSYGFKRPTDGPMTIKCKQKGTPI  
LDVGTFAKIKSGAIKVCVPGVEYLAPHGAHFANRQFAEFDAIVLATGYRSNVPPQWLKDDSGFFSAEGLPKN  
PSHGWTWKAERGLYIAGLGRKGILGATFDAKNIAEDISEAYSSESHRLVSPLQHR\*

>Phypa1\_1\_55917\_fgenesh1\_pm.scaffold\_22000038

MANSAPTFVEGAIIVGGGPSGLAVAACLTMKGVPSLIIKSDGIGSLWKYKAYDRLHLHIPKQFCELPY  
PFPEEYPMYPNRQKQFVDYLENYFRHFDMAKRAFNTKINAAAYDPQLSCWVSVESQPSAGSGECVTEYCSRW  
IVASGENAEPYTPDLSGLRDFKGPVLSHSSTYKTGADYEGQVRLVVGCGNSGMEIALDLANFRAPKPSLVV  
RSPVHILPREILGVSTFAVAMSMKRFPLWFTDALLVVYARAVLGDTSYGFKRPAANGPMTIKCEQKGT  
ILDVGTFAKIKSGAIKVCVPGVTHLTSQGAKEFNDQFAEFDAIVLATGYRSNVPRWLSDDGGFFSPEGLPK  
NPSLGTWKAERGLFVAGFGRKGILGATFDAKYIAEAISSDAWSLESHKHLVSPLKSRYPPP\*

>Phypa1\_1\_66487\_fgenesh1\_pg.scaffold\_11000006

MPPHKQPPSYCNGAIIVGAGPSGLATAACLKKGVLVHLEKSSCIASLWQTKTYDRLHLHLPKQFCELP  
HSPFPVDFPTYPTRHQFVEYLQEYAAARFKLQPLFNHSDLANFDSRSLWHVHVTCAGGKGDPPDREFRAR  
WLVVASGENAEPVIPSFKGSKFRRGGSKIFHSSRYRNGTEYEGKKVLVVGCGNTGMEIALDLANFGAAYS  
IVVRSPTHILPREMMFKSTFLVAMKLMKLPVWLVDWLLAYAYSALGNTAKFGIHRPSEGPMVLKEKHG  
KTPILDVGTLLKIKSGQVAVLPAVERLTPTGALFEDGRLEEFDAIVLATGYKSNVPSWLKDDSKFFSDEG  
FPRQPFPHGWKGENGLYVAVGLGRKGLLGASKDATRIAKDIYDGLSTEITSLRLVPCQLNQR\*

>Selmo1\_113792\_e\_gw1.47.9.1

MATVNGSPKIDPDALVDAWLAARLDSSLASGDASAAANLFEESTSFWRDLIAFTWNIVTVEGRSQIHAMLQ  
STLESVAPKGVWRNGTASYSDSGVIEAWIKFETRDAVCTGHLRLMATTSLCRTLLTAMEGLRDFPENK  
RTRPNGVTHGVIRHRASWLDGRKEEERTLGSTVQPYCVIVGGGQAGIGLAARLRQLGVPCIVVEKNRPRG  
DSWRNRYSKSLCLHDPVWYDHLPLYPPFNWPIFAPKDKMGDWLEAYTKIMEINYWTSSECLGARLDPQSG  
EWEVKILRDGSKEVTLRPKQLILATGMSGFPNVPRIQGEFVGGDLHSSKHGPGGEAYKKGRAVILGSNN  
SAHDIAADLWENGAAEVTMIQRSSSHVVRSESLFRFLTQEIYSESAVESGITTDKADMIFASLPYKIMGD  
AQRCSNDAIRAHDKDFYAAALTNTGFMLDFGDDDSGLFMKYLRRGSGYYIDVGASQLLIDGEIKLRSGVTI  
ASLKPSSVVLSDGTEIAADVVLATGYGSMNQWAAKLISQEVADRVGKCVGLGNSNTRKDPGPWEGELRNM  
WKPTAQEGLWFHGGNLHQARHYSYLALQLKARMEGIATPVYGMKPVHHL\*

>Selmo1\_178716\_estExt\_Genewise1Plus.C\_470420

MATMNGSPKIDPDALVDAWLAARLDSSLASGDASAAATLFEESTSFWRDLIAFTWNIVTVEGRSQIHAMLQ  
STLESVAPKGVWRNGTASYSDSGVIEAWIKFETRDAVCTGHLRLMATTSLCRTLLTAMEGLKDFPEKKG  
HTRPKGVTHGVIRHRASWLDGRKEEERTLGSTVQPYCVIVGGGQAGIGLAARLRQLGVPCIVVEKNRPRG  
DSWRNRYSKSLCLHDPVWYDHLPLYPPFNWPIFAPKDKMGDWLEAYTKIMEINYWTSSECLGARLDPQSG  
EWEVKILRDRSKEVTLRPKQLILATGMSGFPNVPRIQGEFVGGDLHSSKHGPGGKAYKKGRAVILGSNN  
SAHDIAADLWENGAAEVTMIQRSSSHVVRSESLFRFLTQEIYSESAVESGLTTDKADMIFASVPYKIMGD  
VNRPTYDAIRAHDKDFYAAALTNTGFMLDFGDDDSGLFMKYLRRGSGYYIDVGASQLLIDGEIKLRSGVTI  
ASLKPSSVVLSDGTEIAADVVLATGYGSMNQWAAKLISQEVADRVGKCVGLGNSNTRKDPGPWEGELRNM  
WKPTAQEGLWFHGGNLHQARHYSYLALQLKARMEGIATPVYGIKPVHHL\*

>Selmo1\_422043\_fgenesh2\_pg.C\_scaffold\_54000210

MATMNGSPKIDPDALVDAWLAARLDSSLASGDPSAAANLFEESTSFWRDLIAFTWNIVTVEGRSQIHSMLE  
STLESVAPKGVWRNGTASYSDSGVIEAWIKFETRDAVCTGHLRLVATTSLCRTLLTAMEGLRDFPEKKG  
RTRPNGVTHGVIRHRASWLDGRKEDERTLGSTVQPYCVIVGGGQAGIGLAARLRQLGVPCIVVEKNRPRG  
DSWRNRYSKSLCLHDPVWYDHLPLYPPFNWPIFAPKDKMGDWLEAYTKIMEINYWTSSECLGARLDPQSG  
EWEVKILRDGSKEVTLRPKQLILATGMSGFPNVPRIQGEFVGGDLHSSKHGPGGEAYKKGRAVILGSNN  
SAHDIAADLWENGAAEVTMIQRSSSHVVRSESLFRFLTQEIYSESAVESGITTDKADMIFASLPYKIMGD  
AQRCSNDAIRAHDKDFYAAALTNTGFMLDFGDDDSGLFMKYLRRGSGYYIDVGASQLLIDGEIKLRSGVTI  
ASLKPSSVVLSDGTEIAADVVLATGYGSMNQWAAKLISQEVADRVGKCVGLGNSNTRKDPGPWEGELRNM  
WKPTAQEGLWFHGGNLHQARHYSYLALQLKARMEGIATPVYGVKPVHHL\*

>Selmo1\_64527\_gw1.6.1083.1

WVEGAIIVGAGPSGMAATAACLQQLGITSSILLEKSDCIASLWQERTYDRLRLHLPKKFCPLAPFPSPHF  
PIYPAKQQLDYLHDYARRFHIRPRFGEIVQSARFDQRLQLWRVQTMKINNPDLGNISSEGNLSTMEYV  
RWIVVATGENAEARIPVEIPGMDLFAKIRHSSVYKSGARFAGQVRLVVGAGNSGMEIAMDLVQHDARPS  
IVVRSPIHILPREMLGKSTFGVSVAMKFLPLWLTDRLLLLYALLALGDTSRYGIRRPKTGPLEMKEKMG  
KTPVLDVGTLAHIKQGNKVEPAIECFASGCKFVNGEQHCYDAIVLATGYKPNVVKWLKDPHLNFSSDG  
FPSCGWRGQRGLYVAVGLSRKILGVS KDARLIAQDI

>Selmo1\_75206\_e\_gw1.0.589.1

MISDTSDDSSDSDLGGRSGSSSSSPHAPSPPPPRANSPIVDSSSWVEGAIIVGAGPAGLAVAAACL  
KDRGVPSIVLDAKNCIASLWQRTYDRLHLHIAKQYCELPSSLFARDVPQYPTKNQFIDYLHDYARHFEI  
QPLFDRCVVAATREQSGDRSLWRVETVDKRRGVREEFRSRWLVVATGENGAERIPEDLRPLDRFQGTVL  
HSSQYRNGKPFKQVRLVVGCGNSGMEIALDLLNHGAQPSIVVRSMPHILPREMFGRSTFAVAMSLMKLL  
PLRVTDKLLVMYATLALGNTTKYGILRSTGPLETKAKFSKTPILDMGTFRKIRSGSIKVMPCMEKIDRE

GVYFGDGRYESYDSIILATGYKSMVCSWFKDDGNYFSRDGFPKSGWNC DKGLYAAGMSRQGFVSKDAK  
HISDHIYDDFSFIERKRTNSIVNFKMMMK\*

>Selmo1\_80431\_e\_gw1.3.1238.1

MWVDGAIIVGAGPSGLATAACLSAAGIGSSVILEKNSCIGSLWQNRITYDRLRLHIPKQFCELPMSFPFDS  
FPIYPTRTQFVDYLENYAAHFQIRARFHECVQSAVDFPRLGLWRVRTIRESGEGDRERQAREYVGRWLTV  
ASGENAEPLLPWDLPLGLASFRGSVKHSSEFKNGCDYAGKSVLVVSGNSGMEIALDLVQHNAKPAIVVRS  
PVHILPREMLGFSTYSVAMKLLKHLPLVWADRLVSYAIAALGSTARHGIRRPDVGPMEMKVTKGRTPVL  
DVGTLKIKAGKIKVRPSLESLSSCSARFSDGQQGDYDAIIFATGYKSNVPQWLKGEVGNFSADGFPRC  
GWKGERGLYVAGLSRKGIFGGSKDAQMAIEDISKEYSLVHKLVTNRAKQQQQQ\*

>Picst\_CBS\6054

MINIHPLSRATTMAEIALKAQRNQQEQQQKRNFSQFTSYYYQFPKIPRPKRNVLYYSTWTSKGSKFMP  
RKNIHFPNLRISRRSLSNANQKLVKTKNFHKRFFSVEARKRRRQRRRFRWWTITSLAIVLGGVAAKVS  
YERGEQNDEESGPHQYRIKQPSWHLAYSTLPLKTIISRIWQVNSINLPVWVRSYRLYSALFGVNLDE  
MDEPDLTTYSNLSEFFYRKLPKIRPLGSDSLVSPSDGKVLKFGVIEDGIEQVKGMTYSIDALLGLKTQ  
RLAAPSHSLDFDYNDDFAVMERHEEFKINGISYSVDDIIGGEGSEYHINKLDYKDVHDGTAKGSRAT  
FSKEMAVAKNLAPTPLDAIKTSPNKQLYFTVIYLA PGDYHRYHSPTNWVTTLRRHFIFELFSVAPFFQKT  
LQGLFVLNERVALGKYWYGFSSMIPV GATNVGSIVVNFDKDLKTNERYEHEVYSRNSTPDENTPLEGV  
SDESSTDLTTLSTTSSEPKKKEKKLKNNTVYEATYTKASRLGGVPLSKGQEVGGFKLGSTVVLVFEA  
PENFKFNLQIGQKVKMGQSLGDFV

>Ost9901\_3|28322|eugene.1700010115

MRFLDDREFPTTQDALLFYAAFVLA WAVLPPVFWVCVELARALCLCKYIAFAFAAMFPAWCVMAVYVNA  
KKMRESVPLGVRRTKTVGEADPLQGRSNGAKRLCIVGAGAAGLCATRAALRRGFKVCTYEKSDSPGGVWAY  
GRRSGKVFNSVLQNVTKMANCFADYPAPRSFPA YVGRKTMELCYAAAQFQTSVIELNAEIVSVEKCA  
NGEFEVTIASGTPRKDNSLHRVERFDVWVWASGQLTKPETPVVRGLDSFTGDVVMHSSEYTEPTSFNRH  
VLVVGGAASGSDIAQDLSTTAASVTL SIRTERYVMSRGLKHGIATFLNWISLFTP AWLGVVGYTYFDWW  
PCVHRISPQVLDKFEFALQRIKRALVDRIQGREVFFVDGTSKGFDIIFATGYRREFNFMAENLR  
PTSGLFHECVLPTEPRVGYILFVLPFGTHWQVAELQANYLARVHDGTIPLPSIETMSVLAERFQTSSHHE  
HFAEYFRMKYLFLLAPYIFPKLETLLRQPRLLMRILWSPYVAPPCEWASESWRDRDTAYGDARGHMSVKWN  
KFRWNRW\*

>Osta4|14365|fgenesh1\_pg.C\_Chrom\_18.0001000086

MRLPNGERFRSERDGMVYLCFSAW TIAIAMGAVAVKEVARTAWRLVKVASSLFAVMLPCFCVMASTNA  
RRMRIGADAGEARKSSGAADPLGDAPRGRRLCIVGAGASGLTATRHALRRGFDVTTFEKSDSVGGVWAY  
GHDACKVFNINQNVTKLTVFADYPAKRAWPSYLGWRQTM DYLTYAAAFLSNEHIELNAEIVRVERDE  
KSGEFEVTIAYRGESATMTHRIERFDYVWV ASGQLTQAAMPEIRGLSTFTGDVVMHSSEYKPTLFAEKNV  
LVVGLGSASGSDIAQELSWVASSVLSIRTERD VYSRGILGGVASMMNRVAVILPAWLGVLGYTYLDCY  
WIHHLRKGVTDSGDLSSHAFALNKIKRVDVIERVHGSTVYFTDGTCSVYDVIIICATGYRRSDFDMAKNLQ  
NEKSGLFEDCILPSDPRVAVYVLFVLPFGSHWQLAELQSMLLARVHDGTIPLPSRET MATLADSFNIVGTH  
EHLAEWVKHRYIFVLPAPYIFPKLATLWRRPRLAMRILWSPVWVAPFGEWASENDRDRTCYRDSWALANVTW  
SGHRLNRCMFFPW\*

>MicpuC2|51167|EuGene.0000100238

MRKYVPDKYRAAIADVRPGAHDYVGGVCATSQVLRHVARYASLAPMVLGAPALARGVALAMLSCVVAFA  
LAAPAMLALAWMTWRRLGHPAPATRFEP RVEDDDDDDDDDDDDDDDDDDDDDATRTEDDASPTNASPRRRPVRR  
VAVIGGGAAGLATLRLQLLDVGV DATL FERSDDVGG LWSYDDRRACKVFDNVLQNVTKHHRNFAGHAAPAH  
WPVYLGHRHTLEYLRSAFRKFLRARVRLRSEVSRVEKNVDDG SFSVTVRRTEAFP AFVNDKAKAKAKAN  
ANATTKKPRYASCAFFPPENNAPEETPDEETHVFDACVCTGQLSRPKKISCPGIESFP GKVMHSSAY  
RVPGLLARKRVLIVGVGAASGSDVAQDACAARSVTVAARTDRWILSRGLSQGHPTLLLLLTTWMPAWLG  
VLLVLYGDWIPCLR VLAAGMTDSRDFLT SVALRKIAVVKSTVANVSGSTVTFRDGTSGTFDAIVFATGYA  
RDVFPMPKRLRPEATGLYKGVFAPSDPRVAVYVLFVLPFGSHFQVAELQARWIAMTFAGALGLPSAEVMEA  
HARDMEDEGHKLGEFHRVQFWRLCQKPNAVFDAIKSCIARPRRATSVAWARYAAPFQEWDP AFGAGSRE  
GEGEGDARLTRGQARFTDGEFGVPAWGAWKFA\*

>MicpuN2|63055|EuGene.1200010227

MGNKQSHPPNV CASPV SANPTQPKL SERDVTNLSRLYGH DNELLQ LMYAAELLRDC AKCVRDDARSYFLH  
AQHACDKQREFGARLRTLAERAERSTKGIHVPSGNNATPGSSSAPVPEAAVVAASPPSATSLEQPFLED  
DADSHPLDLAQPGVTEPLEEVLGTTTRIVSRLANAQMDGAERYAQFVAMFTHKLD EMARKVEKAHSMKLE  
RHAPSALAHEKAFNHITAPESRLRHLMLPENKRND DVEKKIDMAEVDLEKRAQLEATS RMLKRRRAKVF  
LNKFTPHVTDVRAFTLCQHRARLENAELLENVVAADPVERLRTVEHSRERCAWFIDTEDSDCPYVALDA  
SVSSPDVTPPGSGGDAMNGGASRTERSLAAEQTAGDAPQMSFFKCLEYQTTLMVLTHLLFGVVCYQIRQF  
HRVAVQCVSCRNIQSTATRFRRDKHLGFINLVPTKRTIHNRRRHPATHAPPPGLVSPSPSTFTVAMEKS  
STRATLS DAPWHPHLVW WCRMGVRYG SLLPLFFLGVLPLARVGVTCVYAAFVGLTCAMPFMVTLAWL TWR  
EFDHPAPATRREPRAGEPHPPRDP SAPRSEEEEEEEEEEEEEENDVGDATAPVRTVAVIGGGAAGLAALR  
QMLAHGMDAVL FERTDDVGG LWDYASPERSKVFRNLQNVTKTHNRFAGHHPPEDWP IYLGHEHTLQYLR  
SFAEKFGMLDRVRLRSEVTS CVETANGFELVIETEDTQPATQKTS PRAEKRSRSIRAAQSA AATTTIPST  
VRVSRTEVFDACVCTGQLAEPSPD DLINLKEAFTGAVVHSSEYRDRDLAEARVLVVG TGAASGSDIA  
QDACALAESVTVSRTHRWM IHRGLTQGAPTLLARTCSAMPAWFGSLLALYADWV PFFFFTPGMTDSRDFL  
NDVALGRITLPTISVENGSTVTFDGTSKDFDAIVLATGFKRAVPFIHHALRPTHRLGLYKGLTHPRRPR  
VAVYVLFVMPFGSHFQCAELQASWIAKVW SGCPTSPSIEDMERHADPFVDASHAKLGEHFRMRYLVL MFR  
EMFPLVEWARAGQWARAWRALWARYADPIGEWDPASAEGGGRGNEGHYLRAKMAPIVWRNIKFI\*

>ChlNC64A\_1|30388|estExt\_Genewise1.C\_50300



MWSRWMVCV ASPVFHRRPFS AARTLPPSTRAAAVMASSMSNAKQSLSVAVIGAGPAGHSARELLAGH  
RVTVFERRSSKVGWIWDEFRETFEDDDLQQRASVRGSVYAYLRNLPREVMGLPDFAFDSKFEGSRDARQF  
PAHDEVQRYLEFADEFELLQVFRFGMEVQRCPVQGHRAEGTVPSTWLRWEVVTRPAAQLQNEAAASS  
ELYDAVVV ANGHYSRPRVQQLPGQAAPGLMHSHSYRRPDPFGKTKVVVVGASSSGVDLAEELIANGGAK  
NIHAGSGGGGSHSDQIIKAPNLQEFHADGSITLADGSRADVDACVFTGHCSAGYIYDFPFLAGTDFV  
TVEDNRVGPLYQHIFPPAAAPTLAFVGIWVQVPPQFQLQSRWIAKVLGAVQLPSRQEMEQHVADFYA  
SLKATGVPVRYTHRQSDGMQWQYNAWLAEQCDEPGAAWREQMYKACGQSRKTNASKYRDASLPGAEAE  
QAAREEACRARQRAVHHSRDQSQ\*

>Volca1|106057|estExt\_fgenesh4\_pg.C\_370098

MQSTLTLRKETSRRHNARELVPEAYRRVVVGGPILGGSTKDSEIRCNYKDIHREDAPVQHVTESVERLV  
VDPVIRAAPWDAERLRSQEKPQACLLLISESDVRSVLAASLRVMLQDAGLEGQVELATCGTRPYNLG  
EGPEPAVVAEAMGLELPAQHAARLFDPAINDIVSYDLLL VMDKFTAGDVMREVSSFELINRTAQFSYKV  
RRLGELFPAPEAQEPPAVMQYSTAGDEMIEDPLYGNVGGEEEPSTAMNLYYWCCCKLPVNCQPPTAG  
REEQAVMRTARKIWKSCRGLVGLLLELGAVEASEVAGEREQSPCRPPLG PALRSRSGSEQPAGVLKEGW  
LARGAVIGAGAAGLAAARELRDEGHDVTVLEQSPYVGGVWR YDPRTEGDLG LGANPDRSRVHSSMYEKL  
TNLPRELMSFVDFPFDAFLGPRYSSDPRRFCGHAELVGLYDAFADYFELRALVRTRTRVLSVQLAEAAA  
AEGAAAAAAGPEDRCQHLKQQQEAAGKAATEPLSPRFVVTSEWLGPDGGSNIAEHAATAASPSR  
DRSQGHGDGQEA VSNDRDGGKEPQAARLRNQQQELYDAVVV CNGHYSEPRLPQVRGMYGSGSSPCDRG  
FRGQLHSHNYRSAEKLGRKVVLVGASNSGEDISRELSAGGAARVLSAWSKNEAWAADTAPYGPNS  
IYRFPMVSELHADGSATFTDGRREGPIDAVIYCTGYRYSFPFLRGSAAAAARVEDNCVGLWLHMLPPGP  
LAPGLSFIGLPWKVVPFPQFQMKSCLIARLLSGRVPLPSHDQMEADIAVHFAMRAQQLPKRYTHMQGQQ  
QFKYNDLLARCCGPDVEPLPWWRRAELNRIVGMQRRERPPDYRDAELADAGSEAAAAALSAAADFAVQVGR  
LTGLHGASLSASAAALEVKQAGTGTVAWREECRRAGAALCGRWPLPQALKSSAQLWTPHLTFSCGGRG  
\*

>Chlre3|188945|estExt\_fgenesh2\_pg.C\_120247

MDDPTAQAAVLLCSITLLAGHAAGDNLEAVASRPELCELVISQVIYLA VTPATLLTPGGGLTAARCQVM  
CWELTRGSGPDDLFEERLALAAQATSLVANLAGLGRGFELSAAGLAPQRAWLLRPGTLGLLRPVLEGLA  
DGLAELRHRMEDSSSAGEGAEKEQEKEQERLQALGPYADLRPSTVSRRLLDQAEGAVRNLLILLGLPT  
VVMGSSEEDVVEACGFVIRHAFGMFTGEGYVDTMRVLRAAVADPAASASGRAFTSPYPGDYANFFRAFAGH  
VETVAPALGVQLEDVGRVFTGEQAARDLPGMQVAEGVDARIAQSWLKGQIQEIINWGHSLVHLVMVLEAH  
NDIAGVNGYQDGLWLAHVLAGRVEPPAAAMEQDVREQQVWKRELLQDMQLHSRRKGANFLSECFGAYT  
RLRWTGSNHSWECLYADTA VEKFFKTRVDYV VCTGIFSNPFIPSPYASDFVGGQIHAHFRDVSVASG  
RRVLIVGAGKTGTDCACNLLASRAAAVSTMLYRQAHWPIPKRVLGLSTRTLFFSRMGAAATVPPYYTAGRL  
RTAVAAATKPLRALFWKGMVVAISSRFHAARATPPSVSLPGDLFYGGQVLDLSDLERLAKAGSLEAIRGEV  
NRFRVNGVILQDGSFHAADLVYCTGYAKTYDYFGPMRARLGLQKDG LYL YRNCIPPVGLAFVGEV  
STYSNIVTQGLQALWLAHVLAGRVEPPAAAMEQDVREQQVWKRELLQDMQLHSRRKGANFLSECFGAYT  
AADYSPLLSKRDAELVTGSLYPAHLRAPAAACSAAREGTPARRLSGDL SNCDADDEESVRSVAAAALA  
ATAAAMESGRHGGYGRSYRRASDTSGDGTCGGAGVGNWTT YPTAGMSFTSEAFQVAKAGIVNKHTGVDS  
SDSQHPQHSGASAMTEAAADCGSLSDGASSAPATKQSMSLLRKLRLRSSLRSSESATS VAGSNTPPT  
QPGPQTQGHSGASKLRIRIPSGCTS GDVLEGHGHAGHRSLESALRSGLSSEAAAAAAMGAITL  
VIGSSASQSARMWEASSPRAASAAATATGFLSAPSSKRGMSRSVVETRSMRGSVAAVAAAAAALAAAN  
TVANIQAAGYRSHRLCAQSSELVAAATATAFRRLSRRASVTTAADEGSGAATEEPQSSLRFFAQLRPA  
SAAAACQPSQGDPEFVQCSINDCGVLHGTASGAAASASVRRGSHGLEDVHRCSEQLASGSYSLGPGLSVE  
RNASADESAWDGLMAAETAGTPAAEPVPIPLGHAASDTCNHFDCSRQHGASCSSSSSLRRAFTA  
DVAASA VPPGGAGTGQPHSSTA VSPPLPILGGGRS NLSATTTGFWQGSPTPPLSRSRSHVPRAAAAG  
YSSAGAAAAGPGPAGIFAALPDGETPCSGASIGSAGLLSFTGDSAPPLQWPPAPPPALAAAATSL  
GGASGAGAAGSGASPPSLLLMLAHRRRHSALDPMPSMGLLETLEEDVSVTTATPSPFCGGVVVASESR  
ARSTGGVTGCEDDSDRPLSRQESSGCSLTRGSSDCLKVGVAAVHAARLVEKQGAQSLAASSAWLHTEL  
SST\*

>Chlre3|188966|estExt\_fgenesh2\_pg.C\_120284

MAPVGLDTSPPSSGSSWFKVAAIAAGVTLTAGVGYVIKYVLLPTFAEEDSPAEEAAPLSMQSLLTGGA  
GAKPAATGPVLPPLKAGGLPQRRCGQCKAVYYCSAACQKHHWPEHKAACA KPGAADKASPSEEAADAAA  
EEVSALVEVLRQAAEKAGTLDGAFEEAVMHFLGGK LATALS AFGSLQAAARQAGRS DLVLELHKWLGH  
HTKLGNFNAADAFNAGIDAAKAAKNTAARVDNSIGLGNLWKMAGQLTKAAEV LKEALLVAQEEDSAGMQ  
SEVLVALGNVMSVDAEEGLACLQIAVKLREDEAAAAAMVNMAAALFATRRFEQSKQAYEQAMEIFELMED  
HDKVIQVLINLANLAELQDTPGEALEIRKKNLNAALKEAGHSGPRKGANVVAECFGVYSAADYAPVVEGCDGPLLA  
DQSKDRGKQNI GRGEMPLSGASSFSAGRAGILPQLGR LQKVLVIGAGV SGLQ TARQLLKLGVQVLLLEA  
NSEIGGVWCSNYVGYGLQVPWKLYEFAEFPPGHSRTIPP GSWFNTSTGFGVNESPTAVVALQWPDHPAND  
YPTGQEVHDYVLAQAHFDDLHRVRLNSKLLRLRWDEESRTWGAVYMDTTSKFKYKLSADYVVVCTGIYS  
NPYIPAYPGAGDFVGTQLHAKDFDYSVTRGRRLVIVGAGKTALDCMSGLVSANTAASVTMLYRKSHPV  
PRSLGVSIRRLMFNRTMANMLPPYYTAGKLERASAVVTKPLRRLFWKGLECLIA RQFPAAATKNQPAVPL  
PGDLFHGGQILDDRVDLQLEADGCRMLRGEVNRFRVNGVILQDNSFLPADVLYCTGYEKT YDYFDGEMR  
SRLGLQKDG LYL YRNCPLPPGVPQLAFV GSEVSTYNNILSSGLQALWLAHVLTGRVTLPPPHAMHEDVRAQ  
QRWRREVMPQRTRGAVVMLYMSQFHDQLMADMGHSPRRKGANVVAECFGVYSAADYAPVVEGCDGPLLA  
AMAEHARVRNVNSPAAGALYDPPHPSTVSGAATRGVRSRSGSHSAYAYPCLPSGHPNMHHHPYAFTPSS  
SSGRGSAHSRPLLGLSPTSYPYGHPPDSASGRVSVGTSDMGTSGPSFADSASIRTRSPWGASGAAAA  
AALMSLPEAPRQSPQVPLAAAVTPGQTCDDVMLARIAAAGASTGSSSLGAGGAGPFGKVPTSAGTA  
TAAAPYLAQAQCSPLPEERRRAAATAAGGAATGGSAGAVDSASGSAPAPVAAQGPAAEQAGSAYAG  
VVEGDGDTGESAADTAAGGPAAGGTIAPATPQAAATQRLPGPDDTNNNGNGSGVSSAGSSMLYDRRRL  
SSSLGGLMVLGPAAATNSAGTPSYSPKRLAPAGWHGGGTGGSSVALPPSQHRWRRRHAHVHVDLLCE  
GL\*
